# Supplementary material for: Distinct waves of ovarian follicles contribute to mouse oocyte production
Source: eLife. 2025 Oct 7;14:RP107352. doi: 10.7554/eLife.107352 (PMC12503487; doi:10.7554/eLife.107352)
Supplement: Source data 1. — Excel file containing sample metadata, including sample code, number of reads, number of cells, average genes per cell, average UMI per cell, total detected genes, reference transcriptome used for alignment, and sample name. [file elife-107352-data1.xlsx]

## Sheet: Summary
Source data 1. Sample information
code	reads	cells	genes/cell	UMI/cell	total genes	transcriptome	sample
QY1	476825645	9471	3529	12424	22323	mm10-3.0.0	2-wk ovary
QY2	472309804	9253	2786	9056	21663	mm10-3.0.0	3-wk ovary
QY3	572204887	11077	2897	9581	21822	mm10-3.0.0	4-wk ovary
QY4	378857624	7779	3236	11406	22411	mm10-3.0.0	5-wk ovary
QY5	697785898	10583	3403	11881	21977	mm10-3.0.0	6-wk ovary
