# Supplementary material for: Distinct waves of ovarian follicles contribute to mouse oocyte production
Source: eLife. 2025 Oct 7;14:RP107352. doi: 10.7554/eLife.107352 (PMC12503487; doi:10.7554/eLife.107352)
Supplement: Source data 2. — Excel file with average expression values of genes generated using Seurat. Column A: gene name. Row 3: cluster and sample name (e.g., 0_O2w, where ‘0’ indicates cluster 0 and ‘O2w’ indicates the 2-wk ovary sample). [file elife-107352-data2.xlsx]

## Sheet: Average_expression_2wk_6wk
Source data 2. Initial clusters c0–c30
	0_O2w	0_O3w	0_O4w	0_O5w	0_O6w	1_O2w	1_O3w	1_O4w	1_O5w	1_O6w	2_O2w	2_O3w	2_O4w	2_O5w	2_O6w	3_O2w	3_O3w	3_O4w	3_O5w	3_O6w	4_O2w	4_O3w	4_O4w	4_O5w	4_O6w	5_O2w	5_O3w	5_O4w	5_O5w	5_O6w	6_O2w	6_O3w	6_O4w	6_O5w	6_O6w	7_O2w	7_O3w	7_O4w	7_O5w	7_O6w	8_O2w	8_O3w	8_O4w	8_O5w	8_O6w	9_O2w	9_O3w	9_O4w	9_O5w
Xkr4	0.0080668	0.00475353	0	0.00129992	0	0	0	0.000458165	0	0.000976372	0.00312554	0.00689963	0	0.00299466	0	0	0	0	0	0	0.00494098	0	0	0.00220524	0	0	0.00298599	0.00107509	0	0.000757084	0	0	0	0	0	0.00179695	0.00701694	0	0	0	0.000880386	0	0.00347787	0.00117526	0	0.00560227	0	0.0047533	0.00248226
Gm1992	0	0	0	0	0	0	0	0	0	0	0	0	0	0	0	0	0	0	0	0	0	0	0	0	0	0	0	0	0	0	0	0	0	0	0	0	0	0	0	0	0	0	0	0	0	0	0	0	0
Gm37381	0	0	0	0	0	0	0	0	0	0	0	0	0	0	0	0	0	0	0	0	0	0	0	0	0	0	0	0	0	0	0	0	0	0	0	0	0	0	0	0	0	0	0	0	0	0	0	0	0
Rp1	0.00155262	0	0	0	0	0	0	0	0	0	0	0.000955319	0	0	0	0	0	0	0	0	0	0	0	0	0	0	0	0	0	0	0	0	0	0	0	0	0	0	0	0	0	0	0	0	0	0	0	0	0
Sox17	0	0	0	0.000824884	0	0.00134465	0	0.00048819	0.000626352	0.000937559	0	0	0	0	0	0	0	0.00154162	0	0	0	0	0	0	0	0.00172178	0.000475054	0	0	0	0	0.007081	0	0	0	0	0	0	0	0	0.00146511	0.00127483	0	0	0	0.000810558	0	0	0
Gm37323	0	0	0	0	0	0	0	0	0	0	0.00199287	0	0.00200152	0	0.00464736	0	0	0	0.00120206	0.00070583	0	0	0	0	0	0	0	0	0	0	0	0.0070938	0	0	0	0	0	0	0	0	0	0	0	0	0	0.00201227	0	0	0
Mrpl15	0.572908	0.475227	0.445234	0.564951	0.652972	0.723971	0.702039	0.775629	0.786951	0.80502	0.793117	0.708599	0.636315	0.566571	0.782813	0.537479	0.50254	0.700485	0.683849	0.844629	0.569834	0.501916	0.477274	0.467128	0.680504	0.938187	0.914316	0.954469	1.16963	1.0131	0.413583	0.432528	0.280073	0.0678054	0.406743	0.500203	0.477416	0.494463	0.520096	0.663757	0.638253	0.580879	0.691066	0.6044	0.759521	0.485434	0.416931	0.387549	0.398738
Lypla1	0.30681	0.107524	0.141088	0.195504	0.251477	0.25714	0.119296	0.144816	0.227746	0.252017	0.234179	0.133656	0.115758	0.153381	0.171863	0.196739	0.121873	0.183398	0.255463	0.296268	0.242584	0.119983	0.159082	0.113467	0.233067	0.246973	0.125191	0.128146	0.212213	0.238901	0.261615	0.120466	0.112796	0.101277	0.195069	0.194254	0.114292	0.150515	0.18327	0.193478	0.259039	0.132787	0.148545	0.185813	0.199783	0.258264	0.118704	0.130745	0.151293
Gm37988	0	0	0.00159053	0.000599184	0.00109235	0	0	0.00120872	0.000728977	0.00318569	0	0	0.00254658	0	0	0	0	0.00160597	0.00255897	0.00375883	0	0.00298878	0	0	0	0.000743021	0	0.00097661	0	0.000358987	0	0	0	0	0	0	0.00157877	0	0	0	0.000927484	0	0	0.00427598	0.00221892	0	0.00695857	0	0.00660639
Tcea1	1.08052	0.941421	0.805077	0.999052	0.943265	1.07473	0.860064	0.737161	0.954338	0.917154	1.14382	1.1189	0.851552	1.1849	1.01088	0.9496	0.915648	0.803474	1.02248	1.08856	1.10668	0.967566	0.774935	0.998297	1.05915	1.12495	1.08619	0.843066	0.996019	1.03474	0.658739	0.535316	0.528287	0.627639	0.678459	1.10855	1.06176	0.724445	1.10916	1.18013	1.10695	0.988219	0.796913	0.995373	1.00028	1.11911	0.971303	0.819096	0.978339
Rgs20	0.00382604	0	0	0.00145992	0	0	0.00109649	0	0	0	0	0	0	0	0	0	0	0	0	0	0	0.00185018	0.00227921	0	0.00113346	0	0	0.00100636	0.00132966	0	0	0.00970042	0.00663067	0	0	0	0	0	0.00637531	0	0	0	0	0	0	0.00155902	0.0012599	0	0
Gm16041	0.00151804	0	0.00109355	0	0	0	0	0	0	0.000421088	0.000626859	0	0	0	0	0	0	0	0	0	0	0	0	0	0	0	0	0	0	0	0	0	0	0	0	0	0	0	0	0	0	0	0	0	0	0	0	0	0
Atp6v1h	0.336946	0.17513	0.215269	0.252974	0.24353	0.290714	0.175296	0.199283	0.334043	0.314905	0.334828	0.236732	0.284828	0.329744	0.314806	0.430779	0.240903	0.275847	0.485778	0.44471	0.33857	0.184667	0.216127	0.300303	0.25445	0.308681	0.194819	0.190116	0.26467	0.272538	0.333494	0.324727	0.370206	0.431107	0.434871	0.282357	0.162298	0.153733	0.332692	0.251409	0.214941	0.183181	0.20036	0.230371	0.222964	0.335744	0.189831	0.174568	0.244679
Oprk1	0.000941189	0	0	0	0	0	0	0.00040659	0	0	0	0.00057134	0	0	0	0.0135363	0	0.000501553	0	0.0011258	0	0	0	0	0	0	0	0	0	0.00087589	0	0	0	0	0	0	0	0	0	0	0	0	0	0	0	0	0	0	0
Npbwr1	0	0	0	0	0	0	0	0	0	0	0	0	0	0	0	0	0	0	0	0	0	0	0	0	0	0	0	0	0	0	0	0	0	0	0	0	0	0	0	0	0	0	0	0	0	0	0	0	0
Rb1cc1	0.92989	0.757702	0.741298	0.889154	0.861098	0.96768	0.859514	0.887915	1.20949	1.41327	1.02914	1.0448	0.996567	1.33261	1.21671	1.14049	1.05513	0.985303	1.3309	1.45725	0.846521	0.632189	0.729161	1.05008	0.987171	0.79354	0.717874	0.585525	0.895176	0.951504	1.48391	1.2833	1.09863	1.52647	1.10116	0.879243	0.808025	0.674137	0.970712	0.930966	0.711269	0.509987	0.575478	0.748517	0.663422	0.756214	0.641414	0.585052	0.973423
4732440D04Rik	0.0759019	0.0546378	0.05836	0.0780204	0.0585923	0.113246	0.068318	0.0845552	0.115414	0.104215	0.0936524	0.0835941	0.0772852	0.0827972	0.0856281	0.0782434	0.0652586	0.084856	0.0995939	0.106615	0.107338	0.0388765	0.103732	0.104544	0.102037	0.0835756	0.0646298	0.0689344	0.0742013	0.0580482	0.17464	0.107066	0.138737	0.0840406	0.268676	0.135329	0.0632146	0.059949	0.0718828	0.107224	0.112886	0.0449749	0.0713323	0.071529	0.0862819	0.105193	0.0514991	0.0347598	0.0950905
Alkal1	0	0	0	0	0	0	0	0	0	0.000644371	0	0	0	0	0	0	0	0	0	0	0	0	0	0	0	0.000807842	0	0	0	0	0	0	0	0	0	0	0	0	0	0	0	0	0	0	0	0.00186547	0	0	0
St18	0	0	0	0	0	0.00191196	0	0	0.00113744	0	0	0	0	0	0	0	0	0	0	0	0	0	0	0	0	0	0	0	0	0	0	0	0	0	0	0	0	0	0	0	0	0	0	0	0	0	0	0	0
Pcmtd1	1.15508	1.07016	1.19162	1.57421	1.24618	0.598082	0.439484	0.476633	0.590907	0.573956	0.701058	0.750341	0.795476	0.872297	0.713473	0.821333	0.806686	0.80026	1.12213	0.921822	0.764146	0.824273	1.03933	1.04335	0.854064	0.457483	0.353996	0.322738	0.414104	0.3941	0.614483	0.520758	0.424671	0.433687	0.488233	0.711292	0.763809	0.75477	0.983799	0.85691	0.548237	0.421507	0.439608	0.57397	0.559962	0.657506	0.62349	0.753015	0.825707
Gm26901	0.00450482	0.00529939	0.00279698	0.00506991	0.00417422	0.0383588	0.0269012	0.0225637	0.0222886	0.0251037	0.0896329	0.055313	0.040023	0.0398288	0.060623	0.0556779	0.0439846	0.0134546	0.019154	0.0173366	0.0045368	0.0165659	0.00996202	0	0.0025905	0.0841293	0.066778	0.0327229	0.0267989	0.0428831	0.190222	0.125934	0.056713	0.0830199	0.0599216	0.00665695	0.0138869	0.0177741	0.00432722	0	0.0199488	0.00927256	0.00312742	0.00485049	0.00979513	0.0142357	0.0140572	0.00481107	0
Gm30414	0	0	0	0	0	0.00231329	0	0	0	0	0.000620064	0	0	0	0	0	0	0	0	0	0	0	0	0	0	0	0.0008327	0	0	0	0	0	0	0	0	0	0	0	0	0	0	0	0	0	0	0	0	0	0
Sntg1	0.00185709	0	0	0	0	0.0174432	0.00613958	0	0.00299959	0.00345329	0.0103286	0	0	0.00164963	0.00286321	0.0127994	0	0	0.000390616	0.00108451	0.000624246	0	0	0.00529193	0.00978048	0.00845047	0.00490433	0	0.00466196	0.00395906	0.0380318	0	0	0	0.0353952	0	0.00439282	0	0	0	0	0	0	0	0	0.00201383	0	0	0
Rrs1	0.550636	0.518675	0.484375	0.748262	0.461655	0.670667	0.798045	0.627387	0.620401	0.603518	1.15205	1.10394	0.991299	1.1313	0.88793	0.758509	0.801147	0.601818	0.686952	0.672595	0.795963	0.765848	0.810045	1.51733	0.819043	1.10024	0.97879	0.800933	0.755362	0.833819	0.70735	0.955836	0.536104	0.804089	0.590882	0.662065	0.738475	0.715104	1.01667	0.613642	0.838673	0.827513	0.848681	0.997096	0.736297	0.685569	0.715174	0.651029	0.995026
Adhfe1	0.015265	0.00664536	0.0222496	0.0470447	0.0470441	0.0839275	0.0256494	0.0451354	0.066437	0.0848139	0.0468157	0.0271684	0.0283927	0.0606801	0.0487529	0.0442603	0.014912	0.03996	0.0681569	0.0849141	0.0259672	0.00664617	0.0353731	0.110502	0.0971817	0.0540257	0.0129161	0.0162325	0.0314266	0.0403692	0.0283857	0.0275129	0.0184996	0	0.0721463	0.0105004	0.00529534	0.0193667	0.0257512	0.0179661	0.0286314	0.00941831	0.0233481	0.024308	0.0264207	0.0231353	0.0085961	0.013481	0.066534
3110035E14Rik	0	0	0	0	0	0	0	0	0	0	0	0	0	0	0	0	0	0	0	0	0	0	0	0	0	0	0	0	0	0	0	0	0	0	0	0	0	0	0	0	0	0	0	0	0	0.0011948	0	0	0
Gm29520	0	0	0	0	0	0	0	0	0	0	0	0	0	0	0	0	0	0	0	0	0	0	0	0	0	0	0	0	0	0	0	0	0	0	0	0	0	0	0	0	0	0	0	0	0	0	0	0	0
Mybl1	0.00728483	0.0060491	0.00526755	0.0113016	0.0097357	0.0152033	0.0115401	0.0103926	0.00838454	0.0137798	0.0239813	0.0182581	0.0323604	0.0402466	0.0195791	0.0753244	0.00762046	0.00463275	0.0114018	0.0144371	0.026312	0.0122386	0.0252561	0.0208686	0.0266536	0.0644394	0.0604173	0.0531057	0.038827	0.0713121	0.0223069	0.012925	0.0135679	0	0.00989396	0.0156325	0.0136462	0.00576575	0.0326395	0.0129657	0.0159137	0.00838436	0.0259964	0.0164905	0.00945241	0.0217043	0.00954308	0.0116618	0.0149472
Vcpip1	0.327338	0.316061	0.310397	0.314314	0.287193	0.410068	0.357595	0.304444	0.361414	0.357108	0.39556	0.396876	0.441481	0.388866	0.303213	0.551483	0.267269	0.324342	0.429139	0.39828	0.408444	0.303723	0.366134	0.388888	0.340259	0.329683	0.303435	0.254368	0.265269	0.241037	0.61491	0.490282	0.43603	0.536827	0.471769	0.422286	0.370409	0.379999	0.371627	0.239861	0.297518	0.268983	0.288219	0.295736	0.247814	0.3358	0.250889	0.370921	0.284756
1700034P13Rik	0	0.00485005	0	0.00202818	0.000225737	0.00356602	0.00278236	0.00261426	0.000851364	0.00328934	0.00647776	0.00158597	0.0040344	0.00299466	0.00125588	0	0	0.00188843	0.000598742	0.00286064	0	0	0	0	0.000884785	0.00255205	0.0033437	0.00770178	0	0.00539292	0	0.00703342	0	0	0	0	0.00187297	0	0	0.00253878	0	0.000834084	0	0	0	0	0.00267178	0	0
Sgk3	0.161055	0.0808437	0.0482254	0.0684481	0.0694097	0.259416	0.0665726	0.0690947	0.0831033	0.0743359	0.157516	0.0486807	0.0319687	0.027901	0.0225402	0.181407	0.146566	0.15822	0.125953	0.15955	0.208504	0.0658484	0.0591622	0.12228	0.0864108	0.182869	0.0668232	0.0586965	0.111773	0.0949646	0.22699	0.100572	0.0845553	0.0400371	0.0951466	0.0884799	0.08992	0.081301	0.107495	0.104002	0.116676	0.0500133	0.0518849	0.0784341	0.0617862	0.122201	0.0691118	0.0524674	0.104255
Mcmdc2	0.032378	0.0173793	0.0102743	0.00632786	0.00829033	0.0190322	0.00567546	0.0154793	0.00850147	0.00846546	0.00882655	0	0.00482345	0.00290163	0.00663702	0.041918	0	0.00377077	0.0115113	0.0126584	0.0286296	0.0214985	0.00733577	0.0102711	0.00411639	0.0104223	0.0137475	0.0186779	0.0234198	0.0132253	0.080733	0.0374856	0.0640643	0.0428639	0.0583997	0.0374223	0.0171505	0.0379878	0.0155057	0.0040994	0.0224973	0.00929324	0.0101322	0.0115948	0.00327031	0.0367623	0.0102995	0	0.00940068
Snhg6	0.88641	0.18283	0.182781	0.553193	0.628784	1.55978	0.294034	0.50506	1.29779	1.85282	1.41975	0.264178	0.219105	0.966922	1.40492	1.21984	0.27903	0.356672	0.899631	1.09457	0.99828	0.160742	0.205565	0.584188	0.755501	1.14519	0.190259	0.210518	0.793487	1.21097	0.448985	0.0970938	0.147136	0.309113	0.429809	0.966819	0.136932	0.166582	0.608952	0.650836	1.28184	0.232901	0.242257	0.928628	1.20067	1.06427	0.160142	0.209915	0.693323
Tcf24	0	0	0.00212527	0.00188426	0.00580774	0.00695066	0.00608513	0.00116413	0.00960717	0.00732335	0	0.00107861	0	0	0.00301454	0.0134023	0	0.00339514	0.00811225	0.00432193	0.0105535	0.0224285	0	0.0189231	0.0185299	0	0.0022597	0.00189591	0.00421196	0.00129048	0.0237646	0	0	0	0	0.00404791	0.00631116	0.00404868	0.00640372	0.0135113	0.00239125	0.00258042	0.000716924	0	0.0038519	0.00361569	0.00685556	0.0161724	0
Ppp1r42	0	0	0	0.00307986	0.00199994	0.00220292	0.00181316	0.00112098	0	0.000705637	0.00184657	0	0	0	0.00244599	0	0.00911504	0.00118318	0	0.00157968	0	0.0040153	0	0	0	0.00472806	0.00118674	0.000696414	0.000891961	0	0	0	0	0	0	0.0010182	0	0	0	0	0	0.00204476	0	0.00275198	0	0	0	0	0
Gm15818	0	0	0	0	0	0	0	0	0	0	0	0	0	0	0	0	0	0	0	0	0	0	0	0	0	0	0	0	0	0	0	0	0	0	0	0	0	0	0	0	0	0	0	0	0	0	0	0	0
Cops5	0.93581	0.748866	0.705831	0.758923	0.719473	1.28496	1.24561	1.28898	1.22017	1.22314	1.31591	1.23916	1.21287	1.21253	1.2911	1.4669	1.33529	1.37344	1.19337	1.29101	0.736679	0.857961	0.771097	0.668685	0.866138	1.39853	1.45787	1.50757	1.41497	1.3734	0.737501	1.03353	1.1183	0.436817	1.25657	0.723753	0.624784	0.729579	0.739941	0.786131	0.924064	0.926224	0.927311	0.843072	0.95829	0.834196	0.696105	0.75539	0.643191
Cspp1	0.678215	0.57553	0.503398	0.473724	0.435528	0.934317	0.690198	0.701301	0.669504	0.878633	1.00846	0.926264	0.912152	0.914232	0.888336	0.618136	0.748904	0.69123	0.642883	0.70129	0.583038	0.522766	0.676068	0.641971	0.61946	0.904033	0.733746	0.699646	0.689074	0.766123	2.55929	2.18983	1.79565	1.1827	2.2449	0.678641	0.519169	0.471441	0.557264	0.517352	0.585022	0.459877	0.531036	0.49826	0.456543	0.633727	0.483816	0.438893	0.566517
Arfgef1	0.476316	0.519672	0.521834	0.43535	0.41471	0.609921	0.661836	0.6086	0.609838	0.688759	0.726316	0.748848	0.728413	0.631453	0.680518	0.815127	0.812562	0.701705	0.659431	0.654255	0.585838	0.481001	0.548516	0.516517	0.505791	0.560511	0.551831	0.542624	0.498615	0.540026	1.12518	1.01966	0.736959	0.718897	0.90421	0.614515	0.54905	0.460659	0.478169	0.494721	0.544865	0.511711	0.48268	0.45447	0.444495	0.645188	0.561136	0.539517	0.568759
Cpa6	0	0.0015238	0	0	0	0	0	0.000644777	0	0	0.000482888	0	0.0034582	0	0	0	0	0.000696814	0	0	0	0	0	0	0	0	0	0	0	0	0	0	0	0	0	0	0	0	0	0	0	0	0	0	0	0	0	0	0
Prex2	0.0163653	0.00960528	0.00126718	0.00622845	0.00335174	0.00346832	0.00885528	0.0195256	0.0162975	0.00747583	0.00345958	0.00101249	0.00201271	0.0111428	0.00560548	0.00788871	0.0316748	0.0202595	0.012157	0.0171608	0.01248	0.0175223	0	0.0284986	0.0192985	0.0115301	0.00105682	0.0104091	0.00293265	0.00529011	0.0509286	0.00859255	0.0594127	0	0.0264399	0.0146518	0.0206988	0.0147678	0.0129034	0.0833916	0.00830795	0.00532553	0.00607619	0.00263032	0.0024753	0.0243246	0.0145995	0.00231599	0.00543653
A830018L16Rik	0.00242689	0.00126949	0	0	0	0.00227103	0	0.00099124	0.00227105	0.00306346	0	0.000884788	0	0	0.00121511	0	0	0.00380397	0.00190705	0.00910332	0	0.003448	0	0.00164	0	0.00175617	0.00214924	0.00107509	0	0.000617167	0	0	0	0	0	0	0	0	0	0	0	0	0	0	0	0.00575942	0.0181714	0.00562585	0
Gm17644	0	0	0	0	0.000722675	0	0	0	0	0	0	0	0	0	0	0	0	0	0	0	0	0	0	0	0	0.00103507	0	0	0	0	0.0118697	0	0	0	0	0	0	0	0	0	0	0	0	0	0	0	0	0	0
Gm29663	0	0	0	0	0	0	0	0	0	0	0	0	0	0	0	0	0	0	0	0	0	0	0	0	0	0	0	0	0	0	0	0	0	0	0	0	0	0	0	0	0	0	0	0	0	0	0	0	0
Sulf1	0.106738	0.0542969	0.0155037	0.0242433	0.00904443	0.109002	0	0.0117449	0.00716652	0.00697796	0.20867	0.353125	0.272399	0.275003	0.332372	0.379381	0.172528	0.0248336	0.0144585	0.0114307	0.03215	0.0481591	0.0511159	0.0467856	0.0346358	0.0572101	0.0672669	0.0192589	0.0124549	0.0158015	0.225865	0.223774	0.0494347	0.10855	0.0430428	0.0703848	0.0615184	0.0643449	0.137261	0.0704898	0.0132862	0.00713031	0.0137046	0.0197584	0.00434741	0.0385275	0.0818196	0.0611237	0.0426977
Slco5a1	0.00989455	0.00220036	0	0.000773047	0	0	0	0.00228649	0.000655379	0.000738552	0.00312736	0	0	0	0	0	0	0.0136391	0.00526341	0.00495907	0.00691006	0	0	0.0022542	0.00107917	0	0	0.000554985	0.000922107	0	0	0	0.00671637	0.0170851	0	0.00238081	0.00263094	0.00352193	0.012348	0.00565487	0.005176	0	0.000942777	0.00242651	0.000820291	0.00746842	0.0130997	0.0106129	0.00551876
Gm29283	0	0	0	0	0	0	0	0	0	0	0	0	0	0	0	0	0	0	0	0	0	0	0	0	0	0	0	0	0	0	0	0	0	0	0	0	0	0	0	0	0	0	0	0	0	0	0	0	0
Prdm14	0.00286413	0	0	0	0	0	0.00215531	0.000453363	0.000565875	0	0.00706409	0	0	0	0	0	0	0	0	0.00148277	0	0	0	0	0	0	0.000388994	0	0	0	0	0.00979937	0	0	0	0.00245601	0	0	0	0	0	0	0	0	0	0.00123069	0	0	0.00205611
Ncoa2	0.298041	0.299418	0.285138	0.271864	0.247336	0.445828	0.390087	0.406165	0.43658	0.427485	0.334991	0.337456	0.443381	0.450487	0.31343	0.465131	0.608244	0.469456	0.442588	0.486149	0.350668	0.274512	0.392229	0.455346	0.325099	0.329525	0.367621	0.35662	0.350945	0.332414	0.755738	0.94557	0.749147	0.8496	0.565142	0.307625	0.378475	0.327413	0.313718	0.29925	0.222175	0.20662	0.269116	0.271252	0.238013	0.321566	0.242245	0.266968	0.30838
Gm29570	0.00272587	0	0.00172632	0	0	0	0	0	0.00273912	0	0.00200332	0	0	0	0	0	0	0	0	0	0	0.0030731	0	0	0	0.00119716	0.00166052	0.00107509	0	0	0.00559631	0	0	0	0	0.00158146	0.00231956	0	0	0	0.00317581	0.00131462	0	0	0	0.00179982	0	0	0
Tram1	0.706858	0.565624	0.379707	0.488421	0.526467	0.692636	0.572517	0.563577	0.601989	0.687708	0.545817	0.459225	0.523482	0.48789	0.525274	0.570657	0.571663	0.469631	0.508217	0.663026	0.779797	0.800141	0.576223	0.668261	0.779005	0.634043	0.673309	0.757534	0.686335	0.842983	0.635402	0.535227	0.512272	0.323654	0.617927	0.835947	0.680996	0.609055	0.631792	0.687715	0.798081	0.630869	0.623329	0.593079	0.73595	0.940604	0.722939	0.710205	0.675995
Lactb2	0.111328	0.0763134	0.068511	0.136409	0.110406	0.198576	0.0999537	0.0712845	0.184146	0.167745	0.113458	0.0918872	0.0732123	0.147568	0.105625	0.126115	0.0980922	0.0638915	0.144672	0.147671	0.132819	0.0770648	0.0978148	0.132899	0.111955	0.146734	0.086731	0.0851906	0.155112	0.149117	0.0764354	0.0668953	0.0510819	0.114317	0.0974902	0.0774887	0.0525134	0.061474	0.142025	0.119173	0.108597	0.0338583	0.0319939	0.0839789	0.0793546	0.102528	0.0712621	0.05356	0.116449
Xkr9	0	0	0	0	0	0	0	0	0	0	0	0	0	0	0	0	0	0.000790431	0	0	0	0	0	0	0	0	0	0	0	0	0	0	0	0	0	0	0	0	0	0	0.0010333	0	0	0	0	0	0	0	0
Eya1	0.00262592	0.00617602	0.00168079	0.00162857	0.00040383	0.0074637	0.00634186	0.00673914	0.00655796	0.00751479	0.0073324	0.0100742	0.00371291	0.00229106	0.00522546	0	0.012207	0.00736406	0.00789985	0.00620937	0	0	0.00311599	0.001797	0.0034054	0	0.00850825	0.00333716	0.00402475	0	0.0160609	0	0.0195686	0.0506765	0	0.00270804	0.0100548	0.00822627	0	0.0093065	0.000979155	0.00445605	0.00882952	0	0.0015327	0.0146672	0.0217567	0.00929008	0.00277572
Gm9947	0.00102418	0	0.00333035	0.00517511	0.0135932	0	0	0.000729211	0	0	0	0	0	0	0	0	0	0	0.000497758	0.00131572	0.002231	0.00536228	0.0344218	0.091974	0.0533707	0	0	0	0	0	0	0	0	0	0	0	0.00304061	0	0.0135057	0.00169097	0.00108543	0.00160566	0.0108401	0.0196489	0.0072148	0.00411345	0.0137117	0.023426	0.0263003
Msc	0.0049626	0	0.0122178	0.00929941	0.00889311	0	0	0.000302428	0	0.00126249	0	0	0	0	0.00365735	0	0	0.00154046	0.00060433	0.00216363	0.0160162	0.017444	0.0828266	0.175483	0.280758	0	0	0	0	0.00175084	0	0	0	0	0	0	0	0	0	0.0108747	0.000958145	0.000892485	0.03044	0.0371287	0.103878	0.00633137	0.0113387	0.0444178	0.0946558
Trpa1	0	0	0	0	0	0	0	0	0	0	0	0	0	0	0.001134	0	0	0.000898586	0	0	0.00241079	0	0	0	0	0	0	0	0	0	0	0	0	0	0	0	0	0	0	0	0	0	0	0	0.00111075	0	0	0	0
Kcnb2	0.0181394	0.0173662	0	0.00227507	0.00050866	0.028582	0.034909	0.045037	0.0587641	0.0314356	0.0890734	0.055112	0.0655895	0.025093	0.0224896	0.0653518	0.0812564	0.0417272	0.0268116	0.058236	0	0.00270612	0	0	0.00193545	0.0779498	0.0321165	0.0401039	0.0121982	0.0119892	0.15354	0.0714451	0.0814653	0.15672	0.0467313	0.00204762	0.00382488	0	0.00494306	0	0.00285524	0.0036428	0.0022445	0.00380622	0	0.000970458	0	0	0
Terf1	0.142743	0.117818	0.11007	0.159037	0.158554	0.223531	0.139408	0.153795	0.260274	0.318744	0.147454	0.139792	0.145751	0.247607	0.23923	0.200403	0.240396	0.13787	0.221432	0.215924	0.173282	0.133022	0.192923	0.289146	0.246321	0.205243	0.136814	0.149362	0.262057	0.234935	0.190336	0.283061	0.115778	0.316873	0.285394	0.177268	0.120704	0.118785	0.195669	0.287288	0.13032	0.0912713	0.141531	0.123532	0.146387	0.131136	0.0707577	0.129525	0.17544
Sbspon	0.0289675	0.0353286	0.00207607	0.00461772	0.00297444	0	0.00797146	0	0.00145093	0	0.00111552	0	0	0.00658893	0	0	0	0.00208618	0.00356189	0.00211258	0.00405983	0.00164234	0	0	0.0042552	0	0	0	0	0.00114773	0.00664062	0	0	0	0	0.00292944	0	0	0	0.0016897	0.00243168	0.000892485	0.00209668	0.0113125	0.000764642	0	0	0.00463881	0.00157021
4930444P10Rik	0	0.00152117	0	0	0.00105245	0	0	0	0	0	0	0	0	0	0	0	0	0	0	0	0.00309439	0	0	0	0.0010807	0	0	0	0	0	0	0	0	0	0	0.00124393	0	0	0	0	0.00206724	0	0	0.00144836	0	0	0	0	0
Rpl7	24.108	27.8432	30.4776	28.1139	28.6705	22.6958	28.1868	34.4289	29.0155	25.5173	23.5277	25.2208	25.957	26.1996	24.5885	19.7028	28.2617	32.9805	26.3991	23.8916	28.8587	32.0742	36.5708	31.974	31.1607	24.443	28.1278	31.148	29.996	26.4686	5.55932	7.47144	8.43705	5.82546	9.04431	25.6787	27.1306	29.9439	29.6345	28.9055	32.3529	38.4564	37.3249	36.7499	34.226	27.8009	29.6124	33.3246	29.8453
Rdh10	0.108599	0.157509	0.125435	0.128665	0.0877088	0.0470905	0.0458669	0.0390582	0.0567998	0.0579714	0.051504	0.066801	0.0864123	0.090698	0.0428421	0.18049	0.0656822	0.0522665	0.0524013	0.0626333	0.1707	0.140203	0.203767	0.168722	0.125632	0.0402952	0.0660712	0.0452663	0.0342087	0.0354953	0.117678	0.0927482	0.0414105	0	0.0315636	0.43679	0.549193	0.600887	0.322217	0.126809	0.115488	0.155247	0.174149	0.133009	0.102559	0.165767	0.169102	0.177007	0.257893
Gm28095	0.0013033	0	0	0	0	0	0	0	0	0	0	0	0	0	0	0	0.00519932	0	0	0	0	0	0	0	0	0	0	0	0	0	0	0	0	0	0	0	0	0	0	0	0	0	0	0	0	0	0.00169536	0	0.00211165
Stau2	0.176008	0.132451	0.101294	0.100363	0.110404	0.174136	0.171228	0.170552	0.244896	0.220782	0.272448	0.211691	0.224801	0.276746	0.261582	0.284217	0.205283	0.196722	0.228051	0.230423	0.159871	0.119176	0.10221	0.0801196	0.0942086	0.256465	0.202847	0.184964	0.20111	0.21684	0.192386	0.101928	0.0924957	0.118956	0.0757318	0.198608	0.177726	0.143359	0.137262	0.187489	0.167329	0.107944	0.0949838	0.118327	0.0884375	0.142127	0.142972	0.0910386	0.124058
Gm7568	0.00474122	0	0	0	0	0	0.00887174	0	0.0011142	0	0	0	0	0	0	0	0	0	0	0	0	0.00482065	0	0	0	0	0	0	0	0	0	0	0.0164244	0	0.0086972	0	0	0	0	0	0.00144997	0	0	0	0	0	0	0	0
Ube2w	0.458211	0.282474	0.253229	0.428742	0.465883	0.391549	0.23612	0.239855	0.40301	0.483862	0.453717	0.318201	0.322505	0.524496	0.446625	0.525192	0.265317	0.251901	0.417584	0.469412	0.380185	0.256482	0.210815	0.448753	0.416144	0.386226	0.246681	0.191192	0.289902	0.337798	0.411571	0.241494	0.187973	0.166175	0.449402	0.421087	0.332467	0.328748	0.406747	0.410343	0.303629	0.198334	0.227237	0.37721	0.414861	0.34999	0.227546	0.286678	0.32864
Eloc	1.47896	1.00441	0.89086	1.26141	1.34532	1.85981	0.990779	0.842886	1.34491	1.61894	1.4538	0.913665	0.877983	1.3626	1.34879	1.74222	0.943792	0.774584	1.25501	1.44362	1.47007	0.898275	0.860909	1.17766	1.10805	1.73797	1.28121	1.08963	1.73746	1.85431	0.721431	0.657629	0.418437	0.314958	0.85194	1.56382	1.18111	1.18115	1.52863	1.07485	1.5524	1.19058	1.06021	1.55732	1.27396	1.37312	1.05326	0.918538	1.27968
D030040B21Rik	0.00361508	0.00135172	0.00466194	0.0214476	0.00315743	0.00161865	0	0	0.000864455	0.00165671	0.00115712	0.000459673	0.00271386	0.00227978	0.0132076	0	0	0	0.00223838	0.00187746	0.00388629	0	0.0107185	0.00498987	0	0.0029049	0.00233292	0	0.000976238	0.00251464	0	0.00709701	0	0	0.0228978	0.00641888	0.00544191	0	0.0111163	0.00241054	0.0074266	0	0.00256513	0	0.00368976	0	0	0	0.000915929
Tmem70	0.432439	0.317747	0.359257	0.36122	0.404048	0.458272	0.385469	0.344587	0.347653	0.419387	0.458164	0.38981	0.455188	0.3518	0.512285	0.386363	0.328656	0.320654	0.354706	0.403585	0.413859	0.270759	0.293672	0.326885	0.42282	0.462566	0.40264	0.380342	0.430539	0.436434	0.168604	0.157354	0.173487	0.0915306	0.290372	0.334228	0.277656	0.310519	0.20179	0.352348	0.387397	0.385209	0.429985	0.362841	0.467883	0.298997	0.240842	0.356084	0.268563
Ly96	0.11154	0.048315	0.0581024	0.109449	0.0907807	0.0703758	0.0541306	0.0702857	0.114811	0.0922144	0.131399	0.0763754	0.085396	0.0552663	0.102155	0.0672212	0.0863876	0.0697261	0.137659	0.119436	0.103262	0.055095	0.0938359	0.138999	0.189319	0.0729257	0.0415588	0.0539148	0.0636696	0.0667861	0.0385248	0.0132231	0.0380889	0.154793	0.0572267	0.181807	0.0917948	0.0903707	0.126508	0.160772	0.117529	0.0614032	0.0760172	0.106358	0.155478	0.102214	0.064346	0.0349433	0.102971
Gm28376	0	0	0	0	0	0	0	0	0	0	0	0	0	0	0	0	0	0	0	0	0	0	0	0	0	0	0	0	0	0	0	0	0	0	0	0	0	0	0	0	0	0	0	0	0	0	0	0	0
Jph1	0.103347	0.114737	0.070564	0.0746451	0.0395106	0.153528	0.0802625	0.0366763	0.0448856	0.0426676	0.0232595	0.0452917	0.0428427	0.0416501	0.0139813	0.0518739	0.0736403	0.0347932	0.0312623	0.0405841	0.0398783	0.0411517	0.0252766	0.0123845	0.0354679	0.0666698	0.0607134	0.0294752	0.0492532	0.03741	0.109905	0.0907842	0.0694169	0.0450901	0.0339642	0.0463909	0.0340964	0.0442335	0.0458398	0.00402033	0.0348233	0.038744	0.0357838	0.0397725	0.0216602	0.031304	0.0411772	0.0243378	0.0319301
Gm28783	0	0	0	0	0	0	0	0	0	0	0	0	0	0	0	0	0	0	0	0	0	0	0	0	0	0	0	0	0	0	0	0	0	0	0	0	0	0	0	0	0	0	0	0	0	0	0	0	0
Gdap1	0.00130695	0.00132686	0	0	0	0	0	0	0	0.000953016	0.000907392	0	0	0.00215795	0	0	0	0.000628268	0	0.000463262	0	0	0	0	0	0.00172506	0	0.000513936	0	0	0	0	0	0	0	0	0	0	0	0	0.000623189	0.00228425	0	0	0	0	0	0	0
Gm28784	0	0	0	0	0	0	0	0	0	0	0	0	0	0	0	0	0	0	0	0	0	0	0	0	0	0	0	0	0	0	0	0	0	0	0	0	0	0	0	0	0	0	0	0	0	0	0	0	0
Pi15	0.559715	0.355725	0.292712	0.614838	0.56577	0.00212681	0.000932771	0.000427146	0	0.00166473	0.00703576	0	0	0	0.00317217	0.00828452	0	0.00152116	0.000973205	0.00551034	0.663465	0.361356	0.335961	0.675933	0.574891	0.0109901	0.00203581	0	0.00299747	0.000580756	0.0118328	0.0260341	0.00179306	0	0.00861807	0.0190409	0.0181405	0.0152215	0.0418546	0.0225024	0.156264	0.101361	0.0774041	0.136049	0.109213	0.33221	0.165502	0.149402	0.277537
Gm28154	0.00998566	0	0	0.011209	0.0145162	0	0	0	0	0	0	0	0	0	0	0	0	0.000513875	0	0	0.00265857	0	0	0	0.0204309	0	0	0	0	0	0	0	0	0	0	0.00165953	0.00348791	0	0	0	0.00563431	0	0	0	0	0	0	0	0.00418684
Gm16070	0.0148793	0	0	0.00402444	0	0	0	0.000542362	0	0	0.000830097	0.00116549	0	0	0	0	0	0	0.000407815	0.000465124	0.0141847	0	0	0.00273246	0.00299729	0.000881765	0	0	0.00138219	0	0	0	0	0	0	0.00608272	0	0	0	0	0.00849651	0.0017442	0.00133705	0	0.00156063	0.00150794	0.0023279	0	0
Crispld1	0.208287	0.0838329	0.0317229	0.0433828	0.0225252	0.0459295	0.00693492	0.00535881	0.00397797	0.00737353	0.0304708	0.0138972	0.0118906	0.0293446	0.014858	0.0358686	0.0187962	0.00362	0.00789853	0.0076189	0.206572	0.0590582	0.028662	0.0704721	0.0348005	0.0434577	0.00971051	0.00517469	0.00581295	0.00632339	0.00877178	0.0092399	0.0075624	0.0148386	0.0165985	0.107972	0.065677	0.022423	0.0238493	0.0182566	0.171681	0.0610894	0.0349029	0.074424	0.0508296	0.0983733	0.0165062	0.0236969	0.0222785
Gm28153	0	0	0	0	0	0	0	0	0	0	0	0	0	0	0	0	0	0	0	0	0	0	0	0	0	0	0	0	0	0	0	0	0	0	0	0	0	0	0	0	0	0	0	0	0	0	0	0	0
Crisp4	0	0	0	0	0	0	0	0	0	0	0	0	0	0	0	0	0	0	0	0	0	0	0	0	0	0	0	0	0	0	0	0	0	0	0	0	0	0	0	0	0	0	0	0	0	0	0	0	0
Defb18	0	0	0	0	0	0	0	0	0	0	0	0	0	0	0	0	0	0	0	0	0	0	0	0	0	0	0	0	0	0	0	0	0	0	0	0	0	0	0	0	0	0	0	0	0	0	0	0	0
Defb41	0	0	0	0	0	0	0	0	0	0	0	0	0	0	0	0	0	0	0	0	0	0	0	0	0	0	0	0	0	0	0	0	0	0	0	0	0	0	0	0	0	0	0	0	0	0	0	0	0
Gm15825	0	0	0	0	0	0	0	0	0	0	0	0	0	0	0	0	0	0	0	0	0	0	0	0	0	0	0	0	0	0	0	0	0	0	0	0	0	0	0	0	0	0	0	0	0	0	0	0	0
Tfap2d	0	0	0	0	0	0	0	0	0	0	0	0	0	0	0	0	0	0	0	0	0	0	0	0	0	0	0	0	0	0	0	0	0	0	0	0	0	0	0	0	0	0	0	0	0	0	0	0	0
Tfap2b	0	0	0	0	0	0	0	0	0	0	0	0	0	0	0	0	0	0	0	0	0	0	0	0	0	0	0	0	0	0	0	0	0	0	0	0	0	0	0	0	0	0	0	0	0	0	0	0	0
Gm28340	0	0	0	0	0	0	0	0	0	0	0	0	0	0	0	0	0	0	0	0	0	0	0	0	0	0	0	0	0	0	0	0	0	0	0	0	0	0	0	0	0	0	0	0	0	0	0	0	0
Pkhd1	0	0	0	0	0	0	0	0	0	0	0	0	0	0	0	0	0	0	0	0	0	0	0	0	0	0	0	0	0	0	0	0	0	0	0	0	0	0	0	0	0	0	0	0	0	0	0	0	0
4930486I03Rik	0	0	0	0	0	0	0	0	0	0	0	0	0	0	0	0	0	0	0	0	0	0	0	0	0	0	0	0	0	0	0	0	0	0	0	0	0	0	0	0	0	0	0	0	0	0	0	0	0
Gm28653	0	0	0	0	0	0	0	0	0	0	0	0	0	0	0	0	0	0	0	0	0	0	0	0	0	0	0	0	0	0	0	0	0	0	0	0	0	0	0	0	0	0	0	0	0	0	0	0	0
Il17a	0	0	0	0	0	0	0	0	0	0	0	0	0	0	0	0	0	0	0	0	0	0	0	0	0	0	0	0	0	0	0	0	0	0	0	0	0.00259353	0	0	0	0	0	0	0	0	0	0	0	0
Il17f	0	0	0	0	0	0	0	0	0	0.000662778	0	0	0	0	0	0	0	0	0	0	0	0.00216948	0	0	0	0.000850838	0.00230115	0.00119623	0.00377845	0	0	0	0	0	0	0.0015709	0	0	0	0	0.0012279	0	0	0	0	0.00095406	0	0	0
Mcm3	0.11587	0.113895	0.0839541	0.0410511	0.0575415	0.225504	0.515019	0.158126	0.216951	0.161932	0.177326	0.170295	0.210731	0.130674	0.153257	0.18356	0.0956264	0.137048	0.110454	0.0900396	0.114241	0.0658586	0.081066	0.0724444	0.0687203	2.3126	2.42597	2.25703	1.91274	1.98149	0.280907	0.370756	0.282164	0.0939893	0.107237	0.170944	0.148067	0.194265	0.0605958	0.122055	0.215139	0.273866	0.210868	0.106085	0.14242	0.183194	0.180065	0.113216	0.0538711
Gm28065	0	0	0	0	0	0	0	0	0	0	0	0	0	0	0	0	0	0	0	0	0	0	0	0	0	0	0	0	0	0	0	0	0	0	0	0	0	0	0	0	0	0	0	0	0	0	0	0	0
6720483E21Rik	0.00112559	0	0	0	0.00310369	0.00261769	0.00986072	0.0015317	0.0036847	0.00129292	0	0	0	0	0	0	0	0.00137584	0.000709482	0.000403274	0	0	0.00324313	0	0	0	0.00151591	0.00115974	0	0	0	0	0	0	0	0	0	0.00826375	0	0.00264096	0.00202384	0	0	0	0	0	0	0	0
Paqr8	0.0659574	0.00967479	0.031998	0.0411747	0.0354868	0.068154	0.0737992	0.0328043	0.0973783	0.135205	0.0366832	0.0296099	0.020182	0.0254229	0.0369658	0.0409511	0.0128849	0.0208985	0.0441344	0.0505932	0.0213715	0.0116356	0.0143165	0.0164725	0.0322332	0.0321333	0.0438385	0.0716683	0.10369	0.105317	0.0469253	0.0507165	0.0558937	0.0261804	0.106154	0.0287665	0.0272635	0.00861347	0.0185507	0.0289891	0.0176441	0.00239378	0.0148464	0.00962307	0.021329	0.020264	0.0100209	0.0136911	0.023007
Efhc1	0.0180834	0.0254385	0.0301746	0.0225638	0.0240813	0.00180034	0.0241249	0.00594165	0.0164727	0.00767493	0.00985467	0.00991155	0.00549822	0.0104916	0.00548281	0.0170783	0.0116971	0.00432749	0.00868485	0.00948973	0.0242475	0.0257027	0.032466	0.0455839	0.0178854	0.010989	0.00775449	0.00597182	0.0133697	0.0118222	0.0105882	0.0137942	0.0200722	0	0.0148009	0.0149815	0.0106542	0.034591	0.0138331	0.0168716	0.0211614	0.0143568	0.0184591	0.0227689	0.0251234	0.019057	0.0180285	0.0316796	0.0242099
Tram2	0.129337	0.211484	0.279494	0.228917	0.194175	0.322741	0.914342	0.685873	0.689118	0.655372	0.149814	0.201234	0.368572	0.20341	0.255871	0.104404	0.386906	0.372014	0.382312	0.409299	0.181168	0.274425	0.284937	0.226579	0.215386	0.363777	0.616774	0.66433	0.693289	0.647642	0.412188	1.07513	1.09851	0.510234	0.675913	0.203024	0.279941	0.379911	0.364037	0.251568	0.114826	0.18033	0.172425	0.222173	0.174153	0.210303	0.295111	0.369771	0.341684
Gm28287	0	0	0	0	0	0	0	0	0.000810958	0.000565611	0	0.000682473	0	0	0	0	0	0	0	0	0	0	0	0	0	0.000876758	0.00075949	0.00210472	0	0	0	0	0.00427389	0	0	0	0	0	0	0	0	0	0	0	0	0	0	0	0
Tmem14a	0.10278	0.187228	0.156607	0.113178	0.136888	0.11017	0.0958716	0.10244	0.0938827	0.0789435	0.0890941	0.0876705	0.115004	0.0804063	0.0947537	0.0622146	0.104575	0.0973486	0.0742006	0.0752394	0.100734	0.0989411	0.0720088	0.0558277	0.0894826	0.0797756	0.0894226	0.08575	0.0758598	0.0875264	0.0548359	0.0645484	0.0459338	0.0188599	0.087118	0.0756443	0.0843604	0.0781364	0.123317	0.0904484	0.0634578	0.0611327	0.0866742	0.0649799	0.0640511	0.0710213	0.0839772	0.137225	0.137664
Gsta3	0.00310569	0.00340562	0.0192646	0.00405507	0.0102177	0.012385	0.0118258	0.0141017	0.00146399	0.0119069	0.113413	0.0362986	0.104579	0.0893016	0.0442095	0.0269508	0.0117195	0.015221	0.0145584	0.0165131	0.0239795	0.0524632	0.101321	0.212284	0.156889	0.120222	0.0372486	0.0576039	0.0217761	0.0292829	0.007967	0.00863984	0.0155208	0.0276158	0	0.0121021	0	0.026448	0.0139181	0.0303402	0.0139819	0.0257159	0.103105	0.105799	0.0823919	0.0122466	0.0194122	0.0493622	0.0989176
Gm28836	0	0	0	0	0	0	0	0	0	0	0	0	0	0	0	0	0	0	0.000685925	0	0	0.00391859	0	0	0	0	0	0	0	0	0	0	0	0	0	0	0	0	0	0	0	0	0	0	0	0	0	0	0
Khdc1a	0.0246345	0.00210078	0	0	0	0	0	0	0	0	0	0	0	0	0	0	0	0	0.000638252	0	0	0.00432233	0	0	0	0	0	0	0	0	0	0	0	0	0.0194003	0	0	0.00451448	0	0	0	0	0	0	0	0	0	0	0
Khdc1c	0.000930278	0	0	0	0	0	0	0.0008495	0	0	0	0	0	0	0	0	0	0.00108345	0	0	0	0	0	0	0	0	0	0.000815488	0	0	0	0	0	0	0	0	0	0	0	0	0	0	0	0	0	0	0	0	0
Khdc1b	0.006486	0.0031804	0	0	0	0	0.000850749	0	0.000673654	0.00119674	0.00122005	0	0	0	0	0	0	0.000663787	0.00124417	0.000720624	0.00260095	0	0	0	0	0	0	0.00419245	0	0.00107311	0	0.0102672	0.0104517	0.0110585	0	0.00774305	0	0.0406303	0	0.00217214	0	0	0	0	0	0.00123633	0	0	0
Kcnq5	0.0268842	0.0197003	0.0276793	0.0248352	0.0288745	0.0823422	0.121038	0.245285	0.285903	0.366365	0.0136217	0.0503486	0.07822	0.0798616	0.0644758	0.0669341	0.234161	0.200647	0.322403	0.375282	0.00464379	0.00345975	0.0088274	0.000577324	0.00428876	0.0531075	0.0835072	0.11651	0.183687	0.157072	0.0476378	0.104549	0.225888	0.517526	0.458368	0.0150441	0.00961782	0.0390021	0.0289213	0.0365017	0	0.00145009	0.00173877	0.00678071	0.00357119	0.00373856	0.00604986	0.0059082	0.00278386
Gm26580	0	0.0103708	0.000940902	0	0.00375187	0	0.0192409	0.0256511	0.0170662	0.0146172	0	0.00082206	0.00168418	0	0.00286205	0	0.021282	0.012985	0.0109506	0.0160269	0.00171333	0	0	0	0.0011428	0	0.010818	0.0174125	0.00854063	0.00873853	0	0.0607145	0.120677	0.0930618	0.0541786	0	0	0	0.0108117	0.00294026	0	0	0	0	0	0	0	0.00714646	0
Rims1	0.0105372	0.0203454	0.0122923	0.00279098	0.00210738	0.0166718	0.0664405	0.0596308	0.0742638	0.0538471	0.000505301	0.00455572	0.0047395	0	0.00143605	0	0.0788359	0.0504974	0.0455257	0.0627153	0.00405898	0	0	0	0.000777619	0.0036478	0.0224785	0.0152316	0.0203607	0.0161747	0.0110885	0.0545438	0.0727453	0.0553532	0.0189267	0.00137036	0.00755822	0.00332018	0.00498133	0.00627863	0.00120102	0.000663608	0	0	0.000902018	0.00218886	0	0	0
4933415F23Rik	0	0	0	0	0	0	0	0	0	0	0	0	0	0	0	0	0	0	0	0	0	0	0	0	0	0	0	0	0	0	0	0	0	0	0	0	0	0	0	0	0	0	0	0	0	0	0	0	0
Gm27028	0	0.00235471	0.000870328	0	0	0	0	0	0	0	0	0	0.00233348	0.00290067	0	0	0	0	0	0	0	0	0	0	0	0	0	0	0	0	0	0	0	0	0	0	0	0	0	0	0	0	0	0.00169533	0	0	0	0	0.00273707
Gm29107	0.0478369	0.00393477	0.00464834	0.0254366	0.0214772	0.0148455	0.0086327	0.0178956	0.0338999	0.0460453	0.0149556	0.00496775	0.00795519	0.0302216	0.0181605	0.029353	0.0076721	0.0122939	0.0172385	0.0166298	0.0227193	0.00403421	0.00494146	0.0268956	0.013617	0.0175338	0.0167154	0.00798145	0.0284399	0.0187715	0.0379827	0.0281159	0.0265056	0.0142363	0.0227094	0.0343658	0.00522847	0.00395637	0.0347598	0.00521453	0.012247	0.0095375	0.00139758	0.0200807	0.00495464	0.0310676	0.00702345	0.0061512	0.0361734
Ogfrl1	0.189415	0.147122	0.140279	0.147698	0.160737	0.322393	0.203423	0.157549	0.235446	0.27901	0.169316	0.174661	0.135817	0.145948	0.229151	0.206579	0.148768	0.201794	0.174867	0.305104	0.140176	0.158406	0.0982103	0.137691	0.114693	0.237139	0.250859	0.195728	0.230992	0.271381	0.107933	0.110181	0.101001	0.0102386	0.16994	0.177567	0.183561	0.231688	0.148769	0.19091	0.19569	0.0987271	0.107097	0.0786995	0.127821	0.144282	0.0753401	0.0940507	0.0899732
Gm28822	0	0	0	0	0	0	0	0	0	0	0	0	0	0	0	0	0	0	0	0	0	0	0	0	0	0	0	0	0	0	0	0	0	0	0	0	0	0	0	0	0	0	0	0	0	0	0	0	0
B3gat2	0.0133647	0.0606261	0.0365696	0.0197027	0.025531	0.0113889	0.0507269	0.0241331	0.0272895	0.0212241	0.00897911	0.0388949	0.0275854	0.0198613	0.0100536	0.0103002	0.0298816	0.0232134	0.0168434	0.0159257	0.00973354	0.0474512	0.0271717	0.0380687	0.0176299	0.00828269	0.0358437	0.0177998	0.0159742	0.0141083	0.0458036	0.185072	0.0748756	0	0.0959695	0.00845022	0.0304828	0.0238856	0.030669	0.0190042	0.00348945	0.0165026	0.0151943	0.0207704	0.00755927	0.0121452	0.0249698	0.0256845	0.0208
Smap1	1.46079	1.46896	1.28238	1.3605	1.39112	1.11175	1.25048	1.05194	1.32125	1.43776	0.994107	1.06732	1.06373	0.924335	1.12601	1.2844	1.33772	1.15871	1.34059	1.38178	1.34649	1.12046	1.20246	1.28452	1.38661	0.94301	1.12063	1.08025	1.13321	1.21038	0.632054	0.51248	0.56865	0.320902	0.704626	1.28529	1.20375	1.20457	0.933891	1.10983	1.1255	1.33396	1.1153	1.22419	1.17943	1.32703	1.47376	1.16418	1.22394
Sdhaf4	0.340253	0.166106	0.211709	0.308901	0.332477	0.471668	0.265359	0.243018	0.349315	0.38616	0.581159	0.388349	0.318872	0.522366	0.631299	0.460496	0.22644	0.215848	0.328337	0.368404	0.277269	0.267822	0.15535	0.240277	0.307233	0.493178	0.336703	0.290722	0.448136	0.473417	0.160324	0.164064	0.0617053	0.0962627	0.2055	0.332401	0.148615	0.252565	0.279402	0.377456	0.314023	0.177388	0.187581	0.219692	0.306444	0.266753	0.121262	0.179718	0.220865
Fam135a	0.191187	0.155826	0.180272	0.22978	0.148061	0.324144	0.203292	0.139078	0.162747	0.208405	0.277417	0.230081	0.275584	0.20854	0.264647	0.144863	0.344138	0.185536	0.225575	0.268086	0.275861	0.221868	0.202511	0.279673	0.191974	0.217541	0.144264	0.118279	0.141817	0.170088	0.242411	0.333349	0.294003	0.317754	0.231094	0.259058	0.174974	0.195851	0.267835	0.163655	0.18225	0.150919	0.149147	0.204234	0.14987	0.256958	0.186292	0.18134	0.224861
Col9a1	0.00211558	0.0127262	0.00411644	0	0	0	0	0.00138341	0.0110331	0.0070408	0.000670044	0	0	0	0	0	0	0.00200529	0.00198831	0.0053226	0	0	0	0	0	0	0	0.000749663	0	0.000667111	0	0	0	0	0.0134153	0.0020393	0	0	0	0.00102801	0	0	0	0	0.00102154	0	0.00178136	0.00843573	0
Col19a1	0	0	0	0	0	0	0	0	0	0	0	0	0	0	0	0	0	0.000469163	0	0	0	0	0	0	0	0	0	0	0.000881675	0	0	0	0	0	0	0	0	0	0	0	0	0	0	0	0	0.00119325	0	0	0
Lmbrd1	0.290505	0.246953	0.229039	0.339108	0.373127	0.250925	0.169818	0.188626	0.295636	0.363227	0.245176	0.246934	0.284941	0.297671	0.263203	0.330522	0.209261	0.206529	0.374861	0.41252	0.261493	0.240122	0.300024	0.334867	0.410843	0.204195	0.125269	0.133634	0.189975	0.197658	0.340434	0.304749	0.327269	0.246385	0.35443	0.384763	0.280344	0.238243	0.28842	0.419201	0.25856	0.149883	0.154393	0.226384	0.257487	0.284775	0.211676	0.195037	0.282433
Gm28237	0	0	0	0	0	0	0	0	0	0	0	0	0	0	0	0	0	0	0	0	0	0	0	0	0	0	0	0	0	0	0	0	0	0	0	0	0	0	0	0	0	0	0	0	0	0	0	0	0
Gm29414	0	0	0	0	0	0	0	0	0	0	0	0	0	0	0	0	0	0	0	0	0	0	0	0	0	0	0	0	0	0	0	0	0	0	0	0	0	0	0	0	0	0	0	0	0	0	0	0	0
Adgrb3	0	0	0	0	0	0	0	0	0	0	0.00316987	0.00421737	0.0100754	0.0110623	0.00339159	0	0.00944565	0.00258461	0.00243256	0.00113961	0.00186772	0	0	0	0	0.0015069	0.00439805	0.00378263	0.00272796	0.00183328	0	0	0	0	0.0266339	0.00178017	0	0	0	0	0.00151102	0	0	0	0	0	0	0	0
4931408C20Rik	0	0	0	0	0	0	0	0	0	0	0	0	0	0	0	0	0	0	0	0	0	0	0	0	0	0	0	0	0	0	0	0	0	0	0	0	0	0	0	0	0	0	0	0	0	0	0	0	0
Gm5524	0	0	0	0	0	0	0	0	0	0	0	0	0	0	0	0	0	0	0	0	0	0	0	0	0	0	0	0	0	0	0.00684603	0	0	0	0	0.00173086	0	0	0	0	0	0	0	0	0	0.00117488	0	0	0
Gm597	0	0	0	0	0	0	0	0	0	0	0	0	0	0	0	0	0	0	0	0	0	0	0	0	0	0	0	0	0	0	0	0	0	0	0	0	0	0	0	0	0	0	0	0	0	0	0	0	0
Gm9898	0	0	0.00198639	0.00116248	0	0	0	0	0	0	0	0	0	0	0	0	0	0	0	0	0	0	0	0	0	0	0	0	0	0	0	0	0	0	0	0	0	0	0	0	0	0	0	0	0	0	0	0	0
Phf3	1.15315	1.26623	1.26447	1.18523	1.08782	1.87624	2.0269	1.8123	1.80197	1.9876	1.86886	2.18251	2.25233	1.84315	2.0611	1.97256	2.11926	1.61001	1.58749	1.60059	1.01834	1.25764	1.29559	1.37782	1.13791	1.74158	1.81978	1.56052	1.40728	1.73176	2.79678	3.57127	3.0802	2.01158	3.0435	1.38392	1.35833	1.28856	1.42358	1.17327	1.03324	1.00468	1.13101	0.985779	0.976125	1.18071	1.21249	1.18237	1.09037
Ptp4a1	1.11797	1.3082	1.26072	1.19269	1.249	1.01111	0.937055	0.655977	0.927852	0.959573	0.745104	0.731553	0.737296	0.818556	0.817077	0.996765	0.92765	0.809569	1.07449	0.935901	1.18337	1.30523	1.11525	1.54413	0.959338	0.874929	0.746834	0.70458	0.906166	0.836999	0.855306	0.930945	0.531449	1.0794	0.465289	1.61981	2.08529	1.78758	1.86178	1.38573	1.30115	1.33036	1.31537	1.37366	1.10154	1.82435	2.03162	1.74212	2.55237
Gm29669	0	0	0	0	0	0	0	0	0	0	0	0	0	0	0	0	0	0	0	0	0	0	0	0	0	0	0	0	0	0	0	0	0	0.0170851	0	0	0	0	0	0	0	0	0	0	0	0	0	0	0
Gm28644	0	0	0	0	0	0	0	0	0	0	0	0	0	0	0	0	0	0	0	0	0	0	0	0	0	0	0	0	0	0	0	0	0	0	0	0	0	0	0	0	0	0	0	0	0	0	0	0	0
4931428L18Rik	0	0	0	0	0	0	0	0	0	0	0	0	0	0	0	0	0	0	0	0	0.00260095	0	0	0	0	0	0	0	0	0	0	0	0	0	0	0	0	0	0	0	0	0	0	0	0	0	0	0	0
Gm29128	0	0	0	0.00158381	0	0	0	0	0	0	0	0	0	0	0	0	0	0	0	0	0	0	0	0	0	0	0	0	0	0	0	0	0	0	0	0	0	0	0	0	0	0	0	0	0	0	0	0	0
Lgsn	0	0	0	0	0	0	0	0	0	0	0	0	0	0	0	0	0	0	0	0	0	0	0	0	0	0	0	0	0	0	0	0	0	0	0	0	0	0	0	0	0	0	0	0	0	0	0	0	0
Pih1d3	0	0	0	0	0	0	0	0	0	0	0	0	0	0	0	0	0	0	0	0	0	0	0	0	0	0	0	0	0	0	0	0	0	0	0	0	0	0	0	0	0	0	0	0	0	0	0	0	0
Khdrbs2	0.0011093	0	0.000986819	0	0.000606243	0.0761167	0.0774788	0.0517539	0.0618104	0.0644893	0.175217	0.18989	0.183215	0.115607	0.127928	0.0803857	0.164903	0.054749	0.10329	0.114578	0	0	0	0	0	0.0845284	0.0535967	0.0231807	0.0402108	0.029818	0.187322	0.198104	0.105248	0.0786625	0.0598006	0.00760808	0.00640975	0	0	0	0.00196745	0.00177245	0.00569309	0	0.00133252	0.00247563	0.00125911	0	0
Gm5415	0	0	0	0	0	0	0	0.000568275	0	0.000384734	0	0	0	0.00450671	0	0	0	0	0	0.00131113	0	0	0	0	0	0	0	0	0	0	0.00872296	0	0.00512551	0	0	0	0	0	0	0	0	0	0	0	0	0	0	0	0
Gm37724	0	0	0	0.000602537	0	0	0.00116538	0.000427146	0	0.000539753	0.00110753	0.00132604	0	0	0.00158157	0	0	0	0.00054929	0.00109616	0	0	0	0	0.000602381	0.000897797	0	0.000497206	0	0	0	0	0.00801046	0	0	0	0	0	0	0.00212409	0	0	0	0.00519812	0	0	0	0	0.00306058
Gm37591	0	0	0	0	0	0	0	0	0	0	0	0	0	0	0	0	0	0	0	0	0	0	0	0	0	0	0	0	0	0	0	0	0	0	0	0	0	0	0	0	0	0	0	0	0	0	0	0	0
Prim2	0.072982	0.0748329	0.0647902	0.0626057	0.061291	0.0852311	0.0956122	0.0800296	0.0665065	0.0814208	0.0855947	0.0696625	0.0695724	0.0953582	0.100589	0.0473028	0.0781185	0.0751918	0.108955	0.0899533	0.0694818	0.079328	0.0994518	0.0777832	0.116381	0.252958	0.221472	0.223725	0.253563	0.238551	0.147234	0.154829	0.112889	0.163248	0.105889	0.0985357	0.0647994	0.10617	0.0835056	0.0725634	0.0875385	0.0759962	0.0664687	0.061696	0.0650111	0.0898323	0.0691337	0.0497358	0.0782487
Rab23	0.16515	0.122398	0.120326	0.157063	0.196087	0.150406	0.0987343	0.0832831	0.082496	0.120452	0.162423	0.156134	0.124533	0.113541	0.109024	0.177849	0.0998506	0.0898104	0.105964	0.131815	0.132706	0.141513	0.0933531	0.128614	0.171019	0.157513	0.110287	0.0921781	0.124278	0.1496	0.138239	0.191807	0.134049	0.0769679	0.250463	0.122349	0.115634	0.0480786	0.121844	0.229694	0.155022	0.0843222	0.0931677	0.101869	0.146521	0.142768	0.0938674	0.084839	0.0968022
Bag2	0.330591	0.279122	0.175843	0.282806	0.314195	0.340637	0.322544	0.307506	0.397399	0.365406	0.493021	0.416415	0.40329	0.475297	0.498906	0.297885	0.427434	0.270157	0.314917	0.409752	0.172463	0.113872	0.118148	0.123072	0.212649	0.482761	0.430699	0.381363	0.540346	0.568591	0.375682	0.313903	0.235122	0.239594	0.264487	0.199495	0.176168	0.183303	0.158076	0.25735	0.187943	0.129685	0.130934	0.12023	0.154179	0.16468	0.149085	0.13491	0.178834
Zfp451	0.531431	0.717368	0.556059	0.471927	0.416004	0.660082	0.874135	0.902886	0.826851	0.782578	0.969411	1.1505	0.860435	0.944021	0.9119	0.958614	0.684576	0.939641	0.858883	0.904356	0.623574	0.65775	0.783463	0.645526	0.588377	0.795775	0.85943	0.687258	0.693308	0.633651	1.0279	1.21591	1.05675	1.07505	1.1114	0.720439	0.808529	0.679818	0.704679	0.530202	0.674812	0.658894	0.703183	0.655378	0.567722	0.670593	0.685473	0.532836	0.551408
Bend6	0	0.00347924	0	0.000813997	0.000879457	0.00316101	0.00271481	0.00264215	0.00318661	0.00336587	0.00924935	0.00438657	0	0.0031523	0.00435992	0	0	0.000835991	0.00419269	0.00653995	0.00214631	0	0.00649809	0	0	0.00063882	0.00226608	0.00360332	0.00570703	0.00491759	0.00617097	0	0.00253637	0	0	0.00180276	0	0	0	0	0.00274235	0.000750246	0.00112989	0	0	0.00236315	0.00459226	0	0
Dst	3.28975	3.86526	3.42128	2.96631	2.94628	1.11388	1.98477	2.33152	1.92673	1.79229	0.764195	1.43002	1.95824	1.27955	1.06387	1.29	2.72009	2.93683	2.32874	2.51359	1.15609	1.22395	1.10296	1.30085	0.948678	0.694952	1.24214	1.55397	1.48237	1.29955	1.93822	3.51295	4.17001	4.53056	2.55449	1.19614	1.72483	1.83151	2.11631	1.55082	0.495761	0.434331	0.412847	0.53135	0.371051	1.61784	1.95778	1.81241	1.85694
Gm37958	0	0	0	0	0	0	0	0	0	0	0	0	0	0	0	0	0	0	0	0	0	0	0	0	0	0	0	0	0	0	0	0	0	0	0	0	0	0	0	0	0	0	0	0	0	0	0	0	0
Gm37233	0.015115	0.0225564	0.0294637	0.0182809	0.0172431	0.0159725	0.0036219	0.0101838	0.0166427	0.0174689	0.0134459	0.00208471	0.00702677	0.0177813	0.0182366	0	0	0.0130255	0.0175882	0.025965	0.0247063	0.0172506	0.0269593	0.0443895	0.0231578	0.00448358	0.0171361	0.0073994	0.0100572	0.0179717	0	0.0344264	0.0189893	0.0346614	0.0539403	0.0346671	0.00355664	0.0342329	0.0579507	0.0280577	0.0452038	0.0157971	0.0285321	0.0099939	0.0292931	0.0232052	0.0117155	0.00979154	0.00586082
Ccdc115	0.162712	0.106089	0.102212	0.13391	0.216037	0.164384	0.147942	0.170331	0.228995	0.20683	0.170188	0.121836	0.130523	0.197131	0.215165	0.27998	0.146928	0.173845	0.201742	0.279627	0.147713	0.12208	0.112451	0.127867	0.199146	0.17408	0.147036	0.16809	0.20256	0.245769	0.0790043	0.144333	0.0984494	0.060866	0.159473	0.173803	0.121301	0.0948667	0.0833099	0.186717	0.172204	0.146433	0.116372	0.165723	0.263661	0.132014	0.0877637	0.097723	0.13875
Gm28306	0	0	0	0	0	0	0	0	0	0	0	0	0	0	0	0	0	0	0	0	0.00195053	0.00400769	0	0	0	0	0.00165091	0	0	0	0	0	0	0	0	0	0	0	0	0	0	0	0	0	0.00113377	0	0	0	0
Imp4	0.179168	0.201877	0.173879	0.18989	0.233486	0.459441	0.444823	0.554314	0.522906	0.520945	0.397844	0.379513	0.434539	0.370003	0.432586	0.363402	0.423783	0.488018	0.398007	0.47968	0.197051	0.210647	0.198972	0.238726	0.261179	0.504625	0.536127	0.621291	0.565612	0.591801	0.392302	0.420919	0.179825	0.205022	0.349641	0.167768	0.237293	0.230714	0.214897	0.29225	0.274403	0.308181	0.3393	0.286101	0.371357	0.220265	0.234323	0.205509	0.214959
Ptpn18	0.0144365	0.0230413	0.0124959	0.0124019	0.00836234	0.0202503	0.0288974	0.0439098	0.0185932	0.0222034	0.0168537	0.0225175	0.0386352	0.0228017	0.0269319	0.0144932	0.0621341	0.0366559	0.0228806	0.0404628	0.0291213	0.021769	0.0360813	0.0134363	0.0299035	0.0205006	0.0438054	0.0454107	0.024206	0.0268414	0.0185561	0.0610766	0.0569961	0.0332614	0.0193378	0.0170829	0.00650026	0.031095	0.058387	0.0209095	0.0176735	0.0576986	0.0682179	0.0526783	0.0195964	0.00854664	0.0159618	0.0422849	0.0314482
4930568A12Rik	0	0	0	0	0	0	0.00291625	0	0.00155059	0	0	0	0	0	0	0	0	0.000437669	0	0	0	0	0	0	0	0	0	0.000623104	0	0	0	0	0	0	0	0	0	0	0	0	0	0	0	0	0	0	0	0	0
Prss39	0	0	0	0	0	0	0	0	0	0	0	0	0	0	0	0	0	0	0.000886537	0	0	0	0	0	0	0	0	0	0	0	0	0	0	0	0	0	0	0	0	0	0	0	0	0.00199357	0	0	0	0	0
Cfc1	0	0	0	0	0	0	0	0	0	0	0	0.000922872	0	0	0	0	0	0	0.00215004	0	0	0	0	0	0	0	0	0.00109843	0	0	0	0	0	0	0	0	0	0	0	0	0	0	0	0	0	0	0	0	0
Prss40	0	0	0	0	0	0	0	0	0	0	0	0	0	0	0	0	0	0	0	0	0	0	0	0	0	0	0	0.000861746	0	0	0	0	0	0	0	0	0	0	0	0	0	0	0	0	0	0	0	0	0
1700101I19Rik	0	0	0	0	0	0	0	0	0	0	0	0	0	0	0	0	0	0	0	0	0	0	0	0	0	0	0	0	0	0	0	0	0	0	0	0	0	0	0	0	0	0	0	0	0	0	0	0	0
Amer3	0	0	0	0	0	0	0	0	0	0	0	0	0	0	0	0	0	0	0	0	0	0	0	0	0	0	0	0	0	0	0	0	0	0	0	0	0	0	0	0	0	0	0	0	0	0	0	0	0
Arhgef4	0.0129377	0.00357619	0.00588647	0.0133463	0.0121587	0.00431282	0.0235355	0.0159427	0.0071386	0.0137705	0.0177896	0.0114753	0.0154146	0.0222857	0.0165606	0.031152	0	0.00776035	0.0169729	0.00784911	0.0331164	0.0160247	0.00835745	0.0175887	0.0158346	0.00619513	0.0111826	0.00947373	0.00962728	0.0133734	0.0282474	0.0654295	0.0565369	0.0264475	0.117708	0.0184283	0.00796685	0.00844294	0.0242224	0.0192409	0.00610228	0.0134871	0.00921233	0.0151353	0.0104663	0.00325751	0.01355	0.0159945	0.020854
Gm38336	0.00696577	0.00581082	0.00291229	0.00576184	0.00508512	0.00927478	0.0131056	0.0101014	0.0135578	0.00719203	0.0129301	0.00673877	0.0167781	0.0132189	0.00938496	0.0325933	0	0.0108937	0.0239154	0.00958921	0.00589809	0.00617165	0.01552	0.0165432	0.00107784	0.00459277	0.00549068	0.00737906	0.0157507	0.00385324	0.0141572	0.0639019	0.0577298	0.0796776	0	0.0156101	0.00185158	0.00267964	0.01464	0.00408759	0.0143289	0.00388618	0.0123256	0.0144517	0.00299522	0.00278994	0.00171665	0	0.00535466
Fam168b	0.545118	0.505034	0.37008	0.355214	0.448241	0.492149	0.573072	0.490916	0.445762	0.507962	0.498907	0.613118	0.64142	0.549161	0.462842	0.742666	0.594609	0.646301	0.565584	0.566958	0.484082	0.518141	0.470298	0.408561	0.486775	0.495339	0.506858	0.462096	0.442243	0.461752	0.783489	0.805189	0.646715	0.423225	0.524499	0.561688	0.482704	0.503451	0.440819	0.413772	0.402902	0.441491	0.465231	0.385263	0.425636	0.496323	0.380392	0.452705	0.407552
Plekhb2	0.0105512	0.0168476	0.0448495	0.033991	0.0243305	0.0678243	0.0506717	0.0430526	0.0774242	0.0838987	0.0378434	0.06919	0.100823	0.0558175	0.048005	0.0735412	0.101264	0.0841	0.0841269	0.0811259	0	0	0.00352381	0.00489851	0.000479215	0.0587601	0.0584904	0.055713	0.0760353	0.0623362	0.0192655	0.0559962	0.0544259	0.0115337	0.0139856	0.00577233	0.00554602	0.0114674	0.0228343	0.0159881	0.00520969	0.00194121	0.00640394	0.00495375	0.00173949	0.0058358	0.0043881	0	0
Gm37068	0	0	0	0	0	0	0	0	0	0	0	0	0	0	0	0	0	0	0	0	0	0	0	0	0	0	0	0	0	0	0	0	0	0	0	0	0	0	0	0	0	0	0	0	0	0	0	0	0
Gm28415	0	0	0	0	0	0	0	0	0	0	0	0	0	0	0	0	0	0	0	0	0	0	0	0	0	0	0	0	0	0	0	0	0	0	0	0	0	0	0	0	0	0	0	0	0	0	0	0	0
1110002O04Rik	0.0214396	0.00838096	0.0160912	0.026696	0.00979408	0	0	0	0	0	0	0	0	0	0	0	0	0	0	0	0.00381509	0.00754929	0	0.00490817	0	0	0	0	0	0	0	0	0	0	0	0	0	0	0.0113789	0	0.00468291	0	0	0.00251145	0	0	0	0	0
Gm37146	0	0	0	0	0	0	0	0	0	0	0	0	0	0	0	0	0	0	0	0	0	0	0	0	0	0	0	0	0	0	0	0	0	0	0	0	0	0	0	0	0	0	0	0	0	0	0	0	0
Gm33222	0	0	0	0	0	0	0	0	0	0	0	0	0	0	0	0	0	0	0	0	0	0	0	0	0	0	0	0	0	0	0	0	0	0	0	0	0	0	0	0	0	0	0	0	0	0	0	0	0
4930535G08Rik	0	0	0	0	0	0	0	0	0	0	0	0	0	0	0	0	0	0	0	0	0	0	0	0	0	0	0	0	0	0	0	0	0	0	0	0	0	0	0	0	0	0	0	0	0	0	0	0	0
Hs6st1	0.125943	0.134469	0.13091	0.134387	0.109222	0.114424	0.149739	0.169001	0.135667	0.166803	0.118497	0.178046	0.193271	0.164372	0.221426	0.225763	0.256427	0.183234	0.168024	0.232095	0.119237	0.113276	0.130812	0.166778	0.177522	0.120485	0.144811	0.133312	0.121519	0.16672	0.20956	0.300031	0.284069	0.15959	0.0905034	0.112067	0.151301	0.132252	0.0931209	0.103912	0.122622	0.102346	0.092683	0.100771	0.100177	0.124483	0.112324	0.138885	0.185834
Gm37335	0	0.00164538	0	0	0.000945535	0	0.000867291	0	0	0	0	0.000682947	0.00209882	0	0.00183821	0	0	0.000749028	0.000741295	0	0	0	0	0	0	0.000924987	0	0	0	0	0	0	0.00926825	0	0	0	0	0.00339519	0	0	0.000815512	0	0	0.00537687	0	0.00136224	0	0	0
Gm33280	0	0.00125042	0	0	0	0.00193442	0.00418043	0.00299416	0.00181846	0.00235857	0.000598225	0.000720942	0	0.00202352	0	0	0	0.00118318	0.00147717	0.000897346	0.00165529	0.00314624	0	0	0.00146567	0.000964612	0.000462049	0.00619329	0.00144581	0.000664406	0.023078	0.0185674	0	0	0	0.002753	0	0.00396337	0	0.00301167	0	0.00247881	0.00175144	0.00236611	0	0.00335792	0	0	0
Uggt1	0.245998	0.266806	0.260209	0.187791	0.237384	0.591344	0.523306	0.450315	0.500126	0.503616	0.312034	0.337656	0.338409	0.286597	0.34868	0.302117	0.350958	0.402843	0.531577	0.514334	0.29268	0.330069	0.273105	0.23138	0.282993	0.411996	0.489822	0.437024	0.467983	0.488206	0.51757	0.803785	0.932715	0.470325	0.716568	0.257774	0.218888	0.247038	0.20265	0.281537	0.244679	0.239292	0.223044	0.223828	0.254389	0.273767	0.335296	0.236167	0.239504
Neurl3	0.00186148	0.000680901	0	0.00640158	0.00182921	0	0.00111875	0	0.00345179	0.0024726	0.000474402	0.00574237	0.00253537	0	0.00154418	0	0.0058133	0.00188393	0.00526596	0.00242778	0.00698784	0	0.0315427	0.0233688	0.00551243	0.00543577	0.00468935	0.0025557	0.00332716	0.000921702	0.00563453	0.0202693	0.00339451	0	0	0.00222554	0.00399224	0.0600742	0.0225531	0	0.00356197	0.0138662	0.018527	0.0083289	0	0.00446414	0.00466844	0.0180027	0.00158067
Arid5a	0.211233	0.388897	0.314348	0.345572	0.108675	0.0206567	0.0369277	0.0456531	0.0497054	0.018876	0.0183262	0.051932	0.0907899	0.034162	0.00750222	0.164321	0.213727	0.115712	0.12848	0.0414779	0.20883	0.392813	0.389946	0.444624	0.106086	0.0134351	0.0290379	0.037822	0.0289165	0.0100095	0.0854406	0.222377	0.159054	0.0766596	0.0119979	0.198908	0.455252	0.365555	0.380674	0.119032	0.153799	0.226772	0.360581	0.313638	0.0559111	0.222227	0.444832	0.384016	0.468809
4930403P22Rik	0.0195949	0.0271277	0.0280403	0.029354	0.00857025	0.00389607	0.0245078	0.00627247	0.00612729	0.0130854	0.00591385	0.0168992	0.0123968	0.0175387	0.00907242	0.0134304	0.015544	0.0077466	0.0182153	0.0118541	0.0296991	0.0698158	0.0426364	0.0276886	0.00601873	0.0138785	0.00852749	0.00459798	0.0125152	0.0148645	0.0218733	0.0979728	0.0611739	0	0.0720836	0.0248639	0.0360597	0.0558952	0.0481235	0.0107012	0.0218979	0.0264851	0.0316497	0.0328398	0.00982415	0.0222053	0.0235205	0.0272496	0.0216467
Kansl3	0.409166	0.52562	0.450724	0.372016	0.335442	0.506902	0.671811	0.628178	0.48733	0.502322	0.531478	0.764849	0.890944	0.528999	0.620125	0.62884	0.716744	0.595256	0.499629	0.484263	0.345631	0.39768	0.506225	0.461027	0.46312	0.488482	0.655722	0.581168	0.445408	0.491434	1.0517	1.80567	1.33965	0.745302	0.813893	0.380157	0.468081	0.543048	0.462846	0.36452	0.355804	0.376595	0.451052	0.293691	0.308594	0.398449	0.469815	0.425762	0.338548
Fer1l5	0	0	0.00184589	0	0.00119028	0	0.00748405	0.000808338	0.000738194	0.000526039	0	0	0	0	0	0	0	0	0	0	0	0	0	0	0	0	0	0	0	0	0	0	0.00509489	0	0.0296819	0	0	0	0.00607347	0	0.00325652	0	0	0	0	0	0	0	0
Lman2l	0.243522	0.246331	0.262654	0.211441	0.266106	0.213204	0.2904	0.26981	0.221092	0.269775	0.269896	0.32947	0.396635	0.259251	0.349493	0.279388	0.376878	0.27177	0.195554	0.305984	0.211667	0.161401	0.171011	0.189885	0.237011	0.244243	0.24878	0.260816	0.186938	0.287178	0.369747	0.520034	0.535253	0.32391	0.472717	0.253484	0.27025	0.291125	0.217588	0.325147	0.185348	0.173028	0.16321	0.108676	0.179762	0.192352	0.193711	0.13322	0.100134
Cnnm4	0.0373424	0.0569293	0.0172655	0.0429148	0.0290835	0.0387515	0.0305317	0.0344169	0.028271	0.056166	0.0279176	0.0172139	0.0100723	0.031731	0.0261796	0.122525	0.0451261	0.0511326	0.0546204	0.0731654	0.0546042	0.0269654	0.0212145	0.0440918	0.0509759	0.0180647	0.0221698	0.0230489	0.0356715	0.0350315	0.103603	0.0160838	0.0488135	0.0511703	0.0679367	0.0469396	0.0091433	0.0388339	0.0376755	0.0410749	0.0456724	0.0100144	0.0270243	0.0131226	0.0310727	0.0408954	0.0469733	0.0195047	0.0402387
Cnnm3	0.112125	0.115722	0.110741	0.129331	0.0948166	0.141964	0.188845	0.182033	0.170487	0.170313	0.184925	0.209924	0.247866	0.196013	0.23287	0.130182	0.193632	0.158201	0.132262	0.16742	0.0771357	0.0995788	0.141858	0.120392	0.130947	0.213892	0.209293	0.208735	0.217911	0.217628	0.295439	0.390928	0.320021	0.142752	0.257907	0.109294	0.136667	0.15848	0.175346	0.187741	0.0720144	0.0915433	0.0993562	0.0715183	0.0978529	0.0857672	0.127957	0.0819515	0.0990018
Gm38033	0.00498617	0.0119324	0.00145149	0.0015792	0.00163857	0.00187274	0.00775383	0.00224149	0.00261054	0.00371383	0.00126974	0.00228964	0	0.0025558	0.00127274	0	0	0.00114989	0.00159416	0.000624446	0.00505118	0	0.00415395	0.00262816	0.00326477	0.00168163	0	0.0019421	0.000940505	0.00276097	0	0	0.00478691	0	0	0.00572852	0.00789541	0	0.00619125	0	0.00160003	0.00399099	0.00180503	0.00320085	0.00636527	0.00381923	0.00143304	0	0.0104816
Ankrd23	0.00814715	0.00352322	0.00763998	0	0.00251127	0.0085436	0.00460677	0.0102856	0.00780774	0.0058994	0.00505874	0.00908529	0.00516947	0.00912195	0.00911362	0	0	0.00365027	0.0011572	0.00380072	0.00332104	0	0.00253067	0.00950213	0	0.00462559	0.0100922	0.00564011	0.00566767	0.00583939	0.00578541	0.0525081	0.00659909	0	0.0138767	0.00384599	0.00179908	0.00462403	0.0032114	0.00787754	0.00196011	0.00259488	0.00230328	0.00493291	0.000807854	0.00290312	0.00538488	0.00325988	0
Gm42417	0.00699174	0.000531265	0.00406399	0.00242467	0.00283255	0.00379219	0.00795103	0.00281934	0.00536167	0.00257426	0.00485694	0.0084972	0.00729062	0.0117535	0.00472865	0	0.00546443	0.00104889	0.00163503	0.0077502	0.00256177	0	0	0.00754447	0.00452167	0	0.00658129	0.0108029	0.00598669	0.00464697	0.00891834	0	0.00230201	0	0	0.00880463	0.00173322	0	0.00622972	0.00211383	0	0.00818346	0.00429011	0.00370384	0	0.00204922	0.00104762	0.00670707	0
Ankrd39	0.226474	0.197854	0.202493	0.152567	0.145866	0.299947	0.295922	0.266943	0.240946	0.27428	0.267402	0.264269	0.310531	0.245996	0.30841	0.138584	0.258788	0.147454	0.13861	0.144739	0.229962	0.161534	0.179129	0.249152	0.22031	0.258292	0.252625	0.293151	0.259256	0.270678	0.397017	0.452091	0.272834	0.236521	0.215811	0.183275	0.20361	0.271455	0.18601	0.213107	0.174533	0.129606	0.175713	0.169127	0.179152	0.161621	0.133295	0.164276	0.130505
Sema4c	0.168839	0.169159	0.122963	0.146341	0.155129	0.145465	0.144296	0.110258	0.0952929	0.133791	0.122041	0.138614	0.15886	0.145597	0.154643	0.158562	0.0870202	0.0944383	0.0979178	0.116902	0.189455	0.155998	0.237029	0.212881	0.1697	0.107805	0.10906	0.104371	0.0964027	0.128189	0.122415	0.194594	0.193259	0.0827382	0.160173	0.198252	0.204242	0.266449	0.168872	0.182267	0.116572	0.120345	0.119805	0.140509	0.129593	0.131043	0.113576	0.179828	0.137292
Fam178b	0.0177843	0.0326887	0.0527808	0.0500352	0.0545123	0.00583325	0.0215924	0.0138269	0.00577782	0.0101693	0.00791148	0.0122333	0.00664858	0	0.0111	0	0.00926091	0.00241752	0	0.0027343	0.0286112	0.0428206	0.0575988	0.0276708	0.0394927	0.00806679	0.0205997	0.0300074	0.0244083	0.0172727	0	0.0110553	0.0194082	0	0	0.0163948	0.0213942	0.0549533	0.0207676	0.0201824	0.0248331	0.0375203	0.055754	0.0543317	0.0463301	0.0225216	0.0301936	0.0441355	0.0393172
Cox5b	3.48658	3.06062	3.1632	2.91292	3.39828	4.05636	4.11873	4.38641	3.66856	4.07122	3.4269	3.08835	3.08622	2.68537	3.03876	3.40524	3.37216	3.51375	3.09308	3.62934	2.4673	2.2719	2.46381	1.86646	2.57018	3.90164	4.45645	5.00715	4.2602	4.56474	1.06568	1.41886	1.44965	1.04917	1.24725	2.36818	2.31672	2.44534	1.76352	2.27512	3.16933	3.14236	3.09036	3.20282	3.36749	2.73826	2.62956	2.53684	2.15
Actr1b	0.423752	0.331235	0.322578	0.275257	0.327002	0.371627	0.384235	0.350256	0.377458	0.330269	0.354508	0.389718	0.421667	0.341539	0.310196	0.319398	0.339974	0.388311	0.394219	0.396662	0.360375	0.356875	0.272252	0.287103	0.263193	0.378063	0.378817	0.406944	0.422101	0.35822	0.465781	0.43256	0.284247	0.192886	0.291067	0.377943	0.343789	0.344067	0.243246	0.263832	0.350095	0.312669	0.303849	0.256106	0.306825	0.340643	0.394835	0.383082	0.306767
4933424G06Rik	0	0.00191931	0.00204877	0	0	0	0	0.000513266	0.000902444	0.0013668	0	0	0	0.00216073	0.00121498	0	0	0	0	0.000432105	0.010958	0	0	0	0	0	0	0.000372201	0	0	0	0	0	0	0	0.00170964	0	0	0	0	0.00316983	0	0.00137549	0	0	0	0.00355581	0	0.00249419
Gm33533	0	0	0	0	0	0	0	0	0	0	0	0	0	0	0	0	0	0	0	0	0	0	0	0	0	0	0	0	0	0	0	0	0	0	0	0	0	0	0	0	0	0	0	0	0	0	0	0	0
Zap70	0	0	0	0	0	0.0040094	0	0	0	0	0	0	0	0	0	0	0	0.00041406	0	0	0	0	0	0	0	0	0	0.000688282	0	0	0	0	0	0	0	0	0	0	0	0	0	0	0	0	0	0	0	0	0
Tmem131	0.441497	0.339271	0.442012	0.394855	0.33442	0.49518	0.32555	0.255004	0.376887	0.422585	0.457861	0.368189	0.325856	0.432491	0.429948	0.384826	0.332963	0.258201	0.357118	0.374426	0.477155	0.411634	0.389582	0.450189	0.460268	0.405554	0.295126	0.258574	0.334109	0.353243	0.408983	0.41937	0.544576	0.453604	0.500925	0.46645	0.410755	0.485781	0.513246	0.488467	0.476503	0.368498	0.400326	0.376029	0.455133	0.460437	0.377669	0.480796	0.467226
Vwa3b	0.00310857	0.00362492	0.00755805	0.00636513	0.000927304	0	0	0.00140326	0	0	0.00142853	0	0.00205497	0	0	0	0	0.000935038	0.00132356	0.00235773	0	0.00599568	0.00363957	0.00492232	0.00605356	0.00211013	0.00123437	0	0	0	0	0	0	0.0137971	0	0	0.00361029	0.0110499	0	0.00226623	0.00758664	0.0025389	0.00137549	0.00333544	0.00161905	0.00201383	0	0.00318103	0
Gm37020	0	0	0	0	0	0	0	0	0	0	0	0	0	0	0	0	0	0	0	0	0	0	0	0	0	0	0	0	0	0	0	0	0	0	0	0	0	0	0	0	0	0	0	0	0	0	0	0	0
Cnga3	0	0	0	0	0	0	0	0	0	0	0	0	0	0	0	0	0	0	0	0.000647844	0	0	0	0	0	0	0	0	0	0	0	0	0	0	0	0	0	0	0	0	0	0	0	0	0	0	0	0	0
Inpp4a	0.225135	0.110613	0.0841369	0.120773	0.0794338	0.13617	0.0527335	0.0562275	0.0913774	0.088365	0.0906366	0.0741716	0.0774215	0.0941408	0.0843863	0.173748	0.129553	0.0608225	0.125071	0.0921902	0.0980565	0.0707225	0.0475116	0.116984	0.0557865	0.0914702	0.0543528	0.0580463	0.0485847	0.0646494	0.112648	0.118337	0.0856553	0.299956	0.203922	0.166933	0.0919887	0.0964344	0.175998	0.128235	0.07048	0.0379936	0.0357109	0.0638281	0.0350081	0.107334	0.055197	0.0464945	0.0760104
4930439A04Rik	0	0	0	0	0	0	0	0	0	0	0	0	0	0	0	0	0	0	0	0	0	0	0	0	0	0	0	0	0	0	0	0	0	0	0	0	0	0	0	0	0	0	0	0	0	0	0	0	0
Coa5	0.149228	0.0983965	0.0972347	0.14666	0.128016	0.206479	0.195777	0.192535	0.230719	0.221641	0.212588	0.223585	0.235141	0.181705	0.200877	0.126828	0.269455	0.202655	0.24774	0.248231	0.119805	0.108341	0.129454	0.11907	0.150116	0.185549	0.169816	0.223958	0.192365	0.197965	0.277732	0.118214	0.159705	0.169442	0.135328	0.155331	0.139905	0.102263	0.139672	0.179774	0.136692	0.0845407	0.103563	0.144661	0.166383	0.137625	0.110066	0.0986372	0.154888
Unc50	0.381534	0.132233	0.148605	0.334286	0.490344	0.395515	0.204082	0.196927	0.463292	0.660433	0.445934	0.215941	0.238167	0.423975	0.649479	0.354223	0.179795	0.192938	0.414638	0.588457	0.4012	0.17936	0.149385	0.301837	0.630802	0.440589	0.213031	0.224609	0.456636	0.640235	0.281723	0.147536	0.158255	0.180075	0.512579	0.457441	0.205296	0.116488	0.403039	0.600325	0.351801	0.151463	0.153618	0.29832	0.439276	0.367262	0.163133	0.176779	0.365545
Mgat4a	0.0391046	0.0481841	0.023331	0.0309887	0.0119901	0.0194507	0.0291884	0.00518337	0.000542192	0.0179532	0.00683177	0.0010766	0.0120067	0.00552604	0.00788459	0.0603297	0.0121937	0.0183495	0.00854661	0.0104007	0.00947875	0.00873231	0.0305783	0.0208205	0.010675	0.00670799	0.0112045	0.00955268	0.00802009	0.013559	0.0212067	0.0160392	0.0280439	0.056373	0.0230467	0.0851665	0.113181	0.107067	0.150424	0.147792	0.0147874	0.0133272	0.0102311	0.0184079	0.00882852	0.0168909	0.0375981	0.0295585	0.0135802
2010300C02Rik	0	0	0.00140647	0	0	0	0.00501134	0	0	0.00078125	0.00260013	0.00176825	0.00432645	0	0.00383202	0	0	0.00189976	0.00195605	0.00170933	0.00175882	0	0	0	0	0.00206947	0.000825542	0.00184836	0.00192295	0.00164489	0	0	0	0	0	0	0.0103213	0	0	0	0	0	0	0	0	0	0	0	0
4930556I23Rik	0	0	0	0	0	0	0	0	0	0	0	0	0	0	0	0	0	0	0	0	0	0	0	0	0	0	0	0	0	0	0	0	0	0	0	0	0	0	0	0	0	0	0	0	0	0	0	0	0
Tsga10	0.0544392	0.0642192	0.0484818	0.0909423	0.0613066	0.0221413	0.0404264	0.0273047	0.039143	0.0501043	0.0283627	0.0169947	0.0213007	0.0315298	0.0268022	0.057947	0.0595824	0.0434355	0.0667435	0.0517712	0.0724462	0.0853395	0.0663384	0.0911929	0.0968295	0.0207024	0.0225795	0.0127539	0.0202681	0.0197182	0.0156031	0.0594685	0.0324129	0.0211182	0.0287436	0.084912	0.0571341	0.0701212	0.0542574	0.0911465	0.064977	0.0523402	0.0548581	0.0584831	0.0496368	0.0656299	0.0679092	0.0553937	0.0792606
Gm26805	0	0	0	0	0	0	0	0	0.00109702	0	0	0	0	0	0	0	0	0	0	0.00112113	0	0	0	0	0	0	0.000771811	0	0	0	0	0	0	0	0	0	0	0	0	0	0	0	0	0.00454033	0.00259199	0	0	0	0
Lipt1	0.0138435	0.0165848	0.0221428	0.0302785	0.0323989	0.0430823	0.0388757	0.0406803	0.0543755	0.0424706	0.046878	0.0306895	0.051434	0.0352806	0.0656577	0	0.0268273	0.026537	0.0295702	0.0411538	0.0124648	0.0257384	0.0189735	0.0281533	0.0206882	0.0317767	0.03355	0.0313091	0.0316161	0.0408579	0.00509512	0.0100568	0.0334934	0.0162443	0.0593704	0.0105253	0.00215483	0.0111131	0.0304512	0.0217871	0.0226189	0.00922368	0.0240883	0.0244729	0.0274053	0.014502	0.0216799	0.0209751	0.0185829
Mitd1	0.0969937	0.103004	0.0855708	0.0842584	0.129478	0.111478	0.124929	0.136168	0.162982	0.182596	0.17491	0.127807	0.140135	0.179063	0.21133	0.0836431	0.0812965	0.125249	0.166505	0.20288	0.128944	0.123307	0.136536	0.147516	0.178718	0.163619	0.152102	0.175304	0.189781	0.224479	0.119	0.0723137	0.0581577	0.0601433	0.153193	0.116602	0.1244	0.152723	0.158815	0.184079	0.113729	0.0966784	0.140996	0.121373	0.212054	0.0935111	0.0835928	0.0956298	0.108632
Mrpl30	1.4423	1.62929	1.8803	1.74052	1.54858	1.56336	2.0857	2.53995	1.80163	1.91192	1.48793	1.83218	1.80323	1.44551	1.55876	1.41204	2.09941	2.15724	1.64352	1.52732	1.4328	1.55194	2.0242	1.47791	1.57805	1.5572	2.05377	2.36797	1.85087	1.84004	0.472681	0.507941	0.682844	0.476594	0.499842	1.22873	1.42813	1.73053	1.67062	1.42999	1.58708	1.83998	2.14293	1.85416	1.82153	1.44952	1.63569	1.77149	1.61804
Lyg2	0	0	0	0	0	0	0	0	0	0	0	0	0	0	0	0	0	0	0	0	0	0	0	0	0	0	0	0	0	0	0	0	0	0	0	0	0	0	0	0	0	0	0	0	0	0	0	0	0
Gm15457	0	0	0	0	0	0	0	0	0	0	0	0	0	0	0	0	0	0	0	0	0	0	0	0	0	0	0.00112358	0.000511449	0	0	0	0	0	0	0	0	0	0	0	0	0	0	0	0	0	0	0	0	0
Lyg1	0	0	0	0	0	0	0	0	0	0	0.000591141	0	0.00183284	0	0	0	0	0	0	0	0	0	0	0	0	0	0	0	0	0	0	0	0	0	0	0	0	0	0	0	0	0	0	0	0	0	0	0	0
Txndc9	0.905766	0.729001	0.863134	0.732067	0.877887	0.914862	0.84953	0.998391	0.826249	0.972544	1.08396	0.979154	0.997503	0.919769	1.03334	0.895512	0.935697	0.98571	0.898591	0.876309	0.865838	0.738453	0.801138	0.74908	0.860425	0.937043	0.875278	0.941041	0.857114	0.851939	0.579343	0.757855	0.740152	0.447861	1.01812	0.793778	0.654223	0.90682	0.681805	0.836218	0.841183	0.785409	0.832683	0.804741	0.873575	0.783645	0.700319	0.795032	0.719533
Eif5b	2.28002	2.13979	1.76856	1.81623	2.16848	2.1305	1.94734	1.86269	1.83675	2.20332	2.45361	2.17338	2.17953	1.82824	2.4072	2.43326	1.83472	2.17044	2.06482	2.60986	2.08281	1.8753	1.84257	1.74879	2.05825	2.50392	2.15659	2.00446	1.80959	2.38581	1.74773	2.20881	1.76414	1.57562	1.92002	1.99376	2.07093	1.84406	1.70303	2.08884	1.91543	1.81815	1.78689	1.61862	2.06642	1.92527	2.12064	1.76458	1.74495
Rev1	0.251599	0.238786	0.232314	0.207501	0.209585	0.390002	0.436954	0.230791	0.297296	0.314418	0.426409	0.415739	0.463576	0.420742	0.421393	0.292539	0.381892	0.218561	0.258181	0.239812	0.222757	0.274637	0.194717	0.310346	0.184502	0.5038	0.402195	0.334007	0.433429	0.404703	0.721742	0.811032	0.429565	0.318303	0.415778	0.246458	0.286657	0.266553	0.186446	0.240685	0.195953	0.259845	0.193796	0.203169	0.198223	0.248823	0.27284	0.178377	0.226313
Gm5099	0	0	0	0	0	0	0	0	0	0	0	0	0	0	0	0	0	0.000825306	0	0	0	0	0	0	0	0	0	0	0	0	0	0	0.0146453	0	0	0.00120193	0	0	0.00839732	0	0	0	0	0.00454033	0	0	0	0	0
Aff3	0.299854	0.376893	0.398811	0.206636	0.230129	0.658523	0.772525	1.13461	0.568023	0.68199	0.815708	1.20959	0.951761	0.71411	0.724703	0.69693	0.827706	0.618458	0.31903	0.460256	0.319155	0.2781	0.360453	0.319755	0.225073	0.667854	0.757707	0.612717	0.516484	0.551107	0.86227	1.19367	0.978157	0.51271	0.586736	0.491421	0.530512	0.512866	0.346179	0.395401	0.522277	0.500673	0.59522	0.467458	0.447473	0.335642	0.337304	0.387251	0.267635
Gm16150	0	0.00201529	0.00288381	0	0	0	0.00912226	0.00432727	0.00135628	0.00362893	0.00223767	0.00707935	0.00860908	0.0044725	0	0.0121471	0	0	0.00123836	0.000408005	0	0.00166649	0	0	0.00110281	0.00188257	0.00604672	0.00388194	0	0.00189834	0	0.0215866	0.0146036	0	0.00413641	0	0	0.00480305	0	0.00194396	0	0.00289516	0.00286126	0	0	0	0.00567496	0	0
Gm16151	0	0	0	0	0.000797714	0.00156084	0	0.000959446	0	0.00105428	0	0.000972654	0	0	0	0	0	0.000355485	0	0.000703026	0	0	0	0	0	0	0	0	0	0	0	0.0101741	0	0	0	0	0	0	0	0	0.000890234	0	0	0	0	0	0	0	0
Gm16152	0.0958217	0.298478	0.130866	0.103391	0.0953941	0.13202	0.483185	0.600541	0.241621	0.153753	0.191119	0.458579	0.503595	0.292842	0.209233	0.205972	0.532581	0.338706	0.135089	0.0908546	0.133324	0.21128	0.232208	0.165647	0.0867047	0.148997	0.437642	0.36758	0.201009	0.136095	0.510644	1.66222	1.66418	0.201556	0.654591	0.231495	0.450545	0.352672	0.155319	0.174134	0.188407	0.266156	0.315761	0.241192	0.11675	0.102877	0.220361	0.143244	0.122367
Lonrf2	0.0324342	0.0135092	0.0186382	0.0103554	0.023695	0.00605825	0.00702656	0.00261163	0.00172474	0.00100412	0.00793255	0.00888582	0.0152694	0.00186145	0.00494228	0.0227978	0	0.00103702	0	0.00444225	0.0352296	0.0161847	0.00641099	0	0.0146126	0.018995	0.0115493	0.00197526	0.00780187	0.00841181	0.0203814	0	0.00523688	0.0112479	0	0.0246467	0.0328845	0.00919761	0.00668893	0.0272383	0.0319292	0.0346197	0.0457669	0.0179071	0.0318048	0.0255953	0.0222686	0.00201585	0.00555089
Chst10	0.0118287	0.0045312	0.00255038	0.00288762	0.00510201	0.0369818	0.0105579	0.00730758	0.00546137	0.0176965	0.0344511	0.014002	0.0123713	0.0300487	0.0567389	0.0327014	0	0.00289243	0.00947582	0.0105658	0.00928816	0.00876197	0.00785442	0.00695943	0.0018923	0.0340335	0.0195939	0.00483611	0.0116018	0.0239657	0.0371164	0.0274296	0.00310633	0.0475833	0.011207	0.0124581	0.024443	0.0236842	0.0123475	0.0197353	0.0125046	0.0137291	0.00779701	0.00659822	0.00841516	0.00725713	0.00777732	0	0.00212693
Gm37707	0	0	0	0	0	0	0	0	0	0	0	0	0	0	0	0	0	0	0	0	0	0	0	0	0	0	0	0	0	0	0	0	0	0	0	0	0	0	0	0	0	0	0	0	0	0	0	0	0
Nms	0	0	0	0	0	0	0	0	0	0	0	0	0	0	0	0	0	0	0	0	0	0	0	0	0	0	0	0	0	0	0	0	0	0	0	0	0	0	0	0	0	0	0	0	0	0	0	0	0
Pdcl3	0.929247	0.49142	0.472631	1.01702	1.07948	0.677597	0.40272	0.372408	0.744729	0.883243	0.795856	0.533332	0.513774	0.841527	0.950583	0.812842	0.471281	0.459198	0.850153	0.970985	0.560269	0.368097	0.320186	0.654721	0.788342	0.692071	0.357911	0.357261	0.70234	0.762763	0.39494	0.176246	0.159582	0.435274	0.48834	0.571544	0.358171	0.32885	0.726592	0.782741	0.643699	0.30517	0.300227	0.513705	0.698234	0.601506	0.377797	0.284558	0.620353
Gm37821	0	0	0	0	0	0	0	0	0	0	0	0	0	0	0	0	0	0	0	0	0	0	0	0	0	0	0	0	0	0	0	0	0	0	0	0	0	0	0	0	0	0	0	0	0	0	0	0	0
Npas2	0.0373728	0	0.0049538	0.0165883	0.00580887	0.010326	0	0.000485182	0.00276667	0.00127863	0.0161283	0.00277213	0	0.006745	0.00615833	0	0.0135375	0.00263988	0.00120372	0.0029208	0.00647672	0	0	0.011919	0.00108514	0.00621588	0.00147314	0.000677495	0.00116979	0.00124859	0.022723	0.0158428	0	0	0	0.00181405	0.00349703	0.0053751	0	0	0.0016843	0	0.00293331	0.00647759	0.00128375	0.00983898	0.0064314	0	0.00458116
Rpl31	7.31496	9.65565	8.5768	6.83322	8.32443	8.36601	11.7517	11.7723	8.68928	9.34492	8.04715	9.80501	8.06399	7.17672	8.31278	7.12446	10.1027	10.6484	7.79314	8.24315	7.51071	10.2156	8.79538	6.97762	8.09458	8.6601	11.6429	11.0136	9.72493	10.3051	1.79114	2.89591	3.61524	2.61513	3.04314	7.28227	9.15465	8.78403	7.18093	8.46859	9.08587	12.5784	10.7958	9.81109	10.7096	7.95014	10.4439	9.61333	7.52868
Tbc1d8	0.00695497	0.0185004	0.010486	0.00334899	0.00942183	0.16435	0.0595463	0.0494475	0.108659	0.10951	0.251655	0.136353	0.121016	0.152333	0.19715	0.192347	0.116093	0.0608043	0.0860458	0.103751	0.0131767	0.0119053	0.020793	0.0299969	0.0111588	0.271617	0.0898421	0.0924217	0.116243	0.125506	0.3	0.173782	0.0674921	0.153653	0.10773	0.0193913	0.0368621	0.0217109	0.00494306	0.0181282	0.0184741	0.010079	0.00771188	0.0103303	0.00669201	0.0152695	0.00435851	0.0022652	0.00390578
Cnot11	0.188841	0.136152	0.115048	0.139201	0.154579	0.219605	0.179666	0.186981	0.184554	0.245148	0.274861	0.215701	0.215675	0.218345	0.211803	0.182178	0.159426	0.183669	0.22862	0.230898	0.136446	0.137909	0.216439	0.120821	0.187136	0.25458	0.203509	0.197527	0.233962	0.220294	0.165808	0.215565	0.174212	0.184786	0.181728	0.145625	0.0851203	0.154929	0.125005	0.127208	0.164717	0.142453	0.182964	0.179798	0.167685	0.148332	0.117791	0.0852243	0.106797
Rnf149	0.45841	0.410714	0.409277	0.356413	0.326554	0.75978	0.764171	0.769143	0.67774	0.81828	0.8905	0.917693	0.954674	0.882374	1.01173	0.773979	0.662198	0.695949	0.631706	0.775914	0.398937	0.455942	0.47802	0.299957	0.340238	0.85074	0.70906	0.790456	0.736974	0.864398	0.760298	0.778124	0.801753	0.384426	0.764526	0.488664	0.497215	0.436294	0.352818	0.382744	0.437581	0.41587	0.410035	0.403677	0.473059	0.475857	0.475996	0.398974	0.371733
Creg2	0.016242	0.0185086	0.0284235	0.0218316	0.0153952	0.022193	0.0373441	0.0757012	0.036736	0.0268922	0.0419745	0.0630063	0.0529835	0.0457581	0.0453656	0.0454437	0.157777	0.166461	0.103893	0.10407	0.00277577	0	0.00502033	0.00284871	0.00108009	0.0392521	0.0380612	0.0228167	0.0265517	0.0231149	0	0.0576666	0.0648555	0	0.0249343	0.00147058	0.0230336	0.0429371	0.0238143	0.0491174	0.000859356	0	0.00701186	0	0	0.00365487	0.0126272	0.00435587	0
D930019O06Rik	0	0	0	0	0.000552702	0	0	0	0.00070494	0	0.000781479	0.000923594	0	0	0.00201572	0	0	0.000728051	0.00508343	0	0	0	0	0	0	0	0	0.000758391	0	0	0	0	0	0	0	0	0	0	0	0	0	0	0	0	0	0	0	0	0
Rfx8	0.00134293	0	0	0	0	0	0.00135031	0.00135428	0.00453767	0.00198397	0	0.000961786	0	0	0	0	0	0.00458865	0	0.00394367	0.00165188	0	0	0	0	0	0	0.00163158	0	0	0	0	0	0	0	0.0010823	0	0	0	0.00375164	0.00446262	0	0	0	0.00216916	0.0026357	0	0.00332599	0
Gm3646	0	0	0	0	0	0	0	0	0	0	0	0	0	0	0	0	0	0	0.000907358	0	0	0	0	0	0	0	0	0.000879707	0	0	0	0	0	0	0	0	0	0	0	0	0	0	0	0.00153976	0	0	0	0	0
1700066B17Rik	0	0	0	0	0	0.00107976	0.0232121	0.0395353	0.027353	0.0213686	0.013347	0.00752894	0.0133408	0.0278452	0.00896363	0	0.036281	0.0226107	0.0188589	0.0248901	0	0	0.0116477	0.00230164	0	0.00777447	0.008485	0.0210844	0.0103753	0.0155291	0.00989037	0.00658222	0.0355302	0.0164873	0.0363078	0.0011108	0	0.014427	0	0	0.00171671	0.00284702	0.0026956	0	0.00092108	0	0	0	0
Map4k4	1.30717	1.79235	1.55883	1.22457	1.02265	2.09883	3.02438	4.50943	3.28716	3.27064	3.30365	4.12137	4.14983	2.51867	2.42441	2.78288	4.9035	5.9301	4.75653	4.58027	1.74198	1.87465	1.97938	1.71251	1.4338	2.33145	2.50121	2.5907	1.8189	1.80247	4.58639	7.01135	7.56752	4.04624	3.98693	1.94871	1.92447	1.6991	1.52703	1.06035	1.39859	1.38982	1.46774	1.22398	1.17036	1.61148	1.6765	1.66384	1.40394
Il1r2	0.00157201	0.00156101	0.00601336	0.00270957	0	0	0	0.00192723	0	0	0	0	0	0	0	0	0	0.000545026	0	0	0.0023584	0.00509346	0.0133794	0.0176268	0.00526024	0	0.000903761	0.000273036	0	0	0	0	0.00379154	0	0	0.00343186	0	0.0228449	0	0	0.01302	0.016398	0.0289194	0.0137202	0.00642592	0.000892979	0.00300862	0.00450509	0.00139873
Gm16894	0	0	0.00198014	0	0.000356037	0	0	0	0	0.00259747	0	0	0	0	0	0	0	0	0.00192231	0	0.00653049	0	0	0	0.00313452	0	0.000767598	0	0.000809627	0	0	0.00561065	0	0	0	0.00123212	0	0	0	0	0.00302576	0	0.00173814	0	0	0	0	0	0
Il1r1	0.0731045	0.0813438	0.0626179	0.0569085	0.0713216	0.0467854	0.0337868	0.0657535	0.0796028	0.0812568	0.0159655	0.0198657	0.020491	0.0239307	0.0156194	0.0516201	0.0269675	0.0684995	0.128023	0.0993947	0.101042	0.100997	0.150973	0.195843	0.135361	0.0200662	0.0207356	0.0440345	0.0586	0.0513714	0.0195348	0.0235956	0.0354157	0.079854	0.0960791	0.144758	0.118393	0.166253	0.245936	0.173617	0.164305	0.117857	0.171892	0.16968	0.0995695	0.10879	0.152817	0.129384	0.147736
Il1rl2	0.0119573	0.0166305	0.00736781	0.0224985	0.0192631	0	0	0.0035924	0.00334233	0.00482923	0.00118917	0.000427821	0.00842392	0.0100978	0.00517192	0	0	0.0174518	0.0326977	0.0114065	0.0602699	0.0351137	0.0329429	0.0824072	0.0458203	0.0012348	0	0.00442581	0.00335681	0.00212668	0	0.00616356	0.0098949	0.0498471	0.0280553	0.109306	0.0231008	0.0307402	0.0589458	0.063693	0.070661	0.0264511	0.0544217	0.0432866	0.0576458	0.0371947	0.00947986	0.0362584	0.0550005
Il1rl1	0.00856031	0	0	0	0	0	0	0	0	0	0	0	0	0	0	0	0	0	0	0	0.00236408	0	0	0	0.00229043	0	0	0	0	0	0	0	0	0	0	0	0	0	0	0	0	0	0	0	0	0.00533981	0	0	0
Il18r1	0	0	0	0	0	0	0.00517664	0.0132937	0.00259835	0.00432551	0	0	0	0	0	0	0	0	0	0	0	0.00376736	0	0	0	0.00143727	0.00333519	0.0103508	0.00171235	0.00619789	0	0.00888935	0.0196365	0.0244275	0	0	0	0	0	0	0	0	0	0	0	0	0	0	0
Il18rap	0	0	0	0	0	0	0	0	0	0	0	0	0	0	0	0	0	0	0	0	0	0	0	0	0.000978882	0	0	0	0	0.000914707	0	0	0	0	0	0	0	0	0	0	0	0.00104413	0	0	0	0	0	0	0
Gm35801	0	0	0	0	0	0	0	0	0	0	0	0	0	0	0	0	0	0	0	0	0	0	0	0	0	0	0	0	0	0	0	0	0	0	0	0	0	0	0	0	0	0	0	0	0	0	0	0	0
Slc9a4	0	0	0	0	0.000504299	0	0	0	0	0	0	0	0	0	0	0	0	0	0	0	0	0	0.00450284	0	0	0	0	0	0	0	0	0	0	0	0.0034931	0	0	0	0	0	0	0	0.00232116	0	0	0	0	0	0
Slc9a2	0	0	0.00139133	0	0.000526856	0.00527334	0.00197362	0.00892197	0.014104	0.0106998	0.00734478	0.00617107	0.00277055	0.00851233	0.00104872	0	0.0109711	0.00933204	0.00864297	0.0154476	0.00177515	0	0	0	0	0.00564248	0.00218216	0.00541823	0.0125731	0.00731104	0.0100204	0.015421	0.00426239	0.017667	0.0119706	0	0	0	0	0.00249494	0.00102605	0	0	0	0	0	0	0	0
Gm37623	0	0	0	0	0	0	0	0	0	0	0	0	0	0	0	0	0	0	0	0	0	0	0	0	0	0	0	0	0.00100054	0	0.00621322	0	0	0	0	0	0	0	0	0	0	0	0	0	0	0	0	0	0
Gm37915	0	0	0	0	0	0	0	0	0	0	0	0	0	0	0	0	0	0	0.00105611	0.000921275	0	0	0	0	0	0	0	0	0	0	0	0	0	0	0	0	0	0	0	0	0	0	0	0	0	0	0	0	0
Mfsd9	0.0055523	0.00162598	0	0.00296424	0.00857592	0.0164936	0.00651018	0.0308886	0.0235064	0.032363	0.00715457	0.00991744	0.00696565	0.00561839	0.0175399	0	0.0202764	0.0229011	0.014386	0.0257253	0.0125038	0	0.00596415	0.00540249	0.0107326	0.00569908	0.0115305	0.0252896	0.0140723	0.0213657	0.011868	0.0142346	0.0643172	0.0336028	0.0215204	0.00478276	0.00290944	0.0145157	0.00547276	0.0104143	0.00882479	0.00770694	0.00552524	0.00563461	0.00714427	0.00225641	0.00562769	0.0054903	0.00139873
Tmem182	0	0	0	0	0	0	0	0.0256069	0.0146844	0.0143844	0	0	0	0	0	0	0	0.0178133	0.0055044	0.00765791	0	0	0	0.00231259	0	0.000801452	0.00133537	0.0167544	0.0141768	0.00703294	0	0	0.00994406	0	0.015719	0	0	0	0	0	0	0	0	0	0	0.00192325	0	0.0014158	0
4930448I06Rik	0	0	0	0	0	0	0	0	0	0	0	0	0	0	0	0	0	0	0	0	0	0	0	0	0	0	0	0	0	0	0	0	0	0	0	0	0	0	0	0	0	0	0	0	0	0	0	0	0
Gm28634	0	0	0	0	0	0	0	0	0	0	0	0	0	0	0	0	0	0	0	0	0	0	0	0	0	0	0	0	0	0	0	0	0	0	0	0	0	0	0	0	0	0	0	0	0	0	0	0	0
Gm29260	0	0	0	0	0	0	0.0012791	0	0	0.00146477	0	0	0	0	0	0	0	0	0	0	0	0	0	0	0	0	0	0	0	0	0	0	0	0	0	0	0	0	0	0	0	0	0	0	0	0	0	0	0
Gm9915	0	0	0	0	0	0	0	0	0	0	0	0	0	0	0	0	0	0	0	0	0	0	0	0	0	0	0	0	0	0	0	0	0	0	0	0	0	0	0	0	0	0	0	0	0	0	0	0	0
Gm29664	0	0	0	0	0	0	0	0	0	0	0	0	0	0	0	0	0	0	0	0	0	0	0	0	0	0	0	0	0	0	0	0	0	0	0	0	0	0	0	0	0	0	0	0	0	0	0	0	0
Gm28175	0	0	0	0	0	0	0.00772064	0.00109117	0	0.00403831	0	0	0	0	0	0	0	0	0	0	0	0	0	0	0	0.00101972	0.00187705	0.00169854	0.00311709	0.00212086	0	0	0	0	0	0	0	0	0	0	0	0	0	0	0	0	0	0	0
Gm28140	0	0	0	0	0	0	0	0	0	0	0	0	0	0	0	0	0	0	0	0	0	0	0	0	0	0	0	0	0	0	0	0	0	0	0	0	0	0	0	0	0	0	0	0	0	0	0	0	0
Pantr1	0	0	0	0	0	0	0	0	0	0	0	0	0	0	0	0	0	0	0	0	0	0	0	0	0	0	0	0	0	0	0	0	0	0	0	0	0	0	0	0	0	0	0	0	0	0	0	0	0
Pou3f3	0	0	0	0	0	0	0.00476304	0	0	0	0	0	0	0	0	0	0	0	0	0.00155073	0	0	0	0	0	0	0	0	0	0	0	0	0	0	0	0.00356118	0	0	0	0	0	0	0	0	0	0	0	0	0
Dalir	0	0	0	0	0	0	0	0	0	0	0	0	0	0	0	0	0	0	0	0	0	0	0	0	0	0	0	0	0	0	0	0	0	0	0	0	0	0	0	0	0	0	0	0	0	0	0	0	0
Mrps9	0.349588	0.294272	0.443563	0.438575	0.423553	0.57215	0.735603	0.749235	0.648118	0.687857	0.642741	0.618709	0.626936	0.636146	0.629054	0.594355	0.419304	0.610962	0.536593	0.472557	0.390583	0.269348	0.532975	0.398539	0.384253	0.678344	0.755332	0.792551	0.694602	0.694921	0.310574	0.513727	0.391373	0.327593	0.475526	0.371662	0.318302	0.303032	0.317614	0.35704	0.362109	0.340134	0.378986	0.404083	0.397468	0.329791	0.314147	0.367689	0.377733
Gpr45	0.00732615	0.00158547	0.00174505	0.00312998	0.00647758	0.00525865	0.00131826	0.00172484	0.011721	0.00442677	0.000504314	0.00612133	0	0.00337079	0	0.00955335	0	0.00642178	0.0129038	0.0122059	0.0108216	0.0046733	0.00752056	0.0132002	0.00348046	0.00134671	0.000801549	0.00162327	0	0.00177908	0.00707281	0.00859255	0.00529946	0	0	0.00621157	0.00302513	0	0	0.00699059	0.0193294	0.0138066	0.0131253	0.0157748	0.00653055	0.00716361	0.00312525	0.00733355	0.0151522
Tgfbrap1	0.102877	0.0817165	0.0745776	0.0721676	0.112814	0.0791418	0.100746	0.101595	0.126617	0.154007	0.0922509	0.109103	0.166707	0.150976	0.12399	0.241573	0.142805	0.113015	0.121051	0.129595	0.0857798	0.0980977	0.113699	0.103018	0.132044	0.0936244	0.111477	0.0955556	0.0996102	0.137685	0.227727	0.251293	0.245001	0.213057	0.149207	0.12942	0.0810647	0.086306	0.104353	0.116916	0.0964912	0.0540725	0.0667968	0.0834389	0.0880212	0.0839251	0.102264	0.0615843	0.0629768
Gm28782	0	0	0	0	0	0	0	0	0	0	0	0	0	0	0	0	0	0	0	0	0	0	0	0	0	0	0	0	0	0	0	0	0	0	0	0	0	0	0	0	0	0	0	0	0	0	0	0	0
8430432A02Rik	0.00124171	0.0014449	0	0	0.00123507	0.00207447	0	0.00133036	0.00459828	0.00280218	0.00117836	0.00268182	0	0	0.00105653	0	0	0.000726296	0.00336038	0.0048118	0.00308547	0	0	0.00753426	0.00686084	0.0018883	0	0.0036189	0.00656548	0.00155523	0	0.00672029	0.00470164	0.0217124	0.00489254	0	0	0	0.0111347	0.00688999	0.00299347	0.00153549	0	0	0.00190616	0.00210031	0.0027042	0	0.00418684
AI597479	0.0718376	0.0661529	0.0547416	0.0937778	0.0809934	0.0988409	0.100245	0.103655	0.108838	0.116676	0.115725	0.0882781	0.106118	0.102497	0.141138	0.0870789	0.0809366	0.0896694	0.0917901	0.119638	0.0867042	0.0542113	0.0492638	0.0830112	0.0958193	0.120176	0.105853	0.141264	0.145668	0.144386	0.137436	0.0907966	0.107433	0.0755358	0.0662965	0.0753027	0.0925112	0.0801863	0.104248	0.129393	0.0890175	0.070731	0.0673773	0.0630646	0.112986	0.0557989	0.0736834	0.0671197	0.107961
Fhl2	1.7207	1.39345	1.97094	1.7897	1.82303	0.028357	0.0569047	0.149381	0.13268	0.155875	0.037837	0.0678641	0.109022	0.0440008	0.0675283	0.0944369	0.0767185	0.154351	0.142055	0.182539	1.18679	1.06126	1.46701	1.14722	1.2253	0.0348588	0.0413906	0.082866	0.0387928	0.0714049	0.0984571	0.0976822	0.136739	0.128277	0.109982	2.11697	0.956441	1.47331	1.18313	0.969164	1.25884	1.22007	1.72312	1.57448	1.70192	1.11296	0.722924	1.13688	0.879705
Gm29040	0	0	0	0	0	0	0	0	0	0	0	0	0	0	0	0	0	0	0	0.000377634	0	0	0.00370072	0	0.00187084	0	0	0.000875013	0	0	0	0	0	0	0	0.00144699	0.00318606	0.00581694	0	0	0	0	0.00157307	0	0.00511663	0.00121502	0.00153308	0.0050144	0
Nck2	0.265997	0.1239	0.126292	0.17187	0.138093	0.182111	0.0892017	0.0757887	0.10702	0.134477	0.228842	0.12465	0.128288	0.172279	0.197694	0.121699	0.137083	0.100745	0.14161	0.160096	0.22511	0.164278	0.0473473	0.115993	0.135935	0.196699	0.0726687	0.0580815	0.0753376	0.108327	0.194978	0.168509	0.0865744	0.124058	0.114826	0.295153	0.119572	0.147765	0.242939	0.151416	0.135853	0.0967554	0.0630519	0.0970937	0.126254	0.279645	0.130163	0.137158	0.142824
1500015O10Rik	0.408009	0.401806	0.425509	0.399682	0.416216	0.00386312	0.0101049	0.00701915	0.00320508	0.00171272	0.0035222	0.000897106	0	0	0	0.352186	0	0.00445586	0.00133626	0.00531622	0.0512196	0.0361088	0.0299262	0.0477728	0.0367117	0.00364459	0.00515355	0.00517576	0.000976542	0.00864081	0.0286722	0.0126194	0.00920036	0	0.00723804	0.16885	0.133168	0.168341	0.0785617	0.172254	0.0423985	0.0401407	0.0252157	0.0331181	0.0360869	0.0785324	0.0671606	0.118247	0.0493282
Gm29155	0.00132623	0	0	0	0	0	0	0	0	0.00174133	0	0	0	0	0	0.0134304	0	0	0.00234202	0.000691075	0	0.00649289	0	0.00277119	0	0.00132351	0	0.00150874	0.00248321	0.00537009	0	0	0	0.0123679	0	0	0	0	0	0	0.00183475	0.00266711	0	0.00236074	0.000557406	0	0	0	0
Gm29157	0.00559657	0.00185354	0.00368069	0.000618635	0	0	0	0	0	0	0	0	0	0	0	0	0	0	0	0	0	0.00391859	0	0.00242816	0	0	0.00046904	0	0	0.000801917	0	0	0	0	0	0.0034617	0	0	0.00517386	0.00149668	0.000785407	0	0	0	0	0	0.000922688	0	0
Gm29156	0.00118361	0	0	0	0.000860349	0	0	0	0.000743315	0.00209074	0.000613059	0	0	0.00177996	0	0	0	0	0	0.00199374	0	0.00294235	0.00259202	0	0	0.00170987	0.00182837	0.00076098	0.00396388	0.00198216	0	0	0.00572944	0	0	0	0	0	0	0	0	0	0	0	0.00231748	0	0	0	0
Uxs1	0.21924	0.212466	0.124413	0.121443	0.124736	0.365949	0.330615	0.269487	0.296997	0.31563	0.408464	0.349297	0.322417	0.3532	0.370209	0.321484	0.191935	0.258724	0.263193	0.270586	0.145145	0.153549	0.118179	0.0784603	0.156683	0.45555	0.427924	0.39528	0.406051	0.367411	0.398628	0.300093	0.270358	0.114883	0.161298	0.22287	0.214958	0.160983	0.165077	0.207051	0.16866	0.170905	0.147558	0.168624	0.138792	0.205652	0.140009	0.144745	0.138213
Tpp2	0.640626	0.553683	0.38758	0.415558	0.34706	1.00273	0.854178	0.862777	0.953975	0.964394	1.08427	0.958504	0.991815	1.16463	0.974251	1.10791	0.809426	0.814692	0.89558	0.83249	0.687986	0.47608	0.537862	0.511747	0.503235	1.05404	0.905716	0.85402	0.872572	0.946976	1.51678	1.61985	1.31244	1.33969	1.11323	0.735138	0.625801	0.618205	0.547194	0.497247	0.799948	0.638239	0.704962	0.786121	0.607288	0.769124	0.629672	0.611505	0.663452
Mettl21c	0.0105595	0.00712443	0.0137411	0.00580536	0.00165204	0.0266318	0.0508611	0.0483964	0.0230879	0.050123	0.0300064	0.0442153	0.0145583	0.0319251	0.0293134	0.0201733	0.0251442	0.0214339	0.0133636	0.015391	0.00382519	0.012367	0.00692744	0.00541498	0.000978882	0.0247245	0.0375206	0.0323841	0.0322919	0.0285611	0.0702141	0.179367	0.136341	0	0.0573752	0.0140119	0.0159872	0.0218983	0	0.0043546	0.00963354	0.0308727	0.0256464	0.00937502	0.0073302	0.0206335	0.0125576	0.00536871	0.0137043
Gm8251	0.0393825	0.0428118	0.0310815	0.0157099	0.00660582	0.058169	0.10879	0.0355698	0.027739	0.0208808	0.0181833	0.0162331	0.0124526	0.0106948	0.00885596	0.0227978	0	0.0336549	0.0556742	0.0490861	0.0456973	0.0489159	0.0367002	0.0314926	0.00201569	0.0341618	0.0883916	0.0504153	0.0750559	0.0121382	0.065904	0.0292807	0.0808233	0.150165	0.0111422	0.059944	0.0460423	0.0173615	0.0219707	0.00237994	0.0513751	0.0430823	0.053354	0.0894851	0.00678143	0.0412297	0.0407967	0.0249803	0.0293265
Tex30	0.175093	0.156947	0.144195	0.131156	0.150634	0.557521	0.332191	0.465251	0.597425	0.572663	0.54388	0.320219	0.258941	0.398393	0.425463	0.500895	0.339465	0.735643	0.850946	0.753855	0.179908	0.133128	0.141819	0.168865	0.187519	0.72636	0.432735	0.423118	0.608086	0.599861	0.183868	0.133558	0.308507	0.245422	0.355651	0.224147	0.200752	0.190563	0.160368	0.149371	0.194626	0.176184	0.159589	0.172794	0.13955	0.24219	0.191034	0.148966	0.170287
Kdelc1	0.230244	0.153351	0.116327	0.176846	0.19894	0.493814	0.275944	0.218392	0.393543	0.436684	0.336143	0.19632	0.22244	0.380014	0.357778	0.430047	0.260876	0.193435	0.284955	0.368508	0.29699	0.116773	0.106652	0.284699	0.266181	0.380151	0.253182	0.205138	0.420879	0.439658	0.223469	0.220614	0.258451	0.32797	0.390043	0.284497	0.165288	0.119841	0.208786	0.258991	0.274181	0.160437	0.140038	0.281138	0.28546	0.24271	0.184812	0.155294	0.218436
Bivm	0.0547834	0.0310231	0.0444289	0.059027	0.0725193	0.0829882	0.0537663	0.0561025	0.0987963	0.0994739	0.0933987	0.0622483	0.0663763	0.0853417	0.11506	0.0789936	0.0597204	0.0605892	0.0825707	0.110801	0.0633482	0.0422406	0.0413217	0.0578276	0.062356	0.092531	0.058897	0.0579585	0.0960812	0.107323	0.149183	0.0203619	0.0503294	0.0144936	0.0709423	0.0673018	0.0246631	0.0529815	0.0968711	0.0995715	0.0878207	0.0297276	0.0375651	0.0535673	0.0893486	0.0391678	0.0410573	0.0349228	0.0325193
Ercc5	0.210899	0.200951	0.206712	0.227488	0.230952	0.315254	0.209449	0.207782	0.240969	0.226717	0.299366	0.310509	0.274959	0.258899	0.357429	0.239005	0.217643	0.189742	0.259321	0.22981	0.23506	0.261062	0.195546	0.279348	0.231165	0.301768	0.230525	0.2091	0.222102	0.273122	0.268267	0.356189	0.331714	0.454853	0.296593	0.248063	0.232195	0.216432	0.305361	0.266127	0.201065	0.147611	0.214582	0.19778	0.226474	0.198514	0.188365	0.267869	0.202268
Mettl21e	0	0	0	0	0	0	0	0	0	0	0.000550058	0	0	0	0	0	0	0	0	0	0	0	0	0	0.001757	0	0	0	0	0	0	0	0	0	0	0	0	0	0	0	0	0	0	0	0	0.00108919	0	0	0
Gulp1	0.396299	0.315688	0.270116	0.409275	0.335258	0.0149749	0.0149465	0.0346409	0.036643	0.0397661	0.0105685	0.00235245	0.00529019	0.0226375	0.00762959	0.0630995	0.0180785	0.0571219	0.0583111	0.0714756	0.470482	0.280942	0.264546	0.47311	0.298295	0.0117299	0.00917056	0.0180604	0.0236572	0.0222086	0.027377	0.00666607	0.0563842	0.0846374	0.074524	0.540356	0.362285	0.268563	0.388947	0.319375	0.256773	0.165746	0.165289	0.21375	0.180776	0.537656	0.347433	0.306493	0.38352
4930521E06Rik	0	0	0	0	0	0	0	0	0	0	0	0	0	0	0	0	0	0	0	0	0	0	0	0.00213145	0	0	0	0	0	0	0	0	0	0	0	0	0	0	0	0	0	0	0	0	0	0	0	0	0
Col3a1	12.6508	7.15887	7.48468	6.90708	7.09592	0.604642	0.150379	0.0678411	0.0285816	0.121049	0.296914	0.0927902	0.118324	0.0564769	0.0976651	1.07584	0.178408	0.118106	0.0512324	0.110024	19.2156	9.92525	11.2514	10.8409	12.7496	0.222729	0.100754	0.0787303	0.0385064	0.0865552	1.91927	0.685676	0.271461	0.06889	0.453855	12.1198	6.21315	7.33114	6.99887	6.30201	10.6864	9.07849	13.2524	13.4291	18.2738	17.2805	10.2861	15.8827	13.6009
Col5a2	1.34153	0.887356	0.970569	0.749402	0.611778	0.188354	0.0328299	0.0758104	0.0872308	0.106831	0.125562	0.0736586	0.111862	0.0480316	0.0436879	0.390725	0.0979112	0.260663	0.234328	0.197992	1.26014	1.00273	1.07467	1.1551	0.944949	0.0636752	0.0230175	0.0142525	0.0132104	0.0148047	0.338336	0.079411	0.161167	0.0903933	0.167636	1.45901	0.894177	0.967043	0.909289	0.728687	0.821155	0.530731	0.670836	0.883766	0.819994	1.42991	0.92713	1.45595	1.31243
Wdr75	0.283365	0.269652	0.191992	0.207686	0.279388	0.382765	0.438287	0.384035	0.446445	0.403771	0.505224	0.474127	0.364806	0.530227	0.463945	0.272436	0.373348	0.3123	0.343439	0.390566	0.287612	0.273952	0.243989	0.179908	0.305119	0.542165	0.525885	0.487269	0.520105	0.510642	0.285654	0.303626	0.27515	0.172404	0.21377	0.244815	0.264265	0.24486	0.194552	0.33867	0.366181	0.361642	0.323018	0.341815	0.361464	0.279341	0.287999	0.274182	0.234683
Gm5269	0	0.00204073	0	0	0	0	0	0.00333929	0.000523945	0	0.00051865	0.00122455	0.00249151	0	0	0.0170783	0	0.000925114	0.0033447	0	0	0	0	0.00354235	0	0	0	0.000907811	0.000621453	0	0	0	0	0	0	0.00264493	0	0	0	0	0	0	0	0	0	0.000710693	0	0	0
Slc40a1	0.272183	0.230807	0.281836	0.208979	0.282156	0.274051	0.51628	0.741281	0.589155	0.391348	0.98466	1.69263	1.29294	1.21394	1.21227	0.46529	0.756478	1.24775	0.987124	0.958725	0.181689	0.233972	0.328904	0.255642	0.365727	0.626904	0.76097	0.576775	0.372748	0.381088	1.15984	1.76911	1.74316	0.753392	0.939433	0.562213	0.354917	0.425613	0.672443	0.679392	0.0947406	0.0649739	0.10368	0.0837465	0.108377	0.294739	0.260668	0.37324	0.325264
Dnah7b	0.0394702	0.0532605	0.0576131	0.0599382	0.0546879	0.0761175	0.0470079	0.102204	0.108017	0.0967031	0.0815126	0.0728881	0.100035	0.148786	0.119937	0.057663	0.151644	0.105331	0.122118	0.126591	0.059026	0.0440972	0.0955618	0.060102	0.0837109	0.0483999	0.0328964	0.0449214	0.065296	0.0406232	0.150716	0.232286	0.189167	0.302382	0.224092	0.0539102	0.0515881	0.0742121	0.073117	0.0436152	0.0405179	0.0406658	0.0627561	0.0465039	0.0478932	0.0446852	0.0396811	0.0326746	0.0506491
Dnah7c	0	0	0.0025877	0	0	0.00219324	0.0105793	0.0265681	0.00953088	0.0101855	0.00108389	0.00174807	0.00429407	0	0.00186052	0	0	0.00880783	0.00791013	0.0113043	0	0	0	0	0	0.0007398	0.0132211	0.0169331	0.00632312	0.00802742	0	0	0.0146147	0	0.0101186	0	0	0	0	0.003241	0.00239507	0	0.00365473	0.00146841	0.0046792	0.00194786	0.00288255	0	0
Slc39a10	0.24347	0.219067	0.172336	0.128038	0.151366	0.312843	0.359232	0.204709	0.240128	0.223252	0.413253	0.328452	0.305745	0.341612	0.293141	0.4037	0.297096	0.273862	0.337505	0.355567	0.377168	0.299195	0.218888	0.19471	0.192678	0.425077	0.438749	0.319404	0.347787	0.338226	0.263251	0.327292	0.302449	0.276867	0.347658	0.435754	0.405562	0.206565	0.267363	0.261705	0.366984	0.275885	0.288041	0.254721	0.254415	0.284827	0.284416	0.221423	0.194016
Gm28151	0.00690625	0.00664168	0.00249122	0.00393889	0.00203673	0.0163764	0.00376981	0.00185776	0.00857452	0.00564419	0.00629138	0.00382889	0	0.00385175	0.00383319	0	0.0072071	0.0106687	0.0029915	0.0104823	0.00466405	0.0102279	0	0.00588876	0.0037063	0.00586932	0.00133158	0.0018188	0.00166443	0.00352858	0.00450567	0.00557083	0.0186318	0	0	0.0128405	0	0.00478492	0	0.00442038	0.0128876	0.00283207	0.00194231	0.00796733	0.00172716	0.00555142	0.00445472	0	0.00151321
Gm28826	0	0	0	0	0	0	0	0.000513266	0	0	0	0	0	0	0	0	0	0	0	0	0	0	0.00333544	0	0	0	0	0	0	0	0	0	0	0	0	0	0	0	0	0	0	0	0	0	0	0	0	0	0
C230029F24Rik	0	0	0	0	0	0	0	0	0	0	0	0	0	0	0	0	0	0	0	0	0	0	0	0	0	0	0	0	0	0	0	0	0	0	0	0	0	0	0	0	0	0	0	0	0	0	0	0	0
4933411E06Rik	0.00180956	0	0.00632753	0.00499181	0.00135837	0	0	0.000450845	0	0	0.000833098	0.00141975	0	0	0	0	0	0.00125871	0	0	0	0.00491493	0	0	0.0015365	0.000866642	0	0	0	0.000956295	0	0	0.00458877	0	0	0.00246552	0.00883492	0.00945808	0	0	0.00806518	0.00818706	0.00302813	0.00213457	0.00374614	0.00341061	0	0.0014158	0.00276717
Gm29665	0	0	0	0	0	0	0	0	0	0	0	0	0	0	0	0	0	0	0	0	0	0	0	0	0	0	0	0	0	0	0	0	0	0	0	0	0	0	0	0	0	0	0	0	0	0	0	0	0
Gm28321	0	0	0	0	0	0	0	0	0	0	0	0	0	0	0	0	0	0	0	0	0	0	0	0	0	0	0	0	0	0	0	0	0	0	0	0	0	0	0	0	0	0	0	0	0	0	0	0	0
Tmeff2	0.0473725	0.0506014	0.0775128	0.140009	0.170781	0.0129583	0.0169379	0.0230393	0.0185511	0.0371772	0.0107324	0.00594251	0.00636333	0.00345479	0.00350947	0.0167813	0.00743977	0.0667415	0.0899317	0.112151	0.302239	0.206202	0.329551	0.968411	1.02105	0.0108718	0.0136821	0.00636366	0.00367975	0.00670493	0.0124471	0.00615148	0.0342308	0	0.0469818	0.0060843	0.0112465	0.0126438	0.0338255	0.0255018	0.0872434	0.047982	0.0717788	0.119229	0.130061	0.0825661	0.0639112	0.0940781	0.325666
Gm28322	0	0.00140352	0	0.00180889	0.00113156	0	0	0	0	0	0	0	0	0	0	0	0	0	0	0	0	0.00225146	0	0	0	0.000921177	0	0	0	0	0	0	0	0	0	0	0	0	0	0	0.000466318	0.00328001	0.00230195	0.00482293	0.00197044	0	0	0	0
Gm28319	0	0	0	0	0	0	0	0	0	0.000754262	0	0	0	0	0	0	0	0	0	0	0	0	0	0	0	0	0	0	0	0	0	0	0	0	0	0	0	0	0	0	0	0	0	0	0	0	0	0	0
Gm29325	0.00142786	0.00301494	0	0.00659403	0	0	0	0	0	0.000516209	0.000550229	0	0	0	0	0	0	0.00111537	0.00573512	0.000971948	0.0038849	0.00367464	0.0082034	0.0376493	0.0179887	0	0	0.000742445	0	0	0	0	0	0	0.00840204	0	0	0	0	0	0.000951027	0.00121009	0.00266023	0	0.00101628	0.000657982	0.00207692	0.00577943	0.00455926
9330175M20Rik	0	0	0.00182784	0.00462257	0.00479896	0	0	0.00116583	0	0	0	0	0	0.00454691	0	0	0	0	0	0.000386712	0.00206642	0	0	0.0113962	0.00583733	0	0	0	0	0	0	0	0	0	0	0	0	0	0	0	0	0	0	0.00349946	0	0.00124976	0	0	0
Cavin2	2.5078	2.28458	2.42705	3.03874	2.89363	0.356808	0.033552	0.0131476	0.0276587	0.040299	0.239333	0.111772	0.0885345	0.0934434	0.069081	0.596711	0.226571	0.0325388	0.102368	0.079771	1.4501	1.20379	1.47915	1.69577	1.53503	0.114516	0.0368248	0.0257812	0.021311	0.0172086	0.381977	0.158424	0.0731228	0.0137971	0.059946	0.185809	0.0827866	0.0584366	0.139788	0.0691395	0.990456	0.619537	0.860655	0.82777	0.91749	0.808507	0.570093	0.690778	1.08436
1700072G22Rik	0.00337602	0	0	0	0	0	0	0	0	0.00154991	0	0	0	0	0	0	0	0	0.000390616	0	0.00379264	0	0	0	0	0	0	0	0	0	0	0	0	0	0	0.00417635	0.0129901	0	0	0.0011127	0.00332237	0.00424036	0.00330373	0	0.00236862	0.00085741	0.00320133	0	0.0064254
Nabp1	0.116758	0.117784	0.0903325	0.175971	0.105858	0.0325852	0.0702374	0.0435929	0.0951333	0.048386	0.0331385	0.0142334	0.0121708	0.0500355	0.0207875	0.0372443	0.0287076	0.033907	0.0661305	0.0681785	0.170964	0.136241	0.13464	0.317194	0.146078	0.0331055	0.028294	0.0279537	0.0861882	0.0488067	0.0334498	0.179033	0.105223	0.128439	0.127639	0.131171	0.12584	0.130646	0.31406	0.1092	0.130991	0.082608	0.0832086	0.191255	0.102226	0.102686	0.127764	0.0754308	0.188896
Gm17767	0	0	0	0.00183334	0	0	0	0	0	0	0	0	0	0	0	0	0	0	0	0	0	0	0	0	0	0	0	0	0	0	0	0	0	0	0	0	0	0	0	0	0	0	0	0	0	0	0	0	0
Gm28055	0	0	0	0	0	0.00557635	0.0165316	0.000503357	0	0.00243194	0.000719131	0.00101519	0	0	0	0	0	0.000654128	0.000977701	0	0.00154516	0	0	0.0028143	0	0.00107965	0.00538183	0.00200126	0.00229148	0.00502055	0	0.00529821	0	0	0.00872856	0.00141066	0	0	0	0	0.000929054	0	0.00177766	0.00139855	0	0	0	0.00440017	0
Myo1b	0.375702	0.312786	0.306232	0.226023	0.23753	3.81671	2.31418	1.00021	1.29097	1.4681	3.4615	3.74513	2.92121	3.07852	2.7496	2.15663	1.51232	0.624177	0.495465	0.543781	0.608046	0.63797	0.720555	0.528176	0.439274	3.10417	2.74622	1.96775	2.19615	2.22545	3.8658	4.0922	1.68613	1.01616	1.82952	0.605249	0.421161	0.405359	0.413883	0.307731	0.568236	0.497619	0.587819	0.544484	0.485891	0.690185	0.500679	0.606403	0.484374
Stat4	0.00126304	0.00323649	0.00311822	0.00180944	0.000654191	0	0	0.0012224	0	0	0.000614126	0	0.00289175	0.00340699	0.000897293	0	0	0.00240277	0	0	0	0.00528545	0	0.00150489	0.000978882	0	0.0018301	0.000654914	0.0014687	0.00118161	0	0	0	0	0	0	0.0040391	0	0	0	0.000971907	0.00199352	0.00217912	0.00367963	0	0.00120057	0.00301655	0	0.00132261
Gm31812	0.00403896	0.00111749	0.00340965	0	0.000494111	0.00724844	0.00243983	0.00591118	0.0088766	0.0121872	0.00812531	0.00824438	0.00590405	0.0109625	0.0108247	0.0293508	0	0.0096637	0.00945331	0.0118075	0.0119196	0.00400264	0	0.00328	0.00380266	0.00751922	0.00878007	0.0102061	0.0130021	0.0123949	0	0.0136391	0.0234858	0	0	0.0054645	0	0.00630232	0	0.00260729	0.0030562	0.00269708	0.00164211	0.00559649	0.00456678	0.00453113	0	0	0.00764278
Stat1	0.244805	0.342864	0.625368	0.802878	0.751124	0.177154	0.261046	0.166375	0.271241	0.34093	0.13622	0.187026	0.290186	0.260302	0.230087	0.125473	0.19901	0.218647	0.366319	0.351051	0.19171	0.296854	0.868667	0.990436	0.829088	0.135673	0.201053	0.223825	0.205692	0.207969	0.289376	0.63802	0.462913	0.38018	0.211886	0.188739	0.274503	0.543503	0.739415	0.445042	0.166805	0.234836	0.548855	0.623953	0.485752	0.218682	0.324636	0.634259	0.826792
Gls	2.61207	3.40483	3.13284	3.62791	2.89131	4.35044	4.56428	3.44851	4.95893	4.1924	6.55772	5.85539	4.89179	8.3125	5.56205	5.23865	4.3101	4.00996	5.04099	4.14932	2.51905	2.64706	2.36061	3.38337	2.67088	5.65075	4.0654	2.91369	4.48161	3.35884	14.7441	11.6196	7.48455	8.86845	7.48191	2.65736	3.19807	3.16407	4.9777	3.03464	1.81155	1.79439	1.75398	2.76764	1.58272	2.80574	3.39187	2.93072	5.49072
Nab1	0.721337	0.759054	0.822702	0.675389	0.868436	0.207324	0.2085	0.370224	0.317488	0.306408	0.345333	0.49113	0.479768	0.381769	0.309396	0.312262	0.443011	0.546478	0.513799	0.512247	0.454537	0.610724	0.60002	0.500107	0.642869	0.255543	0.220116	0.22244	0.227742	0.21016	0.459616	0.404498	0.435985	0.271241	0.303058	0.407769	0.460199	0.461885	0.399076	0.482989	0.451753	0.499575	0.509344	0.450964	0.457944	0.485038	0.622232	0.608332	0.573659
Gm553	0.00127046	0	0	0.000872405	0	0	0	0	0	0.00121551	0.00114913	0.00234732	0	0	0	0	0	0.000544953	0.00149856	0.000792472	0	0	0	0	0	0	0.00143455	0	0	0	0	0	0	0	0.0130069	0	0	0	0	0	0.00157766	0.00108357	0	0.00249671	0	0.000933571	0	0	0
Gm28178	0	0	0	0	0	0	0	0	0	0	0	0	0	0	0	0	0	0.000492179	0	0	0	0	0	0	0	0	0	0	0	0	0	0	0	0	0	0	0	0	0	0	0	0	0	0	0	0.000925073	0	0	0.0022721
Nemp2	0.0625169	0.0238711	0.0428508	0.0437468	0.0383961	0.0197919	0.0296549	0.0279797	0.0325444	0.0369652	0.024552	0.0453614	0.036255	0.0265198	0.047885	0.0406227	0.0352001	0.0364639	0.0394986	0.0331697	0.0428157	0.0370486	0.0264705	0.028644	0.0546496	0.047052	0.0342594	0.0441038	0.0429304	0.0490736	0.0665705	0.01336	0.05322	0.0530878	0.132973	0.0365589	0.014302	0.0145052	0.0795118	0.0533803	0.0202775	0.0199471	0.022854	0.0419745	0.0498899	0.0292163	0.0148628	0.0264861	0.0204252
Mfsd6	0.0187694	0.0252161	0.0384392	0.0126869	0.0334108	0.0399816	0.0446343	0.104094	0.0714575	0.124287	0.0208802	0.0414143	0.0632636	0.0461632	0.0346054	0.245776	0.127089	0.192541	0.153891	0.171831	0.00698457	0.0159085	0.0335207	0.0216024	0.0220798	0.0167808	0.0180815	0.0363752	0.0270763	0.0323748	0.0688265	0.0655547	0.212098	0.103272	0.0871727	0.0212834	0.0500726	0.0245297	0.0526086	0.0403451	0.00551257	0.00484078	0.00989483	0	0.016603	0.0197919	0.0132398	0.0478422	0.0101214
Inpp1	0.126522	0.121457	0.0860431	0.124714	0.133577	0.115297	0.109725	0.082713	0.0822123	0.0949964	0.0868829	0.114941	0.0850426	0.102892	0.0807751	0.206253	0.141739	0.101301	0.111182	0.112885	0.119948	0.151045	0.119368	0.101249	0.168099	0.111603	0.0993121	0.0800886	0.074569	0.0955819	0.0864619	0.118843	0.0834217	0.101833	0.0806856	0.135666	0.148684	0.16227	0.16379	0.231405	0.124198	0.0974703	0.0677421	0.0674124	0.100414	0.140667	0.127308	0.151123	0.140979
Hibch	0.201673	0.15142	0.149089	0.238402	0.260759	0.228086	0.196067	0.24714	0.357378	0.333282	0.279749	0.17681	0.193783	0.246671	0.325035	0.257355	0.186381	0.217843	0.315372	0.323861	0.184931	0.152386	0.137246	0.1873	0.247528	0.245496	0.205484	0.188101	0.312121	0.297761	0.220165	0.0826902	0.106384	0.0629476	0.140602	0.219431	0.170966	0.158528	0.246992	0.282482	0.230408	0.185025	0.146391	0.207327	0.253399	0.213389	0.138534	0.154002	0.21226
1700019D03Rik	0.0251221	0.0156351	0.0117695	0.0121659	0.0104002	0	0.00517094	0	0	0.00381621	0.00123186	0.000830805	0	0	0	0	0	0.000818087	0.0019365	0.00162831	0.00899747	0.00789789	0.00514567	0.0102401	0.00353097	0.000924372	0.000751517	0.000784068	0	0.00182316	0.00443195	0	0	0	0	0.00727319	0.00349094	0.00395048	0.00432722	0.0128447	0.00465362	0.00290047	0.00580033	0.0092375	0.00585173	0.0103794	0.00325307	0.003348	0.00608219
Mstn	0	0	0	0	0	0	0	0	0	0	0	0	0	0	0	0	0	0	0	0	0	0	0	0	0	0	0	0	0	0	0	0	0	0	0	0	0	0	0	0	0	0	0	0	0	0	0	0	0
1700019A02Rik	0	0	0	0	0	0	0	0	0	0	0	0	0	0	0	0	0	0	0	0	0	0	0	0	0	0	0	0	0	0	0	0	0	0	0	0	0	0	0	0	0	0	0	0	0	0.00109628	0	0	0
Pms1	0.020258	0.0203455	0.0244735	0.0209857	0.0191246	0.0613607	0.0338764	0.0252461	0.034302	0.0266436	0.065783	0.058333	0.060187	0.0585351	0.0776088	0.0706451	0.0572332	0.0268789	0.0346509	0.030744	0.040908	0.0223626	0.0158356	0.0170688	0.0390312	0.0973767	0.0742107	0.0787128	0.0811701	0.0937207	0.0946312	0.0533315	0.0489174	0.0418	0.111218	0.0270943	0.0319357	0.0327356	0.0333734	0.0762293	0.0300425	0.0187373	0.0117376	0.0274812	0.0284473	0.029327	0.00896412	0.0107401	0.0198048
Gm28777	0	0	0	0	0	0	0	0.000724447	0	0	0	0	0	0.00158781	0	0	0	0	0	0	0	0	0	0	0	0.000973688	0	0	0	0.000761285	0	0	0	0	0	0	0	0	0	0	0.00090189	0	0	0.00277452	0	0	0	0.00176705	0
Ormdl1	0.0500992	0.0334712	0.0251516	0.0453549	0.049536	0.193384	0.15376	0.177958	0.17448	0.209644	0.22074	0.223739	0.247631	0.226047	0.268247	0.237635	0.201187	0.18993	0.208495	0.198807	0.0499738	0.0206636	0.0460127	0.0498187	0.0574453	0.286135	0.244628	0.30198	0.228496	0.310922	0.072664	0.0976856	0.0879301	0.0439089	0.118879	0.0505015	0.0555544	0.0439183	0.0436378	0.092713	0.0565169	0.0331821	0.0548352	0.0281292	0.0463104	0.0391063	0.0316686	0.0285942	0.0160714
Gm28778	0	0	0	0	0	0	0	0	0	0	0	0	0	0	0	0	0	0	0	0	0	0	0	0	0	0	0	0	0	0	0	0	0	0	0	0	0	0	0	0	0	0	0	0	0	0	0	0	0
Osgepl1	0.0968799	0.0622318	0.0338769	0.054726	0.0850938	0.126569	0.0972723	0.0850523	0.102769	0.111857	0.125714	0.103943	0.0854995	0.0966986	0.107387	0.0840958	0.088246	0.0786074	0.0806299	0.0876474	0.0710606	0.045686	0.0834345	0.0665725	0.0938413	0.135148	0.0955655	0.129626	0.12183	0.113825	0.0657608	0.0839985	0.0475216	0.0306192	0.0368357	0.105569	0.0676808	0.100137	0.134279	0.0890941	0.0779025	0.0681897	0.0386379	0.078674	0.0887058	0.0706103	0.0474187	0.0432146	0.0518942
Gm28551	0.00941155	0	0.00112176	0.000730236	0.00448412	0.00374092	0.00129451	0.00234632	0.000836853	0.0073936	0.00133057	0	0.00171032	0	0.00127027	0	0	0.00114933	0.000544881	0.00387907	0.00533609	0	0.00929813	0.00233225	0.00570762	0.00163133	0.00258988	0.00290499	0	0.00186742	0.0260877	0	0	0	0	0.00189461	0.00266192	0	0.00555099	0.00486549	0	0.00322917	0	0.00148671	0.00215525	0.00208746	0.00273862	0.0060347	0
Asnsd1	0.131188	0.104736	0.129685	0.103948	0.131903	0.107512	0.0856603	0.160268	0.120275	0.140697	0.140021	0.104579	0.103145	0.0860306	0.177671	0.262324	0.136771	0.142615	0.128704	0.175316	0.206519	0.131351	0.168533	0.12344	0.152105	0.155988	0.145669	0.167682	0.151865	0.189109	0.0355074	0.0747201	0.0500716	0.0543409	0.0725028	0.218367	0.159612	0.145356	0.14804	0.212579	0.214786	0.190958	0.169879	0.172428	0.2156	0.180888	0.142891	0.134612	0.155754
Dnah7a	0.00440888	0.00758529	0.00955673	0.00946306	0.00329511	0.0332473	0.0166385	0.0126744	0.00926419	0.0167213	0.00609947	0.00534724	0.00341427	0.00452711	0.0100254	0	0.00979747	0.00413284	0.0136886	0.0198443	0.0096444	0.00917264	0.0147314	0.00621471	0.00939297	0.00308575	0.00871952	0.00700399	0.00631912	0.00364329	0.00626902	0	0	0.018081	0	0.00176205	0.00173322	0.00302088	0	0	0.00487854	0.00462703	0	0.00779685	0.00592553	0.0124164	0.00168084	0	0.00282914
Stk17b	0.558706	0.363432	0.332472	0.517425	0.445933	0.304926	0.132486	0.139422	0.209977	0.20996	0.163765	0.173873	0.203989	0.195309	0.1835	0.122417	0.136407	0.117388	0.138938	0.168907	0.395496	0.202211	0.216946	0.299975	0.294184	0.109233	0.146592	0.152465	0.183844	0.173057	0.160824	0.140216	0.100581	0.0566852	0.206381	0.207697	0.157858	0.190819	0.244213	0.187952	0.240657	0.115111	0.0964468	0.1611	0.122976	0.340724	0.299938	0.195692	0.283667
Hecw2	0.0857857	0.0697535	0.0541006	0.0576717	0.0400112	0.211259	0.156253	0.152321	0.130423	0.136398	0.417374	0.241555	0.269509	0.350989	0.320097	0.246189	0.140956	0.0897158	0.0652463	0.0870975	0.0559929	0.0728492	0.0846615	0.115321	0.0739054	0.366951	0.223063	0.190904	0.207387	0.191726	0.609751	0.416512	0.233218	0.19025	0.376522	0.109869	0.0789975	0.057024	0.112819	0.0786507	0.0357526	0.0121205	0.0133339	0.0177376	0.024423	0.0658427	0.0374139	0.0197073	0.0415474
Ccdc150	0	0	0	0.00191766	0	0.00171814	0.00439966	0.00469335	0	0.000507949	0.000586034	0.00097555	0.00200152	0.00341857	0.00144359	0	0	0.00184415	0.00130996	0	0	0.00258354	0	0	0	0.00260209	0.00484025	0.00523047	0.00367062	0.00227936	0	0.00677832	0.00545058	0	0	0.00215454	0	0	0	0	0	0	0.00243	0	0.000998956	0	0	0	0
Gtf3c3	0.145728	0.130961	0.103735	0.145058	0.141378	0.211592	0.198071	0.187529	0.216275	0.224044	0.258237	0.259819	0.208517	0.239253	0.268988	0.233624	0.207081	0.170411	0.223817	0.208691	0.122348	0.118964	0.122828	0.142235	0.164584	0.233547	0.179857	0.147909	0.183557	0.204408	0.301624	0.205284	0.156867	0.170627	0.248375	0.189272	0.109503	0.0943562	0.0850279	0.180933	0.125397	0.118631	0.135346	0.111864	0.196145	0.125872	0.142376	0.127989	0.100353
Gm34066	0	0	0	0	0	0	0	0	0	0	0	0	0	0	0	0	0	0	0	0	0	0	0	0	0	0	0	0	0	0	0	0	0	0	0	0	0	0	0	0	0	0	0	0	0	0	0	0	0
Pgap1	0.0529058	0.0810165	0.0530445	0.0631626	0.0370525	0.0433497	0.0147109	0.0167081	0.0234147	0.0308714	0.0335359	0.0384359	0.0404453	0.0323989	0.0367558	0.0783158	0.0503468	0.0220244	0.0414638	0.0236728	0.0552311	0.0676504	0.0436199	0.0576483	0.0472506	0.0241579	0.0363712	0.0314395	0.0204287	0.0327491	0.0471152	0.0331247	0.0476529	0.0586577	0.0635039	0.0699965	0.0439247	0.0326219	0.0663783	0.0785296	0.0508516	0.0319304	0.0475759	0.0286152	0.0449389	0.0436742	0.0291906	0.0325776	0.0442587
Ankrd44	0.0351327	0.0488411	0.0177115	0.0188509	0.015773	0.0248191	0.0399022	0.0455327	0.0554889	0.0514297	0.014588	0.00925898	0.0166311	0.0162482	0.00923859	0.125162	0.031297	0.0902146	0.0679208	0.0790441	0.081058	0.0253216	0.0336762	0.0436586	0.038739	0.0411815	0.0648213	0.0892898	0.0859271	0.0560603	0.0248827	0.0153401	0.111461	0.0580866	0.115551	0.070037	0.0929829	0.0805647	0.0636997	0.0499207	0.0211743	0.00823124	0.0214755	0.0103209	0.0100347	0.0601756	0.0355362	0.0485248	0.0322991
4930444A19Rik	0	0	0	0	0	0	0	0	0	0	0	0	0	0	0	0	0	0	0	0	0	0	0	0	0	0	0	0	0	0	0	0	0	0	0	0	0	0	0	0	0	0	0	0	0	0	0	0	0
Sf3b1	3.20649	4.00473	3.69017	3.5414	2.48024	3.33478	4.04993	3.26385	3.26578	2.63876	3.15352	3.86821	3.9226	3.39524	2.9789	3.85951	3.66551	3.39146	3.50457	2.65532	3.4426	3.69774	4.19954	4.319	2.78608	3.04368	3.66511	3.60412	3.09693	2.68725	5.29354	5.18444	4.22679	3.53693	4.06249	3.88197	5.33592	4.71792	4.35045	2.57536	3.56888	4.0576	3.9875	3.53722	2.59953	3.51354	4.40092	4.03076	4.06273
Coq10b	1.31611	1.9621	1.76073	1.85383	2.51162	0.741864	0.70029	0.681121	0.806883	0.706484	0.513019	0.894033	1.16823	1.2027	0.804791	1.35609	1.41215	0.808264	1.12274	0.786856	1.62987	1.73444	2.22068	2.93629	2.39803	0.56691	0.58729	0.599477	0.621538	0.52144	0.920852	1.34938	1.24875	0.990518	0.990793	2.50972	2.59644	2.28098	3.01999	2.76884	1.79922	1.71815	1.69448	1.9874	1.80747	2.42726	2.20523	2.21756	3.03569
Hspd1	2.54697	2.94161	2.01755	1.8902	2.41225	5.75412	7.41517	5.5009	5.02584	4.49618	5.59161	6.30828	5.06433	5.3747	5.32106	4.24045	5.44704	4.15763	3.46507	4.4879	2.52476	2.49908	1.87059	1.76743	2.4946	8.54724	10.7688	9.28943	9.16643	8.92215	3.00108	3.7586	3.12764	1.67587	3.56569	2.51912	2.99769	2.39253	1.65938	2.24922	4.20535	5.15127	4.42095	4.19335	3.88716	3.1629	3.64391	2.25112	2.21951
Hspe1	4.05594	4.19528	3.51135	3.74397	4.99225	6.52195	8.48025	7.14666	7.04901	7.9167	5.73101	7.06032	5.54954	6.29518	7.04557	4.62377	7.00244	5.55911	5.15363	6.64638	3.91069	4.33944	3.62028	4.08472	5.52628	7.60388	10.6377	9.36763	9.72801	10.107	1.98009	3.07029	2.71219	1.72476	2.68373	3.84739	4.45444	3.82171	3.29441	4.19721	5.25985	6.04577	5.31107	5.95574	6.03624	4.46091	5.04546	4.072	3.8623
Mob4	0.724514	0.652417	0.705398	0.721097	0.866833	0.642063	0.484173	0.527335	0.647463	0.772568	0.740286	0.77352	0.823086	0.818322	0.779055	0.942914	0.633946	0.67815	0.67805	0.821932	0.597397	0.519379	0.579443	0.654979	0.850014	0.586637	0.543023	0.472979	0.485494	0.617759	0.45877	0.60229	0.459217	0.269954	0.624484	0.714079	0.61671	0.690074	0.61106	0.774232	0.643578	0.620196	0.605495	0.657696	0.765172	0.679524	0.621205	0.620759	0.617524
Rftn2	0.108816	0.166585	0.176243	0.194009	0.194834	0.0058651	0.00303233	0.00181938	0.00421079	0.00819915	0.00248667	0.0030538	0.00420712	0	0.00477172	0	0.00944565	0.00773768	0.0104512	0.0114736	0.106846	0.123951	0.217826	0.221507	0.194597	0.0030047	0.00275108	0.00307321	0.00821606	0.00113548	0.00989037	0.00477016	0.00968498	0.0213151	0.00599188	0.213676	0.283544	0.34499	0.276334	0.282257	0.099877	0.143103	0.167052	0.152836	0.176819	0.101387	0.109591	0.183462	0.162263
Gm10561	0.0147432	0.0372733	0.032981	0.0432151	0.0326114	0	0.00292549	0.00386006	0.00525699	0.00451624	0.000611182	0.00115988	0	0	0	0	0	0.00287663	0.00226621	0.0119928	0.0191316	0.0382576	0.0477415	0.0481205	0.0475949	0.00170328	0.000785556	0.00249758	0.00368785	0.000541158	0	0	0	0	0.00402113	0.0515275	0.0590012	0.0630601	0.0520197	0.0795712	0.015573	0.0280421	0.0369062	0.0271573	0.0274368	0.0250515	0.00947901	0.0198094	0.0219882
Mars2	0.0565015	0.0255359	0.00848285	0.0348666	0.0336022	0.0222124	0.0245715	0.0293039	0.0284908	0.0362829	0.0106351	0.0131606	0.0278112	0.0121261	0.0117543	0	0.0478517	0.0213095	0.0362041	0.0427095	0.0193279	0.0164171	0.0310212	0.0372688	0.0336935	0.0264022	0.0091809	0.0183145	0.0233438	0.0249666	0.0205711	0.0076355	0.012184	0.0443313	0.0303936	0.0323298	0.041598	0.0168647	0.0708063	0.0280556	0.0334091	0.0198828	0.0254895	0.0209963	0.0278786	0.0388168	0.0191214	0.0390147	0.0291953
Boll	0	0.00212329	0	0	0	0	0	0	0	0	0	0	0	0	0	0	0	0	0	0	0	0	0	0	0	0	0	0	0	0	0.00556371	0	0	0	0	0	0	0	0	0	0.000843454	0	0	0	0.00232166	0	0	0	0
Plcl1	0.0921066	0.11545	0.11799	0.15717	0.101433	0	0	0.00173068	0.00515619	0.00779708	0.00482497	0.0060105	0.00729769	0.00512322	0.00117029	0.0426468	0.0183845	0.0126021	0.0122013	0.0157938	0.0651633	0.0787593	0.0868888	0.148061	0.0949412	0.00610189	0	0.0011436	0.000881675	0.000691777	0.0187093	0	0.0108622	0.011814	0.0157763	0.134364	0.112143	0.101313	0.197644	0.0801077	0.0365433	0.0593079	0.0492785	0.0988747	0.0566238	0.0906701	0.103057	0.13288	0.160758
9130227L01Rik	0	0	0	0	0	0	0	0	0	0	0	0	0	0	0	0	0	0	0	0	0	0	0	0	0	0	0	0	0	0	0	0	0	0	0	0	0	0	0	0	0	0	0	0	0	0	0	0	0
1700003I22Rik	0	0	0	0	0	0	0	0	0	0	0	0	0	0	0	0	0	0	0	0	0	0	0	0	0	0	0	0	0	0	0	0	0	0	0	0	0	0	0	0	0	0	0	0	0	0	0	0	0
Gm28240	0	0	0	0	0	0	0	0	0	0	0	0	0	0	0	0	0	0	0	0	0	0	0	0	0	0	0	0	0	0	0	0	0	0	0	0	0	0	0	0	0	0	0	0	0	0	0	0	0
Hsfy2	0	0	0	0	0	0	0	0	0	0	0	0	0	0	0	0	0	0	0	0	0	0	0	0	0	0	0	0	0	0	0	0	0	0	0	0	0	0	0	0	0	0	0	0	0	0	0	0	0
Satb2	0	0	0	0	0.00189356	0.00425139	0.00349725	0.000454253	0.00786031	0.00603447	0.00462094	0.00230629	0.0054806	0	0.00200081	0	0	0.00222243	0.00997991	0.00659361	0.00138664	0	0.0109743	0	0.00331775	0.000994238	0.00235959	0.0020091	0.00810173	0.00439135	0	0	0.00491422	0.0124002	0.00533068	0.00918772	0.00343271	0	0	0.0026678	0.00493417	0.0039488	0.00288753	0.00384688	0.00161905	0.00328753	0	0.00485141	0.0021445
1700126A01Rik	0	0	0	0	0	0	0	0	0	0	0	0	0	0	0	0	0	0	0	0	0	0	0	0	0	0	0	0	0	0	0	0	0	0	0	0	0	0	0	0	0	0	0	0	0	0	0	0	0
BC055402	0	0	0	0	0	0	0	0	0	0.00150269	0	0	0	0	0	0	0	0	0	0	0	0	0	0	0	0	0	0	0	0	0	0	0	0	0	0	0	0	0	0	0	0	0	0	0	0	0	0	0
4930558J18Rik	0	0	0	0	0.00112361	0	0.00158852	0	0	0	0	0	0	0.0019577	0	0	0	0.00142329	0.00132957	0	0	0	0	0	0	0.0006208	0.00141487	0.00363603	0.00386388	0.00384758	0	0	0	0	0.0074382	0	0	0	0	0	0	0	0.0022121	0	0.00106071	0	0.00251751	0	0
1700066M21Rik	0.0374423	0.0146105	0.0143097	0.0201473	0.025189	0.0148976	0.0129711	0.00761272	0.017793	0.0300081	0.0167971	0.0216386	0.0269706	0.0306538	0.0381733	0.0142253	0	0.0137904	0.0166394	0.0225473	0.0357092	0.0354692	0.0108746	0.0388465	0.0357091	0.0147673	0.013159	0.0105077	0.0150376	0.0278341	0.0197527	0.0235931	0.00429542	0	0.0423769	0.0191369	0.00230193	0.0020072	0.0167057	0.0486803	0.0271063	0.00873803	0.0214631	0.0281916	0.0455204	0.0146996	0.0181731	0.00680166	0.0220297
Tyw5	0.101698	0.0497346	0.0651172	0.082524	0.116236	0.0980842	0.0360664	0.0334481	0.0842108	0.113425	0.0930561	0.0532221	0.0670239	0.142358	0.12666	0.094299	0.029707	0.0528578	0.0870533	0.117412	0.0510271	0.0304295	0.0467337	0.101562	0.127922	0.0872921	0.0613602	0.0348016	0.0893672	0.0788715	0.049604	0.0493012	0.064888	0.111083	0.0979876	0.0844707	0.0475149	0.0677088	0.0799476	0.138182	0.0772459	0.0359536	0.0615499	0.0673608	0.101279	0.0726608	0.039343	0.0419209	0.0584425
Maip1	0.336356	0.174823	0.19595	0.276059	0.439022	0.355755	0.308483	0.296464	0.381586	0.418908	0.42645	0.364519	0.325327	0.32638	0.471679	0.398344	0.401466	0.258222	0.315764	0.385056	0.262925	0.258846	0.194123	0.225668	0.372664	0.434865	0.352344	0.353716	0.395495	0.444105	0.20912	0.210024	0.118571	0.111656	0.255895	0.256969	0.182524	0.199601	0.219664	0.304518	0.331677	0.210257	0.239453	0.262265	0.372324	0.244469	0.174725	0.157834	0.228165
Spats2l	0.581327	0.585024	0.511464	0.434783	0.571861	0.0531163	0.0624514	0.0625856	0.0550128	0.0852936	0.0589605	0.0495779	0.097907	0.0243501	0.0501952	0.16502	0.118698	0.114655	0.0864294	0.118528	0.708583	0.64366	0.912041	0.594476	0.705985	0.0612104	0.0502767	0.0374972	0.0296389	0.0381445	0.220158	0.0853983	0.054757	0.0256721	0.0803088	0.99103	0.968134	0.866128	0.698729	0.812993	0.794769	1.20861	1.78357	1.77627	1.96853	0.757647	0.54884	0.574712	0.447338
Gm17234	0	0	0	0.000635915	0	0	0	0	0	0	0	0	0	0	0	0	0	0	0	0	0	0	0	0	0	0	0	0	0	0	0	0	0	0	0	0	0	0	0	0	0	0	0	0	0	0	0	0	0
Kctd18	0.0633234	0.0830029	0.0566463	0.0675851	0.0853392	0.0753584	0.0685125	0.0464246	0.0710398	0.0938347	0.0693321	0.0731449	0.090984	0.0343818	0.114582	0.0815043	0.0573542	0.0734711	0.091712	0.127952	0.0973769	0.0519503	0.085017	0.0981919	0.134624	0.0534848	0.0562174	0.0440009	0.0432529	0.0629996	0.0843394	0.0405986	0.122501	0.168685	0.0619479	0.0735684	0.065184	0.0796064	0.113631	0.115506	0.0718117	0.0692095	0.127331	0.0933186	0.117205	0.0535755	0.0595573	0.0387664	0.0502018
Sgo2a	0.0253078	0.0136807	0.0230032	0.0112572	0.0205177	0.0221291	0.00851926	0.0169597	0.0128039	0.00838246	0.00987793	0.0152661	0.0310437	0.0174801	0.00789296	0.0127116	0.0105134	0.0206081	0.0130148	0.02188	0.0125169	0.0154788	0.0480644	0.0213481	0.03698	0.0887428	0.0840161	0.0571835	0.0655157	0.0893926	0.0272971	0.0466643	0.0196228	0	0.00856209	0.0275992	0.014784	0.0337952	0.0304989	0.0261719	0.00430041	0.0238407	0.0284832	0.00683774	0.00885604	0.012753	0.00917691	0.026208	0.0137051
Aox1	0.0267709	0.0177531	0.0387953	0.0818878	0.0434945	0.0115869	0.00478217	0.0150871	0.010106	0.0125581	0.0192582	0.00513357	0.0191393	0.0257644	0.0112331	0.0838531	0.0200134	0.0102123	0.0168498	0.00692472	0.028875	0.0484962	0.0883173	0.103935	0.108133	0.0124274	0.00944609	0.0123569	0.0151102	0.00836417	0.0853852	0.0228912	0.0350142	0	0.0377681	0.0299061	0.0354207	0.0539102	0.09927	0.102751	0.0210615	0.0104002	0.0245318	0.0448743	0.0429057	0.0339989	0.00982239	0.0277078	0.057765
Aox3	0.0575431	0.133392	0.0969387	0.113137	0.147426	0	0.00320658	0	0	0	0.000346758	0.00204783	0.0015724	0.0029175	0.00113963	0	0	0.0019487	0	0.000699593	0.0291543	0.0984676	0.117439	0.193591	0.138643	0.000656651	0	0.000658512	0	0.000899653	0.0360656	0	0.0164357	0.0305435	0	0.166056	0.463988	0.315751	0.61478	0.656743	0.0114802	0.00147347	0.00954503	0.0174398	0.00824316	0.0761692	0.0714567	0.0609879	0.0319513
Aox4	0	0.00220935	0	0.00474352	0.00202984	0	0.00241766	0.029003	0.0290506	0.00842782	0.0050815	0.0071907	0.00686507	0.00538026	0.00563012	0	0	0.0103542	0.0087531	0.00369225	0	0.0021704	0	0	0.00327229	0.0115208	0.0265347	0.0638089	0.0330444	0.0324889	0	0	0.0131904	0	0.00475169	0.00631301	0.00870909	0.0061365	0	0	0.00270388	0	0	0.00323813	0.000957388	0.0016463	0.00252596	0.00436287	0
Gm15759	0	0	0.000768788	0	0.000919951	0	0	0	0	0	0.000504314	0	0.00196676	0	0	0	0	0.000405922	0	0	0	0	0	0	0	0	0.000833229	0.000637614	0	0.000554293	0	0	0.0053147	0	0	0.00103857	0	0	0	0	0.00151779	0	0	0.00109746	0	0	0	0	0
Aox2	0.0161323	0.0282642	0.0124444	0.00881706	0.00726764	0.0097642	0	0.00334334	0.00578411	0.00739559	0.00302937	0.000828296	0	0	0.00830271	0.0127116	0	0.00270687	0.0073298	0.0071396	0.0377507	0.0345685	0.0306694	0.0228141	0.0197513	0.00622725	0.00306539	0.00363268	0.00632078	0.0079514	0.007967	0.0242975	0.01196	0	0.0203247	0.0171263	0.0353144	0.00985913	0.008736	0.0142636	0.0549868	0.0567627	0.0275022	0.0523595	0.0418798	0.0366786	0.0297685	0.0129163	0.0243417
Bzw1	3.62702	3.94052	3.20467	3.52826	3.01179	5.47716	3.73733	3.21335	4.88873	3.97408	4.25209	4.48094	3.64852	3.58574	3.02732	5.56604	5.44801	5.42736	6.77873	6.84042	3.95793	3.8534	3.47254	3.40566	2.95821	4.10555	3.80506	2.98949	3.40322	3.16896	2.36455	2.23377	2.06295	2.13235	2.31908	3.90141	4.18974	3.14019	2.93244	2.3296	5.13099	6.88773	5.26973	6.14344	4.69094	5.43299	5.4927	4.00317	5.29704
Clk1	4.51977	6.15836	5.82753	4.50115	3.58066	4.34008	4.58248	4.3133	3.82437	4.0719	3.57498	4.40067	4.70018	4.15783	3.16405	4.83922	4.97938	3.91977	3.80519	3.49447	4.87849	6.04641	6.77915	5.3756	3.98147	3.14328	3.40616	3.32522	2.86908	2.43859	7.22601	9.81408	8.00717	6.51977	6.57168	5.35216	7.68046	7.18191	6.24788	4.7883	4.758	4.96421	5.33777	4.17924	3.4544	4.99904	6.14155	6.72764	5.56886
Ppil3	0.29842	0.262716	0.240683	0.264431	0.310039	0.440624	0.289351	0.353996	0.384916	0.414357	0.414783	0.358356	0.295379	0.315558	0.397925	0.397862	0.406908	0.359342	0.37004	0.409978	0.288691	0.277671	0.269254	0.282002	0.309222	0.439444	0.361299	0.347812	0.401909	0.41427	0.105201	0.141717	0.0874534	0.0510952	0.191461	0.289553	0.236286	0.204736	0.229478	0.288895	0.302178	0.224936	0.254108	0.278661	0.308438	0.29656	0.236877	0.263425	0.254953
Nif3l1	0.0934377	0.088069	0.114082	0.0672204	0.116205	0.19566	0.160956	0.143393	0.149154	0.162816	0.219095	0.183287	0.162822	0.151915	0.203534	0.116783	0.164942	0.177696	0.159403	0.210091	0.122412	0.104432	0.111254	0.0926587	0.129435	0.242602	0.212684	0.204898	0.154462	0.242039	0.0904812	0.184098	0.0904513	0	0.0993384	0.1027	0.109828	0.114823	0.0712863	0.156973	0.178324	0.171689	0.167513	0.129636	0.220627	0.108169	0.113336	0.119859	0.0976374
Orc2	0.210253	0.226454	0.195959	0.142891	0.209843	0.329693	0.326737	0.25666	0.275064	0.280557	0.305264	0.304976	0.26307	0.305993	0.298945	0.229857	0.356555	0.26314	0.237626	0.322637	0.199347	0.171204	0.191658	0.149369	0.226571	0.492223	0.571485	0.410483	0.482579	0.506569	0.0820473	0.190317	0.13453	0.0956248	0.327366	0.20625	0.221035	0.208897	0.238528	0.27418	0.235508	0.270842	0.245865	0.235176	0.21961	0.185034	0.245389	0.172457	0.185376
Gm15834	0.00640796	0.00307415	0.0054683	0.00649581	0.00454813	0.00216647	0.00378251	0.00919327	0.00449018	0.0109568	0.0127506	0.0109065	0.0118645	0.018477	0.027844	0	0.0414236	0.00793318	0.0127983	0.0084769	0.0162899	0.0128739	0.0118918	0.0244981	0.0125063	0.0118916	0.0066704	0.00403456	0.00643557	0.00847452	0.0323201	0.0357586	0.0262608	0.00688088	0.0250927	0.0110486	0.0125751	0.0355749	0.0191899	0.0116564	0.0092022	0.00216218	0.00305431	0.00168216	0.0129365	0.00701989	0	0.00318103	0.00415641
Fam126b	0.424027	0.525234	0.539718	0.498658	0.52364	0.280124	0.615147	0.788854	0.617578	0.602066	0.176401	0.301921	0.415921	0.276131	0.388654	0.253363	0.574892	0.912036	0.691761	0.865546	0.368293	0.375881	0.450686	0.412831	0.48449	0.161133	0.31005	0.492304	0.340771	0.398485	0.356622	0.684646	1.10252	0.386176	0.801787	0.399246	0.448962	0.599853	0.477227	0.630182	0.178633	0.126928	0.202416	0.174153	0.25642	0.28777	0.281778	0.380927	0.340209
Ndufb3	1.21615	0.688161	0.720538	1.37133	1.55857	1.10614	0.842496	0.88169	1.4339	1.52127	0.995485	0.603718	0.568695	1.02617	1.20722	1.10023	0.593536	0.787261	1.26879	1.52362	0.984937	0.714852	0.740506	1.11775	1.49749	1.01413	0.878879	0.990904	1.60007	1.68071	0.365473	0.439081	0.297217	0.601851	0.738553	1.10116	0.757974	0.708544	1.06422	1.54862	1.02001	0.595076	0.649012	1.1137	1.22968	1.06447	0.59458	0.680182	1.10047
Als2cr12	0	0	0	0	0	0	0	0.000733763	0	0.00163541	0	0	0	0	0.00198943	0	0	0.00368343	0.00467305	0.00217447	0	0	0	0	0	0.000893508	0	0	0	0	0	0	0.00345481	0.0175365	0	0	0	0	0	0	0	0	0.0012066	0	0	0	0	0	0
Cflar	0.497437	0.490425	0.500188	0.609264	0.730436	0.536915	0.493116	0.49993	0.567965	0.696597	0.407611	0.456436	0.462281	0.485651	0.543174	0.654306	0.545929	0.474782	0.6102	0.686394	0.575949	0.585854	0.790487	0.736594	0.86568	0.289195	0.351256	0.388828	0.359444	0.448213	0.421541	0.549605	0.546609	0.482968	0.828021	0.594519	0.580792	0.605894	0.753965	0.872726	0.343194	0.435125	0.442464	0.464786	0.469728	0.490187	0.590223	0.623662	0.703637
Casp8	0.0955492	0.0460748	0.0478808	0.0630949	0.0599388	0.146776	0.100826	0.0645965	0.146207	0.17227	0.193405	0.117144	0.14834	0.13765	0.175486	0.166392	0.0345253	0.0931809	0.132254	0.144021	0.11184	0.0437222	0.066101	0.0716813	0.079353	0.319422	0.199274	0.183999	0.241501	0.207281	0.213576	0.116676	0.112019	0.0394598	0.102625	0.073229	0.0589766	0.0541239	0.0507158	0.0761481	0.0496743	0.0325626	0.0446644	0.0454961	0.0673838	0.0929631	0.0488041	0.0615137	0.080174
Trak2	0.179059	0.205481	0.146142	0.149453	0.142181	0.316423	0.31249	0.192499	0.292741	0.255491	0.218401	0.32467	0.321879	0.273529	0.300561	0.161914	0.206459	0.177571	0.203361	0.20516	0.11216	0.146914	0.138794	0.166208	0.129229	0.203694	0.222612	0.177864	0.232194	0.198734	0.396207	0.503512	0.364905	0.362782	0.244694	0.144561	0.171656	0.179665	0.111035	0.118468	0.125667	0.162361	0.137633	0.154776	0.134036	0.140815	0.209358	0.194838	0.217649
Stradb	0.0734637	0.056354	0.0671111	0.0838567	0.0812514	0.190654	0.135183	0.129166	0.170843	0.186406	0.141444	0.127452	0.128824	0.143926	0.184907	0.135783	0.0941113	0.11999	0.134268	0.118671	0.0722832	0.057216	0.0529309	0.0845147	0.0943473	0.138059	0.11013	0.102934	0.114032	0.145626	0.142808	0.190504	0.0978469	0.135495	0.13527	0.0744601	0.0457148	0.070301	0.0740588	0.0670878	0.0644522	0.0397784	0.0644171	0.0775584	0.0632028	0.0688028	0.0473095	0.0456803	0.0413014
C2cd6b	0	0	0	0	0	0	0	0	0	0	0	0	0	0	0.00169922	0	0	0	0	0	0	0.00504086	0	0	0	0	0	0.00082221	0.00362195	0	0	0.0189596	0	0	0	0	0	0	0	0	0	0	0	0	0.000809204	0	0	0	0
Gm29018	0	0	0	0	0	0	0	0	0	0.00272054	0	0	0	0.00215188	0	0	0	0	0	0	0	0	0	0	0	0	0	0.000826641	0	0.000629862	0	0	0	0	0	0	0	0	0	0	0	0	0	0	0	0	0	0	0
C2cd6	0	0	0	0	0	0	0	0	0	0	0.000715387	0	0	0	0	0	0	0	0	0.000699593	0.00151291	0	0	0	0	0	0	0	0	0	0	0	0	0	0	0	0	0.00546886	0	0	0	0	0	0	0	0	0	0	0
Tmem237	0.217726	0.18546	0.168128	0.183859	0.290729	0.335053	0.198252	0.198817	0.234775	0.329063	0.358389	0.278666	0.28557	0.354745	0.393004	0.368414	0.192446	0.219902	0.331103	0.371434	0.19818	0.131258	0.122321	0.190706	0.267427	0.332174	0.267016	0.258225	0.363239	0.430074	0.205879	0.170393	0.100167	0.092271	0.299504	0.251351	0.205112	0.249567	0.142422	0.322958	0.246547	0.186525	0.161998	0.182301	0.228586	0.299637	0.17239	0.185113	0.144556
G730003C15Rik	0.0117873	0.00356409	0.0102546	0.0105776	0.0106423	0.0115072	0.0181263	0.00745288	0.0101966	0.00640519	0.0242447	0.0178118	0.00373461	0.00609257	0.0223122	0	0	0.00493258	0.00459768	0.00988488	0.00973035	0.009144	0	0.00734778	0.00877488	0.0140656	0.00676635	0.00478417	0.0136249	0.00805764	0	0.00839946	0.00366859	0	0	0.00386397	0.0119068	0.00409186	0.00599242	0.0114368	0.0146036	0.00153631	0.00824085	0.0108206	0.0131476	0.00452024	0.00387117	0.00264353	0.00736481
Mpp4	0.00444587	0.00171709	0.00171753	0	0.000913204	0.00183088	0.00101955	0.00144591	0.00633815	0.00159603	0.00127193	0	0	0.00655948	0.000830972	0	0	0.00209549	0.00219125	0.0019206	0	0	0.00322255	0.00208647	0.00132764	0.00256644	0.0043405	0.000389976	0.0023675	0.0027165	0	0.00952526	0.00152959	0	0.0105198	0.00520362	0	0	0.00562929	0.00126929	0.000943781	0	0.00137157	0.00408221	0	0.00171107	0.00259813	0	0.00190518
Gm29017	0	0	0	0	0	0	0	0	0	0.000699056	0	0	0	0	0	0	0	0	0	0	0	0	0	0	0	0	0	0	0	0	0.00357049	0.00425551	0	0	0	0	0	0	0	0	0	0	0	0	0	0	0	0	0
Als2	0.030497	0.0231003	0.0208809	0.0197481	0.0194909	0.0283823	0.0416104	0.0171366	0.0400909	0.0452545	0.03788	0.0398787	0.0276636	0.0483671	0.0379256	0.0239809	0.011294	0.0253945	0.0398597	0.0415165	0.0188731	0.0153129	0.00582416	0.0293255	0.0183273	0.0276831	0.0286386	0.0253196	0.0406555	0.0375152	0.0731206	0.0810079	0.08557	0.0449766	0.0127137	0.0207037	0.0163317	0.0152432	0.0029706	0.0159113	0.0172489	0.00859424	0.0188744	0.00690838	0.0170273	0.00790749	0.0153267	0.0161613	0.0157759
Cdk15	0.000963798	0.00242161	0	0.0015792	0.000426216	0	0.00169533	0.00100051	0.00075864	0.000702001	0.000656493	0	0	0	0	0	0	0	0.000892136	0.00198821	0.00228456	0.00216596	0	0	0.00188666	0	0	0	0	0.000866414	0	0	0	0	0.00776425	0.00255552	0.00574196	0	0	0	0.00367163	0	0.00116044	0.00161061	0.000865997	0	0	0	0
Gm29016	0	0	0	0	0	0	0	0	0	0	0	0	0	0	0	0	0	0	0	0	0	0	0	0	0	0	0	0	0	0	0	0	0	0	0	0	0	0	0	0	0	0	0	0	0	0	0	0	0
Fzd7	0.239417	0.136226	0.0879709	0.183068	0.155208	0.0582061	0.0579951	0.0484587	0.0694059	0.0748771	0.0549296	0.0379608	0.0340932	0.0559064	0.0512641	0.0237945	0.0669884	0.0612472	0.0757662	0.0986927	0.175739	0.124317	0.0626129	0.118105	0.103824	0.0519681	0.037996	0.041049	0.0374246	0.0402585	0.107638	0.0327109	0.12875	0.123264	0.127851	0.436683	0.219708	0.19207	0.297144	0.338545	0.105101	0.0555072	0.0389585	0.0721233	0.093645	0.152648	0.0729781	0.0552473	0.098457
Gm26813	0.00122721	0.0012964	0	0	0	0	0.00126915	0.00132703	0	0.000641849	0.000575578	0.00309207	0	0	0	0	0	0.00284443	0.00104732	0.000478477	0.00188401	0.00250451	0.00496241	0	0	0.000692703	0	0.000707255	0	0	0	0	0	0	0	0	0	0	0	0	0	0.00235521	0	0	0	0.00339968	0	0	0
Gm973	0.00282845	0.00973844	0.000711082	0.000904086	0.000575459	0	0.00143449	0	0	0.000670781	0	0	0	0	0	0	0	0.00122751	0.000390616	0.00139589	0	0	0	0	0.000767442	0.00184291	0	0	0	0.00231698	0	0	0	0	0	0	0.0040391	0	0.0133909	0	0.00233609	0.0066733	0.00812938	0.00233295	0	0	0	0.003348	0
Gm28411	0	0	0	0	0	0	0	0	0	0	0	0	0	0	0	0	0	0	0	0	0	0	0	0	0	0	0	0	0	0	0	0	0	0	0	0	0	0	0	0	0	0	0	0	0	0	0	0	0
1700122D07Rik	0	0	0	0	0	0	0	0	0	0	0	0	0	0	0	0	0	0	0	0	0	0	0	0	0	0	0	0	0	0	0	0	0	0	0	0	0	0	0	0	0	0	0	0	0	0	0	0	0
Sumo1	1.36806	1.10056	1.11733	1.08565	1.31748	1.60331	1.43013	1.37938	1.52966	1.52966	1.73227	1.68446	1.65828	1.58604	1.60591	1.39626	1.66879	1.55405	1.61438	1.72647	1.40098	1.15453	1.28206	1.27028	1.52804	1.82632	1.78946	1.67481	1.64562	1.69715	0.725378	0.736393	0.653276	0.453512	0.747114	1.7044	1.59401	1.53684	1.40414	1.56182	1.49817	1.46105	1.5703	1.42687	1.51737	1.4612	1.20622	1.23784	1.20952
Nop58	1.47127	2.13865	1.48077	1.53023	0.871937	2.10997	2.63022	2.06613	2.13842	1.6523	2.04062	2.14609	2.15721	2.86945	1.84688	2.3223	2.43181	1.63484	1.66488	1.53646	2.865	3.5567	2.82887	3.20513	1.21296	3.30924	3.3567	3.12496	3.68902	2.85683	1.26311	1.76733	1.14957	1.55158	0.986073	2.42347	3.65461	3.05607	4.5261	1.6142	3.12348	4.00501	3.2951	4.03726	1.67643	2.19981	3.62327	2.21763	3.09327
Bmpr2	1.20498	1.12334	1.28384	1.30655	1.37382	1.71214	3.20007	4.87558	5.98925	6.25042	0.787702	1.02841	1.25006	1.18281	1.21192	1.23931	2.50059	5.4441	5.92063	6.84399	0.89122	0.930847	0.931683	1.05991	1.1462	1.05414	1.62593	2.09645	2.62702	2.92914	1.99545	2.34638	4.73815	4.67467	4.46752	1.15722	0.891268	1.00261	1.46614	1.38592	0.536159	0.43177	0.545237	0.488062	0.636227	0.994976	0.965428	1.06591	1.35132
Fam117b	0.353076	0.434274	0.376227	0.256841	0.305231	0.30082	0.469355	0.552191	0.587798	0.447022	0.304658	0.475017	0.437677	0.413767	0.286885	0.197299	0.503527	0.554287	0.533923	0.43248	0.319813	0.271393	0.248572	0.246717	0.243345	0.322686	0.466674	0.456258	0.467893	0.410848	0.474813	0.608903	0.703266	0.550629	0.276552	0.387905	0.357655	0.28579	0.470854	0.375249	0.22465	0.210517	0.154238	0.174267	0.185751	0.296869	0.281597	0.254206	0.270958
Ica1l	0.0401302	0.0562332	0.0571387	0.0332879	0.0198671	0.00373676	0.0208677	0.0300088	0.0224179	0.0248632	0.00507504	0.00370828	0.00368643	0.00840492	0.00396662	0.050464	0.0062746	0.0225227	0.0293318	0.0430726	0.00991636	0.0125767	0.0107787	0.00641018	0.00271893	0.00106418	0.0112871	0.0147856	0.0107982	0.00402505	0	0	0.0255018	0	0.0116496	0.0143123	0.0289509	0.0205138	0.0137996	0.0231188	0.00612262	0.0102378	0.00146397	0.00563885	0.00535601	0.00677721	0.0101249	0.0222935	0.00261328
Wdr12	0.287796	0.281231	0.194335	0.169756	0.234554	0.473773	0.621302	0.55471	0.413353	0.368649	0.640044	0.665816	0.510436	0.57877	0.662862	0.259278	0.404678	0.419199	0.337665	0.343807	0.30864	0.344613	0.247847	0.172696	0.239241	0.727441	0.808695	0.749661	0.700911	0.587617	0.410633	0.427102	0.351496	0.354517	0.272728	0.365667	0.424701	0.285209	0.26143	0.370594	0.42748	0.548997	0.536498	0.52087	0.510455	0.299416	0.380374	0.257293	0.217649
Carf	0.0688176	0.0356125	0.0464734	0.0624306	0.0477276	0.0811541	0.0727435	0.0284573	0.0788133	0.0810372	0.0830879	0.0703468	0.0710571	0.0850088	0.0989928	0.110791	0.0630689	0.0410671	0.0754662	0.0648346	0.104815	0.06151	0.044592	0.0813837	0.0602499	0.0743381	0.0618724	0.0454745	0.0584013	0.0680402	0.20098	0.113189	0.0670318	0.170058	0.176082	0.0859806	0.0551212	0.00923983	0.0895918	0.0806551	0.0815316	0.0525305	0.0481821	0.091425	0.106766	0.0893705	0.0341794	0.0331618	0.0439837
Nbeal1	0.608636	0.614023	0.56308	0.707536	0.571941	0.587067	0.577461	0.483263	0.592442	0.719903	0.541155	0.547051	0.559847	0.710999	0.653682	0.536017	0.633166	0.67829	0.852203	0.877797	0.659896	0.598521	0.633183	0.825841	0.74232	0.467684	0.358838	0.318761	0.416624	0.426546	1.44117	1.20837	0.8984	1.16889	1.39183	0.742036	0.640475	0.623084	0.824911	0.600986	0.435751	0.362088	0.365918	0.407951	0.421086	0.623298	0.614592	0.511726	0.682031
Cyp20a1	0.258596	0.212144	0.152252	0.17175	0.197885	0.190016	0.172917	0.183643	0.183983	0.188724	0.216408	0.194137	0.16509	0.23214	0.188753	0.295945	0.209397	0.129992	0.169713	0.206871	0.401505	0.280952	0.20353	0.291941	0.329767	0.200069	0.208765	0.214258	0.216009	0.218754	0.21587	0.231669	0.200507	0.09227	0.132982	0.340853	0.274318	0.19621	0.230363	0.31997	0.433154	0.328006	0.286461	0.361243	0.318279	0.390663	0.337789	0.250562	0.298767
Abi2	0.342595	0.300319	0.331942	0.266901	0.296784	0.26185	0.263056	0.182225	0.22614	0.259041	0.319138	0.27627	0.330022	0.343961	0.298988	0.36036	0.377221	0.271533	0.360297	0.305271	0.471725	0.410852	0.388127	0.377389	0.405364	0.309156	0.23335	0.209579	0.257084	0.277327	0.586567	0.460078	0.27153	0.311763	0.221901	0.452107	0.500641	0.417044	0.394217	0.424616	0.343006	0.355192	0.421547	0.372301	0.411319	0.400518	0.317062	0.244632	0.391594
Raph1	0.300103	0.248558	0.164909	0.1741	0.118301	0.414472	0.455216	0.318131	0.405306	0.527508	0.285716	0.220626	0.265941	0.30265	0.172499	0.304036	0.230408	0.197569	0.238973	0.199906	0.327094	0.286972	0.316973	0.231304	0.275256	0.355652	0.388773	0.433038	0.449335	0.587672	0.9443	0.836518	0.948829	0.455047	0.69868	0.630221	0.548491	0.34327	0.546234	0.333115	0.253115	0.175269	0.184296	0.235314	0.223608	0.472138	0.387021	0.285637	0.409336
Cd28	0.00060895	0	0	0	0	0	0	0.00050523	0	0	0	0	0	0	0	0	0	0	0	0	0	0	0	0.00388017	0	0	0	0	0	0.0019378	0	0	0	0	0	0	0	0	0	0	0	0	0	0	0	0	0	0	0
Gm11579	0	0	0	0	0	0	0	0	0	0	0	0	0	0	0	0	0	0	0	0	0	0	0	0	0	0	0	0	0	0	0	0	0	0	0	0	0	0	0	0	0	0	0	0	0	0	0	0	0
2310016D23Rik	0	0	0	0	0	0	0	0	0	0	0	0	0	0	0	0	0	0	0	0	0	0	0	0	0	0	0	0	0	0	0	0	0	0	0	0	0	0	0	0	0	0	0	0	0	0	0	0	0
Ctla4	0	0	0	0	0	0	0	0	0	0	0	0	0	0	0	0	0	0	0.00296345	0	0	0	0	0	0	0	0	0	0	0	0	0	0	0	0	0	0	0	0	0	0	0	0	0	0	0	0	0	0
Icos	0	0	0	0	0	0	0	0	0	0	0	0	0	0	0	0	0	0.000316541	0	0	0	0	0	0	0	0	0	0	0	0.000457353	0	0	0	0	0	0.00230244	0	0.01216	0.00433811	0.00330521	0.000722292	0	0.00130662	0	0	0.00206104	0.00127134	0	0
Gm28083	0	0	0	0	0	0	0	0	0	0	0	0	0	0	0	0	0	0	0	0	0	0	0	0	0	0	0	0	0	0	0	0	0	0	0	0	0	0	0	0	0	0	0	0	0	0	0	0	0
Gm11587	0	0	0	0	0	0	0	0	0	0	0	0	0	0	0	0	0	0	0	0	0	0	0	0	0	0	0	0	0	0	0	0	0	0	0	0	0	0	0	0	0	0	0	0	0	0	0	0	0
9530026F06Rik	0.000933361	0	0.00462988	0	0.000889127	0	0	0	0	0	0	0	0	0	0	0	0	0	0	0	0	0.00300648	0.00811431	0	0.00248619	0	0	0	0	0	0	0	0	0	0	0	0	0	0	0	0.00348573	0.00218533	0.00174176	0.00251044	0.011934	0.00167428	0	0.00428828	0.0029794
Gm11588	0	0	0	0	0	0	0	0	0	0	0	0	0	0	0	0	0	0	0	0	0	0	0	0	0	0	0	0	0	0	0	0	0	0	0	0	0	0	0	0	0	0.000711505	0	0	0	0	0	0	0
Gm28449	0	0	0	0	0	0	0	0	0	0	0	0	0	0	0	0	0	0	0	0	0	0	0	0	0	0	0	0	0	0	0	0	0	0	0	0	0	0	0	0	0	0	0	0	0	0	0	0	0
4930587A21Rik	0	0	0	0	0	0	0	0	0	0	0	0	0	0	0	0	0	0	0	0	0	0	0	0	0	0	0	0	0	0	0	0	0	0	0	0	0	0	0	0	0	0	0	0	0	0	0	0	0
Pard3b	0.458583	0.563945	0.447058	0.417235	0.351333	0.0619208	0.125258	0.0862147	0.0757652	0.0481695	0.0824487	0.197767	0.31484	0.145231	0.163794	0.245515	0.195129	0.139257	0.153772	0.121152	0.414017	0.525227	0.563525	0.577582	0.41132	0.0836566	0.0913233	0.0855358	0.0727178	0.0564162	0.233653	0.346863	0.184759	0.159067	0.100444	0.584446	0.610636	0.358086	0.38948	0.364704	0.499064	0.392542	0.378091	0.331058	0.279794	0.492444	0.416535	0.434945	0.317203
Pard3bos1	0.0210885	0.0493833	0.0077442	0.00454127	0.0135509	0.0102332	0.000957504	0.00165463	0	0.00264753	0.0038337	0.00746634	0.0131618	0	0.0216523	0	0.0148276	0.000659215	0.00177942	0.00269802	0.0381642	0.0480865	0.00368174	0.0168333	0.0540811	0.00275542	0.00273341	0.00168701	0	0.00477227	0	0.17068	0.0619049	0	0.0699071	0.0262103	0.0280352	0	0.012293	0.022561	0.00584291	0.0108143	0.00152456	0.00236641	0.0202266	0.00469344	0.0170261	0.00967913	0.00356427
Pard3bos2	0.000462487	0.000995378	0	0	0	0	0	0	0	0	0	0	0	0	0	0	0	0	0	0	0	0	0	0	0	0	0	0	0	0	0	0	0	0	0	0	0	0	0	0	0	0	0	0	0	0	0	0	0
Pard3bos3	0	0.00289038	0	0	0	0	0	0	0.000738194	0	0	0	0	0	0	0	0	0	0	0	0	0	0	0	0.00104114	0	0	0	0	0	0	0	0	0	0	0	0.00220486	0	0	0	0	0	0	0	0	0	0.00256764	0	0
Gm29084	0	0	0	0	0	0	0	0.000649886	0	0	0	0	0	0	0	0	0	0	0	0	0	0	0	0	0	0	0	0	0	0	0	0	0	0	0	0	0	0	0	0	0	0	0	0	0	0	0	0	0
Nrp2	0.399392	0.990412	1.22865	1.07407	1.19285	0.00842829	0.0204306	0.0272018	0.0170677	0.0325727	0.0228788	0.0240191	0.0375013	0.0730748	0.0471952	0.00800347	0.0800745	0.0959844	0.141352	0.155879	0.588099	1.23997	1.63875	1.37642	1.18543	0.026436	0.0268657	0.016701	0.0295494	0.0353991	0.127387	0.0513073	0.0918558	0.112676	0.197953	1.72842	1.90961	2.33114	2.42618	2.56551	1.03828	1.38603	1.42991	1.41258	1.50572	0.583622	0.967641	0.964714	0.864116
Gm29083	0	0.00140059	0.00440371	0.00705649	0.00497067	0	0	0	0	0	0	0	0	0	0	0	0	0	0	0	0	0.00430327	0.00316948	0	0.00168019	0	0	0	0	0	0	0	0	0	0	0	0	0	0	0.00346339	0	0.00111776	0	0	0.00164841	0	0	0	0
Gm4208	0.00278628	0.00277082	0	0.000887179	0	0	0	0	0	0	0	0	0	0.00256231	0	0	0	0	0	0	0	0	0	0	0	0	0	0	0	0	0	0	0	0	0	0	0	0	0	0	0	0.000750246	0.00159552	0	0.000783994	0.00112376	0.00198751	0	0
Ino80d	0.515757	0.560213	0.473987	0.469392	0.381669	0.402003	0.538004	0.438576	0.441303	0.423276	0.452849	0.518968	0.598511	0.491973	0.377713	0.529485	0.735145	0.482936	0.48391	0.513093	0.511096	0.479881	0.504683	0.596276	0.492749	0.343439	0.419634	0.373565	0.32475	0.328883	0.924328	1.08453	0.803403	0.783386	0.613999	0.511401	0.633825	0.535899	0.54684	0.462516	0.403534	0.352802	0.403509	0.394184	0.359891	0.438949	0.46004	0.345624	0.45417
Ino80dos	0.0463283	0.0367086	0.024496	0.0447033	0.0237181	0.0336207	0.0208807	0.0221665	0.0396607	0.0278376	0.0286584	0.0237827	0.0348271	0.0421499	0.0410571	0.0139354	0.00808831	0.0146883	0.0351301	0.0316961	0.0608047	0.0572513	0.0143278	0.070307	0.047548	0.0277258	0.0186298	0.020432	0.0276981	0.0176609	0.0570854	0.0542055	0.0382799	0	0.106579	0.0714473	0.0422515	0.0366053	0.0804418	0.0338522	0.0511827	0.0162962	0.015177	0.0529173	0.0239173	0.0365574	0.0131288	0.0348899	0.0402732
Gm20342	0.245891	0.0980988	0.11665	0.1581	0.0923169	0.209021	0.0773136	0.097337	0.118182	0.133716	0.192873	0.101434	0.161923	0.1697	0.143773	0.223412	0.145037	0.0822899	0.137441	0.137002	0.257228	0.0779656	0.157281	0.210836	0.119829	0.159662	0.105887	0.093137	0.111317	0.114706	0.511871	0.369234	0.306376	0.281439	0.418589	0.411481	0.190942	0.180298	0.175219	0.155205	0.22162	0.11797	0.154366	0.173726	0.123191	0.190957	0.140741	0.10244	0.127865
Ndufs1	0.376556	0.405834	0.371637	0.381504	0.365587	0.602226	0.455293	0.386493	0.520011	0.500744	0.563795	0.473237	0.450311	0.573923	0.588106	0.491725	0.454235	0.362714	0.475379	0.433873	0.366276	0.347172	0.30019	0.332759	0.351415	0.590503	0.56808	0.546623	0.572555	0.620401	0.553293	0.486427	0.480517	0.461858	0.575077	0.326206	0.27633	0.295163	0.292444	0.390526	0.369217	0.288111	0.371106	0.369208	0.432315	0.333427	0.283693	0.262582	0.333554
Eef1b2	11.6408	11.896	13.4008	13.4963	14.4132	13.0361	15.8371	18.0424	16.7514	14.8596	14.092	16.0819	15.4253	18.539	17.9598	11.2826	14.9952	17.3374	15.8216	14.8726	15.0702	14.6205	16.5883	14.8373	15.1299	16.1088	17.628	17.3959	19.4906	17.9805	3.82284	4.71234	5.50299	3.84911	6.23463	13.0235	11.9232	14.1311	14.1242	15.0212	18.6206	20.3437	20.2247	22.3541	21.4515	15.0414	14.6274	15.8259	16.3589
Gpr1	0.00191302	0	0	0	0	0	0	0	0	0	0	0	0	0	0	0	0	0	0	0.00154357	0	0	0	0.00217423	0	0	0.00068194	0	0	0	0	0	0	0	0	0	0	0	0	0	0	0	0	0	0	0	0	0	0
Gm11608	0	0	0	0	0	0	0	0	0	0	0	0	0	0	0	0	0	0	0	0	0	0	0	0	0	0	0	0	0	0	0	0	0	0	0	0	0	0	0	0	0	0	0	0	0	0	0	0	0
Zdbf2	0.91416	1.53915	0.768838	0.409482	0.183538	0.358064	0.249995	0.0984295	0.134527	0.0205723	0.301477	0.208217	0.208645	0.144878	0.0342938	0.409374	0.325374	0.190972	0.196159	0.0623085	0.796085	0.860651	0.350836	0.151937	0.0370851	0.312597	0.175172	0.116864	0.152152	0.0279885	0.473103	0.294661	0.195813	0.413981	0.0210315	2.07502	2.56047	1.70501	1.51807	0.536595	1.01154	0.77487	0.327885	0.140859	0.0573562	1.56354	1.67434	0.724842	0.793645
Adam23	0.0940083	0.0247846	0.0196508	0.0156665	0.0188626	0.0440299	0.000633715	0.00700796	0.0171203	0.0169467	0.0591104	0.00216691	0.00151191	0.00512058	0.0076203	0.0085	0	0.00686881	0.0161964	0.0243604	0.177417	0.0534434	0.217088	0.31726	0.163875	0.0650008	0.00651446	0.00788753	0.0166851	0.0170308	0.206699	0	0	0.0292275	0.0108769	0.15413	0.0524983	0.050766	0.0691677	0.0727905	0.186861	0.0681031	0.0721468	0.227977	0.130869	0.104492	0.0206981	0.0439355	0.0434174
Gm39653	0	0	0	0	0	0	0	0	0	0	0	0	0	0	0	0	0	0	0	0	0	0	0	0	0	0	0	0	0	0	0	0	0	0	0	0	0	0	0	0	0.000786976	0	0	0	0	0	0	0	0
Dytn	0	0	0	0	0	0	0	0	0	0.00113598	0	0	0	0	0	0	0	0	0	0	0	0	0	0	0	0	0	0	0	0	0	0	0	0	0	0	0	0	0	0	0	0	0	0	0	0	0	0	0
Mdh1b	0	0	0	0	0	0.00166003	0.0013691	0.000379947	0	0.00120636	0.000567005	0	0	0.00355921	0	0	0	0	0	0	0	0	0	0	0	0	0.00310063	0.00261829	0.000831004	0.001619	0	0	0	0	0	0	0	0	0	0	0	0	0	0	0	0	0	0	0
Fastkd2	0.0950645	0.105359	0.117464	0.0608873	0.0918311	0.222411	0.23712	0.230446	0.188089	0.190664	0.245185	0.239913	0.264962	0.28664	0.252502	0.289072	0.196133	0.198608	0.180538	0.220509	0.0892042	0.109123	0.10174	0.0767053	0.126899	0.274839	0.296204	0.293633	0.271992	0.275799	0.172646	0.224224	0.210838	0.126777	0.20649	0.0981768	0.0966833	0.0953003	0.101733	0.105628	0.117977	0.112448	0.139281	0.100809	0.115361	0.0866509	0.107964	0.115858	0.108509
4933402D24Rik	0	0	0	0	0.000426671	0	0	0	0	0	0.000329586	0	0	0	0	0	0	0	0	0	0	0	0	0	0	0	0.000841916	0	0	0	0	0	0.00826732	0	0	0	0	0	0	0	0	0	0	0	0	0	0	0	0
Gm13749	0	0	0	0	0	0	0	0	0	0	0.00140438	0	0.0051751	0	0	0	0	0	0	0	0	0	0	0	0.000699279	0.000692703	0	0	0	0	0	0	0	0	0	0.00349588	0	0	0	0	0	0	0	0	0.00126673	0	0	0	0
Klf7	0.738331	0.83992	0.658317	0.845244	0.835013	0.3125	0.288385	0.46951	0.603145	0.640772	0.182242	0.272865	0.42645	0.232738	0.247846	0.677559	0.78879	0.64291	0.731874	0.768216	0.545206	0.715956	0.854965	0.954626	0.966199	0.128803	0.178354	0.197221	0.189417	0.180215	0.309972	0.352654	0.554278	0.466525	0.655706	0.589539	0.66134	0.561069	0.678498	0.684454	0.515973	0.509054	0.514922	0.652628	0.552691	0.518801	0.570447	0.556894	0.670163
Gm26649	0.00608854	0.0444342	0.00575947	0.0128526	0.0187032	0.00224392	0.00535035	0.0104674	0.00386856	0.00470242	0.00077649	0.00486429	0.0112592	0.0104513	0	0	0.0258179	0.00652442	0.00520819	0.00992722	0.00607386	0.0309399	0.00684568	0.0163317	0.0129008	0	0.0056598	0.00253348	0.00401252	0.000613785	0	0.0323536	0.0124418	0	0.0400651	0.00521878	0.0134852	0.00436184	0.0119333	0.00257363	0.00477115	0.00639578	0.00695599	0.0045287	0.0155237	0.00784772	0.0187108	0.0114662	0.0120708
Gm13748	0	0	0	0	0	0	0	0	0	0	0	0	0	0.00151011	0	0	0	0	0	0	0	0	0	0	0	0	0	0	0	0	0	0	0	0	0.00955129	0	0	0	0	0	0	0	0	0	0	0	0	0	0
Gm28981	0	0	0	0	0	0	0	0	0	0.000569963	0	0	0	0	0	0	0	0	0	0	0	0	0	0	0	0	0	0	0	0	0	0	0	0	0	0	0	0	0	0	0	0	0	0	0	0	0	0	0
Creb1	0.33561	0.385789	0.361686	0.434145	0.427044	0.602854	0.471846	0.440111	0.530567	0.59741	0.519067	0.501658	0.395551	0.591795	0.569365	0.429825	0.446243	0.499152	0.511402	0.534042	0.4164	0.496093	0.470443	0.570685	0.550089	0.40464	0.383052	0.406946	0.382078	0.3828	0.550868	0.884637	0.552072	0.461923	0.712061	0.414726	0.452623	0.373627	0.35765	0.438899	0.359377	0.413967	0.41845	0.392177	0.469666	0.381816	0.391497	0.276172	0.4445
Mettl21a	0.125676	0.0451741	0.0581894	0.0787832	0.098115	0.0703052	0.0378114	0.069682	0.0724867	0.0913308	0.0656908	0.0309338	0.0545248	0.0678511	0.0775804	0.0453485	0.0471584	0.0622102	0.0710361	0.0899871	0.110082	0.0935824	0.0691871	0.0483575	0.115993	0.0695377	0.0516112	0.0715592	0.0862485	0.0797014	0.0156321	0.0564772	0.0334063	0.0240285	0.119869	0.122028	0.0586092	0.0678517	0.0690009	0.180403	0.148479	0.0797297	0.10023	0.127077	0.172944	0.0860214	0.0616319	0.0773727	0.0593997
Gm28982	0	0	0	0	0	0	0	0	0	0	0	0	0	0	0	0	0	0	0	0	0	0	0	0	0.000617118	0	0	0	0	0	0	0	0	0	0	0	0	0	0	0	0	0	0	0	0.00163294	0	0	0	0
Gm29152	0	0	0	0	0	0	0	0	0	0	0	0	0	0	0	0	0	0	0	0	0	0	0	0	0	0	0	0	0	0	0	0	0	0	0	0	0	0	0	0	0	0	0	0	0	0	0	0	0
Ccnyl1	0.0840162	0.0604794	0.0536924	0.0692518	0.0533258	0.08055	0.0646131	0.0466705	0.0819911	0.095555	0.0814494	0.0637481	0.0466067	0.0409015	0.0489354	0.108143	0.0619782	0.069598	0.0690818	0.0872532	0.0855895	0.0555605	0.0465345	0.0925757	0.0439361	0.0795755	0.0634619	0.0665441	0.0555849	0.0893109	0.191995	0.0718005	0.0843757	0.138189	0.18663	0.114729	0.104389	0.0314161	0.0456961	0.0456116	0.108499	0.11288	0.0987162	0.071428	0.0711139	0.0971521	0.0993336	0.0611079	0.0890914
Fzd5	0.0963685	0.0270125	0.0599959	0.10206	0.0594806	0.0935651	0.102754	0.0612243	0.136921	0.105409	0.0715081	0.0536471	0.0645208	0.1098	0.0573651	0.0813901	0.094354	0.100151	0.168506	0.158785	0.0552161	0.0463906	0.0586284	0.0937732	0.033013	0.0636649	0.0538756	0.0528155	0.083952	0.0474129	0.0951299	0.0902308	0.0865011	0.093542	0.099864	0.0535705	0.0761314	0.0887738	0.11264	0.0364903	0.0388035	0.0256268	0.0156984	0.0426795	0.00682769	0.0764895	0.0471418	0.0327268	0.0825838
Plekhm3	0.0707407	0.0907631	0.0587485	0.0633656	0.0754152	0.0936766	0.0643091	0.0788461	0.0784736	0.0957112	0.0526289	0.0593815	0.0547493	0.0582375	0.0727909	0.137793	0.0563571	0.0621418	0.0998997	0.121672	0.092834	0.047552	0.0639364	0.0762811	0.0465069	0.064572	0.0393704	0.0494334	0.0626423	0.0714928	0.177248	0.184003	0.0794464	0.112886	0.129926	0.0841922	0.041242	0.0702299	0.0761283	0.0600317	0.0774859	0.0370078	0.0454373	0.0493864	0.0602688	0.058053	0.061528	0.0227975	0.0548171
Akr1cl	8.75573	8.18225	11.589	10.3581	12.6981	30.0768	32.7413	39.288	32.1484	32.2908	19.4232	20.4646	21.5919	18.4844	18.4897	22.4596	26.5158	24.7496	24.6659	21.8463	15.22	15.1147	20.2556	19.7268	20.6767	18.7542	23.9075	33.1627	26.2627	23.675	21.2474	19.1634	19.2864	13.4948	21.6597	4.70658	5.7456	8.10435	7.26548	7.06688	12.0068	13.634	17.5077	17.202	14.9109	13.3151	12.4258	18.2873	19.0607
Cryge	0.0288396	0.0151093	0.0282207	0.0371233	0.0293849	0.0020217	0.00627167	0.00676684	0.00533272	0.00702195	0.0045223	0.00100541	0.00559615	0.00524121	0.00275281	0	0	0.00235033	0.00278114	0.00172086	0.0308948	0.0146197	0.0409483	0.0372712	0.0490932	0.00333164	0.000731922	0.0093724	0.0109903	0.00767554	0	0	0	0	0.0256614	0.016486	0	0.0230062	0	0.0129177	0.0578458	0.0509359	0.0786533	0.0633328	0.0459146	0.0326576	0.0114643	0.0154417	0.00764355
Crygd	0	0	0.000986819	0	0.00097794	0	0	0	0	0	0	0	0	0	0	0	0	0	0	0	0	0	0	0.00234965	0.00340218	0.00065997	0	0	0	0	0	0	0	0	0	0	0	0	0	0	0.000879227	0	0	0	0	0.00176551	0.00242745	0.00463881	0.00339734
Crygc	0	0	0	0.00128429	0.00147741	0.00157005	0.00147551	0.000685054	0	0	0.0121981	0.00424158	0	0	0.00142257	0	0	0.00102319	0	0.000599736	0.00596583	0	0.0278415	0	0.0108206	0.00918486	0.00147817	0	0.00109723	0	0	0	0	0	0	0	0	0	0	0	0.00248737	0.00279112	0.0148205	0.00950109	0.00954041	0.00157044	0	0.00528519	0.00471017
Crygb	0	0	0	0	0	0	0	0	0	0	0.00135373	0	0	0	0	0	0	0	0	0	0	0	0	0	0	0.000635108	0	0	0	0	0	0	0	0	0	0	0	0	0	0.00320017	0	0	0	0.00372698	0.00368879	0	0	0	0
Cryga	0	0	0	0	0	0	0	0	0	0	0	0	0	0	0	0	0	0	0	0.000584699	0	0.00216596	0	0	0	0	0	0	0	0	0	0	0	0	0	0	0	0	0	0	0	0	0	0	0	0	0	0	0
Gm28845	0	0	0	0	0	0	0	0	0	0	0	0	0	0	0	0	0	0	0	0	0	0	0	0	0	0	0	0	0	0	0	0	0	0	0	0	0	0	0	0	0	0	0	0	0	0	0	0	0
D630023F18Rik	0	0.00205264	0	0.00326618	0.000484547	0	0	0	0	0	0.000769489	0.000937024	0	0	0	0	0	0	0.000772623	0	0.00168447	0	0	0	0	0.000723513	0	0	0	0.00416254	0	0	0	0	0	0	0	0	0.00645454	0	0.00211963	0	0.00165997	0.00235155	0	0	0	0	0
Idh1	0.685088	0.303998	0.509092	0.622431	0.774989	1.52095	0.734327	0.57073	1.06952	1.09483	1.77477	1.02891	0.993104	1.0248	0.926165	1.80123	0.854481	0.799083	1.15276	1.0463	0.676775	0.439503	0.637786	0.789165	0.781266	1.19948	0.6376	0.607408	0.800711	0.695988	0.984847	0.563846	0.272771	0.279428	0.462215	0.446945	0.286497	0.493363	0.437559	0.443863	0.747711	0.52715	0.783925	0.768209	0.7904	0.736537	0.364558	0.730413	0.716161
Pikfyve	0.187571	0.171254	0.140101	0.184279	0.168528	0.190229	0.139047	0.151972	0.275007	0.266355	0.233502	0.24383	0.204988	0.262797	0.255638	0.186831	0.131268	0.25783	0.358741	0.331588	0.20586	0.114846	0.160867	0.224714	0.205809	0.263054	0.166333	0.143121	0.180457	0.213775	0.553445	0.355626	0.245778	0.269024	0.330045	0.175632	0.141908	0.134402	0.219479	0.186613	0.153762	0.12227	0.131124	0.210467	0.18421	0.185936	0.132134	0.118556	0.210156
Pth2r	0	0	0	0	0	0	0	0	0	0	0	0	0	0	0	0	0	0	0	0	0	0	0	0	0	0	0	0	0.00126245	0	0	0	0	0	0	0	0	0	0	0	0	0	0	0	0.00201663	0	0	0	0
Crygf	0	0	0	0	0	0	0	0	0	0	0	0	0	0	0	0	0	0	0	0	0	0	0	0	0	0	0	0	0	0	0	0	0	0	0	0	0	0	0	0	0	0	0	0	0	0	0	0	0
Map2	0.0493432	0.0395738	0.0471093	0.0429503	0.0185266	0.095426	0.0744539	0.192418	0.158613	0.261869	0.0207909	0.0206792	0.0299706	0.0180755	0.0239069	0.0305363	0.0656055	0.164972	0.180451	0.158236	0.0263633	0.0100751	0.0329105	0.00860832	0.011242	0.0371688	0.0568414	0.0664281	0.0579918	0.0516555	0.106541	0.0759315	0.270558	0.214015	0.118459	0.00725937	0.00633757	0	0	0	0.0843416	0.0343719	0.0346568	0.0215442	0.0271122	0.0178174	0.0043003	0.00667885	0.00443619
Gm10558	0	0	0	0	0	0	0	0	0	0.000686625	0	0.000672203	0	0	0	0	0	0	0.00112437	0.000854241	0	0	0	0	0	0	0	0	0	0	0	0	0	0	0	0	0	0	0	0	0	0	0	0	0	0	0	0	0
Unc80	0	0.00149545	0.0010098	0	0	0.0056614	0	0	0	0.000509061	0.000616452	0.00106729	0.00232729	0	0	0	0	0	0	0.000516601	0	0	0	0	0	0.000613692	0	0	0.0043828	0	0	0	0	0	0	0	0	0	0	0	0	0	0	0	0	0	0	0	0
Rpe	0.168094	0.085326	0.0657988	0.183445	0.191895	0.232174	0.150622	0.107059	0.225933	0.268112	0.192644	0.115831	0.113907	0.230053	0.197474	0.253538	0.0752419	0.116831	0.234776	0.202623	0.250556	0.0942918	0.0965416	0.179408	0.212717	0.1579	0.116113	0.112949	0.171079	0.181207	0.333849	0.0962138	0.113995	0.0719578	0.268816	0.161885	0.075793	0.0813101	0.208662	0.221098	0.197455	0.109984	0.100857	0.176477	0.170787	0.197692	0.0944554	0.0788328	0.169802
Kansl1l	0.374892	0.334264	0.275241	0.430071	0.380272	0.387308	0.21003	0.227363	0.285572	0.287598	0.41032	0.326142	0.308555	0.423858	0.338703	0.347704	0.276786	0.215991	0.381411	0.333636	0.329357	0.212579	0.208219	0.444351	0.34259	0.299492	0.195346	0.179212	0.241689	0.199676	0.984195	0.790239	0.507567	0.422758	0.528162	0.363784	0.301258	0.234906	0.409417	0.342496	0.361012	0.192172	0.13153	0.259413	0.213856	0.248985	0.164956	0.188642	0.254513
Acadl	0.655695	0.607646	0.565527	0.751054	0.761227	1.0331	0.872143	0.994582	1.06971	1.10271	1.27352	1.20152	1.29244	1.43772	1.39375	1.19462	1.07797	1.22571	1.43001	1.14159	0.632629	0.515005	0.731677	0.761663	0.797192	1.36886	1.1837	1.21106	1.34297	1.12098	0.473434	0.405162	0.392321	0.119072	0.533345	0.625431	0.525824	0.446107	0.637572	0.690322	0.716557	0.56899	0.665659	0.729647	0.802079	0.610007	0.490016	0.682509	0.667822
Myl1	0	0.000548631	0	0.00292951	0.0024599	0	0.00179983	0.00204826	0.00133215	0.00113689	0.00312393	0.00435462	0.013663	0.0117804	0.00761585	0.0182678	0	0.00314458	0.00958966	0.00795507	0	0	0	0.00162994	0.000865928	0.00473035	0.000903761	0.0032228	0.00297639	0.000498777	0.00467753	0	0	0	0	0.00536965	0	0	0	0.00332728	0.00230438	0.00292045	0	0.0019271	0.00184705	0.00148322	0.00350905	0	0.00880416
Lancl1	0.324132	0.324903	0.309803	0.360902	0.309358	0.394627	0.446103	0.56147	0.38268	0.35299	0.339248	0.40522	0.459608	0.4317	0.420375	0.273683	0.468517	0.570876	0.546391	0.44434	0.34556	0.420278	0.464315	0.365332	0.334769	0.35197	0.391694	0.442522	0.383131	0.3204	0.248127	0.282477	0.250452	0.134643	0.302982	0.312257	0.39901	0.335963	0.312253	0.440834	0.37892	0.375655	0.419467	0.345022	0.380754	0.329864	0.334433	0.400182	0.372101
Cps1	0.00103576	0.00371492	0	0.00119842	0.00137216	0	0	0.000534665	0	0.00130407	0.00151651	0	0	0	0	0	0	0.00341984	0.00114594	0.00384472	0	0	0	0	0	0.00065997	0	0	0	0.000229563	0	0	0	0	0	0	0	0	0.00675709	0.00398755	0	0	0	0	0	0.00199077	0	0	0
Gm15668	0	0	0	0	0	0	0	0	0	0	0	0	0	0	0	0	0	0	0	0	0	0	0	0	0	0	0	0	0	0	0	0	0	0	0	0	0	0	0	0	0	0	0	0	0	0	0	0	0
Gm15669	0	0	0	0	0	0	0	0	0	0	0	0	0	0	0	0	0	0	0	0	0	0	0	0	0	0	0	0	0	0	0	0	0	0	0	0	0	0	0	0	0	0	0	0	0	0	0	0	0
Gm15671	0	0	0	0	0	0	0	0	0	0	0	0	0	0	0	0	0	0	0	0	0	0	0	0	0	0	0	0	0	0	0	0	0	0	0	0	0	0	0	0	0	0	0	0	0	0	0	0	0
Erbb4	0	0	0	0	0	0	0.00321019	0.00330065	0.00345509	0.00118504	0	0.000459673	0	0	0	0	0	0.00701815	0.00209462	0.00428573	0	0	0	0	0	0.00410027	0.00234692	0.00244453	0.00241735	0	0	0	0	0	0	0	0	0	0	0	0	0	0	0	0	0	0	0	0
Gm28497	0	0	0	0	0	0	0	0	0	0	0	0	0	0	0	0	0	0	0	0	0	0	0	0	0	0	0	0	0	0	0	0	0	0	0	0	0	0	0	0	0	0	0	0	0	0	0	0	0
Gm29113	0	0	0	0	0	0	0	0	0.00162215	0.00150828	0.00074774	0	0	0	0	0	0	0	0.000559441	0	0.00212143	0	0	0	0	0	0	0	0	0.000688574	0	0	0	0	0	0	0	0	0	0	0	0	0	0	0	0.00133951	0	0	0
Gm29114	0	0	0	0	0	0	0	0	0	0.000414302	0	0	0	0	0	0	0	0	0	0.000671036	0	0	0	0	0	0	0	0	0	0.000378542	0	0	0	0	0	0	0	0	0.00950462	0	0	0	0	0	0	0	0	0	0
Ikzf2	0.0467978	0.0370182	0.0441459	0.0468005	0.0484946	0.106334	0.0716323	0.0782607	0.154663	0.156555	0.163683	0.153779	0.176967	0.265366	0.219331	0.133555	0.0912138	0.124837	0.247103	0.194443	0.021268	0.0144354	0.0141616	0.0347286	0.0579645	0.0992679	0.0456429	0.0582178	0.103912	0.111309	0.170023	0.176381	0.159753	0.472157	0.265613	0.0443473	0.035489	0.0528239	0.0945127	0.0570698	0.0124006	0.00653858	0.0287931	0.017013	0.0267809	0.0196553	0.00376956	0.0260526	0.0416125
Spag16	0	0	0	0	0	0	0.00207661	0.0020267	0.00404795	0.00346462	0.00181227	0.00292576	0.00170613	0	0.00255034	0	0	0.000915492	0.00222572	0.00118786	0	0	0	0	0	0.00540566	0.000892897	0.00683622	0.00379858	0.00727608	0	0	0	0	0	0	0	0	0	0	0	0	0	0	0	0	0	0	0
Vwc2l	0	0	0	0	0	0	0	0	0	0	0	0	0	0	0	0	0	0	0	0	0	0	0	0	0	0	0	0	0	0	0	0	0	0	0	0	0	0	0	0	0	0	0	0	0	0	0	0	0
Bard1	0.0104649	0.00252113	0.00778634	0.00166774	0.00917763	0.00387625	0.00861265	0.00477334	0.00916763	0.00877305	0.00488301	0.00208294	0.00748273	0.00338277	0.0101989	0	0.00382628	0.00219491	0.0062468	0.00622439	0	0	0.00385849	0.00479754	0.0127154	0.0709028	0.0703605	0.0685917	0.0789539	0.077073	0	0	0.00633151	0.0237711	0.0166859	0.00630047	0.00843482	0.00915082	0.0273687	0.00102734	0.00736825	0.0020372	0.00656748	0.0015642	0.0100753	0.00256727	0.00654131	0.0110724	0.005276
Abca12	0	0	0	0	0	0	0	0	0	0	0	0	0	0	0.00171651	0	0	0	0	0	0	0	0	0	0	0.000843863	0	0.000788009	0.00215617	0	0	0	0	0	0	0	0	0	0	0	0.000727009	0	0	0	0	0	0	0	0
Atic	0.349909	0.386725	0.241831	0.243674	0.295549	0.533003	0.776604	0.666883	0.590992	0.520929	0.594655	0.669506	0.544248	0.58094	0.67176	0.473974	0.534125	0.632877	0.532654	0.628775	0.371085	0.407043	0.25707	0.238306	0.371045	0.871271	0.962389	0.856038	0.842959	0.749027	0.510692	0.621969	0.393611	0.305376	0.642394	0.437387	0.493144	0.300641	0.362154	0.402281	0.562202	0.642227	0.397387	0.528409	0.471683	0.402151	0.470774	0.301291	0.266711
Fn1	2.52487	1.48928	1.62184	1.67987	0.996844	0.0740574	0.0374815	0.035554	0.0556738	0.0615644	0.0352386	0.0121092	0.0299398	0.0095101	0.0168898	0.064071	0.026091	0.153383	0.345779	0.254862	1.90317	1.40765	2.58509	1.84416	1.67034	0.0194174	0.0141539	0.0208716	0.0138584	0.0285594	0.190771	0.0736903	0.0963208	0.144922	0.334992	0.953079	0.497645	0.462279	0.579552	0.211586	0.85285	0.616785	1.13452	1.78488	1.5929	2.05577	1.36498	2.85862	2.33839
Apol7d	0.0161254	0.00313039	0.00781123	0.0141579	0.00762148	0.0046011	0.00709388	0.00184389	0.00450615	0.00243516	0	0	0	0	0	0	0	0.00882678	0.0173201	0.00672824	0.0137802	0.00375899	0.0152659	0	0.0125607	0.00186258	0	0	0	0.00065044	0	0	0	0	0	0.00859989	0	0	0.0131754	0.00414385	0.0101353	0.00326928	0.00405248	0.0164815	0.0105535	0.00981834	0.00215683	0.00634926	0.018489
Gm8883	0	0	0	0	0	0	0	0	0	0	0	0	0	0	0	0	0	0	0	0	0	0	0	0	0	0	0	0	0	0	0	0	0	0	0	0	0	0	0	0	0	0	0	0	0	0	0	0	0
Gm28818	0.0129751	0	0.00117224	0.00512844	0	0	0	0	0.00191434	0	0.000660715	0	0	0	0	0	0	0	0	0.000841282	0.00973334	0	0	0.00267655	0	0.00115236	0	0	0	0	0	0	0	0.0241409	0	0.00199131	0	0	0	0	0	0	0	0	0	0	0	0	0
4933417E11Rik	0	0	0	0	0.00119028	0	0	0	0	0.000588789	0	0	0	0	0	0	0	0.000540537	0	0.000905742	0	0	0	0	0.00150384	0	0	0	0	0	0	0	0	0	0	0	0	0	0	0	0	0	0	0	0	0	0	0	0
4930556G22Rik	0	0	0	0	0	0	0	0	0	0	0	0	0	0	0	0	0	0	0	0	0	0	0	0	0	0	0	0	0	0	0	0	0	0	0	0	0	0	0	0	0	0	0	0	0	0	0	0	0
Gm4319	0	0	0	0	0	0	0	0.000582182	0	0.00183365	0	0	0	0	0	0	0	0.000572765	0.00104584	0.00249475	0	0	0	0	0	0	0	0	0	0	0	0.0101347	0	0	0	0	0	0	0	0	0	0	0	0	0	0	0	0	0
Mreg	0	0	0	0	0	0.00633542	0.003159	0.0183499	0.0484622	0.0206093	0.00120494	0	0	0	0.00123218	0	0	0.0438963	0.0827676	0.0577575	0	0	0	0	0.00181792	0.00343527	0.00276054	0.00169672	0.00771032	0.00616218	0	0.0102271	0	0.0336606	0.00663211	0	0	0	0	0	0	0	0	0.00150632	0.00107422	0.00118646	0	0	0
D230017M19Rik	0.0261968	0.0452143	0.0167272	0.0435484	0.0339827	0.0279636	0.0202568	0.0173702	0.0285039	0.0323042	0.0389761	0.0344317	0.0272048	0.0481559	0.0345274	0.0150959	0.0282889	0.0278936	0.0350618	0.0457275	0.0515958	0.0294044	0.0504281	0.0542192	0.0422294	0.0268747	0.024403	0.0197446	0.0146755	0.0282947	0.0423211	0.0531378	0.0525164	0.0588014	0.038068	0.0314096	0.0310332	0.013749	0.0657485	0.0377058	0.0197281	0.0290182	0.0197554	0.0431839	0.0176294	0.0295546	0.0288618	0.019876	0.0162491
Pecr	0.148045	0.106077	0.102263	0.11052	0.126875	0.199062	0.269958	0.269454	0.24422	0.203089	0.198728	0.193151	0.152533	0.166196	0.229729	0.165315	0.201892	0.140162	0.163487	0.15858	0.218313	0.162796	0.092066	0.117052	0.166583	0.223727	0.320757	0.328652	0.300887	0.270342	0.0983737	0.0676707	0.160518	0.017667	0.188411	0.185049	0.141006	0.067405	0.174472	0.178339	0.181788	0.179784	0.147391	0.176142	0.172124	0.145818	0.146666	0.102076	0.116051
Tmem169	0.00202751	0	0	0	0.00270345	0	0.00147067	0	0.00136646	0.000589657	0	0	0	0.00220332	0	0	0	0.000616463	0	0	0.00162723	0	0	0	0.00920511	0.000771697	0	0	0	0	0.00989576	0	0	0	0	0	0	0.00348571	0	0	0.00455163	0	0	0.00596379	0.00195041	0.0041274	0	0	0
Xrcc5	0.173616	0.138207	0.150252	0.18276	0.139485	0.424709	0.327165	0.317037	0.326552	0.29919	0.470835	0.471821	0.38098	0.489909	0.448803	0.24409	0.253496	0.361815	0.364158	0.336781	0.22552	0.183453	0.123973	0.141101	0.172734	0.446068	0.384254	0.35667	0.385391	0.384026	0.32335	0.257971	0.197224	0.209652	0.236251	0.233992	0.199742	0.130084	0.26155	0.269769	0.311278	0.268412	0.267506	0.355316	0.244026	0.227145	0.178001	0.214804	0.195913
March4	0	0	0	0	0	0	0	0	0.000939932	0.000627471	0	0	0	0	0	0	0	0	0.000897258	0	0	0	0	0	0	0	0	0	0	0	0	0	0	0	0	0	0	0	0	0	0	0	0.00122731	0	0	0	0.00123288	0	0
Smarcal1	0.112638	0.0468129	0.0643413	0.0891463	0.0937046	0.136276	0.116523	0.0662344	0.152746	0.207445	0.110474	0.107242	0.0901256	0.112464	0.147636	0.149691	0.109068	0.0663109	0.0903662	0.0917432	0.100583	0.0467235	0.0557884	0.0900002	0.0872492	0.119955	0.104145	0.115339	0.119834	0.170547	0.0689144	0.0379018	0.0716788	0.0633899	0.113134	0.0898942	0.0568956	0.0657955	0.0851219	0.0734618	0.099326	0.0566693	0.0776342	0.102219	0.097757	0.105515	0.0401677	0.0915342	0.0879631
Gm39662	0	0	0	0	0.00138192	0	0	0.000656332	0	0	0	0	0	0	0	0	0	0	0.000610423	0	0	0	0	0	0.00107773	0	0.0010519	0	0	0	0	0	0	0	0	0	0	0	0	0	0	0	0.00102362	0	0	0	0	0	0
Ankar	0	0	0	0	0	0	0	0	0	0	0	0	0	0	0.000990691	0	0	0	0	0.000666834	0	0	0	0	0	0	0	0	0	0	0	0	0	0	0	0	0	0	0	0	0	0	0	0	0	0	0	0	0
Rpl37a	32.011	33.6887	33.8685	27.7316	33.174	31.9167	36.0749	39.0629	31.1113	33.7171	30.7686	31.6038	29.0241	26.9666	30.9596	28.3986	38.148	38.635	28.9623	32.0146	35.9337	37.4309	39.1034	29.1316	34.1507	30.9103	32.3943	32.2884	29.1723	31.3428	7.56955	10.3768	13.8054	11.1862	12.1789	33.9251	31.5966	35.1483	28.9625	33.3972	40.1109	43.8243	40.4961	36.3259	40.3188	36.0742	34.641	36.1275	29.3747
Igfbp2	0.0264966	0.0247518	0.0138443	0.00828958	0.0197959	0.749064	0.666328	0.382786	0.599036	0.455911	1.13796	0.575927	0.719673	0.92725	0.99949	0.736902	0.442317	0.396624	0.613115	0.724515	0.059073	0.00619798	0.0353447	0.0131973	0.0311113	1.36212	0.76239	0.647419	0.689428	0.586617	0.92337	0.506197	0.3901	0.360247	0.380322	0.026343	0.0347109	0.0503482	0.00379365	0.0146616	0.0534859	0.0327048	0.060138	0.032493	0.0287126	0.0249498	0.00986049	0.019492	0.0122334
Igfbp5	4.4866	1.3232	0.809451	1.66334	1.05182	8.70244	0.466089	0.0402366	0.18801	0.144653	11.0043	6.69603	3.52986	6.12403	6.65749	13.1892	2.4487	0.133209	1.00485	0.73987	1.94128	0.919406	0.69843	0.633951	0.834668	5.79114	1.69307	0.334363	1.33588	0.97557	11.2689	3.06352	0.61502	0.838514	1.40102	3.51731	0.816482	0.234831	0.230611	0.271311	1.74875	0.457013	0.512806	0.756976	0.66168	3.01928	0.855352	0.564494	0.490853
1700027A15Rik	0	0	0	0	0	0	0	0	0	0	0	0	0	0	0	0	0	0	0	0	0	0	0	0	0	0	0	0	0	0	0	0	0	0	0	0	0	0	0	0	0	0	0	0	0	0	0	0	0
Tnp1	0	0	0	0	0	0	0	0	0	0	0	0	0	0	0	0	0	0	0	0	0	0	0	0	0	0	0	0	0	0	0	0	0	0	0	0	0	0	0	0	0	0	0	0	0	0	0	0	0
Gm29185	0	0	0	0	0	0	0	0	0	0	0	0	0	0	0	0	0	0	0	0	0	0	0	0	0	0	0	0	0	0	0	0	0	0	0	0	0	0	0	0	0	0	0	0	0	0	0	0	0
Pinc	0	0	0	0	0	0	0	0	0	0	0	0	0	0	0	0	0	0	0	0	0	0	0	0	0	0	0	0	0	0	0	0	0	0	0	0	0	0	0	0	0	0	0	0	0	0	0	0	0
D530049I02Rik	0	0	0	0	0	0	0	0	0	0	0	0	0	0	0	0	0	0	0	0	0	0	0	0	0	0	0	0	0	0	0	0	0	0	0	0	0	0	0	0	0	0	0	0	0	0	0	0	0
C530043A13Rik	0	0	0	0	0	0.00184996	0	0	0	0	0.00143825	0	0	0	0	0	0	0	0	0	0	0	0	0	0	0	0	0	0.00149042	0	0	0	0.00499841	0	0	0	0	0	0	0	0	0	0	0	0	0	0	0	0
Gm29186	0	0	0	0	0	0	0	0	0	0	0	0	0	0	0	0	0	0	0	0	0	0	0	0	0	0	0	0	0	0	0	0	0	0	0	0	0	0	0	0	0	0	0	0	0	0	0	0	0
6030407O03Rik	0.00724149	0.0104244	0.00756749	0	0.000358581	0.0630448	0.0292309	0.0132427	0.00812576	0.00595525	0.0735488	0.0795359	0.0358947	0.0487884	0.0623502	0.0797908	0.0175263	0	0	0	0.0110237	0.00498152	0.0065052	0.00966315	0.00367896	0.0676582	0.0485788	0.0146369	0.0503817	0.0344837	0.0239955	0.036172	0.00884089	0.0211182	0.0723936	0.0197138	0.0018933	0	0	0	0.0130746	0.00662554	0.0124198	0.0275301	0.0149915	0.0199181	0.0103393	0.00260432	0.00833746
Gm29183	0.000896257	0	0	0	0	0	0	0	0	0	0.000707354	0	0	0.0027647	0.00198908	0	0	0	0	0	0	0	0	0.00167538	0.00101595	0.00155471	0	0	0.00159735	0	0	0	0	0	0	0	0	0	0	0	0.00295122	0.00299884	0	0.0029795	0.00118719	0	0.00243027	0	0
Tns1	1.34377	0.85069	0.961674	1.4652	1.22313	0.0646853	0.0500438	0.223854	0.194714	0.128105	0.155208	0.120391	0.129662	0.129887	0.124948	0.310717	0.162748	0.318041	0.305722	0.271386	0.848436	0.569386	0.646648	0.742175	0.586105	0.118722	0.0751434	0.201219	0.149964	0.153435	0.308656	0.213203	0.455732	0.299918	0.154943	0.858736	0.769702	0.917025	0.712079	0.578356	0.584383	0.371176	0.416897	0.507384	0.541621	0.710546	0.529317	0.463632	0.645124
Rufy4	0.00938665	0.00128421	0	0.00223946	0.000864863	0	0.00139468	0.00555083	0.000926639	0.00676945	0.00113147	0.00120184	0.00208106	0.00195325	0.00301081	0	0	0.00660976	0.00364413	0.000876733	0.0026237	0.00686522	0	0.00316465	0	0.0016722	0.00430962	0.00528488	0.00211297	0.0030122	0	0.00819342	0.0187155	0	0.00349366	0	0	0	0	0.00473745	0	0	0	0	0	0	0	0.00667214	0.00295391
Cxcr2	0.00194145	0	0	0	0.00186656	0.00245553	0	0.00121488	0.00133737	0.00403658	0.00110362	0.00093762	0.00190147	0.00206943	0.00789993	0	0	0.00254085	0.000671855	0.00321464	0.00763224	0	0.00709155	0	0.00030876	0.000749605	0.00226639	0.0022751	0.00127457	0.00496554	0	0	0.00337591	0	0.0456568	0.00316355	0.00208486	0.011052	0.007003	0.00492661	0.00149007	0.00379439	0	0.00763194	0.0021646	0.00294985	0.00185438	0.00500935	0
Cxcr1	0	0	0	0	0	0	0	0	0	0	0	0	0	0	0	0	0	0	0	0	0	0	0	0	0	0	0	0	0	0	0	0	0	0	0	0	0	0	0	0	0	0	0	0	0	0	0	0	0
Arpc2	3.24546	3.35311	2.84951	2.73542	3.03646	2.40119	2.32711	2.11955	2.06681	2.27786	2.84339	3.31718	2.67625	2.9057	2.50289	3.37509	2.82298	2.77556	2.86208	2.94853	2.40564	2.19947	1.77289	1.70632	2.09893	2.57382	2.86025	2.36719	2.19759	2.35627	1.28	1.09183	1.09995	0.453037	1.09898	3.14652	3.35653	2.62846	2.2494	2.34115	2.22205	2.74214	2.29456	2.20282	2.12959	2.51037	2.80516	2.20571	2.27288
Gpbar1	0	0	0.00646585	0.00141948	0.0018923	0	0	0	0.000831087	0	0	0	0	0	0	0	0	0	0	0	0	0	0	0	0	0	0	0	0.00065094	0	0	0	0	0	0	0	0	0	0	0	0.00363934	0.0032972	0.00157114	0	0.00145691	0	0.00139451	0	0
Aamp	1.25482	1.68241	1.11149	1.00161	1.10843	1.49887	1.83799	1.27359	1.1876	1.29461	1.79436	2.41318	1.51326	1.35123	1.37027	1.60846	1.9384	1.37017	1.32997	1.36359	1.42842	1.84684	1.14871	1.02777	1.25343	1.476	2.05659	1.25068	1.14579	1.2408	1.19569	1.68534	1.20055	0.448959	0.709192	1.51662	2.1229	1.24156	0.989556	1.21297	1.47998	1.96707	1.37431	1.4162	1.40937	1.40011	1.90281	1.21788	1.22131
Gm28364	0	0	0	0	0	0	0	0.000449302	0	0	0	0.00203664	0	0	0	0	0	0	0	0	0	0	0	0	0.000585004	0	0	0	0	0	0	0	0	0	0	0	0	0	0	0	0	0	0	0	0	0	0	0	0
Pnkd	0.930314	1.21525	0.977594	0.934248	0.944505	0.721705	0.893269	0.630483	0.550896	0.608585	0.786576	1.02995	0.882053	0.744898	0.768701	0.638039	0.971634	0.615581	0.591108	0.634598	0.56318	1.04574	0.607352	0.57912	0.79295	0.737091	0.955392	0.678009	0.547575	0.710712	0.399969	0.461167	0.348541	0.206105	0.367454	0.706112	1.1396	0.883838	0.634117	0.857665	0.612733	0.96959	0.751543	0.577046	0.682645	0.608332	0.93423	0.788057	0.628082
Tmbim1	0.412649	0.561305	0.348538	0.448436	0.36234	0.176087	0.17788	0.185846	0.172674	0.16858	0.124269	0.142186	0.1411	0.175273	0.139156	0.240582	0.366505	0.236973	0.276176	0.236943	0.57992	0.56421	0.474757	0.515014	0.38881	0.0993792	0.172447	0.154279	0.115698	0.139707	0.253608	0.307753	0.288169	0.0333198	0.203936	0.481126	0.619905	0.391477	0.382636	0.318392	0.482107	0.647479	0.409545	0.576163	0.321444	0.611715	0.818417	0.501716	0.707982
Catip	0.0143092	0.0218324	0.0216923	0.0215441	0.015565	0.00472228	0	0.00274559	0.00212821	0.0064472	0.00146787	0.00101519	0.00429625	0	0	0	0	0.00313411	0.00409239	0.00737236	0.0221999	0.00326272	0.0274912	0.01045	0.0199419	0.00101277	0.00185844	0	0.000902152	0	0	0.00780636	0.00419148	0	0	0.0137651	0.0106202	0	0	0.0181948	0.017127	0.0080231	0.0108053	0.0264192	0.0122783	0.0142363	0.0100765	0.00901072	0.0111089
Slc11a1	0.00377666	0.00193942	0.00232732	0	0.00169036	0	0.00137689	0	0	0.00215899	0	0	0	0.00473461	0	0	0	0.000596663	0	0	0	0.00225146	0.0037294	0	0	0	0	0.000843653	0	0	0.00563453	0	0.00357975	0	0	0	0	0	0	0	0.00289584	0.00108357	0	0	0	0.000807589	0.0039951	0	0.00240482
Ctdsp1	0.397145	0.493298	0.479195	0.501582	0.52023	0.257932	0.254757	0.263671	0.266412	0.267676	0.270244	0.262805	0.291595	0.346203	0.290454	0.373114	0.332678	0.260669	0.29597	0.296126	0.456884	0.515461	0.535673	0.489093	0.494665	0.271027	0.214506	0.266379	0.236887	0.237931	0.383509	0.313728	0.238318	0.231301	0.155524	0.420658	0.443547	0.478674	0.401447	0.507287	0.395977	0.372547	0.33849	0.327508	0.386244	0.452207	0.415208	0.368899	0.37054
Vil1	0	0.00144907	0.00179277	0	0.00051285	0	0.00126846	0.00517844	0.00573809	0.00658139	0.00500584	0.00257196	0.00318065	0.00192013	0.00108791	0	0	0.00181142	0.00516336	0.00101015	0.00256359	0	0	0.00388842	0.00108679	0.000971451	0.00225885	0.00203315	0.00529899	0.00536713	0	0	0.00510897	0	0	0.00103857	0.00220577	0.00418226	0.0191315	0	0.00184817	0	0.00303229	0.00862478	0	0.00641365	0.00634063	0.00256472	0.00263295
Usp37	0.300808	0.460909	0.364167	0.353594	0.214503	0.392912	0.304401	0.178059	0.289333	0.272228	0.330919	0.381813	0.335595	0.458885	0.391889	0.423037	0.28221	0.180147	0.284196	0.224067	0.314404	0.441191	0.325873	0.452192	0.251209	0.677744	0.57335	0.452211	0.572375	0.604096	0.515467	0.469903	0.35818	0.538488	0.297848	0.473354	0.643076	0.494871	0.480543	0.267221	0.310792	0.400749	0.326316	0.408476	0.210132	0.371233	0.505508	0.403761	0.584151
Cnot9	0.0633578	0.0870163	0.0951656	0.0603966	0.118232	0.105981	0.129358	0.101795	0.122307	0.121895	0.121409	0.123113	0.134718	0.0932015	0.109864	0.138186	0.069223	0.124623	0.110631	0.141855	0.0913181	0.108197	0.114183	0.0999471	0.114657	0.211311	0.221796	0.209119	0.224423	0.199294	0.0726977	0.0887866	0.0558901	0.0122331	0.0687795	0.0822409	0.111858	0.0747755	0.0731129	0.147614	0.116032	0.10182	0.153706	0.0900776	0.145395	0.0719428	0.0854524	0.113486	0.0956351
Plcd4	0.00491888	0.016678	0.00128364	0.00627721	0.00227437	0	0.00119319	0.000992287	0	0.00288668	0.00067816	0	0.00628592	0	0.00732636	0.0142096	0	0.00313903	0.00508937	0.00611201	0.00396627	0.00909475	0.00180451	0.0102436	0.00552707	0.00246462	0.00243012	0.000947233	0.00196564	0.00446547	0.00633467	0.0347799	0.0199496	0	0.0363571	0.00430172	0.0110772	0	0.00422086	0.00259184	0.00692993	0.0063809	0.00483548	0.00755334	0.00248605	0.00677824	0.00556838	0.0102012	0.00915424
Zfp142	0.179656	0.222337	0.175013	0.143148	0.114333	0.122023	0.133937	0.107975	0.107956	0.141594	0.0867917	0.109815	0.132208	0.0967862	0.122145	0.0793094	0.112763	0.131139	0.13132	0.126759	0.163013	0.162745	0.227365	0.122798	0.122428	0.0842433	0.102428	0.106298	0.0976303	0.107032	0.235809	0.305161	0.219888	0.25148	0.166264	0.159554	0.202946	0.214922	0.21057	0.122888	0.16549	0.20387	0.181248	0.132643	0.110261	0.164373	0.193419	0.183423	0.145467
Bcs1l	0.11805	0.143672	0.129011	0.144849	0.109851	0.0791616	0.111626	0.159785	0.129808	0.0998204	0.126153	0.120686	0.0988428	0.0929336	0.140299	0.0956812	0.0869374	0.0995036	0.0961246	0.0969954	0.138789	0.142461	0.122616	0.0984175	0.117248	0.110681	0.107997	0.145051	0.127709	0.125281	0.080327	0.0824202	0.0443744	0.0251367	0.138776	0.130495	0.119271	0.125935	0.116705	0.138331	0.144833	0.144397	0.175741	0.165815	0.144324	0.118762	0.170216	0.128585	0.13351
Rnf25	0.0847638	0.088324	0.12047	0.0935587	0.134603	0.117822	0.0813586	0.143029	0.0948904	0.139063	0.160547	0.14045	0.238902	0.120647	0.160832	0.139894	0.157091	0.106535	0.0862896	0.140172	0.11171	0.136793	0.191553	0.0806738	0.136712	0.131878	0.108498	0.104947	0.0999153	0.118954	0.188741	0.168571	0.0946555	0.0850854	0.0860173	0.0879236	0.0881944	0.128169	0.0631699	0.133653	0.0860013	0.0996119	0.109724	0.0853897	0.126246	0.0844096	0.0772255	0.104927	0.0799424
Stk36	0.0132483	0.0160703	0.0234564	0.019891	0.0208134	0.0234722	0.0129878	0.0131621	0.0229499	0.0151981	0.0307053	0.0174273	0.0191618	0.0162215	0.0273477	0.0232669	0	0.0251176	0.0251803	0.0217283	0.0263239	0.00698522	0.0149697	0.0116209	0.00830604	0.0142715	0.0132337	0.0088971	0.00626819	0.00806874	0.00548966	0.0279167	0.0394506	0.0170851	0.0109096	0.00924183	0.0282275	0.0277736	0.0235306	0.0187704	0.01196	0.0155441	0.0158635	0.00861984	0.0147268	0.00907578	0.0165932	0.00717837	0.0197246
Ttll4	0.0523145	0.0469386	0.0547795	0.0774457	0.0711705	0.0868694	0.139863	0.0561753	0.100493	0.114683	0.115085	0.103925	0.122663	0.123826	0.143968	0.0950032	0.0708533	0.0709864	0.0961021	0.0997529	0.0779201	0.0589184	0.0402348	0.102478	0.0649045	0.141739	0.109774	0.106614	0.148839	0.150256	0.28412	0.329312	0.204789	0.254058	0.162134	0.0894028	0.108707	0.0686445	0.0747137	0.0743654	0.0730942	0.0628455	0.0797205	0.102225	0.105999	0.0887365	0.0837007	0.0590669	0.0838259
Cyp27a1	0.190787	0.0853997	0.127086	0.271177	0.213499	0.0408101	0.0220853	0.0407722	0.0772318	0.0752112	0.0104565	0.012993	0.0236587	0.0250438	0.0147231	0.0142096	0.0307013	0.0403477	0.102421	0.11764	0.320136	0.187767	0.223793	0.349072	0.27533	0.0145281	0.00946046	0.0154269	0.0286179	0.0162972	0.0286921	0.00769916	0.0444645	0.133055	0.0915183	0.229464	0.207529	0.223239	0.258499	0.313046	0.305092	0.0820436	0.0718643	0.227097	0.124977	0.249905	0.175801	0.214501	0.264638
Prkag3	0.00433756	0	0	0.0023669	0.00181506	0	0	0	0.000823497	0	0	0	0.00397558	0	0	0	0	0.00052488	0	0.00218872	0.00402283	0	0	0	0	0.00150734	0	0.000597251	0.00103377	0	0	0	0	0	0	0	0.000813551	0	0	0	0.0114019	0	0.00139192	0.00344296	0.00295807	0	0	0	0.00187592
Wnt6	0.0549073	0.0533588	0.038701	0.0468699	0.0407216	0.093501	0.0367431	0.0149544	0.0197664	0.0253997	2.93977	1.86516	1.89351	2.24407	2.41686	0.658802	0.254053	0.0672962	0.101826	0.0942115	0.0600581	0.0455672	0.0987602	0.071107	0.0467658	1.54461	0.430173	0.182844	0.223605	0.280036	1.21997	0.415487	0.213047	0.0954375	0.391855	0.0707028	0.0654766	0.0463897	0.0317502	0.0556377	0.0894803	0.051573	0.0779845	0.0869734	0.0649325	0.0262782	0.0323516	0.0235117	0.0340667
Gm29539	0.000462487	0	0	0	0	0.00173202	0	0	0	0.00148216	0.00247233	0.000800031	0	0.00552247	0.00472534	0	0	0	0	0.000488579	0.00112785	0	0	0	0	0.00209403	0	0.00326802	0.00103115	0.002137	0	0.041671	0	0	0.00674087	0	0	0	0	0	0	0	0	0.0012914	0	0	0	0	0
Wnt10a	0	0	0	0	0	0	0	0	0.00147753	0.000654536	0.00183822	0.00243018	0.0029562	0	0	0	0	0	0.00136957	0.000465124	0	0	0	0	0	0.000439448	0	0.000933168	0	0	0	0	0	0	0	0	0	0	0	0	0	0	0	0.00183298	0	0	0	0	0
Cdk5r2	0	0	0	0	0	0	0	0	0	0	0	0	0	0	0	0	0	0	0	0	0.00350941	0	0	0	0.000671303	0	0	0	0	0	0	0	0	0	0	0	0	0	0	0	0	0	0	0	0	0	0	0	0
Fev	0	0	0	0	0	0	0	0	0	0	0	0	0	0	0	0	0	0	0	0	0	0	0	0	0	0	0	0	0	0	0	0	0	0	0	0	0	0	0	0	0	0	0	0	0	0	0	0	0
Cryba2	0	0	0	0	0	0	0	0	0	0	0	0	0	0	0	0	0	0	0.000533695	0	0	0	0	0	0	0	0	0	0	0	0	0	0	0	0	0	0	0	0	0	0	0	0	0	0	0	0	0	0
Cfap65	0	0	0	0	0	0	0	0	0.00122273	0	0	0	0	0	0.00121677	0	0	0	0	0	0	0	0	0	0	0	0.000750049	0	0	0	0.00523322	0	0	0	0	0	0	0	0	0	0	0	0	0	0	0	0	0	0
Gm15841	0	0	0	0	0	0	0	0	0	0	0	0	0	0	0	0	0	0	0	0	0	0	0	0	0	0	0	0	0	0	0	0	0	0	0	0	0	0	0	0	0	0	0	0	0	0	0	0	0
Ihh	0.015342	0.022816	0.0260674	0.00755874	0.0386744	1.29283	0.736474	0.318971	0.605221	0.848469	0.434803	0.632858	0.862947	0.581289	0.797875	0.136484	0.375014	0.146946	0.155587	0.158092	0.0163077	0.0287784	0.015321	0.00759668	0.02692	1.15737	1.11386	1.01453	0.938923	1.32414	0.636723	0.719783	0.547687	0.255638	0.763874	0.0217126	0.031186	0.008252	0.0114219	0.0221973	0.00877202	0.0126998	0.0057048	0.0210512	0.00821906	0.0121297	0.0250248	0.00819152	0.0141783
Nhej1	0.0524114	0.0394166	0.0592588	0.0466185	0.0606272	0.133258	0.142678	0.0975176	0.0773284	0.0623593	0.181423	0.23501	0.254035	0.184766	0.248208	0.0407712	0.0290088	0.0529216	0.0398041	0.0554507	0.0259337	0.0768527	0.024957	0.0326645	0.062524	0.203836	0.198859	0.173662	0.174807	0.166747	0.110705	0.0990141	0.0518075	0.0122331	0.100928	0.0469865	0.0491164	0.0594077	0.0123198	0.0387957	0.0475321	0.0488097	0.0470135	0.0451189	0.0473496	0.0429502	0.033797	0.0489869	0.0404397
Slc23a3	0.016163	0.00765748	0.00675101	0.0157624	0.00594169	0	0.00104236	0.00107753	0.00434718	0.00282531	0.00247116	0.000548384	0	0.00257411	0	0	0.0158855	0.00152003	0.00523295	0.00281548	0.0230391	0.0188798	0.0113287	0.00488956	0.00260327	0.00253733	0	0.00253637	0.00454522	0.000657153	0	0	0	0	0	0.033836	0.0220583	0.0227862	0.0134291	0.00353135	0.00564163	0.0126153	0.00498056	0.0167028	0	0.0165195	0.0144172	0.0219911	0.0214562
Cnppd1	0.215814	0.193017	0.235534	0.244878	0.24553	0.208973	0.190788	0.256954	0.266046	0.290743	0.233464	0.252026	0.281473	0.221371	0.190315	0.237828	0.316393	0.343391	0.316201	0.350568	0.21698	0.274537	0.344845	0.244624	0.261797	0.220884	0.182149	0.195968	0.185693	0.190803	0.242065	0.230598	0.342364	0.224764	0.280859	0.233222	0.310082	0.326568	0.244286	0.276408	0.214166	0.222551	0.218179	0.202397	0.17731	0.223916	0.268768	0.198443	0.304624
Retreg2	0.301808	0.344107	0.451936	0.253951	0.36111	0.432207	0.404962	0.477785	0.345831	0.41113	0.48836	0.575148	0.746399	0.453716	0.517898	0.699528	0.656568	0.585969	0.43891	0.565472	0.35298	0.417866	0.556308	0.418481	0.545349	0.529117	0.522409	0.519459	0.362417	0.386778	0.548254	0.375833	0.452278	0.237854	0.254583	0.404402	0.643284	0.721738	0.402842	0.547309	0.311032	0.409195	0.470768	0.320536	0.360257	0.337204	0.575899	0.499795	0.286235
Zfand2b	0.134114	0.179816	0.206282	0.178262	0.205077	0.0949548	0.13839	0.154012	0.138489	0.15087	0.125073	0.16855	0.168186	0.105026	0.129049	0.163394	0.139165	0.192307	0.153145	0.144869	0.198983	0.222877	0.287178	0.194376	0.216205	0.111218	0.121566	0.152599	0.0939885	0.1106	0.133521	0.111382	0.170435	0.0540718	0.148318	0.141047	0.197217	0.294128	0.173268	0.230931	0.173004	0.228408	0.243972	0.138887	0.201639	0.155451	0.189727	0.249347	0.141314
Abcb6	0.0631929	0.0428088	0.0632967	0.0432722	0.062746	0.0885491	0.126558	0.10831	0.119998	0.10469	0.0737632	0.0719966	0.0746864	0.0670432	0.1053	0.109755	0.0955906	0.0598641	0.057271	0.102447	0.0870784	0.0671946	0.0341483	0.0769371	0.0677301	0.132066	0.141426	0.164018	0.186279	0.174607	0.0967396	0.168417	0.171975	0.0139784	0.127603	0.0567938	0.0897596	0.0815608	0.0508431	0.099302	0.102178	0.0810842	0.0811779	0.123474	0.0816029	0.0967995	0.0791332	0.085687	0.0493091
Atg9a	0.139051	0.234579	0.204203	0.16722	0.111514	0.106646	0.157164	0.138955	0.131355	0.141508	0.0842556	0.126563	0.191394	0.120504	0.102439	0.0853915	0.116565	0.169016	0.155184	0.158973	0.16546	0.195441	0.186826	0.209639	0.143326	0.0844783	0.104275	0.129224	0.113297	0.114743	0.199669	0.193552	0.268152	0.475548	0.185002	0.127151	0.223563	0.148249	0.236204	0.195155	0.141837	0.151786	0.171479	0.137915	0.130002	0.140135	0.172899	0.175969	0.183737
Ankzf1	0.0791232	0.0785187	0.0626237	0.0872874	0.0910159	0.181868	0.169559	0.145607	0.148028	0.177499	0.133211	0.177646	0.131874	0.132092	0.173389	0.0617037	0.0982186	0.144594	0.147857	0.151558	0.0550814	0.120363	0.0580039	0.0701357	0.129287	0.110349	0.115976	0.130873	0.137329	0.129361	0.0375698	0.212817	0.109109	0.0712197	0.138002	0.0562171	0.103031	0.122891	0.0624045	0.154515	0.0746858	0.0601667	0.0893687	0.092389	0.115322	0.0510326	0.0654334	0.068971	0.0678128
Glb1l	0.0898806	0.105972	0.0752936	0.106721	0.0754903	0.043806	0.0203275	0.0332763	0.037735	0.0335169	0.0515549	0.0462613	0.0649393	0.0595219	0.0648916	0.149338	0.0695755	0.0428683	0.0576043	0.059633	0.0674583	0.0857723	0.0979517	0.0687852	0.0720103	0.0411188	0.028634	0.0225601	0.0280188	0.0274603	0.0804599	0.074807	0.0903699	0.0448656	0.105802	0.0795402	0.0549627	0.121851	0.13492	0.0940732	0.0829273	0.064832	0.124903	0.0736432	0.066051	0.0959106	0.0706008	0.075818	0.112049
Stk16	0.460558	0.437285	0.415683	0.427537	0.496286	0.379042	0.418715	0.401897	0.406272	0.480809	0.419754	0.509564	0.639516	0.418906	0.562769	0.450886	0.317552	0.394916	0.356402	0.525194	0.373608	0.481696	0.426117	0.290157	0.563488	0.415827	0.454133	0.510101	0.356158	0.493022	0.371231	0.501926	0.351809	0.322946	0.463497	0.387027	0.451617	0.397211	0.327139	0.558756	0.401715	0.498037	0.60317	0.498291	0.611406	0.421827	0.417252	0.473269	0.328864
Tuba4a	0.0383028	0.232027	0.211624	0.148962	0.0940554	0.0459399	0.0383035	0.0397183	0.0599365	0.0479868	0.0321108	0.034699	0.0478703	0.0411553	0.0378734	0.0449291	0.0559344	0.0672543	0.0994619	0.06867	0.0372114	0.180293	0.126707	0.110308	0.0536314	0.0436939	0.0482211	0.0749689	0.0976112	0.0571931	0.0154323	0.0270093	0.0373775	0.0483713	0.0792557	0.0709067	0.245784	0.265498	0.170379	0.0908019	0.0227881	0.114382	0.0775246	0.0266183	0.0234423	0.0715714	0.318916	0.226719	0.203989
A630095N17Rik	0	0	0	0	0	0	0	0	0	0	0	0	0	0	0	0	0	0	0	0	0	0	0	0	0	0	0	0	0	0	0	0	0	0	0	0	0	0	0	0	0	0	0	0	0	0	0	0	0
Dnajb2	0.249683	0.347794	0.286445	0.311296	0.353655	0.189742	0.257934	0.232866	0.235387	0.246981	0.240858	0.398618	0.378927	0.243331	0.313067	0.354472	0.361381	0.287681	0.24031	0.314034	0.224519	0.23412	0.253773	0.269161	0.329123	0.211647	0.276168	0.269735	0.196861	0.236103	0.178278	0.334238	0.321352	0.216011	0.24785	0.241784	0.44866	0.46234	0.253115	0.381977	0.187757	0.305193	0.228576	0.190336	0.195042	0.250548	0.467084	0.27989	0.325374
Ptprn	0.00298126	0.013202	0.00493463	0.00390789	0.00707895	0	0	0.00165496	0.00148362	0.00204607	0.000723012	0	0.00248292	0	0.00406057	0	0	0.0107064	0.00896174	0.00378457	0	0	0.00691173	0.0100059	0.00259278	0.000810771	0.00114149	0.00116707	0	0.00123228	0.0243936	0	0	0.0217124	0	0.00510312	0.0167711	0.00321156	0	0	0.000840776	0.00673883	0.0190081	0.0113973	0.00620458	0.00108466	0.00839546	0.0151619	0.0173891
Gm28294	0	0	0	0	0	0	0	0	0	0	0	0	0	0	0	0	0	0	0	0	0	0	0	0	0	0	0	0	0	0	0	0	0	0	0	0	0	0	0	0	0	0	0	0	0	0	0.00252596	0	0
Resp18	0	0	0	0	0	0	0	0	0	0.000359221	0.000658495	0	0	0	0	0	0	0	0	0	0	0	0	0	0	0	0	0	0	0	0	0	0	0	0	0.00158579	0	0	0	0	0	0	0	0.00179339	0	0	0	0	0
Gm28902	0	0	0	0	0	0	0	0	0	0	0	0	0	0	0	0	0	0	0	0	0	0	0	0	0	0	0	0	0	0	0	0	0	0	0	0	0	0	0	0	0	0	0	0	0	0	0	0	0
Dnpep	0.515035	0.408883	0.610754	0.627886	0.580357	0.730947	0.730806	0.816249	0.85718	0.801165	0.642161	0.549152	0.556743	0.465121	0.506739	0.716439	0.488236	0.871052	0.787927	0.751278	0.533246	0.436971	0.639248	0.458555	0.651016	0.61537	0.701591	0.924339	0.654893	0.672778	0.467832	0.344588	0.415794	0.238943	0.360231	0.377802	0.453794	0.457002	0.398035	0.461627	0.483427	0.530552	0.631536	0.55593	0.582563	0.450292	0.442492	0.590043	0.578005
Des	2.17493	2.26078	0.881011	0.917746	0.210345	0.0138828	0.00675197	0.0138675	0.00515341	0.00504939	0.0231837	0.00918232	0.00665257	0.0108244	0.00306135	0.0234181	0.0135424	0.0179895	0.0124875	0.0126068	0.227121	0.0734185	0.144947	0.186288	0.121369	0.0171439	0.0128203	0.015381	0.0181518	0.010457	0.151522	0.0514742	0.0206772	0.0277806	0	0.0915775	0.107519	0.0770734	0.0610575	0.052713	0.347107	0.258778	0.30027	0.270255	0.295836	0.0900039	0.0593921	0.04962	0.0584387
Gm15179	0	0	0	0	0	0	0	0	0	0	0	0	0	0	0	0	0	0	0	0	0	0	0	0	0	0	0	0	0	0	0	0	0	0	0	0	0	0	0	0	0	0	0	0	0.000998956	0	0	0	0
Speg	0.668379	0.609375	0.619843	0.533061	0.515628	0.0255612	0.00995518	0.00816909	0.0122761	0.0204091	0.0297913	0.0337536	0.0426046	0.0288651	0.0120855	0.0227978	0.0391975	0.0291984	0.0273747	0.0321205	0.152318	0.110193	0.110105	0.115426	0.105878	0.0230592	0.00878278	0.0158132	0.00298325	0.0148488	0.0563904	0.0256261	0.0356216	0.209552	0.0587151	0.0880158	0.0913527	0.0688599	0.0802546	0.0876888	0.12996	0.101311	0.168576	0.107173	0.105168	0.106863	0.0789208	0.142806	0.0886481
Gm15178	0	0	0	0.000738986	0	0	0	0	0	0	0	0	0	0	0	0	0	0	0	0	0	0	0	0	0	0	0	0	0	0	0	0	0	0	0	0	0	0	0	0	0	0	0	0	0	0	0	0	0
Gmppa	0.214124	0.235461	0.253498	0.173594	0.171392	0.218271	0.231222	0.269405	0.188917	0.1928	0.1806	0.206972	0.195562	0.139466	0.154756	0.0820833	0.230586	0.183132	0.177168	0.156127	0.189059	0.300272	0.190913	0.212192	0.180283	0.173447	0.263202	0.292616	0.214524	0.202701	0.0783627	0.0913584	0.20423	0.117104	0.120864	0.166833	0.225792	0.248895	0.19884	0.183024	0.24066	0.238525	0.299075	0.218188	0.223572	0.21577	0.243889	0.24627	0.221083
Asic4	0.00367671	0.00264126	0.000638739	0	0	0.00413281	0.00329639	0.00193584	0.00903322	0.00609632	0.00584482	0.0500741	0.0296537	0.0308222	0.0338503	0	0	0.00110576	0.00270764	0.00235083	0	0	0	0.00208647	0	0.0041962	0.0203498	0.015319	0.0127118	0.00524135	0.00868899	0.0239928	0.0126395	0	0.0281894	0	0	0	0	0.000955526	0	0	0	0	0	0	0	0	0
Chpf	0.458043	0.508932	0.405231	0.275645	0.327959	0.345377	0.395661	0.369412	0.309078	0.384955	0.29218	0.412274	0.525608	0.312412	0.303553	0.357177	0.493184	0.390672	0.385316	0.425789	0.558624	0.69503	0.476811	0.309078	0.446804	0.376681	0.416655	0.594581	0.362341	0.422166	0.632443	0.653924	0.55362	0.370966	0.48689	0.362977	0.542059	0.430756	0.276509	0.37295	0.588761	0.676174	0.690484	0.409159	0.525151	0.600189	0.770432	0.63143	0.43209
Obsl1	0.351923	0.283592	0.23944	0.150888	0.162346	1.52085	1.925	1.51239	1.3453	1.40992	1.13732	1.23677	1.30453	0.927227	1.00552	1.23622	1.21696	1.12954	0.917336	0.80397	0.400305	0.332652	0.322733	0.185432	0.23594	1.20131	1.42837	1.82061	1.30299	1.34049	2.54663	2.45544	1.84905	1.27727	1.35992	0.467244	0.481443	0.519021	0.38623	0.395384	0.295029	0.247558	0.260906	0.154911	0.220424	0.352132	0.426319	0.454891	0.193696
Tmem198	0.00770258	0.0170274	0.0266254	0.00848809	0.0183566	0.0214988	0.0328811	0.0248241	0.0272185	0.028649	0.00819597	0.0357711	0.0468429	0.0205401	0.0252309	0.0286322	0.00554353	0.0315195	0.0331685	0.0259507	0.0093953	0.0292776	0.0224769	0.00472256	0.0150512	0.00604685	0.013685	0.0147548	0.0098131	0.0214413	0.0218012	0.0830403	0.0244813	0	0.0750207	0.0169572	0.023796	0.0225039	0.017434	0.0165562	0.0115704	0.0225308	0.0278301	0.00522199	0.00811661	0.0187006	0.0232089	0.00996721	0.0213452
Inha	0.625173	1.53237	1.74053	0.335232	0.809958	87.7657	86.941	56.2791	57.1799	62.4186	16.3938	24.5029	27.2154	16.8225	18.2008	28.8673	32.8135	20.2931	15.5735	17.8889	0.614406	1.43916	2.31825	0.405496	1.31581	34.5074	59.9366	61.884	45.7914	48.5231	23.3198	38.6071	42.3858	8.37173	35.5705	0.576104	1.71888	2.11441	0.628975	1.13436	0.510514	0.74227	1.19723	0.34521	0.568422	0.554116	1.30908	1.72097	0.44683
Stk11ip	0.0405983	0.0210557	0.0377778	0.0267964	0.0377649	0.0684843	0.106704	0.0829667	0.068537	0.0701872	0.0679095	0.066139	0.0621256	0.0505158	0.0744151	0.0468648	0.049039	0.0704196	0.0853363	0.0841162	0.0466545	0.0146297	0.0270307	0.0317914	0.0246268	0.0768042	0.0681705	0.0909268	0.0783069	0.0711473	0.0557762	0.221936	0.100903	0.101558	0.0422721	0.0290547	0.022856	0.0132371	0.0115673	0.0145786	0.0346054	0.0317854	0.0468979	0.0319999	0.0521659	0.0397822	0.0254	0.0405597	0.0249349
Slc4a3	0.371361	0.289557	0.200094	0.162897	0.111584	0.191105	0.253115	0.142363	0.139828	0.156403	0.170465	0.218772	0.246333	0.111354	0.117762	0.235642	0.287031	0.138532	0.140304	0.104852	0.137648	0.147404	0.127389	0.0630172	0.0687634	0.108092	0.141	0.107903	0.113917	0.106418	0.453522	0.717337	0.365518	0.350345	0.185253	0.138007	0.242848	0.287566	0.164855	0.110728	0.0933378	0.0828038	0.0807425	0.0373857	0.053609	0.110496	0.152164	0.158998	0.101175
Gm29065	0	0	0	0	0	0	0	0	0	0	0	0	0	0	0	0	0	0	0	0	0	0	0	0	0	0	0	0	0	0	0	0	0	0	0	0	0	0	0	0	0	0	0	0	0	0	0	0	0
Gm29069	0	0	0	0	0	0	0	0	0	0	0	0	0	0	0	0	0	0	0	0	0	0	0	0	0	0	0	0	0	0	0	0	0	0	0	0	0	0	0	0	0	0	0	0	0	0	0	0	0
Gm17751	0	0	0	0	0	0	0	0	0	0	0	0	0	0	0	0	0	0	0	0	0	0	0	0	0	0	0	0	0.00135477	0	0	0	0	0	0	0	0	0	0	0	0	0	0	0	0	0	0	0	0
Gm816	0	0	0	0	0	0	0	0.000546427	0	0	0	0	0	0	0	0	0	0	0	0	0	0	0	0	0	0	0	0	0	0	0	0	0	0	0	0	0	0	0	0	0	0.0010454	0	0	0	0	0	0	0
Epha4	0.0274376	0.0205547	0.0211568	0.0208979	0.00910103	0.301247	0.309347	0.212916	0.169575	0.123669	0.122482	0.0588809	0.0580413	0.0219374	0.0544863	0.141121	0.0640654	0.0500075	0.0172188	0.0374199	0.0315473	0.0703933	0.0479409	0.0481217	0.0720315	0.105243	0.128303	0.106531	0.0530109	0.079917	0.150891	0.244912	0.247984	0.148282	0.051465	0.0275062	0.0507201	0.0327801	0.0305425	0.0104184	0.0255724	0.0156771	0.0176368	0.025779	0.00622037	0.0469112	0.053712	0.073517	0.0756445
Gm28386	0.0058325	0	0	0.00246521	0	0	0.00116165	0.00310519	0	0.00237014	0	0	0	0	0	0	0.00743977	0.000439038	0	0	0	0	0.00494764	0.00169475	0	0	0.00096774	0.0010068	0	0	0	0	0	0	0	0	0	0	0	0	0.000557244	0	0	0	0	0.0018657	0	0.00552783	0
Gm28387	0	0	0	0	0	0	0	0	0	0	0	0	0	0	0	0	0	0	0	0	0	0	0	0	0	0	0	0	0	0	0	0	0	0	0	0	0	0	0	0	0	0	0	0	0	0	0	0	0
Pax3	0	0	0	0	0	0	0	0	0	0.000284925	0	0	0	0	0	0	0	0	0	0	0	0	0	0	0	0	0	0.00062324	0	0	0	0	0	0	0	0	0	0	0	0	0	0	0	0	0	0	0	0	0
Sgpp2	0.000462487	0.00185354	0.00528345	0.00335828	0.00753182	0.0626312	0.0763261	0.172962	0.239978	0.176758	0.0137618	0.0258929	0.0506802	0.0709123	0.041686	0.0473869	0.141866	0.172634	0.221774	0.198364	0	0	0.00453749	0	0.00764461	0.026545	0.038154	0.106618	0.150206	0.0956308	0.0168759	0.127619	0.173023	0.160958	0.311552	0.00215454	0	0.0177226	0	0	0.00701735	0	0.00723329	0.00269447	0.00117578	0.000407548	0.00165192	0.00645296	0
Gm28410	0	0.00178736	0.00285947	0	0	0.0539739	0.0474042	0.0435494	0.0734245	0.0770622	0	0.0046575	0.00903344	0	0.00149625	0.0243754	0.00499616	0.00945406	0.00691192	0.00982195	0	0.00283362	0	0	0	0.00528737	0.0243728	0.0136727	0.018597	0.0266221	0	0.0105218	0.00684853	0	0.0406059	0	0	0	0	0.000947991	0	0	0	0	0.00209026	0	0	0	0.00211085
Farsb	0.199599	0.220665	0.210308	0.23453	0.272359	0.315667	0.400592	0.398272	0.297428	0.32439	0.291967	0.295831	0.309086	0.236556	0.295897	0.389924	0.31624	0.301371	0.239499	0.308637	0.220465	0.283789	0.234075	0.185985	0.263822	0.38468	0.465434	0.490565	0.402715	0.427203	0.249108	0.20492	0.181536	0.0957965	0.209106	0.247499	0.34017	0.337581	0.185761	0.331082	0.287201	0.335539	0.306767	0.309082	0.24775	0.227115	0.259731	0.25573	0.216203
BC035947	0	0	0	0	0	0	0	0	0	0	0	0	0	0	0	0	0	0	0	0	0	0	0	0	0	0	0.00107591	0	0	0	0	0	0	0	0	0	0	0	0	0	0	0	0	0	0	0	0	0	0
Mogat1	0	0	0	0	0	0.00207406	0	0.00175915	0	0.00047288	0	0.000721472	0	0	0	0	0	0	0.00299127	0	0	0	0	0.00214543	0.00160233	0	0.00299222	0	0	0	0	0	0.00452509	0	0	0	0	0	0	0	0	0	0	0	0	0	0	0	0
5730419F03Rik	0	0	0	0	0	0	0	0.000494661	0.000801185	0	0	0	0	0	0.0013091	0	0	0	0	0.000870682	0	0	0	0	0	0	0	0	0	0	0	0.00939473	0	0	0	0	0	0	0	0	0	0	0	0	0	0	0	0	0
Gm29611	0	0	0	0	0	0	0	0	0	0	0	0	0	0	0	0	0	0	0	0	0	0	0	0	0	0	0	0	0	0	0	0	0	0	0	0	0	0	0	0	0	0	0	0	0	0	0	0	0
Acsl3	0.309619	0.27519	0.19625	0.187755	0.190236	0.628078	0.358945	0.209098	0.425408	0.410816	0.353056	0.311534	0.294277	0.229143	0.285718	0.428229	0.192776	0.175807	0.20611	0.272546	0.292018	0.183445	0.140893	0.233411	0.22057	0.429261	0.39573	0.280876	0.324659	0.304047	0.426226	0.404944	0.322194	0.392794	0.513848	0.326219	0.297664	0.21571	0.272936	0.147542	0.262725	0.212061	0.203233	0.163724	0.144595	0.327564	0.279421	0.151587	0.231866
Utp14b	0.227464	0.222333	0.194907	0.180806	0.0924585	0.805622	0.58615	0.334776	0.58473	0.408486	0.275891	0.296359	0.256218	0.266329	0.180129	0.276078	0.249191	0.177813	0.244323	0.16953	0.187842	0.143049	0.16954	0.29861	0.0835798	0.354156	0.40533	0.422369	0.520549	0.361027	0.383934	0.527972	0.323999	0.376189	0.27236	0.293131	0.31516	0.22279	0.29129	0.0796091	0.21245	0.189682	0.195977	0.19387	0.0688386	0.231188	0.192246	0.177189	0.194802
Gm29536	0	0	0	0	0	0	0	0	0.0010745	0	0	0	0	0	0	0	0	0.000563054	0.00111897	0	0	0	0	0	0	0	0	0	0	0	0	0	0.00345481	0	0	0	0	0	0	0	0	0	0	0	0	0	0	0	0
Kcne4	0.0940505	0.128816	0.16222	0.15053	0.141049	0.00233442	0	0.00152424	0.00130405	0.0021484	0	0.000767538	0.00531766	0	0.00260891	0	0	0.000629727	0.00168433	0.00468844	0.0374254	0.0453061	0.0934023	0.137285	0.0810106	0.00120757	0	0.00151945	0.00109947	0.00179634	0	0	0.00379154	0	0.0362718	0.00923651	0.00751824	0.00276687	0.0032114	0.00651061	0.0660014	0.0785036	0.161381	0.142137	0.136147	0.0343805	0.0489967	0.0962567	0.0707864
Gm29187	0	0	0	0.00278634	0	0	0	0	0	0	0	0	0	0	0	0	0	0	0	0	0	0.00693462	0	0	0	0	0	0	0	0	0	0	0	0	0	0	0	0	0	0	0	0	0	0.00165451	0	0	0	0	0
Scg2	0	0	0	0	0	0.0120239	0.00438172	0.00293616	0.00349126	0.00718581	0.00187674	0.00076914	0	0	0	0	0.00519932	0.00216042	0.000509342	0.00151734	0	0	0	0	0	0	0.005052	0.000805951	0.0124246	0.000601765	0	0	0.00604827	0	0	0	0	0	0	0	0	0	0	0	0	0	0	0	0
Ap1s3	0	0	0	0	0	0.00253261	0.000999888	0.00103225	0.00205324	0.00126291	0.00122086	0.000505138	0.00318353	0.00291967	0.00111342	0	0	0.00211795	0.0041475	0.00282778	0	0	0	0	0	0	0.001664	0.00168432	0.0051011	0.00359363	0	0	0	0	0	0	0	0	0	0	0.000785407	0	0	0	0	0	0	0	0
Wdfy1	0.126908	0.116531	0.106675	0.118732	0.0864836	0.0963842	0.0714252	0.0718342	0.093068	0.0799938	0.094335	0.0837012	0.109316	0.110843	0.109844	0.0600808	0.156183	0.0870358	0.120457	0.111358	0.106974	0.125294	0.149518	0.134831	0.123479	0.0582678	0.0811384	0.0697387	0.0760088	0.087935	0.165253	0.197035	0.16542	0.0834953	0.168264	0.0904738	0.121789	0.0822415	0.0818589	0.131842	0.0949662	0.096118	0.0662214	0.139319	0.120908	0.0927751	0.0826131	0.109015	0.0990303
Mrpl44	0.105406	0.0603907	0.073488	0.106507	0.18154	0.249951	0.185182	0.20577	0.194325	0.214483	0.271949	0.176576	0.24583	0.184157	0.270631	0.197218	0.111039	0.20732	0.204738	0.225144	0.0742255	0.107866	0.0696069	0.0531073	0.144021	0.218065	0.272856	0.244867	0.252288	0.30784	0.146749	0.0453925	0.11907	0.0739289	0.119441	0.0787038	0.06406	0.111852	0.0571983	0.191067	0.0663545	0.0584945	0.0950808	0.100341	0.15193	0.0569368	0.0485773	0.0971062	0.0613203
Serpine2	1.74108	1.47778	1.57746	1.00949	1.33366	11.9904	13.6495	10.9745	12.6355	13.6778	9.86193	7.67224	8.34501	7.28282	8.16786	5.10945	5.1332	4.82093	4.56451	4.60023	1.91307	1.615	1.38413	1.11708	1.60443	12.8589	12.3351	13.017	13.2062	12.5099	9.13698	10.1038	11.0911	4.65623	9.83411	2.33694	1.83744	1.83526	1.56276	1.85904	0.881208	0.665134	0.762266	0.628056	0.718869	2.79447	2.25591	2.19072	2.19993
9830004L10Rik	0	0	0	0	0	0	0	0	0	0	0	0	0	0	0	0	0	0	0	0.000893436	0	0	0	0	0	0	0	0	0	0	0	0	0	0	0	0	0	0	0	0	0	0	0	0	0	0	0	0	0
Fam124b	0	0	0	0	0	0	0	0	0	0	0.000189894	0	0	0	0	0	0	0	0	0.000332524	0.00662117	0	0	0	0	0	0	0.000947233	0	0	0.0182768	0	0	0	0	0	0	0	0	0	0.00115003	0	0	0	0	0	0	0	0
2310015K22Rik	0.00158125	0	0	0	0	0	0	0	0	0	0	0	0	0	0	0	0	0	0	0	0	0	0	0	0	0	0	0	0	0	0	0	0	0	0	0	0	0	0	0	0	0	0	0	0	0	0	0	0
Cul3	0.842377	0.833023	0.655991	0.811681	0.779319	1.03993	0.956633	0.924385	1.0126	1.03525	1.17984	1.06875	1.00622	1.00791	0.979215	1.26771	1.06904	0.975297	1.09586	1.24257	0.955531	0.766952	0.761707	0.851472	0.861646	1.05563	0.951443	0.859813	0.877898	0.906113	0.92446	0.757964	0.547331	0.327041	0.661369	1.00277	0.955471	0.736319	0.766794	0.83937	0.907606	0.89303	0.765838	0.913849	0.75221	0.955873	0.844196	0.771717	0.889335
Gm29125	0	0	0	0	0	0	0	0	0	0	0	0	0	0	0	0	0	0	0	0	0	0	0	0	0	0	0	0	0	0	0	0	0	0	0	0.00140304	0	0	0	0	0	0	0	0	0	0	0	0	0
1700016L21Rik	0	0	0	0	0	0	0	0	0	0.000620732	0	0	0	0	0	0	0	0	0	0	0	0	0	0	0	0	0	0	0	0	0	0	0	0	0	0	0	0	0	0	0	0	0	0	0	0	0	0	0
Gm45261	0	0	0	0	0	0	0	0	0	0	0	0	0	0	0	0	0	0	0	0	0	0	0	0	0	0	0	0	0	0	0	0	0	0	0	0	0	0	0	0	0	0	0	0	0	0	0	0	0
Dock10	0.00530453	0.0185969	0.007518	0.00505354	0.00439193	0.00818557	0.00166952	0.00162875	0	0.00110979	0.000569078	0	0	0	0	0.00828452	0	0.00201142	0.00537495	0.00280744	0.00924962	0.0294728	0.0433727	0.035231	0.0149169	0.00414475	0.000847397	0.00223824	0.0014262	0.0014654	0	0	0	0.0122331	0.00448559	0.0442244	0.0372137	0.0125612	0.0343726	0.0112033	0.00814776	0.00909554	0.0197779	0.00628038	0.00776191	0.0296943	0.0521865	0.0299321	0.0558085
Nyap2	0	0	0	0	0	0.00211526	0	0.00278247	0.000963498	0.000561735	0.000407659	0.000781889	0	0	0	0	0	0.000915573	0.00103286	0.00135225	0	0	0	0	0	0	0.00058689	0.000713124	0.00524367	0.0020445	0	0	0	0	0.00349366	0	0	0	0	0	0	0	0.00172041	0	0	0	0	0	0
Irs1	0.450141	0.377182	0.354643	0.380823	0.406372	0.210452	0.18948	0.167229	0.253613	0.323515	0.150767	0.115064	0.112572	0.116742	0.12928	0.201248	0.181712	0.201294	0.277933	0.29316	0.487288	0.345126	0.303655	0.351116	0.355725	0.0998645	0.0852999	0.0671803	0.130248	0.0927662	0.37449	0.3769	0.199697	0.454977	0.220063	0.381435	0.288208	0.28737	0.301802	0.281681	0.358978	0.286343	0.239106	0.356609	0.377453	0.359101	0.250871	0.333827	0.244972
Gm9747	0.00797906	0.0113029	0.0181365	0.00775656	0.0107845	0	0.00787311	0.00786099	0.00422324	0.00637011	0.000502041	0.0053183	0.00858172	0	0.00196452	0	0	0.00734992	0.00452024	0.00275283	0.00814729	0.0198943	0.00505154	0.0128136	0.00138099	0	0.0053555	0.000805223	0.00516417	0	0.00556371	0.0345617	0.0224682	0	0	0.00152509	0.0180303	0.00807575	0	0.00588105	0.00547894	0.00929486	0.00623459	0.01073	0.00302404	0.0054373	0.00979727	0.00554193	0
Rhbdd1	0.0683084	0.0279537	0.0338545	0.0702132	0.0666051	0.0355684	0.026486	0.0609403	0.0701181	0.0515556	0.0425719	0.0447977	0.0279935	0.0411194	0.0452233	0.018958	0.0610738	0.0591726	0.0637034	0.0682419	0.0440805	0.032155	0.0194887	0.030513	0.0501322	0.0353579	0.0333586	0.0379857	0.0543592	0.0441287	0.0538839	0.0345098	0.0587922	0.0488987	0.0251705	0.0431619	0.0417604	0.0422505	0.0278225	0.0375302	0.0330069	0.0301326	0.030898	0.0487513	0.0314601	0.0346766	0.0293982	0.0275122	0.0362566
Gm28940	0.0233204	0	0.000986819	0	0.00152724	0	0	0	0	0.00136668	0.000531412	0.000785064	0	0	0	0	0	0	0	0.00160903	0.0267514	0	0.00324947	0.00168002	0	0.000908148	0	0	0	0.000720325	0.00721623	0	0	0	0.047732	0.0112143	0	0.00445583	0	0.00273071	0.0307193	0	0.00170274	0.00713715	0	0.00840557	0	0	0.00436757
Col4a4	4.30551	4.15753	3.50217	2.93095	1.93614	0.199874	0.141152	0.0970877	0.08609	0.0736753	0.181278	0.296742	0.316877	0.270818	0.141653	0.490629	0.46677	0.295956	0.335389	0.267341	3.47683	2.18387	1.74857	1.48219	0.853002	0.11727	0.130103	0.106606	0.0943036	0.0932859	0.318855	0.551944	0.404167	0.187209	0.259476	5.39518	4.0076	3.84799	1.94308	1.68881	4.77292	1.51144	0.967494	1.52848	0.836981	2.86323	1.96573	1.76781	1.0922
Col4a3	0.690745	0.670309	0.480893	0.40419	0.272966	0.0367348	0.0363136	0.0258907	0.0165868	0.0180152	0.0797082	0.132382	0.11006	0.0863892	0.0735544	0.202873	0.170279	0.0864608	0.090575	0.0705953	0.409364	0.183582	0.213939	0.150001	0.0875985	0.0613027	0.0418124	0.0236644	0.0388404	0.0318139	0.246006	0.210478	0.121227	0.101605	0.0789623	0.82633	0.538733	0.445642	0.360962	0.286544	0.608588	0.114401	0.0732422	0.227104	0.0838125	0.31117	0.210078	0.172415	0.160215
Mff	0.91413	0.762083	0.791571	0.683063	0.791468	0.947495	0.895449	1.1085	0.920944	1.08012	1.02135	1.09796	0.973818	0.849923	0.858538	0.793256	0.942375	0.993569	0.882378	1.05671	0.865425	0.769221	0.756309	0.700906	0.944822	0.885037	0.918581	0.926137	0.786288	0.826423	0.641418	0.521701	0.469895	0.423388	0.41072	1.05184	0.936693	0.87057	0.744156	0.88804	0.825604	0.782772	0.842591	0.711281	0.810196	0.84869	0.795671	0.75248	0.721716
Tm4sf20	0	0.00111052	0	0	0	0.000935765	0	0	0	0	0.000423925	0	0	0	0	0	0	0	0	0.000932122	0	0	0.00207462	0	0	0	0.000922989	0.000866141	0.00179357	0	0.00776586	0	0.00425748	0	0	0	0	0	0	0	0	0	0.00192491	0.00220728	0.000992899	0	0	0	0
Gm47791	0	0	0	0	0	0	0	0	0	0	0	0	0	0	0	0	0	0	0	0	0	0	0	0	0	0	0	0	0	0	0	0	0	0	0	0	0	0	0	0	0	0	0	0	0	0	0	0	0
Gm28942	0	0	0	0.00249973	0	0	0	0	0	0	0	0	0	0	0	0	0	0	0	0	0	0	0	0	0	0	0	0	0	0	0	0	0	0	0	0	0	0	0	0	0	0	0	0	0	0	0	0	0
Agfg1	0.51597	0.441212	0.445131	0.40243	0.439836	0.447596	0.401893	0.332736	0.37362	0.372049	0.45814	0.48708	0.436944	0.398166	0.366062	0.683708	0.333847	0.416723	0.442919	0.408869	0.480915	0.501801	0.397112	0.434023	0.455598	0.432695	0.432674	0.336115	0.352312	0.34208	0.535598	0.55991	0.445047	0.256719	0.282654	0.69314	0.622106	0.597463	0.487206	0.430795	0.475068	0.485529	0.442608	0.407429	0.405993	0.553093	0.533614	0.456412	0.452682
A030005L19Rik	0.00542403	0.00205264	0.00428252	0.00461649	0.00102362	0.00177869	0	0.00028939	0.00407444	0.000938853	0.0010872	0.00149196	0	0.00560936	0	0.0214212	0	0.0025191	0.00674222	0.000946074	0.00194614	0	0	0.0030899	0.00555198	0	0.000745999	0	0	0.00239688	0.0159045	0.0150082	0.00655229	0	0.014612	0.00419264	0.0107857	0	0.0056396	0	0.00245018	0.00271869	0	0	0.00279328	0.00641558	0.00322792	0	0
A030014E15Rik	0	0	0	0	0	0	0	0.000558203	0.000614125	0.00115634	0.000654463	0	0	0	0	0	0	0.000958047	0.00164341	0.000593319	0	0	0	0	0	0	0	0	0.000823797	0	0	0	0	0	0	0	0.00139456	0.00436053	0	0	0	0	0.00686603	0	0	0.00347925	0	0	0
Gm6217	0	0	0	0	0	0	0	0	0	0	0	0	0	0	0	0	0	0	0	0	0	0	0	0	0	0	0	0	0	0	0	0	0	0	0	0	0	0	0	0	0	0	0	0	0	0	0	0	0
A030003K21Rik	0	0	0	0	0	0	0	0	0	0	0	0	0	0	0	0	0	0	0	0	0	0	0	0	0	0	0	0	0	0	0	0	0	0	0	0	0	0	0	0	0	0	0	0	0	0	0	0	0
Gm7544	0	0	0	0	0	0	0	0	0	0	0	0	0	0	0	0	0	0	0	0	0	0	0	0	0	0	0	0	0	0	0	0	0	0	0	0	0	0	0	0	0	0	0	0	0	0	0	0	0
Gm47955	0	0	0	0	0	0	0	0	0	0	0	0	0	0	0	0	0	0	0	0	0	0	0	0	0	0	0	0	0	0	0	0	0	0	0	0	0	0	0	0	0	0	0	0	0	0	0	0	0
Gm47959	0	0	0	0	0	0	0	0	0	0	0	0	0	0	0	0	0	0	0	0	0	0	0	0	0	0	0	0	0	0	0	0	0	0	0	0	0	0	0	0	0	0	0	0	0	0	0	0	0
Slc19a3	0.00947038	0.0011241	0	0.00208787	0.000995048	0.0417848	0.00481786	0.00464013	0.0102669	0.0100624	0.00798493	0.00444444	0.0187137	0.00457976	0.0148856	0.0275493	0	0.00472955	0.00524823	0.00935474	0.00181087	0.00880454	0	0.00826852	0.00556532	0.0106655	0.00589389	0.00497555	0.00580878	0.0120115	0.00961482	0.00698336	0	0.0217277	0.00698335	0.00130369	0.0032845	0	0.0109067	0.0025474	0.000704956	0	0	0.00364364	0.000869547	0.00161165	0	0.00359951	0
Krtap28-10	0	0	0	0	0	0	0	0	0	0	0	0	0	0	0	0	0	0	0	0	0	0	0	0	0	0	0	0	0	0	0	0	0	0	0	0	0	0	0	0	0	0	0	0	0	0	0	0	0
Gm47969	0	0	0	0	0	0	0	0	0	0	0	0	0	0	0	0	0	0	0	0	0	0	0	0	0	0	0	0	0	0	0	0	0	0	0	0	0	0	0	0	0	0	0	0	0	0	0	0	0
A030005K14Rik	0	0	0	0	0	0	0	0	0	0	0	0	0	0	0	0	0	0	0	0	0	0	0	0	0	0	0	0	0	0	0	0	0	0	0	0	0	0	0	0	0	0	0	0	0	0	0	0	0
Krtap28-13	0	0	0.00301466	0.000549533	0	0	0	0	0	0.000393437	0.000511011	0	0	0	0	0	0.00436331	0	0.000855518	0	0	0	0	0	0	0	0	0	0	0	0	0	0	0	0	0.00444977	0	0	0	0	0	0	0	0	0	0	0	0	0
Ccl20	0	0	0	0	0	0	0	0	0	0	0.000754941	0	0	0	0	0	0	0	0	0	0	0	0	0	0	0	0	0	0	0	0	0	0	0	0	0	0	0	0	0	0	0	0	0	0	0	0	0	0
Daw1	0	0.000548631	0	0	0	0	0.0015071	0	0.000740324	0.0010835	0.00250478	0	0.0014806	0	0	0	0	0.00173965	0.00124542	0.00167132	0	0	0	0.00112979	0	0.00122429	0.00157846	0.00262584	0	0.00234188	0	0.02962	0	0	0	0	0	0	0	0	0.000943781	0	0	0	0	0	0	0	0
Sphkap	0.00229613	0	0	0	0	0	0	0.000653012	0	0	0.000629807	0	0	0	0	0	0	0	0.00166778	0	0	0	0	0	0	0	0.00136335	0	0	0	0	0	0	0	0	0	0	0	0	0	0	0	0	0.00473492	0	0	0	0	0.00390578
4933436I20Rik	0	0	0	0	0	0	0	0	0	0	0	0	0	0	0	0	0	0	0	0	0	0	0	0	0.00146078	0	0	0	0	0	0	0	0	0	0	0	0	0	0	0	0	0	0	0	0.000794624	0	0	0	0
Pid1	1.29463	1.21313	1.23584	1.12416	1.1787	0.284332	0.643082	1.86681	0.89062	0.888296	0.0386446	0.0234146	0.0926836	0.0599827	0.0392882	0.365404	0.77016	1.33147	0.743897	0.852332	2.45056	1.9255	1.70125	1.89784	1.81062	0.0797318	0.177847	0.411832	0.34691	0.240255	0.398759	0.675729	2.68941	1.04044	0.902073	1.46179	1.36341	1.48057	2.2376	1.77093	1.1271	0.415348	0.674828	0.780626	0.698169	1.60243	1.19776	1.63228	1.38752
Dner	0.0438293	0.0119185	0.00828383	0.00319915	0.0025587	0.00357461	0.00594764	0.00470796	0.0140595	0.00295467	0.00477799	0	0.0030423	0.00235716	0	0.0127116	0	0.00503906	0.005214	0.00587164	0.13239	0.0248305	0.0173599	0.00969689	0	0.00514063	0.00483955	0	0.0010535	0.000534781	0	0	0	0	0	0.0704836	0.0143617	0.0132657	0.0163554	0.00709715	0.113805	0.0145276	0.0196156	0.0319408	0.00929201	0.103345	0.0317347	0.0442648	0.0121851
Trip12	0.625986	0.457993	0.441671	0.552516	0.474225	0.746434	0.635714	0.607633	0.781531	0.912598	0.991208	0.911433	0.787846	0.955151	0.814385	0.931806	0.63124	0.721957	0.874418	0.864731	0.639653	0.429469	0.635618	0.565384	0.530698	0.797869	0.574278	0.582696	0.629447	0.63389	1.64016	1.23689	0.920281	0.960433	0.911306	0.682003	0.528756	0.659853	0.664977	0.515679	0.600177	0.537175	0.574123	0.682555	0.596922	0.618186	0.501899	0.562917	0.689328
Fbxo36	0.0394585	0.0118538	0.0376963	0.0402473	0.0419139	0.108676	0.101557	0.163521	0.201579	0.18807	0.120674	0.0949516	0.116904	0.12798	0.163937	0.0714151	0.0866909	0.237085	0.229083	0.211214	0.0387835	0.0272032	0.0432763	0.0416738	0.0452587	0.115706	0.112475	0.185743	0.147612	0.166298	0.0198037	0.0354026	0.103079	0.0326117	0.0470392	0.0398516	0.0191793	0.0379727	0.0230173	0.0449168	0.0588117	0.044125	0.0663544	0.0558504	0.0780431	0.0410921	0.0156486	0.0398157	0.0587292
Slc16a14	0	0	0	0	0	0.00187416	0	0.000545632	0	0	0.000627417	0.000868881	0	0	0	0	0	0	0	0	0	0	0	0	0	0	0	0.00246932	0	0	0	0	0	0	0	0	0	0	0	0	0	0	0	0	0	0	0	0	0
C130026I21Rik	0.000941189	0	0	0	0.000939513	0	0	0	0	0	0	0.000949855	0	0	0	0	0	0	0	0.00234059	0	0	0	0	0.00107865	0	0	0	0	0	0	0.00700205	0	0	0	0	0	0.00451448	0	0.00317565	0	0	0	0	0	0.00222831	0	0	0
A530032D15Rik	0	0	0	0	0.00189501	0	0	0.000865151	0	0	0	0	0	0	0	0	0	0.00052566	0	0	0	0	0	0	0	0	0.000824979	0	0.00113043	0.00156325	0	0	0.00356708	0	0	0	0	0	0	0	0	0	0	0	0	0	0.00219914	0.00325988	0
Gm10553	0	0	0	0	0	0	0	0	0	0	0	0	0	0	0	0	0	0	0	0	0	0	0	0	0	0	0	0	0	0	0	0	0	0	0	0	0	0	0	0	0	0	0	0	0	0	0	0	0
A530040E14Rik	0.00145613	0	0	0.00416212	0	0	0	0	0	0.000603173	0	0	0	0.00116263	0	0	0	0	0	0	0	0.0296158	0	0	0	0	0	0	0	0	0	0.0126194	0	0	0	0.00222554	0	0	0	0.00229329	0	0	0	0	0	0	0	0	0
Gm16028	0	0	0	0	0	0	0	0	0	0	0	0	0	0	0	0	0	0	0	0	0	0	0	0	0	0	0	0	0	0	0	0	0	0	0	0	0	0	0	0	0	0	0	0	0	0	0	0	0
Gm16025	0	0	0	0	0	0	0	0	0	0	0	0	0	0	0	0	0	0	0	0	0	0	0	0	0	0	0	0	0	0	0	0	0	0	0	0	0	0	0	0	0	0	0	0	0	0	0	0	0
Gm16092	0	0	0	0	0	0	0	0	0	0	0	0	0	0	0	0	0	0	0	0	0	0	0	0	0	0	0	0	0	0	0	0	0	0	0	0	0	0	0	0	0	0	0	0	0	0	0	0	0
G530012D18Rik	0	0	0	0.00183111	0	0	0	0	0	0	0	0	0	0	0	0	0	0	0	0	0	0	0	0	0	0	0	0	0	0	0	0	0	0	0	0	0	0	0	0.00330563	0	0	0	0.00158579	0	0	0	0	0
Sp110	0.0202795	0.0472304	0.0347939	0.0672502	0.0475274	0	0	0.00982775	0.00372299	0.00403493	0	0	0.00782355	0	0	0	0.0203247	0.00986467	0.00534577	0.00591263	0.00260095	0.0190674	0.0570045	0.0684608	0.0829231	0	0	0.00906173	0.00310288	0.00268675	0	0	0.00434083	0	0.030212	0.00762873	0.0112829	0.0907402	0.0548898	0.0464725	0.00146602	0.00225331	0.020344	0.0110742	0.0155104	0.00421729	0.00996153	0.0423127	0.044958
Gm16094	0	0	0	0	0	0	0	0	0	0	0	0	0	0	0	0	0	0	0	0	0	0	0	0	0	0	0	0	0	0	0	0	0	0	0	0	0	0	0	0	0	0	0	0	0	0	0	0	0
Sp140	0.00592524	0.0190748	0.00970993	0.0148446	0.0110258	0	0.0287281	0.0583414	0.0282573	0.0209623	0.00115237	0.0111873	0.00710327	0.0142431	0.00385112	0	0.0228847	0.0576543	0.03569	0.0274706	0.00351173	0.0208337	0.0609423	0.0583221	0.066656	0.00330711	0.00942255	0.0284841	0.0247506	0.0150609	0.0164721	0.00786897	0.0533166	0.018081	0.0217171	0.00585227	0.0109998	0.00484616	0.0195117	0.00899748	0.00482746	0.0132797	0.0336318	0.0193353	0.00760452	0.00846256	0.0159317	0.0336815	0.0577144
Gm10552	0	0	0	0	0	0	0	0	0	0	0	0	0	0	0	0	0	0	0	0	0	0	0	0	0	0	0	0	0	0	0	0	0	0	0	0	0	0	0	0	0	0	0	0	0	0	0	0	0
Gm17017	0	0	0	0	0	0	0	0	0	0	0	0	0	0	0	0	0	0	0	0	0	0	0	0	0	0	0	0	0.00123412	0	0	0	0	0	0	0	0	0	0	0.00192566	0	0	0.00174889	0	0	0	0	0	0
Sp100	0.00211207	0.0227477	0.075157	0.0883268	0.102312	0	0.00154594	0.00589444	0.0025409	0.00544775	0	0	0.0050577	0	0	0	0	0.00602608	0.007271	0.0112671	0.0149455	0.0236823	0.195677	0.330151	0.231701	0.000883045	0	0.00169582	0.000809627	0.00424912	0	0.00656021	0.0127641	0	0.00527008	0.0210109	0.0259208	0.133622	0.107204	0.182015	0.00832536	0.022633	0.114078	0.139324	0.118282	0.00844423	0.00626879	0.124592	0.151965
A630001G21Rik	0.00442511	0	0.0038725	0.00580712	0.0035836	0	0.00310116	0.00364399	0.00502478	0.00711499	0	0	0	0.00101778	0	0	0.00585908	0.00109627	0.00963533	0.00569756	0	0	0.0119842	0.00338579	0.00548521	0	0.00129432	0.00176709	0	0.00192372	0	0.00769916	0.00700346	0	0.0172865	0.00610223	0	0.00759232	0.0134867	0	0.00527316	0.00404036	0.00109978	0	0.00149044	0	0	0.00799777	0
9930111H07Rik	0	0	0	0	0	0	0	0	0.000779015	0	0	0	0	0	0	0	0	0	0.000856986	0	0	0	0	0	0	0	0	0	0	0	0	0	0	0	0	0	0	0	0	0	0	0	0	0	0	0.001501	0	0	0
Cab39	0.634088	0.379594	0.372938	0.500104	0.605198	0.38121	0.314354	0.329064	0.441472	0.46272	0.416652	0.32893	0.360256	0.440264	0.467353	0.608695	0.475377	0.472162	0.563322	0.690542	0.42721	0.285625	0.326533	0.385263	0.416908	0.354549	0.257784	0.251584	0.322942	0.409604	0.459595	0.411223	0.337841	0.476691	0.37666	0.456264	0.347864	0.261301	0.344234	0.392028	0.402388	0.280324	0.268773	0.326093	0.42401	0.5003	0.324843	0.246319	0.331241
Itm2c	1.33336	0.956946	1.04607	1.30098	1.56856	1.32033	0.740074	0.721616	1.00842	0.961471	2.01797	1.13059	1.20926	1.48315	1.51998	2.23429	1.16647	0.803947	1.24031	1.22312	1.97256	1.38306	1.61692	1.91703	2.44218	1.33335	0.771319	0.722203	0.840862	0.774541	1.22057	0.874272	0.748279	0.472948	1.06719	2.69415	1.79633	1.94486	2.0009	2.91944	1.90891	1.42382	1.5201	1.63588	2.17454	1.99385	1.4152	1.64848	1.84881
4933407L21Rik	0.00241076	0.00145899	0	0.0021203	0.000919951	0.00173015	0	0	0	0	0.0016674	0.000638051	0.0054546	0	0	0	0	0	0	0.000770551	0.00211395	0	0	0	0.00178905	0.000941869	0.00111204	0	0	0.000664406	0.00393513	0	0	0	0	0	0	0	0	0	0.00162481	0.00210358	0.00221054	0.0089446	0.00369651	0.00151144	0	0	0
Gm28884	0	0	0	0	0	0	0	0	0	0	0.000556743	0.00101668	0	0	0	0	0	0	0	0	0	0	0	0	0	0	0.000530988	0	0.000812692	0.000906531	0	0	0.00469169	0	0	0	0	0	0	0	0	0	0	0	0.00167098	0.000869704	0	0	0
Gpr55	0	0.00145899	0	0	0	0	0	0.000430863	0	0.000665425	0.000568253	0.00176822	0.00612055	0.00658893	0.00408575	0	0	0.000537999	0	0	0.0013728	0.00531914	0	0	0	0	0.00152375	0.00162134	0	0	0	0	0.0103833	0	0	0.00558963	0	0	0.00407906	0	0.00103004	0	0	0.00227942	0.00130841	0	0.00205798	0.00187516	0
Gm28100	0	0	0	0	0	0	0	0	0	0	0	0	0	0	0	0	0	0	0	0	0	0	0	0	0	0	0	0	0	0	0	0	0	0	0	0	0	0	0	0	0	0	0	0	0	0	0	0	0
Spata3	0	0	0	0	0	0	0	0	0	0	0	0	0	0	0	0	0	0	0	0	0	0	0	0	0	0	0	0	0	0	0	0	0	0	0	0	0	0	0	0	0	0	0	0	0	0	0	0	0
2810459M11Rik	0	0	0	0	0	0	0	0	0	0	0.00278436	0.00182584	0.00209882	0.00284996	0	0	0	0.000584701	0	0	0.00174998	0	0	0	0	0.0023719	0.00204864	0.000644703	0	0.000639858	0	0	0	0	0	0	0	0	0	0	0.00218759	0	0	0	0	0	0	0	0
Psmd1	1.02311	0.8683	0.829382	0.785209	0.823594	1.1792	1.33778	1.02376	1.08179	0.993565	1.13479	1.08714	1.04611	0.99356	0.957196	1.19027	1.10773	1.1339	1.07559	1.07535	0.971985	0.807695	0.712432	0.633106	0.758988	1.35489	1.66983	1.79121	1.53004	1.48879	0.678684	0.995824	0.670841	0.328124	0.458739	0.947761	0.830898	0.904723	0.815496	0.80287	0.986813	1.01264	0.908216	0.871072	0.875377	0.892914	1.00786	0.895468	0.777845
Htr2b	0.0159596	0.0111321	0.00512166	0.00750568	0.00440644	0.00710185	0.0110836	0.00172135	0.00178455	0.000369563	0.00185867	0.00443915	0.00256081	0.00890368	0.00170106	0	0.00629786	0.00100801	0.00147016	0	0.0273514	0	0.00262741	0.00909091	0.00707539	0.00442808	0.00210547	0.00230346	0.00100054	0.00106924	0.00587531	0.0562108	0.00446855	0.0218662	0.0250825	0.0123934	0.00679846	0.0104343	0.0124865	0.00603423	0.007554	0.0109671	0.0116481	0.0161348	0.00291428	0.0165341	0.00714681	0.0195685	0.00211165
Gm21972	0	0	0.00308292	0	0	0	0	0	0	0.00189257	0.000629994	0.000806984	0	0	0.00133828	0	0	0	0.000955068	0	0	0	0	0	0	0.00346135	0	0.000382039	0.0031889	0.00124495	0	0	0	0	0	0	0	0.00640055	0	0	0	0	0	0	0	0	0	0	0
Armc9	0.093923	0.0661416	0.0783728	0.0974333	0.0749542	0.148337	0.138882	0.108731	0.125145	0.137133	0.157314	0.160133	0.157638	0.141657	0.168775	0.0378032	0.0298248	0.0907158	0.131134	0.0986292	0.112975	0.0840053	0.050467	0.0932744	0.0952524	0.187497	0.182389	0.191898	0.193479	0.217989	0.397526	0.327468	0.22891	0.144375	0.254802	0.10361	0.154168	0.117061	0.104524	0.0710404	0.0821969	0.0932653	0.103351	0.123239	0.0906124	0.0690082	0.0860325	0.0890952	0.0593012
Gm16341	0	0	0	0	0	0	0	0	0	0	0	0	0	0	0	0	0	0	0	0	0	0	0	0	0	0	0	0	0	0	0	0	0	0	0	0	0	0	0	0	0	0	0	0	0	0	0	0	0
B3gnt7	0.00492193	0.00340411	0.00338304	0	0.00111498	0.0012562	0.005337	0.00176339	0.00508303	0.00716633	0.0055469	0.00831921	0.0132178	0.00769487	0.0120827	0	0	0.00306205	0.00802859	0.00820775	0	0.00820586	0.0035797	0	0	0.00584255	0.002353	0.0105275	0.00467325	0.0131034	0	0	0.0123145	0	0.017858	0.00968926	0.00979955	0	0	0.00113344	0.0102253	0	0	0.00160523	0.00670344	0.00591908	0	0.00174719	0
Gm28626	0	0	0	0	0	0	0	0	0.00153492	0.000726006	0.000698759	0	0.00169323	0	0	0	0	0	0	0.000534712	0	0	0	0	0	0	0	0	0	0	0	0	0	0	0	0	0	0	0	0	0	0	0	0	0	0	0	0	0
Ncl	6.42389	7.81247	5.33941	5.41585	4.55274	8.55583	11.1974	9.08326	8.59176	7.30655	11.1754	10.9693	9.16947	10.5731	9.58186	7.13157	9.02042	7.11028	6.99847	7.05024	6.61918	6.61727	5.28944	5.48998	4.82684	14.6133	15.5427	12.89	13.9892	12.4241	5.45843	8.96352	6.34052	6.33728	5.36749	7.44612	8.84259	6.15066	5.72134	5.35737	8.99481	10.1462	8.20432	8.93631	7.13829	7.79439	8.78682	5.80539	6.09866
Nmur1	0	0	0	0.000647508	0	0	0	0	0	0	0	0	0	0	0	0	0	0	0	0	0	0	0	0	0	0	0	0	0	0	0	0	0	0	0	0	0	0	0	0	0	0	0	0	0	0	0	0	0
Tex44	0	0	0	0	0	0	0	0	0	0	0	0	0	0	0	0	0	0	0	0	0	0	0	0	0	0	0	0	0	0	0	0	0	0	0	0	0	0	0	0	0	0	0	0	0	0	0	0	0
Ptma	30.1253	33.0929	25.6494	30.4564	25.9889	28.2533	29.4133	22.5227	28.9629	23.2258	32.5235	26.0979	22.7489	30.8761	26.9172	32.3332	23.5634	24.1041	32.2177	29.7817	28.2285	30.0612	21.5408	26.1014	25.2852	40.0398	35.3922	32.4203	40.2007	33.3699	13.5028	13.27	11.75	10.9647	14.863	40.3454	42.195	28.2664	37.6933	29.2824	31.0168	31.6553	25.4452	28.0631	25.7983	33.9183	37.0781	25.2795	31.3989
Pde6d	0.311877	0.180239	0.219329	0.301093	0.393645	0.363228	0.160413	0.140959	0.302912	0.391404	0.370942	0.199221	0.218485	0.250902	0.342798	0.49616	0.288361	0.174423	0.345995	0.409012	0.297153	0.234142	0.193729	0.326319	0.418629	0.402819	0.207054	0.192343	0.297402	0.330719	0.188176	0.0812307	0.0961417	0.0330188	0.228908	0.309936	0.155452	0.239474	0.292787	0.346859	0.271369	0.142229	0.172123	0.215802	0.304166	0.273017	0.137252	0.120736	0.236342
Cops7b	0.116677	0.118991	0.0918574	0.105514	0.078829	0.10088	0.10235	0.0637902	0.0888975	0.113674	0.13593	0.097068	0.145186	0.121834	0.116017	0.137207	0.0782975	0.0813834	0.113495	0.131277	0.161709	0.0847413	0.114932	0.0980999	0.0939216	0.134562	0.0987971	0.0772707	0.098854	0.129442	0.19979	0.10949	0.126508	0.182634	0.124068	0.138901	0.117171	0.12895	0.110076	0.103642	0.113422	0.0739406	0.0814925	0.126088	0.111872	0.0822546	0.080084	0.094824	0.0520921
Nppc	0.0172548	0.00460896	0.0220855	0.0215039	0.024656	1.06062	0.703312	0.450426	1.73103	3.68062	0.10537	0.0711419	0.161222	0.12463	0.142154	0.350616	0.112717	0.0608247	0.193741	0.492881	0.0213396	0.0273693	0.0204969	0.0093691	0.0360845	0.194934	0.261948	0.349296	0.667296	1.26309	0.108194	0.178166	0.142131	0.22609	0.952283	0.0385687	0.0294429	0.0144639	0.0491994	0.028502	0.0109445	0.00811193	0.0116263	0.0419357	0.0192519	0.0257774	0.0309929	0.0088067	0.0174155
Dis3l2	0.123839	0.100999	0.086092	0.0995233	0.0858353	0.29078	0.360357	0.272071	0.304782	0.29527	0.270069	0.224646	0.298593	0.231341	0.234978	0.308104	0.229393	0.236005	0.276866	0.249408	0.143122	0.207809	0.139117	0.0984339	0.112647	0.263246	0.272456	0.316686	0.260249	0.261686	0.311275	0.486327	0.410726	0.458065	0.289925	0.140664	0.129835	0.101939	0.123424	0.117845	0.170934	0.0971355	0.128798	0.118999	0.14314	0.126003	0.115606	0.0916252	0.0850661
Gm28375	0	0	0	0	0	0	0.00157911	0.000571699	0	0	0	0	0.00214756	0	0	0	0	0	0.000909659	0	0	0.00258881	0	0.00506004	0	0	0	0	0	0.000612596	0	0.00604024	0	0	0	0	0	0	0	0	0	0	0	0	0	0	0	0	0
Gm29371	0	0.000840838	0.00103543	0	0	0	0.00217276	0	0	0	0	0	0	0	0	0	0	0	0.00145288	0	0	0.00411223	0.0037459	0.00256784	0.00080468	0	0.000693654	0	0.00135074	0	0	0	0.00274826	0	0	0	0	0.00301495	0	0.00109666	0	0	0	0.00276448	0	0	0	0.00436287	0
Alppl2	0	0	0	0	0	0	0	0.000638451	0	0	0	0	0	0	0	0	0	0	0	0	0	0	0	0	0	0	0	0.00178933	0	0.0012285	0	0	0	0	0	0	0.000813551	0	0	0	0	0	0	0	0	0	0	0	0
Alpi	0	0	0	0	0	0	0	0	0	0	0	0	0	0	0	0	0	0.000544734	0	0	0	0	0	0	0	0	0	0	0	0	0	0	0	0	0	0	0	0	0	0	0	0	0	0	0	0	0	0	0
Akp3	0	0	0	0	0	0	0	0	0	0	0	0	0	0	0	0	0	0	0	0	0	0	0	0	0	0	0	0	0	0	0	0	0	0	0	0	0	0	0	0	0	0	0	0	0	0	0	0	0
Gm29374	0	0	0	0	0	0	0	0.000508034	0	0	0	0	0	0	0	0	0	0	0	0	0	0	0	0	0	0	0	0	0	0	0	0	0	0	0	0	0	0	0	0	0	0	0	0	0	0	0	0	0
Ecel1	0	0	0	0	0	0.001624	0	0	0.00087182	0	0	0.00228717	0.00212537	0	0.00117877	0	0.00740241	0.00309567	0.00234267	0	0	0	0	0	0	0.000822806	0.000929307	0.000571757	0.000528839	0.00154167	0	0.0149939	0	0	0	0	0	0.00518487	0	0.00397577	0.000709547	0.000894158	0.00378284	0	0.000934412	0	0	0	0
Prss56	0	0	0	0	0	0	0	0.000956904	0	0.00220622	0.0037853	0.00083944	0.00306432	0.0103604	0.00812766	0	0	0.00105617	0.000946536	0.001489	0	0	0	0	0.00187053	0.00235747	0.00424994	0.00372763	0	0.00103365	0.00617097	0	0	0	0	0	0	0	0	0	0	0	0	0	0	0	0	0	0
Chrnd	0	0	0	0	0	0	0	0	0	0	0	0	0	0	0	0	0	0	0	0	0	0	0	0	0	0	0	0.000590942	0	0	0	0	0	0	0	0	0	0	0	0	0	0	0	0	0	0	0	0	0
Chrng	0	0	0	0	0	0	0	0	0	0	0	0.000850458	0	0	0	0	0	0.000725584	0	0	0	0	0	0	0	0	0	0	0	0	0	0	0.00229676	0	0	0	0.00267523	0	0	0	0	0	0.00193041	0.00142875	0	0	0	0	0
Eif4e2	0.750242	0.762194	0.782962	0.580365	0.651182	1.10961	1.45243	1.37606	1.23699	1.17792	1.07632	1.35127	1.32706	1.10092	1.03755	1.15473	1.20924	1.30683	1.04909	1.12236	0.749023	0.844708	0.741771	0.764237	0.733742	1.14517	1.44702	1.47203	1.33458	1.25158	0.455689	1.00542	0.85341	0.400419	0.631657	0.721493	0.778703	0.707658	0.460923	0.710466	0.93406	1.15809	1.12782	1.10393	1.09774	0.751829	0.936164	0.935156	0.804159
Efhd1	0.00165642	0.00969121	0.00128364	0.00155406	0.0037662	0.0301879	0.00491302	0.00113874	0.00279559	0.000962835	0.00737742	0.00260714	0	0.00333472	0.00470109	0.0151707	0.0477859	0.000885097	0.0113476	0.00447808	0.00211395	0	0	0.00467898	0.00493294	0.0045764	0.00159417	0.00257654	0.0036368	0.00439572	0.00657566	0	0	0	0	0.00366545	0	0	0.0133613	0.00250129	0.00256601	0.00880515	0.00469116	0.00375346	0.00123232	0.00248205	0.00400487	0.0103177	0.0067815
Efhd1os	0	0	0	0	0	0	0	0	0	0	0	0	0	0	0	0	0	0	0	0	0	0	0	0	0	0	0	0	0	0	0	0	0	0	0	0	0	0	0	0	0	0	0	0	0	0	0	0	0
Gigyf2	0.570776	0.574242	0.607255	0.529595	0.544053	0.674391	0.635243	0.495098	0.603283	0.668986	0.791513	0.788965	0.692939	0.75566	0.864223	0.623434	0.47715	0.54089	0.590093	0.658192	0.681999	0.68896	0.695738	0.62693	0.631213	0.659298	0.606665	0.519579	0.502445	0.662496	0.848975	0.71036	0.570915	0.800656	0.732392	0.600229	0.65519	0.693799	0.664712	0.68395	0.703117	0.614353	0.792085	0.650641	0.680878	0.617913	0.521822	0.506492	0.532281
Kcnj13	0	0.00869869	0.0038883	0.0102353	0.00269464	0.00387487	0.00984813	0.0071465	0.00298233	0.00420731	0.00246734	0.0141485	0.00721575	0.0103993	0.00453547	0.0139824	0	0.00717078	0.002158	0.0090366	0.00367022	0.0210868	0.011778	0.0103687	0.0169862	0.00821487	0.00529466	0.00477428	0.00743861	0.00804158	0.0046369	0.049825	0.0390354	0.0279947	0.0472741	0	0.00810359	0.0254301	0.034982	0.0146476	0.00104553	0.00220705	0.00622154	0.00683686	0.00429321	0	0.00505188	0.00256472	0.00356504
3110079O15Rik	0.00372492	0.00702028	0.00212774	0.010341	0.00104377	0	0	0	0.00113595	0	0	0	0	0	0	0	0	0	0	0	0	0	0	0	0	0	0	0	0	0.00038016	0	0	0	0	0	0	0	0	0	0	0	0.000875924	0	0	0.00173523	0	0	0	0
Ngef	0.0190512	0.0081259	0.0346264	0.0121601	0.00948299	0	0.00295337	0.00055202	0	0.00129523	0.00115854	0.0100784	0.00635726	0.00367001	0.00531456	0	0	0.00184362	0.000874249	0.00210217	0.0125465	0	0.0123259	0	0.00975189	0.00109515	0.00349659	0.00191017	0.00147215	0.000570994	0	0	0.0045122	0	0	0.00602976	0	0.00733816	0.00375695	0.0100467	0.00790683	0.0129154	0.0246241	0.00848941	0.0190194	0.00767302	0.00176966	0.00821962	0.00248226
Neu2	0	0	0	0	0	0	0	0	0	0	0	0.00375005	0	0	0	0	0	0	0	0	0	0	0	0	0	0.000938643	0.000574683	0	0.000979654	0	0	0	0	0	0	0	0	0	0	0	0	0	0	0	0	0	0	0	0
Inpp5d	0	0	0	0	0	0	0	0.000773175	0	0.000393437	0.000523085	0	0.00492941	0	0.00116119	0	0	0	0	0	0.00212226	0	0.00508527	0.00138222	0	0	0	0	0	0.00163648	0	0	0	0	0	0.00211016	0	0	0	0	0	0	0	0	0	0.00132052	0	0	0
Atg16l1	0.158096	0.107413	0.118491	0.123357	0.184467	0.263083	0.210753	0.169505	0.174	0.226945	0.276151	0.323323	0.318805	0.238017	0.250821	0.242424	0.224624	0.151658	0.220301	0.226838	0.170271	0.223814	0.176748	0.165788	0.179223	0.24905	0.24056	0.210568	0.199559	0.217017	0.569238	0.453154	0.428227	0.264907	0.362319	0.159064	0.18768	0.177443	0.144818	0.203904	0.169285	0.116324	0.185485	0.157152	0.123595	0.149613	0.0905356	0.149284	0.114556
Sag	0.0475323	0.0509804	0.0287309	0.0231922	0.0303839	0.0626518	0.024121	0.0116217	0.0253602	0.0339924	0.0374131	0.0197512	0.0267472	0.0326773	0.0434654	0.144233	0.0103449	0.0251222	0.0220189	0.0301606	0.0735362	0.031094	0.0318267	0.0186544	0.0291253	0.031161	0.0256308	0.0185573	0.0165464	0.030824	0.0730604	0.109559	0.0593657	0	0.0882867	0.0454299	0.0420426	0.0650879	0.0310236	0.0277657	0.0501081	0.062772	0.0777947	0.0651152	0.041291	0.0515584	0.0208368	0.0316315	0.0445875
Dgkd	0.200378	0.22715	0.155821	0.117533	0.154102	0.384799	0.272557	0.195931	0.192875	0.223953	0.361714	0.334144	0.220525	0.281253	0.252672	0.216681	0.205947	0.193316	0.20848	0.19836	0.202823	0.151112	0.200036	0.230332	0.197003	0.343608	0.272211	0.173899	0.167458	0.232813	0.840175	0.566661	0.304195	0.20859	0.382424	0.189407	0.248295	0.172073	0.0874986	0.159605	0.20477	0.214269	0.206419	0.155326	0.173771	0.16183	0.194166	0.165574	0.201183
Gm19582	0	0	0	0	0	0	0.00112695	0	0	0	0.000636818	0	0	0	0	0	0	0.000563054	0.000686194	0	0	0	0	0	0	0	0	0	0	0.000632789	0	0.00536337	0	0	0	0	0	0	0	0	0	0	0	0	0	0	0	0	0
Usp40	0.255969	0.225728	0.240884	0.185049	0.253434	0.443499	0.347463	0.333805	0.334049	0.433622	0.450686	0.441179	0.442295	0.436222	0.525395	0.531872	0.320233	0.278069	0.301669	0.333932	0.308214	0.346266	0.264712	0.249812	0.300499	0.397485	0.360232	0.341039	0.293102	0.400175	0.914984	0.780878	0.642802	0.393037	0.628097	0.315291	0.250658	0.315082	0.244219	0.310396	0.358733	0.232132	0.309459	0.315651	0.313027	0.30548	0.18087	0.220597	0.294837
Ugt1a10	0	0	0	0	0	0	0	0	0	0	0	0	0	0	0	0	0	0	0	0	0	0	0	0	0	0	0	0	0	0	0	0	0	0	0	0	0	0	0	0	0	0	0	0	0	0	0	0	0
Ugt1a9	0	0	0	0	0	0	0	0	0	0	0	0	0	0	0	0	0	0	0	0	0	0	0	0	0	0	0	0	0	0	0	0	0	0	0	0	0	0	0	0	0	0	0	0	0	0	0	0	0
Ugt1a8	0	0	0	0	0	0	0	0	0	0	0	0	0	0	0	0	0	0	0	0	0	0	0	0	0	0	0	0	0	0	0	0	0	0	0	0	0	0	0	0	0	0	0	0	0	0	0	0	0
Ugt1a7c	0.013298	0.00172976	0	0	0.000617289	0	0	0	0	0	0	0	0	0	0	0	0	0	0	0	0.0287658	0.0077395	0.0238812	0.00319077	0.00311345	0	0	0	0	0	0	0	0	0	0	0.0118524	0.00530034	0.0138135	0	0	0.015323	0.00265543	0	0.00213457	0.00207518	0.0123608	0.0105797	0	0.0029333
Ugt1a6b	0	0	0	0	0	0	0	0	0	0	0	0	0	0	0	0	0	0	0	0	0	0	0	0	0	0	0	0	0	0	0	0	0	0	0	0	0	0	0	0	0	0	0	0	0	0	0	0	0
Ugt1a6a	0.00288722	0	0	0.00393191	0	0	0	0	0	0	0.000955228	0	0	0	0	0	0.00772291	0	0	0	0.027805	0	0	0.00812618	0.00109918	0.00044521	0	0	0	0	0	0	0.000999862	0	0	0.00320226	0	0	0.00433811	0.00253265	0.00532801	0.00177355	0	0.00900974	0.00131965	0.00809389	0	0	0.00248226
Ugt1a5	0	0	0	0.00202274	0.00364275	0	0	0	0	0	0	0	0	0	0	0	0	0	0	0	0.00416311	0	0	0.00321429	0	0	0	0	0	0	0	0	0	0	0	0	0	0	0	0	0	0	0	0	0	0	0	0	0.00248226
Ugt1a2	0	0	0	0	0	0	0	0	0	0	0	0	0	0	0	0	0	0	0	0	0	0	0	0	0	0	0	0	0	0	0	0	0	0	0	0	0	0	0	0	0.00107502	0	0	0	0	0	0	0	0
Dnajb3	0.0440771	0.0200898	0.0192927	0.0331684	0.0236004	0.00183974	0.00869424	0.0208791	0.0192569	0.028853	0.010929	0.0124238	0.0194371	0.0138001	0.0143068	0.0121471	0.00818749	0.0159038	0.0263234	0.0231528	0.0145774	0	0.0217311	0.0259228	0.021831	0.0166469	0.0171133	0.0258237	0.0183542	0.0258322	0	0.00854577	0.00334333	0	0.0314926	0.0171623	0.0182013	0.00724696	0.0185816	0.0216402	0.0281583	0.0296299	0.0175852	0.0224976	0.0172155	0.0262966	0.0294469	0.0213006	0.014708
Ugt1a1	0	0	0	0	0	0	0	0	0	0	0	0	0	0	0	0	0	0	0	0	0	0	0	0	0	0	0	0	0	0	0	0	0	0	0	0	0	0	0	0	0	0	0	0	0	0	0	0	0
Mroh2a	0.00486176	0.0215924	0.00685419	0.0128952	0.003615	0.00442562	0.0304632	0.0128628	0.0149321	0.0116616	0.00569697	0.0102078	0.0128642	0	0.000891047	0	0	0.0138599	0.00778183	0.0105852	0	0	0.011956	0.00394434	0.0033198	0.00450511	0.0254773	0.0263732	0.0243451	0.0166999	0.00655192	0.0394124	0.0681784	0	0.133804	0.00207014	0.00523399	0.00595145	0	0.00386916	0.00398165	0.00641037	0.00277322	0.00397993	0.00313163	0.000603015	0.0113273	0.00204836	0.0062061
Hjurp	0.612052	0.852293	0.941152	0.874556	0.762852	0.752572	2.07205	2.49075	1.7988	1.75484	0.540647	1.18407	1.43737	1.22571	1.05896	0.903349	1.49212	1.74051	1.61675	1.34056	0.389829	0.690227	0.684818	0.631098	0.637975	0.942751	2.36804	3.35383	2.3554	2.50783	1.49626	3.51827	5.23071	2.70455	3.04029	0.392354	0.703677	0.730567	0.68654	0.730668	0.294698	0.499088	0.529564	0.30189	0.462196	0.340771	0.646787	0.527237	0.501882
Trpm8	0	0	0	0	0	0	0	0	0	0	0	0	0	0	0	0	0	0	0	0	0	0	0	0	0	0	0	0	0	0	0	0	0	0	0	0	0	0	0	0	0	0	0	0	0	0	0	0	0
4930453O03Rik	0	0	0	0	0	0	0	0	0	0	0	0	0	0	0	0	0	0	0	0	0	0	0	0	0	0	0	0	0	0	0	0	0	0	0	0	0	0	0	0	0	0	0	0	0	0	0	0	0
Spp2	0	0	0	0	0	0	0	0	0	0	0	0	0	0	0	0	0	0	0	0	0	0	0	0	0	0	0	0	0	0	0	0	0	0	0	0	0	0	0	0	0	0	0	0	0	0	0	0	0
Gm29538	0	0	0	0	0	0	0	0	0	0	0	0	0	0	0	0	0	0	0	0	0	0	0	0	0	0	0	0	0	0	0	0	0	0	0	0	0	0	0	0	0	0	0	0	0	0	0	0	0
Gm28888	0	0	0	0	0	0	0	0	0	0	0	0	0	0	0	0	0	0	0	0	0	0	0	0	0	0	0	0	0	0	0	0	0	0	0	0	0	0	0	0	0	0	0	0	0	0	0	0	0
Glrp1	0	0	0	0	0	0	0	0	0	0	0	0	0	0	0	0	0	0	0	0	0.00203393	0	0	0	0	0	0	0	0	0	0	0	0.00468179	0	0	0	0	0	0	0	0	0	0.000871827	0.0014153	0	0	0	0	0
Gm19589	0	0	0	0	0	0	0	0	0	0	0	0.00208931	0.00318907	0	0	0	0	0	0	0	0	0.00233386	0	0	0	0	0	0	0	0	0	0	0	0	0	0	0.00300756	0	0	0	0	0	0	0	0.00119445	0	0.00226197	0	0.0024843
Gm29336	0	0	0	0	0	0	0	0.000549056	0	0	0.000447537	0	0	0	0	0	0	0	0.000873307	0.00130597	0	0	0	0	0	0	0	0	0.00246834	0	0	0	0	0	0	0	0	0	0	0	0	0.00152866	0	0.00242651	0.000941722	0.00151144	0	0	0.00101576
Arl4c	0.126857	0.140101	0.0827123	0.0726308	0.0469113	0.126823	0.170175	0.0962021	0.0624864	0.0726224	0.414992	0.535806	0.448972	0.465034	0.227284	0.15645	0.314679	0.123314	0.105765	0.0926714	0.233339	0.227766	0.191995	0.241015	0.143006	0.167942	0.169324	0.0790067	0.0997968	0.0539776	0.216038	0.177187	0.141658	0.0769059	0.077692	0.327936	0.391156	0.25433	0.357617	0.151497	0.17536	0.21191	0.214468	0.349017	0.19428	0.60322	0.431603	0.281256	0.508677
Platr5	0	0	0	0	0	0	0	0	0	0	0	0	0	0	0	0	0	0	0	0	0	0	0	0	0.000975106	0	0	0	0.00194732	0	0	0	0	0	0	0	0	0	0	0	0	0	0.00196533	0	0.00103816	0	0	0	0
Gm29337	0	0	0	0	0	0	0	0	0	0	0.000612208	0	0	0	0	0	0	0	0	0	0	0	0	0	0	0	0	0	0	0	0	0	0	0	0	0	0	0	0	0	0	0	0	0	0	0	0	0	0
1700067G17Rik	0	0	0	0	0	0	0	0.000649886	0.00080373	0.00139507	0.00101526	0.00085832	0.00185528	0	0	0	0	0	0.000873307	0.000621126	0	0	0	0	0	0	0.000652254	0.00369661	0.00155654	0.0017082	0	0	0	0	0	0	0	0	0	0	0	0	0	0	0	0	0	0	0
Sh3bp4	0.11895	0.1269	0.165107	0.163035	0.146953	0.13932	0.138857	0.325992	0.210569	0.284947	0.171133	0.164603	0.219401	0.196316	0.2408	0.186952	0.219159	0.201457	0.231291	0.219047	0.0845556	0.0697061	0.162804	0.113568	0.158174	0.163688	0.133446	0.211017	0.190328	0.224194	0.186971	0.175372	0.203345	0.0891255	0.146221	0.159963	0.193781	0.22736	0.257033	0.32108	0.115219	0.104979	0.138995	0.16161	0.140042	0.130221	0.145856	0.196052	0.148533
Gm28342	0	0	0	0	0	0	0	0	0	0	0	0	0	0	0	0	0	0	0	0	0	0	0	0	0	0	0	0	0	0	0	0	0	0	0	0	0	0	0	0	0	0	0	0	0	0	0	0	0
C030007H22Rik	0	0	0	0	0	0	0	0	0	0	0	0	0	0	0	0	0	0	0	0	0	0	0	0	0	0	0	0	0	0	0	0	0	0	0	0	0	0	0	0	0.000791518	0	0	0	0	0	0	0	0
Agap1	0.350543	0.454259	0.447825	0.436466	0.383563	0.41629	0.485386	0.395014	0.366137	0.364044	0.367934	0.480845	0.399288	0.318908	0.345106	0.356091	0.408177	0.395366	0.378727	0.384955	0.374014	0.420024	0.632957	0.526901	0.400886	0.4006	0.524141	0.438791	0.394173	0.409856	0.535089	0.956107	0.709542	0.38765	0.501928	0.406992	0.408916	0.405387	0.250003	0.20831	0.441255	0.622715	0.588634	0.416469	0.454417	0.383963	0.369567	0.48741	0.334482
Gbx2	0.00259885	0	0	0	0	0	0	0	0	0	0	0	0	0	0	0	0	0	0	0	0	0	0	0	0	0	0	0	0	0	0	0	0	0	0	0	0	0	0	0	0	0.000931634	0	0	0	0.00102485	0	0	0
Asb18	0	0	0	0.00585433	0	0	0	0	0	0	0	0	0	0	0	0	0	0	0	0	0	0	0	0	0	0	0	0	0	0.000676779	0	0	0	0	0	0	0	0	0	0	0	0	0.00160671	0	0	0	0	0	0
Iqca	0	0	0	0.00208106	0	0	0	0	0.000642434	0	0.00100072	0.000905093	0	0	0	0	0	0	0	0	0	0	0	0	0	0	0.000948448	0	0	0.000464349	0	0	0	0	0	0	0	0	0	0	0	0.00136128	0	0	0	0	0	0	0
4930434B07Rik	0	0	0	0	0	0	0	0.000489525	0	0	0	0	0	0	0.00358926	0	0	0	0	0	0	0	0	0	0	0	0	0	0	0	0	0	0	0	0	0	0	0	0	0	0	0	0	0	0	0	0	0	0
Ackr3	0.0407137	0.0537872	0.0318966	0.032897	0.0241389	0.387217	0.323382	0.130048	0.107343	0.132496	0.27051	0.206148	0.304822	0.22974	0.43779	0.148309	0.249653	0.212363	0.192019	0.26517	0.0254758	0.0640435	0.0547564	0.0168808	0.0136289	0.223435	0.277709	0.11441	0.068222	0.147312	0.166471	0.279933	0.174672	0.0821994	0.157764	0.0227893	0.0231222	0.0443812	0.00846709	0.00498686	0.0249704	0.0468413	0.0267515	0.0106968	0.0422283	0.05781	0.0997845	0.126588	0.107428
Gm28721	0.00137358	0	0	0	0	0	0	0	0	0	0	0	0	0	0	0	0	0	0	0	0	0	0	0	0	0	0	0	0	0	0	0	0	0	0	0	0	0	0	0	0	0	0	0	0	0	0	0	0
Gm28723	0.000931272	0	0	0	0	0.00467592	0.00491701	0.00112872	0.00201234	0.00199303	0.0021019	0.00382542	0.0037161	0.00871048	0.0075013	0	0	0.00404504	0.00425552	0.00860206	0	0.00283362	0.00500727	0	0	0.00666857	0.0070699	0.00138754	0.00178225	0.0006774	0.010657	0.0148661	0.00601545	0.0215834	0	0	0	0	0	0	0	0	0	0	0	0	0	0.00375339	0
Gm28722	0.00106617	0.00159518	0.000751535	0	0.00100406	0.00982194	0.0201566	0.00950723	0.0116567	0.007111	0.00042084	0.000961786	0	0	0	0	0.00499616	0.00466209	0.00446349	0.00299246	0.000967578	0.0030731	0.00223436	0	0	0.00182221	0.0100739	0.00376887	0.00404241	0.00326793	0	0.0105218	0	0	0	0	0	0	0	0	0.00196692	0	0.00220007	0	0.0027344	0.0013232	0.00142816	0	0.00163997
Cops8	0.628733	0.519167	0.469561	0.498312	0.649495	0.825141	0.672922	0.544024	0.728866	0.810009	0.802553	0.740558	0.744102	0.86556	0.875187	0.778563	0.67674	0.583262	0.701899	0.751391	0.552423	0.574323	0.474312	0.441829	0.66616	0.790365	0.648094	0.594434	0.695113	0.792993	0.681023	0.656914	0.734445	0.406985	0.844993	0.709175	0.576681	0.680238	0.648574	0.753184	0.611547	0.532009	0.600945	0.656685	0.711526	0.64609	0.544051	0.521089	0.563738
Gm9991	0	0	0.000711082	0	0	0	0	0	0.0018074	0	0	0	0	0	0	0	0	0	0	0	0.00136387	0.00566155	0.00230304	0.008912	0	0	0	0	0	0	0	0	0	0	0	0	0	0	0	0	0	0	0.00136272	0	0	0	0	0	0
Col6a3	3.31023	1.54285	1.23472	2.01815	1.8093	0.409877	0.208696	0.19276	0.169356	0.258186	0.171407	0.278488	0.338836	0.678494	0.777673	0.581132	0.309112	0.238051	0.26116	0.275226	4.627	2.36839	1.71921	2.88918	2.7917	0.15327	0.15757	0.0808129	0.16686	0.229032	0.514514	0.410128	0.332127	0.235129	0.418155	2.42273	1.61367	1.00276	1.8465	1.71532	2.39983	1.50326	1.35149	2.10304	2.41485	4.2979	2.27372	2.2092	3.18629
Mlph	0	0	0	0	0	0.0255368	0.00376096	0	0.000673654	0	0.0119049	0.0258228	0.0139969	0.0527107	0.033102	0.0450128	0.00765256	0	0.00409871	0.00114313	0	0	0	0	0.00296703	0.0151148	0.00847168	0.00566205	0.00691322	0.00597945	0.0135802	0.0194655	0.0139233	0	0.0167388	0.00406309	0	0	0	0.00171697	0	0	0.00816255	0.0045226	0.00763433	0	0.00276746	0	0.00134881
Prlh	0	0	0	0	0	0	0	0	0	0.00043163	0.000697102	0	0	0	0	0	0	0	0	0	0	0	0	0	0	0	0	0.00120872	0	0.000621851	0	0	0	0	0	0	0	0	0	0	0	0	0	0	0	0	0	0	0
Rab17	0.00145203	0	0.0013298	0.00102698	0	0.00398381	0.00680451	0.00443139	0.0015169	0.00290598	0.000499458	0.0142299	0.00426043	0.0074645	0.00882688	0.0304451	0.0137382	0.0027587	0.00247845	0.011606	0	0	0	0	0.000709174	0	0.00153865	0.00080471	0.00106081	0.00125046	0.0156803	0	0	0	0	0	0	0	0	0	0	0	0	0	0	0	0	0	0
Gm28199	0	0	0	0	0	0	0	0	0	0	0	0	0	0	0	0	0	0	0	0	0	0	0	0	0	0	0	0	0	0	0	0	0	0	0	0	0	0	0	0	0	0	0	0	0	0	0	0	0
Lrrfip1	0.581339	0.702555	0.790629	0.482911	0.431796	0.288112	0.643227	0.808471	0.246311	0.168522	0.283506	0.365745	0.347299	0.191044	0.148016	0.798637	0.71137	0.926198	0.456577	0.281409	0.510244	0.784449	0.660446	0.418698	0.403016	0.198247	0.364609	0.47902	0.175329	0.127616	0.203052	0.434715	0.555404	0.140371	0.154765	0.538696	0.590599	0.644834	0.440426	0.356744	0.558256	0.707234	0.688726	0.595541	0.422004	0.671465	0.913711	0.926904	0.722092
Rbm44	0.00305439	0.0108568	0.000912834	0.0030042	0	0	0.000932771	0.0014509	0.00119725	0	0	0	0	0	0	0	0	0.000743281	0.000847175	0.000432882	0.0329091	0.0290305	0.0157248	0.00128957	0	0.00181794	0.00283058	0	0.00305275	0.00259411	0	0	0	0	0	0.00469398	0.00836866	0.0101827	0	0	0.0102224	0.020503	0.00730196	0.0117561	0.000605786	0.00401514	0.0113402	0	0.0120438
Ramp1	1.51019	0.838028	0.623124	0.629566	0.448524	0.552878	0.268724	0.229347	0.192057	0.217304	0.177276	0.201633	0.243993	0.1898	0.179025	0.721859	0.496617	0.222396	0.272905	0.238473	0.0238049	0.0176338	0.0201249	0.00893945	0.0106622	0.163109	0.191461	0.184661	0.214607	0.180918	0.0958451	0.103748	0.107199	0.0914073	0.236113	0.0449152	0.0424236	0.0580686	0.15797	0.16286	0.00849329	0.00491632	0.0132325	0.00253422	0.00551366	0.0507478	0.0612436	0.0547948	0.0157139
Ube2f	0.325683	0.348542	0.348362	0.234897	0.303216	0.590173	0.576479	0.493228	0.542484	0.530963	0.55643	0.583941	0.70367	0.483741	0.504705	0.636892	0.554533	0.52818	0.418723	0.478098	0.25582	0.244179	0.23668	0.223555	0.256413	0.539929	0.625082	0.552561	0.487606	0.547662	0.38782	0.419019	0.368177	0.249294	0.304435	0.250928	0.333967	0.313508	0.25448	0.227373	0.33778	0.431679	0.428934	0.358626	0.401682	0.277866	0.348185	0.35272	0.327037
Gm26683	0	0.0122699	0	0	0	0	0.0036226	0.00098908	0	0.000868886	0.000995432	0.00122113	0.00169579	0	0	0	0	0.00105064	0	0	0	0	0.00838603	0	0	0	0.00105228	0.00175797	0.00127498	0	0	0.0306406	0	0	0.0146218	0	0.00747098	0.00605494	0	0	0.0017404	0.00130168	0.00155702	0	0	0	0	0	0
Scly	0.0368908	0.0281116	0.0275093	0.0276536	0.0221558	0.0239121	0.0122333	0.0214634	0.0226318	0.0310928	0.0177674	0.0248756	0.0339529	0.0196775	0.0284543	0.0543451	0.0247177	0.0234274	0.0181661	0.0178748	0.0245547	0.03113	0.0176677	0.0274054	0.0333457	0.0170004	0.0208346	0.0289023	0.0187302	0.0226976	0.0549833	0.0146789	0.0657484	0.0124002	0.0139696	0.021322	0.0121254	0.0481169	0.018178	0.0202059	0.0350953	0.0292128	0.0476826	0.0432723	0.0199747	0.0289061	0.04296	0.0276082	0.0273413
Gm17090	0.000808262	0	0	0	0.000771214	0	0	0	0	0	0	0	0	0	0	0	0	0	0	0	0.00268869	0	0	0	0	0	0	0.00292499	0	0	0	0	0	0	0	0	0	0	0	0	0	0.00356689	0	0.00330173	0	0	0.00723492	0	0
Espnl	0	0	0.000755889	0	0.000592054	0	0	0	0	0	0	0	0	0	0	0	0	0	0	0	0	0	0.00313685	0	0	0	0	0.00121325	0	0	0	0	0	0	0	0	0	0	0	0	0	0	0.00299055	0	0.000869547	0	0	0.00374962	0
Klhl30	0	0	0.00296569	0.000593367	0	0	0	0.00877196	0.0042362	0.000335031	0	0.00151108	0	0	0	0	0	0.0102325	0.00710643	0.0065078	0	0	0	0	0.00167229	0.00256868	0	0.0187839	0	0.00144344	0.029801	0	0.00406545	0.0141384	0	0	0	0	0	0	0	0	0	0	0	0	0	0	0
Erfe	0	0.00166014	0.00080965	0	0.00242973	0	0.00486092	0.00536214	0	0.00214238	0.00104111	0	0.00159516	0.00223181	0	0	0	0.0025844	0.000892633	0.000985731	0	0	0.0100389	0	0	0.000982589	0.00619277	0.0240632	0.0122175	0.0042441	0	0.0112213	0.0115617	0	0	0	0	0	0	0.00114465	0	0.00455222	0.00134801	0.00485739	0.000612955	0	0	0	0
Ilkap	0.626751	0.664845	0.645232	0.641292	0.662328	0.570824	0.705783	1.08592	0.847963	0.863583	0.646643	0.71481	0.775452	0.624564	0.693989	0.742018	0.987651	1.42449	1.20783	1.48663	0.542653	0.623319	0.636643	0.688183	0.775758	0.773294	0.820808	0.797801	0.799116	0.828002	0.426004	0.616121	0.565009	0.5047	0.770597	0.585085	0.679347	0.595116	0.641723	0.798898	0.598903	0.632556	0.638085	0.604627	0.630548	0.55565	0.705761	0.760486	0.680577
1700020N18Rik	0	0	0	0	0	0	0	0	0	0	0	0	0	0	0	0	0	0	0	0	0	0	0	0	0	0	0	0	0	0	0	0	0	0	0	0	0	0	0	0	0	0	0	0	0	0	0	0	0
Hes6	0.188978	0.159397	0.222692	0.173698	0.162612	0.19913	0.173341	0.188309	0.200834	0.20703	0.18047	0.173353	0.234168	0.175688	0.16707	0.274085	0.185539	0.317698	0.315153	0.38605	0.172321	0.198763	0.171145	0.133698	0.159282	0.145498	0.140948	0.140679	0.149955	0.156755	0.143551	0.0639327	0.124867	0.0752407	0.163813	0.214424	0.159197	0.225736	0.136138	0.189847	0.140102	0.113254	0.13845	0.153731	0.133828	0.186499	0.133966	0.15374	0.102225
Per2	0.0647189	0.0731619	0.030589	0.044365	0.0388059	0.0327701	0.025873	0.0120246	0.0333531	0.035716	0.0444117	0.0741156	0.0881298	0.10369	0.0546107	0.0547302	0.0454752	0.0189878	0.0470959	0.0561455	0.0594334	0.0552611	0.0542531	0.0618638	0.0211347	0.0244239	0.0385285	0.0287207	0.0228981	0.0294637	0.119848	0.0992332	0.052089	0.0532249	0.0503964	0.045723	0.101731	0.0516644	0.00657103	0.0270348	0.0623063	0.0385224	0.0374961	0.0196669	0.0299413	0.0710826	0.0475297	0.0474071	0.0474699
Gm28382	0	0	0	0	0	0	0	0	0	0	0	0	0	0	0	0	0	0	0	0	0	0	0	0	0	0	0	0	0	0	0	0	0	0	0	0	0	0	0	0	0.000782127	0	0	0	0	0	0	0	0
Traf3ip1	0.121093	0.131442	0.114645	0.0995832	0.0890377	0.146071	0.146465	0.0860007	0.132749	0.148012	0.188585	0.234704	0.201268	0.219546	0.17131	0.112547	0.170086	0.0948582	0.153678	0.1662	0.134045	0.0836098	0.0901461	0.0855975	0.116838	0.197138	0.211892	0.160247	0.169136	0.187061	0.162356	0.188308	0.0929302	0.199074	0.0835162	0.119996	0.110452	0.134205	0.121663	0.133815	0.0764182	0.0874666	0.074701	0.0870785	0.103597	0.105735	0.139719	0.0750809	0.0939867
Asb1	0.0437471	0.0633044	0.0745163	0.0538453	0.0666275	0.0294057	0.0176792	0.0335636	0.0434839	0.0504298	0.0154841	0.0269503	0.0233258	0.00911988	0.0337535	0.0221928	0.019696	0.0348352	0.031029	0.0498853	0.0495396	0.0711351	0.0590843	0.0607604	0.0717886	0.0130452	0.0227414	0.0201895	0.0249468	0.0344934	0.0215804	0.0312798	0.0594246	0.105932	0.0255277	0.0343393	0.0437437	0.0480732	0.0500413	0.061938	0.0417514	0.0359951	0.0439208	0.0542956	0.0541144	0.0387717	0.0597115	0.0443048	0.0570413
Gm28380	0.00139164	0	0	0	0	0	0	0	0	0	0	0	0	0	0	0	0	0	0	0	0	0	0	0	0	0	0	0	0	0	0	0	0	0	0	0	0	0	0	0	0	0	0	0	0	0	0	0	0
Gm29100	0	0	0	0.00614238	0.00131195	0	0	0	0	0	0	0	0	0	0	0	0	0	0.00106244	0	0	0	0.00584822	0	0.000994629	0	0	0	0	0	0	0	0	0	0	0.00113517	0	0	0	0	0.00146585	0	0	0	0.000938705	0	0	0	0
Twist2	0.0695543	0.0617924	0.0450555	0.00720927	0.0160251	0	0.00571237	0.00197821	0.00149919	0.0102691	0.00223806	0	0	0	0	0.0274981	0	0.00112295	0.00145322	0.0150047	0.150171	0.0830773	0.108666	0.0582607	0.0815988	0.00153561	0.00187593	0.00251937	0.00527713	0.00811609	0.0181895	0.0132764	0	0	0.00934241	0.193414	0.129319	0.0538536	0.0792944	0.0626999	0.143806	0.154724	0.178466	0.111226	0.10951	0.154955	0.103466	0.0810962	0.0680471
Hdac4	0.389475	0.327218	0.300322	0.245356	0.252782	1.31138	0.746612	0.426709	0.496265	0.531704	1.29859	1.31227	0.740271	1.01687	1.10604	0.607185	0.747315	0.342966	0.37452	0.468582	0.332314	0.44219	0.39766	0.35516	0.340742	1.12494	0.817405	0.40808	0.577496	0.64844	1.97919	1.67575	0.85054	0.831613	0.500672	0.36567	0.388301	0.258266	0.297168	0.342978	0.316847	0.302635	0.304819	0.313287	0.270274	0.354263	0.444498	0.359812	0.421493
Gm26720	0.0113291	0.0237191	0.0380818	0.0234635	0.00596442	0.0289859	0.0385046	0.0188043	0.0414876	0.0194683	0.0228887	0.0832843	0.0605803	0.0557424	0.0526213	0	0	0.0181425	0.0202957	0.00981574	0.0108928	0.0170209	0.0288348	0.02301	0.0159895	0.0240551	0.0364534	0.018499	0.0425423	0.0225936	0.173718	0.310288	0.165285	0.0651828	0.129746	0.0108574	0.0214865	0.0257273	0.0134302	0.00647832	0.00419353	0.00928913	0.0136668	0.0193059	0.011634	0.0114284	0.0332512	0.0175955	0.0140834
Gm29099	0	0	0	0	0	0	0	0	0	0	0	0	0	0	0	0	0	0	0	0	0	0	0	0	0	0	0	0	0	0	0	0	0	0	0	0	0	0	0	0	0	0	0	0	0	0	0	0	0
Ndufa10	1.35445	1.1892	1.24692	1.03561	1.26593	1.8332	2.22929	2.06531	1.53778	1.59208	1.58433	1.66115	1.7838	1.41434	1.54008	1.8478	1.95175	1.67382	1.51216	1.57152	1.39472	1.14361	1.16694	1.0156	1.39673	1.70816	2.32242	2.59986	2.00835	2.04204	0.83953	1.34184	1.04078	0.457837	1.06058	1.2209	1.15686	1.22792	0.84377	1.22239	1.65907	1.70173	1.69824	1.30792	1.56703	1.47696	1.26588	1.43461	1.17038
Olfr1416	0	0	0	0	0	0	0	0	0	0	0	0	0	0	0	0	0	0	0	0	0	0	0	0	0	0	0	0	0	0	0	0	0	0	0	0	0	0	0	0	0	0	0	0	0.000993475	0	0	0	0
Olfr1415	0	0	0	0	0	0	0	0	0	0	0	0	0	0	0	0	0	0	0	0	0	0	0	0	0	0	0	0	0	0	0	0	0	0	0	0	0	0	0	0	0	0	0	0	0	0	0	0	0
Olfr1414	0	0	0	0	0	0	0	0	0	0	0	0	0	0	0	0	0	0	0	0	0	0	0	0	0	0	0	0	0	0	0	0	0	0	0	0	0	0	0	0	0	0	0	0	0	0	0.00242094	0	0
Olfr1413	0	0	0	0	0	0	0	0	0	0	0	0	0	0	0	0	0	0	0	0	0	0	0	0	0	0	0	0	0	0	0	0	0	0	0	0	0	0	0	0	0	0	0	0	0	0	0	0	0
1700054K02Rik	0	0	0	0	0	0	0	0	0	0	0	0	0	0	0	0	0	0	0	0	0	0	0	0	0	0	0	0	0	0	0	0	0	0	0	0	0	0	0	0	0	0	0	0	0	0	0	0	0
Olfr1412	0	0	0	0	0	0	0	0	0	0	0	0	0	0	0	0	0	0	0	0	0	0	0	0	0	0	0	0	0	0	0	0	0	0	0	0	0	0	0	0	0	0	0	0	0	0	0	0	0
Olfr1411	0	0	0	0	0	0	0	0	0	0	0	0	0	0	0	0	0	0	0	0	0	0	0	0	0	0	0	0	0	0	0	0	0	0	0	0	0	0	0	0	0	0	0	0	0	0	0	0	0
Olfr1410	0	0	0	0	0	0	0	0	0	0	0	0	0	0	0	0	0	0	0	0	0	0	0	0	0	0	0	0	0	0	0	0	0	0	0	0	0	0	0	0	0	0	0	0	0	0	0	0	0
Olfr12	0	0	0	0	0	0	0	0	0	0	0	0	0	0	0	0	0	0	0	0	0	0	0	0	0	0	0	0	0	0	0	0	0	0	0	0	0	0	0	0	0	0	0	0	0	0	0	0	0
Cops9	1.42739	1.21045	1.43441	1.2783	1.56459	1.4015	1.39122	1.53839	1.38513	1.68156	1.13929	1.16406	0.996905	0.8454	1.14777	1.28119	1.47948	1.35642	1.11723	1.4929	1.0496	0.960722	0.986608	0.905767	1.18208	1.20506	1.27647	1.57167	1.20689	1.49965	0.292795	0.343847	0.374281	0.207794	0.479328	1.03708	0.842963	1.05513	0.880269	1.21924	1.18825	1.1932	1.19107	1.08106	1.37101	1.07021	1.05717	1.02565	0.959506
Otos	0	0	0	0	0	0	0	0	0	0	0	0	0	0	0	0	0	0	0	0	0	0	0	0	0	0	0	0	0	0	0	0	0	0	0	0	0	0	0	0	0	0	0.00220007	0	0	0	0	0	0
Gm29483	0	0	0	0	0	0	0	0	0	0	0	0	0	0	0	0	0	0	0	0	0	0	0	0	0	0	0	0	0	0	0	0	0	0	0	0	0	0	0	0	0	0	0	0	0	0	0	0	0
Gm29482	0	0	0	0	0	0	0	0	0	0	0	0	0	0	0	0	0	0	0	0	0	0	0	0	0	0	0	0	0	0	0	0	0	0	0	0	0	0	0	0	0	0	0	0	0	0	0	0	0
Gm29481	0	0	0	0	0	0	0	0	0	0	0	0	0	0	0	0	0	0	0	0	0	0	0	0	0	0	0	0	0.00105209	0	0	0	0	0	0	0	0	0	0	0	0	0	0	0	0	0	0	0	0
Gpc1	0.264562	0.239816	0.263562	0.137993	0.129437	0.0754849	0.137237	0.039124	0.0616291	0.0550259	0.027619	0.0598311	0.0976667	0.0619615	0.0434418	0.0714583	0.246368	0.111141	0.104991	0.0928088	0.273102	0.315322	0.142734	0.102865	0.101669	0.0435645	0.143353	0.0873244	0.0459541	0.0543934	0.0954285	0.0992035	0.11512	0.0856943	0.100144	0.315475	0.32378	0.342254	0.186533	0.167977	0.212334	0.272578	0.308852	0.130277	0.136351	0.34567	0.400309	0.250524	0.120127
Gm29480	0	0	0	0.000813997	0.00122668	0	0	0.000944466	0	0.00054404	0.000771227	0.00142455	0	0	0	0	0	0	0.00178449	0.00058541	0	0	0	0	0	0	0.000801549	0	0	0	0	0	0	0	0	0	0.00213109	0	0.00928983	0	0.00126929	0.00286532	0	0.00142343	0	0	0.0035563	0	0.00193402
Ankmy1	0.011366	0.00982454	0.0047485	0.019148	0.00685642	0.010665	0.0133225	0.00276616	0.00750352	0.00371672	0.00467783	0.00842416	0.00676779	0.0109738	0.00478661	0.0243088	0.00359708	0.0077193	0.00973538	0.0105762	0.00125055	0	0.0135454	0.011307	0.0105264	0.00565071	0.0106366	0.00263246	0.00531219	0.00730447	0.00478987	0.0258181	0.0123339	0.0406375	0.0123423	0.0155369	0.0230676	0.0279457	0.0228362	0.010254	0.00291327	0.0114152	0.0203709	0.00936634	0.00863822	0.0165741	0.0159821	0.0222112	0.0122978
Dusp28	0.0613098	0.0601801	0.0424066	0.0509427	0.064797	0.0767924	0.0563138	0.0486512	0.0558645	0.0538049	0.078557	0.088663	0.0638456	0.090228	0.063571	0.111211	0.0952874	0.0356895	0.0474923	0.0406305	0.0684168	0.0437425	0.0689204	0.0678157	0.0685556	0.108055	0.0971052	0.091689	0.0665545	0.0827532	0.0284673	0.0375756	0.0198468	0	0.0327467	0.0771078	0.067012	0.0811173	0.0442197	0.0575364	0.05707	0.0565388	0.0283047	0.041128	0.0489224	0.0538668	0.0459603	0.0500575	0.076368
5033417F24Rik	0.00287935	0.00229424	0.00614801	0.00975915	0.00184833	0.00437939	0	0.00198205	0.0014507	0.0021841	0.000910907	0.00512531	0	0.00319232	0.00371576	0	0	0.000731195	0.0048169	0.00304008	0.0051981	0	0.0035123	0.00427404	0.00491074	0.00179801	0.0025723	0.00265205	0	0.00227539	0	0	0	0	0	0.00152772	0.00267167	0	0	0.00150555	0.00239288	0.00535704	0.0046824	0.00227942	0	0.00186436	0.00710754	0	0
Rnpepl1	0.229503	0.250998	0.254355	0.217196	0.229114	0.297543	0.376166	0.38092	0.317445	0.340286	0.326092	0.337163	0.330227	0.226366	0.264112	0.282843	0.394752	0.397715	0.306011	0.320778	0.198039	0.214333	0.281635	0.176567	0.245686	0.320925	0.353119	0.366939	0.280153	0.305669	0.541689	0.499984	0.557047	0.259277	0.240636	0.21516	0.210725	0.248262	0.169349	0.221698	0.229802	0.227904	0.253307	0.217297	0.213267	0.219142	0.233696	0.308634	0.137291
9430060I03Rik	0.0170269	0.0361514	0.0213898	0.0177181	0.0102823	0.0206447	0.00840667	0.0111092	0.0113297	0.0160518	0.00697801	0.00503595	0.0112915	0	0.0128348	0.0426768	0.0177671	0.012764	0.0127648	0.0315386	0.0267347	0.0295526	0.0244942	0.0269624	0.0268007	0.00741868	0.00647377	0.00395027	0.0125138	0.0112165	0.0309235	0.0210537	0.0196219	0.0267918	0.0155148	0.0142308	0.0268859	0.0190671	0.0162885	0.00666545	0.0153183	0.0159068	0.00815929	0.00844942	0.0105715	0.00947117	0.0145588	0.014623	0.0328848
Capn10	0.0739706	0.0629393	0.0322704	0.0714176	0.0706095	0.149802	0.119767	0.0828069	0.121081	0.156181	0.110778	0.0670975	0.0908751	0.0839413	0.129038	0.101542	0.0570221	0.053543	0.104367	0.146849	0.0488931	0.0101369	0.0553783	0.0926582	0.0781469	0.099937	0.0922107	0.0795185	0.106805	0.162621	0.11119	0.0639031	0.113927	0.0215532	0.111212	0.0693196	0.0530564	0.0598032	0.0348947	0.0866774	0.0592595	0.0518843	0.0577409	0.0636466	0.0641986	0.0443374	0.0450675	0.0316227	0.0405966
Gpr35	0.0018394	0	0.00125226	0.00352612	0	0.00216119	0.00109649	0	0.00118248	0.000627038	0.00365584	0.000427774	0.00716312	0	0.0042193	0	0	0.00251796	0.0022246	0.00298425	0.00405804	0	0.00627108	0.00112845	0.00113845	0.00273525	0.00172437	0	0	0.000491301	0	0	0	0	0	0.00293006	0.00549422	0.00719687	0.00395735	0.00166822	0.0120597	0.00426497	0	0.00173555	0.00185912	0.00178603	0.00195797	0.00196645	0.00391095
Aqp12	0.00208306	0.000680901	0	0	0.00119772	0.0636886	0.0137521	0.00314275	0.00429381	0.0036107	0.222815	0.298112	0.154324	0.178056	0.18555	0.0105526	0.0113069	0.000374635	0	0.000540476	0	0	0	0	0.00711328	0.131776	0.118999	0.0462747	0.0452602	0.0361618	0.0158536	0.0873629	0.0194028	0	0.0516755	0.000973072	0.00240002	0	0	0	0.00392651	0.00268638	0	0	0	0	0.00232361	0.003004	0
Kif1a	0.0477149	0.0275546	0.0111313	0.00958177	0.00845134	0.113901	0.0433585	0.00436654	0.0171265	0.0117047	0.197653	0.221593	0.162234	0.0944426	0.0735027	0.0962427	0.0939834	0.0222954	0.0248864	0.0210092	0.0456851	0.00788726	0.0159093	0.00164396	0.00408549	0.130905	0.0880342	0.0257305	0.0276559	0.0346336	0.272363	0.132991	0.114488	0.0630182	0.0834871	0.0540256	0.0665984	0.0685001	0.025646	0.0266355	0.0093739	0.013754	0.00281976	0.0136597	0.00476079	0.0527943	0.0265306	0.0379358	0.00471612
Gm28086	0.00187717	0	0	0	0.000588601	0.00380018	0	0	0.00084579	0	0.00715716	0.00577528	0.003915	0.00273634	0.00639544	0	0	0	0	0.000683694	0	0	0.00253875	0	0	0.00487482	0.00275591	0.00436935	0.00491146	0.00118627	0	0	0	0	0	0	0	0	0	0	0	0.00158609	0	0.00225472	0.000623142	0	0.00112004	0	0.00593155
Agxt	0	0	0	0	0	0	0	0	0	0	0	0	0	0	0	0	0	0	0	0	0	0	0	0	0	0.000786325	0	0	0	0.000724542	0	0	0	0	0	0	0	0	0	0	0	0	0	0	0	0	0	0	0
2310007B03Rik	0	0	0	0	0	0	0	0	0	0	0.00105575	0	0	0	0	0	0	0	0	0	0	0	0	0	0	0	0.000992565	0	0	0	0	0	0	0	0	0	0	0	0	0	0	0	0	0	0	0	0	0	0
Crocc2	0.00361389	0.00332106	0	0.00190918	0.000545594	0.010401	0.000716685	0	0	0	0.0179394	0.00730709	0	0.0096796	0.0104047	0	0.0121937	0.000434258	0.000900059	0.00195606	0.00510896	0	0.00216375	0.00239499	0.0108943	0.00478724	0.00349512	0.000844602	0.0061176	0.00189861	0.0282827	0.0273011	0.0153385	0	0.00934641	0.00303405	0.0144144	0.00936261	0	0	0.00401796	0.00566672	0.00299754	0	0.000982128	0	0.002716	0.0022652	0
Sned1	0.2559	0.331653	0.333675	0.281359	0.186461	0.651121	0.514774	0.183203	0.283924	0.24626	0.658268	0.629913	0.513078	0.682852	0.75379	0.766361	0.391068	0.152001	0.242946	0.315028	0.454305	0.436152	0.742651	0.626571	0.463796	0.593898	0.517946	0.354171	0.507644	0.524259	1.86669	2.0847	0.857701	1.00913	0.792849	0.867531	1.11949	0.895448	0.679214	0.630746	0.286556	0.249335	0.357161	0.21767	0.296813	0.314047	0.280048	0.30448	0.218677
Mterf4	0.106405	0.124929	0.176987	0.144899	0.196368	0.136298	0.207622	0.203521	0.199374	0.243004	0.195003	0.161477	0.162202	0.15939	0.236695	0.178602	0.186294	0.194043	0.170099	0.193801	0.123101	0.167736	0.155246	0.167235	0.217792	0.148985	0.166483	0.166486	0.143142	0.185865	0.125164	0.230709	0.19183	0.259113	0.19191	0.113751	0.158136	0.237183	0.2052	0.192347	0.0904388	0.122898	0.139522	0.136981	0.229623	0.104268	0.120967	0.153561	0.144292
Gm28535	0.00490791	0.00212041	0.0065388	0.0073787	0.00349546	0.00965825	0.0160408	0.00864673	0.00991466	0.00600561	0.0109416	0.00883656	0.00214665	0.0103714	0.0071168	0	0	0.00575389	0.0100092	0.00856633	0.0116529	0.00610127	0	0.00344754	0.00303153	0.00275896	0.00595614	0.00663222	0.00499627	0.00848075	0.010657	0	0.00421699	0	0.0335268	0.0167586	0.0139338	0.0139078	0.00641994	0.00313532	0.00641948	0.00953859	0.00255021	0.00726494	0.00374292	0.00595337	0	0.010355	0.00613123
Pask	0.00973896	0.0119307	0.00106583	0.00388079	0.0042713	0.0121702	0.0100945	0.00212974	0.00707941	0.00699692	0.00554201	0.00546121	0.0150613	0.00695673	0.0105964	0	0.00740241	0.00251864	0.00491992	0.00513941	0.00464073	0	0	0.0120639	0.0012432	0.0988989	0.0572121	0.0546311	0.082786	0.0791213	0.0293693	0.00615148	0.0146078	0	0.00908042	0.0232676	0.00800579	0.00396337	0.0031332	0.0122794	0.00624728	0.0127294	0.00479296	0.00390859	0.0121344	0.0071855	0.00373418	0	0.0187764
Ppp1r7	0.30515	0.300541	0.27758	0.32031	0.343664	0.357623	0.326382	0.37197	0.383062	0.37782	0.451115	0.386857	0.445213	0.424321	0.421998	0.360761	0.224294	0.390379	0.431185	0.44633	0.327511	0.259097	0.214542	0.253876	0.299925	0.559522	0.517094	0.487965	0.518596	0.516347	0.148152	0.229906	0.181647	0.152317	0.0722018	0.241701	0.26255	0.241092	0.34143	0.343588	0.349493	0.325949	0.328882	0.38364	0.36314	0.284278	0.248768	0.328643	0.292894
Ano7	0	0	0.000925663	0	0.00135096	0	0	0	0.00237127	0.00348244	0.00062902	0.00216223	0	0	0	0	0	0.000939375	0.00113569	0.00144543	0	0	0.00267901	0	0.000711569	0.0011388	0	0	0.00269517	0.00411222	0	0	0.00364447	0	0	0	0	0	0	0	0.00117998	0	0.00157307	0	0	0	0	0	0
Hdlbp	2.62097	3.64376	2.88063	2.10174	1.84548	3.42176	5.06834	4.77352	3.87068	3.67625	2.41059	3.42618	3.22618	2.41581	2.013	2.6254	3.59578	3.51312	2.91084	2.84504	3.01925	3.67781	2.91527	2.32403	2.02557	2.76195	4.42799	4.49942	3.47532	3.38009	2.64031	4.75786	4.24752	2.85258	2.79649	2.8647	3.55636	2.74405	2.2766	1.80696	3.45353	4.53347	4.2283	3.50501	3.10758	3.27124	4.19723	3.58534	3.17961
Sept2	0.145101	0.0874562	0.061369	0.0774824	0.0865296	0.0923676	0.0868166	0.107159	0.154422	0.11509	0.114754	0.142947	0.127433	0.166492	0.144413	0.192409	0.163027	0.109965	0.153407	0.126648	0.117239	0.0958764	0.0552424	0.068783	0.0647346	0.135315	0.0918751	0.104719	0.120468	0.106593	0.201026	0.180338	0.164856	0.0845523	0.151006	0.135987	0.109007	0.10924	0.0978771	0.070254	0.127131	0.0700868	0.110379	0.117825	0.106788	0.129502	0.0887942	0.0905242	0.15258
Sept2.1	0	0	0	0	0	0	0	0	0	0	0	0	0	0	0	0	0	0	0	0	0	0	0	0	0	0	0	0	0	0	0	0	0	0	0	0	0	0	0	0	0	0	0	0	0	0	0	0	0
Farp2	0.0446239	0.0975426	0.0633174	0.0516441	0.0473144	0.0446838	0.098964	0.0618058	0.0705252	0.066526	0.0351938	0.0568503	0.100251	0.0714708	0.0492867	0.0365357	0.0448249	0.0503273	0.0728437	0.0631073	0.0640345	0.0478476	0.0833612	0.108747	0.0579751	0.0322281	0.0623767	0.0708504	0.0836174	0.0616888	0.0539435	0.202796	0.164058	0.0234974	0.0619027	0.0818333	0.0870931	0.0575737	0.0860478	0.0632277	0.0800634	0.0781497	0.0836572	0.102258	0.0685269	0.0905723	0.0845229	0.0656037	0.105613
Stk25	0.428462	0.265039	0.203376	0.411696	0.3489	0.511731	0.266971	0.309792	0.546434	0.557738	0.468846	0.294489	0.237549	0.42312	0.431422	0.516507	0.245909	0.329687	0.545821	0.564336	0.470005	0.276858	0.166227	0.401182	0.446556	0.496614	0.264177	0.247618	0.425515	0.513353	0.43622	0.296465	0.266253	0.390271	0.469326	0.460557	0.248047	0.230998	0.455966	0.473124	0.52923	0.268667	0.283043	0.456525	0.567933	0.433849	0.203629	0.179034	0.394696
Gm28536	0	0	0.00166541	0	0	0	0	0	0	0.000746157	0	0	0	0	0	0	0	0.000340947	0	0	0	0	0	0	0	0	0	0.00202028	0.00106521	0	0	0	0	0	0	0	0	0	0	0	0	0	0	0	0	0.000813466	0.00387185	0	0
Bok	0.744702	0.620406	0.98199	1.17375	0.975187	0.342009	0.693714	0.935481	0.624972	0.484714	0.653375	0.671625	1.05003	0.748498	1.08469	0.349501	0.476939	1.05901	0.793487	0.571421	0.322522	0.311916	0.383811	0.298324	0.419192	0.955399	1.22402	1.57878	1.37594	1.44175	0.589803	0.619485	0.721205	0.283647	0.783203	0.26349	0.239443	0.377245	0.202218	0.387439	0.552192	0.619759	0.712387	0.640055	0.624299	0.253702	0.243555	0.273498	0.24946
Thap4	0.220458	0.149937	0.193293	0.15925	0.173962	0.28197	0.267547	0.29663	0.225032	0.263997	0.381211	0.312693	0.351785	0.263187	0.297695	0.308403	0.282771	0.267023	0.195657	0.211896	0.200626	0.144931	0.221883	0.168234	0.176033	0.352926	0.285249	0.304974	0.202193	0.263171	0.327812	0.34107	0.180307	0.116017	0.202019	0.211951	0.20194	0.172278	0.173278	0.20403	0.201974	0.182603	0.2495	0.149747	0.194392	0.196706	0.179134	0.144186	0.164964
Gm10550	0	0	0	0.00456715	0	0	0	0	0	0.00221292	0.000506244	0.000928393	0	0	0.00116119	0	0	0	0.00143211	0.000313933	0	0	0	0	0	0	0.000783991	0	0	0.00102037	0	0	0	0	0	0	0	0	0	0	0	0	0	0	0	0	0	0	0
Atg4b	0.162637	0.179812	0.230124	0.20131	0.212776	0.201393	0.280438	0.306922	0.28594	0.286407	0.270651	0.239345	0.337173	0.216373	0.256947	0.220757	0.281724	0.28815	0.279964	0.292062	0.149793	0.226741	0.298449	0.172444	0.231014	0.251263	0.280439	0.294571	0.259596	0.263862	0.316288	0.198616	0.284887	0.22259	0.262866	0.183382	0.168124	0.251603	0.153153	0.211649	0.176879	0.171316	0.266145	0.176198	0.250394	0.193619	0.148412	0.263186	0.121581
Dtymk	0.832365	0.687691	0.654101	0.643183	0.785224	1.07203	1.21476	1.02326	1.17791	1.13236	0.835198	0.713345	0.722006	0.858162	0.991581	0.823403	0.910914	0.814035	0.951097	1.0665	0.823036	0.699026	0.459033	0.547161	0.638997	1.86427	1.83322	1.87107	2.29146	2.11541	0.483525	0.567954	0.6794	0.537646	0.939748	0.877324	0.733671	0.649075	0.544282	0.736714	1.0296	0.908433	0.727747	0.925345	0.998399	0.99486	0.741257	0.545255	0.646743
Ing5	0.334147	0.322247	0.352377	0.299343	0.2836	0.45643	0.55061	0.546808	0.475817	0.475956	0.43452	0.610578	0.481899	0.554052	0.499643	0.398617	0.674515	0.434993	0.428241	0.415107	0.28002	0.314991	0.271353	0.377745	0.269895	0.502275	0.526431	0.44467	0.471593	0.489101	0.276172	0.416002	0.279515	0.321151	0.320803	0.370725	0.41094	0.407943	0.343417	0.34545	0.393686	0.402066	0.405394	0.402702	0.400329	0.395805	0.384424	0.330129	0.302679
D2hgdh	0.0593475	0.0513653	0.0557466	0.0471743	0.0582117	0.114025	0.0869387	0.101048	0.072064	0.10851	0.10949	0.110118	0.130398	0.0812507	0.110654	0.0809851	0.10864	0.0775089	0.0602331	0.067257	0.0421921	0.0555739	0.0620968	0.0672815	0.0673566	0.0742195	0.0794772	0.0782813	0.0810359	0.0784327	0.217126	0.154992	0.190066	0.0278668	0.0513981	0.0441081	0.047971	0.054988	0.0603172	0.091795	0.0538383	0.0595832	0.0590231	0.0667647	0.0360414	0.0463317	0.0594917	0.0476859	0.0377658
Gal3st2	0	0	0.000638739	0	0.000396171	0.00204434	0	0	0	0	0	0.00184459	0	0	0	0	0	0	0	0	0.00535384	0	0	0.00520331	0.00192725	0.000858459	0	0	0	0	0	0	0.00683085	0	0	0	0	0	0	0	0.00105263	0	0	0	0.000989766	0.00091176	0.00104762	0	0
Gal3st2b	0	0.00119893	0	0	0	0	0	0	0	0.000714898	0	0	0	0	0	0	0	0	0	0	0.0020191	0	0	0	0	0	0	0	0	0	0	0	0	0	0	0	0	0	0	0	0	0	0	0	0	0	0	0	0
Gal3st2c	0	0	0	0.00120523	0	0	0	0.00151149	0.00266599	0.00126908	0.000580504	0	0	0	0	0	0	0.00155211	0.00420252	0.000869864	0	0	0	0	0	0	0	0.0012118	0	0.000378647	0	0	0	0.0245441	0	0	0	0	0	0	0	0	0	0	0.00232166	0	0	0	0
Neu4	0	0	0	0	0	0	0	0	0	0	0	0	0	0	0	0	0	0	0	0	0	0	0	0	0	0	0	0	0	0	0	0	0	0	0	0	0	0	0	0	0	0	0	0	0	0	0	0	0
Pdcd1	0	0	0	0	0	0	0	0	0.00165267	0	0	0	0	0	0	0	0	0.00608138	0.00354746	0.000865765	0	0	0	0.0063672	0	0	0.000732773	0.00182591	0	0	0	0	0	0	0	0	0	0	0	0	0	0	0	0	0	0	0	0	0
4930440C22Rik	0	0	0	0	0	0	0	0	0	0	0	0	0	0	0	0	0	0	0	0	0	0	0	0	0	0	0	0	0	0	0	0	0	0	0	0	0	0	0	0	0	0	0	0	0	0	0	0	0
Fam174a	0.382373	0.158974	0.176167	0.286347	0.317458	0.425221	0.209141	0.229071	0.37724	0.467559	0.373327	0.252395	0.283025	0.332724	0.481723	0.621649	0.249573	0.240231	0.39991	0.457384	0.351828	0.167915	0.104565	0.244601	0.333294	0.367073	0.241155	0.223605	0.355727	0.366006	0.215935	0.143504	0.185146	0.150717	0.277621	0.320403	0.219592	0.214354	0.328068	0.424995	0.285574	0.180032	0.174088	0.250407	0.287101	0.331289	0.195283	0.195832	0.286086
St8sia4	0.00136742	0	0	0	0.000919686	0	0	0.00125905	0	0.00645493	0.00148531	0	0.0034978	0.00204206	0.00262061	0	0	0.00155317	0.000873307	0.00531456	0	0	0	0	0.00313475	0.00582915	0.00189061	0.000629372	0.0100219	0.000914707	0.00497228	0.027564	0.00905702	0	0.010612	0.00146529	0	0	0	0	0	0	0	0	0.00116826	0.001547	0.00196758	0	0.00229295
4930598F16Rik	0	0	0	0	0	0	0	0	0	0	0	0	0	0	0	0	0	0	0	0	0	0	0	0	0	0	0	0	0	0	0	0	0	0	0	0	0	0	0	0	0	0	0	0	0	0	0	0	0
1700063A18Rik	0	0	0	0	0	0	0	0	0	0	0	0	0	0	0	0	0	0	0	0	0	0	0	0	0	0	0	0	0	0	0	0	0	0	0	0	0	0	0	0	0	0	0	0	0	0	0	0	0
Gm29601	0	0	0	0	0	0	0	0	0	0	0	0	0	0	0	0	0	0	0	0	0	0	0	0	0	0	0	0	0	0	0	0	0	0	0	0	0	0	0	0	0	0	0	0	0	0	0	0	0
4930533P14Rik	0	0	0	0	0	0	0	0	0	0	0	0	0	0	0	0	0	0	0	0	0	0	0	0	0	0	0	0	0	0	0	0	0	0	0	0	0	0	0	0	0	0	0	0	0	0	0	0	0
Slco4c1	0	0	0	0	0	0	0	0.000253396	0	0.000764701	0	0	0	0	0	0	0	0	0.000698637	0	0	0	0	0	0	0	0	0	0	0	0	0	0	0	0	0	0	0	0	0	0	0.000540421	0	0	0	0	0	0	0
Panct2	0	0	0	0	0	0	0	0.000684281	0	0	0.000681567	0	0	0	0	0	0	0.000822969	0	0.00124225	0	0	0	0	0	0.000731373	0	0	0	0	0	0	0	0	0	0	0	0	0	0	0	0	0	0	0	0	0	0	0
Gm28901	0	0	0.00214106	0	0	0	0	0	0	0	0	0	0	0.00269282	0	0	0	0	0.00132121	0.00129726	0	0	0	0	0	0.000749605	0.000830505	0.000704218	0	0.000684526	0	0	0.00561056	0	0	0	0	0	0	0	0.000695382	0.00115666	0	0.00109746	0	0	0	0	0
Slco6c1	0	0	0	0	0	0	0	0	0	0	0	0	0	0	0	0	0	0	0	0	0	0	0	0	0	0	0	0	0	0	0	0	0	0	0	0	0	0	0	0	0	0	0	0	0	0	0	0	0
D1Ertd622e	0.102488	0.0739079	0.0831129	0.105467	0.0996927	0.502584	0.295706	0.341142	0.306193	0.263336	0.174	0.154039	0.164889	0.139913	0.109596	0.338286	0.254735	0.312922	0.290691	0.294352	0.0814675	0.0408082	0.0335803	0.04454	0.0815336	0.240036	0.228447	0.197688	0.226125	0.176923	0.383099	0.380252	0.403843	0.432799	0.138476	0.124868	0.0996067	0.113907	0.162504	0.0783935	0.022049	0.0357481	0.0248023	0.0420772	0.0300525	0.0501073	0.072509	0.103905	0.0520337
Ppip5k2	0.1285	0.145984	0.0871753	0.137192	0.0924567	0.311641	0.318348	0.267243	0.26915	0.259086	0.527087	0.511758	0.364972	0.562798	0.464647	0.454644	0.26214	0.271937	0.301261	0.285293	0.209813	0.165754	0.0923151	0.173059	0.116874	0.497103	0.2939	0.214528	0.326937	0.286823	0.72865	0.740438	0.33741	0.475996	0.366877	0.194657	0.262301	0.179489	0.251464	0.194272	0.1572	0.0924354	0.104958	0.15999	0.135134	0.167835	0.135308	0.0698315	0.146791
Gin1	0.141104	0.0959546	0.112552	0.131312	0.152448	0.212739	0.152925	0.113793	0.151571	0.194192	0.240594	0.167756	0.176749	0.225214	0.276697	0.17669	0.135223	0.120907	0.199911	0.171294	0.164342	0.0952356	0.148379	0.209975	0.166037	0.19342	0.151263	0.152406	0.174719	0.205667	0.298334	0.162109	0.201877	0.315748	0.32332	0.140427	0.0991009	0.139176	0.128124	0.149242	0.141195	0.0971005	0.109455	0.140057	0.164227	0.119708	0.0682037	0.0700433	0.0812138
Pam	1.48579	1.17858	0.889825	0.797314	0.644037	0.361755	0.36742	0.405968	0.310905	0.286374	0.533326	0.743728	0.882444	0.791766	0.488125	0.887642	0.743935	0.444128	0.453946	0.356483	1.10968	0.97328	0.675678	0.808684	0.660949	0.449132	0.46094	0.449795	0.293097	0.268825	0.591787	0.765012	0.519166	0.32827	0.36215	2.09737	2.01208	2.071	1.88623	1.66636	0.798354	0.520357	0.440578	0.544576	0.393172	1.52982	1.24259	1.16278	1.03909
1810006J02Rik	0	0	0	0	0	0	0	0	0	0	0	0	0	0	0	0	0	0	0	0	0	0	0	0	0	0	0	0	0	0	0	0	0	0	0	0	0	0	0	0	0	0	0	0	0	0.00109598	0.00327834	0	0
Gm29461	0	0	0	0	0	0	0	0	0	0	0	0	0	0	0	0	0	0	0	0	0	0	0	0	0	0	0	0	0	0	0	0	0	0	0	0	0	0	0	0	0	0	0	0	0	0	0	0	0
Slco6d1	0	0	0	0	0	0	0	0	0	0	0	0	0	0	0	0	0	0	0	0	0	0	0	0	0	0	0	0	0	0	0	0	0	0	0	0	0	0	0	0	0	0	0	0	0	0	0	0	0
Gm7967	0	0	0	0	0	0	0.00219116	0.00196393	0	0.00311303	0.00128318	0	0	0	0.00105463	0	0	0.00254383	0.00106083	0.00203611	0	0	0	0	0	0.0012416	0.00217984	0.00257148	0.00236654	0.00167955	0	0	0	0	0.015278	0	0	0.0134975	0	0	0	0	0	0	0	0	0	0.00318103	0
Cntnap5b	0	0	0	0	0	0	0	0	0	0	0	0	0	0	0	0	0	0.00037898	0	0	0	0	0	0	0	0	0	0	0.000826687	0	0	0	0	0	0	0	0	0	0	0	0	0	0	0	0	0	0	0	0
Gm20268	0	0	0	0	0	0	0	0	0	0	0	0	0	0	0	0	0	0	0	0	0	0	0	0	0	0	0	0	0	0	0	0	0	0	0	0	0	0	0	0	0	0	0	0	0	0	0	0	0
Gm28187	0	0.00255883	0.00792466	0.0170513	0.0105452	0.0378288	0.0183373	0.0209028	0.041262	0.0539811	0.0190636	0.0163889	0.0211741	0.0222751	0.0266343	0.00921098	0.049655	0.0215916	0.0518365	0.0409802	0.00201533	0.00386842	0.0131813	0.0378445	0.0206499	0.0240296	0.0228453	0.0199729	0.0231008	0.0227079	0.0739484	0.0693263	0.0367099	0.113101	0.033537	0	0	0	0	0.00164918	0.000492166	0.00214472	0.00065807	0.0117436	0.00966933	0.000407548	0.00242094	0	0.00528979
Cdh20	0	0	0	0	0	0.00146012	0	0	0	0	0	0	0	0	0	0	0	0	0	0	0	0	0	0	0	0	0	0.000863937	0	0	0	0	0	0	0	0	0	0	0	0	0	0	0	0	0	0	0	0	0
Gm15699	0	0	0	0	0	0	0	0	0	0	0	0	0	0	0	0	0	0	0	0	0	0	0	0	0	0	0	0	0	0	0	0	0	0	0	0	0	0	0	0	0	0	0	0	0	0	0	0	0
Gm29012	0	0	0	0	0	0	0	0	0	0	0	0	0	0	0	0	0	0	0	0	0	0	0	0	0	0	0	0	0	0	0	0	0	0	0	0	0	0	0	0	0	0	0	0	0	0	0	0	0
Rnf152	0.0128758	0.00117706	0.00569929	0	0.00371548	0	0.00383194	0.0139973	0.0101647	0.00345275	0.0152024	0.0212943	0.0169159	0.0190068	0.00735319	0.0103002	0.0065311	0.0153247	0.0173678	0.0105953	0.00186966	0.00909621	0.00644257	0.00166848	0.00423681	0.0131145	0.00434804	0.00771741	0.00366475	0.00159549	0.0149741	0	0.0174786	0	0.0059058	0.0359963	0.0320419	0.0358932	0.0250239	0.0155911	0.00432315	0.00360931	0.00960484	0.0019271	0.00153524	0.00966935	0.00544862	0.00235323	0.0167599
Gm17634	0	0	0	0	0	0	0	0	0	0	0.00120429	0	0	0	0.00158157	0	0	0.00123134	0	0	0	0	0	0	0	0	0	0	0	0.000706213	0	0	0	0	0.0169545	0	0	0	0	0	0	0	0	0	0	0.00140442	0	0	0
Pign	0.104376	0.0769229	0.109303	0.0977375	0.0600517	0.152759	0.113648	0.114274	0.142303	0.149054	0.164482	0.155296	0.172317	0.188021	0.219555	0.172542	0.149342	0.119571	0.166229	0.174204	0.139317	0.0893374	0.112945	0.177842	0.105167	0.128716	0.10863	0.106712	0.0981816	0.115955	0.288559	0.34634	0.246398	0.19366	0.260686	0.133948	0.0689811	0.0899761	0.154043	0.125412	0.0914833	0.0807696	0.0760299	0.117632	0.0959255	0.130607	0.0735087	0.0562207	0.106596
2310035C23Rik	0.256592	0.159917	0.209389	0.191536	0.219349	0.219691	0.153345	0.190147	0.241571	0.26399	0.269732	0.240653	0.232806	0.226605	0.239888	0.218496	0.228311	0.198759	0.25702	0.231928	0.184872	0.204358	0.203668	0.300674	0.265093	0.196513	0.165641	0.152827	0.182719	0.218907	0.426067	0.448855	0.35713	0.59414	0.506847	0.189395	0.166167	0.154337	0.206356	0.230558	0.198318	0.125045	0.166074	0.168695	0.240965	0.202241	0.129142	0.147569	0.207184
Tnfrsf11a	0.0190111	0.0243361	0.00617621	0.011747	0.00506278	0	0	0	0	0	0	0	0	0	0	0	0	0.000626671	0.000578484	0	0	0	0	0	0	0	0	0.000517554	0	0.00069441	0	0	0	0	0	0	0	0	0	0	0.000907645	0	0	0	0	0	0	0	0
Gm7160	0.0143084	0.00756096	0.00397198	0.0154821	0.00564729	0.00891837	0.00342211	0.00492848	0.00608923	0.00942374	0.00294078	0.00298786	0	0.00158781	0.00210249	0.0414331	0	0.00622422	0.00412251	0.00488262	0.00789171	0.00654648	0.0107803	0.0198356	0.0186144	0.00271993	0.00266375	0.00174803	0.00159906	0.00334135	0.00467753	0	0.00641578	0	0	0.0212373	0.00863327	0	0.00587721	0.00436213	0.0108719	0	0.00852987	0.00964586	0.00944432	0.0115111	0.00561593	0	0.0147892
Zcchc2	0.0915255	0.0988191	0.123637	0.0902846	0.0864928	0.0844962	0.10862	0.10026	0.138112	0.114579	0.0759481	0.082358	0.115598	0.0657426	0.0922307	0.119716	0.077539	0.0965464	0.0968046	0.130507	0.0773128	0.122162	0.0609201	0.158925	0.133812	0.0780794	0.118273	0.0925877	0.0913968	0.112205	0.118358	0.251399	0.0952464	0.0760769	0.166382	0.0880059	0.138912	0.0986311	0.115113	0.0833488	0.0913748	0.086855	0.0922337	0.0918914	0.0820745	0.0977708	0.0865659	0.128663	0.112993
Gm20753	0	0	0	0.00117639	0.00239336	0	0	0.000840792	0.000826337	0	0	0	0	0	0	0	0	0	0	0.000277498	0	0	0	0	0	0	0	0	0	0	0	0	0	0	0	0	0	0	0	0	0	0	0	0	0.00118795	0	0	0	0
Phlpp1	0.179775	0.202461	0.175247	0.173902	0.191964	0.158342	0.119355	0.0914692	0.0934682	0.12809	0.134651	0.185792	0.166357	0.180105	0.15106	0.155423	0.14981	0.0860037	0.094002	0.085321	0.166059	0.140825	0.20537	0.190123	0.175786	0.149384	0.167028	0.113372	0.114179	0.138614	0.172185	0.307848	0.144326	0.117721	0.194237	0.24652	0.235554	0.224744	0.155076	0.225854	0.127156	0.0898503	0.119562	0.113044	0.131425	0.178043	0.207103	0.24098	0.251547
A530053M12Rik	0	0	0	0.00149978	0	0	0	0	0	0	0	0	0	0	0	0	0	0	0	0	0	0	0	0	0.000671303	0	0	0	0	0	0	0	0.00475203	0	0	0	0	0	0	0	0	0.00106187	0	0	0	0	0	0	0
Bcl2	0.599129	0.687932	0.416022	0.473199	0.353123	0.556055	0.280695	0.10117	0.0998075	0.15701	1.10673	1.36122	0.766157	0.854452	1.13937	0.959956	0.521228	0.244463	0.18564	0.193362	0.482242	0.659542	0.48305	0.470677	0.445975	0.721399	0.497986	0.166788	0.23368	0.232602	1.81028	1.72587	0.519908	0.508151	0.615245	0.794536	0.689785	0.588599	0.776471	0.762804	0.44212	0.478033	0.430043	0.42995	0.344212	0.47947	0.489291	0.396911	0.291845
D630008O14Rik	0	0.00174241	0.00126718	0.00307213	0	0	0	0	0	0.000737246	0.00105404	0.00296547	0	0	0.00276652	0	0	0	0	0	0	0	0	0	0	0.00168474	0	0	0	0	0	0.0103077	0	0	0.00267385	0	0.00509642	0	0	0	0.00167646	0.00287928	0.00156069	0	0	0	0	0	0
Kdsr	0.236552	0.203845	0.187049	0.282546	0.236922	0.319873	0.302759	0.341208	0.384071	0.423386	0.314765	0.250273	0.307245	0.407686	0.396554	0.339152	0.239897	0.273034	0.353322	0.37763	0.319871	0.231884	0.256218	0.368798	0.254143	0.300798	0.270796	0.305249	0.323293	0.31109	0.402458	0.421695	0.500431	0.324795	0.468556	0.264873	0.230274	0.223632	0.236935	0.352407	0.291532	0.204269	0.208527	0.281806	0.240064	0.253859	0.227569	0.226942	0.280373
Vps4b	0.544504	0.584843	0.499168	0.476619	0.558539	0.761531	0.774838	0.7279	0.754596	0.819641	0.962112	1.00437	0.929908	0.875672	0.900095	0.881844	0.795364	0.769618	0.767398	0.872857	0.456804	0.495455	0.557948	0.584635	0.576129	0.805136	0.84526	0.645411	0.626599	0.714773	0.793124	0.896252	0.723235	0.306615	0.645868	0.547269	0.555592	0.474075	0.425823	0.515358	0.555734	0.557732	0.656656	0.528711	0.58009	0.477356	0.461118	0.501505	0.518827
Serpinb5	0	0	0	0	0	0	0	0	0	0	0	0	0	0	0	0	0	0	0	0	0	0	0	0	0	0	0	0	0	0	0	0	0	0	0	0	0	0	0	0	0	0	0	0	0	0	0	0	0
Serpinb12	0	0	0	0	0	0	0	0	0	0	0	0	0	0	0	0	0	0	0	0	0	0	0	0	0	0	0	0	0	0	0	0	0	0	0	0	0	0	0	0	0	0	0	0	0	0	0	0	0
Serpinb13	0	0	0	0	0	0	0	0	0	0	0	0	0	0	0	0	0	0	0	0	0	0	0	0	0	0	0	0	0	0	0	0	0	0	0	0	0	0	0	0	0	0	0	0	0	0	0	0	0
Serpinb3a	0	0	0	0	0	0	0	0	0	0	0	0	0	0	0	0	0	0	0	0	0	0	0	0	0	0	0	0	0	0	0	0	0	0	0	0	0	0	0	0	0	0	0	0	0	0	0	0	0
Serpinb3d	0	0	0	0	0	0	0	0	0	0	0	0	0	0	0	0	0	0	0	0	0	0	0	0	0	0	0	0	0	0	0	0	0	0	0	0	0	0	0	0	0	0	0	0	0	0	0	0	0
Serpinb3b	0	0	0	0	0	0	0	0	0	0	0	0	0	0	0	0	0	0	0	0	0	0	0	0	0	0	0	0	0	0	0	0	0	0	0	0	0	0	0	0	0	0	0	0	0	0	0	0	0
Serpinb3c	0	0	0	0	0	0	0	0	0	0	0	0	0	0	0	0	0	0	0	0	0	0	0	0	0	0	0	0	0	0	0	0	0	0	0	0	0	0	0	0	0	0	0	0	0	0	0	0	0
Serpinb11	0	0	0	0	0	0	0	0	0	0.000495148	0	0	0	0	0	0	0	0	0	0	0	0	0	0	0	0	0	0	0.00113761	0	0	0	0	0	0	0	0	0	0	0	0	0	0	0	0	0	0	0	0
Gm15391	0	0	0	0	0	0	0	0	0	0	0	0	0	0	0	0	0	0	0	0	0	0	0	0	0	0	0	0	0	0	0	0	0	0	0	0	0	0	0	0	0	0	0	0	0	0	0	0	0
Serpinb7	0	0	0	0	0	0	0	0	0	0	0	0	0	0	0	0	0	0	0	0	0	0	0	0	0	0	0	0	0	0	0	0	0	0	0	0	0	0	0	0	0	0	0	0	0	0	0	0	0
Serpinb2	0	0	0	0	0	0	0	0	0	0	0	0	0	0	0	0	0	0	0	0	0	0	0	0	0	0	0	0	0	0	0	0	0	0	0	0	0	0	0	0	0	0	0	0	0	0	0	0	0
Serpinb8	0	0	0.00119194	0.000652035	0.00116299	0	0.00130317	0.00182057	0.00158805	0	0.00278386	0.0108981	0.00938436	0	0	0	0	0.00409159	0.00358286	0.000893436	0	0	0.00315362	0	0.00328661	0	0.00276618	0	0.00165027	0.0006774	0	0.00620007	0	0	0.00739026	0	0	0	0	0	0	0	0.00260615	0	0	0	0	0	0
Gm15389	0	0	0	0	0	0	0	0	0	0	0	0	0	0	0	0	0	0	0	0	0	0	0	0	0	0	0	0	0	0	0	0	0	0	0	0	0	0	0	0	0.000679569	0	0	0	0	0	0	0	0
D830032E09Rik	0	0	0	0	0	0	0	0	0	0	0	0	0	0	0	0	0	0	0	0	0	0	0	0	0	0	0	0	0	0	0	0	0	0	0	0	0	0	0	0	0	0	0	0	0	0	0	0	0
Cdh7	0	0	0	0	0	0	0	0	0	0.00048572	0.00625673	0	0	0.00376591	0.00134418	0	0	0	0	0.000606629	0	0	0	0	0	0.00222878	0	0	0	0	0.0217737	0	0	0	0	0	0	0	0	0	0	0	0	0	0	0	0	0	0
Cdh19	0	0	0	0	0	0	0	0	0	0	0	0	0	0	0	0	0	0	0	0	0	0	0	0	0	0	0	0	0.00170675	0	0	0	0	0	0	0	0	0	0	0	0	0	0	0	0.00353884	0	0	0	0
Gm29088	0	0	0	0	0	0	0	0	0	0	0.000622069	0	0	0	0	0	0	0	0	0.000471651	0	0	0	0	0.000479215	0.000866102	0	0	0	0	0	0	0	0	0	0	0	0	0	0	0	0	0	0	0	0	0	0	0
Dsel	0.453505	0.350251	0.289671	0.428673	0.37064	0.333295	0.40731	0.275927	0.344486	0.362666	0.22101	0.294842	0.325721	0.268033	0.281146	0.255019	0.320565	0.20632	0.242837	0.196445	0.49235	0.428643	0.381637	0.532156	0.497065	0.258164	0.315879	0.265911	0.27099	0.265206	0.408213	0.646845	0.407577	0.358907	0.444882	0.340819	0.40853	0.350296	0.464807	0.366081	0.335471	0.282784	0.274323	0.24612	0.288402	0.414007	0.431175	0.362798	0.494272
Gm28189	0	0	0	0	0	0	0	0	0	0	0	0	0	0	0	0	0	0	0	0	0	0	0	0	0	0	0	0	0	0	0	0	0	0	0	0	0	0	0	0	0	0	0	0	0	0	0	0	0
9330185C12Rik	0	0.000659757	0	0	0	0	0.00121854	0.000390441	0	0	0.00488086	0.00370196	0	0	0.00412236	0	0	0	0	0	0	0	0	0	0	0.000724725	0	0	0	0.00313308	0.0118574	0	0	0	0	0	0	0	0	0	0	0	0	0	0	0	0	0	0
Cntnap5a	0.00574987	0.00421351	0	0.000566063	0	0.0932375	0.00692892	0.00690303	0	0	0.208582	0.0991243	0.101066	0.0455443	0.041289	0.261373	0.0472137	0.00195928	0.00110463	0.00123521	0.00410475	0.00249026	0	0	0	0.123948	0.0182475	0.0117677	0.00518067	0.0052683	0.301001	0.083264	0.0350037	0.0370074	0	0	0.00465617	0	0	0	0.00411447	0	0	0	0	0.00283125	0.00198096	0	0
Gm19965	0	0	0	0	0	0	0	0	0	0	0	0	0	0	0	0	0	0	0	0	0	0	0	0	0	0	0	0	0	0	0	0	0	0	0	0	0	0	0	0	0	0	0	0	0	0	0	0	0
Zfp813-ps	0	0	0	0	0	0	0	0	0	0	0	0	0	0	0	0	0	0	0	0	0	0	0	0	0	0	0	0	0	0	0	0	0	0	0	0	0	0	0	0	0	0	0	0	0	0	0	0	0
Gm28363	0	0	0	0	0	0	0	0	0	0	0	0	0	0	0	0	0	0	0	0	0	0	0	0	0	0	0	0	0	0	0	0	0	0	0	0	0	0	0	0	0	0	0	0	0	0	0	0	0
B020011L13Rik	0	0	0	0	0	0	0	0	0	0	0	0	0	0	0	0	0	0	0	0	0	0	0	0	0	0	0	0	0	0	0	0	0	0	0	0	0	0	0	0	0	0	0	0	0	0	0	0	0
Gm28360	0	0	0	0	0	0	0	0	0	0	0	0	0	0	0	0	0	0	0	0	0	0	0	0	0	0	0	0	0	0	0	0	0	0	0	0	0	0	0	0	0	0	0	0	0	0	0	0	0
Gm28168	0	0	0	0	0	0	0	0	0	0	0	0	0	0	0	0	0	0	0	0	0	0	0	0	0	0	0	0	0	0	0	0	0	0	0	0	0	0	0	0	0	0	0	0	0	0	0	0	0
Gm7145	0	0	0	0	0	0	0	0	0	0	0	0	0	0	0	0	0	0	0	0	0	0	0	0	0	0	0	0	0	0	0	0	0	0	0	0	0	0	0	0	0	0	0	0	0	0	0	0	0
Gm29106	0	0	0	0	0	0	0	0	0.000895523	0	0	0	0	0	0	0	0	0	0	0	0	0	0	0	0	0	0	0	0	0	0	0	0	0	0	0	0	0	0	0	0	0	0	0	0	0	0	0	0
Tsn	1.26289	1.30479	1.30912	1.08966	1.45693	1.60019	1.98867	1.86068	1.62598	1.78681	1.88519	2.06798	1.97034	1.67765	2.02912	1.56227	1.48424	1.71682	1.54537	1.82286	1.3744	1.43693	1.3132	1.21258	1.57276	1.99506	2.3495	2.18463	1.9482	2.2056	0.833319	1.0276	1.12792	0.700274	0.970256	1.25973	1.50842	1.29039	1.20733	1.63526	1.47532	1.63138	1.62602	1.29288	1.62718	1.30375	1.36923	1.148	1.16506
Nifk	0.342353	0.375101	0.350267	0.229409	0.35546	0.594518	0.71966	0.757273	0.592097	0.661653	0.798638	0.905547	0.852854	0.729723	0.883263	0.532734	0.510794	0.599282	0.460299	0.619255	0.351343	0.340179	0.353499	0.189682	0.397747	0.762831	0.990084	1.0603	0.722689	0.927551	0.276026	0.37592	0.384683	0.297714	0.24485	0.391183	0.468625	0.360965	0.19377	0.480631	0.621904	0.612243	0.755701	0.550669	0.683801	0.418557	0.419588	0.296232	0.229211
Gm28867	0	0	0	0	0	0	0	0.000884721	0	0	0	0	0	0	0	0	0	0	0	0	0	0	0	0	0	0	0	0	0.00136177	0	0	0	0	0	0	0	0	0	0	0	0	0	0	0	0	0	0	0	0
Clasp1	0.317725	0.373314	0.404931	0.36108	0.318774	0.394529	0.398175	0.355143	0.429949	0.395562	0.425319	0.49765	0.459375	0.479904	0.488686	0.612908	0.411607	0.502727	0.512698	0.480733	0.354133	0.321023	0.407393	0.446341	0.330834	0.449362	0.359142	0.377788	0.362625	0.333385	0.736706	0.944086	0.90139	0.586509	0.485603	0.388006	0.370631	0.404736	0.425975	0.38415	0.321853	0.320016	0.291801	0.40851	0.269349	0.329654	0.336636	0.370403	0.357431
2900060B14Rik	0.0824113	0.125051	0.0901759	0.108693	0.126947	0.0812053	0.0727818	0.0495697	0.0613557	0.0555213	0.041885	0.0449323	0.067217	0.0631936	0.0782551	0.0972881	0.0451727	0.0585969	0.0796606	0.107825	0.088996	0.160559	0.126136	0.17931	0.144758	0.0372274	0.0595911	0.0569598	0.0721341	0.0680929	0.0883206	0.178469	0.163154	0.0939771	0.209498	0.126266	0.177612	0.12567	0.205822	0.241071	0.0570432	0.0789515	0.0684605	0.0776134	0.0905448	0.0625287	0.10617	0.0673619	0.110609
Tfcp2l1	0.00941111	0.00293594	0.0108233	0.00116368	0.000489345	0.0422143	0.0261903	0.0217357	0.0137664	0.0236136	0.0318437	0.0393568	0.0244467	0.0331385	0.0483299	0.132562	0.0381602	0.0186125	0.0292897	0.0306269	0.00360708	0.00283362	0	0	0.00317588	0.0373754	0.0294057	0.0184349	0.0279859	0.0288372	0.0383109	0.0177242	0.00875134	0.0331695	0.00509506	0.00761411	0.00284309	0.0051821	0.00397597	0.00634399	0.00269936	0.00166639	0.00169613	0.0019271	0	0.00298302	0.00454677	0	0
Gli2	0.19283	0.155382	0.169421	0.170383	0.176161	0.0221708	0.0109381	0.0112488	0.0142933	0.0135859	0.0664212	0.0177319	0.0181724	0.0370015	0.0335327	0	0.0171461	0.0162812	0.0106689	0.00869194	0.15303	0.125568	0.151332	0.13418	0.140447	0.0597825	0.0193382	0.0238245	0.0478899	0.0309369	0.0938533	0.00464593	0.0439661	0.0929594	0.00487503	0.199046	0.157472	0.125683	0.232687	0.168423	0.181987	0.133641	0.146537	0.225205	0.214073	0.210297	0.191805	0.222768	0.178122
Gm26831	0.00428867	0.00140087	0.00308732	0	0.0053628	0.00179146	0	0	0	0	0	0	0	0	0	0	0	0	0	0	0.00234086	0	0	0.00399878	0.000865928	0.000985675	0	0	0	0.000906531	0	0	0	0	0	0.00370604	0	0	0.00988158	0.00323302	0.00162843	0.00449389	0.00123353	0.00253542	0.00534586	0	0	0.0123223	0
Gm29456	0	0	0	0	0	0	0	0	0	0.000520562	0	0	0	0	0	0	0	0	0	0	0	0	0	0	0	0	0	0.000867879	0.00124748	0	0	0	0	0	0	0	0	0	0	0	0	0	0	0	0	0	0	0	0
Gm29455	0	0	0	0	0	0	0.000860802	0	0	0	0	0	0	0	0	0	0	0	0	0	0	0	0	0	0	0	0.00105176	0	0	0	0	0	0	0	0	0	0	0	0	0	0	0	0	0	0	0	0	0	0
Inhbb	0.061627	0.145525	0.0901192	0.0382588	0.0941602	2.83914	5.32094	0.730898	3.32036	4.53275	1.65035	1.02702	0.808352	0.453456	0.60178	0.62436	0.288235	0.0951034	0.0774036	0.208933	0.0306268	0.144717	0.0531603	0.0225034	0.116009	1.9379	3.51568	2.84468	2.75294	5.08087	2.96615	2.79291	1.33918	0.59847	2.69469	0.0463425	0.13305	0.0692216	0.00986123	0.156721	0.0488232	0.0691169	0.0304496	0.0156125	0.0556511	0.0253415	0.11077	0.0647355	0.025634
Ralb	0.244926	0.172962	0.227908	0.341246	0.245486	0.23954	0.306503	0.171899	0.440845	0.43147	0.417364	0.264229	0.339286	0.414499	0.371778	0.206305	0.25264	0.233228	0.393804	0.343183	0.278116	0.206905	0.252505	0.35075	0.325338	0.39811	0.279972	0.258975	0.373155	0.396969	0.327457	0.169914	0.12977	0.141735	0.185046	0.303134	0.193631	0.195243	0.371913	0.241466	0.379718	0.241481	0.292977	0.497429	0.34669	0.265687	0.234152	0.204795	0.383237
Gm27184	0.0015934	0.00164058	0.00259498	0.00238882	0.00344717	0.00219761	0.00768206	0.00186302	0.00272161	0.00821594	0.00537864	0.000757188	0.00209055	0.00571983	0	0.0136016	0.0105532	0	0.0033593	0.000757503	0.00407667	0	0.00659604	0.00186601	0.000765326	0.00483017	0	0.00194964	0.00170062	0.00884322	0.0124274	0.00682547	0	0	0	0.00167317	0.00413269	0.0035071	0	0	0.00293619	0.00647585	0	0.00332533	0.00358492	0.00454212	0.00280986	0	0.00400513
Tmem185b	0.103845	0.0732607	0.055868	0.0570874	0.0945287	0.143854	0.0585556	0.0731696	0.108784	0.152387	0.162508	0.0724857	0.0715589	0.113902	0.142401	0.219541	0.0962627	0.04528	0.0696329	0.0922152	0.094742	0.0226118	0.0301792	0.0916029	0.136677	0.144662	0.0778731	0.0794973	0.121528	0.135226	0.146381	0.144165	0.093794	0.121659	0.0722581	0.0890842	0.0462277	0.0491529	0.0854026	0.0781916	0.135613	0.0678154	0.0827627	0.0750955	0.141696	0.0807216	0.0418176	0.0616744	0.0668454
3830432H09Rik	0	0	0	0.00140663	0.00116082	0.00644374	0	0	0	0.00210662	0	0.00244911	0.00195229	0.00478951	0.000912962	0	0	0.00204742	0.000750242	0.000514744	0.00290717	0	0.00305303	0	0	0.00066891	0.000705462	0.00259495	0.00460199	0.00156408	0.0115032	0.0121131	0	0	0	0	0.00209166	0	0	0	0.000929842	0	0	0	0	0	0.00474546	0	0
Epb41l5	0.143158	0.176978	0.110986	0.0983026	0.0894385	0.384122	0.40633	0.352052	0.339295	0.417849	0.597514	0.622818	0.601741	0.68966	0.500615	0.615563	0.533138	0.326036	0.338362	0.333666	0.150082	0.150705	0.118635	0.149765	0.117313	0.543617	0.46848	0.437126	0.399147	0.487716	0.803489	0.765549	0.605696	0.463984	0.4891	0.255311	0.247426	0.257048	0.1912	0.205723	0.0928559	0.0742963	0.133553	0.0871577	0.0868627	0.185029	0.142319	0.161667	0.103495
Ptpn4	0.119377	0.0850755	0.0763291	0.114363	0.110734	0.205731	0.224625	0.19121	0.22795	0.251494	0.216152	0.268555	0.231326	0.299682	0.237368	0.225958	0.224884	0.147261	0.199189	0.202114	0.0735001	0.121808	0.0757203	0.0902697	0.0771818	0.212195	0.208005	0.176978	0.203874	0.228851	0.377373	0.532205	0.195938	0.180115	0.271955	0.136901	0.0866194	0.0779908	0.155941	0.122468	0.0926003	0.0871643	0.0735258	0.110628	0.0963396	0.119671	0.0889798	0.0592474	0.128923
Gm28209	0	0	0	0	0	0	0	0	0	0	0	0	0	0	0	0	0	0	0	0	0	0	0	0	0	0	0	0	0	0	0	0	0	0	0	0	0	0	0	0	0	0	0	0	0	0	0	0	0
Tmem177	0.0155338	0.0165993	0.0152426	0.0194704	0.0319076	0.0173186	0.0270623	0.0329339	0.0410518	0.051533	0.0280685	0.0290982	0.0220243	0.0326038	0.0713965	0.0106082	0.0297723	0.0321274	0.0338821	0.0485235	0.00195124	0.0164715	0.0200984	0.00564477	0.0142153	0.0452468	0.0493273	0.0516854	0.0302552	0.0732102	0.0307172	0	0.0126193	0	0.0447705	0.00922665	0.0135838	0.00418766	0.0104037	0.067797	0.00628147	0.0109606	0.00528516	0.0129973	0.020892	0.00941868	0.00665808	0.00818422	0.0129357
Cfap221	0	0	0	0	0	0	0	0	0	0.000495368	0	0	0	0	0.0013091	0	0	0	0	0	0	0	0	0	0	0	0.0015243	0.00180127	0	0.000801191	0	0	0	0	0	0	0	0	0	0	0	0	0	0	0	0	0	0	0
Sctr	0	0	0	0	0	0	0	0	0.000798096	0	0	0	0	0	0	0	0	0	0	0.000545771	0	0	0.00538537	0	0	0	0	0	0	0	0	0	0.00572058	0	0	0	0	0	0	0	0	0	0	0	0	0	0.00141851	0	0
Tmem37	0.040116	0.0315533	0.0699518	0.0384327	0.0727176	0.0105843	0.00577957	0.0108211	0.0137874	0.0138985	0.00928459	0.0100016	0.0141464	0.00694336	0.00924815	0	0	0.02109	0.0369533	0.0357812	0.0278027	0.166984	0.212919	0.332868	0.470199	0.0160548	0.0129002	0.011004	0.035876	0.0283777	0.00628422	0.0168846	0.0168572	0	0.0263846	0.109776	0.105459	0.143158	0.191055	0.22396	0.0617942	0.066368	0.100917	0.0901598	0.134434	0.0527448	0.0734074	0.144102	0.163802
Dbi	2.21864	2.23205	2.77579	3.60472	3.67493	2.03469	2.09616	1.34493	1.98308	2.29022	1.58659	1.17356	1.34763	1.35911	1.58446	1.40444	1.33716	1.33424	1.75993	1.9246	2.25544	1.99904	2.16586	2.11715	2.73471	1.91256	2.21275	2.54348	2.41364	2.92778	0.715038	0.763558	0.742389	0.466327	0.97991	1.82174	1.66662	1.78128	1.61813	2.12362	2.99256	2.8897	2.80416	3.18131	3.55014	2.55358	2.7024	2.74524	2.75703
3110009E18Rik	0.077799	0.0330741	0.0358155	0.0627152	0.0907469	0.0840363	0.0640511	0.058485	0.0827265	0.11051	0.0888216	0.0462109	0.0435574	0.056781	0.0861665	0.0908621	0.0641005	0.0394085	0.0776464	0.0773998	0.0594972	0.0251927	0.0220963	0.0488119	0.111981	0.0932372	0.0740584	0.0770692	0.10825	0.128455	0.0633047	0.0080754	0.0259663	0.0223492	0.0316042	0.0524179	0.0329186	0.0527729	0.0208328	0.0558669	0.0827684	0.0471359	0.0527191	0.0749182	0.0994758	0.0705278	0.05707	0.0512315	0.0454409
Steap3	0.45465	0.557782	0.56974	0.633196	0.50644	0.101202	0.184021	0.206754	0.167095	0.107998	0.109793	0.0855738	0.188549	0.130816	0.156008	0.185251	0.240681	0.242357	0.187438	0.178387	0.465262	0.58426	0.455701	0.367843	0.336038	0.134996	0.1884	0.356104	0.321025	0.202949	0.0885366	0.125126	0.197429	0.0500313	0.069273	0.858237	0.858337	0.973211	0.890165	0.85618	0.274014	0.29442	0.254451	0.250784	0.208745	0.540452	0.53166	0.477641	0.397933
C1ql2	0	0	0	0	0.00153871	0	0	0.000673626	0	0	0	0	0	0	0.00147788	0	0	0	0	0	0	0	0	0	0	0	0	0	0	0	0	0	0	0	0	0.00265706	0	0.00341668	0	0.00223884	0.000840776	0	0	0	0	0	0	0	0
1700012E03Rik	0	0	0	0	0	0	0	0	0	0	0	0	0	0	0	0	0	0	0	0	0	0	0	0	0	0	0	0	0	0	0	0	0	0	0	0	0	0	0	0	0	0	0	0	0	0	0	0	0
Marco	0	0	0	0	0	0.000704325	0	0	0	0	0	0	0	0	0	0	0	0	0	0	0	0	0	0	0	0	0	0	0	0	0	0	0	0	0	0	0	0	0	0	0	0	0	0	0	0	0	0	0
En1	0	0	0	0	0	0.0040409	0	0	0	0	0	0	0	0	0	0	0	0	0	0	0	0	0	0	0	0	0	0	0	0	0	0	0	0	0	0	0.00648933	0	0	0	0	0	0	0	0	0	0	0	0
2610027F03Rik	0	0	0	0	0	0	0	0	0	0	0	0	0	0	0	0	0	0	0	0	0	0	0	0	0	0	0	0	0	0	0	0	0	0	0	0	0	0	0	0	0	0	0	0	0	0	0	0	0
Gm29346	0	0	0	0	0	0	0	0	0	0	0	0	0	0	0	0	0	0	0	0	0	0	0	0	0	0	0	0	0	0	0	0	0	0	0	0	0	0	0	0	0	0	0	0	0	0	0	0	0
Gm29345	0	0	0	0	0	0	0	0	0	0	0	0	0	0	0	0	0	0	0	0	0	0	0	0	0	0	0	0	0	0	0	0	0	0	0	0	0	0	0	0	0	0	0	0	0	0	0	0	0
Gm29348	0	0	0	0	0	0	0	0	0	0	0	0	0	0	0	0	0	0	0	0	0	0	0	0	0	0	0	0	0	0	0	0	0	0	0	0	0	0	0	0	0	0	0	0	0	0	0	0	0
Gm29347	0	0	0	0	0	0	0	0	0	0	0	0	0	0	0	0	0	0	0	0	0	0	0	0	0	0	0	0	0	0	0	0	0	0	0	0	0	0	0	0	0	0	0	0	0	0	0	0	0
Celrr	0	0	0	0	0	0	0	0	0	0	0	0	0	0	0	0	0	0	0	0	0	0	0	0	0.00346453	0	0	0	0	0	0	0	0	0	0	0	0	0	0	0	0.00174259	0	0	0	0	0	0	0	0.00179766
Gm29359	0	0	0	0	0	0	0	0	0	0	0	0	0	0	0	0	0	0	0	0	0	0	0	0	0	0	0	0	0	0	0	0	0	0	0	0	0	0	0	0	0	0	0	0	0	0	0	0	0
Insig2	0.338402	0.379061	0.291569	0.356711	0.401621	0.362641	0.278423	0.289851	0.287535	0.377727	0.306316	0.361311	0.323732	0.365617	0.342803	0.40675	0.414625	0.393683	0.3593	0.425612	0.331646	0.28269	0.327585	0.439626	0.502994	0.20546	0.200693	0.189855	0.252513	0.248241	0.29867	0.183568	0.133428	0.417677	0.14922	0.249983	0.30787	0.268558	0.387648	0.472899	0.184768	0.168319	0.227586	0.172411	0.244327	0.28424	0.281483	0.296325	0.450533
2210011K15Rik	0	0	0	0	0	0	0	0	0	0	0	0	0	0	0	0	0	0	0	0	0	0	0	0	0.00100058	0	0	0	0	0	0	0	0	0	0	0	0	0	0	0	0	0	0	0	0	0	0	0	0
Ccdc93	0.11757	0.115644	0.118121	0.129065	0.108349	0.0946564	0.1349	0.132039	0.170836	0.133696	0.0968002	0.126184	0.189247	0.161114	0.14694	0.0599941	0.248535	0.147653	0.130808	0.142654	0.140146	0.158251	0.121445	0.148756	0.127905	0.0943995	0.0983153	0.136439	0.103034	0.113006	0.0487792	0.165712	0.191738	0.0513166	0.0801247	0.119956	0.160113	0.107289	0.133333	0.0995658	0.130266	0.120768	0.120399	0.152894	0.129701	0.0941641	0.153176	0.0847401	0.177857
Gm15392	0	0	0	0	0	0	0	0	0	0	0	0	0	0	0	0	0	0	0	0	0	0	0	0	0	0	0	0	0	0	0	0	0	0	0	0	0	0	0	0	0	0	0	0	0	0	0	0	0
Htr5b	0	0	0	0.0014582	0	0	0.00396017	0.00140513	0	0	0	0	0	0	0	0	0.0213748	0	0	0.000493326	0	0	0	0	0	0	0	0	0	0	0	0	0	0	0	0	0	0	0	0	0	0	0	0.0014153	0	0	0	0	0
Ddx18	0.506649	0.430327	0.382294	0.324617	0.58715	0.737804	0.787735	0.739556	0.769435	0.902835	0.899006	0.88651	0.701942	0.711077	0.973498	0.85886	0.609445	0.663049	0.521916	0.888045	0.543883	0.399305	0.295933	0.414582	0.59449	1.03988	1.03694	0.914497	0.940891	1.10783	0.803481	0.893372	0.722646	0.386007	1.02916	0.57784	0.483805	0.431019	0.536994	0.640243	0.659695	0.611291	0.548576	0.536932	0.779088	0.522474	0.449852	0.402549	0.310569
Gm28590	0	0	0	0	0	0	0	0	0	0	0	0	0	0	0	0	0	0	0	0	0	0	0	0	0	0	0	0	0	0	0	0	0	0	0	0	0	0	0	0	0	0	0	0	0	0	0	0	0
Dpp10	0	0	0	0	0	0.00226668	0.00985782	0.00366563	0.0113319	0.0209435	0.000656493	0.00205333	0.000916756	0	0.000979278	0	0	0.00205819	0.00325355	0.00729196	0	0	0	0	0	0.0012517	0.000648361	0.0014717	0.0015515	0.00126839	0	0	0	0	0.0261288	0	0	0	0	0	0	0	0	0	0	0	0	0	0
Gm28928	0	0	0	0	0	0	0	0	0	0	0	0	0	0	0	0	0	0	0	0	0	0	0	0	0	0	0	0	0	0	0	0	0	0	0	0	0	0	0	0	0	0	0	0	0	0	0	0	0
1700121L03Rik	0	0	0	0	0	0	0	0	0	0	0	0	0	0	0	0	0	0	0	0	0	0	0	0	0	0	0	0	0	0	0	0	0	0	0	0	0	0	0	0	0	0	0	0	0	0	0	0	0
Actr3	2.13948	1.45698	1.26522	1.53961	1.40393	1.07705	0.814553	1.07322	1.22322	1.34496	1.13967	1.16982	1.2241	1.08121	1.05502	1.03056	0.985564	1.31053	1.41701	1.48342	1.12511	0.856782	0.673592	0.679942	0.783674	1.01812	0.875595	0.917754	0.992969	1.0451	1.15145	0.848706	0.716337	0.510422	0.877629	1.13073	0.790226	0.673429	0.647021	0.820013	1.36243	1.01287	0.947092	1.11634	0.986422	1.24711	0.866263	0.760062	0.968391
Gm28706	0	0	0	0	0	0	0	0	0	0	0	0	0	0	0	0	0	0	0	0	0	0	0	0	0	0	0	0	0	0	0	0	0	0	0	0	0	0	0	0	0	0	0	0	0	0	0	0	0
Slc35f5	0.273753	0.121289	0.0703265	0.111724	0.176345	0.161377	0.0791434	0.0730905	0.147165	0.221569	0.160177	0.0649719	0.103253	0.133731	0.14388	0.279931	0.0506742	0.101019	0.181046	0.227922	0.371982	0.160648	0.178906	0.190563	0.32207	0.14985	0.0583569	0.0662276	0.126432	0.144762	0.213654	0.104131	0.117896	0.0913203	0.140668	0.453143	0.218022	0.219781	0.311407	0.274626	0.295529	0.111548	0.154526	0.240099	0.260425	0.336642	0.148432	0.160289	0.2277
Gpr39	0	0.000840838	0.00172999	0	0	0.00302289	0	0.000517687	0.00329109	0.00725235	0	0	0	0	0	0	0	0.00209991	0.00314286	0.00337919	0	0	0	0	0	0	0	0	0	0.000723269	0	0	0	0	0	0	0	0	0	0	0	0	0.00102362	0.00382675	0.00159448	0	0	0	0
Lypd1	0.00158125	0.000548631	0.00254532	0.0017119	0.000844362	0	0	0.000899785	0	0.00289498	0.000169891	0	0	0	0.00248949	0	0	0	0.00134115	0.00121928	0	0	0	0	0	0	0	0	0	0	0.0159061	0	0	0	0	0	0	0	0	0.00393504	0	0	0	0	0	0	0.00326264	0	0.00229295
Nckap5	0.00699911	0.0199523	0.00149819	0.00153204	0.000299532	0.00777955	0.0408345	0.0107585	0.0249715	0.0259517	0.000471044	0	0.00304413	0.0021465	0	0	0.0239211	0.00191438	0.00619461	0.00821587	0.00860534	0	0	0.00779663	0.000993066	0	0.00494878	0.00354626	0.00767622	0.0062465	0.0121641	0.0182552	0.0150205	0.0706218	0.0272726	0.00473943	0.0110445	0.00804041	0	0.00986495	0.00210945	0.00114517	0.00120185	0.00340492	0	0.00109124	0	0	0
4930599A14Rik	0	0	0	0	0	0	0	0	0	0	0	0	0	0	0	0	0.0076721	0	0	0	0	0	0.00363957	0	0	0	0	0	0	0	0	0	0	0	0	0	0	0	0	0	0	0	0	0	0	0	0	0	0
Mgat5	0.137467	0.116211	0.091746	0.111569	0.104933	0.251993	0.226148	0.153692	0.197669	0.198326	0.446306	0.42736	0.50593	0.427658	0.410644	0.303318	0.230542	0.111935	0.135799	0.121702	0.0534382	0.107193	0.0868124	0.0683728	0.0866734	0.324728	0.273565	0.214505	0.211998	0.212574	0.425579	0.572882	0.335493	0.331913	0.236193	0.110734	0.119248	0.139823	0.0767449	0.089774	0.0923183	0.0696495	0.0800743	0.0808522	0.0860969	0.105902	0.0814574	0.0635261	0.0490396
Tmem163	0.00281661	0	0	0	0	0	0	0.000408255	0	0.00128556	0.00190224	0	0.00458401	0	0	0	0	0	0.00103215	0	0	0	0	0.00230695	0	0	0.000733456	0.00155362	0.00132966	0.000552441	0	0	0	0	0	0	0	0	0	0	0	0	0	0.00480539	0	0	0	0	0
Acmsd	0	0.00132237	0	0	0	0	0.00131047	0	0.000963498	0.000791954	0	0	0	0	0	0	0	0	0.000530396	0	0.00243142	0.00231028	0	0	0.00198821	0	0	0.000720035	0	0	0	0	0.00433574	0	0	0	0	0	0	0	0.00110654	0	0	0	0	0.00107853	0	0	0.00727763
2900009J06Rik	0.0568684	0.0776094	0.0422673	0.045146	0.0615433	0.0208653	0.0323875	0.054163	0.0454501	0.0524537	0.0355327	0.0349808	0.0227082	0.0379562	0.0539447	0.064354	0.0231578	0.029722	0.0414746	0.0273121	0.0518947	0.0426818	0.100545	0.0507579	0.0679853	0.0236557	0.0212132	0.0160518	0.0210179	0.0263518	0.0293196	0.010897	0	0.0139784	0.0153857	0.0691954	0.048786	0.0428627	0.0489023	0.0585216	0.0662761	0.0483516	0.0457828	0.0688608	0.0568554	0.0726936	0.0763984	0.054282	0.0785118
Ccnt2	0.366436	0.255434	0.271991	0.312755	0.444002	0.671886	0.519687	0.560465	0.622289	0.849432	0.647803	0.755383	0.743004	0.68374	0.925256	0.573181	0.631686	0.560243	0.593058	0.893562	0.36083	0.264922	0.395678	0.455385	0.546027	0.577899	0.561797	0.409179	0.466264	0.662077	1.65013	1.68463	1.38001	1.38356	1.89135	0.412921	0.393748	0.40475	0.497727	0.511705	0.27425	0.22487	0.339334	0.300705	0.385565	0.331761	0.255735	0.216499	0.278539
Map3k19	0.00423768	0.00264731	0.00575932	0.000764553	0.00164588	0	0	0.00214287	0.00101121	0.00103607	0	0	0.0014516	0.00220332	0.00472456	0	0.0120211	0.00130957	0	0.00259796	0.00151844	0	0	0	0	0.00172292	0	0.00149066	0.00106521	0	0	0	0	0	0	0	0.00350733	0.00321156	0.00377703	0	0	0	0	0	0	0	0.00264167	0	0
Rab3gap1	0.416298	0.434589	0.373087	0.294996	0.301322	0.398057	0.405843	0.44142	0.429102	0.426726	0.405624	0.596501	0.610046	0.510375	0.499824	0.398074	0.478528	0.440919	0.506776	0.50663	0.359702	0.444857	0.388709	0.371153	0.338543	0.35879	0.395271	0.403211	0.366001	0.367145	0.493317	0.747801	0.52762	0.40283	0.404848	0.437139	0.478177	0.452772	0.409802	0.470831	0.335408	0.311559	0.363016	0.337116	0.32783	0.37812	0.400913	0.336528	0.339415
Zranb3	0.0295734	0.0203811	0.0381558	0.0620166	0.0240078	0.0909726	0.156359	0.160847	0.159295	0.169071	0.0770983	0.107126	0.109239	0.141297	0.129254	0.099288	0.07718	0.104458	0.12947	0.149281	0.0216116	0.0307616	0.015338	0.0424741	0.0377528	0.142336	0.181293	0.200879	0.236087	0.231075	0.155515	0.236948	0.161069	0.17184	0.219148	0.044895	0.0406866	0.0310781	0.0331629	0.0254552	0.0293838	0.0189844	0.0145649	0.013913	0.0135278	0.0415116	0.0244155	0.0178874	0.0329776
Gm28800	0	0.00554225	0.00211649	0	0.00368422	0.00362421	0.00246302	0.00284225	0.00469931	0.00439505	0.00254841	0.00401745	0.00641612	0.00846745	0.00577676	0	0.0139975	0.00498344	0.00544693	0.00974027	0	0	0	0	0	0.000707618	0.00246748	0.00555475	0.000809627	0.00205961	0	0.0326453	0	0	0.00993909	0.00153943	0	0	0.00517386	0	0.00162606	0	0	0	0	0	0	0	0
R3hdm1	0.975513	0.959393	0.850727	0.934615	0.827316	2.21716	2.29788	1.95902	2.70842	2.56349	1.68621	1.81127	1.82378	2.42026	2.20327	1.82842	1.97934	2.03067	2.72732	2.53837	0.927823	0.638063	0.901142	0.87991	0.890834	1.67187	1.6382	1.54846	1.81483	1.9169	3.98761	4.3071	4.18369	3.57068	4.86795	0.91501	0.90703	0.786494	1.09201	0.85975	0.889885	0.627939	0.735584	0.911046	0.836325	0.897995	0.631676	0.618483	0.679023
Ubxn4	1.426	1.59412	1.33786	1.11486	1.19475	1.64345	1.91478	2.13579	1.78203	1.86275	1.62769	2.26049	2.17086	1.87342	1.99651	1.87141	2.51004	2.10496	1.90153	2.15033	1.30155	1.52763	1.32529	1.12917	1.299	1.4527	1.75939	1.84454	1.44735	1.67141	1.2504	2.02682	1.7103	1.02273	1.54245	1.40754	1.73613	1.52688	1.08487	1.59581	1.21762	1.38435	1.48007	1.2599	1.42356	1.37732	1.49324	1.36377	1.1034
Lct	0.00140197	0	0	0	0	0	0	0	0.00106682	0.000478423	0.000731964	0	0	0	0.00202507	0.00788871	0	0.00052566	0.000605141	0.0011514	0.00196045	0	0	0	0.00296728	0.00179544	0.00080565	0.000622234	0	0.00396958	0.00536154	0	0	0	0.00349366	0	0	0.00332018	0	0	0.00130776	0	0.00203328	0	0	0	0.00217712	0	0
Mcm6	0.248413	0.193768	0.189424	0.128622	0.156004	0.408163	0.63758	0.605523	0.397001	0.345117	0.373947	0.354014	0.367597	0.355505	0.3728	0.289466	0.367526	0.534492	0.397154	0.378422	0.232491	0.141523	0.164588	0.148215	0.138395	2.41015	2.26164	2.23719	2.03822	2.12431	0.438103	0.63281	0.493259	0.227494	0.333834	0.304195	0.232849	0.252071	0.233945	0.215389	0.334832	0.244222	0.26079	0.230354	0.214467	0.32299	0.251462	0.206342	0.162002
Dars	0.495231	0.288821	0.268029	0.488159	0.469267	0.54293	0.400762	0.482657	0.519779	0.597302	0.628402	0.431991	0.409579	0.518617	0.473418	0.71301	0.464494	0.496306	0.603312	0.676336	0.514216	0.302344	0.258096	0.373289	0.428406	0.659658	0.466407	0.567216	0.60263	0.661264	0.391525	0.324416	0.257966	0.341578	0.206265	0.502451	0.407885	0.281861	0.392795	0.474394	0.693844	0.374681	0.332239	0.510585	0.522202	0.534955	0.325717	0.252563	0.463474
Cxcr4	0.00882102	0.00181083	0	0.000857302	0.00177836	0.00609959	0.0126118	0.00203343	0.00531606	0.00294692	0.00131079	0.00205662	0.00839982	0.0040329	0	0.0172089	0	0.0076573	0.00684734	0.0041478	0	0	0	0	0	0.0021347	0.00240369	0.000620367	0.00262847	0.00143251	0	0	0	0	0.0318516	0	0	0	0	0	0	0	0	0.00153976	0	0	0.0019451	0	0
Gm26686	0	0	0	0	0	0	0	0	0	0	0	0	0	0	0	0	0	0	0	0	0	0	0	0	0	0	0	0	0	0	0	0	0	0	0	0	0	0	0	0	0	0	0	0	0	0	0	0	0
Thsd7b	0.0434036	0.0444569	0.0313805	0.0152228	0.00820892	0	0.0010799	0.00371698	0.000661255	0	0.00142093	0	0.00196332	0	0	0	0.0101435	0	0	0	0.0421232	0.00839916	0.00396477	0.000809809	0.00398221	0	0.00182685	0.00123339	0	0.000229563	0.0160609	0.0118034	0	0	0.0212499	0.0426965	0.0468172	0.0593632	0.057666	0.0319687	0.00443509	0.00374966	0.005143	0.00193177	0.000958212	0.0611331	0.0221729	0.0619533	0.0133594
Gm16081	0	0	0	0	0	0	0	0	0	0	0.000644773	0	0	0	0	0	0	0	0	0	0	0.00666861	0	0	0	0	0	0	0	0	0	0	0	0	0	0	0	0	0	0	0	0	0	0	0	0	0	0	0
Cd55b	0.000577652	0	0	0	0	0	0.000906581	0	0	0	0	0	0	0	0	0	0	0	0	0	0	0	0	0	0	0	0	0	0	0	0	0	0	0	0	0.00150542	0	0	0	0	0	0	0	0	0	0	0	0	0
Gm15674	0	0	0	0	0	0	0	0	0	0	0	0	0	0	0	0	0	0	0.00211555	0	0	0	0	0.00219075	0.000999874	0	0	0	0	0	0	0.00477306	0	0	0	0	0	0	0	0	0	0.00108638	0	0	0	0	0	0.00327598	0
Gm15675	0.0119538	0.0118497	0.00342216	0.00118544	0	0	0	0.000562952	0.000988438	0.000472456	0.00180692	0	0.00176947	0	0	0	0.00899229	0.00346673	0.00241589	0.00821752	0.0247254	0.00306864	0	0.00354114	0.00435249	0	0	0.00154341	0.000963397	0.000618051	0	0	0.0112878	0.0246322	0.00909286	0.0118482	0.0132435	0.0379513	0.0271731	0.0105672	0.00536334	0.00220697	0.0048695	0.00220183	0.00233074	0.0456188	0.0214761	0.0220433	0.00456253
Cd55	0.271975	0.164997	0.114867	0.111247	0.105005	0.013383	0.0125651	0.0147279	0.030788	0.0370231	0.00817514	0.012104	0.0128251	0.0192327	0.0201339	0.0704545	0.0971874	0.0754886	0.134298	0.133608	0.229743	0.135703	0.0688435	0.14533	0.108709	0.00327132	0.00674068	0.00210293	0.00345674	0.00663924	0.0479969	0.0193129	0.0198759	0.138287	0.0795423	0.370631	0.308543	0.391796	0.548255	0.550737	0.068586	0.0327213	0.0135899	0.0478031	0.043355	0.468738	0.210769	0.157835	0.1912
Gm16083	0.00143279	0	0	0.00209617	0.00301303	0	0	0.00251533	0	0.00257562	0	0	0.0023936	0	0	0	0.00870474	0.00295545	0.00227875	0.00157491	0.00180557	0	0.0044585	0	0	0	0	0	0	0	0.010657	0	0	0	0	0.00171999	0.00320259	0	0	0.00234032	0.0014783	0	0	0	0	0.00550261	0.00345862	0	0.00529191
Zp3r	0	0	0	0	0	0	0	0	0	0	0	0	0	0	0	0	0	0	0.000873907	0	0	0	0	0	0	0	0	0	0	0	0	0	0	0	0	0	0	0	0	0	0	0	0	0	0	0	0	0	0
C4bp	0	0	0	0	0	0	0	0	0	0	0	0	0	0	0	0	0	0	0	0	0	0	0	0	0	0	0	0	0	0	0	0	0	0	0	0.00133477	0	0	0	0	0	0	0	0	0	0.000571669	0	0	0
Gm29427	0	0	0	0	0	0.00267265	0	0	0	0	0	0	0.0014085	0	0.00244341	0	0	0	0.000905654	0.000639784	0.00323199	0	0	0	0	0	0.000765955	0.00109615	0	0	0	0	0	0	0	0.000780687	0	0	0	0	0	0	0.00161278	0	0	0	0	0	0
Pfkfb2	0.0192499	0.00829041	0.0127989	0.0096831	0.0146111	0.0334468	0.0132835	0.0140992	0.0302637	0.0348469	0.0249543	0.0115256	0.0111862	0.0541788	0.013701	0.0248532	0.0222947	0.0137506	0.0407042	0.0339071	0.0178004	0.0308992	0.0274931	0.0385531	0.0212652	0.0321517	0.00920693	0.012683	0.0265553	0.0181474	0.198125	0.0196359	0.0267606	0.0610804	0.0875188	0.0323711	0.00440487	0.00424993	0.0206336	0.0183066	0.0234067	0.00962882	0.00500271	0.0211169	0.0175323	0.0341595	0.00909156	0.0191312	0.0222162
Yod1	0.211068	0.162343	0.145941	0.203021	0.162117	0.348861	0.184327	0.165688	0.279179	0.239234	0.139944	0.147489	0.19424	0.262211	0.126449	0.148377	0.147555	0.159887	0.244664	0.281842	0.225267	0.119835	0.111148	0.225227	0.203447	0.154691	0.127001	0.152002	0.203235	0.160642	0.178732	0.215543	0.196282	0.26593	0.17125	0.163072	0.117464	0.186615	0.195041	0.201448	0.169423	0.116491	0.117896	0.163932	0.122321	0.250663	0.147292	0.16652	0.262683
AA986860	0.0116494	0.00344736	0.0150001	0.0083017	0.00558462	0.0147314	0.0139388	0.00444667	0.00626308	0.00967194	0.00373047	0.00152348	0.00342485	0.00791798	0.00305191	0	0.00757612	0.00723554	0.0243647	0.0202274	0.00700665	0.00535919	0.0183852	0.0169851	0.0175578	0.00470331	0.000973483	0.00388824	0.00335804	0.0066429	0.00963825	0.0169531	0.00635692	0.0162443	0.0193804	0.00319248	0.0109008	0.0167484	0.0167385	0.0112723	0.00456019	0.0156338	0.0198932	0.0069357	0.015878	0.014437	0.00367982	0.0173949	0.00717577
Gm28857	0	0	0	0	0	0	0	0	0	0	0	0	0	0	0	0	0	0	0	0	0	0	0	0	0	0	0	0	0	0	0	0	0	0	0	0	0	0	0	0	0	0	0	0	0.000902018	0	0	0	0
Gm28856	0	0	0	0	0	0.00845112	0.00104236	0.00121674	0.00543759	0.00168044	0	0	0	0.00201795	0	0	0	0	0.00047199	0.00180411	0	0	0	0	0	0.00393382	0.00193695	0.000841464	0.00444975	0.00137317	0.0665369	0.00615148	0.00709307	0.0130064	0	0	0	0	0	0	0.00259843	0	0	0	0.000557406	0.00164748	0	0	0.00229311
Fcamr	0	0	0	0	0	0	0	0	0	0	0	0	0	0	0	0	0	0	0	0	0	0	0	0	0	0	0	0	0	0	0	0	0	0	0	0	0	0	0	0	0	0	0	0	0	0	0	0	0
Gm15848	0	0	0	0	0	0	0	0	0	0	0	0	0	0	0	0	0	0	0	0	0	0	0	0	0	0	0	0	0	0	0	0	0	0	0	0	0	0	0	0	0	0	0	0	0	0	0	0	0
Pigr	0	0	0	0	0	0	0	0.000269713	0	0.000644371	0.000598293	0	0	0	0	0	0	0.000469163	0.000731754	0	0	0	0	0.0037609	0	0	0	0	0	0	0	0	0	0	0	0	0	0	0	0	0	0	0	0	0	0	0	0	0
Fcmr	0	0	0	0	0	0	0	0	0	0	0	0	0	0	0	0	0	0	0	0	0	0	0	0	0	0	0.00108645	0	0	0	0	0	0	0	0	0	0	0	0	0	0	0	0	0	0	0	0	0	0
Il24	0.00170517	0.00228806	0	0	0	0	0	0	0	0	0	0	0	0	0	0	0	0	0	0	0	0	0	0	0	0.000771789	0	0	0	0	0	0	0	0	0	0	0.00302513	0	0	0	0	0.00644008	0	0	0	0.000696274	0	0	0
Il20	0	0	0	0	0	0	0	0	0	0	0	0	0	0	0	0	0	0	0	0	0	0	0	0	0	0	0	0	0	0	0	0	0	0	0	0	0	0	0	0	0	0	0	0	0	0	0	0	0
Il19	0	0	0.00103543	0	0	0	0	0.000521182	0	0.000851571	0	0	0	0	0	0	0	0	0	0	0	0	0.00338359	0	0	0	0	0	0	0	0	0	0.00310633	0	0	0.00224579	0	0	0	0	0	0	0	0	0	0	0	0	0
Il10	0	0	0	0	0	0	0	0	0	0	0	0	0	0	0	0	0	0	0	0	0	0	0	0	0	0	0	0	0	0	0	0	0	0	0	0.00351546	0	0	0.011403	0	0	0	0	0.00142847	0	0.00376931	0	0	0.00880431
Mapkapk2	0.645566	0.665266	0.640025	0.502288	0.51287	0.603617	0.558306	0.52635	0.449364	0.511233	0.575352	0.671769	0.707374	0.537719	0.496768	0.760121	0.630989	0.659047	0.596015	0.543433	0.471995	0.496264	0.42185	0.323771	0.370517	0.58634	0.497794	0.512725	0.397638	0.406557	0.545772	0.439933	0.411187	0.345351	0.187114	0.635789	0.605519	0.544072	0.446657	0.486404	0.565658	0.569296	0.650139	0.504923	0.483526	0.584388	0.581811	0.595152	0.39974
Dyrk3	0.0041541	0.00547566	0.00402639	0.00280394	0.00491783	0.0478479	0.0465632	0.0531138	0.0273733	0.0587118	0.0883507	0.0685352	0.0917534	0.069498	0.121539	0.0152183	0.0490469	0.0431939	0.0510304	0.0557991	0.0153262	0.00340909	0.00259019	0	0.00729009	0.0921318	0.0709057	0.0866453	0.0695785	0.0895005	0.0300861	0.0937325	0.0212721	0	0.0664361	0.0115156	0.00814752	0.014353	0	0.0113207	0.0113359	0.00809767	0.0104449	0.0169292	0.0107547	0.00498689	0.00325908	0.010798	0.00659968
Eif2d	0.17362	0.143828	0.130303	0.21699	0.187776	0.212654	0.189143	0.220794	0.225156	0.212699	0.190103	0.19239	0.207518	0.19688	0.195703	0.199914	0.181115	0.192946	0.20342	0.197084	0.148499	0.103867	0.135731	0.141966	0.161354	0.196299	0.196082	0.208645	0.21273	0.211772	0.158723	0.17106	0.0749227	0.194356	0.246244	0.142468	0.161149	0.128707	0.0912513	0.127905	0.145594	0.0978272	0.129163	0.151071	0.166723	0.112658	0.114218	0.101033	0.141149
Rassf5	0.113198	0.122043	0.158413	0.164782	0.16314	0.010239	0.00458734	0.0212392	0.0163806	0.0137041	0.00669201	0.00671187	0.00433506	0	0.00653081	0	0	0.045085	0.0259367	0.0446681	0.136562	0.169462	0.126343	0.103738	0.116692	0.00442932	0.00586037	0.00533106	0.00617675	0.00643856	0	0.0155416	0.00604678	0.0492046	0.0580868	0.0290713	0.0489374	0.0506794	0.0291288	0.0400109	0.337501	0.453069	0.501282	0.541558	0.545778	0.0720496	0.0994553	0.151298	0.112016
Ikbke	0.0295773	0.0139781	0.021287	0.0375196	0.0223753	0.0292145	0.0193057	0.0307886	0.0390479	0.03541	0.0383449	0.050769	0.0375321	0.0314705	0.0295968	0.0440528	0.0361898	0.0296061	0.030592	0.030819	0.0356738	0.0278519	0.01672	0.0254687	0.0327416	0.046032	0.0189798	0.0194664	0.0211668	0.027848	0.0521697	0.11529	0.0654867	0.132323	0.119627	0.0261339	0.0133884	0.0431605	0.0452955	0.047893	0.0217484	0.0172816	0.0350803	0.0141785	0.0314567	0.0144926	0.0377219	0.0333544	0.0338187
Gm28914	0	0	0	0	0	0	0	0	0	0	0	0	0	0	0	0	0	0	0	0	0	0	0	0	0	0	0	0	0	0	0	0	0	0	0	0	0	0	0	0	0	0	0	0	0	0	0	0	0
Gm28913	0.00154188	0.00200038	0	0.00106696	0.00469504	0	0	0	0.000956265	0.000796686	0.00121077	0	0	0	0	0	0	0.00292385	0.00213479	0.00196161	0	0	0.00254653	0	0.000862514	0.000720405	0.00117936	0	0.009887	0	0	0	0.00401684	0	0	0.00192833	0.00346726	0	0.0059601	0	0.00361643	0.00467128	0.00138251	0.00293056	0.00305107	0.00286535	0	0.0144185	0
Srgap2	0.356031	0.393589	0.354334	0.328486	0.279361	0.149099	0.231923	0.220446	0.239305	0.211947	0.332663	0.433558	0.357527	0.376155	0.287363	0.281342	0.354526	0.442305	0.397114	0.347939	0.288025	0.246742	0.299526	0.350696	0.250105	0.293719	0.2706	0.229099	0.214977	0.214182	0.558362	0.681028	0.645462	0.396159	0.469014	0.216635	0.252651	0.247799	0.310673	0.206834	0.175918	0.210546	0.269173	0.267649	0.197588	0.239765	0.204209	0.273747	0.314727
Fam72a	0.0319334	0.00476198	0.014639	0.0351809	0.0338738	0.00449209	0.0125773	0.0130068	0.0173248	0.0216816	0.0280154	0.0236683	0.0226758	0.0372667	0.0308631	0	0.037735	0.0173329	0.0225643	0.0383841	0.015689	0.00346022	0	0.00567895	0.0210532	0.0305677	0.0235798	0.0160532	0.017412	0.0372309	0.0802153	0.0694827	0.0354875	0.0144936	0.0117706	0.0106226	0	0	0	0.0106625	0.0229045	0.0167741	0.00159037	0.00886934	0.00736057	0.015557	0.00923712	0.00205768	0.0133049
Avpr1b	0	0	0	0	0	0	0	0	0	0	0	0	0	0	0	0	0	0	0	0	0	0	0	0	0	0	0	0	0	0	0	0	0	0	0	0	0	0	0	0	0	0	0	0	0	0	0	0	0
Ctse	0	0	0	0	0	0	0.00320226	0	0	0	0.0118827	0.0110874	0.0161184	0.00568634	0.012804	0	0	0	0	0.000857948	0	0	0	0	0	0.00278085	0.00781458	0.00440104	0	0.00152532	0	0	0.00532492	0	0	0	0	0	0	0	0	0	0	0	0	0	0.00165192	0	0
Rab7b	0.0905425	0.156633	0.088661	0.155458	0.138893	0.021122	0.013204	0.0148291	0.031693	0.0231325	0.0683979	0.109859	0.18796	0.160227	0.155338	0.100415	0.0530515	0.0889406	0.108047	0.095464	0.128031	0.22321	0.20499	0.168714	0.222434	0.059547	0.0557533	0.0397031	0.0393518	0.0499437	0.0381115	0.0658093	0.0694875	0.037693	0.0475291	0.0749652	0.167742	0.123979	0.195755	0.179561	0.0711288	0.077458	0.13666	0.080055	0.110416	0.100722	0.17668	0.260847	0.170234
Slc26a9	0	0	0	0	0	0	0	0	0	0	0	0	0	0	0	0	0	0	0	0	0	0	0	0	0	0	0	0	0	0	0	0	0	0	0	0	0	0	0	0	0	0	0	0	0	0	0	0	0
Pm20d1	0.00876207	0.0194556	0.00345351	0.0176264	0.00144695	0.0222632	0.00784941	0.0107619	0.00977163	0.00731578	0.0214448	0.0107511	0.0277923	0.0364884	0.0211439	0.0451687	0.0164803	0.00559853	0.00430036	0.00284399	0.012904	0.0345883	0.00888919	0.00500805	0.00206148	0.0135213	0.0102337	0.0115816	0.013352	0.0101143	0.0260995	0.0127018	0.00529946	0.0171754	0.00609753	0.00365642	0.0114518	0.00362438	0	0.00288796	0.00651219	0.00221875	0.0199664	0.00832068	0.00382746	0.00110192	0.016233	0.00661086	0
Slc41a1	0.224809	0.330935	0.254801	0.340319	0.261615	0.355895	0.353522	0.243823	0.342041	0.368246	0.223076	0.249693	0.263644	0.267299	0.260948	0.291359	0.346885	0.273126	0.311997	0.378602	0.263084	0.348248	0.319582	0.324361	0.268639	0.237663	0.254376	0.245727	0.280915	0.297814	0.316336	0.387729	0.333522	0.146325	0.215684	0.251814	0.317446	0.337233	0.408183	0.225998	0.172494	0.196054	0.284302	0.34019	0.205178	0.231939	0.280068	0.311596	0.354719
Rab29	0.0448517	0.0558028	0.0518461	0.0665205	0.0741813	0.0248697	0.0104274	0.00820539	0.0146045	0.0127907	0.0111593	0.00654168	0.00627787	0.0174397	0.01766	0	0	0.00840977	0.0125491	0.00986177	0.0459749	0.0540894	0.00639037	0.035454	0.0465311	0.00891595	0.00779408	0.0128748	0.00953594	0.0107482	0.00491305	0	0.00563624	0	0	0.0324709	0.0369118	0.0372651	0.0544223	0.0571348	0.0249981	0.0104787	0.0408301	0.0303581	0.0519783	0.0302901	0.0130959	0.044233	0.0136317
Nucks1	1.35496	1.3839	0.919046	1.11576	1.23881	1.49579	1.58243	1.11867	1.38952	1.20327	1.60341	1.7469	1.52593	1.66819	1.68309	1.31346	1.31423	1.04732	1.3878	1.25067	1.42835	1.37694	0.910081	1.39748	1.31453	2.44483	2.54619	2.18382	2.65634	2.39841	1.05235	1.44698	0.850411	0.747867	0.942528	1.50299	1.70991	1.28289	1.17621	1.54134	1.72917	1.70035	1.48749	1.81868	1.82223	1.41465	1.36545	1.12229	1.44964
Slc45a3	0.00608851	0.00276653	0.00746146	0.00280857	0.0071092	0.00227329	0	0.00119302	0	0.000999737	0.00065044	0.00298984	0	0	0.00123035	0	0	0.00454166	0.00412019	0.0028562	0.0143265	0.0108546	0.015555	0.0213126	0.0189123	0	0.00100389	0.000554985	0.00327229	0.001365	0	0	0.00492295	0	0	0.00406675	0.00173322	0.0110198	0.0175591	0.00765214	0.0123934	0.00814834	0.0144532	0.0118662	0.00975335	0.00478279	0.00911127	0.0102205	0.0203845
Elk4	0.302642	0.157448	0.168641	0.283879	0.227497	0.295202	0.185434	0.168852	0.285128	0.271563	0.246395	0.182761	0.161913	0.274702	0.294697	0.30421	0.19139	0.188248	0.309306	0.323225	0.398794	0.163616	0.209015	0.369424	0.294591	0.254712	0.159534	0.129385	0.225031	0.226414	0.327798	0.340496	0.228744	0.733286	0.37203	0.379839	0.25203	0.22228	0.384313	0.337511	0.385201	0.202005	0.167814	0.368771	0.347793	0.424303	0.246263	0.155754	0.376037
Mfsd4a	0.0909947	0.0761253	0.0748306	0.122268	0.0842193	0.0992154	0.0959836	0.0687725	0.104825	0.126811	0.13345	0.137845	0.118858	0.183153	0.1932	0.116449	0.111036	0.0619103	0.114304	0.105131	0.110944	0.0878329	0.0834095	0.169964	0.180019	0.0920812	0.0900182	0.0737081	0.118249	0.124436	0.180687	0.259065	0.262432	0.212316	0.493593	0.102953	0.0872179	0.0580125	0.150801	0.146934	0.090141	0.0876343	0.0716542	0.151605	0.113664	0.0951789	0.0604727	0.0519575	0.136172
Gm26892	0	0	0	0.00183111	0	0.00161898	0	0.00115828	0.000680474	0.000762195	0.000682006	0.00250957	0.00382037	0.00214298	0	0	0	0.000891986	0.000823239	0.00190482	0.0108534	0	0	0	0.00137764	0.000962226	0	0	0	0	0	0.0271133	0	0	0	0.00168102	0	0	0	0	0	0	0.00425493	0	0.000833928	0.00196997	0	0	0.0028581
Cdk18	0.00119594	0	0	0	0.000759244	0.0333854	0.00881825	0.00377788	0.00721372	0.00500307	0.0291998	0.0213062	0.0156799	0.0135855	0.0349137	0	0.0251333	0.00265856	0.00169827	0.00599069	0	0	0	0	0	0.027895	0.0243485	0.0218808	0.0104962	0.0128344	0.0366975	0.0327593	0.00712041	0	0	0	0	0	0.0059601	0.00384755	0	0.00423701	0.000869266	0.00225201	0.00230515	0	0	0	0
Gm29629	0	0	0	0	0	0	0.00408076	0	0	0	0	0	0	0	0	0	0	0	0	0	0	0	0	0	0	0	0	0	0.000819619	0	0	0	0	0	0	0	0	0	0	0	0	0	0	0	0	0	0	0	0
Lemd1	0	0	0	0	0	0.00171713	0	0.00159558	0	0	0.00862622	0.00477287	0.000891698	0	0.000902895	0	0	0	0	0	0	0	0	0	0	0.00456156	0.00259708	0	0	0.000564421	0	0	0	0	0	0	0	0	0	0	0.000818205	0	0	0	0	0	0	0	0
1700037F24Rik	0	0	0	0	0	0	0	0	0	0	0	0	0	0	0	0	0	0	0	0	0	0	0	0	0	0	0	0	0	0	0	0	0	0	0	0	0	0	0	0	0	0	0	0	0	0	0	0	0
Gm10188	0	0	0	0	0	0	0	0	0	0	0	0	0	0	0	0	0	0	0	0	0	0	0	0	0	0	0	0	0	0	0	0	0	0	0	0	0	0	0	0	0	0	0	0	0	0	0	0	0
Gm29630	0	0	0	0	0	0	0	0	0	0	0	0	0	0	0	0	0	0	0	0	0	0	0	0	0	0	0	0	0	0	0	0	0	0	0	0	0	0	0	0	0	0	0	0	0	0	0	0	0
Klhdc8a	0	0	0.00106092	0.00275335	0	0	0	0	0.00176953	0	0	0.00153388	0	0	0	0	0	0.000844406	0.000760647	0	0	0	0	0.00287229	0	0	0	0	0	0	0	0	0	0	0	0	0	0	0	0.0023459	0	0	0	0	0	0	0	0	0
Nuak2	0.00396156	0.0091955	0.00434768	0.00311442	0	0.00414023	0.0033112	0	0	0.000561735	0.0176339	0.0157992	0.0412657	0.03862	0.0171759	0.0115722	0.0120993	0.000177166	0	0.00118314	0.00823833	0	0	0	0.00235326	0.0164674	0.00576956	0.00178144	0.00289074	0.00588173	0	0	0	0	0.00762565	0.00585475	0.00126638	0	0.00475126	0	0.00629902	0.00695328	0.00615455	0.00350834	0.00356467	0.000927705	0.00233483	0.0114254	0
F730311O21Rik	0	0	0	0	0	0	0	0	0	0	0	0	0	0	0	0	0	0	0	0	0	0	0	0	0	0	0	0	0	0	0	0	0	0	0	0	0	0	0	0	0	0	0	0	0	0	0	0	0
Tmcc2	0.0702161	0.0894831	0.0690814	0.0478699	0.0831073	0.0506501	0.0338955	0.048033	0.0439742	0.050506	0.0199417	0.0276313	0.0186646	0.0300713	0.0571738	0.0899216	0.0472739	0.0555519	0.0598661	0.0748681	0.0814933	0.0658841	0.0670253	0.052241	0.0645761	0.0260014	0.0264577	0.0328128	0.0201489	0.0415477	0.0489431	0.0227941	0.0568315	0	0.033949	0.0677525	0.0947724	0.0843361	0.0378563	0.0917745	0.0557216	0.0533292	0.0406821	0.0516913	0.0665534	0.0601255	0.0668816	0.0812265	0.0865049
Gm15849	0	0	0	0	0	0	0	0	0	0	0	0	0	0	0	0	0	0	0	0	0	0	0	0	0	0	0	0	0	0	0	0	0	0	0	0	0	0	0	0	0	0	0	0	0	0	0	0	0
Dstyk	0.293789	0.317052	0.266139	0.283573	0.25825	0.247714	0.222219	0.231941	0.233313	0.297375	0.28953	0.372051	0.372217	0.298794	0.341948	0.299351	0.358662	0.338844	0.323572	0.391361	0.246131	0.342186	0.362734	0.368927	0.340337	0.207472	0.203286	0.19327	0.192427	0.228575	0.427945	0.263377	0.393705	0.301764	0.317325	0.318166	0.350246	0.3929	0.327568	0.301079	0.176658	0.184393	0.244501	0.215215	0.252115	0.237769	0.276959	0.291284	0.273073
Rbbp5	0.0795364	0.0668533	0.0799837	0.0570704	0.0791759	0.125201	0.0894358	0.0819034	0.0993417	0.121758	0.157958	0.131452	0.15477	0.178137	0.175247	0.110387	0.106214	0.0877761	0.105882	0.114894	0.0696742	0.0935825	0.0722211	0.092643	0.119296	0.135401	0.120035	0.0961912	0.112014	0.134834	0.0827103	0.0718445	0.0822312	0.0386932	0.152214	0.075901	0.094339	0.0706181	0.156233	0.150142	0.0799017	0.0415223	0.0536514	0.0617813	0.0895404	0.0495172	0.0466104	0.100778	0.0705574
Tmem81	0.00479607	0.00352804	0.00528756	0.00283433	0.00262515	0	0	0.00201841	0.00430054	0.0134588	0.0107023	0.0048854	0.00103011	0.00690305	0.0063452	0.0182678	0	0.00566417	0.002899	0.011614	0.0131577	0.0184282	0.00177888	0.0109279	0.0103878	0.00579999	0.00350386	0.000500134	0.00336071	0.00514486	0.00947609	0.0106072	0.00663067	0	0.0136386	0.00335642	0.003218	0.00423696	0.00619125	0.016357	0.00256788	0.00114076	0.0074281	0.00267294	0.00217129	0	0.00251751	0.00631475	0.00381255
Cntn2	0.00139646	0	0.00180706	0	0	0	0.0088829	0.000978712	0.00461175	0.00245493	0.00109579	0.00094559	0	0	0.00127274	0	0	0.00419607	0.00260826	0.00477346	0	0	0.00653465	0	0.00288884	0	0.00489401	0.00135906	0	0.00324062	0	0.0092891	0.00760389	0.0450901	0	0	0.00438322	0	0	0.00481113	0.000946806	0.000972941	0	0	0	0.000947246	0.00930755	0	0.00280715
Nfasc	0	0	0	0	0.000283837	0	0.0112064	0.00134321	0.00182761	0.00249973	0.000599004	0.000699102	0.0030423	0.00338765	0.00132396	0	0	0.003443	0.00153792	0.00520223	0.00158578	0	0.00698267	0	0	0.000820689	0.00206864	0.000670994	0.00384197	0.00472033	0	0	0	0	0.00524596	0.00450097	0.00516246	0	0	0	0	0	0	0	0	0	0	0	0
Gm10538	0	0	0	0	0	0	0	0	0	0	0	0	0	0	0	0	0	0	0	0	0	0	0	0	0	0	0	0	0	0	0	0	0	0	0	0	0	0	0	0	0	0	0	0	0	0	0	0	0
Lrrn2	0.290398	0.107054	0.0982453	0.116281	0.0998774	0.0157797	0.00558005	0.0247313	0.0596955	0.107637	0.00579975	0.00240702	0.00388637	0.011263	0.00562978	0.0151707	0.0213748	0.0407963	0.0525245	0.0727768	0.0662422	0.0234942	0.0112835	0.00581189	0.00995212	0.0134238	0.00832705	0.0127554	0.0297496	0.0607323	0.0180888	0	0.00878485	0.0377507	0.0469852	0.0260928	0.0322969	0.0348491	0.0671926	0.0542043	0.0596092	0.00769144	0.00673452	0.0111271	0.00236956	0.0470589	0.0188776	0.0269374	0.0196521
Mdm4	0.460436	0.650157	0.558141	0.549977	0.427109	0.509952	0.694144	0.537053	0.540457	0.516194	0.519824	0.738376	0.728695	0.599957	0.605104	0.732131	0.866588	0.550404	0.575836	0.584791	0.627501	0.712849	0.66607	0.826561	0.565241	0.449066	0.55833	0.49194	0.408607	0.474564	1.03952	1.4328	0.775726	0.905405	0.858243	0.516693	0.636554	0.664355	0.685886	0.507971	0.488472	0.508908	0.562285	0.514997	0.414187	0.475798	0.519577	0.619299	0.578681
Pik3c2b	0.0722557	0.0873728	0.0838033	0.0779041	0.0595651	0.0119313	0.0249164	0.0187679	0.0199269	0.0222197	0.00759171	0.0194272	0.0170859	0.0358857	0.0208373	0.0263047	0	0.033314	0.0369236	0.0264387	0.0233143	0.0513037	0.0254642	0.0080584	0.0150904	0.0149502	0.0337139	0.018341	0.038094	0.0254806	0.0188715	0.0225816	0.0517382	0	0.0385546	0.0205418	0.0416265	0.0170006	0.0168929	0.0258099	0.0346628	0.0438482	0.0403484	0.0269283	0.0141239	0.0275674	0.0343454	0.0365181	0.0334099
Gm28609	0	0	0	0	0	0	0	0	0	0	0	0	0	0	0	0	0	0	0	0	0	0	0	0	0	0	0	0	0	0	0	0	0	0	0	0	0	0	0	0	0	0	0	0	0	0	0	0	0
Ppp1r15b	0.478611	0.375315	0.271343	0.331538	0.250044	0.254001	0.238063	0.225819	0.290787	0.305045	0.285808	0.333143	0.329012	0.342741	0.272141	0.432683	0.308844	0.2032	0.284662	0.326564	0.42342	0.306228	0.231965	0.29789	0.266084	0.309531	0.235977	0.228666	0.22875	0.291235	0.493872	0.411415	0.372993	0.273638	0.352396	0.435308	0.483048	0.302462	0.452613	0.284038	0.433609	0.334264	0.315855	0.385433	0.253236	0.530587	0.457539	0.342254	0.415822
Plekha6	0.0185308	0.025109	0.00491622	0.00341291	0.00226856	0.00519665	0	0.00153542	0.0037908	0.00111248	0.00923278	0.0109326	0.0191037	0.00508086	0.00528066	0	0.00519483	0.00545638	0.0073565	0.00350181	0.06415	0.0332399	0.0609656	0.0163318	0.020573	0.00687695	0.00344112	0.00291963	0.00376646	0.00389842	0.0593859	0.00536337	0.00253637	0	0.0246606	0.305585	0.304563	0.316968	0.306875	0.306093	0.0188628	0.0238362	0.0192243	0.0267406	0.0164556	0.0940757	0.0709797	0.0754667	0.0609978
Gm19461	0.00106072	0.00295015	0.00233242	0	0.000813762	0	0.00135187	0	0	0	0.000780039	0	0	0	0	0	0	0	0.000448629	0	0.0103962	0.00715324	0	0	0.00258064	0.000656651	0	0	0	0	0	0	0	0	0	0.110859	0.0666465	0.0765649	0.0857301	0.126664	0.00956875	0.0112107	0.0127527	0.0186309	0.010983	0.0122041	0.00516864	0.00664358	0.015079
Golt1a	0	0	0	0	0	0	0	0	0	0	0.000640015	0.000763859	0	0	0	0	0	0	0	0	0	0	0	0	0	0	0	0	0	0	0	0	0	0	0	0.00340498	0	0.00647016	0.00407906	0	0	0	0	0	0	0	0	0	0
Kiss1	0	0	0	0	0	0	0	0	0	0	0	0	0	0	0	0	0	0	0	0	0	0	0	0	0	0	0	0	0	0	0	0	0	0	0	0	0	0	0	0	0	0	0	0	0	0	0	0	0
Gm28040	0	0	0	0	0	0	0	0	0	0	0	0	0	0	0	0	0	0	0	0	0	0	0	0	0	0	0	0	0	0	0	0	0	0	0	0	0	0	0	0	0	0	0	0	0	0	0	0	0
Kiss1.1	0	0	0	0	0	0	0	0	0	0	0	0	0	0	0	0	0	0	0	0	0	0	0	0	0	0	0	0	0	0	0	0	0	0	0	0	0	0	0	0	0	0	0	0	0	0	0	0	0
Ren1	0.0149784	0.0247536	0.00583012	0.00182981	0	0	0	0	0	0	0.00168066	0.000923594	0.00184155	0	0.000860942	0	0	0	0	0.00139651	0.00112785	0	0	0	0	0.00144926	0	0	0.0015188	0	0.00602751	0.0163357	0	0	0	0.00551434	0	0	0	0.00226688	0.0485692	0.0119026	0.015474	0.0164543	0.0111723	0.0143752	0	0	0
Etnk2	0.0689573	0.0413709	0.0261548	0.00534851	0.0222289	0.975967	0.650234	0.47017	0.481213	0.641696	1.86387	2.11754	2.43967	1.87645	2.18857	1.30197	1.16445	0.286415	0.3614	0.419575	0.0555498	0.0380609	0.0593793	0.0154356	0.0286192	1.41699	0.977656	0.90178	0.794891	0.859068	2.32767	2.02173	1.21215	0.982708	1.24064	0.209888	0.212948	0.174523	0.04039	0.137764	0.11362	0.0702329	0.0517236	0.0670497	0.0243246	0.0769556	0.0608231	0.0673048	0.0344175
Sox13	0.0335628	0.0380976	0.0270728	0.0386232	0.0366455	0.0120993	0.00485499	0.00625443	0.0105781	0.0192641	0.0416903	0.038862	0.0297177	0.0408466	0.0514833	0.0122102	0.0058133	0.0129248	0.0120102	0.0214899	0.096979	0.0747689	0.0929827	0.0543385	0.0623197	0.0389669	0.0351365	0.0210199	0.0141207	0.0222369	0.0537459	0.0684514	0.018997	0	0.00909288	0.107873	0.162159	0.176163	0.0425633	0.0947868	0.119496	0.136399	0.110832	0.0587379	0.156604	0.100297	0.0843592	0.0670815	0.06033
Snrpe	2.52956	2.0901	2.52467	2.36499	2.60498	3.59466	3.55982	4.54227	3.98309	4.29835	3.86432	3.48456	2.91941	3.25841	3.64663	2.99256	2.47318	3.50516	3.09678	3.30916	2.53405	2.14219	2.39246	2.07412	2.48871	4.33653	4.44031	4.61327	4.7226	5.08178	0.927267	1.32529	1.46433	0.800042	1.51168	2.63256	2.14011	2.26756	2.04389	2.62767	3.24114	3.02799	3.15485	3.23678	3.70004	2.66411	2.21772	2.2594	2.33693
Gm26706	0.000949874	0.00500527	0.00477104	0.00353791	0	0.00253966	0	0.00405403	0.00408343	0.00271179	0.00179317	0.00255263	0	0.00375413	0.00357647	0.00945777	0	0.00144846	0.00134397	0.00327669	0	0	0	0.00506004	0	0.00245874	0.000851982	0.000758391	0.0014031	0.00260584	0.00881867	0	0.00923166	0	0	0.00340498	0.00198582	0	0.00627964	0	0.00155204	0	0	0.0019438	0	0.000952493	0	0	0.0116891
Zc3h11a	0.0523229	0.030319	0.0175551	0.0553013	0.0546473	0.0735494	0.0716568	0.0387833	0.107986	0.0912577	0.0692447	0.060072	0.0445518	0.0925295	0.103893	0.0477903	0.0502345	0.0484507	0.0728448	0.0752468	0.0439952	0.041112	0.0331393	0.0656795	0.0508539	0.0623832	0.0530421	0.0630309	0.0707944	0.0679033	0.140376	0.162389	0.0995667	0.145084	0.200421	0.030926	0.0523792	0.0176875	0.0601813	0.0606956	0.045715	0.0386072	0.0345937	0.0820756	0.0433861	0.0487418	0.0261631	0.0311935	0.131426
Zc3h11a.1	0	0	0	0	0	0	0	0	0	0	0	0	0	0	0	0	0	0	0	0	0	0	0	0	0	0	0	0	0	0	0	0	0	0	0	0	0	0	0	0	0	0	0	0	0	0	0	0	0
Gm38394	0.021981	0.0218769	0.0111121	0.0341477	0.0317143	0.0488856	0.042693	0.0477073	0.0748318	0.054815	0.042865	0.0572981	0.0505376	0.0799109	0.0657091	0.0610192	0.0371289	0.0284004	0.0671088	0.0501	0.0315557	0.0125334	0.0445475	0.0719186	0.0412057	0.0305526	0.0451576	0.0366014	0.0502255	0.0504046	0.124497	0.116746	0.17011	0.0942772	0.086321	0.0275189	0.0360314	0.0263465	0.0634633	0.026274	0.0247981	0.0355597	0.0260958	0.0373683	0.03606	0.0363829	0.0342836	0.0256286	0.0525956
Zbed6	0	0	0	0	0	0	0	0	0	0	0	0	0	0	0	0	0	0	0	0	0	0	0	0	0	0	0	0	0	0	0	0	0	0	0	0	0	0	0	0	0	0	0	0	0	0	0	0	0
Lax1	0.0317959	0.0071244	0.0139301	0.0163842	0.00610407	0.00625303	0.00105516	0.00507888	0.00198987	0.00095131	0.00483699	0.000991462	0	0.00406558	0.00479568	0	0	0.00652959	0.00449121	0.00437024	0.00679424	0.00903787	0.00461179	0.00297243	0	0.0039578	0.0019014	0.00134812	0.00557682	0.00198304	0.0157923	0	0	0	0	0.00289272	0.00784568	0.00508627	0.00776962	0	0.00844434	0.00686773	0.0142178	0.00587424	0.0144441	0.0092302	0.00609988	0.00519187	0.0112159
Atp2b4	0.995533	1.10383	1.14039	1.25898	1.03139	0.0589584	0.0518175	0.142233	0.169114	0.105873	0.306565	0.140987	0.279129	0.245782	0.220862	0.210226	0.161838	0.454802	0.493327	0.545891	0.534489	0.630437	0.662368	0.515484	0.487664	0.201189	0.0992073	0.137965	0.157731	0.141519	0.571942	0.312722	0.550034	0.581438	0.40554	0.484114	0.397029	0.515019	0.457383	0.419673	0.467954	0.507021	0.840401	0.720697	0.688655	0.444857	0.527388	0.789266	0.578066
Gm28441	0	0	0	0	0	0	0	0	0	0	0	0	0	0	0	0	0	0	0	0	0	0	0	0	0	0	0	0	0	0	0	0	0	0	0	0	0	0	0	0	0	0	0	0	0	0	0	0	0
Optc	0.174238	0.12156	0.242431	0.197096	0.131397	0	0	0	0.00103131	0	0	0	0.00702814	0.00343625	0	0	0	0.00230351	0.00117775	0	0	0.0137476	0.00433417	0.00987653	0.0123279	0	0	0.00171467	0.00284676	0.00147828	0	0	0	0	0	0.001711	0	0.00913721	0.00397597	0	0.0161422	0.00613675	0.00638692	0.0158314	0.00711225	0.00898095	0.010874	0.0137215	0.018629
Gm15851	0	0	0	0.00282428	0.000454136	0	0	0	0	0	0	0	0	0	0	0	0	0	0.002937	0	0	0	0	0.00342879	0	0	0	0	0	0	0	0	0	0	0	0	0.00281405	0	0	0.00292721	0	0	0	0	0	0	0	0	0.00203333
Prelp	0.20079	0.356861	0.421902	0.71576	0.589244	0	0.00104236	0.00866555	0.000726158	0.0068455	0.00402765	0.00509178	0.0207387	0	0.00735313	0.140521	0.0563452	0.059093	0.037276	0.0147051	0.0826138	0.438944	0.507847	0.520227	0.552077	0.00772606	0.00629918	0.00947582	0.00258747	0.00526128	0.032953	0.0221444	0.0175937	0	0.0245897	0.357009	0.436257	0.941634	0.584702	0.794633	0.0603043	0.155955	0.425179	0.181018	0.273916	0.136332	0.446516	1.15894	0.848646
Gm1627	0	0	0	0	0.000783546	0	0	0	0	0	0	0	0	0	0	0	0	0	0	0	0	0	0	0	0	0	0	0	0	0	0	0	0	0	0	0	0	0	0.00451676	0.00196801	0.000384765	0.00403546	0	0	0	0	0.00115346	0	0
Fmod	0.157566	0.301301	0.373857	0.271025	0.215875	0.00483019	0.00408076	0.000967305	0.000923304	0.00156613	0.00318491	0.00406379	0.00281622	0	0.00121511	0.018913	0.0116971	0.00350628	0.00309558	0.00204085	0.223697	0.459291	0.338607	0.152192	0.204068	0	0.00241551	0.00199145	0.0013208	0	0.0055791	0.00921279	0	0	0	0.188489	0.306607	0.457101	0.232292	0.167612	0.202046	0.317036	0.431444	0.278779	0.27098	0.255778	0.453958	0.700433	0.310318
Btg2	14.2412	8.42137	8.5514	22.1742	25.729	3.11429	2.75531	2.18655	5.24388	4.63225	2.72859	3.08365	4.56744	9.11025	5.93397	10.042	6.52648	3.61901	10.4318	7.72054	15.8005	8.61831	11.9464	32.3937	27.2214	1.84316	1.90256	2.05569	4.34562	2.55603	2.71945	2.52816	2.20123	6.39823	3.43414	20.0872	11.6689	10.8136	30.3525	28.7918	15.7439	6.60851	7.31497	18.3885	18.1102	20.1402	9.77426	10.5185	31.1129
Chit1	0	0	0	0	0	0	0	0	0	0	0.000453949	0.00217783	0	0	0.00381565	0	0	0	0	0	0	0	0	0	0	0.000788812	0	0	0	0	0	0	0	0	0	0	0	0	0	0	0	0	0	0	0	0	0	0	0
Chil1	0	0	0	0	0	0	0.00139246	0	0	0	0	0.00234837	0	0	0	0	0	0	0	0.000555341	0.00189326	0	0	0	0	0	0	0	0	0	0	0	0	0	0	0	0	0	0	0	0	0	0	0	0	0	0	0	0
Mybph	0	0	0	0	0	0	0	0	0	0	0.00122047	0	0	0.00694936	0	0	0	0	0	0	0	0	0	0	0	0	0	0	0	0	0	0	0	0	0	0	0	0	0	0	0	0	0	0	0	0	0	0	0
Adora1	0.000530322	0	0	0	0.0020203	0	0.00281309	0.00189264	0.00167872	0.00191203	0.061747	0.0357199	0.0244042	0.0252577	0.0316588	0	0	0.00295019	0.00204928	0.00349464	0.00196045	0.00213409	0	0	0	0.0401292	0.00927588	0.00812755	0.0071663	0.00577488	0.0306042	0.0186681	0.00522208	0	0	0.0012983	0	0	0	0	0	0	0	0	0	0	0	0	0
Myog	0	0	0	0	0	0	0	0	0	0	0	0	0	0	0	0	0	0	0.000594189	0	0	0	0	0	0	0	0	0	0	0	0	0	0	0	0	0	0	0	0	0	0	0	0	0	0	0	0	0	0
Ppfia4	0.016347	0.005413	0.00576066	0.00494985	0.00198617	0.00187175	0.00151023	0.00288387	0.00207531	0.000663169	0.00326601	0.00246224	0	0	0	0.0221457	0	0.000883532	0.00170472	0.00081601	0.0066373	0.0092686	0.00775318	0.00138222	0.00233941	0.000771697	0.00311277	0.00383035	0.000831004	0.00299946	0	0	0.0100627	0	0	0.00910832	0.00479814	0.00406561	0	0.00446265	0.0110584	0.0127436	0.00910793	0.00148896	0.00167565	0.00639884	0.00619716	0.00920812	0.00482327
Tmem183a	0.256192	0.269237	0.240763	0.253877	0.292066	0.297764	0.317394	0.303997	0.28679	0.304882	0.311188	0.351364	0.39137	0.312405	0.355986	0.214374	0.285262	0.336236	0.331855	0.331736	0.281842	0.284816	0.225986	0.267744	0.254256	0.307546	0.381278	0.333281	0.307069	0.373608	0.331922	0.405776	0.403444	0.306176	0.331964	0.257224	0.318425	0.21578	0.249828	0.238859	0.276507	0.290618	0.285509	0.257562	0.302385	0.287535	0.309408	0.265284	0.249478
4933406M09Rik	0	0	0	0	0	0	0	0.00119155	0	0	0	0	0	0	0	0	0	0.000646745	0	0	0.00219785	0	0	0	0	0	0	0	0	0	0	0	0	0	0	0	0	0	0	0	0	0.00207941	0	0	0	0	0	0	0
Cyb5r1	0.0473634	0.0965698	0.0682583	0.0475378	0.0459569	0.040469	0.0721813	0.0521955	0.0432903	0.0566827	0.0726709	0.10148	0.124934	0.069512	0.079469	0.100405	0.0664208	0.0784167	0.0526852	0.049825	0.0505428	0.0662016	0.114242	0.0654533	0.0537458	0.0846044	0.0755678	0.0941178	0.0650271	0.0474002	0.0763438	0.101846	0.106541	0.0379426	0.0731692	0.0587653	0.0705954	0.0722612	0.0798538	0.0530024	0.0753487	0.100586	0.10568	0.064077	0.0593684	0.0629688	0.0260983	0.0796681	0.0359848
Adipor1	0.461334	0.359571	0.340198	0.372894	0.379091	0.725261	0.530035	0.585358	0.722207	0.716481	0.665581	0.560081	0.538317	0.67257	0.676769	0.733472	0.6976	0.581981	0.715374	0.730157	0.446452	0.340794	0.341354	0.419542	0.412631	0.586807	0.496034	0.549363	0.640981	0.602951	0.396354	0.408185	0.351518	0.316455	0.277526	0.495463	0.342667	0.284819	0.442765	0.369632	0.455964	0.362028	0.350289	0.419675	0.447499	0.441341	0.343042	0.294617	0.437168
Platr1	0	0	0.00145946	0.000957688	0	0.00177642	0	0.00126929	0.00132193	0.000667468	0.00120495	0	0	0	0	0	0	0.00304005	0.00354741	0.00310967	0	0.00463659	0.00437253	0	0	0.00197025	0.00489975	0.00344704	0	0	0	0	0	0	0.00722843	0.0011344	0.00190137	0.00321156	0	0	0.0030077	0	0	0	0	0	0	0	0
Klhl12	0.167178	0.1445	0.142743	0.120035	0.114814	0.346377	0.275904	0.257132	0.236063	0.230176	0.339097	0.403948	0.460287	0.298977	0.352669	0.323542	0.441534	0.232075	0.206364	0.202732	0.168152	0.21314	0.147518	0.163983	0.143118	0.276643	0.283015	0.263766	0.211833	0.234609	0.739813	0.737388	0.568558	0.350404	0.351939	0.142703	0.17593	0.19414	0.13026	0.159369	0.142913	0.175843	0.147932	0.135303	0.163257	0.196354	0.173807	0.206152	0.187787
Rabif	0.0937097	0.051327	0.0899707	0.0846449	0.102518	0.135644	0.1535	0.150738	0.137913	0.164752	0.119782	0.0971176	0.0994719	0.081332	0.138357	0.112011	0.0688115	0.157819	0.128218	0.149441	0.105715	0.070264	0.0769991	0.0586102	0.105141	0.119529	0.140339	0.17415	0.129076	0.156486	0.0448956	0.0488588	0.04342	0.042938	0.0981586	0.0623487	0.0915329	0.054158	0.107595	0.133217	0.095432	0.0796437	0.108748	0.115437	0.142284	0.0851875	0.0839914	0.0567025	0.0879823
Mgat4e	0	0	0	0	0.000265824	0	0	0	0	0	0	0	0	0	0	0	0	0	0	0	0	0	0	0.00531629	0	0	0	0	0	0.00110654	0	0	0	0	0	0	0	0	0	0	0	0.00109176	0	0	0	0	0	0	0
Kdm5b	1.34336	1.2312	1.26704	1.06658	0.869597	2.06816	1.46222	1.49715	1.45069	1.49274	2.74505	2.59689	2.18603	2.03462	1.8278	1.9743	1.78509	1.58417	1.52471	1.33888	1.57592	1.50204	1.68623	1.38757	0.964903	1.58946	1.02674	0.764171	0.810749	0.785086	1.71902	1.88937	1.33075	1.17858	0.988918	1.46296	1.67523	1.41607	1.17738	0.851285	1.20653	1.30132	1.32187	1.23109	1.03536	1.42571	1.33767	1.43919	1.23561
Gm26783	0	0	0.00208679	0	0	0	0	0	0	0	0	0	0	0	0	0	0	0	0	0	0	0	0	0	0	0	0	0	0	0	0	0	0	0	0	0	0	0	0	0	0	0	0	0	0	0	0	0	0.00261328
Syt2	0.0599524	0.0442867	0.0478467	0.0153309	0.015435	0.0238669	0.00262305	0.00182264	0.00646254	0.00304443	0.0167707	0.0183875	0.0157125	0.00629333	0.0134902	0.037955	0.0153223	0.00377882	0.0102328	0.00326847	0.0166742	0.0125493	0.0108424	0.0102718	0.00128621	0.0211711	0.00966197	0.00755082	0.00614002	0.00569363	0.0508545	0.0251089	0.0134952	0.0112091	0.0256251	0.0117834	0.0140602	0.0158079	0.0107742	0.00575026	0.0176639	0.0150658	0.0185638	0.0048519	0.00266712	0.0145056	0.00772991	0.0186391	0.0131249
Ppp1r12b	2.34132	1.65215	1.83115	1.98252	2.17747	0.166813	0.128542	0.13872	0.179923	0.175606	0.154473	0.199294	0.195979	0.153929	0.137476	0.262954	0.168176	0.192265	0.350163	0.306569	0.543718	0.485234	0.28855	0.392659	0.429939	0.140009	0.156016	0.158112	0.133256	0.129089	0.41312	0.516326	0.443121	0.355898	0.397933	0.380113	0.30959	0.333161	0.528288	0.478072	0.449328	0.256774	0.248048	0.321424	0.322692	0.605966	0.41949	0.41901	0.557289
Gm28892	0	0	0	0	0	0	0	0	0.00209066	0	0.00104088	0	0	0	0	0	0	0	0	0	0	0	0	0.00270594	0	0	0	0.00168056	0	0	0	0	0	0	0	0	0	0	0	0	0	0	0	0	0.000650839	0	0	0	0
Ube2t	0.02275	0.014065	0.0164952	0.0100995	0.00683845	0.0303719	0.0163631	0.0113907	0.0222993	0.0255509	0.0183467	0.0176415	0.0107743	0.00940603	0.0263052	0	0.0184764	0.0121032	0.0324639	0.0287828	0.00592003	0.00665619	0.0153283	0.0119137	0.00708157	0.113456	0.0679158	0.0715898	0.127008	0.11995	0.0301703	0.0329383	0.0224995	0.0344274	0.0509037	0.0129494	0.010414	0.0120621	0.0284819	0.00277596	0.0140224	0.00158124	0.00356659	0.00958485	0.00984641	0.0158404	0.0145203	0.00352097	0.0181897
Lgr6	0.273037	0.30942	0.311069	0.304253	0.281279	0.00484671	0.00520302	0.108163	0.0623496	0.0355776	0.00120318	0.0038111	0.0203107	0.00963482	0.00510006	0	0.208858	0.449879	0.4004	0.271805	0.0343569	0.0763371	0.0311564	0.026046	0.0481987	0.00204996	0.00541965	0.126687	0.0483885	0.0239263	0.0208986	0.0453213	0.225373	0.214812	0.078975	0.0197993	0.0433728	0.0306739	0.095898	0.0814165	0.00905291	0.0350241	0.0331317	0.0253002	0.021637	0.0580406	0.0918638	0.0915038	0.0445811
Gm10535	0	0	0	0	0	0	0	0	0	0	0.000726587	0	0	0	0	0	0	0	0	0.00045441	0	0	0	0	0	0	0	0	0	0	0	0	0	0	0	0	0	0	0	0	0	0	0	0	0	0.00150504	0	0	0
Ptpn7	0.0016617	0	0	0	0.000812244	0.00179943	0.00104236	0.00223312	0	0	0.0040674	0.00244043	0.00151191	0.00691125	0.00157922	0	0	0.000709019	0.00408045	0.00117937	0	0	0	0	0	0.00505872	0.0008327	0	0.00157109	0.00136649	0.0417585	0	0	0	0	0.00206079	0	0	0	0	0	0.00333355	0	0	0	0	0	0	0
Arl8a	0.431348	0.295091	0.402919	0.397133	0.447833	0.395491	0.160914	0.246668	0.281976	0.341733	0.402114	0.262315	0.29581	0.334018	0.301706	0.542901	0.30733	0.414132	0.448433	0.522266	0.370177	0.299203	0.364138	0.310001	0.406438	0.303602	0.135767	0.180395	0.179863	0.19937	0.300702	0.180689	0.254573	0.15966	0.210642	0.386413	0.239564	0.273796	0.424216	0.406216	0.373752	0.206497	0.253302	0.26081	0.363971	0.391698	0.296822	0.368201	0.400653
Gm15445	0.00372581	0.00704143	0.00198639	0.00786967	0.00123878	0	0.00346279	0.00347491	0.0081129	0.00330192	0.00327765	0.00418849	0.00184576	0.0100872	0	0	0.0343939	0.00267606	0.0116061	0.00298307	0	0	0	0.00293474	0.00421006	0.0021424	0.00543163	0.000590159	0	0.00173111	0.0332552	0.00612269	0	0.0233643	0.0105198	0.00164935	0.00267523	0	0	0	0.00704375	0	0.00065807	0	0.0107155	0.00458824	0	0.00244538	0.00187338
Gpr37l1	0	0	0	0	0	0	0	0	0.000806756	0	0	0	0.00334572	0	0	0	0	0	0	0	0	0	0	0	0	0	0	0	0	0	0	0	0	0	0	0	0	0	0	0	0	0	0	0	0.00176942	0	0	0	0
Gm26642	0	0	0	0	0	0	0	0.000647747	0	0	0	0.000820402	0	0	0.00131459	0	0	0	0	0	0	0	0	0	0	0	0	0.000727192	0.00130264	0.000991936	0	0	0	0	0	0	0	0	0	0	0	0	0	0	0	0	0	0	0
Elf3	0.00111168	0.000680901	0.00713808	0	0.00163036	0.0425811	0.0429945	0.0805999	0.0414028	0.0386808	0.0318283	0.0355707	0.0825156	0.0447328	0.038361	0	0	0.0339976	0.0204963	0.0246511	0.00183145	0	0	0	0	0.0348722	0.0417089	0.244093	0.133638	0.0901245	0	0.0159403	0.0649669	0	0.0398021	0.00145481	0	0	0	0	0.000800093	0.00433673	0.00324317	0	0.000926174	0	0	0.00789458	0
Rnpep	0.31373	0.1309	0.219072	0.18546	0.231679	0.395059	0.326216	0.790268	0.634265	0.672602	0.305893	0.266633	0.377284	0.305972	0.328304	0.222785	0.29758	0.47383	0.403165	0.5411	0.21655	0.154391	0.187223	0.146504	0.203258	0.37069	0.38387	0.681615	0.659923	0.615701	0.431441	0.594328	0.603292	0.349363	0.30963	0.202697	0.153819	0.221151	0.139047	0.202526	0.225153	0.13629	0.136687	0.168881	0.178849	0.191025	0.148355	0.183912	0.134587
Timm17a	0.740706	0.682646	0.651283	0.796045	0.912913	0.854831	0.742639	0.760962	0.998725	1.00733	0.880065	0.771731	0.737326	0.911368	0.994261	0.890687	0.650378	0.756284	0.870432	1.01562	0.662616	0.616644	0.572084	0.692808	0.721463	0.945307	0.815689	0.878048	0.998215	1.10698	0.465679	0.352166	0.402032	0.20175	0.681254	0.593158	0.539245	0.52192	0.521265	0.705683	0.683971	0.646461	0.706692	0.708323	0.737477	0.574268	0.471903	0.551106	0.615002
Lmod1	2.71211	3.27606	3.93452	3.96537	3.69316	0.00823167	0.00887102	0.00598139	0.00764572	0.00839531	0.0042824	0.00637835	0.00448333	0.00187743	0.0086343	0	0.00693274	0.0102992	0.0125486	0.0163049	0.0903414	0.263488	0.216216	0.204801	0.191694	0.00430709	0.00551737	0.00946571	0.00869488	0.00391615	0.0571596	0.0634951	0.0137474	0	0.0364567	0.0164408	0.02008	0.0202097	0.0926648	0.0402577	0.164485	0.168577	0.0932194	0.0987752	0.0550212	0.062559	0.0813339	0.150787	0.175045
Shisa4	0.485765	0.32106	0.352245	0.366874	0.421418	0.0750545	0.0276962	0.0405449	0.0830938	0.0859847	0.034402	0.027347	0.0379794	0.0553851	0.0273578	0.16118	0.0224707	0.15817	0.231003	0.215036	0.27628	0.243405	0.141922	0.173716	0.262729	0.0627817	0.03646	0.0391353	0.0631043	0.0478615	0.0494144	0.0500237	0.0259044	0.0499021	0.0158901	0.158374	0.148447	0.0833891	0.143418	0.132236	0.211484	0.162013	0.12387	0.178601	0.206034	0.322254	0.227014	0.289138	0.217138
Ipo9	0.266452	0.177944	0.194508	0.253068	0.27686	0.149226	0.131481	0.13212	0.177034	0.20184	0.164246	0.160882	0.143012	0.167723	0.195497	0.215349	0.0831166	0.163351	0.1801	0.240302	0.249602	0.209995	0.214652	0.259955	0.298721	0.256404	0.204579	0.191185	0.218717	0.246422	0.202589	0.244085	0.174622	0.103832	0.319811	0.214835	0.159979	0.120199	0.20143	0.216555	0.25442	0.18065	0.25376	0.235686	0.32043	0.229773	0.176702	0.186916	0.234501
Nav1	0.595469	0.474309	0.514975	0.341554	0.331499	0.312244	0.309171	0.172242	0.485374	0.452593	0.245783	0.300275	0.336596	0.306633	0.312339	0.14979	0.31595	0.28506	0.422325	0.475366	0.658084	0.702553	0.865382	0.671484	0.436873	0.284148	0.375305	0.434568	0.427277	0.452095	0.389134	0.54349	0.433007	0.48356	0.497095	0.991955	0.819042	1.04904	0.46617	0.521234	1.00616	1.04273	1.04626	0.967153	0.814854	0.57501	0.726657	0.648809	0.45379
Gm4793	0.00187717	0	0	0.00349442	0	0	0	0	0.000655072	0	0	0	0	0.00571681	0	0	0	0	0	0	0.0018616	0.00243741	0	0	0	0	0.000816468	0	0	0.00190143	0	0	0	0	0	0.00144352	0	0	0	0	0.00190264	0.00668348	0.00289811	0.00212778	0.00104922	0	0.00256874	0	0
Gm38399	0.0195662	0.0279543	0.0338967	0.02068	0.0171454	0.0291064	0.026591	0.0190299	0.034051	0.0220497	0.0086153	0.0130483	0.0345225	0.0186004	0.0127205	0.0301836	0.0300416	0.027388	0.0494432	0.0246763	0.0154513	0.0122716	0.049844	0.0259856	0.0127701	0.0176442	0.0356617	0.0375269	0.029978	0.027245	0.0307294	0.0524646	0.0604307	0.0403087	0.0636191	0.0206258	0.0220864	0.0169571	0.0356311	0.0197857	0.0231296	0.0249314	0.0402999	0.0286679	0.0175507	0.0154599	0.0128354	0.00886462	0.0187184
Csrp1	9.66699	13.4868	15.0104	13.2325	11.7396	0.127401	0.20536	0.167348	0.112292	0.116585	0.114321	0.160928	0.259249	0.165749	0.155427	0.24796	0.269671	0.542491	0.441887	0.39967	2.58634	4.12019	2.95529	2.79545	2.90057	0.132093	0.21007	0.273205	0.178812	0.188074	0.359241	0.319593	0.247535	0.171737	0.193417	3.62893	4.45364	5.60805	3.71418	4.11674	3.13162	3.00384	2.40163	2.03823	1.72114	3.2308	5.28084	4.51765	3.31265
Phlda3	0.507489	0.520426	0.635349	0.523994	0.663428	0.0215761	0.101886	0.125547	0.102854	0.116985	0.164506	0.158969	0.31057	0.182663	0.203709	0.245534	0.183634	0.426357	0.390325	0.467731	0.437457	0.953028	0.75683	0.586248	0.875742	0.165932	0.142571	0.220841	0.141638	0.153723	0.0440778	0.0563452	0.0865927	0	0.0925334	0.534189	0.847071	0.989877	0.870509	1.23435	0.393531	0.410582	0.591649	0.471184	0.654868	0.336185	0.628271	0.778178	0.458428
Tnni1	0.0481047	0.0435205	0.0610726	0.0519885	0.00215175	0.00704839	0.0111931	0.0205099	0.0070143	0.0029777	0.0622251	0.0497195	0.0955631	0.0375946	0.0401257	0.0634927	0	0.0336621	0.0290229	0.0160415	0.0207115	0.00992952	0.00626047	0.00449084	0.00161622	0.0643511	0.0502806	0.0636864	0.0360429	0.0288511	0.0290135	0.0120157	0.011342	0	0.00402113	0.0220188	0.00428343	0.0233373	0.0118515	0	0.021257	0.0135791	0.00853886	0.0121417	0.00645385	0.00453136	0.00609424	0	0.00606362
Lad1	0.00362354	0	0.00134102	0.00238086	0	0	0	0	0	0	0	0	0	0	0	0	0	0.000549257	0	0	0	0	0	0	0	0	0	0	0	0	0	0	0	0	0.0256614	0	0	0	0	0	0	0	0	0	0	0	0	0	0
Tnnt2	2.95631	1.76679	1.81518	1.22549	0.914254	0.00809927	0.0119418	0.00565537	0	0.00224547	0.0430579	0.0119169	0.00890188	0.00211175	0.022142	0	0.0136821	0.00594112	0.000558168	0.00126478	0.00720323	0.0360536	0	0.0215888	0.00321453	0.0186246	0.0127272	0.00836748	0.0016512	0.000906964	0.0559564	0.0265179	0.00447938	0	0	0.0135699	0.00437315	0	0	0.00227606	0.0754119	0.0579307	0.0526536	0.0530388	0.0246768	0.0134801	0.00939771	0.0224008	0.00381301
Pkp1	0	0	0	0	0	0	0	0	0	0	0	0	0	0	0	0	0	0	0	0	0	0	0	0	0	0	0	0	0	0	0	0	0	0	0	0	0	0	0	0	0	0	0	0	0	0	0	0	0
Igfn1	0	0	0	0	0	0	0	0.00171798	0.00281795	0.000343501	0	0.00325073	0	0	0	0.0134304	0.00979747	0	0.00108573	0.000739352	0	0	0	0	0	0	0	0	0.00111266	0.000967165	0	0	0.00569706	0	0	0	0	0	0	0	0.00150288	0	0	0	0	0	0	0	0
Tmem9	0.649536	0.476488	0.479778	0.423487	0.496732	0.716693	0.523894	0.571364	0.518015	0.719878	0.743132	0.79899	0.731927	0.676193	0.735127	1.31118	0.841839	0.652023	0.647196	0.786079	0.716037	0.671264	0.684997	0.527418	0.605396	0.580447	0.470652	0.512949	0.467374	0.46424	0.379319	0.260758	0.341634	0.464578	0.483967	0.785349	0.796727	0.729674	0.602041	0.856279	0.697024	0.599297	0.585288	0.416947	0.703202	0.799771	0.626854	0.781833	0.492464
Ascl5	0	0	0	0	0	0	0	0	0	0	0	0	0	0	0	0	0	0	0	0	0	0	0	0	0	0	0	0	0	0	0	0	0	0	0	0	0	0	0	0	0	0	0	0	0	0	0	0	0
Cacna1s	0.00110953	0.00225297	0.00198042	0	0.00112531	0.00296125	0	0.000386398	0	0	0	0.00132079	0	0	0.00294833	0	0	0.00196295	0	0.000502661	0	0	0.0028022	0.00135039	0	0.000957585	0.000938053	0.000840373	0	0.000855154	0	0	0	0	0.0101758	0.00192537	0	0	0	0	0.0674616	0.100782	0.144556	0.118274	0.10064	0	0.00267693	0	0
Gm37759	0	0	0	0	0.000112531	0	0	0	0	0	0	0	0	0	0	0	0	0	0	0	0	0	0	0	0	0	0	0	0	0	0	0	0	0	0	0	0	0	0	0	0	0.00115347	0.00126835	0	0	0	0	0	0
Kif21b	0.0083134	0.00198872	0.00549845	0.0063739	0.00156152	0	0.00235669	0.00500749	0.00527609	0.00481413	0.00496109	0.00333055	0.010775	0.00348479	0.00427803	0	0	0.00804696	0.00707429	0.00431258	0.0562029	0.0164667	0.0308676	0.014668	0.00743574	0.00351225	0.0024966	0.00481568	0.00132679	0.00633579	0.00825322	0.0182	0.00392303	0	0.0128382	0	0.00129228	0.0138108	0	0.00714353	0.1158	0.105264	0.106277	0.113438	0.0444331	0.000774419	0.0244637	0.00524414	0.00249419
Mroh3	0	0	0	0	0	0	0	0	0	0	0	0	0	0	0	0	0	0	0	0	0	0	0	0	0	0	0	0	0	0	0	0	0	0	0	0	0	0	0	0	0.00101232	0	0.00254106	0	0	0	0	0	0
5730559C18Rik	0	0	0	0	0	0	0	0	0.00108438	0.000793462	0	0	0	0	0	0.00876665	0	0.00182377	0.00114715	0	0	0	0.00227297	0	0	0	0	0	0	0	0	0	0	0	0	0.00168913	0	0	0	0	0.00831205	0.0011179	0.00240187	0	0.00137116	0	0.00345862	0	0
Gm26568	0	0	0	0	0	0	0	0	0	0	0	0	0	0	0	0	0	0	0	0	0	0	0	0	0	0	0	0	0	0	0	0	0	0	0	0	0	0	0	0	0	0	0	0	0	0	0	0	0
A430034D21Rik	0	0	0.00330417	0	0	0	0	0	0	0	0	0	0	0	0	0	0	0	0	0	0	0	0	0	0	0	0	0	0	0	0	0	0	0	0	0	0	0	0.00627964	0	0	0	0	0	0	0	0	0	0
Gm37552	0	0	0.00378317	0	0	0	0	0	0	0	0	0	0	0	0	0	0	0	0	0	0.00220796	0.00391315	0	0	0	0	0	0	0	0	0	0	0	0	0	0	0.00142946	0	0	0	0	0	0.00138341	0	0	0.000952493	0	0	0
Gm26781	0.00127046	0	0	0	0	0	0.00600817	0.00125703	0	0.000640492	0.000602586	0.00104701	0	0.0015692	0	0	0	0	0.000542598	0.000453229	0	0.0106329	0	0	0	0.000839892	0	0.0012202	0	0.000629481	0	0.0275487	0.00537656	0	0	0	0	0	0.00633502	0	0	0.00104929	0.00151507	0	0	0	0	0	0
Gpr25	0	0	0	0	0	0	0	0	0	0	0	0	0	0	0	0	0	0	0	0	0	0	0	0	0	0	0	0	0	0	0	0	0	0	0	0	0	0	0	0	0	0	0	0	0	0	0	0	0
Camsap2	0.187453	0.202979	0.21274	0.21961	0.188335	0.18317	0.154595	0.152589	0.181145	0.177557	0.209199	0.231286	0.197846	0.183838	0.253967	0.337669	0.272896	0.201621	0.236006	0.251605	0.227776	0.285971	0.253038	0.281147	0.208576	0.184425	0.191578	0.157898	0.127298	0.172016	0.259765	0.27476	0.21624	0.229785	0.100069	0.254668	0.307535	0.254528	0.27458	0.240967	0.182837	0.159647	0.179097	0.1783	0.23109	0.233051	0.206945	0.184229	0.206037
Ddx59	0.0598468	0.0211714	0.0235293	0.0377023	0.0316743	0.0485701	0.0283111	0.0324404	0.0430196	0.0413583	0.0488821	0.0420925	0.0337615	0.0288596	0.0516431	0.0510693	0.0081678	0.0270986	0.030831	0.0476545	0.049958	0.0151815	0.0372643	0.0441443	0.0304741	0.0469469	0.0338526	0.0301085	0.0479501	0.0427584	0.0334775	0.0250774	0.0139792	0.0217124	0.0205131	0.0550067	0.0197217	0.0190976	0.0521884	0.0402726	0.0491961	0.0328663	0.0256818	0.0454588	0.0374252	0.0377974	0.0350426	0	0.0276731
Kif14	0.00078567	0.00404009	0	0	0.00108409	0.00156084	0.0109432	0.00128821	0.000646539	0.000951679	0	0.00128193	0.00148529	0	0	0	0	0.00162898	0.00290728	0.000462035	0.00112785	0	0.00522409	0.00230164	0.00493398	0.00803993	0.00810441	0.00549446	0.00398157	0.00953099	0	0.0397883	0.0113164	0	0	0.00213293	0	0.0075864	0	0	0	0	0.00161183	0	0	0.00429917	0.00304805	0.00585309	0
Gm37799	0	0.00240012	0	0	0	0	0	0	0	0	0	0	0	0	0	0	0	0	0	0	0	0	0	0	0	0	0	0	0	0	0	0	0	0	0	0	0	0	0	0	0	0	0	0	0	0	0	0	0
Gm33994	0	0	0	0	0	0	0	0	0	0	0	0	0	0	0	0	0	0	0	0	0	0	0	0	0	0	0	0	0	0	0	0	0	0	0	0	0	0	0	0	0	0	0	0	0	0	0	0	0
4933409D19Rik	0	0	0	0	0	0	0	0	0	0	0	0	0	0	0	0	0	0	0	0	0	0	0	0	0	0	0	0	0	0	0	0	0	0	0	0	0	0	0	0	0	0	0	0	0	0	0	0	0
Platr23	0.00040095	0	0	0	0	0	0	0.000904223	0	0.00041841	0	0.000940462	0.00482648	0	0	0	0	0.00300482	0.00115235	0	0	0	0	0.00342258	0	0	0.00228718	0.000747777	0	0	0	0.00943425	0	0	0	0	0	0	0	0	0.00101473	0	0.00130991	0.00154944	0	0	0.00456466	0	0
Zfp281	0.376873	0.226129	0.209524	0.244762	0.250986	0.241488	0.228984	0.230222	0.296538	0.343636	0.332153	0.383831	0.42142	0.462767	0.302396	0.315221	0.460826	0.306871	0.369905	0.393718	0.269805	0.172804	0.181346	0.203117	0.241275	0.232299	0.213895	0.150825	0.221124	0.221128	0.454887	0.421671	0.375969	0.432948	0.406245	0.250253	0.173051	0.137622	0.18274	0.196338	0.216368	0.174915	0.204734	0.212671	0.217705	0.257683	0.20123	0.170759	0.224138
Gm19705	0.0142549	0.00593692	0.0139417	0.0203485	0.0144383	0.001538	0	0.00110788	0.00204531	0.000846812	0.00181205	0.00137201	0	0	0.000673879	0	0.00382628	0.00120043	0.00437283	0.00273932	0.0130784	0.00895463	0.0090748	0.0202979	0.00895503	0	0.000824979	0.00500118	0	0.00305308	0	0	0	0	0	0.00482737	0.00352648	0.0129236	0.00606834	0.00637271	0.0133297	0.000903277	0.0188865	0.0190372	0.0183228	0.0177967	0.00365591	0.0392721	0.016159
Platr22	0.00149508	0	0	0	0	0.00226668	0	0.000831997	0.000780752	0.0027245	0.0013395	0.00179407	0.00194814	0	0.00206526	0	0	0.000571638	0	0	0	0	0	0	0	0	0	0.00109154	0.00132679	0.00125096	0	0.0070938	0	0	0	0.00153363	0	0	0	0	0	0	0	0	0.00120284	0	0	0	0
Nr5a2	0.103816	0.148228	0.186677	0.0222878	0.121737	7.66999	7.62725	6.57128	6.60595	8.95422	2.86018	3.94541	2.85367	2.98951	3.74771	2.14834	3.75793	2.38008	2.34838	3.17218	0.0559725	0.143991	0.18841	0.0635945	0.165932	3.29676	4.58441	3.96164	3.82926	5.08036	3.04085	4.18344	3.21334	2.60874	3.96739	0.0666507	0.151524	0.21371	0.0490425	0.159719	0.0331499	0.0621101	0.0963872	0.0333968	0.0975358	0.0833416	0.120133	0.175587	0.0434429
Gm26979	0	0	0	0	0	0	0	0	0	0	0	0	0	0	0	0	0	0.000476443	0	0	0	0	0	0	0	0	0	0	0	0	0	0.00859255	0	0	0	0	0	0	0	0	0	0	0	0	0	0	0	0	0
Gm26936	0	0	0	0.00246387	0	0	0	0	0	0.000321203	0	0.00120184	0	0	0	0	0	0.000770448	0	0	0	0	0	0	0	0	0	0	0	0	0	0	0	0	0	0	0	0	0	0	0	0	0	0	0	0	0	0.0030432	0
A430106G13Rik	0.0171322	0.00571482	0.00433591	0.027716	0.0162897	0.0066313	0.00722169	0.0224964	0.0251632	0.0163785	0.00316911	0.0050779	0.00184576	0.00450298	0.0174988	0	0.0186184	0.0209684	0.0154849	0.0272476	0.00627267	0.00896045	0.00838603	0.0207037	0.0141065	0.00242638	0.00707959	0.00999562	0.0104086	0.011724	0.033229	0	0.0435722	0.00899437	0.0723006	0.0299617	0.00790436	0	0.0168761	0.0527461	0.00696764	0	0.00732504	0.0058693	0.0148442	0.0188441	0.00613296	0.00576432	0.00584925
Ptprc	0.00190229	0	0.00196858	0	0.00165249	0	0	0.00254874	0	0.00116757	0	0	0	0	0	0	0	0.000668422	0.00554941	0	0.00282959	0	0	0.00162325	0.00685217	0	0	0.000590159	0	0.00228677	0	0	0	0	0	0.00236276	0	0	0.0087307	0	0	0	0	0	0	0	0	0	0
Gm28556	0	0	0	0	0	0	0	0	0	0	0	0	0	0	0	0	0	0	0	0	0	0	0	0	0	0	0	0	0	0	0	0	0	0	0	0	0	0	0	0	0	0	0	0	0	0	0	0	0
Atp6v1g3	0	0	0	0	0	0.00189957	0	0.000671501	0	0.000353432	0	0	0	0	0	0	0	0.00087661	0.000809048	0	0	0	0	0.00255549	0	0	0	0.00213363	0	0	0	0	0	0.0139028	0	0	0	0	0	0	0	0	0	0	0	0	0	0	0
Nek7	0.830107	0.642319	0.682512	0.837339	0.798893	0.618705	0.600477	0.545449	0.589708	0.743245	0.470331	0.425692	0.444784	0.546364	0.481003	0.474703	0.645846	0.478742	0.568475	0.691257	0.589544	0.55395	0.493148	0.613136	0.615426	0.565275	0.544033	0.482484	0.523875	0.578592	0.677768	0.621355	0.3799	0.591804	0.609327	0.531056	0.527322	0.44962	0.628275	0.508253	0.419048	0.312049	0.443634	0.377963	0.417088	0.547715	0.467234	0.521966	0.615485
Gm28501	0	0	0	0	0	0	0	0	0	0	0	0	0	0	0	0	0	0	0.00123836	0	0	0	0	0	0	0	0	0	0	0	0	0	0	0	0	0	0	0	0	0	0	0	0	0	0	0	0	0	0
Gm5833	0	0	0	0	0	0	0	0	0	0	0	0	0	0	0	0	0	0	0	0	0	0	0	0	0	0	0	0	0	0	0	0	0	0	0	0	0	0	0	0	0	0	0	0	0	0	0	0	0
Lhx9	0.315018	0.152978	0.157036	0.267986	0.287713	0.0236706	0.0127281	0.00642587	0.012416	0.00539299	0.0274238	0.00776379	0.0196184	0.0225171	0.0048406	0.0797421	0.0253299	0.00890136	0.0175769	0.0204837	0.263794	0.0927905	0.101603	0.222557	0.202	0.0202295	0.00763737	0.00299787	0.0111744	0.00213124	0.0478868	0.0162268	0.00729124	0	0.0437925	0.0280983	0.0170792	0.0228214	0.0491154	0.0564873	0.0992263	0.0602972	0.0812576	0.139053	0.125085	0.0755456	0.0359967	0.0522239	0.102324
2310009B15Rik	0.59574	0.387261	0.473368	0.556943	0.558129	0.513218	0.487446	0.479261	0.52812	0.546298	0.469582	0.443028	0.403449	0.41661	0.398828	0.360318	0.354332	0.407223	0.493453	0.413505	0.683889	0.476767	0.627127	0.66388	0.654511	0.409467	0.440901	0.439628	0.506905	0.476218	0.0951545	0.179162	0.230225	0.184802	0.219305	0.546193	0.377621	0.314095	0.430264	0.416025	0.692076	0.672782	0.712299	0.874755	0.836254	0.591789	0.471917	0.541714	0.63142
1700019P21Rik	0	0	0	0	0	0	0	0	0	0.000358102	0	0	0	0	0	0	0	0	0	0	0	0	0.00215457	0	0	0	0	0	0	0	0	0	0	0	0	0	0	0	0	0	0	0	0	0	0	0	0	0	0
Dennd1b	0.227971	0.249376	0.198248	0.250269	0.23859	0.355132	0.38389	0.256047	0.426352	0.378257	0.347803	0.384061	0.35404	0.42315	0.349295	0.405832	0.341257	0.343294	0.523141	0.47169	0.332765	0.289223	0.440859	0.477539	0.400122	0.33178	0.32544	0.299015	0.332502	0.303373	0.859149	0.689122	0.706261	0.640676	0.706283	0.283301	0.275934	0.197313	0.353446	0.200757	0.240816	0.279139	0.330324	0.334749	0.292708	0.259153	0.251071	0.27175	0.414222
Crb1	0.00639431	0.00132686	0.0035563	0.00228758	0.00515262	0.0329375	0.0198194	0.089188	0.0702239	0.0709311	0.00693447	0.0145191	0.0119361	0.00518791	0.0136184	0.0309759	0.0426871	0.0466922	0.0551418	0.0721894	0	0.0102222	0.00342865	0.00673746	0.00838066	0.00618398	0.00979491	0.0402031	0.0432683	0.0336769	0	0.0344425	0.0589584	0.0366558	0.0624087	0	0	0.00990433	0.00640087	0	0.00139152	0.00362738	0.00371415	0	0.00242517	0	0	0.0116811	0
4933436E23Rik	0	0	0.00121958	0	0	0	0	0	0	0	0	0	0	0	0	0	0	0	0	0	0	0	0	0	0	0	0	0	0	0	0	0	0	0	0	0	0	0	0	0	0	0	0	0	0	0	0	0	0
Gm34816	0	0	0	0	0	0	0	0	0	0	0	0	0	0	0	0	0	0	0	0	0	0	0	0	0	0	0	0	0	0	0	0	0	0	0	0	0	0	0	0	0	0	0	0	0	0	0	0	0
Zbtb41	0.267376	0.251206	0.261963	0.360063	0.372496	0.201882	0.182763	0.149695	0.22187	0.207194	0.172401	0.185824	0.136391	0.16643	0.178749	0.127889	0.138946	0.175153	0.251214	0.220507	0.526688	0.465957	0.373785	0.427112	0.462479	0.16633	0.179833	0.165271	0.201325	0.211548	0.284285	0.178659	0.224305	0.161417	0.162549	0.335914	0.273537	0.238883	0.358341	0.347843	0.417151	0.402868	0.480545	0.484331	0.61802	0.401109	0.264616	0.316477	0.377067
Aspm	0.0292055	0.0274942	0.0397129	0.0274353	0.00846412	0.0122759	0.0265773	0.0150265	0.0242178	0.0142867	0.00842848	0.00862564	0.0121591	0.00772241	0.00757126	0.0375394	0.0103124	0.01557	0.0137873	0.0101176	0.101317	0.0601173	0.073686	0.0234939	0.0234362	0.033616	0.0501224	0.0513399	0.0485206	0.0401665	0.154463	0.0564828	0.057717	0.0314321	0.013685	0.0918502	0.0142083	0.0613799	0.0205622	0.0179198	0.0999041	0.0766514	0.110171	0.0583478	0.070277	0.0561835	0.0321472	0.0325789	0.0228146
F13b	0	0	0	0	0	0	0	0	0	0	0	0	0	0	0	0	0	0.000568562	0	0	0	0	0	0	0	0	0	0.000649753	0.000528839	0	0	0	0	0	0	0	0	0	0	0	0	0	0	0	0	0	0	0	0
Cfhr1	0	0	0	0	0	0	0	0	0	0	0	0	0	0	0	0	0	0	0	0.000598721	0	0	0.0075606	0.00422634	0.00115698	0	0	0	0	0	0	0	0	0	0	0	0	0	0	0	0	0.00128465	0.00160591	0.00150632	0.00111042	0	0	0	0
Gm4788	0.00979231	0.013508	0.0250629	0.0026329	0.0130374	0	0.00157911	0.00365226	0.00180044	0.00547038	0	0	0	0	0.00250485	0	0	0.00517248	0.00667119	0.00516172	0.00426	0.0474879	0.0184129	0.00865225	0.00233309	0	0	0.00101823	0.00192489	0.00157647	0.0138806	0	0	0	0.00563541	0.010911	0.0186511	0.0236615	0	0.00311297	0.00810766	0.0174802	0.00603651	0.0134499	0.00341631	0.00769694	0.0225661	0.0196488	0.00499938
Cfhr2	0.0015414	0.0109873	0.00536375	0.00603651	0.00565061	0.00180298	0	0	0.00241139	0.00141512	0.00358239	0	0	0	0	0	0	0.00402651	0.00892838	0.0121759	0.011477	0	0.0030363	0.00836669	0.00911828	0.0010772	0	0.000825731	0.00123412	0.00218691	0.00626902	0	0	0.0287644	0.0192314	0.0150126	0.0128447	0	0.00849978	0.00700341	0.00818075	0	0.00385371	0.00315209	0.00787993	0.00944874	0.0145173	0.00703876	0.0088391
Cfh	17.6859	13.9721	14.8478	19.887	18.296	1.74142	1.16929	3.48793	5.14816	4.4382	1.06233	0.799109	0.985542	1.30225	1.0789	3.15622	3.46737	8.82387	12.5383	13.0279	34.6553	28.6282	26.0526	34.5618	31.5665	0.924616	0.620025	0.91901	1.38513	1.1609	2.91213	2.15627	6.89642	5.22106	7.51039	22.77	15.6653	16.9714	22.8943	22.8596	18.9025	12.9151	11.7565	14.7913	14.7623	33.4751	22.4052	23.0665	29.1261
Kcnt2	0.2895	0.322331	0.381319	0.748994	0.627352	0.106069	0.0969434	0.126998	0.237005	0.215287	0.0600813	0.0177937	0.0222814	0.0172409	0.0347887	0.0962518	0.0321094	0.114561	0.135048	0.169603	0.650666	0.500098	0.536111	0.98052	0.864603	0.0853087	0.045221	0.0472976	0.122432	0.106478	0.112783	0.146692	0.208394	0.325483	0.314669	0.263935	0.27322	0.242598	0.761136	0.489766	0.360099	0.251199	0.318531	0.653009	0.508118	0.587316	0.476067	0.572367	1.13874
4930590L20Rik	0	0.0014937	0.00233141	0	0.00106307	0	0	0	0	0	0	0	0	0	0	0	0	0	0.000444057	0	0	0	0	0.00204605	0	0.000720405	0	0	0	0	0	0	0	0	0	0	0	0	0	0	0	0	0	0	0.00120258	0	0.00232191	0.00219346	0.00391314
Cdc73	0.413059	0.463088	0.373497	0.475011	0.37938	0.842103	0.527097	0.554936	0.879847	0.89801	0.59274	0.581312	0.515694	0.474735	0.563223	0.652912	0.564546	0.683229	0.827605	0.882718	0.492478	0.329815	0.433094	0.520689	0.445923	0.652546	0.523261	0.505149	0.574448	0.633196	0.731267	0.632785	0.67793	0.940829	0.554206	0.470992	0.422585	0.504085	0.379411	0.440578	0.369463	0.414333	0.427662	0.464475	0.388275	0.425914	0.423338	0.375857	0.470534
B3galt2	0.00166074	0.0100537	0.00214272	0.0110102	0.0113526	0.0289083	0.0559854	0.0693406	0.0729885	0.117931	0.00781447	0.0149107	0.0228556	0.00927491	0.0183118	0.062486	0.0518431	0.0502936	0.0254214	0.0823911	0.00156816	0.00703318	0.00709934	0.0097872	0.00801809	0.00732593	0.033508	0.0419173	0.0553938	0.0382353	0.134031	0.380117	0.214328	0	0.252782	0.0107045	0.0176636	0.00276687	0.0135532	0.0161586	0.0016962	0.00819143	0.00919173	0.00255985	0.00514014	0.00142813	0.0147463	0	0.000915929
Glrx2	0.822621	0.716398	0.670047	0.894174	0.889211	0.647794	0.668435	0.821181	0.849231	0.86963	0.59259	0.603463	0.524241	0.647206	0.671918	0.570411	0.856041	0.874922	0.861984	0.915888	0.601362	0.624113	0.459631	0.530195	0.680182	0.611189	0.674903	0.690489	0.818151	0.744834	0.187026	0.490623	0.387053	0.265843	0.464034	0.61676	0.554482	0.439192	0.486164	0.635855	0.593897	0.585982	0.555472	0.61121	0.643067	0.575045	0.573455	0.454204	0.558823
Trove2	0.507024	0.34608	0.319844	0.515248	0.537349	0.28222	0.209375	0.24719	0.324938	0.363268	0.243278	0.183992	0.223423	0.260744	0.248369	0.304439	0.275664	0.373161	0.449427	0.485752	0.394819	0.30065	0.300947	0.521549	0.474133	0.204482	0.151004	0.172813	0.206383	0.256204	0.226415	0.183735	0.162544	0.307353	0.243237	0.420809	0.35883	0.245228	0.374949	0.452358	0.359678	0.245034	0.263587	0.340366	0.301603	0.396794	0.267146	0.316997	0.435128
Uchl5	0.20242	0.205085	0.175363	0.19238	0.239765	0.275412	0.359765	0.275562	0.313559	0.271454	0.247121	0.292496	0.240347	0.261132	0.258598	0.240536	0.363402	0.308937	0.312897	0.378793	0.187592	0.191857	0.175796	0.184717	0.203917	0.465493	0.453212	0.473461	0.476952	0.433746	0.169674	0.108696	0.0749677	0.14208	0.217346	0.184767	0.189605	0.13678	0.225813	0.214752	0.206689	0.201407	0.199761	0.161123	0.21811	0.179913	0.153817	0.180617	0.108573
Rgs2	4.68322	4.48949	5.12961	3.58119	8.59203	6.62112	7.51331	8.74289	6.00949	6.62703	4.23789	5.32946	5.2877	3.76806	7.50663	5.16263	5.19441	5.61225	5.32607	6.46771	3.74275	2.90344	3.62764	3.90564	5.48277	5.0586	8.23631	9.94577	7.57413	8.51728	2.26039	3.22983	4.30036	3.14818	3.32788	4.65755	6.20252	6.25647	4.56593	7.60316	3.93291	3.07346	3.44858	3.02339	3.32371	5.4969	6.3183	6.29741	7.14575
Rgs13	0.0197453	0.00107726	0.0125542	0.0379529	0.0190802	0.078932	0.135677	0.307813	0.45746	0.536788	0.00665299	0	0.00529753	0.00315005	0.0102777	0.011576	0.086727	0.164387	0.243245	0.314403	0	0.00267137	0.00509803	0	0.00537592	0.0253199	0.041046	0.0785014	0.120528	0.113784	0.006983	0.00753653	0.0381043	0.0598921	0.156749	0	0.00349019	0.00882286	0.019727	0.0176125	0	0.00244064	0.00417565	0	0.00126673	0.00196802	0.00329333	0	0.00459255
Rgs1	0.0114137	0	0.00248451	0	0.000951541	0	0	0	0	0.000498405	0	0	0	0	0.00100116	0	0	0	0.0143371	0.00375701	0.00123369	0	0.00255436	0.00601694	0.00355291	0	0.00269566	0	0.0107228	0.00182941	0	0	0	0	0	0	0	0	0	0.00330563	0.00132743	0	0	0	0	0	0	0.00911195	0
Rgs21	0	0	0	0	0	0	0	0	0	0.000721917	0	0	0	0	0	0	0	0	0	0	0	0	0	0	0	0	0	0	0	0	0	0	0	0	0	0	0	0	0	0	0	0	0	0	0	0	0	0	0
Rgs18	0	0	0	0	0	0	0	0	0	0	0	0	0	0	0	0	0	0	0	0	0	0	0	0.00234286	0	0	0	0	0	0	0	0	0	0	0	0	0	0	0	0	0	0	0	0	0	0	0	0	0
Gm29514	0	0	0	0	0	0	0	0	0	0	0	0	0	0	0	0	0	0	0	0	0	0	0	0	0	0	0	0	0	0	0	0	0	0	0	0	0	0	0	0	0	0	0	0	0	0	0	0	0
Brinp3	0	0	0	0	0	0.00232982	0	0.000672418	0	0	0	0	0	0	0	0	0	0	0	0	0	0	0	0	0	0	0	0	0	0	0	0	0	0	0	0	0	0	0	0	0	0	0	0	0	0	0.000922405	0	0
Gm15584	0	0	0	0	0	0	0	0	0	0.000762718	0	0.000845762	0	0	0	0	0	0	0	0	0	0	0	0	0	0	0	0	0	0	0	0	0	0	0	0	0	0	0	0	0	0	0	0	0	0	0	0	0
Gm29515	0	0	0	0	0	0	0	0	0	0	0	0	0	0	0	0	0	0	0	0	0	0	0	0	0	0	0	0	0	0	0	0	0	0	0	0	0	0	0	0	0	0	0	0	0	0	0	0	0
Gm29020	0	0	0	0	0	0	0	0	0	0	0	0	0	0	0	0	0	0	0	0	0	0	0	0	0	0	0	0	0	0	0	0	0	0	0	0	0	0	0	0	0	0	0	0	0	0	0	0	0
Gm29398	0	0	0	0	0	0	0	0	0	0	0	0	0	0	0	0	0	0	0	0	0	0	0	0	0	0	0	0	0	0	0	0	0	0	0	0	0	0	0	0	0	0	0	0	0	0	0	0	0
Pla2g4a	0.170761	0.12724	0.0754323	0.117875	0.113996	0.267581	0.236373	0.26321	0.27975	0.230521	0.396991	0.259501	0.248447	0.233538	0.243557	0.122856	0.206462	0.200189	0.220094	0.181626	0.273921	0.155646	0.168695	0.266065	0.17754	0.478089	0.351171	0.399674	0.439649	0.387389	0.30464	0.227889	0.147227	0.166231	0.245545	0.407526	0.365098	0.402283	0.386494	0.374778	0.265062	0.165014	0.148013	0.210516	0.145423	0.225766	0.123516	0.200897	0.168066
Ptgs2	0.00628789	0.0181258	0.0936782	0.0225086	0.0390019	0.0217744	0.00324579	0.000449507	0.000614125	0.00152112	0.00519303	0.00276327	0.00256538	0.00721008	0.00856647	0	0	0.00951694	0.0175469	0.0150067	0.0155969	0.00468711	0.00921764	0.093486	0.0205604	0.00391672	0.000717385	0	0.00959466	0.00158559	0.00625175	0	0	0	0	0.0474806	0.0602575	0.0682509	0.0177721	0.0220316	0.0182955	0.014596	0.0122694	0.0534911	0.0279262	0.0340753	0.0690981	0.0691937	0.0986502
Ptgs2os2	0	0	0	0	0	0	0	0	0	0	0	0	0	0	0	0	0	0	0	0	0	0	0	0	0.00193545	0	0	0	0	0	0	0	0	0	0	0.00241737	0	0	0	0	0	0	0	0	0	0	0	0	0
Pdc	0	0	0	0	0	0	0	0	0	0	0	0	0	0	0	0	0	0	0	0	0	0	0	0	0	0	0	0	0	0	0	0	0	0	0	0	0	0	0	0	0.00161304	0	0	0	0	0	0	0	0
2310030A07Rik	0.000977623	0	0	0	0	0	0	0	0	0	0	0	0	0	0	0	0	0	0	0.000961234	0	0	0	0	0	0	0	0	0	0	0	0	0	0	0	0	0	0	0	0	0	0	0	0	0	0	0	0	0
BC003331	0.399133	0.447347	0.415222	0.384994	0.405289	0.3402	0.406397	0.486801	0.450925	0.504922	0.340239	0.431697	0.451742	0.326715	0.464675	0.422531	0.423897	0.45767	0.440494	0.442271	0.452527	0.52699	0.401704	0.463494	0.449112	0.321564	0.400093	0.381135	0.399314	0.407965	0.253926	0.247044	0.345511	0.246141	0.263396	0.437742	0.407424	0.498562	0.455462	0.410966	0.446031	0.373226	0.46883	0.421083	0.450127	0.45179	0.423586	0.373724	0.496183
Tpr	2.2248	2.08267	1.79353	2.01026	2.08499	3.02343	2.85057	2.6347	2.93099	3.29085	3.43409	3.42231	3.14326	3.34281	3.59475	2.93443	2.9315	2.59517	2.95739	3.21402	2.10394	2.09677	1.78445	1.98548	2.18238	3.57422	3.31357	3.00116	3.32317	3.864	3.23475	3.74808	2.93495	1.80026	3.02628	2.39538	2.33714	2.04992	2.21312	2.20851	2.29637	2.17239	2.05501	2.12887	2.19513	2.27669	2.2267	1.76474	2.12477
Prg4	0.0217538	0.00263631	0.0185087	0.00556981	0.00577898	0.00242773	0.0103493	0.0873706	0.0479078	0.0259788	0.00395791	0.00248457	0.00469466	0.0105488	0	0.013749	0.039076	0.707075	0.312271	0.229341	0.0318034	0.00418203	0.00667778	0.0171091	0.00790122	0.00993542	0.00424948	0.0336203	0.0140345	0.0111732	0.00523322	0.0315144	0.307986	0.0503287	0.0801549	0.0121059	0.00476688	0.0747037	0.0314747	0.02385	0.00617872	0.00285288	0.00142958	0.00398407	0.000820291	0.0469261	0.00854943	0.0142602	0.00828205
Hmcn1	0.19081	0.173868	0.104966	0.038188	0.0376535	0.01248	0.0398543	0.0179635	0.00959626	0.00797591	0.0101447	0.00997719	0.00687847	0.012217	0.00235014	0.0809584	0.0169845	0.0403321	0.0217348	0.0200915	0.257208	0.114026	0.0226176	0.0246206	0.0272545	0.0142863	0.0141002	0.00640311	0.000621453	0.0034902	0.0801947	0.152081	0.0865773	0	0.0341036	1.03895	0.493529	0.390803	0.277226	0.200289	0.251272	0.087114	0.062146	0.0241414	0.0646654	0.436929	0.187563	0.081075	0.0259675
Gm20631	0	0	0	0	0	0	0	0	0	0	0	0	0	0	0	0	0	0	0	0	0	0	0	0	0	0	0	0	0	0	0	0	0	0	0	0	0.00512993	0	0	0	0	0	0.00198358	0	0	0.00132052	0.0105675	0	0
Gm29188	0	0	0	0	0	0	0	0	0	0	0	0	0	0	0	0	0	0	0	0	0	0	0	0	0	0	0	0	0	0	0	0	0	0	0	0	0	0	0	0	0	0	0	0	0	0	0	0	0
C730036E19Rik	0	0	0	0	0	0	0	0	0.00054851	0	0	0	0	0	0	0	0	0	0	0	0	0	0	0	0	0	0	0	0	0	0	0	0	0	0	0	0	0	0	0	0	0	0	0	0	0	0	0	0
Gm47985	0	0	0	0	0	0	0	0	0	0.000588062	0	0	0	0	0	0	0	0	0	0	0	0	0	0	0	0	0	0	0	0.000523534	0	0	0	0	0	0	0	0	0	0	0	0	0	0	0	0	0	0	0
Gm8947	0	0	0	0	0	0	0	0	0	0	0	0	0	0	0	0	0	0	0	0	0	0	0	0	0	0	0	0	0	0	0	0	0	0	0.00935444	0	0	0	0	0	0.00169379	0	0	0	0	0	0	0	0
Gm47995	0	0	0	0	0	0	0	0	0	0	0	0	0	0	0	0	0	0	0	0	0	0	0	0	0	0	0	0	0	0	0	0	0	0	0	0	0	0	0	0	0	0	0	0	0	0	0	0	0
3110040M04Rik	0	0	0	0	0	0	0	0	0	0	0	0	0	0	0	0	0	0	0	0	0	0	0	0	0	0	0	0	0	0	0	0	0	0	0	0	0	0	0	0	0	0	0	0	0	0	0	0	0
Gm47996	0	0	0	0	0	0	0	0	0	0	0	0	0	0	0	0	0	0	0	0	0	0	0	0	0	0	0	0	0	0	0	0	0	0	0	0	0	0	0	0	0	0	0	0	0	0	0	0	0
Gm10138	0.0408992	0.0572241	0.0616056	0.0248567	0.0312803	0.215955	0.384035	0.786481	0.623738	0.511716	0.174482	0.267796	0.216187	0.158553	0.278836	0.160837	0.211123	0.448649	0.324876	0.364623	0.0528047	0.0468636	0.038959	0.0555199	0.0528885	0.179281	0.324852	0.500539	0.492317	0.430517	0.190625	0.588976	0.989008	0.848738	0.618052	0.0464685	0.0619031	0.121663	0.061738	0.0394394	0.0581948	0.0614003	0.0660978	0.0458613	0.0468348	0.066924	0.0536787	0.0950289	0.0628265
Ivns1abp	0.324412	0.468272	0.571416	0.234131	0.244739	2.08063	4.74738	8.19446	6.29287	6.88744	2.41861	2.87166	2.99166	2.63403	3.02893	2.11441	3.58492	6.58303	4.80286	5.47708	0.419061	0.518191	0.505531	0.3037	0.412893	2.54708	3.18814	4.03688	3.59222	3.72078	3.09303	5.94733	8.10461	8.55649	8.07005	0.595115	0.587078	0.582245	0.551097	0.436075	0.4149	0.493826	0.601201	0.445482	0.404828	0.477776	0.557307	0.485054	0.346376
Swt1	0.599733	0.42034	0.419247	0.604726	0.634699	1.10467	0.778345	0.694044	1.00556	1.00211	0.971864	0.712599	0.714638	0.998088	1.14054	1.11549	0.724536	0.609323	0.838574	1.01829	0.654372	0.493037	0.592825	0.927674	0.771532	0.721191	0.613573	0.511478	0.850912	0.775843	1.93818	1.12764	1.19169	1.17393	1.72527	0.636244	0.575263	0.69366	0.858937	0.712697	0.493484	0.424664	0.386162	0.615759	0.543954	0.529885	0.436175	0.368696	0.585891
Trmt1l	0.215219	0.101301	0.108618	0.166739	0.196657	0.343139	0.167857	0.185616	0.306114	0.340224	0.404875	0.229474	0.225318	0.300753	0.333302	0.412764	0.193202	0.196724	0.277777	0.340109	0.143562	0.128965	0.163126	0.219603	0.252089	0.299413	0.180098	0.187971	0.255658	0.271175	0.718146	0.424029	0.497131	0.431515	0.530569	0.184031	0.108401	0.156087	0.145383	0.262123	0.148042	0.0866604	0.117119	0.162376	0.163257	0.144863	0.0787962	0.109089	0.110199
Rnf2	0.310922	0.261015	0.256133	0.258995	0.305237	0.373421	0.327318	0.300896	0.368399	0.333348	0.408683	0.336008	0.383906	0.355382	0.351011	0.390739	0.28885	0.341059	0.434038	0.37617	0.369678	0.284853	0.294722	0.397238	0.36453	0.352905	0.291812	0.284765	0.290167	0.289464	0.301427	0.15253	0.203691	0.160538	0.202455	0.382075	0.2881	0.304448	0.352189	0.356246	0.330646	0.262576	0.327078	0.37372	0.375233	0.365823	0.26653	0.328541	0.399912
Gm28181	0	0	0	0	0	0	0	0	0	0	0	0	0	0	0	0	0	0	0	0	0	0	0	0	0	0	0	0	0	0	0	0	0	0	0	0	0	0	0	0	0	0	0	0	0	0	0	0	0
Fam129a	0.0154685	0.0230633	0.0229094	0.0238112	0.0102675	0.0096265	0.00291542	0.00344435	0.00702935	0.00824856	0.0261417	0.0197484	0.0361093	0.0252438	0.0104281	0.0788277	0.0203795	0.0226702	0.0435936	0.0272001	0.138796	0.111313	0.248905	0.158491	0.0942058	0.0103334	0.0112025	0.00651125	0.00722294	0.00641824	0.0834345	0.0254714	0	0.0170851	0	0.00984975	0.0167885	0.00554268	0.0364324	0.00721167	0.0257273	0.0528316	0.115071	0.105695	0.0406243	0.0727774	0.121807	0.181657	0.191621
2810414N06Rik	0.00378426	0.000738459	0.00150291	0.000463992	0.00437395	0.012531	0.00879869	0.0144818	0.0137583	0.0137208	0.0075941	0.00822188	0.00919475	0.0137195	0.0137323	0	0	0.0132102	0.013498	0.0090992	0.00541639	0	0.00231353	0.00571155	0.00450851	0.012732	0.011577	0.00499864	0.010187	0.0160103	0	0.0200749	0.0103473	0	0	0	0.00279933	0	0	0	0.00442317	0.00637411	0.00162175	0.00170949	0.00607475	0.00136629	0.00242745	0.012336	0.00951479
Edem3	0.204688	0.14623	0.176333	0.150598	0.135844	0.147652	0.158381	0.0916468	0.172806	0.204618	0.101161	0.103849	0.127095	0.134235	0.140793	0.142663	0.112207	0.154303	0.210402	0.274818	0.205769	0.137449	0.112373	0.14514	0.122955	0.0904001	0.0904131	0.0889758	0.145211	0.15943	0.157537	0.201682	0.192158	0.120202	0.230051	0.159037	0.149713	0.118324	0.135575	0.172052	0.133258	0.103222	0.1295	0.122492	0.104891	0.154734	0.173144	0.109463	0.191021
1700025G04Rik	0.35052	0.336059	0.272297	0.157036	0.231971	0.258752	0.23069	0.132537	0.137821	0.189591	0.511329	0.616492	0.568657	0.534164	0.554016	0.352836	0.403682	0.134108	0.161832	0.135498	0.453247	0.372854	0.316298	0.287096	0.366467	0.450371	0.427672	0.243908	0.232564	0.263442	0.323914	0.309026	0.188595	0.167243	0.139474	0.615813	0.721007	0.627996	0.472956	0.479573	0.382154	0.304748	0.285428	0.248279	0.275992	0.529808	0.423457	0.298049	0.271429
Gm28610	0	0	0	0	0	0	0	0	0	0	0	0	0	0	0	0	0	0	0	0	0	0	0	0	0	0	0	0	0	0	0	0	0	0	0	0	0	0	0	0	0	0	0	0	0	0	0	0	0
Tsen15	0.484128	0.402021	0.353904	0.347053	0.462029	0.484981	0.565302	0.370323	0.373449	0.441369	0.483537	0.486589	0.468002	0.333469	0.491565	0.433642	0.317372	0.302946	0.28466	0.399451	0.641204	0.378796	0.362606	0.391294	0.490122	0.69281	0.736601	0.597459	0.542984	0.634529	0.30001	0.222991	0.238365	0.154657	0.188179	0.479859	0.444733	0.509166	0.436513	0.570616	0.479057	0.360037	0.354244	0.351669	0.499797	0.592998	0.463219	0.548018	0.483091
Colgalt2	0.262923	0.131586	0.137532	0.136893	0.177355	0.125752	0.165806	0.0739065	0.0995782	0.0984809	0.0264959	0.038833	0.0345417	0.0321284	0.0369666	0.0395328	0.0541261	0.013407	0.0109974	0.0246512	0.201335	0.15602	0.0589178	0.128871	0.140495	0.037373	0.0845345	0.0636743	0.0402284	0.0513167	0.108145	0.147763	0.0688095	0.00953482	0.0720416	0.141691	0.0726664	0.113069	0.167406	0.134894	0.02475	0.0100945	0.00787122	0.036378	0.0296558	0.302202	0.196158	0.20079	0.267785
Rgl1	0.156739	0.310125	0.205617	0.210962	0.205148	0.0471011	0.150299	0.127174	0.0675414	0.0432673	0.194949	0.365997	0.369044	0.202526	0.17169	0.351613	0.327687	0.147952	0.191971	0.120962	0.232748	0.368903	0.411289	0.351424	0.353434	0.104624	0.188399	0.15755	0.0821199	0.0845533	0.257062	0.592754	0.340377	0.202803	0.0891279	0.528592	0.67251	0.674467	0.670171	0.602748	0.0960918	0.115385	0.122209	0.156154	0.189026	0.286645	0.402144	0.333874	0.343838
Apobec4	0	0	0	0	0	0	0	0	0	0	0	0	0	0	0	0	0	0	0	0	0	0	0	0	0	0	0	0	0	0	0	0	0	0	0	0	0	0	0	0	0	0	0	0	0	0	0	0	0
Arpc5	1.26531	0.849704	0.756	0.712469	0.709546	0.920666	0.864039	0.990957	1.16176	1.13582	0.891633	0.829625	0.909827	0.812621	0.802058	0.909104	0.84621	1.47734	1.55591	1.5711	0.904894	0.623714	0.817538	0.769984	0.83492	0.79543	0.884785	0.926548	0.879933	0.869915	0.486308	0.450756	0.506502	0.417668	0.538974	0.903126	0.756762	0.794446	0.740075	0.741242	0.789248	0.725295	0.763299	0.768633	0.761951	1.03696	0.789226	0.802874	0.843659
Ncf2	0.01237	0.00724259	0.00432007	0.00357594	0	0	0.00126124	0.00299551	0.00374335	0.000588651	0.00611471	0.0122275	0.0205945	0.00776743	0.00512207	0	0.007963	0.00215512	0.00218007	0.0024022	0	0	0	0	0	0.00603934	0.012866	0.0118448	0.0162784	0.0147577	0.049762	0.00859255	0.012369	0.0233025	0	0.00782321	0.00622629	0.00987547	0	0.00209694	0.00296976	0.000902328	0.00414599	0.00147483	0.00203146	0.00563404	0.00451678	0.0014158	0.00292375
Smg7	0.184979	0.358054	0.340211	0.260899	0.215347	0.238068	0.338144	0.26611	0.292206	0.254787	0.262651	0.383611	0.387277	0.373404	0.231766	0.168631	0.282824	0.269334	0.312308	0.252517	0.192703	0.367641	0.340957	0.211982	0.211435	0.267344	0.370179	0.336189	0.266535	0.258085	0.31312	0.593128	0.467293	0.356365	0.244934	0.216832	0.317918	0.242588	0.204472	0.130678	0.207255	0.331741	0.375771	0.256387	0.221488	0.224824	0.351992	0.330019	0.286167
Nmnat2	0.00377446	0.00150682	0.00346615	0.0100769	0.00289476	0	0	0	0	0.000723118	0.000647574	0	0	0	0	0	0	0	0	0	0	0	0.00291061	0	0	0.000641685	0	0	0	0	0	0	0	0	0	0	0	0.0045264	0	0	0	0.00147208	0.00281218	0.00242227	0.0015905	0.00133591	0	0	0
Gm28960	0	0	0	0	0	0	0	0	0	0	0	0	0	0	0	0	0	0	0	0	0	0	0	0	0	0	0	0	0	0	0	0	0	0	0	0	0	0	0	0	0	0	0	0	0	0	0	0	0
Lamc2	0.00952511	0.00461501	0.000462352	0.000291552	0	0	0	0	0.000531094	0.000321203	0	0.00115341	0.00512492	0	0	0	0	0.00165558	0.00292526	0.000516601	0	0	0.0046948	0	0	0	0.000794472	0.000917621	0	0	0.00628422	0	0.023269	0	0	0.00361473	0	0.00410916	0	0	0.00460907	0.00428079	0.00413298	0.00180846	0	0.00274682	0.00428986	0.00802627	0
Lamc1	0.659152	0.433286	0.414484	0.449645	0.427669	0.205848	0.124716	0.112668	0.201776	0.20969	0.198957	0.144592	0.146189	0.202408	0.15942	0.383703	0.17202	0.14393	0.23257	0.208529	0.743094	0.544745	0.481434	0.516548	0.547786	0.167535	0.10076	0.108785	0.163887	0.155671	0.246494	0.35814	0.247904	0.364077	0.262268	0.640984	0.444848	0.265886	0.48497	0.446275	0.64196	0.588708	0.587172	0.692184	0.77141	0.766044	0.503566	0.508269	0.714917
Shcbp1l	0.00121226	0	0	0	0	0	0	0.000775383	0.000743315	0.000321203	0.000749275	0.00124669	0	0	0	0	0	0	0.000600825	0	0	0.00654648	0.00420846	0	0	0	0	0	0.00076423	0.000696404	0	0	0.00511369	0	0	0	0	0	0	0	0.000929054	0.00711632	0	0.00951038	0	0.0010268	0	0	0
Dhx9	0.870682	0.712202	0.605928	0.758944	0.488881	1.53221	1.42232	1.03036	1.33227	1.18021	1.78828	1.69088	1.49848	1.60225	1.40134	1.42641	1.10675	1.05188	1.21855	1.16857	0.815491	0.688176	0.59744	0.691597	0.582852	1.97448	1.67549	1.3338	1.44637	1.41592	2.24012	2.30861	1.77051	1.36695	1.65026	0.970121	0.850283	0.779095	0.715649	0.576983	0.938931	0.856527	0.824374	0.911761	0.640921	0.878532	0.750619	0.610118	0.744175
Npl	0.0126097	0.000993761	0.00216486	0.0067954	0.0118987	0.0371058	0.00787511	0.00519657	0.0201597	0.0183512	0.0545373	0.0147328	0.0255664	0.0639653	0.0559885	0.0547156	0	0.00863347	0.0220217	0.00964581	0.0166283	0	0	0.00697977	0.013299	0.0709516	0.0100994	0.0169673	0.0272236	0.0373718	0.0425639	0	0.00339451	0	0.0463166	0.0421113	0.00961907	0.00464984	0.0185213	0.0348963	0.0272424	0.00581736	0.00474861	0.012775	0.0268122	0.0287764	0.00329927	0.00502876	0
Rgs8	0.00231671	0.0034667	0	0	0.00141162	0	0	0	0	0	0.000419405	0.000472852	0.00193431	0.00250739	0.00201938	0	0	0	0	0.000695509	0	0.00702872	0	0	0	0	0	0	0.00142045	0	0	0	0	0	0	0.00138231	0	0	0	0	0.00201597	0	0	0.0050078	0	0.00159217	0	0.00234032	0
Gm29529	0	0	0	0	0	0	0	0	0	0	0	0	0	0	0	0	0	0	0	0	0	0	0	0	0	0	0	0	0	0	0	0	0	0	0	0	0	0	0	0	0	0	0	0	0	0	0	0	0
C230024C17Rik	0	0.00145899	0	0.00097412	0	0.00174042	0.00372943	0.00420921	0.00462122	0.0069291	0.000533072	0.00078163	0	0.00354595	0.00130772	0	0	0.00107472	0.00356342	0.000481868	0.0105997	0	0	0.00171699	0.00123417	0.00309673	0	0.00215459	0	0	0.0287819	0	0.00463481	0.0139028	0	0.0060699	0	0.00872052	0	0	0.00217767	0.00119803	0	0.00236746	0.0014242	0.000571669	0.00146075	0.00463089	0
Rgs16	0.0720759	0.0619186	0.0990856	0.0700695	0.0452197	0.00993075	0.0183561	0.0130096	0.0159778	0.0208694	0.00887351	0.0266156	0.0440439	0.0335128	0.0645971	0.0139824	0.0284694	0.00984991	0.0129153	0.0197285	0.0604228	0.0584194	0.0495351	0.0336041	0.0210117	0.00598518	0.021961	0.0190225	0.024328	0.0142395	0.00905178	0	0.0512883	0.0546221	0.0253795	0.232903	0.215522	0.226573	0.152629	0.0650998	0.0193862	0.0187566	0.014183	0.0105496	0.0233027	0.0678618	0.0460008	0.0666906	0.0429894
Gm28513	0	0	0	0	0.00106554	0	0	0.00370834	0.00280913	0.00348896	0	0.00090921	0.00460732	0	0.00181751	0	0	0.000434258	0.00192864	0.00154906	0	0	0	0.00417345	0	0.00111472	0.000745999	0.00224968	0.000921321	0.00373834	0	0	0.0141922	0.0268501	0	0	0	0	0	0.00134633	0.000744811	0	0	0.00142875	0.00103411	0	0	0	0
Rnasel	0.170749	0.194852	0.260616	0.254059	0.236689	0.159134	0.147655	0.331868	0.263141	0.303672	0.243201	0.2476	0.248535	0.261591	0.291181	0.14006	0.0859326	0.232216	0.214999	0.305023	0.144426	0.147597	0.254405	0.165873	0.190676	0.140243	0.12097	0.143652	0.124417	0.164247	0.230891	0.244791	0.24208	0.402497	0.382105	0.200449	0.143824	0.359107	0.300852	0.249135	0.111778	0.0738085	0.0977445	0.170137	0.123771	0.190268	0.105124	0.157615	0.180458
Rgsl1	0.00274778	0.00329091	0.00720987	0	0.00246885	0	0.00142817	0	0	0	0	0	0	0	0.000912962	0	0	0.00109475	0	0	0	0.00947826	0	0.00174179	0.00222808	0	0	0	0	0	0	0	0	0	0	0.00563035	0	0.00665021	0	0.00245972	0.00105263	0	0.00157307	0	0.00184814	0.00438337	0.0035688	0	0
Teddm2	0.0226625	0.0163456	0.00608932	0.0285327	0.0287315	0.00471455	0	0.00859736	0.00437777	0.00593549	0.00324862	0.000943698	0	0.00476112	0	0	0.00772291	0.0206556	0.0115571	0.00933701	0.0223545	0.00568819	0.0115882	0.0343434	0.0199292	0.00500456	0.0035019	0.00165172	0.00170277	0.00438354	0.00421282	0.00597131	0.00964002	0.01897	0.0125071	0.0177916	0.0119331	0.00573752	0.0285704	0.0118157	0.0180445	0.0207717	0.0132263	0.00958626	0.0171702	0.0157363	0.0100477	0.00471427	0.00782017
Teddm1b	0	0	0	0	0.00201482	0	0	0	0	0	0	0	0	0.00273634	0	0	0	0	0	0	0	0	0	0.00106359	0	0	0	0	0	0.00152979	0	0	0	0	0.00592507	0	0	0	0	0	0.000888791	0.00139488	0	0	0	0	0	0	0
Teddm1a	0	0.0024727	0	0	0.00173915	0	0	0	0	0	0	0	0	0	0	0	0	0	0	0	0	0	0	0	0	0	0	0	0	0	0	0	0	0	0	0	0	0	0	0	0	0	0	0	0	0	0	0	0
Glul	2.33229	1.35849	1.6598	3.15665	2.9451	0.601469	0.418723	0.80326	0.827681	0.702796	0.295927	0.139391	0.131986	0.219755	0.173099	0.576897	0.548496	1.26421	1.73779	1.71209	2.50657	1.36475	1.93487	2.99738	2.30327	0.362716	0.244875	0.279736	0.357504	0.268046	0.294617	0.169072	0.400964	0.555195	0.370292	1.76773	1.25108	1.07534	1.93877	1.82871	2.10857	0.904939	0.879518	1.37877	1.0958	1.90946	1.01918	1.10465	1.545
Gm29290	0	0.00235078	0	0	0	0	0	0	0	0	0	0	0	0	0	0	0	0	0	0	0.00341475	0	0	0	0	0	0	0	0	0	0	0	0	0	0	0.00103857	0.00203414	0	0.0113789	0	0.00177954	0	0	0	0	0.00210399	0	0	0
Gm29291	0	0	0	0	0	0	0	0	0	0	0	0	0	0	0	0	0	0.00199039	0.0006155	0	0.00134435	0	0	0	0	0	0	0	0	0	0	0	0	0	0	0	0	0	0	0	0	0	0.00196533	0	0	0	0	0	0
Gm28286	0	0	0	0	0	0	0	0	0	0	0	0	0	0	0	0	0	0	0	0	0	0	0	0	0	0	0	0	0	0	0	0	0	0	0	0	0	0	0	0	0	0	0	0	0	0	0	0	0
A830008E24Rik	0.00127014	0	0.00227488	0.000626143	0.00494474	0	0.0021588	0.0131091	0.0117261	0.00796693	0.00328289	0.00324645	0	0.00246215	0.00450919	0	0	0.00289105	0.0053361	0.00543371	0.00363179	0.0042028	0.00998252	0.0111245	0.00729243	0.00899693	0.00115159	0.00428476	0.00409359	0.00487693	0.00608612	0	0.00909288	0.0124002	0	0.00605888	0	0	0	0.0027633	0.00731683	0.00613707	0.00388848	0.0074737	0.00259388	0.00588893	0	0.00178736	0
Zfp648	0	0	0	0	0	0	0	0	0	0	0	0	0	0	0	0	0	0	0	0	0	0	0	0	0	0	0	0	0	0	0	0	0	0	0	0	0	0	0	0	0	0	0	0	0	0	0	0	0
4930452N14Rik	0	0	0	0	0	0	0	0	0	0	0	0	0	0	0	0	0	0	0	0	0	0	0	0	0	0	0	0	0	0	0	0	0	0	0	0	0	0	0	0	0	0	0	0	0	0	0	0	0
4930532M18Rik	0	0	0	0	0	0	0	0	0	0	0	0	0	0	0	0	0	0	0	0	0	0	0	0	0	0	0	0	0	0	0	0	0	0	0	0	0	0	0	0	0	0	0	0	0	0	0	0	0
Cacna1e	0.00405346	0.00689927	0.00363796	0.0095018	0.000832919	0	0.00180725	0.00046567	0.00645729	0.00579801	0	0	0	0	0	0	0	0.0187497	0.0172227	0.0190832	0	0	0.00732727	0	0	0	0	0	0	0.000873944	0	0	0.0217945	0.0218662	0.0157873	0.00359726	0.0028111	0	0.00752373	0.00688456	0	0.00156771	0	0	0	0	0.0012599	0.0023618	0
Gm29282	0	0	0	0	0	0	0	0	0	0	0	0	0	0	0	0	0	0	0	0	0	0	0	0	0	0	0	0	0	0	0	0	0	0	0	0	0	0	0	0	0	0	0	0	0	0	0	0	0
Gm9530	0.0098269	0.0058861	0.00512545	0.00810529	0.00125873	0.00447956	0.0031286	0.00306597	0.00154168	0.00285342	0.00459941	0.00402141	0.00702843	0.0119912	0.00471201	0	0.0104964	0.0026587	0.00791476	0.00137628	0.00841602	0.015291	0.00538326	0.00502268	0.00474333	0.00632982	0.00650754	0.00149531	0.00621386	0.00116467	0	0	0.00786281	0	0.0207392	0.0119582	0.0149901	0.0175191	0	0.010831	0.00604253	0.0068146	0.00701856	0.00415097	0.00191222	0.005439	0.00159344	0	0.00263295
Ier5	1.7659	1.96359	1.41997	1.45119	1.44625	0.186197	0.195044	0.148173	0.278398	0.260506	0.253557	0.183544	0.196327	0.223855	0.176018	0.576831	0.179366	0.304888	0.490109	0.382296	1.49023	1.61598	2.01951	1.96826	1.79372	0.134811	0.135579	0.168851	0.17072	0.147775	0.338274	0.116787	0.231847	0.398227	0.277147	2.35833	2.38751	2.75654	3.0474	3.11297	1.07062	0.986071	0.898535	1.01044	1.13061	1.30571	1.91373	1.99382	1.8782
Mr1	0.18376	0.219605	0.181841	0.208354	0.205428	0.0695651	0.0307197	0.0546613	0.0571191	0.0855985	0.0794136	0.0708746	0.103885	0.0782949	0.0689482	0.0714182	0.0584956	0.0965106	0.102927	0.110065	0.22055	0.235627	0.241015	0.236547	0.194131	0.0294694	0.0230501	0.0382615	0.0330393	0.0410239	0.00877603	0.0537623	0.0657388	0.0112091	0.0618666	0.251416	0.262006	0.308989	0.193388	0.203977	0.248371	0.248602	0.346929	0.26409	0.282677	0.175822	0.219494	0.250566	0.177447
Stx6	0.297646	0.203544	0.164248	0.24034	0.266659	0.330254	0.184597	0.173198	0.25646	0.309205	0.355488	0.312016	0.326184	0.39581	0.388462	0.484774	0.223215	0.225503	0.324364	0.333324	0.239849	0.195525	0.139854	0.231044	0.25363	0.270138	0.206001	0.173956	0.182601	0.265276	0.495166	0.402465	0.247863	0.219828	0.526633	0.377535	0.230368	0.251945	0.312621	0.270996	0.266205	0.204521	0.221743	0.296959	0.288837	0.264205	0.256438	0.168644	0.222294
BC034090	0.17316	0.162053	0.125629	0.0899192	0.108429	0.139148	0.158903	0.0846686	0.0827346	0.0734979	0.157866	0.156693	0.194621	0.156279	0.172247	0.149645	0.0683931	0.0925303	0.100109	0.0768279	0.144367	0.14395	0.103371	0.0968785	0.0870484	0.131728	0.110256	0.166383	0.0899369	0.130568	0.373557	0.319112	0.239603	0.147156	0.134868	0.152073	0.202574	0.22672	0.0967257	0.123504	0.128396	0.145549	0.148541	0.11318	0.122828	0.145599	0.145133	0.163637	0.11378
Gm37622	0	0	0	0	0	0	0	0	0	0	0	0	0	0	0	0	0	0	0	0	0	0	0	0	0	0	0	0	0	0	0	0	0	0	0	0	0	0	0	0	0	0	0	0	0	0	0	0	0
Xpr1	0.362566	0.36409	0.295037	0.335153	0.206695	0.369149	0.335616	0.290372	0.343941	0.380924	0.4291	0.323119	0.381068	0.389256	0.40034	0.472442	0.282707	0.298917	0.464415	0.380439	0.259668	0.219047	0.25707	0.282139	0.220818	0.301573	0.26232	0.312794	0.278929	0.28876	0.690119	0.620631	0.559867	0.401438	0.703418	0.217297	0.233048	0.258566	0.341603	0.281121	0.246096	0.206063	0.20005	0.191377	0.189594	0.25581	0.250483	0.190812	0.266228
Gm5532	0.00304605	0	0.00310123	0.00718448	0.000351057	0.008623	0.00154187	0.0182335	0.0160718	0.0142083	0.018324	0.015292	0.00335829	0.00842454	0.0108349	0	0	0.00733337	0.0137666	0.00560358	0.00142789	0	0	0	0.000789436	0.0168752	0.00414006	0.0214368	0.0446126	0.0216462	0	0.00807956	0.0519333	0.00688088	0.00908149	0	0	0	0	0	0.0026742	0	0	0	0.000895417	0.00302766	0	0.00597972	0
Acbd6	0.858124	0.785621	0.888225	0.991482	0.924004	1.04816	0.98179	1.20077	1.25141	1.2701	0.969954	0.96059	0.902081	1.01854	0.922474	0.978487	0.997541	0.945212	0.965422	0.951436	0.795659	0.658599	0.916384	0.990513	0.834773	1.03069	1.10051	1.0565	1.10605	1.18193	0.382526	0.465199	0.51491	0.389358	0.564263	0.740752	0.892456	0.839455	0.799063	0.836586	0.858602	0.826904	0.887178	1.00082	0.936836	0.808498	0.648544	0.781379	0.941832
Lhx4	0	0	0	0	0	0	0	0	0	0.000668986	0	0	0	0	0	0	0	0	0	0	0	0	0	0	0	0.00092728	0.00145642	0	0.00113436	0.00182004	0	0	0.008238	0	0	0	0	0	0	0.00119213	0.000918609	0	0.0011434	0	0	0	0	0	0
Qsox1	0.996725	1.04886	1.16305	0.897066	0.575423	0.822489	0.496028	0.328955	0.434919	0.491295	0.380302	0.430154	0.58681	0.395752	0.319997	0.780144	0.673288	0.3642	0.345882	0.28715	0.890475	0.772774	0.680886	0.549377	0.477041	0.321608	0.328322	0.288771	0.225848	0.247286	0.706557	0.7998	0.558997	0.288474	0.562357	0.695374	0.691522	0.782836	0.634652	0.518535	0.475223	0.490132	0.594372	0.432927	0.391022	0.784438	0.868516	0.900971	0.672088
Gm37571	0	0	0	0	0	0	0	0	0	0	0	0	0	0	0	0	0	0.000737086	0	0	0	0	0	0	0	0	0	0	0	0	0	0	0	0	0	0	0	0	0	0	0	0	0	0	0	0	0	0	0
Cep350	0.349764	0.538	0.398649	0.366755	0.325152	0.381024	0.397348	0.322651	0.326609	0.417807	0.363276	0.516562	0.461627	0.359316	0.41121	0.502607	0.535647	0.357219	0.422202	0.436781	0.382642	0.553559	0.47028	0.559341	0.429249	0.365709	0.374496	0.339838	0.333768	0.365427	0.560892	0.694582	0.664407	0.639041	0.497739	0.492759	0.486378	0.451146	0.34043	0.404913	0.437535	0.442928	0.473548	0.302259	0.322777	0.457935	0.473362	0.409689	0.374426
Tor1aip1	0.878527	0.733369	0.638387	0.77258	0.702262	1.22613	0.901115	0.505493	0.658944	0.684383	1.44315	1.22004	1.13763	1.04796	0.936781	1.51739	0.993831	0.527139	0.674708	0.712687	0.946435	0.79762	0.950067	0.922234	0.914722	1.19498	0.845896	0.726842	0.708665	0.772774	1.25353	0.872306	0.721724	0.62276	0.633029	1.15675	1.3651	1.11011	1.05324	0.988732	0.794762	0.781731	0.862088	0.838411	0.620386	1.05171	1.05125	0.973577	1.01905
Tor1aip2	0.488887	0.466407	0.432964	0.462923	0.41452	0.928688	0.569364	0.398008	0.676448	0.760234	1.07061	0.62322	0.590575	0.797984	0.634232	0.945324	0.534186	0.443788	0.547817	0.608144	0.450411	0.411086	0.447385	0.575035	0.391642	0.903382	0.610544	0.536388	0.550704	0.584888	0.82651	0.676404	0.462078	0.482975	0.540662	0.5402	0.505023	0.41824	0.638632	0.403154	0.591222	0.502579	0.536978	0.560216	0.491346	0.623571	0.519736	0.560919	0.622692
Fam163a	0	0	0.000955725	0.00417107	0.0022636	0	0	0	0.00291097	0.00164025	0	0	0	0	0	0	0	0	0.00359171	0.00119774	0	0	0	0.00175165	0	0.000749605	0.000664474	0	0	0.00117283	0	0	0	0	0	0.00779919	0.00168306	0	0	0	0.00185426	0.00371949	0	0.0165343	0.00205083	0.00181128	0	0	0.00652913
Tdrd5	0.209923	0.231395	0.305989	0.304608	0.521707	0.861461	1.74222	5.70684	4.48414	5.49328	0.601603	0.775156	0.731263	0.702724	0.803147	1.47693	2.11561	4.22114	3.56383	4.20987	0.250199	0.233238	0.474726	0.431024	0.557866	0.517384	0.870772	2.04657	1.5199	1.46758	0.768086	0.983257	2.77702	2.03138	2.97524	0.405223	0.350217	0.518801	0.476552	0.58728	0.413266	0.286484	0.404637	0.451234	0.671309	0.163936	0.111731	0.193047	0.171481
4930518J20Rik	0	0	0	0	0	0.00146012	0.00139458	0.000541877	0	0.00129397	0.00065012	0	0	0	0.000958789	0	0	0	0.00173999	0.000403314	0	0	0	0	0	0	0	0	0	0	0	0	0	0	0	0	0	0	0	0	0	0.00108023	0	0	0	0	0	0	0
Nphs2	0	0.00193489	0	0	0.000599121	0.0122946	0.0224426	0.0246342	0.014807	0.0239883	0.0194238	0.012522	0.0207841	0.0108983	0.0169229	0	0.0486601	0.025784	0.0194619	0.0189699	0.00205229	0	0.00545373	0.00269095	0	0.0165288	0.00903457	0.0185566	0.00421572	0.00952223	0.0503997	0.0092891	0.00903425	0	0	0.0151035	0	0	0	0	0.002343	0	0	0.00335385	0.0021223	0.00847188	0	0.00416677	0.00440764
Axdnd1	0.029751	0.0195624	0.0179881	0.01509	0.00517053	0.0932642	0.0579485	0.0326223	0.0672362	0.0632863	0.0819518	0.0306202	0.0313204	0.0202262	0.0166636	0.0987723	0.031285	0.0167558	0.0369422	0.0171004	0.0311347	0.00304947	0.011161	0.00826442	0.00625043	0.071274	0.0454042	0.0497723	0.0364422	0.03545	0.277911	0.0985877	0.106137	0.0829614	0.134419	0.108135	0.0299953	0.0557695	0.0562614	0.0117721	0.0285207	0.0213766	0.0372586	0.0400337	0.00702895	0.0206638	0.0119707	0.00777566	0.0126954
Gm2000	0.645211	0.353538	0.363767	0.398684	0.722489	0.572005	0.346062	0.400244	0.36668	0.696783	0.57816	0.298767	0.275979	0.286919	0.694689	0.481744	0.482104	0.386181	0.37339	0.735025	0.728047	0.405328	0.41206	0.357917	0.802774	0.618299	0.385982	0.395089	0.41851	0.731516	0.238742	0.140282	0.126865	0.182009	0.311686	0.667089	0.337835	0.466646	0.435336	0.833079	0.841019	0.454325	0.479275	0.46798	1.02741	0.673235	0.454013	0.318859	0.365628
Soat1	1.34185	1.07597	0.82492	0.943551	0.914538	6.256	3.53171	3.02258	3.8456	4.61194	7.06555	7.11049	5.47379	5.55139	7.76002	4.02389	3.3184	2.23765	2.51255	2.50899	0.846225	0.669286	0.641482	0.879249	0.823389	4.91638	3.85446	2.45984	2.76063	3.49923	5.93452	5.6516	3.87325	2.42356	5.30493	1.86928	1.397	1.15611	1.04527	1.20639	1.26465	0.917269	1.16181	1.25016	1.09874	1.00423	0.75526	0.748318	0.861885
Gm10031	0.0173582	0.0134454	0.0284098	0.0220592	0.0327141	0.0181992	0.032967	0.0247229	0.0325293	0.048858	0.030148	0.0289441	0.0248862	0.027379	0.0438968	0	0.00947158	0.0371651	0.0401644	0.0348583	0.0197886	0.0192354	0.0212613	0.0351195	0.0616038	0.0271911	0.0241546	0.0288246	0.0414312	0.0522801	0.0100939	0.0056227	0.0181514	0	0.00805417	0.0286893	0.0223309	0.0291462	0.0192113	0.0478341	0.0180973	0.0300047	0.0266	0.0306409	0.0443748	0.0222057	0.0194261	0.0185635	0.0192588
Abl2	0.1502	0.232992	0.192791	0.184579	0.135846	0.21106	0.267644	0.226231	0.193613	0.206239	0.217946	0.264106	0.249779	0.255385	0.232596	0.202976	0.227163	0.223564	0.185087	0.22798	0.138344	0.244918	0.250722	0.212445	0.195068	0.206494	0.187451	0.20756	0.177326	0.178542	0.236364	0.462589	0.355184	0.153356	0.33824	0.202746	0.240617	0.221384	0.175194	0.16442	0.135286	0.192996	0.211347	0.217357	0.187466	0.152893	0.187087	0.208764	0.145532
Tor3a	0.0607721	0.0551547	0.0710772	0.0842456	0.119512	0.0246939	0.032654	0.0454382	0.0574827	0.0559578	0.0368094	0.0195613	0.0319102	0.0552889	0.0420819	0.0328749	0.0449296	0.0640214	0.0763985	0.0788328	0.0483291	0.0550924	0.101207	0.112347	0.121513	0.01895	0.0248898	0.0392953	0.0372021	0.0403459	0.0847789	0.222967	0.0985654	0.126423	0.0460615	0.0913194	0.137793	0.109138	0.0553098	0.163704	0.0498528	0.0582794	0.0837753	0.0690912	0.112079	0.0721188	0.068135	0.122839	0.0793805
Fam20b	0.175797	0.152542	0.0989834	0.138758	0.133172	0.212768	0.232511	0.18661	0.257892	0.289057	0.224463	0.197985	0.232326	0.346763	0.272017	0.198168	0.181125	0.162668	0.19775	0.2144	0.185246	0.132466	0.119055	0.147142	0.161242	0.237713	0.196712	0.20584	0.224577	0.258269	0.342808	0.329805	0.161081	0.106814	0.217927	0.156753	0.165267	0.147421	0.200024	0.240429	0.154675	0.123014	0.134306	0.171622	0.148797	0.152781	0.12698	0.113104	0.154739
Ralgps2	1.31093	1.41936	0.949405	0.789432	0.838997	1.22772	1.05342	0.824213	0.903576	0.93732	1.32225	1.4638	1.51388	1.38266	1.48538	1.35095	1.25767	0.614816	0.743999	0.760774	1.22952	1.04506	0.670636	0.533536	0.472812	1.18834	1.19224	1.00943	1.09401	1.09581	1.6423	1.92565	1.23853	0.999877	1.29317	0.853473	1.10675	0.856496	0.829058	0.728072	1.70068	1.11922	0.867362	1.00333	1.01587	1.0758	0.976606	0.562545	0.447634
Angptl1	0.411707	0.29736	0.225174	0.208153	0.167722	0.842322	0.86418	0.46339	0.275663	0.264785	0.431625	0.579003	0.596645	0.515209	0.459396	0.566769	0.965679	0.0789719	0.0701759	0.0679331	0.190984	0.198844	0.0816135	0.0873632	0.121062	0.340125	0.388551	0.288375	0.217095	0.193703	0.382256	0.936787	0.5846	0.017667	0.247036	0.367119	0.352832	0.299203	0.358478	0.273457	0.028897	0.0280705	0.033439	0.0242447	0.0321916	0.413591	0.386463	0.317911	0.276241
4930439D14Rik	0.00261406	0.000921913	0	0.000989825	0.000998193	0	0.00203742	0.000598148	0.000768952	0.00150386	0.00118516	0.000846612	0.00140262	0.00577045	0.0033053	0	0	0.0016917	0.00136819	0	0	0.00747635	0	0	0.000581832	0.00235906	0.00077424	0.00107483	0	0.00159083	0	0	0	0	0.00378896	0	0	0	0	0	0	0.000979932	0	0	0	0.00147026	0	0	0.00314966
Gm28694	0.00225603	0	0	0	0	0	0	0.00161006	0	0.00108354	0.000622361	0	0	0	0	0	0	0	0.000590302	0	0	0	0	0	0	0.000884289	0	0.00210372	0	0.000819479	0	0	0	0	0	0	0	0	0	0.00215608	0	0.00203026	0	0	0	0	0	0	0
Tex35	0	0	0	0.000647508	0	0	0	0	0	0.00070932	0.000300386	0	0	0	0	0	0.00982828	0.000750272	0	0.000956421	0	0	0.00414735	0	0	0.00107797	0.000732773	0	0.00111471	0	0	0	0	0	0	0	0	0	0	0	0	0.00115347	0	0	0	0	0	0	0
Rasal2	0.271683	0.231154	0.185362	0.192233	0.140234	0.30565	0.19601	0.15045	0.216178	0.264494	0.273355	0.195422	0.182301	0.19345	0.202939	0.263937	0.146235	0.123597	0.154794	0.163879	0.117571	0.0619307	0.0622851	0.153116	0.0814713	0.278413	0.21109	0.211857	0.23211	0.252597	0.417195	0.310771	0.251647	0.247139	0.232246	0.127968	0.0778465	0.147059	0.0788192	0.0809294	0.105558	0.0843184	0.091939	0.112601	0.0834962	0.134476	0.102746	0.0528185	0.117541
Cryzl2	0.154454	0.163549	0.231392	0.150413	0.128306	0.283261	0.286609	0.403255	0.330203	0.30369	0.239831	0.292332	0.373058	0.195721	0.220969	0.28803	0.335195	0.364957	0.300698	0.250262	0.204796	0.217637	0.22886	0.161884	0.157262	0.178337	0.200339	0.283709	0.243633	0.199037	0.0877232	0.122731	0.170584	0.149878	0.148835	0.108941	0.16035	0.291511	0.179065	0.163853	0.197141	0.223904	0.293697	0.205784	0.199006	0.210869	0.203261	0.302197	0.188806
Gm15486	0	0	0	0	0	0	0	0	0	0	0	0	0	0	0	0	0	0	0	0	0.00273742	0	0	0	0	0	0	0	0	0	0	0	0	0	0	0	0	0	0	0	0.00126085	0.00117646	0.00141726	0	0.000921957	0	0	0	0
Sec16b	0.0325776	0.0168454	0.0364884	0.0423598	0.0399065	0.00241415	0	0.000517721	0	0.00112842	0.002492	0.00098492	0	0	0.00181914	0	0	0.000679928	0.000892136	0.00165987	0.0678962	0.0495024	0.0574589	0.0671758	0.0667901	0	0	0.00107371	0.0012369	0.00329476	0.0052912	0.00943425	0.00229676	0	0	0.0564142	0.0176758	0.0362574	0.0228633	0.0411828	0.0880023	0.0560305	0.0871595	0.0689213	0.10375	0.0602966	0.0464129	0.0415686	0.0590991
Brinp2	0.0163951	0	0.000800235	0.0030824	0.00159284	0.00941295	0.0256916	0.00263431	0.00492427	0.00470013	0.00763873	0.0189106	0.0291586	0.00728204	0.0335704	0.0137437	0.0537877	0.00394876	0.00484729	0.0111991	0	0	0	0	0	0.00118898	0.00401004	0.00300268	0.00188843	0.0101259	0	0.0220924	0.00484973	0	0.0459469	0.00140252	0	0	0	0	0	0	0	0	0	0.00157725	0	0	0
Astn1	0.0231646	0.00276242	0.022008	0.0407717	0.017025	0.00372408	0.0116581	0.000841781	0.00428702	0.00755108	0.00147685	0	0.00253793	0.0104008	0.00446208	0	0	0.000677381	0.00119897	0.00752758	0	0	0	0	0.000652176	0.000943972	0.00447673	0	0	0.00123385	0.0131228	0.0110736	0.00499841	0	0.00413641	0	0	0.00200941	0	0	0	0	0	0	0	0	0	0	0.00220382
Gm37679	0.00363937	0	0.00428902	0.00519484	0.00139742	0	0	0	0	0	0	0	0	0	0	0	0	0.000518063	0	0	0	0	0	0	0	0	0	0	0	0	0	0	0	0	0	0	0	0	0	0	0	0	0	0	0	0	0	0	0
Pappa2	0.00138557	0.0082582	0.0116481	0.00266782	0.00768884	0	0	0	0	0	0	0	0	0	0	0	0.0108931	0.00103337	0.00296187	0.00097502	0	0.0038092	0.00843354	0.0173043	0.01701	0	0	0	0	0	0	0	0	0	0	0	0.00427922	0	0	0	0.000905078	0	0	0.00148896	0.0016658	0	0.00461028	0.00585309	0.0115544
1600012P17Rik	0	0	0	0	0	0	0	0	0	0	0	0	0	0	0	0	0	0	0	0	0	0	0	0	0	0	0	0	0	0	0	0	0	0	0	0	0	0	0	0	0	0	0	0	0	0	0	0	0
4930562F17Rik	0	0	0	0	0	0	0	0.00116321	0	0.000731208	0	0	0	0	0	0	0	0.0100636	0.00420792	0.00513153	0	0	0	0	0.000761331	0	0	0	0.00076423	0	0	0	0	0	0	0	0	0	0	0.00121964	0	0.00155396	0	0.00134477	0	0	0	0	0
Cop1	0.883063	0.99424	0.930825	1.13974	1.16496	0.618895	0.686647	1.15381	1.20659	1.13623	0.677414	0.622355	0.642899	0.693093	0.637541	0.778588	1.25306	2.03907	1.84596	1.95697	0.84059	0.916385	0.942957	1.41865	1.33987	0.588688	0.496684	0.514115	0.593647	0.604309	1.15287	0.779855	1.44164	2.1104	1.43674	0.817552	0.829843	0.829323	1.02893	1.07764	0.748815	0.635139	0.646637	0.770727	0.723362	0.904542	0.834561	0.902105	1.09089
Tnr	0.000748852	0.00695017	0.00340514	0.00640812	0.00137557	0.00255775	0	0.00280839	0.000555012	0	0	0	0.0014085	0.00185352	0.000958789	0	0.0136965	0.000879595	0.00192451	0.000597265	0.0028597	0	0.00811911	0.0170583	0.00344589	0	0	0.00116328	0.00159906	0.00205341	0.0068203	0	0	0	0	0	0	0	0.0040779	0.00604763	0.00706069	0.00594892	0.0130974	0.00545412	0.0110095	0.00276644	0	0.00226795	0.0024843
Gm38039	0	0	0	0	0	0	0	0	0	0	0	0	0	0	0	0	0	0	0	0	0	0	0	0	0	0	0	0	0	0	0	0	0	0	0	0.00152432	0	0	0	0	0	0	0	0	0	0	0	0	0
Gm37294	0	0	0	0.00073955	0	0	0.00193232	0	0	0	0	0	0	0	0	0	0	0	0	0.000979783	0	0	0	0	0	0	0	0	0	0	0	0	0	0	0	0	0	0	0	0	0	0	0	0	0	0	0	0	0
4930523C07Rik	2.1845	1.60318	1.72788	2.70512	2.18287	0.0436051	0.0648551	0.071657	0.0563262	0.0494153	0.0864457	0.146127	0.173026	0.254125	0.108541	0.147204	0.249263	0.301126	0.30219	0.209559	0.450326	0.482132	0.69611	1.31368	0.936826	0.0696813	0.0638312	0.0651859	0.10578	0.0574036	0.195775	0.213648	0.253799	0.34102	0.227494	0.329637	0.446319	0.418254	0.706449	0.497404	0.317633	0.206093	0.25115	0.366223	0.178767	0.406017	0.429656	0.401889	0.732702
4930562F07Rik	0.0161774	0.0107641	0.0106396	0.0133006	0.00728017	0	0	0	0	0	0	0.00220192	0.00454561	0	0	0	0	0.00110867	0.00152691	0	0	0	0	0.00131591	0.00344325	0	0	0.000599585	0	0	0.00729748	0	0	0	0	0.00242672	0.0035371	0.00514643	0.0182281	0	0.000795452	0	0.00160645	0.00224123	0.00113718	0.0026556	0.0021392	0	0
Tnn	0.00118531	0.00676019	0	0.00459529	0.00252343	0	0	0	0	0	0	0	0	0	0	0	0	0	0	0	0.00177866	0.00262822	0	0.00388017	0.00295762	0	0	0	0	0	0	0	0	0	0	0	0.00844866	0	0.0124865	0	0	0	0	0.00267465	0	0	0.0046564	0	0.00212693
Mrps14	0.955944	0.869802	0.796999	1.08542	1.25265	1.04794	0.999068	0.998516	1.13344	1.17724	1.06977	0.931256	0.871124	1.07453	1.15764	1.07029	0.903049	0.929009	1.13029	1.23315	0.911198	0.792535	0.714807	0.904247	1.16128	1.10153	1.0745	1.20428	1.49943	1.50135	0.429648	0.403363	0.404402	0.382118	0.417395	0.921097	0.811439	0.802108	0.936026	1.19801	1.12731	1.04753	1.0181	1.22462	1.41953	0.934118	0.766652	0.764462	0.81158
Cacybp	1.23705	1.34862	1.03993	1.16833	1.53652	1.41	1.63413	1.13182	1.38421	1.5063	1.65937	1.84426	1.59888	1.76475	1.90269	1.58663	1.49894	1.1671	1.28245	1.80495	1.13134	1.14099	0.872041	0.956125	1.5819	2.22828	2.40754	1.99389	2.39305	2.54769	0.628981	0.687668	0.630198	0.36821	0.947171	1.15055	1.25517	1.042	1.03935	1.51491	1.36319	1.42936	1.26751	1.57869	1.72865	1.19274	1.3013	0.982726	1.02169
Rabgap1l	1.10612	0.883726	0.652295	1.10112	1.04081	0.379993	0.308008	0.255468	0.386262	0.371036	0.332643	0.234744	0.307871	0.284311	0.280524	0.429729	0.198163	0.23328	0.291945	0.271902	1.13152	0.912775	0.520743	0.748148	0.875779	0.331889	0.240483	0.187964	0.289231	0.263377	0.568668	0.639491	0.217605	0.353811	0.458447	0.687686	0.618293	0.477221	0.692009	0.596198	1.06801	0.628249	0.572988	0.676424	0.729794	1.04412	0.694833	0.490449	0.592163
Gm36975	0	0	0	0.00173002	0.00101083	0	0	0	0	0	0	0	0	0	0	0	0.0109742	0.000647981	0	0	0.00268568	0	0	0	0.000978377	0	0.000883778	0	0	0.00108985	0	0	0.0321086	0	0	0.00133501	0	0	0	0	0	0	0	0	0	0.00150389	0	0.00440017	0
Gm37083	0.00213892	0	0	0	0	0	0	0	0	0	0	0	0	0	0	0	0	0	0	0	0	0	0	0	0	0	0	0	0.00151777	0	0.00623029	0	0	0	0	0	0	0	0	0.00232581	0	0	0	0	0	0	0	0	0
Gm38060	0	0	0	0	0	0	0	0	0	0	0	0	0	0	0	0	0	0	0	0	0	0	0	0	0	0	0	0	0	0	0	0	0	0	0	0	0	0	0	0	0	0	0	0	0	0	0	0	0
Rc3h1	0.508959	0.441188	0.419179	0.570212	0.461625	0.692463	0.751471	0.671947	0.716116	0.644321	0.652157	0.756068	0.608624	0.719892	0.552236	0.605476	0.864469	0.697905	0.72022	0.731576	0.412994	0.602123	0.586218	0.765803	0.551624	0.584354	0.608195	0.515643	0.616555	0.506501	1.04551	1.12741	1.11257	0.819128	0.728991	0.591008	0.628295	0.431124	0.579186	0.597609	0.420838	0.438813	0.418938	0.51508	0.415824	0.483931	0.50333	0.467379	0.635436
Serpinc1	0.0662428	0.0532037	0.0479168	0.0529339	0.0114318	0.0319033	0.085981	0.0524668	0.0587117	0.0203603	0.032096	0.011399	0.0147239	0.0187598	0.0136044	0.0957763	0.0353717	0.0736668	0.0559318	0.0380465	0.0677601	0.0451481	0.0632335	0.0427322	0.0197634	0.0340416	0.0594279	0.0656975	0.0493861	0.00447527	0.0512531	0.107989	0.147026	0.0491449	0.0423458	0.0556036	0.0678013	0.0549038	0.0413328	0.00924434	0.046335	0.0534708	0.0537387	0.0681117	0.0190028	0.0429264	0.0566613	0.0650276	0.0338994
Zbtb37	0.208619	0.13509	0.133551	0.237999	0.235573	0.120969	0.0827504	0.122198	0.165339	0.19841	0.126167	0.109905	0.144875	0.162212	0.159707	0.188557	0.0842882	0.119529	0.21681	0.214313	0.175867	0.195104	0.231716	0.344458	0.254324	0.13151	0.0903083	0.0890672	0.125553	0.125572	0.177376	0.250306	0.203116	0.279171	0.209999	0.171763	0.129361	0.106642	0.291811	0.177586	0.138788	0.0827609	0.10747	0.188001	0.163626	0.174977	0.0950942	0.174225	0.166999
Gm37362	0.00237415	0	0	0	0	0	0	0.00055202	0	0.00148771	0	0	0	0	0	0	0	0.00155188	0	0	0	0	0.00207227	0.00210532	0	0	0.000691522	0.00285538	0	0.000599178	0	0	0	0	0.0042585	0.0032429	0.0064239	0.00267964	0	0	0	0.002849	0.00104634	0	0	0.00111273	0	0	0
Dars2	0.0192742	0.0163156	0.0209283	0.0313164	0.0267309	0.0748194	0.0827881	0.0559684	0.0640197	0.0659721	0.0716147	0.0632647	0.0657433	0.0738431	0.0721202	0.0543008	0.0148717	0.0554074	0.049076	0.080613	0.0243612	0.0129721	0.012122	0.047655	0.0238174	0.121608	0.0863227	0.0905679	0.115563	0.12065	0.0552619	0.0200231	0.0541451	0.0418671	0.0501187	0.0451723	0.0361532	0.0285554	0.0250057	0.0374584	0.0395309	0.0139246	0.0259401	0.0208318	0.0486962	0.0385512	0.0313977	0.0229095	0.0326945
Gm37634	0.00373731	0.0128235	0.00964234	0.00973425	0.00232031	0.00514037	0.00370067	0.00264761	0.00665493	0.00181781	0.00227027	0.00207461	0.00221723	0.00616566	0.00401521	0	0	0.000558571	0.00159582	0.00162519	0.0039071	0.012216	0.00466247	0.00194943	0.00241767	0.00153291	0.00869061	0.00561022	0.00586874	0.00364636	0	0.00654653	0.00391057	0	0.00401298	0.00572626	0.032519	0.00729342	0.00493062	0	0.00542331	0.0064568	0.00128496	0	0.00423995	0.00716403	0.0132046	0	0.00244068
Cenpl	0.0372111	0.0636881	0.0552408	0.0389763	0.0201308	0.0143973	0.0132926	0.020014	0.0179406	0.0203753	0.0259525	0.0261133	0.0168772	0.0307347	0.0346549	0	0.0140464	0.0335111	0.0218807	0.0472361	0.0236733	0.0632681	0.0682792	0.0307884	0.0405953	0.0354686	0.032814	0.038587	0.0189988	0.0315627	0.0601461	0.0613211	0.0142528	0.0471307	0.0165112	0.0202571	0.0509048	0.0743442	0.0468516	0.0391174	0.0179002	0.026554	0.0558107	0.031332	0.0163375	0.0170686	0.022179	0.0680842	0.0629528
Klhl20	0.113152	0.0781857	0.0633219	0.0897766	0.100185	0.0673706	0.0398774	0.0651681	0.0834736	0.107597	0.0864278	0.0516815	0.0616913	0.0903879	0.0892275	0.0637058	0.10165	0.0772469	0.116713	0.109885	0.131054	0.0730058	0.0497669	0.134467	0.115082	0.0694379	0.0620508	0.0552417	0.0924571	0.0856695	0.122024	0.107	0.073927	0.101662	0.0573842	0.124698	0.0636963	0.0337955	0.104587	0.139981	0.086356	0.0703384	0.0572314	0.0792482	0.10355	0.111577	0.0769323	0.0509677	0.0929953
Ankrd45	0.00212918	0.00126073	0	0.000488762	0.00116299	0.00580939	0.00317125	0.000380976	0.000766945	0.000759763	0.0018999	0.00100747	0	0	0.00159243	0	0	0	0.00172718	0.000448116	0	0	0	0	0.0039347	0.00149755	0	0.00151945	0	0.000766727	0	0	0	0	0	0	0.00286376	0	0	0	0.00103546	0	0	0	0	0	0	0	0
Tex50	0	0	0	0	0	0	0	0	0	0	0	0	0	0	0	0	0	0	0	0	0	0	0	0	0	0	0	0	0	0	0	0	0	0	0	0	0	0	0	0	0	0	0	0	0	0	0	0	0
Prdx6	1.07771	1.10316	1.16432	0.964451	0.99491	3.87719	4.3357	4.05913	3.30496	2.91936	3.10552	3.65161	3.39685	3.36438	3.08467	2.76279	4.01675	3.33517	2.75124	2.61977	0.881594	1.03374	1.03759	0.937765	0.862851	3.58093	4.25702	4.20906	3.76869	3.37839	2.20741	3.12236	2.23137	1.40124	1.92461	1.3457	1.58747	1.67828	1.4295	1.44402	0.926131	1.5409	1.33476	1.06173	0.907371	1.06786	1.33261	1.35092	1.11139
Tnfsf4	0	0	0	0	0	0	0	0.00210604	0	0.000369372	0.000535175	0	0	0	0	0	0	0.000893651	0	0.000631823	0	0	0	0	0	0	0	0	0	0	0	0	0	0	0	0	0	0	0	0	0.000775455	0	0	0	0	0	0	0	0
Tnfsf18	0	0	0	0	0	0	0	0	0	0	0	0	0	0	0	0	0	0	0	0.000794565	0	0	0	0	0	0	0	0	0	0	0	0	0	0	0	0	0	0	0	0	0	0	0	0	0	0	0	0	0
Fasl	0.00137879	0	0.000638739	0	0	0	0	0	0	0	0	0	0	0	0	0	0	0	0	0	0	0	0	0	0.00293665	0	0	0	0	0.00274412	0	0	0.00404911	0	0	0	0	0.00655747	0	0	0.00084559	0	0	0	0	0	0	0	0
Suco	0.469498	0.427853	0.438979	0.479559	0.348791	0.495033	0.378862	0.330687	0.415133	0.438121	0.436618	0.502365	0.523577	0.523374	0.414825	0.476855	0.441313	0.300604	0.412165	0.377488	0.387515	0.311118	0.337504	0.407463	0.297271	0.452662	0.4213	0.346929	0.374105	0.38175	0.32624	0.454105	0.352932	0.388695	0.701735	0.502115	0.509608	0.415261	0.405936	0.363767	0.412518	0.350078	0.36653	0.384162	0.234185	0.380276	0.426768	0.411084	0.379818
Gm31925	0	0	0	0	0	0	0	0	0	0	0	0	0	0	0	0	0	0	0	0	0	0	0	0	0	0	0	0	0	0	0	0	0	0	0	0	0	0	0	0	0	0	0	0	0	0	0	0	0
4930558K02Rik	0.00275867	0	0	0.00145025	0	0.00182628	0	0	0	0.000204094	0.00215207	0.00067117	0.00240073	0	0.00283284	0	0.0076721	0.00101329	0.000968024	0.00213326	0	0.00630195	0.00285471	0.00310117	0	0.000943972	0	0	0	0.0014817	0	0	0.00229676	0	0	0.00153896	0.00529848	0	0	0.0016654	0.000595272	0.0011179	0	0	0	0.00108511	0	0	0
Pigc	0.162803	0.0968684	0.126233	0.101033	0.131448	0.099414	0.0471496	0.0765134	0.0737997	0.12196	0.100448	0.0652827	0.0661359	0.0871069	0.118395	0.108952	0.0488952	0.0822871	0.10779	0.145758	0.178144	0.15944	0.117694	0.166095	0.22033	0.0865601	0.063936	0.0559543	0.0551406	0.0925323	0.0355913	0.0798265	0.0708703	0.0789511	0.0988782	0.160932	0.109393	0.101787	0.156369	0.182782	0.101333	0.0691156	0.099553	0.11052	0.206752	0.122287	0.0938135	0.10314	0.0925379
Gm38304	0	0	0	0	0	0	0	0	0	0	0	0	0	0	0	0	0	0	0.000530779	0.000645411	0	0	0	0	0.0028721	0	0	0	0	0	0	0	0	0	0	0	0.00898533	0	0	0	0	0	0.00162697	0	0	0	0	0.00303269	0
Dnm3	0.226708	0.130378	0.138723	0.137969	0.106591	0.0266425	0.0111054	0.0100413	0.0106138	0.00620139	0.03926	0.0186691	0.0282414	0.0142242	0.0224676	0.0752867	0.0119513	0.0313157	0.0210915	0.014618	0.453183	0.216189	0.307618	0.31894	0.270553	0.0374817	0.0205167	0.0131164	0.00738289	0.0067377	0.0681357	0.0545809	0.0217614	0.146413	0.0741591	0.402201	0.364849	0.326621	0.285779	0.301763	0.236038	0.110591	0.189284	0.216814	0.168934	0.606878	0.284005	0.278546	0.294131
2810442N19Rik	0	0	0	0.00229075	0.000500612	0	0	0	0	0	0.000539596	0	0	0	0	0	0	0	0	0	0.00334033	0	0.0100248	0	0.00151284	0.000956926	0	0	0	0	0	0	0	0	0	0.00170384	0	0	0	0.00158113	0.00252805	0	0	0.00229859	0.000941801	0.00193179	0.0035535	0.00372204	0
Dnm3os	0.318062	0.216623	0.283876	0.290444	0.174485	0.0241961	0	0.00604419	0.00362587	0.00189558	0.0111979	0.00602358	0.00176544	0.00201645	0.00637962	0	0.0213748	0.00773496	0.00271771	0.00421378	0.733642	0.594163	0.623002	0.758618	0.500913	0.00967919	0.00724598	0.00782936	0	0.00511905	0.0567876	0.01905	0.0294922	0.00688088	0.00940289	0.377241	0.26709	0.249662	0.298484	0.321238	0.435886	0.370681	0.39021	0.474584	0.247651	0.470299	0.38269	0.469621	0.397357
Mettl13	0.0774221	0.0842596	0.0913146	0.0869552	0.0590918	0.162864	0.145701	0.156784	0.106215	0.119003	0.168307	0.158608	0.128716	0.137307	0.128051	0.121943	0.107693	0.123325	0.0929583	0.0974954	0.0852926	0.0604465	0.08679	0.0847612	0.0600989	0.225224	0.207912	0.211797	0.152465	0.1745	0.196227	0.20269	0.160183	0.103764	0.143298	0.0674267	0.0762929	0.108509	0.0414265	0.0695455	0.0877448	0.0905387	0.0821785	0.0794305	0.0972532	0.0457124	0.0995298	0.0592498	0.0419527
Vamp4	0.379925	0.205387	0.276266	0.407965	0.504637	0.847418	0.386283	0.331655	0.420025	0.431946	0.761696	0.393664	0.420795	0.463916	0.648204	0.7403	0.252906	0.306581	0.385389	0.369024	0.396048	0.299413	0.316349	0.290957	0.427227	0.797144	0.392262	0.424376	0.487595	0.577002	0.415121	0.314667	0.1475	0.107671	0.239881	0.378706	0.350523	0.3971	0.480537	0.53377	0.288151	0.283201	0.263308	0.198041	0.316714	0.351517	0.287699	0.304189	0.256654
Myoc	0.84449	0.281735	0.722756	1.37389	0.882794	0.0151833	0.0136207	0.00251167	0.00237541	0.00467655	0.00906364	0.0024038	0	0.00141076	0.00590616	0	0	0.00172767	0.0186993	0.00421895	0.0172902	0.0508381	0.0281827	0.0170279	0.0381104	0.00142355	0.00170683	0.00985749	0.00536455	0.00391405	0.0144727	0.00774856	0.0120112	0	0	0.0332445	0.0464036	0.0473469	0.0126979	0.0663094	0.00363784	0.00144814	0	0.00679545	0.00791394	0.0205607	0.0642037	0.0371079	0.0318375
Myocos	0.000941189	0.00232224	0.00098936	0	0	0.00793614	0	0.0012739	0	0.00191359	0.00997817	0.0052563	0	0.00188125	0.00370859	0	0	0	0.00130515	0	0	0	0	0	0	0.00635994	0.00162479	0.00250018	0.00346569	0.00180686	0.00825322	0	0	0	0	0	0	0.0180579	0	0	0.0050415	0.00429654	0	0	0	0.00110382	0	0	0.00336159
Prrc2c	3.33074	3.97438	3.22043	3.04387	2.35382	3.75028	3.87836	3.14519	3.07356	3.19846	4.59591	5.28664	4.86274	4.47868	4.11932	4.37652	3.93291	3.08327	3.11653	3.03884	3.39181	3.38147	3.25988	3.3791	2.48128	4.26624	4.28472	3.411	3.19785	3.32703	4.12965	6.33005	4.47108	4.61336	3.95103	4.10118	4.8217	3.68991	3.39703	2.99455	3.55091	3.98609	3.77085	3.58615	2.64357	3.72172	3.935	3.23754	3.4146
Fmo4	0	0	0	0.00129298	0.000318921	0	0	0	0	0.000904977	0.000441598	0	0.00267683	0	0	0	0	0.000652554	0	0.00074869	0	0	0	0	0	0	0	0.00074629	0	0	0	0	0	0	0.0262172	0.0132618	0.00285891	0	0.00569775	0	0.00123362	0	0	0	0	0.00337578	0	0	0
Fmo1	0.0799313	0.0699276	0.104767	0.0724049	0.0905166	0.00177642	0	0.000414444	0	0.00638074	0.000843559	0.000909701	0	0	0.000993519	0	0	0.00208892	0.000918838	0.00142242	0.136941	0.125543	0.144456	0.108435	0.149775	0	0.00278908	0.00202701	0	0.00191177	0.00912001	0	0.00999082	0	0	0.451489	0.225762	0.181281	0.0900099	0.102102	0.134522	0.0712682	0.1477	0.110935	0.0985369	0.170632	0.0923764	0.183773	0.111959
Fmo2	0.0129515	0.0390598	0.0340364	0.0468206	0.0321598	0.00641283	0.00722263	0.0127174	0.00680586	0.0127771	0.00160133	0.00270445	0.00872471	0	0.000924099	0	0	0.0230176	0.010055	0.0115833	0.0535455	0.0730302	0.072156	0.0556061	0.0270503	0.00338307	0.00515401	0.00502505	0.00265357	0.00364897	0.00545665	0.0117504	0.00841159	0	0.00301126	0.365597	0.467255	0.305622	0.223093	0.0939643	0.0238971	0.0207616	0.00609069	0.00541532	0.0112193	0.0509751	0.0375981	0.0681655	0.0517125
Fmo6	0	0	0	0	0	0	0	0	0	0	0	0	0	0	0	0	0	0	0	0	0	0	0	0	0	0	0	0	0	0	0	0	0	0	0	0	0	0	0	0	0	0	0.00165997	0	0	0	0	0	0
Fmo3	0	0	0	0	0	0	0	0	0	0	0	0	0	0	0	0	0	0	0	0	0	0	0	0	0	0	0	0	0	0	0	0	0	0	0	0	0	0	0	0	0	0	0	0	0	0	0	0	0
Gm37273	0	0	0	0	0	0	0	0	0	0	0	0	0	0	0	0	0	0	0	0	0	0	0	0	0	0	0	0	0	0	0	0	0	0	0	0	0	0	0	0	0	0	0	0	0	0	0	0	0
Mroh9	0	0	0	0	0	0	0	0	0	0	0	0	0	0	0	0	0	0	0	0	0	0	0	0	0	0	0	0	0	0	0	0	0	0	0	0	0	0	0	0	0	0	0	0	0	0	0	0	0
Prrx1	1.06497	0.886493	0.707582	1.05678	0.721522	0.0190537	0.00763674	0.00231891	0.00754851	0.00104057	0.00826821	0.00482278	0.00603293	0	0.00398676	0.141621	0.0214781	0.00897299	0.0106852	0.00664249	0.620309	0.652793	0.751718	0.802186	0.676445	0.0070021	0.0040706	0.00157237	0.000806316	0.00450639	0.0376275	0.039967	0.0350233	0	0.00527008	1.09528	1.04623	0.741923	1.07689	0.96319	0.513483	0.43273	0.382786	0.384602	0.469487	0.589981	0.453179	0.408693	0.569946
Gm20471	0	0	0	0	0	0	0	0	0	0	0	0	0	0	0	0	0	0	0	0	0	0	0	0	0	0	0	0	0	0	0	0	0	0	0	0	0.00174244	0	0	0	0	0	0	0	0.000863981	0	0	0	0
Gm26523	0.0583941	0.0117751	0.00589364	0.0197589	0.0203026	0	0.000932771	0	0	0	0	0	0	0	0	0.0177857	0.00622312	0	0	0	0.01655	0.0241589	0.0174073	0.0153931	0.0365808	0	0	0	0	0	0.00584503	0	0	0	0.00762565	0.0428945	0.0183042	0.00910794	0.0094712	0.0296889	0.0194446	0.0078112	0.00867249	0.00985183	0.00529403	0.0247788	0.0101842	0.00204836	0.0105403
Gorab	0.097705	0.0817899	0.118239	0.0842808	0.120591	0.0966175	0.0984453	0.0946847	0.130765	0.117744	0.122989	0.127969	0.114525	0.0911425	0.163995	0.116989	0.0480376	0.0962768	0.0942542	0.119047	0.109304	0.100706	0.106537	0.119198	0.176882	0.129795	0.137069	0.135712	0.120398	0.158026	0.0497515	0.0773889	0.0490467	0.0759282	0.089962	0.114183	0.076038	0.151319	0.144755	0.169688	0.103666	0.0541129	0.0899835	0.0858081	0.123499	0.0598814	0.0974712	0.0667148	0.0698342
Gm29500	0	0	0	0	0	0	0	0	0	0	0	0	0	0	0	0	0	0	0	0	0	0	0	0	0	0	0	0	0	0	0	0	0	0	0	0	0	0	0	0	0	0	0	0	0	0	0	0	0
Mettl11b	0	0	0	0	0	0	0	0	0	0.00121645	0	0	0	0	0	0	0	0	0	0	0	0	0	0	0	0	0	0.000920819	0	0.000572843	0	0	0	0	0.00487503	0	0	0	0	0	0	0	0	0	0	0	0	0	0
Kifap3	0.608001	0.629439	0.532829	0.413756	0.525291	0.24995	0.421879	0.511776	0.472587	0.484022	0.282404	0.293163	0.346269	0.280403	0.301648	0.493489	0.519558	0.569193	0.515801	0.642149	0.553434	0.592283	0.49238	0.425363	0.566509	0.255658	0.338184	0.361315	0.277962	0.376264	0.314005	0.37675	0.528253	0.43354	0.492747	0.533842	0.723891	0.575766	0.381411	0.601232	0.55575	0.517036	0.506697	0.411062	0.498819	0.574122	0.647035	0.55166	0.432176
Scyl3	0.0786425	0.0468462	0.0710738	0.0507478	0.0828137	0.106252	0.123013	0.0861872	0.109038	0.145492	0.117405	0.0999684	0.132537	0.11738	0.158672	0.125468	0.0424563	0.0848636	0.103808	0.139224	0.0618299	0.0756216	0.055867	0.080638	0.0939765	0.0724362	0.0972394	0.0725082	0.0820591	0.111036	0.0596088	0.213627	0.0931321	0.143713	0.148959	0.0648525	0.0709978	0.0759817	0.0517366	0.0825701	0.0504244	0.0486086	0.0507248	0.0726958	0.0839084	0.0675136	0.0482254	0.0514127	0.0472995
BC055324	0.00868289	0.0201616	0.0174533	0.013497	0.00836338	0.0301836	0.0746756	0.0423877	0.0383974	0.0348704	0.0601532	0.0576694	0.039776	0.0494822	0.0757421	0.0890263	0.0591467	0.0341309	0.0262316	0.032506	0.00872883	0.0215816	0.00861379	0.00754598	0.0117307	0.122266	0.106122	0.115274	0.107549	0.101638	0.0986816	0.105371	0.0405746	0.142783	0.0359944	0.0128242	0.0139841	0.0203301	0.020165	0.0445886	0.014502	0.0104332	0.0112814	0.00397672	0.01146	0.0178334	0.0137924	0.0165516	0.0213314
Mettl18	0.0254482	0.0262394	0.0186819	0.0140684	0.0420368	0.0316034	0.0361095	0.0199784	0.0186094	0.0325006	0.0403575	0.037274	0.032665	0.0325406	0.0544135	0.0377418	0	0.0271824	0.0197052	0.0361721	0.0258498	0.02133	0.0179241	0.0162285	0.0550756	0.0413817	0.0468195	0.0308553	0.023	0.0486172	0.00812028	0.0187334	0.00417727	0	0.0128619	0.021907	0.00996683	0.0492359	0.0518069	0.0503704	0.0274937	0.0077612	0.0176729	0.0342396	0.0469007	0.0135729	0.020115	0.0243952	0.0150575
Sele	0	0.00479173	0.00179767	0.00179193	0.000750625	0	0	0.00370317	0.00920894	0.00151949	0	0	0	0	0	0	0	0.00215529	0.00180975	0.000432105	0	0	0.0129925	0	0	0.00385011	0	0	0	0	0	0	0.00948448	0	0	0	0.00226522	0.0155369	0.0101803	0	0	0.00336683	0.00873252	0	0	0.00262531	0.001436	0.0151558	0
Sell	0	0	0	0	0	0	0	0	0	0	0	0	0	0	0	0	0	0	0	0	0	0	0	0	0	0	0	0	0	0.000457353	0	0	0	0	0	0	0	0	0	0	0	0	0	0	0	0	0	0	0
Selp	0	0	0	0.000370573	0	0.00272392	0.00195149	0.00213004	0	0	0.000562364	0	0	0	0.000948136	0.0106082	0	0.000504601	0.00208342	0	0	0	0	0	0	0.00528433	0.00335636	0	0	0.000579008	0	0	0	0	0	0	0	0	0	0	0	0	0.00215423	0	0	0.001547	0	0	0.00294893
Gm16587	0.00112559	0.00981138	0.000870328	0	0.00241374	0.00257155	0	0.00130928	0.00112285	0	0.00101002	0.00108766	0.00214049	0	0	0	0	0	0	0	0	0	0	0	0	0	0.000929307	0	0	0	0	0.00730167	0	0	0	0.00207014	0	0	0	0.00273308	0	0	0	0	0	0	0	0	0
Gm16548	0.0227091	0.0304394	0.0188684	0.0363427	0.0424866	0.00689916	0.0132079	0.0110621	0.00130502	0.00192637	0.00141017	0.00239788	0.00525793	0.00422046	0	0.0127994	0.0595525	0.00879061	0.00528429	0.00641897	0.00418652	0.00294235	0	0.00128957	0.000999874	0.00425207	0.00224807	0.00714329	0.00444114	0.00326458	0.0059059	0	0.00362422	0	0	0.00308877	0.00469201	0	0.00763704	0.0205415	0	0	0	0	0	0.00639441	0.00687337	0	0
F5	0	0.00373889	0.00329717	0.00368776	0.00181359	0.00681014	0.0169362	0.0131642	0.0160578	0.00468816	0.0241201	0.0304727	0.0303114	0.0301088	0.0291021	0	0.113736	0.0236132	0.0144671	0.0122034	0	0	0.00960344	0	0	0.0127879	0.0149105	0.0178296	0.00421454	0.00860933	0.0333989	0.0196486	0.0410761	0.0649733	0.0149577	0.00270284	0.00170886	0.00509567	0	0	0	0	0	0	0	0.000970458	0	0	0
Slc19a2	0.0717027	0.0246562	0.0122157	0.0316555	0.0406936	0.155311	0.0552805	0.0500247	0.126767	0.136974	0.192036	0.0559176	0.053187	0.107689	0.128223	0.182231	0.12142	0.0648759	0.157363	0.216998	0.0364558	0.018452	0.0107772	0.0539778	0.0401015	0.116675	0.0637145	0.0481112	0.129129	0.145931	0.256128	0.0882277	0.119849	0.0277352	0.107349	0.0487655	0.0118252	0.0377362	0.0744772	0.0912301	0.0339359	0.0109588	0.0145162	0.0293847	0.0287902	0.0616781	0.0159154	0.0317903	0.0216474
Ccdc181	0.0246071	0.0387931	0.0423453	0.0507111	0.0128506	0.0777556	0.063462	0.0930972	0.0872074	0.0684679	0.086307	0.104269	0.0859664	0.13705	0.151942	0.185972	0.106655	0.0944911	0.091255	0.100331	0.0184695	0	0.0292879	0.011427	0.00302357	0.0892235	0.0725997	0.0733278	0.0569621	0.0828326	0.0599046	0.00408286	0.0185603	0.0719912	0.0256458	0.0278101	0.0176221	0.0138587	0.0456535	0.0337121	0.0109712	0.00723284	0.01729	0.0159484	0.0110736	0.0109441	0.00884945	0.0028071	0
Blzf1	0.145516	0.128168	0.103318	0.108467	0.116041	0.22293	0.196108	0.188098	0.191024	0.229794	0.178597	0.169971	0.246636	0.164893	0.234672	0.176011	0.17568	0.179294	0.157784	0.212186	0.15127	0.127889	0.0850879	0.120694	0.172444	0.162465	0.152401	0.206888	0.143503	0.18897	0.181602	0.283671	0.217726	0.0863314	0.257016	0.171009	0.150957	0.166077	0.10705	0.152255	0.15849	0.14829	0.149491	0.113263	0.150991	0.111842	0.10916	0.129627	0.0809165
Nme7	0.168253	0.112653	0.100375	0.144966	0.140663	0.207253	0.182946	0.200676	0.181607	0.193724	0.24853	0.263556	0.25542	0.277381	0.255111	0.186135	0.256287	0.152681	0.197068	0.198364	0.1041	0.124374	0.114304	0.121966	0.176775	0.203873	0.201129	0.189784	0.240785	0.225531	0.236391	0.393021	0.42551	0.14064	0.236091	0.183149	0.123311	0.20039	0.147293	0.161838	0.147861	0.0986711	0.139296	0.147802	0.139423	0.14109	0.108186	0.0868958	0.108316
Atp1b1	0.45582	0.276026	0.142175	0.0749699	0.037317	0.299648	0.360184	0.833126	0.346878	0.342735	0.80544	0.802551	1.40495	0.82974	0.590177	1.99646	1.19115	0.635787	0.613934	0.411431	0.15715	0.0895518	0.0774129	0.0576559	0.0266812	0.559693	0.513628	0.579688	0.416081	0.358199	0.643426	0.647451	0.817929	0.25693	0.327528	0.757797	0.444814	0.52935	0.412069	0.373546	0.0290523	0.0376614	0.0489846	0.0189725	0.0121214	0.306391	0.268602	0.165721	0.140935
Gm32391	0	0	0	0	0	0	0	0	0	0	0	0.00144551	0	0	0	0	0	0	0.000931469	0	0	0	0	0	0	0.000953222	0	0	0.000961358	0	0	0	0	0	0	0	0	0	0	0	0	0	0	0	0	0	0	0	0
Gm26685	0	0	0	0	0	0	0	0	0	0	0	0	0	0	0	0	0	0	0	0	0	0	0	0	0	0	0	0	0	0	0	0	0	0	0	0	0	0	0	0	0	0	0	0	0	0	0	0	0
Gm37754	0	0	0	0	0	0	0	0	0	0	0.000582967	0.000959985	0	0	0	0	0.0073989	0.00065698	0	0	0	0	0	0	0	0	0	0	0	0	0	0	0	0	0	0.00576669	0.00239323	0	0	0	0.00214522	0.000834084	0	0	0.00146621	0.00429561	0	0	0
[truncated: 29,719 more rows]
[truncated: 101 more columns]
