# Supplementary material for: Distinct waves of ovarian follicles contribute to mouse oocyte production
Source: eLife. 2025 Oct 7;14:RP107352. doi: 10.7554/eLife.107352 (PMC12503487; doi:10.7554/eLife.107352)
Supplement: Source data 3. — Excel file with multiple sheets: (1) Expression_2wk_6wk_Granulosa: average expression values of genes in re-clustered granulosa cells (gc0–gc17) from five samples, generated using Seurat. Column A: gene name. Row 3: cluster and sample name. (2) gc0_Metascape: Gene Ontology (GO) enrichment analysis of cluster gc0 (Metascape). (3) gc6_Metascape: GO enrichment analysis of cluster gc6 (Metascape). (4) gc11_Metascape: GO enrichment analysis of cluster gc11 (Metascape). [file elife-107352-data3.xlsx]

## Sheet: Expression_2wk_6wk_Granulosa
Source data 3. Re-clustered granulosa cell clusters: gc0–gc17
	0_O2w	0_O3w	0_O4w	0_O5w	0_O6w	1_O2w	1_O3w	1_O4w	1_O5w	1_O6w	2_O2w	2_O3w	2_O4w	2_O5w	2_O6w	3_O2w	3_O3w	3_O4w	3_O5w	3_O6w	4_O2w	4_O3w	4_O4w	4_O5w	4_O6w	5_O2w	5_O3w	5_O4w	5_O5w	5_O6w	6_O2w	6_O3w	6_O4w	6_O5w	6_O6w	7_O2w	7_O3w	7_O4w	7_O5w	7_O6w	8_O2w	8_O3w	8_O4w	8_O5w	8_O6w	9_O2w	9_O3w	9_O4w	9_O5w
Xkr4	0	0	0	0	0	0.00122912	0.00261706	0	0	0	0	0	0.00090917	0	0	0.00140396	0.00540396	0	0	0	0	0.00163941	0	0	0.00121521	0.00193517	0	0	0	0	0	0	0	0	0	0	0	0	0	0	0.00498037	0.0102474	0	0.00934599	0	0	0.00548126	0.00512678	0
Gm1992	0	0	0	0	0	0	0	0	0	0	0	0	0	0	0	0	0	0	0	0	0	0	0	0	0	0	0	0	0	0	0	0	0	0	0	0	0	0	0	0	0	0	0	0	0	0	0	0	0
Gm37381	0	0	0	0	0	0	0	0	0	0	0	0	0	0	0	0	0	0	0	0	0	0	0	0	0	0	0	0.00107196	0	0	0	0	0	0	0	0	0	0	0	0	0	0	0	0	0	0	0	0	0
Rp1	0	0	0	0	0	0	0	0	0	0	0	0	0	0	0	0	0.00160736	0	0	0	0	0	0	0	0	0	0	0	0	0	0	0	0	0	0	0	0	0	0	0	0	0	0	0	0	0	0	0	0
Sox17	0	0	0.00247344	0	0	0	0	0	0	0	0.00244695	0	0	0	0	0	0	0	0	0	0	0.0009923	0	0	0	0	0	0	0	0	0	0	0	0	0	0	0	0.00139955	0.00214917	0	0	0	0	0	0	0.00312719	0	0	0
Gm37323	0	0	0	0	0.000974327	0	0	0	0	0.00255938	0	0	0	0	0	0.00121982	0	0.00362319	0	0.00266093	0	0	0	0	0	0	0	0	0	0.00104669	0	0	0	0.00378624	0	0	0	0	0	0	0	0	0	0	0	0	0	0	0
Mrpl15	0.599573	0.408221	0.731889	0.697861	0.869533	0.823913	0.723739	0.745842	0.697176	0.828474	0.633522	0.665054	0.778537	0.782501	0.917334	0.744981	0.67697	0.566935	0.493257	0.730534	0.90526	1.00854	0.997287	1.21788	1.00003	0.86287	1.01876	0.880734	1.00824	0.967599	0.821895	0.806228	0.636067	0.65165	0.709701	0.836336	0.883918	0.943143	1.02559	1.09042	0.836849	0.774674	0.724206	0.622842	0.873009	0.972002	0.775802	0.772261	0.892922
Lypla1	0.167452	0.130798	0.186337	0.256456	0.285841	0.233024	0.0970349	0.101297	0.171834	0.182838	0.24225	0.0966531	0.142544	0.19681	0.225485	0.222258	0.140138	0.140417	0.115205	0.180634	0.265859	0.125894	0.122036	0.208741	0.258018	0.261116	0.159602	0.136899	0.224523	0.207341	0	0.0509954	0.185041	0.281759	0.324337	0.317081	0.15533	0.140966	0.197398	0.212642	0.27004	0.137508	0.127744	0.158327	0.182117	0.23113	0.121066	0.125222	0.173972
Gm37988	0	0	0.00152012	0.00281719	0.00518869	0	0.00161203	0	0	0	0	0	0	0.00174763	0.00815923	0.000982444	0	0.00460987	0	0	0.00185394	0	0	0	0	0	0	0	0	0	0	0	0.00139059	0	0	0	0	0.0011211	0	0	0	0	0	0	0	0	0	0.00465717	0
Tcea1	0.904435	0.928891	0.82112	1.00688	1.09318	1.19737	1.08002	0.899555	1.0948	1.01405	1.06788	0.867352	0.729661	0.880715	0.923365	1.13258	1.09539	0.825047	1.13927	0.879884	1.18905	1.13025	0.849975	0.988365	1.01638	1.2825	0.965491	0.80979	0.972296	0.961368	3.28758	0.982835	0.766791	1.04807	0.93283	0.900647	0.977311	0.761135	0.968096	0.968611	1.18253	1.20309	0.858973	1.25399	1.1422	1.12128	1.08248	0.893248	1.05594
Rgs20	0	0	0	0	0	0	0	0	0	0	0	0.00341018	0	0	0	0	0	0	0	0	0	0	0.00172906	0	0	0	0.00119253	0.00176929	0.00129794	0.00239972	0	0	0	0	0	0	0	0	0.002651	0	0	0	0	0	0	0	0	0	0
Gm16041	0	0	0	0	0	0	0	0	0	0	0	0	0	0	0.00135398	0.00122141	0	0	0	0	0	0	0	0	0	0	0	0	0	0	0	0	0	0	0	0	0	0	0	0	0	0	0	0	0	0	0	0	0
Atp6v1h	0.410798	0.201416	0.288813	0.527236	0.436932	0.359401	0.224643	0.238337	0.368098	0.281297	0.293439	0.164212	0.207365	0.328533	0.331156	0.308097	0.261825	0.262925	0.326055	0.317037	0.292485	0.167862	0.159265	0.257304	0.276108	0.246195	0.125782	0.137527	0.208597	0.196309	0.821895	0.45632	0.243177	0.398176	0.444968	0.290598	0.166304	0.201221	0.278515	0.262452	0.366721	0.190405	0.353975	0.311835	0.294212	0.337665	0.219942	0.245967	0.378522
Oprk1	0	0	0.000804711	0	0	0	0	0	0	0	0	0	0	0	0	0	0	0	0	0	0	0	0	0	0.0014059	0	0	0.00079986	0	0	0	0	0	0	0.00303747	0	0	0.00116562	0	0	0	0.0020357	0	0	0	0	0	0	0
Npbwr1	0	0	0	0	0	0	0	0	0	0	0	0	0	0	0	0	0	0	0	0	0	0	0	0	0	0	0	0	0	0	0	0	0	0	0	0	0	0	0	0	0	0	0	0	0	0	0	0	0
Rb1cc1	1.1268	0.960158	0.924539	1.30028	1.33205	0.990484	0.916359	0.827191	1.12699	1.15521	0.960096	0.933396	0.856169	1.09823	1.2587	1.08166	1.05145	1.04989	1.42522	1.31742	0.741236	0.665311	0.568951	0.865526	0.910654	0.870662	0.774663	0.750569	1.03036	1.03197	4.10948	1.84882	1.08318	1.46116	1.81304	0.788723	0.577651	0.657363	0.786574	1.07008	0.981328	0.93506	0.864453	1.24379	1.16967	0.793437	0.808864	0.655021	1.11584
4732440D04Rik	0.0733428	0.069419	0.0723551	0.0958772	0.107697	0.105587	0.0678898	0.0796668	0.0738885	0.0597641	0.101791	0.0747038	0.0791123	0.135263	0.0875701	0.0910891	0.083589	0.0822698	0.0813264	0.0983415	0.0741224	0.058196	0.0704905	0.0806351	0.0659934	0.0789017	0.0649377	0.0537425	0.0755705	0.0681769	0	0.26338	0.112746	0.106584	0.125415	0.091369	0.0621468	0.059846	0.0581969	0.0879807	0.0899544	0.0868259	0.041437	0.0856039	0.0774238	0.0892917	0.0735196	0.0754952	0.0758889
Alkal1	0	0	0	0	0	0	0	0	0	0	0	0	0	0	0	0	0	0	0	0	0	0	0	0	0	0	0	0	0.00118281	0	0	0	0	0	0	0	0	0	0	0	0	0	0	0	0	0.00146725	0	0	0
St18	0	0	0	0	0	0	0	0	0	0	0.00347933	0	0	0	0	0	0	0	0	0	0	0	0	0	0	0	0	0	0	0.00109072	0	0	0	0.0027509	0	0	0	0	0	0	0	0	0	0	0	0	0	0	0
Pcmtd1	0.783648	0.885864	0.810536	1.14551	0.918504	0.610629	0.591799	0.464436	0.68273	0.546521	0.577631	0.510554	0.504089	0.631543	0.602128	0.757563	0.778734	0.904026	1.03654	0.849051	0.407589	0.313393	0.303823	0.433458	0.373061	0.448052	0.268664	0.384371	0.469991	0.342417	1.64379	0.890734	0.743702	1.13628	0.924202	0.352784	0.228837	0.351817	0.337815	0.347141	0.646658	0.625098	0.676488	0.728819	0.584129	0.500431	0.425372	0.367683	0.5098
Gm26901	0.0420536	0.0435398	0.0106757	0.0197061	0.0222268	0.0906508	0.0627868	0.029127	0.039903	0.0570274	0.0482987	0.037805	0.0165886	0.0169488	0.0344741	0.0850494	0.0424226	0.0454333	0.0331288	0.0574392	0.0798098	0.0426785	0.0424967	0.0308958	0.0452735	0.0589459	0.0421847	0.0200838	0.0151595	0.0272383	0.821895	0	0.0154335	0.0109547	0.0136391	0.0181469	0.103815	0.0226613	0.0188367	0.0208949	0.0894235	0.0722118	0.0382958	0.0395996	0.0559019	0.0889998	0.0718639	0.0443054	0.0292512
Gm30414	0	0	0	0	0	0.00161871	0	0	0	0	0	0	0	0	0	0	0	0	0	0	0	0	0	0	0	0	0	0	0	0	0	0	0	0	0	0	0	0	0	0	0.00189631	0	0	0	0	0	0.00207359	0	0
Sntg1	0.0119574	0	0	0.000518164	0.00149705	0.014767	0.00598118	0	0	0.00557299	0.0258098	0	0	0	0.000924374	0.0122304	0	0	0	0.00373996	0.00711244	0.00797595	0	0.00808243	0.00274466	0.00858663	0.00374035	0	0	0.00123681	0	0	0	0	0.00218387	0	0.0247144	0	0.00555605	0.00201242	0.00498272	0	0	0.00514828	0.00324615	0.00847725	0.00270416	0	0
Rrs1	0.789067	0.684812	0.589851	0.717419	0.669658	1.08073	1.19189	1.19028	0.993544	1.04477	0.685875	0.940657	0.705887	0.71309	0.842912	1.04755	1.01881	0.784801	0.944527	0.794262	1.02928	0.903735	0.792316	0.734965	0.808184	0.876734	0.620199	0.565991	0.674619	0.588314	0	0.742537	0.635192	0.605608	0.634143	0.75348	0.66463	0.507896	0.542034	0.579993	1.20157	1.23042	1.07363	1.44871	0.839966	1.17614	1.14808	1.17387	0.959844
Adhfe1	0.0327541	0	0.0352378	0.0779447	0.076498	0.0647425	0.0231754	0.0400906	0.124875	0.0670479	0.0741011	0.0294133	0.0506128	0.0730452	0.0827809	0.0602154	0.0320104	0.0479102	0.0632924	0.0477475	0.0792403	0.0178607	0.0161126	0.0309087	0.0297628	0.102284	0.0267302	0.0455756	0.108312	0.111955	0	0	0.0475848	0.059494	0.106245	0.0979549	0.00450799	0.015908	0.0490073	0.0702932	0.0373876	0.0233269	0.0261023	0.0557791	0.0368928	0.0464633	0.0108708	0.0266697	0.0297509
3110035E14Rik	0	0	0	0	0	0	0	0	0	0	0	0	0	0	0	0	0	0	0	0	0	0	0	0	0	0	0	0	0	0	0	0	0	0	0	0	0	0	0	0	0	0	0	0	0	0	0	0	0
Gm29520	0	0	0	0	0	0	0	0	0	0	0	0	0	0	0	0	0	0	0	0	0	0	0	0	0	0	0	0	0	0	0	0	0	0	0	0	0	0	0	0	0	0	0	0	0	0	0	0	0
Mybl1	0.0385431	0.00799524	0.00413002	0.0105662	0.0138793	0.0127955	0.0142161	0.0330396	0.0370251	0.00635203	0.0237439	0.00620395	0.0117098	0.0106698	0.018057	0.0242878	0.0202625	0.0379691	0.0348617	0.0229835	0.0964656	0.0783138	0.0685076	0.050214	0.0770624	0.172257	0.0905147	0.100488	0.139084	0.129136	0	0	0.00128167	0.0148955	0.015572	0.0110602	0.0159321	0.0133491	0.0142653	0.0241847	0.021193	0.0164486	0.0166574	0.0300182	0.0219678	0.0507574	0.0555467	0.058144	0.0374882
Vcpip1	0.51477	0.346405	0.3251	0.403051	0.371606	0.402809	0.364524	0.379513	0.396656	0.356142	0.3879	0.356172	0.301335	0.387405	0.373597	0.378865	0.386788	0.447869	0.348363	0.278869	0.293418	0.294383	0.228144	0.284538	0.245199	0.428529	0.344995	0.31425	0.311689	0.312358	1.64379	0.15804	0.336252	0.471272	0.453298	0.294522	0.197411	0.242309	0.297798	0.263871	0.397901	0.368245	0.42457	0.419749	0.338311	0.361804	0.359923	0.277467	0.269141
1700034P13Rik	0	0	0.00302987	0.00079425	0.00311842	0.00256662	0	0.00425771	0	0.00197856	0.00648933	0	0.00238484	0.00204104	0	0.0107548	0	0.00377966	0	0	0.00155434	0.00513832	0.00342931	0	0.00523127	0.00371519	0	0.00163024	0.00220142	0.00411091	0	0	0	0	0.00662358	0	0	0.00594197	0	0	0.00299877	0	0.00818167	0.00934599	0	0.00350374	0.00220078	0.00988753	0
Sgk3	0.195377	0.107637	0.141381	0.107166	0.129541	0.180781	0.0394581	0.0275618	0.0455309	0.038252	0.295137	0.0832052	0.0924814	0.110236	0.148908	0.179947	0.0728684	0.0475735	0.0275764	0.0330794	0.212016	0.0755754	0.0713844	0.142234	0.111759	0.174941	0.0692247	0.05175	0.0992781	0.0672542	0	0.0735381	0.168552	0.178964	0.208361	0.243842	0.0949684	0.0429657	0.0863833	0.0544324	0.128233	0.0265665	0.00878741	0.0298566	0.00366614	0.168233	0.0276472	0.0456096	0.0601376
Mcmdc2	0.0146737	0	0.00250285	0.00628437	0.00978207	0.0143735	0.0147824	0.00554226	0.0116927	0.000846568	0.0339552	0.00653464	0.0217992	0.0140856	0.0166266	0.00775089	0	0.00519743	0.00592851	0.00806382	0.0134134	0.0230209	0.0223534	0.026659	0.013821	0.0136463	0.0100051	0.00941586	0.0191878	0.00879907	0	0	0.00528152	0.0171248	0.0199252	0.0178332	0.0107009	0.0152494	0.0164805	0.00846214	0.01249	0	0	0	0.00829193	0.00759173	0.00741565	0.00857007	0.0230163
Snhg6	1.21974	0.329823	0.262596	0.732489	0.910414	1.55804	0.278633	0.25217	1.08603	1.38333	1.83954	0.299432	0.505219	1.41885	2.01734	1.46757	0.263036	0.202782	0.932375	1.4022	1.16378	0.166171	0.203446	0.808246	1.19182	0.859704	0.146666	0.247297	0.795294	1.09733	0.821895	0.210878	0.542127	1.32258	1.84762	1.35303	0.3089	0.306085	1.03713	1.34135	1.31762	0.225638	0.295018	0.999319	1.40345	1.12703	0.212603	0.228633	0.784015
Tcf24	0.0125206	0	0.00500782	0.00900424	0.00371569	0.00117596	0	0	0	0.0014795	0.00439319	0.00644186	0.00135645	0.0165983	0.0166635	0.00127259	0.00181481	0	0	0.00400782	0	0.00152885	0.00111968	0.00515786	0.00326931	0.00615545	0.00583477	0	0.00534362	0.00147533	0	0	0.00147309	0.00417167	0.00124991	0	0	0.00137768	0.0105429	0.00409003	0	0	0	0	0.00332879	0	0	0	0
Ppp1r42	0	0.00956332	0.00189833	0	0.000527226	0.000958591	0	0	0	0	0	0	0.00076253	0	0.00128592	0.00124576	0	0	0	0.00313104	0.00205137	0	0.00119653	0.00154639	0	0.00483056	0	0	0	0.00228502	0	0	0	0	0.00323156	0	0	0	0	0.0013292	0.00369195	0	0	0	0.00285414	0.00709413	0	0	0
Gm15818	0	0	0	0	0	0	0	0	0	0	0	0	0	0	0	0	0	0	0	0	0	0	0	0	0	0	0	0	0	0	0	0	0	0	0	0	0	0	0	0	0	0	0	0	0	0	0	0	0
Cops5	1.41748	1.27716	1.39684	1.2062	1.28128	1.35474	1.30601	1.22529	1.19543	1.20836	1.15685	1.1572	1.29544	1.18217	1.25	1.29224	1.18437	1.15961	1.14032	1.33611	1.37577	1.41089	1.5255	1.42015	1.38425	1.61472	1.52688	1.44895	1.45969	1.38965	0.821895	1.32411	1.36506	1.16552	1.37311	1.5583	1.49474	1.46481	1.31669	1.42022	1.34797	1.3028	1.29297	1.21789	1.19826	1.41245	1.50771	1.38515	1.32336
Cspp1	0.923077	0.7413	0.625706	0.588074	0.619011	1.01731	0.930993	0.965552	0.811358	0.975963	0.953241	0.713432	0.683302	0.622145	0.742629	1.04752	0.967198	0.948534	0.871765	0.96516	0.800161	0.686646	0.694705	0.619843	0.735026	1.1651	0.974936	0.759165	0.751608	0.847693	2.46569	0.889179	0.802954	0.820367	1.0528	0.695822	0.693122	0.546641	0.560493	0.63411	0.914839	0.766727	0.781764	1.01838	0.772567	0.971711	0.811022	0.917731	0.913236
Arfgef1	0.822325	0.816613	0.623766	0.655461	0.594805	0.667802	0.690882	0.639302	0.597619	0.679499	0.584548	0.658463	0.634898	0.566505	0.65464	0.686835	0.762257	0.745997	0.674708	0.601725	0.506959	0.533879	0.528615	0.511425	0.516074	0.609752	0.548076	0.5531	0.555067	0.56978	1.64379	0.776227	0.839071	0.732794	0.843272	0.516918	0.503203	0.439607	0.366777	0.565589	0.732818	0.753649	0.589713	0.588135	0.705765	0.615617	0.592415	0.684842	0.595379
Cpa6	0	0	0.001118	0	0	0	0	0.00503011	0	0	0	0	0	0	0	0.000940885	0	0	0	0	0	0	0	0	0	0	0	0	0.00102961	0	0	0	0.00140699	0	0	0	0	0	0	0	0	0	0	0	0	0	0	0	0
Prex2	0	0.0112069	0.0105442	0.00864266	0.0141049	0.00460751	0.00213384	0.00292757	0.0133696	0.00668434	0.0105721	0.0154698	0.0167673	0.031798	0.00546289	0.0027069	0.00170355	0.00482373	0.0121977	0.00240847	0.0100059	0.00124587	0.013013	0.00508432	0.00631367	0.00709786	0	0.0100867	0.00256296	0.00484355	0	0.0522488	0.0376665	0.0233354	0.0238918	0.0323025	0	0.00237815	0	0.00710274	0.00457024	0	0	0	0.00678962	0.0136582	0	0.0174406	0
A830018L16Rik	0	0	0.000615649	0.00123218	0.000855988	0.00144158	0.00131171	0	0	0.00113483	0.00413275	0.00252053	0.000535213	0	0	0	0	0	0	0.00267443	0.00231867	0	0	0	0.000990623	0.00464221	0	0	0	0.000994918	0	0	0.00722249	0.00308105	0.0228882	0	0	0.00570563	0	0	0	0.00366319	0	0	0	0.00150186	0	0.00512678	0
Gm17644	0	0	0	0	0	0	0	0	0	0	0	0	0	0	0	0	0	0	0	0	0.00258266	0	0	0	0	0	0	0	0	0	0	0	0	0	0	0	0	0	0	0	0	0	0	0	0	0	0	0	0
Gm29663	0	0	0	0	0	0	0	0	0	0	0	0	0	0	0	0	0	0	0	0	0	0	0	0	0	0	0	0	0	0	0	0	0	0	0	0	0	0	0	0	0	0	0	0	0	0	0	0	0
Sulf1	0.388974	0.255407	0.0304675	0.0262188	0.0138683	0.103584	0.0669061	0.0344221	0.0528897	0.0482771	0.107027	0.00132518	0.0140036	0	0.00214727	0.266953	0.448596	0.312366	0.357893	0.486198	0.0272843	0.0179014	0.0100942	0.00434487	0.0104705	0.139526	0.0284373	0.0229034	0.0278389	0.0110914	0	0	0.0155315	0.0194439	0.00692702	0.0242981	0	0	0	0.0040952	0.150185	0.273133	0.261614	0.259744	0.259451	0.0711536	0.12709	0.0672787	0.036479
Slco5a1	0	0	0.014712	0.00633112	0.00202392	0.00127331	0	0	0	0	0	0	0.00294427	0.00310335	0	0.00142561	0	0	0	0	0	0	0.00095354	0.00159865	0	0.00237026	0	0	0	0	0	0	0.0115906	0	0.00942399	0	0	0.000842856	0	0	0.00732664	0	0	0	0	0	0	0	0
Gm29283	0	0	0	0	0	0	0	0	0	0	0	0	0	0	0	0	0	0	0	0	0	0	0	0	0	0	0	0	0	0	0	0	0	0	0	0	0	0	0	0	0	0	0	0	0	0	0	0	0
Prdm14	0	0	0	0	0.00204682	0	0	0	0	0	0	0	0	0.00135662	0	0.0137641	0	0	0	0	0	0	0	0	0	0	0	0	0	0	0	0	0	0	0	0	0	0.00129971	0	0	0	0	0	0	0	0	0	0	0
Ncoa2	0.542647	0.467699	0.373463	0.403355	0.424643	0.330962	0.339452	0.412817	0.511523	0.441522	0.476646	0.431365	0.401225	0.394555	0.339964	0.343181	0.364357	0.455833	0.394623	0.302782	0.383764	0.374065	0.357851	0.377808	0.335101	0.259843	0.278715	0.372282	0.349317	0.277039	0	1.00099	0.642166	0.583901	0.685045	0.335308	0.400871	0.306372	0.301448	0.32217	0.319986	0.267933	0.380189	0.432349	0.269021	0.285567	0.354235	0.36453	0.387415
Gm29570	0	0	0	0	0	0	0	0	0	0	0	0	0	0.00225337	0	0.00126603	0	0	0	0	0	0.00346852	0	0	0	0	0	0.000571682	0	0	0	0	0	0	0	0	0	0	0.00308596	0.00155624	0.00157758	0	0	0	0	0.00386489	0	0.00512678	0
Tram1	0.491268	0.615138	0.478947	0.529621	0.662959	0.553077	0.577963	0.574129	0.524123	0.659336	0.632447	0.544033	0.541596	0.547158	0.574812	0.514478	0.45557	0.507238	0.434441	0.418946	0.60027	0.752453	0.772158	0.653635	0.874778	0.464663	0.525408	0.535207	0.571837	0.66147	0	0.361384	0.427343	0.448213	0.58465	0.715296	0.656563	0.630024	0.618082	0.807102	0.597274	0.460908	0.518139	0.608885	0.622147	0.656978	0.608377	0.807928	0.711676
Lactb2	0.148317	0.0558072	0.0778151	0.148548	0.144089	0.109528	0.0870852	0.0771483	0.182892	0.123684	0.167661	0.110841	0.0602843	0.135149	0.133132	0.108726	0.0765866	0.0573889	0.152155	0.123327	0.185328	0.0877626	0.0723904	0.148853	0.15829	0.105551	0.0649912	0.0617799	0.119963	0.127044	0	0.206074	0.0657132	0.153977	0.207134	0.160714	0.048589	0.0889127	0.139585	0.138452	0.126224	0.0938648	0.10792	0.162213	0.0747789	0.117263	0.0897984	0.116748	0.180188
Xkr9	0	0	0	0	0	0	0	0	0	0	0	0	0	0	0	0	0	0	0	0	0	0	0	0	0	0	0	0	0	0	0	0	0.00166914	0	0	0	0	0	0	0	0	0	0	0	0	0	0	0	0
Eya1	0	0.0213067	0.00425627	0.00427268	0.00329573	0.009369	0.00791837	0	0.00380503	0.00429395	0.00660552	0.00817289	0.00765929	0.0116506	0.00460506	0.00862211	0.00755921	0.0032791	0	0.0115011	0	0.00835531	0.00432889	0	0	0.00236727	0.00307208	0.00453991	0.0014407	0.00716883	0	0	0.00852642	0.0147375	0.0187332	0	0	0.00887012	0.00722455	0.0012388	0.0109704	0.0121922	0.00799262	0	0	0	0.0112264	0	0.0106423
Gm9947	0	0	0	0	0.000922133	0	0	0	0	0	0	0	0	0	0	0	0	0	0	0	0	0	0	0	0	0	0	0	0	0	0	0	0	0.00156783	0	0	0	0	0	0	0	0	0	0	0	0	0	0	0
Msc	0	0	0	0	0.00151566	0	0	0	0	0	0	0	0	0	0	0	0	0	0	0.00804975	0	0	0	0	0.00136248	0	0	0.000734826	0	0	0	0	0.00325296	0.00190351	0	0	0	0	0	0.00291526	0	0	0	0	0	0	0	0	0
Trpa1	0	0	0	0	0	0	0	0	0	0	0	0	0	0	0	0	0	0	0	0	0	0	0	0	0	0	0	0	0	0	0	0	0.00189753	0	0	0	0	0	0	0	0	0	0	0	0.00316252	0	0	0	0
Kcnb2	0.10341	0.0815809	0.027676	0.0258771	0.0551759	0.0635743	0.0497753	0.0508923	0.0243901	0.0188788	0.0265385	0.0198146	0.035712	0.039704	0.033052	0.0674039	0.0515842	0.0462755	0.0269238	0.0221141	0.0630829	0.0258294	0.0395483	0.0159076	0.0132947	0.0244109	0.028731	0.0412699	0.0216077	0.0153401	0	0.0806348	0.0699598	0.0574788	0.0518618	0.0242924	0.0172695	0.00499998	0.00815717	0.0138949	0.120675	0.0536538	0.120473	0.0231028	0.0128939	0.100873	0.041054	0.0846228	0.0110831
Terf1	0.228216	0.29078	0.125692	0.215983	0.213563	0.180047	0.150497	0.130957	0.167232	0.272642	0.193099	0.1447	0.128957	0.208923	0.230824	0.166255	0.1485	0.123095	0.251185	0.219858	0.221163	0.148094	0.170282	0.242345	0.250526	0.932949	0.525116	0.670764	0.887745	0.96653	0	0.066306	0.161858	0.267113	0.293615	0.186566	0.125649	0.140021	0.230149	0.214992	0.16218	0.136118	0.179729	0.246095	0.221351	0.199957	0.142821	0.0866242	0.267831
Sbspon	0	0	0	0	0	0.00240849	0	0	0	0	0	0	0	0	0	0	0	0	0.0134623	0	0	0	0	0	0	0	0	0.00379161	0	0	0	0	0.00440534	0.0112192	0.00569986	0	0	0	0	0.00172608	0.00176065	0	0	0	0	0	0	0	0
4930444P10Rik	0	0	0	0	0	0.00100278	0	0	0	0	0	0	0	0	0	0	0	0	0	0	0	0	0	0	0	0	0	0	0	0	0	0	0	0	0	0	0	0	0	0	0	0	0	0	0	0	0	0	0
Rpl7	19.5336	26.3192	32.3182	25.1928	23.1339	24.1104	27.5807	28.8391	29.0882	26.4485	24.7488	31.417	35.9813	31.1524	28.3443	23.4513	25.0468	26.3656	25.9588	23.4826	25.0262	29.1939	31.6106	30.2304	26.2102	19.4318	24.1087	29.0347	25.4958	22.4965	21.3693	23.833	33.2439	28.7517	25.1478	25.6058	26.9022	33.8739	31.4663	27.4195	23.8706	25.6674	26.0719	25.5668	25.5491	24.1178	27.282	27.4335	28.5328
Rdh10	0.166801	0.107792	0.0488442	0.0463412	0.0714866	0.0631328	0.0654241	0.0616031	0.0473896	0.0377846	0.0616277	0.0551338	0.0324507	0.0491835	0.0419985	0.0593147	0.0695929	0.0798547	0.10323	0.0456722	0.0416063	0.0566826	0.0491849	0.0415917	0.0367618	0.0511765	0.04536	0.04678	0.032986	0.0472367	0	0	0.0510157	0.0616427	0.0618464	0.0151307	0.0495483	0.0319089	0.023493	0.0542411	0.0403653	0.0529045	0.106701	0.0969281	0.0373328	0.0383861	0.0722945	0.0559306	0.0293321
Gm28095	0	0	0	0	0	0	0	0	0	0	0	0.00211274	0	0	0	0	0	0	0	0	0	0	0	0	0	0.00206218	0	0	0	0	0	0	0	0	0	0	0	0	0	0	0	0	0	0	0	0	0	0	0
Stau2	0.255122	0.228379	0.18696	0.226271	0.228012	0.2661	0.186278	0.201909	0.236006	0.219684	0.200547	0.170146	0.164302	0.196213	0.155719	0.265829	0.238389	0.218732	0.312707	0.237268	0.246968	0.201442	0.166519	0.178833	0.225593	0.172342	0.136	0.144115	0.176886	0.174471	0	0.45732	0.222895	0.26491	0.238962	0.14657	0.0940071	0.102112	0.17531	0.149951	0.278578	0.185241	0.231888	0.253665	0.288586	0.268861	0.227878	0.291359	0.210142
Gm7568	0	0	0	0	0	0	0	0	0	0	0	0	0	0.00267116	0	0	0	0	0	0	0	0	0	0	0	0	0	0	0	0	0	0.26338	0	0	0	0	0	0	0	0	0	0	0	0	0	0	0	0	0
Ube2w	0.544429	0.317673	0.23746	0.416492	0.467687	0.463068	0.272973	0.246512	0.359516	0.417514	0.421325	0.22286	0.231635	0.373951	0.396208	0.458659	0.363362	0.342967	0.572807	0.448767	0.360372	0.215872	0.172354	0.251696	0.327352	0.390296	0.188943	0.192174	0.297841	0.308403	0	0.244582	0.300094	0.437515	0.511418	0.424541	0.184828	0.188347	0.33697	0.388638	0.432013	0.275862	0.327833	0.484614	0.444093	0.386819	0.281005	0.297008	0.390446
Eloc	1.675	1.20473	0.795512	1.25332	1.43299	1.49362	0.917021	0.786162	1.16234	1.326	1.83112	0.851302	0.752857	1.15409	1.32936	1.52789	0.951828	0.891169	1.32869	1.41836	1.9171	1.31691	1.12767	1.87531	1.96726	1.7247	1.26904	0.983033	1.74245	1.92513	0.821895	0.547166	0.741386	1.28658	1.4653	2.12316	1.28255	0.993693	1.73209	1.82101	1.40169	0.860483	0.824696	1.39446	1.27833	1.62565	1.12752	0.965347	1.41507
D030040B21Rik	0	0	0	0.00201255	0.00320513	0.00184575	0	0	0	0.00289573	0	0	0	0	0	0.00212983	0	0.00491269	0	0.0266095	0	0.00487304	0	0.0016925	0.00187248	0.00263107	0.00536908	0.00114554	0.00293609	0.00288769	0	0	0	0.0022717	0	0	0	0	0	0.0018067	0.00173786	0.00163783	0	0.00711493	0	0.00527604	0	0	0
Tmem70	0.420212	0.324369	0.330135	0.354589	0.388866	0.466757	0.391193	0.363052	0.35234	0.443501	0.446247	0.388218	0.340194	0.319358	0.51185	0.433783	0.381626	0.402517	0.318318	0.495467	0.424471	0.418611	0.371526	0.455723	0.414019	0.458345	0.395656	0.347397	0.425362	0.403828	0	0.246486	0.327026	0.342893	0.424702	0.353723	0.365522	0.402091	0.413613	0.448141	0.475516	0.427913	0.487201	0.480311	0.519322	0.521658	0.391564	0.396287	0.390652
Ly96	0.0734547	0.0795517	0.0847392	0.1423	0.118531	0.102558	0.0452721	0.0325893	0.0544598	0.0739315	0.0689069	0.0564497	0.0630409	0.102185	0.0922441	0.134869	0.0866489	0.0987379	0.0707154	0.113636	0.0709914	0.0471384	0.050806	0.0711252	0.057674	0.0826824	0.0345296	0.0642799	0.0720163	0.0766398	0	0.0535424	0.0645071	0.137849	0.108709	0.0780855	0.0280409	0.0599637	0.0851356	0.0903589	0.131964	0.0706986	0.0837548	0.0484966	0.0929221	0.0813817	0.0253055	0.0681145	0.0584967
Gm28376	0	0	0	0	0	0	0	0	0	0	0	0	0	0	0	0	0	0	0	0	0	0	0	0	0	0	0	0	0	0	0	0	0	0	0	0	0	0	0	0	0	0	0	0	0	0	0	0	0
Jph1	0.109718	0.11453	0.0283048	0.029651	0.0415281	0.0616335	0.0396936	0.0304452	0.0251565	0.0180666	0.100542	0.039301	0.0416203	0.0313701	0.0230487	0.0272897	0.0533124	0.0619274	0.0623119	0.0255552	0.0969419	0.0720817	0.0259833	0.0609248	0.0487958	0.0286166	0.0427767	0.02408	0.046992	0.0363138	0	0.066306	0.0379214	0.0409508	0.0457865	0.103218	0.0760466	0.0187726	0.0245732	0.0222468	0.0125764	0.0200966	0.00675157	0.0214832	0.00661087	0.0374524	0.0296055	0.0449169	0.0480948
Gm28783	0	0	0	0	0	0	0	0	0	0	0	0	0	0	0	0	0	0	0	0	0	0	0	0	0	0	0	0	0	0	0	0	0	0	0	0	0	0	0	0	0	0	0	0	0	0	0	0	0
Gdap1	0	0	0	0	0	0.000930165	0	0	0	0	0	0	0	0	0	0.00176801	0	0	0	0	0.00238403	0	0.000883013	0	0	0	0	0.00229973	0	0	0	0	0	0	0.00124991	0	0	0	0	0	0	0	0	0.0067347	0	0.00139777	0	0	0
Gm28784	0	0	0	0	0	0	0	0	0	0	0	0	0	0	0	0	0	0	0	0	0	0	0	0	0	0	0	0	0	0	0	0	0	0	0	0	0	0	0	0	0	0	0	0	0	0	0	0	0
Pi15	0	0	0	0.000713627	0.000857401	0.0050198	0	0	0	0.00626655	0.00387029	0	0	0	0	0.0112179	0	0	0	0	0.00416534	0.00165967	0	0	0.000932179	0.00216141	0	0	0	0	0	0	0	0	0.0114438	0.00733487	0.0037548	0	0	0	0.00128265	0	0	0	0.00242653	0.00475241	0	0	0
Gm28154	0	0	0.000824481	0	0	0	0	0	0	0	0	0	0	0	0	0	0	0	0	0	0	0	0	0	0	0	0	0	0	0	0	0	0	0	0	0	0	0	0	0	0	0	0	0	0	0	0	0	0
Gm16070	0	0	0	0.000540979	0.000642057	0	0	0	0	0	0	0	0	0	0	0.00105433	0.00196099	0	0	0	0.00220013	0	0	0	0	0	0	0	0	0	0	0	0.00118351	0	0	0	0	0	0	0	0.000883786	0	0	0	0	0	0	0	0.00506801
Crispld1	0.0484096	0.00536927	0.0017255	0.00702723	0.00914098	0.0430076	0.0192244	0.00900488	0.0133288	0.0115038	0.0617844	0.00860091	0.00559322	0.00799493	0.0133436	0.0420591	0.00865873	0.0105353	0.0243647	0.0154771	0.0499333	0.00664024	0.00380157	0.00153686	0.00754543	0.0216641	0.00605992	0	0.00172472	0	0	0	0.00330713	0.00819282	0.00268971	0.049396	0.0117981	0.00123049	0	0	0.0178422	0.0133641	0.0102647	0.0261456	0.0218256	0.0289018	0.00968432	0.0104171	0.0180638
Gm28153	0	0	0	0	0	0	0	0	0	0	0	0	0	0	0	0	0	0	0	0	0	0	0	0	0	0	0	0	0	0	0	0	0	0	0	0	0	0	0	0	0	0	0	0	0	0	0	0	0
Crisp4	0	0	0	0	0	0	0	0	0	0	0	0	0	0	0	0	0	0	0	0	0	0	0	0	0	0	0	0	0	0	0	0	0	0	0	0	0	0	0	0	0	0	0	0	0	0	0	0	0
Defb18	0	0	0	0	0	0	0	0	0	0	0	0	0	0	0	0	0	0	0	0	0	0	0	0	0	0	0	0	0	0	0	0	0	0	0	0	0	0	0	0	0	0	0	0	0	0	0	0	0
Defb41	0	0	0	0	0	0	0	0	0	0	0	0	0	0	0	0	0	0	0	0	0	0	0	0	0	0	0	0	0	0	0	0	0	0	0	0	0	0	0	0	0	0	0	0	0	0	0	0	0
Gm15825	0	0	0	0	0	0	0	0	0	0	0	0	0	0	0	0	0	0	0	0	0	0	0	0	0	0	0	0	0	0	0	0	0	0	0	0	0	0	0	0	0	0	0	0	0	0	0	0	0
Tfap2d	0	0	0	0	0	0	0	0	0	0	0	0	0	0	0	0	0	0	0	0	0	0	0	0	0	0	0	0	0	0	0	0	0	0	0	0	0	0	0	0	0	0	0	0	0	0	0	0	0
Tfap2b	0	0	0	0	0	0	0	0	0	0	0	0	0	0	0	0	0	0	0	0	0	0	0	0	0	0	0	0	0	0	0	0	0	0	0	0	0	0	0	0	0	0	0	0	0	0	0	0	0
Gm28340	0	0	0	0	0	0	0	0	0	0	0	0	0	0	0	0	0	0	0	0	0	0	0	0	0	0	0	0	0	0	0	0	0	0	0	0	0	0	0	0	0	0	0	0	0	0	0	0	0
Pkhd1	0	0	0	0	0	0	0	0	0	0	0	0	0	0	0	0	0	0	0	0	0	0	0	0	0	0	0	0	0	0	0	0	0	0	0	0	0	0	0	0	0	0	0	0	0	0	0	0	0
4930486I03Rik	0	0	0	0	0	0	0	0	0	0	0	0	0	0	0	0	0	0	0	0	0	0	0	0	0	0	0	0	0	0	0	0	0	0	0	0	0	0	0	0	0	0	0	0	0	0	0	0	0
Gm28653	0	0	0	0	0	0	0	0	0	0	0	0	0	0	0	0	0	0	0	0	0	0	0	0	0	0	0	0	0	0	0	0	0	0	0	0	0	0	0	0	0	0	0	0	0	0	0	0	0
Il17a	0	0	0	0	0	0	0	0	0	0	0	0	0	0	0	0	0	0	0	0	0	0	0	0	0	0	0	0	0	0	0	0	0	0	0	0	0	0	0	0	0	0	0	0	0	0	0	0	0
Il17f	0	0	0	0	0	0	0	0	0	0	0	0	0	0	0	0	0	0	0	0	0	0.00170492	0.000860386	0.00254628	0	0	0.00215089	0	0	0.00115713	0	0	0	0	0.00215188	0	0.00343156	0	0	0	0	0	0	0	0	0.00154534	0.00210984	0.00331646	0.00846909
Mcm3	0.144363	0.102491	0.16883	0.12011	0.114133	0.225363	0.260101	0.243047	0.184445	0.207338	0.232549	0.291289	0.102588	0.173467	0.062184	0.151807	0.15282	0.144515	0.096344	0.0884715	2.99187	2.86762	2.495	2.31358	2.38347	0.780289	0.989915	0.828137	0.846896	0.925604	0	0	0.0909531	0.0889989	0.0473747	0.584442	1.24857	0.642711	0.53594	0.487553	0.214039	0.211482	0.319108	0.19994	0.225552	1.91961	2.14137	2.47536	1.78071
Gm28065	0	0	0	0	0	0	0	0	0	0	0	0	0	0	0	0	0	0	0	0	0	0	0	0	0	0	0	0	0	0	0	0	0	0	0	0	0	0	0	0	0	0	0	0	0	0	0	0	0
6720483E21Rik	0	0	0.00220745	0.000941149	0.000556679	0	0.0013523	0	0	0	0.00476358	0	0.00212304	0.00226906	0	0	0	0	0	0	0	0.00316646	0.0019926	0	0	0	0	0.000883795	0	0	0	0	0	0	0	0	0	0.00132395	0	0.00404642	0	0	0	0	0	0	0	0	0
Paqr8	0.0249379	0.0052533	0.0270576	0.0446683	0.0588102	0.0415999	0.0184938	0.0230076	0.054983	0.029913	0.0411845	0.0494053	0.0190421	0.0305452	0.0484718	0.0348225	0.0287086	0.0207983	0.0179239	0.0419898	0.0300671	0.0588506	0.069178	0.101338	0.117396	0.0396772	0.0735317	0.0522618	0.0662823	0.091126	0	0	0.0120367	0.0454887	0.0421881	0.0286654	0.0654605	0.0715057	0.118002	0.109722	0.0379023	0.032709	0.0160287	0.0177387	0.0292333	0.0348142	0.0284502	0.0430287	0.050321
Efhc1	0.0159548	0	0.00656436	0.0129039	0.00838098	0.0101649	0.00649202	0.00315769	0.0143484	0.0109139	0.00327621	0.0237128	0.00448212	0.0140186	0.00615474	0.00594297	0.0135457	0.00367684	0.00892426	0.0120676	0.00619253	0.0060008	0.00641464	0.0143761	0.015401	0.0091398	0.00888802	0.00921187	0.00464044	0.0124519	0	0.0935769	0.00339034	0.00316585	0.00891454	0.020652	0.00429245	0.00294388	0.029604	0.00354101	0.0106619	0.00663017	0.0145734	0	0	0.0148427	0.01017	0.00830293	0
Tram2	0.0586345	0.313599	0.411518	0.393163	0.431147	0.242397	0.485603	0.721839	0.564074	0.494172	0.402369	0.806173	0.67955	0.69356	0.694986	0.0962411	0.135016	0.211992	0.12641	0.121242	0.426144	0.677879	0.704791	0.794499	0.733841	0.172501	0.58116	0.693301	0.628086	0.572083	0	0.536985	0.300046	0.331043	0.338905	0.482729	0.979641	0.743937	0.824328	0.846787	0.184952	0.25554	0.458674	0.228732	0.310864	0.300559	0.456809	0.553152	0.511243
Gm28287	0	0	0	0	0	0	0	0	0	0	0	0	0	0	0	0	0.00114829	0	0	0	0.00218764	0	0.00120714	0	0	0	0.00177039	0.000507456	0	0	0	0	0	0	0	0	0.00408709	0.00221873	0.0027826	0	0	0	0	0	0	0	0	0	0
Tmem14a	0.0804288	0.0707823	0.108175	0.0587545	0.0725599	0.089419	0.0970381	0.0911555	0.0612307	0.0982385	0.10366	0.0768009	0.0669831	0.0469642	0.0559939	0.0961035	0.0795029	0.132274	0.120088	0.0773745	0.0801572	0.0939323	0.0736497	0.0744009	0.0912686	0.114703	0.0618429	0.068885	0.0621796	0.0667533	0	0	0.094312	0.117448	0.076101	0.0963229	0.121275	0.119381	0.101806	0.0835965	0.0948706	0.115623	0.0925196	0.0711782	0.10711	0.0764945	0.085072	0.0858143	0.0484901
Gsta3	0.0347989	0.00652917	0.0220321	0.0229924	0.0230816	0.0586826	0.0245887	0.0353134	0.0377427	0.014545	0.013804	0.00963491	0.0110666	0	0.018899	0.0732696	0.0345161	0.0530856	0.0686008	0.0375832	0.070562	0.0394961	0.0582441	0.015594	0.0239216	0.234886	0.0345626	0.030672	0.0313538	0.0217797	0	0	0.00624194	0.0235514	0.00473771	0.0136998	0.00771174	0.0460017	0.0167893	0.0212671	0.187234	0.0407096	0.182488	0.149745	0.0719047	0.157432	0.036951	0.087876	0.0253747
Gm28836	0	0	0	0	0	0	0	0	0	0	0	0	0	0.00214164	0	0	0	0	0	0	0	0	0	0	0	0	0	0	0	0	0	0	0	0	0	0	0	0	0	0	0	0	0	0	0	0	0	0	0
Khdc1a	0	0	0	0	0	0	0	0	0	0	0	0	0	0	0	0	0	0	0	0	0	0	0	0	0	0	0	0	0.00221402	0	0	0	0	0.00201035	0	0	0	0	0	0	0	0	0	0	0	0	0	0	0
Khdc1c	0	0	0.00173833	0	0	0	0	0	0	0	0	0	0.00168573	0	0	0	0	0	0	0	0	0	0.00140112	0	0	0	0	0	0	0	0	0	0	0	0	0	0	0	0	0	0	0	0	0	0	0	0	0	0
Khdc1b	0	0	0	0.000704094	0.000994748	0	0.00116047	0	0	0	0	0	0.000804293	0	0	0.00128737	0	0	0	0	0	0	0.00372032	0	0.000708509	0	0	0.000518518	0.00426153	0	0	0	0.00140171	0.00224702	0	0	0.00342462	0.00204575	0.00231148	0	0	0	0	0	0	0	0	0	0
Kcnq5	0.0707579	0.198392	0.161231	0.301748	0.328498	0.0396157	0.0957347	0.168295	0.187156	0.194916	0.107575	0.13603	0.245379	0.307496	0.303351	0.0124386	0.0549371	0.0751389	0.128843	0.0311964	0.0795837	0.115734	0.143695	0.200683	0.155723	0.0250577	0.0755486	0.1742	0.18547	0.187065	0	0.491372	0.268452	0.40667	0.534617	0.068552	0.111026	0.118988	0.181938	0.20751	0.0186589	0.0229217	0.0635526	0.0454758	0.0580303	0.0243081	0.0571933	0.0949106	0.19156
Gm26580	0	0	0.0114894	0.0106731	0.011277	0.00112782	0.0014149	0.0257259	0.00454563	0.00236504	0	0.0152653	0.0182105	0.0349534	0.0245616	0	0	0.00304873	0	0.00400782	0	0.0139492	0.0138287	0.0129828	0.0131505	0	0.0031258	0.0150264	0.0120269	0.00899979	0	0.0961686	0.0190461	0.00914927	0.0298064	0	0.0681793	0.0212022	0.00404348	0.007105	0	0.00292902	0	0	0	0	0	0	0.00385765
Rims1	0	0.0271919	0.0293214	0.0249775	0.0471852	0.000519361	0.00636451	0.00656388	0.0102404	0.00817999	0.00601945	0.0566387	0.058537	0.0884129	0.0592873	0	0.00212843	0.00857954	0	0	0.00673068	0.0228151	0.0163264	0.026168	0.0240633	0.00251029	0.0573656	0.0289714	0.0370022	0.0337113	0	0.394573	0.0914416	0.110778	0.0974865	0.0106735	0.0662188	0.0240538	0.0379071	0.0314067	0.00154534	0	0	0	0.00400489	0.00172597	0.00390481	0.0040322	0.00627861
4933415F23Rik	0	0	0	0	0	0	0	0	0	0	0	0	0	0	0	0	0	0	0	0	0	0	0	0	0	0	0	0	0	0	0	0	0	0	0	0	0	0	0	0	0	0	0	0	0	0	0	0	0
Gm27028	0	0	0	0	0	0	0	0.00339416	0	0	0	0	0	0	0	0	0	0	0.00592655	0	0	0	0	0	0	0	0	0	0	0.00123681	0	0	0	0	0	0	0	0	0	0	0	0	0	0	0	0	0	0	0
Gm29107	0.0141028	0.00804942	0.00994558	0.0163434	0.015469	0.0127849	0.00447034	0.00763698	0.017929	0.006481	0.0213612	0.00183747	0.0156149	0.0124171	0.0335101	0.0129603	0.0053295	0.0040381	0.0391465	0.0206943	0.015604	0.0275585	0.012229	0.0318809	0.0179731	0.0126988	0.00839945	0.0157784	0.020299	0.0295482	0	0	0.0147434	0.0154911	0.0288603	0	0.0292662	0.0170938	0.038062	0.024	0.0175882	0.00641422	0.0163355	0.021201	0.0126527	0.0157197	0	0.00620234	0.0231701
Ogfrl1	0.239939	0.110004	0.174359	0.147188	0.275581	0.229599	0.176447	0.174197	0.166835	0.167791	0.341162	0.216717	0.178468	0.255539	0.220948	0.146458	0.165974	0.109481	0.121203	0.251325	0.278668	0.24908	0.196869	0.238742	0.27289	0.265436	0.229763	0.183915	0.193833	0.218963	0	0.144626	0.239209	0.266052	0.364484	0.341622	0.26696	0.160526	0.156301	0.264728	0.161996	0.207815	0.12564	0.165317	0.23989	0.191296	0.244832	0.191809	0.245498
Gm28822	0	0	0	0	0	0	0	0	0	0	0	0	0	0	0	0	0	0	0	0	0	0	0	0	0	0	0	0	0	0	0	0	0	0	0	0	0	0	0	0	0	0	0	0	0	0	0	0	0
B3gat2	0.00962256	0.0311249	0.03107	0.0171777	0.0199251	0.0109767	0.0411829	0.0259746	0.0208352	0.017765	0.00930665	0.0383885	0.0238713	0.0174959	0.0264139	0.00998765	0.0470875	0.0238604	0.0241134	0	0.0025832	0.0540936	0.0267443	0.0201635	0.0148226	0.0173378	0.0455506	0.0249696	0.0181353	0.0123439	0	0.0522488	0.0146798	0.0136427	0.0118635	0	0.0447823	0.03295	0.00502696	0.0240085	0.00855265	0.0300896	0.0191223	0.0179002	0.0119618	0.00975671	0.0195314	0.00453848	0.00654794
Smap1	1.16326	1.38133	1.14838	1.35802	1.40072	0.951484	1.13909	1.04245	0.931669	1.10928	1.04384	1.15544	0.996387	1.19468	1.31087	1.04817	1.0329	1.11826	1.0554	1.21333	0.865127	1.0452	1.02883	1.19589	1.22153	0.838564	1.21485	1.09468	1.22718	1.3076	1.64379	0.583786	1.19779	1.28402	1.35983	0.975524	1.37189	1.06383	1.27699	1.4422	1.01928	1.07934	1.01882	0.774895	1.09253	0.979223	1.17419	1.02569	0.988383
Sdhaf4	0.51729	0.144785	0.26395	0.352503	0.38058	0.514943	0.325925	0.321143	0.422942	0.510808	0.475169	0.260132	0.225232	0.340372	0.397551	0.568851	0.418149	0.318741	0.54287	0.697852	0.461579	0.313337	0.262325	0.418158	0.466741	0.596047	0.272823	0.281198	0.464207	0.432568	0	0.131195	0.177785	0.2633	0.310897	0.487988	0.230879	0.249423	0.421996	0.35885	0.629003	0.343318	0.343685	0.559742	0.575913	0.515874	0.400598	0.371083	0.492429
Fam135a	0.169235	0.325737	0.16827	0.213143	0.256231	0.263473	0.245534	0.160207	0.246105	0.193746	0.248208	0.219713	0.140046	0.121166	0.167307	0.309177	0.220523	0.300935	0.188474	0.313342	0.220258	0.125624	0.107019	0.129701	0.169943	0.22475	0.118247	0.142705	0.138575	0.161166	0	0.297145	0.213132	0.258086	0.307397	0.276474	0.102982	0.0761929	0.12908	0.128746	0.241278	0.237625	0.258012	0.205475	0.22761	0.225399	0.166612	0.171984	0.180607
Col9a1	0	0	0.00277387	0.00108592	0.00221979	0	0	0	0	0	0	0	0.0027452	0	0.00837004	0	0	0	0	0	0	0	0.00128802	0	0	0	0	0.000427733	0	0.00204397	0	0	0.00277335	0.00368427	0.0116946	0	0	0	0.00570099	0.00163877	0	0	0	0	0	0	0	0	0
Col19a1	0	0	0.000752743	0	0	0	0	0	0	0	0	0	0	0	0	0	0	0	0	0	0	0	0	0	0	0	0	0	0	0.000948074	0	0	0	0	0	0	0	0	0	0	0	0	0	0	0	0	0	0	0
Lmbrd1	0.313631	0.176884	0.178288	0.373128	0.407018	0.232435	0.211386	0.203875	0.272429	0.272304	0.270572	0.159185	0.167738	0.268232	0.314929	0.235229	0.248269	0.340148	0.346716	0.278173	0.185432	0.095368	0.109065	0.187489	0.185694	0.192105	0.14152	0.146473	0.202234	0.18252	0	0.481842	0.259073	0.4016	0.393839	0.220057	0.102586	0.137794	0.264036	0.253994	0.253342	0.235942	0.253195	0.226379	0.256058	0.207778	0.175633	0.164087	0.193408
Gm28237	0	0	0	0	0	0	0	0	0	0	0	0	0	0	0	0	0	0	0	0	0	0	0	0	0	0	0	0	0	0	0	0	0	0	0	0	0	0	0	0	0	0	0	0	0	0	0	0	0
Gm29414	0	0	0	0	0	0	0	0	0	0	0	0	0	0	0	0	0	0	0	0	0	0	0	0	0	0	0	0	0	0	0	0	0	0	0	0	0	0	0	0	0	0	0	0	0	0	0	0	0
Adgrb3	0	0	0.00259593	0.00322687	0.00157312	0.00348849	0.00723932	0.0165417	0.0104414	0.00354768	0	0	0.00254637	0	0	0.001459	0.00162394	0	0.0226021	0.00250804	0.00181601	0.00728562	0.00346329	0.00278735	0.00192867	0.00336774	0.00789953	0.00414019	0	0.00536304	0	0	0.000521651	0	0	0	0	0	0	0	0.00226787	0	0.00685923	0	0.00352748	0.00141501	0.00226641	0.00842586	0.00410744
4931408C20Rik	0	0	0	0	0	0	0	0	0	0	0	0	0	0	0	0	0	0	0	0	0	0	0	0	0	0	0	0	0	0	0	0	0	0	0	0	0	0	0	0	0	0	0	0	0	0	0	0	0
Gm5524	0	0	0	0	0	0	0	0	0	0	0	0	0	0	0	0	0	0	0	0	0	0	0	0	0	0	0	0	0	0	0	0	0	0	0	0	0	0	0	0	0	0	0	0	0	0	0	0	0
Gm597	0	0	0	0	0	0	0	0	0	0	0	0	0	0	0	0	0	0	0	0	0	0	0	0	0	0	0	0	0	0	0	0	0	0	0	0	0	0	0	0	0	0	0	0	0	0	0	0	0
Gm9898	0	0	0	0	0	0	0	0	0	0	0	0	0	0	0	0	0	0	0	0	0	0	0	0	0	0	0	0	0	0	0	0	0	0	0	0	0	0	0	0	0	0	0	0	0	0	0	0	0
Phf3	2.13202	2.0004	1.52032	1.59479	1.51603	1.91009	2.05508	2.21374	1.75155	2.12606	1.85373	2.09469	1.65781	1.65924	1.9395	1.8584	2.16176	2.2054	1.90719	2.02446	1.79162	1.85717	1.55417	1.38443	1.70744	1.8672	1.62473	1.80643	1.46178	1.86748	4.93137	2.73399	1.86863	1.73359	1.91572	1.80436	1.81121	1.50371	1.38328	1.71219	1.81581	2.07619	2.17155	1.80875	1.94845	1.75188	1.9118	1.71665	1.585
Ptp4a1	0.94479	0.865573	0.866101	1.07076	0.932678	0.769752	0.744671	0.691016	0.789893	0.883288	0.904365	0.934671	0.709416	0.973563	0.826705	0.767017	0.735295	0.781804	0.806159	0.843575	0.940263	0.785111	0.719076	0.875484	0.824093	0.870645	0.842116	0.667566	0.885975	0.868774	2.46569	0.914757	0.703265	1.0198	0.95035	0.969486	0.779885	0.685106	0.782452	0.782369	0.686665	0.669512	0.674564	0.858904	0.773759	0.76574	0.690555	0.69593	1.00718
Gm29669	0	0	0	0	0	0	0	0	0	0	0	0	0	0	0	0	0	0	0	0	0	0	0	0	0	0	0	0	0	0	0	0	0	0	0	0	0	0	0	0	0	0	0	0	0	0	0	0	0
Gm28644	0	0	0	0	0	0	0	0	0	0	0	0	0	0	0	0	0	0	0	0	0	0	0	0	0	0	0	0	0	0	0	0	0	0	0	0	0	0	0	0	0	0	0	0	0	0	0	0	0
4931428L18Rik	0	0	0	0	0	0	0	0	0	0	0	0	0	0	0	0	0	0	0	0	0	0	0	0	0	0	0	0	0	0	0	0	0	0	0	0	0	0	0	0	0	0	0	0	0	0	0	0	0
Gm29128	0	0	0	0	0	0	0	0	0	0	0	0	0	0	0	0	0	0	0	0	0	0	0	0	0	0	0	0	0	0	0	0	0	0	0	0	0	0	0	0	0	0	0	0	0	0	0	0	0
Lgsn	0	0	0	0	0	0	0	0	0	0	0	0	0	0	0	0	0	0	0	0	0	0	0	0	0	0	0	0	0	0	0	0	0	0	0	0	0	0	0	0	0	0	0	0	0	0	0	0	0
Pih1d3	0	0	0	0	0	0	0	0	0	0	0	0	0	0	0	0	0	0	0	0	0	0	0	0	0	0	0	0	0	0	0	0	0	0	0	0	0	0	0	0	0	0	0	0	0	0	0	0	0
Khdrbs2	0.138612	0.145454	0.0484367	0.113903	0.113709	0.183483	0.145759	0.143103	0.114849	0.140587	0.0957055	0.0958292	0.0439109	0.0845801	0.0900705	0.18952	0.220851	0.186076	0.128124	0.161656	0.0673469	0.0327132	0.0102246	0.0279502	0.0257597	0.0651039	0.0297657	0.0264884	0.0285453	0.0344598	0	0.554909	0.0719635	0.0958417	0.116951	0.0816205	0.00548303	0.0242514	0.0664086	0.0608952	0.131224	0.148202	0.143462	0.0680059	0.0735185	0.103993	0.0775128	0.0644746	0.0864564
Gm5415	0	0	0	0	0.00121233	0	0	0	0	0.00151626	0	0	0.00112767	0	0.00115667	0	0	0	0	0	0	0	0	0	0	0	0	0	0	0.00178407	0	0	0	0	0	0	0	0	0	0	0	0	0	0.00543661	0	0	0	0	0
Gm37724	0	0	0	0	0	0.00240344	0	0	0	0	0	0	0	0	0	0	0.00223111	0	0	0	0	0	0	0	0	0	0	0	0	0.00143521	0	0	0	0.00173014	0.00295751	0	0.00469116	0.000786775	0	0	0.00338712	0	0	0	0.00441072	0.00163063	0	0	0
Gm37591	0	0	0	0	0	0	0	0	0	0	0	0	0	0	0	0	0	0	0	0	0	0	0	0	0	0	0	0	0	0	0	0	0	0	0	0	0	0	0	0	0	0	0	0	0	0	0	0	0
Prim2	0.073913	0.0647003	0.0753494	0.117644	0.104415	0.0933483	0.08884	0.0641368	0.0729975	0.12312	0.0867298	0.0914077	0.0552462	0.0851006	0.0690189	0.0898849	0.065748	0.0594418	0.0857461	0.10395	0.313341	0.272355	0.285789	0.322857	0.297059	0.305305	0.227752	0.270567	0.263008	0.291283	0	0	0.0699264	0.0829797	0.0865564	0.100203	0.120154	0.121246	0.0868986	0.0864342	0.0791538	0.0879885	0.105627	0.0873975	0.0837434	0.203576	0.177385	0.184827	0.213073
Rab23	0.21463	0.118343	0.0862877	0.112993	0.139405	0.137108	0.154356	0.0981354	0.101678	0.141972	0.170622	0.0744406	0.0712976	0.0402777	0.100866	0.171583	0.16419	0.0932722	0.118133	0.104872	0.157673	0.116017	0.0912361	0.131108	0.13296	0.170644	0.0958325	0.0844566	0.133899	0.164696	0	0	0.106147	0.105767	0.137519	0.125306	0.0610137	0.0578442	0.0655476	0.127823	0.142276	0.129195	0.217092	0.153972	0.104255	0.159161	0.103135	0.116804	0.119133
Bag2	0.32287	0.411298	0.255804	0.300314	0.414048	0.449636	0.45841	0.379623	0.538095	0.636036	0.381069	0.387027	0.308108	0.471356	0.469926	0.470728	0.464419	0.400636	0.482134	0.467974	0.519588	0.396042	0.371464	0.536164	0.575555	0.331137	0.274463	0.24762	0.377466	0.347868	1.64379	0.349204	0.297734	0.346086	0.340916	0.386467	0.311579	0.303106	0.429045	0.353465	0.485738	0.311801	0.295544	0.409624	0.480659	0.470815	0.458588	0.488397	0.646701
Zfp451	0.779386	0.634042	0.886042	0.804788	0.832464	0.893248	1.06242	0.879796	0.984736	0.848	0.755719	0.947908	0.924951	0.867568	0.765464	1.01287	1.22615	0.870941	0.970622	0.860091	0.750147	0.771399	0.62768	0.670516	0.616653	0.800044	0.674336	0.774219	0.63025	0.64876	0	0.586353	1.06597	1.02555	1.10499	0.566563	0.738001	0.709233	0.543403	0.567447	0.839608	0.965561	0.802179	0.777914	0.873076	0.847199	1.00849	0.830826	0.917254
Bend6	0	0	0.000679762	0.00217563	0.0065679	0.00576496	0.00568515	0	0.00952919	0.00727312	0	0.00184163	0.00297455	0.00763952	0.00409523	0.0126709	0.0029672	0	0	0	0	0.00473343	0.00219953	0.00989426	0.00357517	0.00619441	0.00173749	0.00164723	0.00252067	0	0	0	0.00176535	0.00804012	0.00480787	0.00629379	0	0.0038435	0.00301452	0.00541222	0.00362745	0.00934597	0	0.00457704	0.00279004	0.00116026	0	0	0
Dst	1.47948	2.74398	2.33801	1.96677	2.00174	0.911651	1.90812	2.43137	1.81421	1.54879	1.06426	2.43081	2.33675	2.11131	2.04907	0.820875	1.49554	2.13564	1.4607	1.23473	0.714327	1.37531	1.60203	1.56818	1.33687	0.871894	1.28338	1.87655	1.50744	1.2634	2.46569	3.73056	3.97992	3.34163	3.50944	1.05112	1.39496	1.66128	1.33789	1.36549	0.67807	1.09328	1.39364	0.946492	0.870371	0.662853	1.12868	1.43675	1.52111
Gm37958	0	0	0	0	0	0	0	0	0	0	0	0	0	0	0	0	0	0	0	0	0	0	0	0	0	0	0	0	0	0	0	0	0	0	0	0	0	0	0	0	0	0	0	0	0	0	0	0	0
Gm37233	0	0	0.0145284	0.0215444	0.0250942	0.0119212	0.00684278	0.0129327	0.0141703	0.00523129	0.00706355	0.002506	0.00986156	0.0290549	0.0146466	0.0109777	0	0.00400619	0.00574712	0.0308108	0.00515897	0.0201923	0.0108196	0.0197147	0.024292	0.0103768	0.0134759	0.0170214	0.0206071	0.0134528	0	0	0.0120178	0.00550992	0.0309681	0.0159531	0.00829744	0.0127844	0.0120145	0.0123185	0.0127208	0.00742786	0	0.0395645	0.0129812	0.00438802	0.0147602	0.00468152	0
Ccdc115	0.213884	0.155302	0.165947	0.187292	0.299935	0.169291	0.145288	0.155611	0.165951	0.219058	0.14171	0.126558	0.150721	0.221247	0.215509	0.147066	0.103747	0.132864	0.195154	0.190636	0.173779	0.128593	0.187013	0.191896	0.236961	0.156264	0.148379	0.14452	0.222097	0.171772	0	0.0535424	0.176584	0.212404	0.239197	0.144218	0.192243	0.204813	0.25377	0.27095	0.188438	0.14469	0.148944	0.206519	0.226976	0.188891	0.146223	0.140045	0.18777
Gm28306	0	0	0	0	0	0	0	0	0	0	0	0	0	0	0	0	0	0	0	0	0	0.00344845	0	0	0	0	0	0	0	0	0	0	0	0	0	0	0	0	0	0	0	0	0	0	0	0	0	0	0
Imp4	0.332674	0.411495	0.495031	0.424074	0.466859	0.395675	0.446124	0.526201	0.361239	0.457176	0.435636	0.45794	0.570211	0.544173	0.626139	0.406877	0.354058	0.40066	0.352866	0.423504	0.509153	0.571567	0.642865	0.639626	0.641873	0.426141	0.541625	0.541316	0.50717	0.472182	0	0.16127	0.494094	0.395393	0.476573	0.645695	0.56491	0.626037	0.537848	0.578927	0.409649	0.439472	0.354891	0.385213	0.482208	0.488364	0.489164	0.570135	0.394364
Ptpn18	0.0135397	0.0237789	0.0357924	0.0209802	0.0406497	0.0175292	0.0229653	0.00834411	0.0115844	0.0283764	0.0167262	0.0390906	0.0405923	0.00659546	0.0313663	0.0208089	0.0245782	0.0452315	0.0394373	0.026234	0.0194198	0.0526697	0.0488147	0.0279234	0.0289175	0.0310402	0.0175552	0.053064	0.027743	0.0381011	0	0	0.0434137	0.027157	0.0429878	0.0085924	0.0612956	0.0467697	0.0229464	0.00731178	0.0107967	0.0263737	0.0417746	0.0109221	0.0232971	0.0201395	0.0237715	0.037434	0.0358989
4930568A12Rik	0	0	0.000702212	0	0	0	0	0	0	0	0	0.00271195	0	0	0	0	0	0	0	0	0	0	0	0	0	0	0.00344549	0	0	0.0024886	0	0	0	0	0	0	0	0.000985995	0.00235431	0	0	0	0	0	0	0	0	0	0
Prss39	0	0	0	0.00117602	0	0	0	0	0	0	0	0	0	0	0	0	0	0	0	0	0	0	0	0	0	0	0	0	0	0	0	0	0	0	0	0	0	0	0	0	0	0	0	0	0	0	0	0	0
Cfc1	0	0	0	0.00285209	0	0	0	0.00225807	0	0	0	0	0	0	0	0	0	0	0	0	0	0	0	0	0	0	0	0	0	0	0	0	0	0	0	0	0	0	0	0	0	0.00328821	0	0	0	0	0	0	0
Prss40	0	0	0	0	0	0.000887345	0	0	0	0	0	0	0	0	0	0	0	0	0	0	0	0	0.0014806	0	0	0	0	0	0	0	0	0	0	0	0	0	0	0	0	0	0	0	0	0	0	0	0	0	0
1700101I19Rik	0	0	0	0	0	0	0	0	0	0	0	0	0	0	0	0	0	0	0	0	0	0	0	0	0	0	0	0	0	0	0	0	0	0	0	0	0	0	0	0	0	0	0	0	0	0	0	0	0
Amer3	0	0	0	0	0	0	0	0	0	0	0	0	0	0	0	0	0	0	0	0	0	0	0	0	0	0	0	0	0	0	0	0	0	0	0	0	0	0	0	0	0	0	0	0	0	0	0	0	0
Arhgef4	0.0382521	0.00972212	0.0110852	0.0161502	0.00998621	0.0146854	0.0106978	0.0200604	0.0160217	0.0174904	0	0.0346561	0.0198749	0.00869967	0.00950669	0.0229209	0.0208035	0.0176008	0.00981871	0.0407471	0.00421895	0.010874	0.00601039	0.0070731	0.0113959	0.00627582	0.0106979	0.00313255	0.00741828	0.00593778	0	0	0.00616826	0.0163376	0.0101656	0.0107604	0.0310953	0.015499	0.0106473	0.0125127	0.00861812	0	0	0.0449728	0.0134335	0.00975095	0.0124858	0.00910548	0.0166722
Gm38336	0.0321722	0	0.00919255	0.021399	0.00349889	0.00762572	0.00851583	0.00211172	0.0329227	0.00151123	0.0209247	0.00870108	0.00783621	0.00741087	0.00427129	0.0124723	0.0107232	0.027063	0.00692154	0.0146471	0.00229163	0.00748596	0.0100421	0.0182894	0.00436204	0.0118689	0.0292401	0.00820494	0.0204642	0.0176321	0	0	0.0110348	0.0264157	0.0190335	0	0.0260116	0.00684155	0.010701	0.0064185	0.0135757	0	0.0076839	0.0245862	0.00761388	0.0086849	0.00474843	0.00401696	0.0190716
Fam168b	0.667294	0.628134	0.607798	0.527259	0.522024	0.510161	0.636422	0.597512	0.52621	0.499076	0.499382	0.609619	0.497342	0.48912	0.448889	0.513085	0.614094	0.638694	0.520599	0.505581	0.502575	0.479942	0.429605	0.448761	0.467696	0.483322	0.478429	0.512029	0.407227	0.421981	0	0.552954	0.695884	0.614474	0.658736	0.420695	0.534026	0.479738	0.388446	0.515981	0.465663	0.58336	0.671793	0.587241	0.412843	0.483795	0.554841	0.508496	0.497445
Plekhb2	0.077398	0.176994	0.0860906	0.0888725	0.0855038	0.046106	0.0537769	0.0573612	0.0530494	0.0564458	0.0699655	0.0537206	0.0490044	0.0720969	0.0471113	0.0434084	0.0864139	0.146822	0.0706688	0.064279	0.071859	0.0660672	0.0471728	0.0820528	0.0521089	0.0471422	0.0502698	0.0346685	0.031041	0.0310399	0	0.104498	0.0700209	0.0803211	0.0938698	0.0740038	0.0362602	0.0349597	0.0566375	0.0601429	0.0271493	0.0507348	0.0591488	0.0338669	0.0304461	0.0411749	0.0546961	0.0862989	0.079159
Gm37068	0	0	0	0	0	0	0	0	0	0	0	0	0	0	0	0	0	0	0	0	0	0	0	0	0	0	0	0	0	0	0	0	0	0	0	0	0	0	0	0	0	0	0	0	0	0	0	0	0
Gm28415	0	0	0	0	0	0	0	0	0	0	0	0	0	0	0	0	0	0	0	0	0	0	0	0	0	0	0	0	0	0	0	0	0	0	0	0	0	0	0	0	0	0	0	0	0	0	0	0	0
1110002O04Rik	0	0	0	0	0	0	0	0	0	0	0	0	0	0	0	0	0	0	0	0	0	0	0	0	0	0	0	0	0	0	0	0	0	0	0	0	0	0	0	0	0	0	0	0	0	0	0	0	0
Gm37146	0	0	0	0	0	0	0	0	0	0	0	0	0	0	0	0	0	0	0	0	0	0	0	0	0	0	0	0	0	0	0	0	0	0	0	0	0	0	0	0	0	0	0	0	0	0	0	0	0
Gm33222	0	0	0	0	0	0	0	0	0	0	0	0	0	0	0	0	0	0	0	0	0	0	0	0	0	0	0	0	0	0	0	0	0	0	0	0	0	0	0	0	0	0	0	0	0	0	0	0	0
4930535G08Rik	0	0	0	0	0	0	0	0	0	0	0	0	0	0	0	0	0	0	0	0	0	0	0	0	0	0	0	0	0	0	0	0	0	0	0	0	0	0	0	0	0	0	0	0	0	0	0	0	0
Hs6st1	0.219486	0.270873	0.189716	0.177054	0.236437	0.102481	0.181061	0.195635	0.145624	0.224369	0.0871327	0.123892	0.167529	0.123179	0.163667	0.114457	0.180681	0.194035	0.199761	0.237754	0.0853976	0.146326	0.129032	0.102682	0.156955	0.0986714	0.120138	0.141858	0.122549	0.139044	0	0.471601	0.171608	0.15141	0.214885	0.0996897	0.0953351	0.142042	0.110221	0.159695	0.109218	0.118628	0.192669	0.131009	0.18155	0.125336	0.12052	0.162474	0.178194
Gm37335	0	0	0	0.000983351	0	0	0	0.00481931	0.00481036	0	0	0	0	0	0	0	0	0.00379933	0	0.00404586	0.00230798	0	0	0	0	0	0	0	0	0	0	0	0.00158171	0	0	0	0	0	0	0	0	0.00243336	0	0	0	0	0	0	0
Gm33280	0	0	0.00283169	0.00195951	0.00069547	0.00168808	0.00118285	0	0.00690041	0.00417281	0	0.00630383	0.000710389	0	0.00409961	0	0	0	0	0	0	0.000965136	0.00568343	0.00250659	0	0	0.00271191	0.000931409	0	0	0	0	0.00156329	0	0	0	0	0.00855668	0.00623957	0.00163213	0	0.00256874	0	0	0	0.00175198	0	0	0
Uggt1	0.265655	0.26983	0.409689	0.499512	0.48452	0.34854	0.438225	0.446365	0.427098	0.441886	0.461836	0.446373	0.385197	0.49958	0.459999	0.287194	0.354061	0.330454	0.225061	0.307015	0.436609	0.561222	0.47113	0.548856	0.504856	0.354338	0.389894	0.455595	0.434398	0.382005	0.821895	0.626009	0.450953	0.600894	0.580098	0.633378	0.557122	0.41532	0.320985	0.517104	0.338096	0.3021	0.333713	0.349079	0.412173	0.396487	0.406149	0.479189	0.387719
Neurl3	0	0.0060992	0.00302265	0.0152361	0.00259751	0.000770878	0.00839584	0.00258785	0	0	0	0	0	0.00459009	0	0	0.00270846	0.00458958	0	0.00339871	0.00235535	0.00644868	0	0.00576828	0.00147944	0	0	0.000966814	0.000922956	0	0	0	0	0	0	0	0.00450344	0	0.00220163	0.00197297	0.00145084	0	0	0	0	0.00815824	0.00127755	0.00618429	0
Arid5a	0.196035	0.254139	0.161468	0.142918	0.0448103	0.0109135	0.0595681	0.0374277	0.0294302	0.00487634	0.0150091	0.0398173	0.0455929	0.0523131	0.0137556	0.0247424	0.0558873	0.11763	0.0307095	0.00763983	0.00314016	0.0213306	0.0446628	0.0176341	0.0123628	0.0168612	0.0461301	0.0490027	0.0495378	0.0220922	0	0.0522488	0.0492437	0.0493136	0.0346801	0.014365	0.0186137	0.0388533	0.0471949	0.00500744	0.00846117	0.0371196	0.0384082	0.0445616	0.010151	0.0235246	0.0345882	0.0454052	0.0502971
4930403P22Rik	0.0220157	0.0248078	0.0110075	0.0207637	0.0114561	0.00669649	0.00657679	0.00588222	0.0128923	0.0120653	0.00708994	0.0175714	0.00644049	0.00435067	0.0237284	0.00605728	0.0242442	0.0157935	0.0117953	0.00939003	0.0104619	0.00946436	0.00455592	0.00946377	0.0171831	0.00484257	0.0162194	0.00750759	0.0113036	0.00412111	0	0	0.0055986	0.0126248	0.0123677	0	0.0461482	0.00579168	0.00755993	0.012271	0.00636435	0.00887161	0.00961272	0.0305845	0.00609263	0.0142691	0.0114313	0.00884049	0.0124546
Kansl3	0.557418	0.743721	0.579753	0.496108	0.440953	0.598093	0.790278	0.886104	0.583767	0.588161	0.502273	0.703508	0.601477	0.47278	0.547283	0.480233	0.8163	0.864191	0.486963	0.607726	0.521378	0.619559	0.538104	0.42639	0.479681	0.557945	0.679703	0.617571	0.470492	0.492197	0.821895	1.08408	0.680466	0.529782	0.579885	0.44112	0.504001	0.550332	0.341331	0.431514	0.53836	0.630148	0.89343	0.594341	0.611655	0.479154	0.750031	0.707196	0.512895
Fer1l5	0	0	0	0	0	0	0	0	0	0	0	0	0.00160404	0.00176973	0	0	0	0	0	0	0	0	0	0	0	0	0	0	0	0	0	0	0	0	0	0	0.0301265	0	0	0	0	0	0	0	0	0	0	0	0
Lman2l	0.262047	0.574803	0.289031	0.211844	0.313677	0.247283	0.312123	0.287346	0.212549	0.346594	0.176994	0.26538	0.252738	0.19347	0.289491	0.254308	0.315134	0.459564	0.265481	0.370847	0.253115	0.210746	0.243166	0.206241	0.283902	0.277262	0.266775	0.250026	0.222224	0.269582	0	0.740229	0.253562	0.187901	0.29827	0.224365	0.309385	0.287726	0.168855	0.282192	0.273656	0.362758	0.317615	0.221353	0.331875	0.235655	0.258551	0.334211	0.170139
Cnnm4	0.104024	0.0572055	0.0486372	0.0451957	0.066155	0.0330644	0.013868	0.0184425	0.00773438	0.0238619	0.0384225	0.0205315	0.0407791	0.0292751	0.0519608	0.0289678	0.0171371	0.00902173	0.0297698	0.0295547	0.0189651	0.0194803	0.0179537	0.0349145	0.0357913	0.0652104	0.0250306	0.0403997	0.038076	0.0492424	1.64379	0	0.058548	0.0652186	0.099341	0.023083	0.00469116	0.0275845	0.0458145	0.0383008	0.0343101	0.0195834	0	0.0469778	0.0283453	0.0196258	0.0297798	0.012687	0.0127689
Cnnm3	0.124213	0.197167	0.158024	0.128452	0.160619	0.176629	0.218853	0.218047	0.211949	0.233554	0.145564	0.195252	0.185169	0.170063	0.160801	0.204832	0.188329	0.189284	0.200569	0.192669	0.213887	0.215701	0.222035	0.207633	0.231967	0.186285	0.214775	0.209448	0.192963	0.190519	0	0.0535424	0.155785	0.143022	0.20071	0.157826	0.251676	0.187975	0.154392	0.166793	0.168056	0.220303	0.338604	0.207158	0.258794	0.211694	0.209934	0.248	0.255858
Gm38033	0	0	0.00144858	0.00135225	0.000861984	0.00243964	0.00264239	0	0	0.00375755	0.00294616	0.00920397	0.000535213	0.00472404	0.00531499	0.00136114	0.00385241	0	0	0	0.00419591	0	0.00173043	0.00163055	0.00122606	0.0024081	0.00831962	0.0031792	0	0.00779178	0	0	0.000521651	0.00435036	0	0	0.00397643	0.00638772	0.00244418	0.00227266	0.00174677	0	0	0.00797635	0.00354945	0	0	0.0099241	0
Ankrd23	0	0	0.00232446	0.00062516	0.00330807	0.0071962	0.00542074	0.0123385	0.00435662	0.00214827	0.0115872	0.0049078	0.0117187	0.00214164	0.00313005	0.00329293	0.00771084	0	0.0152185	0	0.00527019	0.00340467	0.00494196	0.00982601	0.00571053	0.00216141	0.00414446	0.00356396	0.00341518	0.000804476	0	0	0.00470298	0.0041528	0.00723224	0	0.016755	0.0040899	0.00562809	0.00264676	0.00591065	0.0126915	0	0.00522267	0.0254162	0.00456501	0.0172514	0.00926614	0
Gm42417	0	0	0.00168288	0.00216891	0.00705645	0.00352002	0.0131759	0.0106454	0.0165372	0.00533613	0.00690091	0.00668366	0.00402016	0.00932934	0.00570604	0.00137567	0.00755342	0.00700144	0	0.00323156	0	0.00816849	0.0140473	0.00430996	0.00458254	0.00872587	0.0036132	0.00570191	0.00317332	0.00408113	0	0	0	0	0.00522148	0	0	0.00779686	0.00504461	0.00118482	0.0108656	0.0114159	0	0.0166145	0.00231743	0	0.00252369	0.00913335	0.00960307
Ankrd39	0.158993	0.234611	0.161429	0.136244	0.160228	0.308373	0.291417	0.35748	0.321108	0.336714	0.289298	0.269522	0.229078	0.249364	0.271259	0.281023	0.231758	0.26386	0.269014	0.325576	0.236848	0.259549	0.322625	0.252548	0.252987	0.326968	0.295973	0.238282	0.216913	0.294234	0	0.647722	0.120567	0.165222	0.132796	0.305575	0.262714	0.324674	0.246751	0.355091	0.24118	0.296909	0.348878	0.197486	0.287963	0.262364	0.249565	0.314742	0.207018
Sema4c	0.200458	0.0811311	0.0794581	0.0970374	0.114748	0.126309	0.124064	0.118334	0.132663	0.112287	0.128811	0.10109	0.0924186	0.0818384	0.0799659	0.118262	0.137224	0.17366	0.138066	0.145077	0.0723869	0.106575	0.104721	0.104079	0.126722	0.16797	0.156791	0.14601	0.178093	0.171218	0	0.0535424	0.122551	0.120714	0.141932	0.159332	0.101851	0.104104	0.0638563	0.127994	0.136541	0.152715	0.106253	0.102404	0.185641	0.117904	0.104128	0.104405	0.103133
Fam178b	0	0	0.00387876	0	0.00173468	0.00695055	0.0126138	0	0.00338208	0.00226372	0.00717516	0.0104281	0.00561681	0	0.00120289	0.00561416	0.0153243	0.00662035	0	0.0174449	0.0048872	0.033767	0.0371754	0.0283579	0.020417	0.0119145	0.0124038	0.0133086	0.014717	0.0150785	0	0	0.00145574	0	0.00538587	0.00969969	0.0269084	0.024767	0.0198285	0.0237651	0.00938273	0.00357925	0.0211419	0	0.00885165	0.0126316	0.00611885	0	0.00624348
Cox5b	3.38033	3.4746	3.67313	3.1517	3.77067	3.51446	3.29328	3.39691	2.82443	3.21715	3.87113	3.62173	4.02675	3.32711	3.55235	3.44256	3.21677	3.05883	2.53282	2.87736	4.21441	4.95466	5.26509	4.39314	4.67195	3.97202	5.25864	4.62859	4.31143	4.70832	4.93137	2.40223	3.23132	2.86995	3.22549	4.76458	4.99234	5.5398	5.04515	5.02598	3.48961	3.02254	3.12302	2.82688	3.23079	3.62958	3.6735	3.5183	3.29943
Actr1b	0.435589	0.340165	0.42248	0.412905	0.384348	0.354892	0.357322	0.417069	0.288313	0.366737	0.321711	0.384529	0.328833	0.375624	0.323542	0.367843	0.354107	0.427456	0.362051	0.308158	0.377763	0.422922	0.453985	0.443418	0.387388	0.455753	0.481385	0.394492	0.44208	0.414494	0.821895	0.522873	0.373225	0.367916	0.3639	0.375146	0.281871	0.341462	0.421589	0.393792	0.296298	0.429097	0.433539	0.328449	0.296021	0.379861	0.345126	0.377077	0.386228
4933424G06Rik	0	0	0.000850976	0	0.000596477	0	0	0	0	0	0	0	0	0.0021635	0	0	0	0	0	0	0	0	0.000639492	0	0	0.003521	0.00191357	0.00064508	0	0	0	0	0	0	0	0	0	0	0.00301452	0	0	0	0	0.00674338	0.00338835	0	0	0	0
Gm33533	0	0	0	0	0	0	0	0.00440323	0	0	0	0	0	0	0	0	0	0	0	0	0	0	0	0	0	0	0	0	0	0	0	0	0	0	0	0	0	0	0	0	0	0	0	0	0	0	0	0	0
Zap70	0	0	0	0	0	0	0	0	0	0	0	0	0.000795125	0	0	0	0	0	0	0	0	0	0.00118256	0	0	0	0	0.000882318	0	0	0	0	0	0	0	0	0	0	0	0	0	0	0	0	0	0	0	0	0
Tmem131	0.361344	0.315194	0.290847	0.397526	0.398249	0.442515	0.33513	0.327697	0.357214	0.380246	0.417012	0.296959	0.246958	0.371112	0.3881	0.449922	0.335028	0.286163	0.472009	0.404078	0.406576	0.291843	0.256641	0.339096	0.335751	0.458974	0.308755	0.299438	0.363241	0.381378	0.821895	0.300818	0.247908	0.286389	0.314542	0.352405	0.391269	0.21591	0.330656	0.435784	0.48684	0.441855	0.365568	0.407866	0.477252	0.383974	0.299815	0.348882	0.310599
Vwa3b	0	0	0	0.00175574	0.00104889	0	0	0	0	0.00395332	0	0	0.00278458	0	0	0.00125387	0	0.00371994	0	0	0.00320184	0	0	0	0	0	0	0	0	0.000869728	0	0	0.0019745	0	0.00431118	0	0	0	0	0	0.00240078	0	0	0	0	0.00150186	0.00307381	0	0
Gm37020	0	0	0	0	0	0	0	0	0	0	0	0	0	0	0	0	0	0	0	0	0	0	0	0	0	0	0	0	0	0	0	0	0	0	0	0	0	0	0	0	0	0	0	0	0	0	0	0	0
Cnga3	0	0	0	0	0.000894282	0	0	0	0	0	0	0	0	0	0	0	0	0	0	0	0	0	0	0	0	0	0	0	0	0	0	0	0	0	0	0	0	0	0	0	0	0	0	0	0	0	0	0	0
Inpp4a	0.113046	0.141394	0.045659	0.112615	0.0874104	0.0863041	0.0511807	0.0692605	0.0952699	0.10993	0.099109	0.0624109	0.0593465	0.101078	0.0661169	0.0976788	0.0630439	0.0939975	0.111116	0.104989	0.0758012	0.0598812	0.0608497	0.0417675	0.0619155	0.0793774	0.0575471	0.0512003	0.0724487	0.0601607	0	0.292814	0.0891803	0.14748	0.107019	0.0504161	0.0244986	0.0521701	0.0601739	0.0431045	0.0805162	0.0888329	0.0572315	0.0710452	0.0680237	0.10123	0.0536695	0.0978691	0.0726651
4930439A04Rik	0	0	0	0	0	0	0	0	0	0	0	0	0	0	0	0	0	0	0	0	0	0	0	0	0	0	0	0	0	0	0	0	0	0	0	0	0	0	0	0	0	0	0	0	0	0	0	0	0
Coa5	0.15719	0.162139	0.204043	0.2398	0.240647	0.203405	0.215246	0.268534	0.210661	0.243038	0.20788	0.223146	0.18903	0.235025	0.199884	0.214633	0.218523	0.189048	0.125462	0.194826	0.1922	0.121341	0.211125	0.203767	0.186603	0.176586	0.150995	0.182835	0.162837	0.165731	0	0.622225	0.213101	0.235636	0.255466	0.159888	0.212805	0.182528	0.198721	0.225139	0.202194	0.269031	0.237814	0.272854	0.212562	0.182181	0.190277	0.280227	0.154521
Unc50	0.419254	0.191575	0.216269	0.424875	0.62873	0.43469	0.227959	0.244982	0.49732	0.608709	0.378648	0.195282	0.163786	0.361161	0.554923	0.445183	0.205948	0.276011	0.47006	0.709616	0.406801	0.223932	0.215153	0.467333	0.627214	0.51689	0.20134	0.239069	0.540503	0.640325	0	0.257841	0.155378	0.38139	0.530437	0.289799	0.228155	0.196774	0.50015	0.70338	0.447424	0.181807	0.211611	0.388298	0.596531	0.46512	0.206882	0.23668	0.418891
Mgat4a	0.0563607	0.0278471	0.0188883	0.0141924	0.011882	0.00555758	0.0120882	0.00756363	0.0214392	0.00527391	0.0111112	0.00488783	0.00232227	0	0.0056264	0.00622946	0	0.00944947	0.00380125	0	0.00588452	0.0144513	0.00939747	0.00951743	0.0113198	0.00193517	0.00836894	0.00461445	0.0165348	0.0101201	0	0	0.0161206	0.00759246	0.00851753	0.0232437	0.00561602	0.00285052	0	0.0259937	0.0016692	0	0.00806411	0.00486153	0.0178859	0.00679323	0.00860985	0.0242287	0.00927818
2010300C02Rik	0	0	0.00197561	0.000707963	0.00169844	0.000968176	0	0.00269214	0	0.00236504	0	0	0	0	0.00127972	0.00431057	0	0.00448138	0	0.00843419	0	0	0.00139761	0	0.00264023	0	0.0067604	0	0	0.000821565	0	0	0.0014115	0.0044801	0	0	0.0201728	0.00163765	0	0	0.00118609	0.0063003	0	0	0	0.00171628	0.00205576	0	0.00705082
4930556I23Rik	0	0	0	0	0	0	0	0	0	0	0	0	0	0	0	0	0	0	0	0	0	0	0	0	0	0	0	0	0	0	0	0	0	0	0	0	0	0	0	0	0	0	0	0	0	0	0	0	0
Tsga10	0.075525	0.0399775	0.0491184	0.0755996	0.0416944	0.0123286	0.0178612	0.0154257	0.026487	0.0180556	0.0233184	0.0245396	0.0267991	0.0433188	0.0405397	0.0348688	0.0177026	0.0183139	0.0308491	0.0175637	0.00897676	0.0128851	0.0130545	0.0274994	0.0129716	0.0523117	0.0604503	0.0450677	0.0439833	0.0682993	0	0.220131	0.0396704	0.0506329	0.0824188	0.008925	0.0432227	0.0179699	0.0267936	0.0421792	0.0263115	0.0123386	0.0282285	0.0243239	0.0327338	0.0285313	0.0170415	0.0140893	0.00708298
Gm26805	0	0	0	0	0.00103613	0	0	0	0	0	0	0	0	0	0	0	0	0	0	0	0	0	0.00161568	0.00327318	0	0	0	0	0	0	0	0	0	0	0.000999708	0	0.00415339	0	0	0	0	0	0	0	0	0	0	0	0
Lipt1	0	0.00710842	0.0346046	0.0271525	0.044445	0.0343703	0.0290993	0.056122	0.0198907	0.0644121	0.0303928	0.0434184	0.0444939	0.0466592	0.0532798	0.0369675	0.0352108	0.0330608	0.0251427	0.0414323	0.015406	0.0311886	0.0336939	0.0208332	0.0509687	0.0585593	0.0165571	0.0301409	0.0274511	0.0336116	0	0.153815	0.0206396	0.0345938	0.031151	0	0.0361973	0.0227349	0.0426598	0.0253694	0.0655178	0.0294692	0.0788539	0.0510678	0.0909034	0.0446461	0.0333676	0.0366716	0.0331041
Mitd1	0.0955891	0.0849374	0.143686	0.17293	0.209697	0.169667	0.0912457	0.0964227	0.178364	0.169898	0.108255	0.131497	0.110173	0.17506	0.160826	0.171804	0.131856	0.165378	0.213498	0.256058	0.130389	0.184057	0.172905	0.161209	0.234641	0.13173	0.114796	0.115485	0.148348	0.179023	0	0.0786262	0.0963936	0.133828	0.184153	0.12773	0.117065	0.179443	0.174107	0.188989	0.17149	0.135373	0.142821	0.154299	0.207133	0.174517	0.133577	0.163081	0.220863
Mrpl30	1.4666	1.94628	2.16337	1.64714	1.54964	1.54071	1.85787	1.91959	1.54806	1.70951	1.56501	2.10941	2.36332	1.8134	1.79437	1.54329	1.86872	1.79784	1.48141	1.56368	1.59521	2.14874	2.48702	1.90688	1.86617	1.52883	2.28325	2.22167	1.98083	1.70358	1.64379	1.68598	2.25999	1.5709	1.58755	1.93789	2.41862	2.53113	2.00993	2.22052	1.48132	1.87852	1.72222	1.55135	1.49002	1.51611	1.86845	1.93042	1.48252
Lyg2	0	0	0	0	0	0	0	0	0	0	0	0	0	0	0	0	0	0	0	0	0	0	0	0	0	0	0	0	0	0	0	0	0	0	0	0	0	0	0	0	0	0	0	0	0	0	0	0	0
Gm15457	0	0	0	0	0	0	0	0	0	0	0	0	0	0	0	0	0	0	0	0	0	0	0.00087874	0	0	0	0	0	0	0	0	0	0	0	0	0	0	0	0	0	0	0	0	0	0	0	0.00279792	0	0
Lyg1	0	0	0	0	0	0	0	0	0	0	0	0	0	0	0	0	0	0	0	0	0	0	0	0	0	0	0	0	0	0	0	0	0	0	0	0	0	0	0	0	0.00180786	0	0.00770416	0	0	0	0	0	0
Txndc9	0.916957	0.832295	1.02316	0.9155	0.876863	1.03522	0.93675	0.811729	0.777908	1.01025	0.888497	0.828069	0.971957	0.806819	0.859553	1.05852	0.923784	0.962178	0.955136	1.04743	0.834171	0.849113	0.908389	0.849542	0.849289	1.00518	1.15281	1.08528	1.03344	0.989736	0.821895	1.09966	0.906555	0.898469	0.906713	1.00677	0.97032	0.929778	0.756142	1.00411	1.12565	1.11013	1.16472	0.883924	1.02044	1.00876	0.882149	1.07061	0.865263
Eif5b	2.0468	2.0602	2.09141	1.97609	2.46862	2.36784	2.12563	2.207	1.91829	2.48469	2.27808	1.7163	1.85769	1.80083	2.26806	2.42549	2.15925	2.06272	1.77356	2.26879	2.39163	2.14469	1.99484	1.92139	2.38708	2.43541	1.95031	1.64804	1.84185	2.02778	4.93137	1.43883	2.2717	2.2013	2.79134	2.06523	2.16505	1.87594	1.84165	2.32939	2.46231	2.13518	2.2185	1.89731	2.51026	2.573	2.20796	2.14361	1.73865
Rev1	0.386682	0.376061	0.204868	0.25866	0.254697	0.416073	0.430295	0.421673	0.508683	0.422828	0.320494	0.434227	0.231911	0.28078	0.28762	0.410192	0.419078	0.479701	0.453164	0.472494	0.507021	0.433562	0.328524	0.411282	0.427237	0.500099	0.336032	0.295676	0.340116	0.350603	0	0.20594	0.228406	0.270695	0.216908	0.299027	0.415473	0.241661	0.298702	0.293161	0.462035	0.409464	0.450092	0.352361	0.37069	0.480981	0.398218	0.41868	0.507449
Gm5099	0	0	0	0	0	0	0	0	0	0	0	0	0	0	0	0	0	0	0	0	0	0	0	0	0	0	0	0	0	0	0	0	0.00174279	0	0	0	0	0	0	0	0	0	0	0	0	0	0	0	0
Aff3	0.809405	0.80446	0.52667	0.28943	0.433955	0.739208	1.05821	0.896182	0.603969	0.659664	0.64802	0.835072	1.1401	0.646075	0.810554	0.887577	1.25154	0.94949	0.731673	0.820764	0.647916	0.748061	0.62688	0.494014	0.545347	0.480895	0.761593	0.811693	0.536243	0.563515	1.64379	1.17938	0.905625	0.472633	0.573743	0.674261	0.71512	0.644744	0.487741	0.60614	0.699482	1.02464	0.908787	0.66365	0.584684	0.723426	0.811734	0.693171	0.608743
Gm16150	0.0113479	0.0087976	0.00181191	0	0.00152323	0.00159731	0.00662261	0.00865329	0	0.00141266	0	0.00912025	0.0044002	0.00166774	0.00303569	0.00346307	0.00685314	0.00783092	0.00913805	0	0.00469729	0.00518497	0.0025463	0	0.000829656	0.00680437	0	0.00150892	0.00139108	0	0	0	0.00198179	0.00390055	0	0	0.00446547	0.00348246	0.00226679	0.00466192	0.0014078	0.00479133	0.00750361	0	0	0	0.00887622	0.0052555	0
Gm16151	0	0	0.000570354	0	0	0	0.00103612	0	0	0.00234512	0	0	0	0	0.00526846	0	0.00163653	0	0	0	0	0	0	0	0	0	0	0	0.00154917	0.000896675	0	0	0	0	0	0	0	0.00129665	0	0	0	0	0	0	0	0	0	0	0
Gm16152	0.195742	0.472314	0.268702	0.0992126	0.0788873	0.175	0.593947	0.447411	0.337189	0.203464	0.153563	0.498807	0.650462	0.308653	0.241727	0.203405	0.502187	0.48658	0.293008	0.223472	0.149352	0.398205	0.418798	0.196542	0.122303	0.0825187	0.189936	0.392067	0.160436	0.0999788	0.821895	1.55256	0.462223	0.237015	0.142208	0.0975702	0.363028	0.417404	0.186851	0.148423	0.169513	0.292613	0.52374	0.254726	0.166837	0.138691	0.500143	0.318531	0.198305
Lonrf2	0.021298	0	0	0	0.00450399	0.00371078	0.00311568	0	0	0.00109372	0.00736572	0.0015733	0.00263417	0	0	0.00627631	0.00965848	0.0223881	0	0	0.0150602	0.00933825	0.00194571	0.00557454	0.00880387	0	0	0	0	0.00100253	0	0	0.00218986	0	0.00485479	0	0.00429985	0	0	0.00451229	0.00345161	0.0112071	0.0148818	0.00580937	0.0137831	0.0232546	0.0136027	0.0040191	0.016817
Chst10	0.0130625	0	0.00248018	0.0106428	0.0103645	0.0356115	0.00841707	0.0121119	0.0247496	0.0418742	0.0506974	0.0130555	0.00695731	0	0.00842056	0.044665	0.0131356	0.0230722	0.0366212	0.0646333	0.0285498	0.0105314	0.00253189	0.00983113	0.0270885	0.0650675	0.00775348	0.0009807	0.0106498	0.0135742	0	0	0.00200908	0.00457588	0.0105716	0.0169604	0.00678183	0.00686351	0.00729937	0.0126608	0.0314764	0.022073	0	0.0311005	0.0304266	0.0399869	0.0329742	0.0142963	0.00950532
Gm37707	0	0	0	0	0	0	0	0	0	0	0	0	0	0	0	0	0	0	0	0	0	0	0	0	0	0	0	0	0	0	0	0	0	0	0	0	0	0	0	0	0	0	0	0	0	0	0	0	0
Nms	0	0	0	0	0	0	0	0	0	0	0	0	0	0	0	0	0	0	0	0	0	0	0	0	0	0	0	0	0	0	0	0	0	0	0	0	0	0	0	0	0	0	0	0	0	0	0	0	0
Pdcl3	0.960956	0.599826	0.471737	0.893714	1.00444	0.783731	0.487938	0.402585	0.645	0.772501	0.663087	0.406743	0.362708	0.723522	0.784619	0.832878	0.518576	0.552787	0.920147	0.979237	0.708869	0.326229	0.326131	0.699917	0.751698	0.93518	0.372749	0.380764	0.708075	0.800811	0	0.200706	0.443208	0.732959	0.893468	0.552865	0.392873	0.381576	0.756459	0.83512	0.812379	0.520797	0.528028	0.750944	0.977424	0.680361	0.367737	0.45568	0.803637
Gm37821	0	0	0	0	0	0	0	0	0	0	0	0	0	0	0	0	0	0	0	0	0	0	0	0	0	0	0	0	0	0	0	0	0	0	0	0	0	0	0	0	0	0	0	0	0	0	0	0	0
Npas2	0.0218733	0.0142033	0.00300173	0.00159677	0.00403187	0.0229749	0.0047776	0	0.00575416	0	0.00752308	0	0.000962783	0	0.00411134	0.0177918	0.00370291	0	0.0108741	0.0126005	0.0122017	0.00307711	0.00116403	0	0.00200412	0	0.00175997	0	0.00212395	0.00154976	0	0	0.00162387	0	0	0	0	0	0.00678316	0	0.0115	0.0020357	0	0	0.00332879	0.00380941	0	0	0.00428922
Rpl31	7.15818	9.32692	10.4023	7.49535	8.06253	8.52975	10.8627	9.5188	8.36915	9.31029	9.19507	12.5001	12.1614	9.82232	10.4094	7.931	9.84651	7.99451	7.01473	7.87304	8.74908	12.6105	11.3889	9.97397	10.3765	7.50751	10.5265	10.4314	8.26697	9.26828	3.28758	9.84414	10.7944	8.28692	8.57784	9.19902	11.6863	12.1874	10.1986	10.697	8.38266	10.1145	7.99215	7.55735	8.37315	8.48644	10.585	8.8487	8.62513
Tbc1d8	0.138218	0.120791	0.0858572	0.0994567	0.109155	0.237998	0.0957784	0.088872	0.0856749	0.152503	0.168598	0.0531502	0.0529465	0.0662821	0.108927	0.238461	0.131642	0.116724	0.107414	0.203229	0.240808	0.0744666	0.105028	0.0999062	0.135042	0.278087	0.0759324	0.0468518	0.119583	0.111322	0.821895	0.104498	0.0221036	0.0640247	0.0835076	0.254553	0.076115	0.0710873	0.154508	0.159111	0.263844	0.155323	0.117246	0.234391	0.230131	0.275526	0.102742	0.0852128	0.146064
Cnot11	0.238176	0.1934	0.188012	0.243464	0.230906	0.25454	0.180912	0.157517	0.183726	0.201541	0.253995	0.156933	0.181871	0.192453	0.231421	0.285604	0.217343	0.185753	0.247669	0.210096	0.253332	0.213407	0.197532	0.236423	0.224247	0.306235	0.27154	0.215299	0.267645	0.288115	0	0.211472	0.191903	0.135815	0.23221	0.196736	0.194393	0.196655	0.246748	0.21895	0.269706	0.242225	0.304885	0.171319	0.254348	0.260756	0.193366	0.18597	0.207445
Rnf149	0.773062	0.881715	0.674868	0.61846	0.740421	0.920388	0.820111	0.863035	0.851249	0.813994	0.795805	0.881989	0.84382	0.713603	0.907869	0.878334	0.91163	0.995718	0.76443	1.12017	0.791995	0.691338	0.757439	0.723417	0.860856	0.701987	0.673425	0.695313	0.679799	0.72927	1.64379	0.386489	0.734338	0.655323	0.868092	0.826313	0.539552	0.676365	0.610751	0.863144	0.862487	0.909916	0.809499	1.04754	0.889932	0.898516	0.805957	0.978463	0.839889
Creg2	0.0704235	0.170474	0.126715	0.0868772	0.0825338	0.0452783	0.0641684	0.0778698	0.0825917	0.0550892	0.0335083	0.0595535	0.103467	0.0774782	0.0820304	0.0522296	0.0651366	0.0607967	0.0253558	0.0429858	0.0450086	0.0176015	0.0174008	0.021622	0.0202535	0.0152468	0.0116416	0.0336762	0.0190904	0.0134953	0	0.164264	0.215315	0.151154	0.110128	0.0423998	0.0129624	0.0384982	0.00505129	0.00349079	0.0250596	0.0486683	0.0217193	0.0527066	0.0272586	0.030832	0.059775	0.0307054	0.0600615
D930019O06Rik	0	0	0	0.00617743	0	0	0	0	0.00391351	0	0	0	0	0.00169001	0	0.00152268	0	0	0	0.00443657	0	0	0	0	0	0	0	0.000693351	0	0	0	0	0.00153741	0	0	0	0	0	0	0	0	0.00329079	0	0	0	0	0	0.00361654	0
Rfx8	0	0	0.00206052	0.00195582	0.00383532	0	0	0	0	0	0	0.00203618	0.00117481	0.00627509	0.00290509	0	0.00161824	0	0	0	0	0	0.00140112	0	0	0	0	0.000794225	0	0.00128193	0	0	0.00864115	0	0.00444122	0	0	0.00207686	0	0.00155624	0	0	0	0	0	0	0	0.00389172	0
Gm3646	0	0	0	0.00120364	0	0	0	0	0	0	0	0	0	0	0	0	0	0	0	0	0	0	0	0	0	0	0	0.000571682	0	0	0	0	0	0	0	0	0	0.00139204	0	0	0	0	0	0	0	0	0	0	0
1700066B17Rik	0	0.0435034	0.0200357	0.0219275	0.0259822	0.00750066	0.0145796	0.0161095	0.0404559	0.0118779	0	0.0311518	0.0389615	0.0316052	0.0269971	0.00832208	0.00821478	0.0135739	0.0226713	0.00715517	0.0056697	0.0058745	0.0185121	0.0162283	0.0152297	0.0219095	0.0143024	0.0377892	0.0222032	0.0276596	0	0	0.0247536	0.0188344	0.0147488	0.0096745	0.0171889	0.0255546	0.0134849	0.0388934	0.00799316	0.00942979	0.00622719	0.0169783	0.010204	0.00790804	0	0.0102317	0
Map4k4	2.82948	4.64318	5.83988	4.66773	4.27468	2.89239	3.56376	3.5291	2.41068	2.53205	2.31313	3.32014	4.45455	3.49385	3.6515	3.26005	4.20858	4.4045	2.57748	2.3999	1.97682	2.24131	2.44201	1.80724	1.71819	2.32012	2.49879	4.07786	2.53841	2.42812	6.57516	6.5147	6.3441	4.87776	5.32154	1.63459	2.60417	3.37148	2.45816	2.22727	3.20834	4.11292	3.89915	2.4862	2.40159	2.58941	2.85867	2.93578	2.03003
Il1r2	0	0	0.000874461	0	0	0.000757663	0	0	0	0	0	0	0.0028373	0	0	0	0	0.00358475	0	0	0	0	0.000469114	0	0	0	0	0	0	0.00247405	0	0	0	0	0	0	0	0	0	0	0	0	0	0	0	0	0.00225054	0	0
Gm16894	0	0	0	0.00255001	0	0	0	0	0	0	0	0	0	0	0	0	0	0	0	0	0	0.00160337	0	0	0	0	0	0	0	0	0	0	0	0	0	0	0	0	0.00161419	0.00182974	0	0	0	0	0	0	0	0	0
Il1r1	0.039619	0.0485673	0.0968011	0.163086	0.120352	0.0180591	0.0101876	0.0192869	0.0288828	0.0233955	0.0601717	0.0267954	0.0542826	0.0757646	0.0731816	0.0193432	0.023603	0.0271616	0.0322993	0.0254219	0.0144218	0.0273001	0.0358117	0.0552888	0.0531316	0.028729	0.0483461	0.0952418	0.0813243	0.0619191	0	0.0535424	0.0390058	0.0324671	0.04688	0.00785804	0.0157027	0.0733928	0.110708	0.0862777	0.0160792	0.0138283	0.0147946	0.00880565	0.00641365	0.0193524	0.0120158	0.0377576	0.0246553
Il1rl2	0	0	0.0182746	0.0362851	0.012603	0.0018775	0	0.00287364	0	0.00954086	0	0.00142698	0.00579017	0.00463425	0	0	0	0.00480342	0.0069847	0	0.00154825	0	0.00271116	0.000916845	0.00242837	0.0051205	0.00271191	0.00635601	0.00488573	0.00662304	0	0	0.0126363	0.0168335	0.0106467	0	0	0.00474923	0.00483559	0.00698753	0.00363679	0.00152434	0.0076839	0.0122168	0.00611938	0.00111571	0	0.00946117	0.0103692
Il1rl1	0	0	0	0	0	0	0	0	0	0	0	0	0	0	0	0	0	0	0	0	0	0	0	0	0	0	0	0	0	0	0	0	0	0	0	0	0	0	0	0	0	0	0	0	0	0	0	0	0
Il18r1	0	0	0	0	0	0	0.00643213	0.00393801	0	0.00602561	0	0.0123322	0.008741	0.00310672	0.00565822	0	0	0	0	0	0.00231867	0.00458603	0.0106347	0	0.00876744	0	0.00177039	0.00189877	0	0.000879638	0	0	0	0.00315001	0	0	0.00988779	0.0122442	0	0.00938758	0	0	0	0	0	0.000922651	0	0.00624389	0.00627861
Il18rap	0	0	0	0	0	0	0	0	0	0	0	0	0	0	0	0	0	0	0	0	0	0	0	0	0.00146821	0	0	0	0.00284803	0	0	0	0	0	0	0	0	0	0	0	0	0	0	0	0	0	0	0	0
Gm35801	0	0	0	0	0	0	0	0	0	0	0	0	0	0	0	0	0	0	0	0	0	0	0	0	0	0	0	0	0	0	0	0	0	0	0	0	0	0	0	0	0	0	0	0	0	0	0	0	0
Slc9a4	0	0	0	0	0	0	0	0	0	0	0	0	0	0	0	0	0	0	0	0	0	0	0	0	0	0	0	0	0	0	0	0	0	0	0	0	0	0	0	0	0	0	0	0	0	0	0	0	0
Slc9a2	0.0644363	0.0115106	0.0117147	0.010669	0.015044	0.00659901	0.0018393	0.0102695	0	0.00874662	0.00415758	0.00500954	0.0117978	0.0258148	0.0269091	0.0106387	0.00394493	0.00987048	0.0173921	0	0.0119712	0.0028674	0.00319934	0.0185711	0.00669445	0	0.00197364	0.0091378	0.0219823	0.0206382	0	0	0.00961716	0.00508346	0.0155371	0	0	0.0122674	0.0130371	0.00521818	0.00730764	0.00921321	0	0	0.0029247	0.00153413	0.00201561	0	0
Gm37623	0	0	0	0	0	0	0	0	0	0	0	0	0	0	0	0	0	0	0	0	0	0	0	0	0	0	0	0	0	0	0	0	0	0	0	0	0	0	0.00199483	0	0	0	0	0	0	0	0	0	0
Gm37915	0	0	0	0.000589055	0.00127173	0	0	0	0	0	0	0	0	0	0	0	0	0	0	0	0	0	0	0	0	0	0	0	0	0	0	0	0	0.00192783	0	0	0	0	0	0	0	0	0	0	0	0	0	0	0
Mfsd9	0	0.0212736	0.017429	0.017268	0.0274949	0.014404	0.00531923	0.00920964	0	0.0187916	0.00834196	0.00624515	0.0393868	0.0230432	0.0293601	0.0118889	0.0106785	0.0102148	0.0114793	0.0127021	0.00771863	0.0129574	0.0203599	0.0130403	0.0217809	0.00694554	0.0160381	0.0200848	0.014427	0.0107647	0	0	0.0299989	0.00673854	0.0327132	0.0262563	0.00977009	0.0432828	0.0265871	0.0341635	0.00276857	0.00689979	0.00622719	0	0.0280571	0.00500112	0.00859851	0.021069	0.0132535
Tmem182	0	0	0.0238442	0.00534125	0.0069184	0	0	0.00127591	0	0.00527442	0	0	0.0226113	0.0290672	0.0176609	0	0	0	0	0	0	0	0.00923134	0.0219839	0.00683573	0	0.0017088	0.0340488	0.0210182	0.0156929	0	0	0.013581	0.00188381	0.00655899	0	0	0.0569828	0.012175	0.0333701	0	0	0	0	0	0.00145564	0.00332534	0	0
4930448I06Rik	0	0	0	0	0	0	0	0	0	0	0	0	0	0	0	0	0	0	0	0	0	0	0	0	0	0	0	0	0	0	0	0	0	0	0	0	0	0	0	0	0	0	0	0	0	0	0	0	0
Gm28634	0	0	0	0	0	0	0	0	0	0	0	0	0	0	0	0	0	0	0	0	0	0	0	0	0	0	0	0	0	0	0	0	0	0	0	0	0	0	0	0	0	0	0	0	0	0	0	0	0
Gm29260	0	0	0	0	0	0	0	0	0	0	0	0	0	0	0.00470987	0	0	0	0	0	0	0	0	0	0	0	0	0	0.00227596	0.0029048	0	0	0	0	0	0	0	0	0	0	0	0	0	0	0	0	0	0	0
Gm9915	0	0	0	0	0	0	0	0	0	0	0	0	0	0	0	0	0	0	0	0	0	0	0	0	0	0	0	0	0	0	0	0	0	0	0	0	0	0	0	0	0	0	0	0	0	0	0	0	0
Gm29664	0	0	0	0	0	0	0	0	0	0	0	0	0	0	0	0	0	0	0	0	0	0	0	0	0	0	0	0	0	0	0	0	0	0	0	0	0	0	0	0	0	0	0	0	0	0	0	0	0
Gm28175	0	0	0.00076523	0	0	0	0	0	0	0	0	0	0.0012494	0	0	0	0	0	0	0	0	0.00392082	0.00291833	0.00540409	0.00234942	0	0.00539573	0.00143749	0	0.00597238	0	0	0	0	0	0.0085924	0.00750627	0	0	0.00451635	0	0	0	0	0	0	0	0	0
Gm28140	0	0	0	0	0	0	0	0	0	0	0	0	0	0	0	0	0	0	0	0	0	0	0	0	0	0	0	0	0	0	0	0	0	0	0	0	0	0	0	0	0	0	0	0	0	0	0	0	0
Pantr1	0	0	0	0	0	0	0	0	0	0	0	0	0	0	0	0	0	0	0	0	0	0	0	0	0	0	0	0.000664426	0	0	0	0	0	0	0	0	0	0	0	0	0	0	0	0	0	0	0	0	0
Pou3f3	0	0	0	0	0.00214063	0	0	0.00144732	0	0	0	0	0	0	0	0	0	0	0	0	0	0	0	0	0	0	0	0	0	0	0	0	0	0	0	0	0	0	0	0	0	0	0	0	0	0	0	0	0
Dalir	0	0	0	0	0	0	0	0	0	0	0	0	0	0	0	0	0	0	0	0	0	0	0	0	0	0	0	0	0	0	0	0	0	0	0	0	0	0	0	0	0	0	0	0	0	0	0	0	0
Mrps9	0.666128	0.428616	0.614938	0.526613	0.47863	0.673966	0.710438	0.65751	0.698479	0.592544	0.612633	0.696088	0.657485	0.614434	0.675043	0.615795	0.637463	0.677284	0.537966	0.649334	0.691367	0.767196	0.749496	0.696158	0.673261	0.712321	0.90411	0.848965	0.733352	0.655819	0	0.493231	0.628718	0.514679	0.560471	0.683731	0.914112	0.816428	0.603396	0.688451	0.694566	0.560227	0.525628	0.770793	0.559494	0.672184	0.67266	0.829112	0.805177
Gpr45	0.00892484	0	0.0027591	0.0171173	0.0134411	0.00250818	0	0	0.0138733	0.00347579	0.00267149	0	0	0.00399633	0.00477498	0	0.00898608	0	0	0	0	0	0.00148598	0	0.00158224	0.00560663	0.00122313	0.00213939	0.00122581	0	0	0	0.00992938	0.017792	0.00666099	0	0	0	0	0.0041582	0	0.0027811	0	0	0	0.00244597	0	0.00361654	0
Tgfbrap1	0.243705	0.155201	0.115916	0.109901	0.128171	0.0978306	0.0900893	0.108766	0.142221	0.111456	0.0836863	0.112493	0.107765	0.129084	0.142561	0.103342	0.113048	0.151535	0.1402	0.120196	0.101525	0.116313	0.0882652	0.123814	0.153076	0.105748	0.0838505	0.0833407	0.0834765	0.149945	0	0	0.113099	0.11974	0.160402	0.0427158	0.0998082	0.0905271	0.0682599	0.103135	0.0725741	0.122358	0.185439	0.146565	0.139122	0.0843001	0.106553	0.103363	0.0799436
Gm28782	0	0	0	0	0	0	0	0	0	0	0	0	0	0	0	0	0	0	0	0	0	0	0	0	0	0	0	0	0	0	0	0	0	0	0	0	0	0	0	0	0	0	0	0	0	0	0	0	0
8430432A02Rik	0	0	0	0.0043671	0.00608476	0.00173263	0.0041983	0.00481931	0	0	0.00377505	0	0.0015593	0.00411567	0.00232733	0.00118716	0.00451227	0	0	0	0.0019718	0	0.00212907	0.00807594	0.00175625	0.0020417	0.001805	0.000819081	0.00510671	0.000625961	0	0	0.00153371	0.00392034	0.00108955	0	0	0.00301199	0.00204476	0	0	0	0	0	0.00294648	0.00199434	0	0.00720151	0
AI597479	0.0905951	0.139552	0.0961546	0.0894704	0.12294	0.100389	0.0964081	0.129935	0.141238	0.162581	0.0988249	0.0796058	0.10138	0.112169	0.136716	0.108085	0.0745879	0.0990248	0.0884922	0.113523	0.11136	0.11028	0.162825	0.143189	0.145386	0.146185	0.132845	0.11278	0.14405	0.126881	0	0	0.088239	0.0908083	0.097582	0.164178	0.0981121	0.112325	0.132321	0.126866	0.120657	0.111161	0.107568	0.104187	0.165103	0.135086	0.124202	0.138078	0.160473
Fhl2	0.0443058	0.0674212	0.129089	0.148747	0.184543	0.0227034	0.0896245	0.138414	0.05086	0.0790716	0.0340478	0.0544888	0.127773	0.108667	0.179238	0.0394484	0.0629684	0.0905401	0.0275603	0.0532318	0.0414538	0.0308272	0.0623717	0.0389106	0.0688259	0.0267675	0.0531233	0.116	0.0709546	0.111095	0	0.19385	0.180429	0.128582	0.178347	0.0152827	0.019057	0.133286	0.137281	0.103832	0.0331862	0.0561467	0.107386	0.0295776	0.0491118	0.0283545	0.0624416	0.0929512	0.0146751
Gm29040	0	0	0	0	0.000521286	0	0	0	0	0	0	0	0	0	0	0	0	0	0	0	0	0	0.00150339	0	0	0	0	0	0	0	0	0	0	0	0	0	0	0	0	0	0	0	0	0	0	0	0	0	0
Nck2	0.138951	0.116442	0.0832209	0.14096	0.148451	0.179752	0.0957401	0.103222	0.150197	0.143676	0.211023	0.120622	0.078724	0.0828757	0.108098	0.223526	0.130124	0.13024	0.168808	0.190195	0.207325	0.0643887	0.0541465	0.0773666	0.0986116	0.222003	0.0851445	0.0788313	0.117537	0.121937	0.821895	0.15793	0.125973	0.134274	0.185935	0.140215	0.0486276	0.0600808	0.0896999	0.108521	0.250161	0.126358	0.120051	0.164484	0.203403	0.202186	0.0938776	0.075965	0.104908
1500015O10Rik	0.393452	0.0346145	0.00470411	0.00120669	0.00825494	0.00667771	0.00613889	0.00459553	0	0	0.00341074	0.0044321	0.00381478	0.000987051	0.00125236	0.00511098	0.00150942	0	0	0	0.00488043	0.00878088	0.00646418	0.00169303	0.0109635	0.00554142	0.00488847	0.00214434	0.00245404	0.00716341	0	0	0.00622967	0	0.00236489	0.0102051	0	0.00461394	0.00457339	0.00212587	0.0024418	0	0	0	0	0.00306695	0.00221997	0.00373899	0
Gm29155	0.0125469	0	0	0.00310676	0.000953959	0	0	0	0.00739187	0.0030706	0	0	0	0	0	0	0	0	0	0	0	0	0	0.00156748	0.0017293	0.00417129	0	0.00224734	0	0.000686761	0	0	0	0	0	0	0	0.00238741	0	0.00156673	0	0	0	0	0	0.00240383	0	0	0.00578997
Gm29157	0	0	0	0	0	0	0	0	0	0	0	0	0	0	0	0	0	0	0	0	0	0	0	0	0.00128717	0	0	0	0	0	0	0	0	0	0	0	0	0	0	0	0	0	0	0	0	0	0	0	0
Gm29156	0	0	0	0	0.00179213	0	0	0	0.00296835	0	0	0.00205996	0	0	0.00858094	0	0	0	0	0	0.00182736	0	0.00130747	0.00180007	0.0012293	0	0	0.00194842	0	0	0	0	0	0	0	0	0	0	0.0025505	0	0.00187489	0	0	0.00555506	0	0.0017754	0.00455299	0	0.00605375
Uxs1	0.340972	0.343583	0.246925	0.263783	0.275888	0.475676	0.366145	0.295854	0.316414	0.295023	0.381491	0.275874	0.275308	0.271995	0.266794	0.421213	0.376116	0.304008	0.31397	0.357079	0.462814	0.426646	0.413482	0.421202	0.374811	0.534762	0.42111	0.350643	0.378439	0.344312	0	0	0.25307	0.274884	0.263043	0.53065	0.26739	0.309061	0.350045	0.31523	0.364619	0.330295	0.280896	0.435283	0.402688	0.454339	0.468762	0.401107	0.425391
Tpp2	0.994974	1.00354	0.832728	0.886536	0.798468	1.13771	0.997062	1.0031	1.0579	0.900403	1.00192	0.880572	0.921537	0.909551	0.916592	1.06348	0.939189	0.892005	1.06124	0.891249	1.01864	0.892547	0.858243	0.812059	0.930932	1.0684	0.729692	0.824855	0.907978	0.821271	0	0.183879	0.849024	0.938879	0.896307	0.923092	0.759331	0.78694	0.721424	0.805601	1.1092	0.944065	1.06975	1.23779	0.997573	1.08842	1.02127	0.964778	1.07296
Mettl21c	0.0166462	0.0190753	0.0179693	0.0115487	0.0184825	0.0441065	0.0363464	0.0372059	0.0241549	0.0211405	0.0237453	0.0467717	0.0294249	0.0251472	0.0288504	0.0246741	0.0487494	0.00846466	0.0191906	0.0281192	0.0251578	0.0444506	0.0377393	0.0329748	0.0283043	0.0223304	0.056519	0.0168088	0.0288091	0.0249986	0	0	0.0334512	0.0183085	0.0273134	0.0363337	0.055642	0.0587698	0.0248166	0.0387949	0.030091	0.0527032	0.0290403	0.0327344	0.025329	0.0272641	0.0335957	0.0204072	0.0382509
Gm8251	0.021298	0.0420776	0.0316895	0.032507	0.0279823	0.0235726	0.0216131	0.0154794	0.0520834	0.00569292	0.0466202	0.0338598	0.038044	0.0239584	0.0235632	0.0286882	0.0206106	0.0225419	0.0142582	0.00531263	0.0402474	0.0963935	0.0533401	0.106902	0.0106282	0.0452869	0.139291	0.0397529	0.0295617	0.0352918	0	0	0.0337307	0.107176	0.0778875	0.0225062	0.208477	0.0447425	0.0268332	0.00746564	0.00943839	0	0	0.0115983	0.0150626	0.0296657	0.0117591	0.045557	0.0297907
Tex30	0.309385	0.302734	0.542695	0.609141	0.503415	0.580269	0.28731	0.241404	0.35939	0.483967	0.607036	0.364781	0.442596	0.57791	0.614881	0.582325	0.326872	0.282712	0.429533	0.427563	0.867152	0.498615	0.483524	0.696392	0.687113	0.976761	0.612995	0.575793	0.854328	0.810936	0	0.403795	1.01264	1.43712	1.32255	0.431582	0.284884	0.322996	0.412451	0.380454	0.503472	0.30245	0.281814	0.405195	0.410155	0.645085	0.384404	0.364657	0.495928
Kdelc1	0.314393	0.238794	0.16782	0.265904	0.326276	0.391853	0.23639	0.18076	0.453164	0.464627	0.519581	0.246813	0.215297	0.368484	0.511366	0.342815	0.204368	0.225671	0.39616	0.375623	0.357445	0.284512	0.208894	0.444439	0.444375	0.284257	0.227532	0.154194	0.324405	0.341087	0	0.249033	0.233806	0.345668	0.44012	0.410839	0.253657	0.203799	0.329606	0.504289	0.316811	0.215945	0.277672	0.305335	0.340185	0.394267	0.223272	0.201495	0.458889
Bivm	0.0497914	0.0754788	0.053987	0.0787311	0.10797	0.110808	0.0729439	0.0608371	0.0560453	0.144063	0.0963399	0.0529416	0.0460306	0.092492	0.107597	0.0896144	0.0609564	0.0609765	0.072279	0.113452	0.0952501	0.0511598	0.0467135	0.0961243	0.102528	0.108988	0.0416118	0.0544675	0.115606	0.07819	0	0	0.0659684	0.0986804	0.132607	0.0698523	0.0403914	0.0725762	0.0813436	0.108092	0.0910522	0.0712586	0.072578	0.116311	0.106847	0.104626	0.0759699	0.0638354	0.0832655
Ercc5	0.246117	0.233476	0.187489	0.259519	0.219485	0.294273	0.277843	0.197268	0.279237	0.253758	0.293875	0.212577	0.191244	0.234771	0.206196	0.299527	0.284671	0.276409	0.256253	0.384885	0.290767	0.216067	0.224033	0.254757	0.250991	0.303191	0.263785	0.238191	0.287914	0.328966	0	0.066306	0.183905	0.246706	0.255524	0.253866	0.203558	0.200796	0.19253	0.248513	0.321645	0.35562	0.29743	0.285233	0.348228	0.315045	0.249389	0.217887	0.19848
Mettl21e	0	0	0	0	0	0	0	0	0	0	0	0	0	0	0	0.00107176	0	0	0	0	0	0	0	0	0	0	0	0	0	0	0	0	0	0	0	0	0	0	0	0	0	0	0	0	0	0	0	0	0
Gulp1	0.0383858	0.0189676	0.0612361	0.0654884	0.0558926	0.0121384	0.00946401	0.00517841	0.0179552	0.0242145	0.0148225	0.00601701	0.0369227	0.0616923	0.0555975	0.00804895	0.00236556	0	0.0317277	0.00340982	0.00685091	0.00791752	0.0228283	0.0182769	0.0188711	0.0248887	0.0141618	0.0305063	0.029064	0.0147946	0	0	0.065041	0.0393922	0.0918428	0.00679775	0.0213015	0.0159874	0.0130199	0.011012	0.0143043	0	0.0157602	0.0221856	0.0138519	0.0135378	0.00236467	0.00435235	0.0389528
4930521E06Rik	0	0	0	0	0	0	0	0	0	0	0	0	0	0	0	0	0	0	0	0	0	0	0	0	0	0	0	0	0	0	0	0	0	0	0	0	0	0	0	0	0	0	0	0	0	0	0	0	0
Col3a1	1.09293	0.193442	0.0927178	0.0477821	0.0794166	0.262923	0.084544	0.106973	0.034696	0.0772298	0.412322	0.0702944	0.0547159	0.0222599	0.0762898	0.283679	0.0891342	0.0989753	0.0309776	0.164297	0.152458	0.0609572	0.0623687	0.0258944	0.0621812	0.13903	0.105518	0.0615245	0.0259514	0.095766	0	0.26338	0.0778702	0.0280608	0.0903193	0.123096	0.138804	0.0519011	0.0196054	0.0793266	0.211622	0.0670154	0.0735701	0.0662836	0.0717081	0.181079	0.0349286	0.0740606	0.0278698
Col5a2	0.2682	0.0993559	0.207929	0.199028	0.153756	0.129248	0.0568273	0.0351485	0.00882142	0.0212243	0.159961	0.0298402	0.0446074	0.0430366	0.0849281	0.144295	0.0781906	0.129909	0.0636746	0.0628963	0.0512684	0.00589798	0.00640339	0.0154474	0.014364	0.099835	0.0209328	0.0514878	0.0391367	0.0369829	0	0.123963	0.342258	0.323178	0.300463	0.0692367	0.0095747	0.0285939	0.0112403	0.0266106	0.111676	0.0757176	0.161022	0.0598419	0.0316111	0.0729714	0.0304317	0.0261918	0.00870276
Wdr75	0.277903	0.339304	0.341256	0.370551	0.410514	0.483927	0.527971	0.477315	0.525657	0.485962	0.393978	0.471456	0.435987	0.46292	0.445488	0.473782	0.409457	0.34652	0.470396	0.446346	0.52761	0.501341	0.473469	0.529644	0.51666	0.526856	0.626809	0.442073	0.530265	0.529062	0	0.310089	0.310921	0.286941	0.346049	0.579724	0.455628	0.3835	0.553209	0.455701	0.514772	0.565627	0.345269	0.603048	0.556868	0.551124	0.575976	0.528794	0.456601
Gm5269	0.0159548	0	0.000852644	0.00497052	0	0	0	0	0	0	0	0	0	0	0	0.00219364	0	0.00451018	0	0	0	0	0	0.00107741	0	0	0	0.0107198	0	0.000915208	0	0	0.00083134	0	0	0	0	0.00589358	0	0	0	0.00436312	0	0	0	0	0	0	0
Slc40a1	0.443616	0.862285	1.28574	1.00443	0.952156	0.639227	1.18769	0.990273	0.847351	0.757426	0.39678	0.637861	0.786031	0.743302	0.537025	0.838816	1.7271	1.19047	1.0368	1.10702	0.499745	0.536912	0.47727	0.339753	0.295474	0.663253	0.577803	0.84536	0.519378	0.350117	0	1.46386	1.13697	0.909093	0.897653	0.250434	0.395215	0.547633	0.454466	0.247064	1.14516	1.73798	1.85648	1.32647	1.36885	0.751622	1.08182	0.928125	0.532093
Dnah7b	0.040114	0.104626	0.0877814	0.129859	0.109889	0.0711345	0.0689187	0.091324	0.104467	0.0558354	0.0820056	0.0575339	0.101681	0.0978485	0.106903	0.0778148	0.0750538	0.107269	0.155344	0.151915	0.0509308	0.0394327	0.040601	0.0766452	0.0390092	0.0723412	0.0626452	0.0651435	0.0595457	0.0685293	0.821895	0.513189	0.145687	0.140124	0.145667	0.0470286	0.0138013	0.0449443	0.0467525	0.0572549	0.0731444	0.0501206	0.0747387	0.161112	0.106971	0.0458927	0.0389673	0.0430651	0.0647135
Dnah7c	0	0	0.00235024	0.00685656	0.0072606	0	0.00129118	0.00305856	0.00412467	0	0	0	0.0227369	0.00574722	0.00458535	0	0.00294119	0.00465812	0	0.00409496	0.00184591	0.0206892	0.0194788	0.00556051	0.00860144	0	0.0158718	0.0360323	0.00777011	0.0145505	0	0	0.0123426	0.00951108	0.0225406	0.0112538	0.0307663	0.0345506	0.015922	0.0285686	0	0	0.00723334	0	0	0	0	0.00355884	0.00730954
Slc39a10	0.441447	0.373724	0.298057	0.352514	0.343278	0.356237	0.367087	0.276585	0.288665	0.325804	0.30222	0.334234	0.24433	0.243704	0.240411	0.333801	0.318338	0.318023	0.374667	0.271347	0.390062	0.451609	0.310662	0.364565	0.329428	0.422092	0.406481	0.291358	0.296229	0.281427	1.64379	0.529016	0.218534	0.321921	0.327821	0.448002	0.370971	0.217673	0.249704	0.254685	0.519769	0.302612	0.290995	0.307686	0.295837	0.441187	0.42516	0.410376	0.342868
Gm28151	0	0	0.00563433	0.00450198	0.0119763	0.00532062	0.0021491	0.0011136	0	0.00519801	0.0183058	0.00159184	0.0038147	0.00478975	0.00186121	0	0.00644225	0	0.00478436	0.00646185	0.00608274	0.00113091	0.0012938	0.00288562	0.00320805	0	0.00269174	0.00171698	0.00239034	0.00385616	0	0.0576568	0.0127062	0.00315001	0.00968149	0	0	0.0046305	0.0122278	0.00515265	0.0173065	0	0	0.00471288	0.00250239	0.00623245	0.00196767	0.00508235	0
Gm28826	0	0	0.000850976	0	0	0	0	0	0	0.0020401	0	0	0	0	0	0	0	0	0	0	0	0	0	0	0	0	0	0	0	0	0	0	0	0	0	0	0	0	0	0	0	0	0	0	0	0	0	0.00480928	0
C230029F24Rik	0	0	0	0	0	0	0	0	0	0	0	0	0	0	0	0	0	0	0	0	0	0	0	0	0	0	0	0	0	0	0	0	0	0	0	0	0	0	0	0	0	0	0	0	0	0	0	0	0
4933411E06Rik	0	0	0	0	0	0.000850664	0	0	0	0	0	0	0	0	0	0	0.00238879	0	0	0	0	0	0	0	0	0	0	0.00123732	0	0	0	0	0.00265799	0	0	0	0	0.00129249	0	0	0.00254782	0	0	0	0	0	0	0	0
Gm29665	0	0	0	0	0	0	0	0	0	0	0	0	0	0	0	0	0	0	0	0	0	0	0	0	0	0	0	0	0	0	0	0	0	0	0	0	0	0	0	0	0	0	0	0	0	0	0	0	0
Gm28321	0	0	0	0	0	0	0	0	0	0	0	0	0	0	0	0	0	0	0	0	0	0	0	0	0	0	0	0.00116212	0	0	0	0	0	0	0	0	0	0	0	0	0	0	0	0	0	0	0	0	0
Tmeff2	0.0156772	0.00780566	0.0378931	0.0558392	0.07283	0.0124711	0.00519829	0.00127591	0	0.00322294	0.0186466	0.00571549	0.0139827	0.0139752	0.0194003	0.0119231	0.0060448	0.00930585	0.00705872	0.00356506	0.0105375	0.0127831	0.00462844	0.00470933	0.00889396	0.00382048	0.021593	0.0117396	0.0119744	0.0447304	0	0	0.103811	0.160399	0.181585	0.00560824	0.00554256	0.00749477	0	0.01897	0.00903305	0.00641866	0.00879105	0	0.00392021	0.0120755	0.00749068	0.0122189	0
Gm28322	0	0	0	0	0	0	0	0	0	0	0	0	0	0	0	0	0	0	0	0	0	0	0	0	0	0	0	0	0	0	0	0	0	0	0	0	0	0	0	0	0	0	0	0	0	0	0	0	0
Gm28319	0	0	0	0	0	0	0	0	0	0	0	0	0	0	0	0	0	0	0	0	0	0	0	0	0	0	0	0	0	0	0	0	0	0	0	0	0	0	0	0	0	0	0	0	0	0	0	0	0
Gm29325	0	0	0	0.000502325	0	0	0	0	0	0	0	0	0	0	0	0.0010721	0	0	0	0	0	0	0.00127562	0	0	0	0.00172621	0	0	0	0	0	0.00235531	0.0168716	0.00262237	0	0	0	0	0	0	0	0	0	0	0	0	0	0
9330175M20Rik	0	0	0	0	0.000533816	0	0	0	0	0	0	0	0.00231344	0	0	0	0	0	0.00929009	0	0	0	0	0	0	0	0	0	0	0	0	0	0	0	0	0	0	0	0	0	0	0	0	0	0	0	0	0	0
Cavin2	0.640458	0.177132	0.0398211	0.116981	0.0667127	0.206417	0.0364272	0.0353991	0.0394385	0.0286538	0.413712	0.0324859	0.00693132	0.0303972	0.0370254	0.324693	0.15412	0.0888026	0.101225	0.10592	0.141424	0.0284861	0.0113336	0.00806125	0.0130782	0.297791	0.0341844	0.0216404	0.0366835	0.0248204	8.21895	0.775265	0.0328194	0.0444519	0.0883166	0.20214	0.00666974	0.00647332	0.00555803	0.0100243	0.187105	0.0593369	0.0628413	0.103971	0.0357332	0.0996665	0.0318595	0.050031	0.0565662
1700072G22Rik	0	0	0	0.000518164	0	0	0	0	0	0	0	0	0	0	0.00498362	0	0	0	0	0	0	0	0	0	0	0	0	0.000829438	0	0	0	0	0	0	0	0	0	0	0	0	0	0	0	0	0	0	0	0	0
Nabp1	0.00858926	0.00726402	0.0355044	0.0644412	0.0684713	0.0224822	0.0139298	0.02219	0.0162511	0.0285434	0.0435693	0.0731381	0.0310685	0.0793957	0.0455781	0.0346671	0.017561	0.0115615	0.0643976	0.0214605	0.0462086	0.0411053	0.0276319	0.0905544	0.0497451	0.0426457	0.0438526	0.0530499	0.0835245	0.0505009	0	0.0719383	0.0352892	0.075741	0.0709288	0.0186629	0.0379728	0.045796	0.0760993	0.0469897	0.0479893	0.00594916	0.00587574	0.0403277	0.0112329	0.0181663	0.0142584	0	0.0508239
Gm17767	0	0	0	0	0	0	0	0	0	0	0	0	0	0	0	0	0	0	0	0	0	0	0	0	0	0	0	0	0	0	0	0	0	0	0	0	0	0	0	0	0	0	0	0	0	0	0	0	0
Gm28055	0	0	0	0	0	0.0019544	0.0010902	0	0	0	0.00333178	0	0	0	0.00108681	0	0.0017081	0	0	0	0	0.00949574	0.00343844	0.00234875	0.000793705	0	0.0148672	0.00215641	0	0	0	0	0.00138131	0.00307954	0	0	0.0301265	0.00144303	0.00186757	0.00177673	0.00219928	0	0	0	0	0.00196092	0	0	0
Myo1b	2.62951	2.09913	0.580913	0.562924	0.540288	4.0497	3.44241	2.54645	3.30719	2.60698	3.77811	2.09389	0.706413	0.687693	0.796965	3.59914	3.78663	2.8235	3.0972	3.09128	3.18729	2.62627	1.93282	1.9534	2.23889	2.83655	2.92901	1.5897	1.67023	1.90647	0	0.891656	0.710256	0.612885	0.72374	3.4385	2.44573	1.13289	1.35499	1.58518	2.84891	3.1644	2.6883	2.59012	2.28331	3.03445	2.89536	2.91241	3.13519
Stat4	0	0	0.00385509	0	0	0.00151073	0.00117775	0	0.00338208	0	0	0	0	0	0	0	0	0	0.00696105	0	0	0	0.00112523	0.00254628	0	0	0	0	0.002179	0.00186293	0	0	0	0	0	0	0	0.00154506	0	0.00147249	0	0	0.0121552	0	0.00250239	0	0.00455731	0	0
Gm31812	0.0174092	0	0.0103325	0.00956961	0.0108458	0.00518453	0.00655525	0.00861484	0	0.00620682	0.00442328	0.0036791	0.00213681	0.0029723	0.00797832	0.00721776	0.00692806	0.00762225	0.0139418	0.00570241	0.0133755	0.00653712	0.0130349	0.00841308	0.0111808	0.0169519	0.0094903	0.0248376	0.0101559	0.0166275	0	0	0.00788113	0.00705328	0.0117335	0.00994144	0	0.012315	0.0121006	0.0238812	0.00761774	0.00790769	0	0.0129169	0.0155691	0.0039206	0.0107058	0.00508159	0.0310697
Stat1	0.151938	0.212282	0.257555	0.386277	0.400911	0.136841	0.187486	0.217322	0.243729	0.1688	0.123692	0.220588	0.148164	0.224954	0.235086	0.151195	0.205076	0.372586	0.286227	0.250277	0.149185	0.209296	0.245275	0.215898	0.187973	0.191268	0.328328	0.233567	0.28252	0.250056	0	0.147164	0.167405	0.323129	0.314348	0.181192	0.219224	0.167547	0.207953	0.180049	0.125083	0.146622	0.249294	0.210506	0.265709	0.111558	0.196433	0.225132	0.252086
Gls	5.4465	4.41629	3.91822	4.78527	3.83815	5.95936	5.97176	5.21683	7.36286	5.88117	5.02306	5.36144	3.6484	5.41221	4.43075	5.93891	5.41542	4.42797	6.67064	4.5493	5.02305	3.44085	2.58181	4.11525	3.16333	4.75199	3.36015	3.00604	3.76478	3.2079	0.821895	5.20756	4.21111	6.1493	5.44848	4.28183	2.88505	2.4901	3.38519	2.96777	7.34012	6.42769	5.37047	10.4936	6.44384	6.24839	5.27155	4.35859	6.44989
Nab1	0.321594	0.460298	0.582222	0.551056	0.525479	0.259535	0.301792	0.363165	0.301832	0.196493	0.209013	0.235564	0.339943	0.301689	0.369517	0.334105	0.503259	0.548484	0.38847	0.34429	0.203306	0.205631	0.220302	0.233505	0.223632	0.253041	0.159858	0.364286	0.209583	0.252133	0	0.387462	0.465812	0.379945	0.433427	0.199614	0.141527	0.348104	0.279128	0.232438	0.386235	0.515103	0.429734	0.393339	0.300866	0.298905	0.232516	0.207965	0.240764
Gm553	0	0	0.000874344	0.00198788	0	0.000784343	0.00156345	0	0	0.00226066	0	0	0	0	0	0.00223902	0.00394947	0	0	0	0	0.00138796	0	0	0	0	0	0.000807349	0	0	0	0	0	0	0.00213813	0	0.00414405	0	0	0	0	0	0	0	0	0	0	0	0
Gm28178	0	0	0.00078967	0	0	0	0	0	0	0	0	0	0	0	0	0	0	0	0	0	0	0	0	0	0	0	0	0	0	0	0	0	0	0	0	0	0	0	0	0	0	0	0	0	0	0	0	0	0
Nemp2	0.0642782	0.0369313	0.034937	0.0383614	0.0285249	0.0315372	0.0411586	0.0237335	0.0161949	0.0169125	0.00989326	0.0111379	0.0180382	0.043743	0.0246985	0.0238886	0.0309489	0.0413734	0.0241789	0.0622699	0.0511558	0.0373363	0.0469644	0.0500656	0.0571597	0.0760694	0.0450677	0.0477095	0.0513151	0.0401721	0	0.0509954	0.0392585	0.0424352	0.048221	0.0363338	0.0251051	0.0356849	0.0262752	0.0208905	0.0200433	0.0512009	0.0410011	0.0368715	0.0494393	0.047106	0.0324867	0.0693412	0.0240298
Mfsd6	0.214831	0.0835697	0.151681	0.127624	0.142678	0.0133484	0.0376287	0.0573685	0.0656443	0.0490286	0.0636357	0.0597541	0.0887537	0.0561338	0.110175	0.0203168	0.0506308	0.0964781	0.0458173	0.0389199	0.0156192	0.0147028	0.0337985	0.0283669	0.0378572	0.00511207	0.032604	0.0453661	0.0329237	0.0445204	0	0.272476	0.263709	0.232527	0.271302	0.0371286	0.00915713	0.0222567	0.0363788	0.0505886	0.0203123	0.0267648	0.0502911	0.0213215	0.0233729	0.0166418	0.0186939	0.0641904	0.0332674
Inpp1	0.222684	0.129701	0.111047	0.12082	0.119444	0.096848	0.0741344	0.0903217	0.0710666	0.0835749	0.100759	0.128335	0.086617	0.0726073	0.127628	0.0836508	0.138474	0.0809523	0.0867849	0.0908717	0.0974205	0.0859438	0.0812844	0.0717131	0.105048	0.079189	0.114896	0.0984349	0.0781704	0.0862887	0	0.0806348	0.075362	0.0945381	0.0715812	0.0240605	0.114641	0.0720007	0.0743095	0.0895128	0.078551	0.070951	0.101521	0.127917	0.0821163	0.124328	0.107586	0.0920317	0.0967612
Hibch	0.241159	0.232528	0.245769	0.345243	0.343278	0.272231	0.145651	0.237706	0.291763	0.308775	0.204635	0.179709	0.246707	0.39155	0.334507	0.268758	0.169571	0.150307	0.28644	0.275959	0.257072	0.206059	0.19331	0.356738	0.286753	0.208894	0.16372	0.185926	0.304074	0.235102	0.821895	0	0.183546	0.223853	0.274069	0.295237	0.219437	0.208266	0.30601	0.32867	0.273552	0.196873	0.179406	0.201338	0.373718	0.239863	0.211411	0.180561	0.224486
1700019D03Rik	0	0	0	0.00256883	0.000928836	0	0	0	0	0	0	0.00580959	0	0	0.00694358	0.00240021	0	0	0	0	0	0	0	0	0.000857711	0.00155949	0	0	0	0.00133133	0	0	0.00172754	0	0.00558406	0	0	0	0	0	0	0.00296018	0	0	0	0.00167889	0.00195726	0.00373899	0
Mstn	0	0	0	0	0	0	0	0	0	0	0	0	0	0	0	0	0	0	0	0	0	0	0	0	0	0	0	0	0	0	0	0	0	0	0	0	0	0	0	0	0	0	0	0	0	0	0	0	0
1700019A02Rik	0	0	0	0	0	0	0	0	0	0	0	0	0	0	0	0	0	0	0	0	0	0	0	0	0	0	0	0	0	0	0	0	0	0	0	0	0	0	0	0	0	0	0	0	0	0	0	0	0
Pms1	0.0628144	0.0392748	0.0307036	0.0468975	0.0301735	0.0504152	0.0504523	0.0475741	0.0520238	0.0862832	0.060247	0.0337974	0.027817	0.0302666	0.0366659	0.0546752	0.0562549	0.0545693	0.0384661	0.059191	0.107942	0.0754188	0.0845347	0.101673	0.0946814	0.0920758	0.0752546	0.0508958	0.0689058	0.0510649	0	0.104498	0.0189719	0.0233037	0.0322444	0.0597183	0.0210692	0.03589	0.0454636	0.0379934	0.0822313	0.0480829	0.0562615	0.079441	0.0840253	0.0944578	0.0835789	0.100337	0.0791169
Gm28777	0	0	0	0	0	0	0	0	0	0.0014936	0	0	0	0	0	0	0	0	0	0	0	0	0	0	0	0	0	0	0	0.00146909	0	0	0.00158084	0	0	0	0	0	0	0.00187011	0	0	0	0.00495536	0	0.00176846	0	0	0
Ormdl1	0.282847	0.171171	0.197466	0.219376	0.205515	0.230829	0.191267	0.165795	0.153729	0.2364	0.14665	0.155424	0.143288	0.161919	0.191043	0.227799	0.207608	0.26829	0.240622	0.280844	0.312352	0.2203	0.311944	0.240925	0.332002	0.241139	0.194925	0.203313	0.275462	0.229153	0	0.224236	0.185524	0.182938	0.174702	0.22608	0.18747	0.194867	0.186643	0.243456	0.206814	0.259206	0.252295	0.225663	0.244708	0.292379	0.263088	0.364297	0.211708
Gm28778	0	0	0	0	0	0	0	0	0	0	0	0	0	0	0	0	0	0	0	0	0	0	0	0	0	0	0	0	0	0	0	0	0	0	0	0	0	0	0	0	0	0	0	0	0	0	0	0	0
Osgepl1	0.0475126	0.103986	0.0728526	0.0795027	0.0989873	0.125331	0.100323	0.102794	0.0844653	0.0861589	0.0842536	0.0889989	0.0796232	0.0786961	0.0939692	0.134944	0.0879415	0.0910517	0.0947758	0.112288	0.156562	0.0996932	0.126932	0.156205	0.1133	0.170136	0.0981739	0.103061	0.124019	0.111874	0	0.0719383	0.0721831	0.0936899	0.0788177	0.118566	0.126058	0.103749	0.101043	0.100603	0.101121	0.114885	0.0364599	0.111641	0.111023	0.12892	0.0938581	0.172926	0.0570342
Gm28551	0	0	0.000825628	0	0.00933127	0	0	0.00248774	0	0	0	0	0.00379995	0.00170127	0.016706	0.00143075	0	0	0	0	0.00149993	0.00139379	0.00174385	0	0.000947854	0.00554105	0.00490084	0.00218948	0	0.00106357	0	0	0.00134036	0	0.00184412	0.00789171	0	0.00422745	0.00287145	0	0.00182355	0	0	0	0	0.0018711	0.0047877	0.00480928	0
Asnsd1	0.279016	0.164218	0.149953	0.119539	0.171923	0.134108	0.0887329	0.099182	0.114224	0.158056	0.101482	0.0975784	0.166994	0.137011	0.18322	0.135987	0.11011	0.0961695	0.0533116	0.187479	0.133047	0.161201	0.176508	0.182937	0.204393	0.163739	0.140079	0.187717	0.18712	0.185327	0	0.261542	0.119793	0.130252	0.15902	0.079902	0.0977109	0.183947	0.123444	0.182235	0.169989	0.11418	0.129598	0.0848678	0.17655	0.160454	0.124938	0.174638	0.12654
Dnah7a	0	0.0102793	0.00213547	0.00382065	0.00962665	0.00724749	0.00275208	0.0042861	0.00382544	0.00472844	0.0227921	0.00453078	0.00722992	0.00308565	0.0181174	0.0048478	0.00591256	0	0.00584328	0.00587801	0.00769941	0.00950472	0.00560197	0.00535198	0.00455581	0.0264371	0.00722746	0.0132349	0.00530117	0.0164544	0	0	0.0133946	0.0367952	0.0434951	0.011902	0.0397108	0.00754843	0	0.0112027	0.0056115	0.00653162	0.0143515	0.00520313	0.0170265	0	0.00712001	0.00550115	0.011851
Stk17b	0.14406	0.193376	0.113627	0.139557	0.137218	0.168391	0.112746	0.0983806	0.156138	0.186326	0.176056	0.109699	0.110145	0.149934	0.171658	0.18444	0.195469	0.235737	0.210661	0.187202	0.0976998	0.158793	0.148028	0.171014	0.197879	0.342501	0.269981	0.282022	0.373963	0.419682	2.46569	0.267736	0.133181	0.127368	0.233423	0.185793	0.0969406	0.135208	0.201432	0.194568	0.14183	0.139554	0.159338	0.166027	0.163039	0.11609	0.137528	0.184943	0.197258
Hecw2	0.232286	0.144614	0.0685242	0.0595107	0.0786849	0.450652	0.183382	0.263593	0.304874	0.245972	0.246176	0.191046	0.134547	0.0972977	0.170998	0.344996	0.226129	0.266895	0.349055	0.316808	0.308975	0.203185	0.189719	0.197097	0.193718	0.346324	0.185743	0.167531	0.171208	0.137207	0	0.118555	0.138814	0.114961	0.125734	0.325247	0.214927	0.115664	0.143158	0.159794	0.484729	0.288486	0.231877	0.406566	0.342851	0.389648	0.238059	0.283299	0.275893
Ccdc150	0	0	0.00295882	0.00173771	0	0.00370772	0.000955956	0	0	0.0013884	0.00312662	0.00482169	0.00298068	0	0.00163328	0.002581	0	0.00362319	0.0069847	0.00317731	0.00419239	0	0.00538004	0.00418031	0.00253449	0.0124462	0.0169772	0.0111573	0.00646148	0.000910222	0	0	0	0	0	0	0.00898307	0.00273868	0.00251095	0.00282216	0	0.00347591	0	0	0	0.00167436	0.00810067	0.00453333	0
Gtf3c3	0.327691	0.176878	0.177017	0.226794	0.209167	0.220176	0.212652	0.167376	0.236338	0.225665	0.198586	0.180729	0.207529	0.240804	0.204734	0.240675	0.272798	0.178399	0.251341	0.299913	0.213238	0.156545	0.129864	0.199035	0.19755	0.267969	0.216713	0.18897	0.237885	0.216278	0.821895	0.344014	0.16301	0.217833	0.221648	0.225606	0.166803	0.160578	0.152625	0.207103	0.282047	0.251441	0.183383	0.219759	0.238388	0.243668	0.223205	0.184757	0.228015
Gm34066	0	0	0	0	0	0	0	0	0	0	0	0	0	0	0	0	0	0	0	0	0	0	0	0	0	0	0	0	0	0	0	0	0	0	0	0	0	0	0	0	0	0	0	0	0	0	0	0	0
Pgap1	0.0340639	0.0397636	0.0219388	0.0459921	0.0254395	0.0251183	0.0176625	0.0378589	0.0211542	0.0314113	0.0433864	0.0176547	0.0139399	0.0120979	0.0153003	0.0392276	0.0443346	0.0195851	0.049065	0.0391286	0.0236313	0.038213	0.027257	0.026093	0.0282358	0.0310564	0.035316	0.0240938	0.0364514	0.0439186	0	0.0522488	0.0215443	0.0265699	0.0292409	0.0262474	0.0243959	0.0238302	0.013476	0.0139369	0.0271322	0.0339324	0.0573414	0.0169634	0.026976	0.0279602	0.0371513	0.0491708	0.0178323
Ankrd44	0.0887692	0.0410634	0.0978312	0.0459356	0.067076	0.0236883	0.0206689	0.0325235	0.0359366	0.0174908	0.029628	0.0302913	0.0584259	0.0301185	0.0380466	0.0122119	0.00721548	0.0113373	0.00869605	0.00678295	0.0769125	0.0736897	0.106605	0.112413	0.0690926	0.0300612	0.0292414	0.0750176	0.0583819	0.0708776	0	0.0509954	0.0603384	0.126805	0.117856	0.0086186	0.0468299	0.0576027	0.0464218	0.054511	0.0129552	0.0210015	0.0350023	0.00444342	0.0158204	0.0188103	0.0313497	0.0690545	0.0371659
4930444A19Rik	0	0	0	0	0	0	0	0	0	0	0	0	0	0	0	0	0	0	0	0	0	0	0	0	0	0	0	0	0	0	0	0	0	0	0	0	0	0	0	0	0	0	0	0	0	0	0	0	0
Sf3b1	4.00063	3.91483	3.43683	3.59831	2.6706	3.18642	3.64903	3.70232	3.2771	2.63855	3.47355	3.91948	3.27371	3.29151	2.35118	3.06716	3.9728	4.02039	3.32069	3.05428	2.94644	3.7361	3.65617	3.16205	2.71515	3.53858	4.44997	3.96501	3.58836	3.09442	4.10948	3.48902	3.27101	3.2832	2.62788	3.46163	3.85033	3.43873	2.89085	2.58717	3.31305	3.63392	3.76205	3.65433	2.96597	3.13095	3.5525	3.59863	3.2371
Coq10b	1.2537	1.29832	0.792748	1.23042	0.817553	0.596823	0.80508	0.996097	0.927665	0.868006	0.727276	0.84284	0.737306	0.887292	0.572717	0.56388	1.00873	1.3756	1.47508	0.942891	0.545702	0.565949	0.52194	0.623913	0.489169	0.458327	0.481833	0.57979	0.449396	0.481149	0	1.14191	0.84227	0.918959	0.747596	0.586329	0.488986	0.499704	0.526433	0.442644	0.432623	0.676378	0.816226	0.920721	0.604523	0.553148	0.614323	0.930424	0.718714
Hspd1	4.34482	4.97067	4.37189	3.56836	4.68683	6.29648	8.06715	6.9929	7.13709	7.85517	5.97766	7.83594	5.83354	6.09245	6.00236	5.13706	5.72985	4.50481	4.36814	4.13284	9.31077	11.6703	9.67273	9.78366	9.07645	7.37402	9.30904	7.01922	6.99412	6.76524	3.28758	3.63868	3.75248	3.12424	3.48756	7.36906	8.9462	7.34835	6.69126	6.56018	6.00141	6.89264	5.38563	6.5894	6.24204	8.22579	10.2556	9.51104	9.09496
Hspe1	4.92941	6.32273	5.45047	5.04261	6.82273	6.19255	8.11425	7.08642	7.26875	8.22636	6.60493	8.70527	7.29919	7.36203	8.23988	5.46438	6.82046	5.28901	5.86262	6.45839	8.09005	11.5841	9.74616	9.67032	10.2833	6.39234	10.2197	7.33149	7.71711	8.51144	6.57516	6.71564	5.74314	5.21296	6.02902	7.60276	9.71092	8.21856	8.75862	9.76663	5.99022	7.50098	6.05646	6.99169	7.45944	7.22056	9.71911	8.48935	9.42687
Mob4	0.919912	0.719119	0.686837	0.674215	0.824508	0.710295	0.687782	0.686041	0.60337	0.666012	0.572789	0.507124	0.493831	0.523427	0.650513	0.728555	0.767408	0.851928	0.766299	0.831336	0.5547	0.459499	0.448127	0.516005	0.613306	0.634685	0.615216	0.581652	0.640662	0.686911	1.64379	0.104498	0.637564	0.716281	0.815482	0.697812	0.500603	0.548436	0.521489	0.640517	0.707867	0.829337	0.764831	0.814119	0.662017	0.611472	0.651211	0.579509	0.479648
Rftn2	0.0136224	0	0.00364876	0.0101939	0.00952135	0.00186687	0.000897829	0.00449809	0	0	0	0.00251753	0	0.00396209	0.00557596	0.00301781	0.00343208	0	0	0.0050766	0.00508026	0.00574649	0.000469114	0.00541115	0.000946749	0.00529367	0.00140588	0.00587524	0.00739019	0.000955739	0	0	0.0120871	0.0087143	0.0114932	0.0102051	0	0.00249673	0.00797827	0.00161425	0.00124672	0.00306178	0.0101699	0	0.00687501	0.00175931	0	0.00741118	0
Gm10561	0	0	0.0062773	0.0010265	0.0126615	0.000708113	0	0	0	0	0	0	0.00109083	0	0.00110705	0	0.00195154	0.00482373	0	0	0.00272947	0	0.00528595	0.0042492	0.00086862	0	0	0.00188513	0	0.00218257	0	0	0.00220002	0.0047007	0.0112261	0	0.00979614	0.00372619	0.00490481	0	0.00186915	0	0	0	0	0	0	0	0
Mars2	0	0.0471339	0.0172616	0.031985	0.0418478	0.0142149	0.0224362	0.0284774	0.0145123	0.0190585	0.0267749	0.0201979	0.0377693	0.0266793	0.0454156	0.00918031	0.0141332	0.0298665	0.0127286	0.00826645	0.0185342	0.00441801	0.0231881	0.0225623	0.0316259	0.0206875	0.0345642	0.0291589	0.024381	0.0270514	0	0.0961686	0.0245501	0.0489966	0.0539758	0.0184293	0.0390829	0.0235416	0.0159075	0.0158557	0.0109013	0.00965263	0.00770416	0.0120283	0.016836	0.0295795	0.0175953	0.0332979	0.0316897
Boll	0	0	0	0	0	0	0	0	0	0	0	0	0	0	0	0	0	0	0	0	0	0	0	0	0	0	0	0	0	0	0	0	0	0	0	0	0	0	0	0	0	0	0	0	0	0	0	0	0
Plcl1	0.0928704	0	0.00823374	0.00873165	0.0166295	0.00179277	0.00554902	0.00397257	0.00669691	0.00215328	0	0	0.00481601	0.00309221	0.00416126	0.000972665	0.0061412	0.00826644	0.00683799	0.00257578	0.00463535	0	0	0	0.00111038	0.0107051	0.001808	0.00340779	0.00135168	0.00217364	0	0.147076	0.0120939	0.0262248	0.0152567	0	0	0	0	0	0.00910589	0.00647808	0	0	0	0.00770844	0	0	0
9130227L01Rik	0	0	0	0	0	0	0	0	0	0	0	0	0	0	0	0	0	0	0	0	0	0	0	0	0	0	0	0	0	0	0	0	0	0	0	0	0	0	0	0	0	0	0	0	0	0	0	0	0
1700003I22Rik	0	0	0	0	0	0	0	0	0	0	0	0	0	0	0	0	0	0	0	0	0	0	0	0	0	0	0	0	0	0	0	0	0	0	0	0	0	0	0	0	0	0	0	0	0	0	0	0	0
Gm28240	0	0	0	0	0	0	0	0	0	0	0	0	0	0	0	0	0	0	0	0	0	0	0	0	0	0	0	0	0	0	0	0	0	0	0	0	0	0	0	0	0	0	0	0	0	0	0	0	0
Hsfy2	0	0	0	0	0	0	0	0	0	0	0	0	0	0	0	0	0	0	0	0	0	0	0	0	0	0	0	0	0	0	0	0	0	0	0	0	0	0	0	0	0	0	0	0	0	0	0	0	0
Satb2	0	0	0.00159069	0.0071997	0.00288429	0.00107347	0.00315672	0.00641818	0	0.00202784	0	0.00527363	0	0.0125277	0.00296091	0.00468249	0.00388043	0.00741343	0	0.00270797	0.00248077	0.00320334	0	0.00357398	0.00497623	0.0027309	0	0.0020024	0.00570509	0.0039819	0	0	0.00259947	0.0117603	0.0106629	0	0.0044451	0.00139204	0.00965251	0.00171073	0.00470847	0	0	0	0.00214868	0	0	0.00538573	0
1700126A01Rik	0	0	0	0	0	0	0	0	0	0	0	0	0	0	0	0	0	0	0	0	0	0	0	0	0	0	0	0	0	0	0	0	0	0	0	0	0	0	0	0	0	0	0	0	0	0	0	0	0
BC055402	0	0	0	0	0	0	0	0	0	0	0	0	0	0	0	0	0	0	0	0	0	0	0	0	0	0	0	0	0	0.00142477	0	0	0	0	0	0	0	0	0	0	0	0	0	0	0	0	0	0	0
4930558J18Rik	0	0	0	0.000941149	0	0	0	0.0037776	0	0	0.00421668	0.00239538	0	0	0	0	0	0	0	0	0.00154899	0.00295539	0.0062472	0.0066988	0.0058832	0.0329889	0.0490793	0.0318288	0.0268696	0.0288224	0	0	0.00300554	0.00195313	0	0	0	0.00239463	0	0.00264839	0	0	0	0.00610976	0	0	0	0	0
1700066M21Rik	0.0132895	0	0.00938571	0.0157337	0.015931	0.0160767	0.018137	0.0203827	0.0183124	0.0397071	0.0120499	0.0135892	0.00373944	0	0.0287503	0.0150769	0.0211433	0.0172327	0.0456613	0.0489905	0.0140259	0.0143052	0.012549	0.0216984	0.0262576	0.0462342	0.0308611	0.0473612	0.0723804	0.0811662	0	0	0.0186192	0.0198451	0.0292121	0.0114961	0.0145565	0.0109844	0.0121225	0.0115639	0.0180964	0.0298111	0.0486939	0.0107947	0.0320867	0.0170776	0.00842046	0.00563793	0.00620406
Tyw5	0.0969014	0.0582703	0.0577934	0.0862479	0.117527	0.0870625	0.039709	0.0495252	0.0885378	0.0902542	0.0808635	0.0200511	0.0297897	0.0730994	0.107017	0.0958651	0.0523956	0.0500101	0.156813	0.154504	0.0708476	0.0524312	0.0468553	0.0828768	0.0860923	0.122751	0.0591373	0.0561824	0.0890343	0.103399	0	0	0.0426842	0.0981802	0.114087	0.0922915	0.0683165	0.0221932	0.0990405	0.109995	0.0806407	0.052511	0.0939327	0.136944	0.109356	0.0990576	0.0733304	0.0254757	0.0874253
Maip1	0.378603	0.383809	0.268815	0.318328	0.386424	0.391556	0.327293	0.370281	0.287473	0.45454	0.358194	0.329128	0.313497	0.358991	0.398406	0.423876	0.334049	0.268635	0.292433	0.439849	0.412278	0.366039	0.327563	0.391177	0.414537	0.46896	0.414645	0.320269	0.445549	0.451489	0.821895	0.314461	0.228423	0.303278	0.423491	0.372537	0.312372	0.299359	0.420114	0.43927	0.455901	0.421309	0.310752	0.422559	0.545128	0.465167	0.342843	0.480856	0.352203
Spats2l	0.0727273	0.111007	0.100016	0.067439	0.111793	0.0494786	0.0460144	0.102508	0.0887951	0.0685686	0.0430315	0.0776413	0.0744869	0.0793605	0.0995572	0.0512828	0.0756969	0.0942818	0.0170804	0.0355725	0.0546234	0.0350141	0.0351555	0.0312724	0.0361883	0.0755281	0.0431665	0.0510245	0.037296	0.0547022	0.821895	0.250837	0.14425	0.137436	0.142278	0.0398248	0.0412319	0.0245934	0.0261757	0.0363054	0.0530374	0.0522463	0.0375265	0.0413481	0.0617222	0.0705347	0.0662364	0.0403728	0.0180079
Gm17234	0	0	0	0	0	0	0	0	0	0	0	0	0	0	0	0	0	0	0	0	0	0	0	0	0	0	0	0	0	0	0	0	0	0	0	0	0	0	0	0	0	0	0	0	0	0	0	0	0
Kctd18	0.0913191	0.0725881	0.0769128	0.0951497	0.121722	0.0687858	0.0623766	0.0808577	0.045186	0.0763885	0.098527	0.0729358	0.0521111	0.0582786	0.0944737	0.0727747	0.0657164	0.0735751	0.020628	0.148214	0.0478877	0.0334948	0.0477177	0.0623591	0.0612345	0.0936605	0.0486398	0.0554513	0.143379	0.0893398	0	0.0806348	0.0710462	0.0823261	0.146008	0.0709987	0.0414213	0.041258	0.072875	0.0658429	0.0632399	0.0861467	0.097504	0.0476268	0.0722254	0.0582508	0.0662542	0.0339316	0.0198547
Sgo2a	0.0200724	0.0110304	0.0241518	0.0152907	0.022763	0.0150709	0.0148292	0.0224929	0.0190153	0.0124565	0.0152478	0.0106006	0.018515	0.0127867	0.0140842	0.0152384	0.014452	0.036349	0.0127278	0	0.176631	0.111741	0.0792203	0.107389	0.142805	1.71098	1.22352	1.1738	1.45452	1.5908	0	0	0.015332	0.0117391	0.017592	0.0151078	0.0306761	0.0296592	0.00976724	0.0183641	0.01225	0.0142419	0.0144854	0.00876876	0.0195635	0.030679	0.0474115	0.0365539	0.0430888
Aox1	0.0880631	0.0323393	0.0123474	0.0183789	0.0103253	0.0103225	0.00647351	0.0165004	0.0181141	0.00675776	0.0213373	0.0047258	0.0159208	0.00863838	0.0145199	0.0172415	0.00550487	0.0251739	0.0205304	0.0140483	0.00736802	0.0160051	0.0154672	0.0100842	0.00676025	0.0166773	0	0.000845146	0.00154917	0.00153236	0	0.066306	0.00967992	0.00937491	0.0152392	0	0	0.00663508	0.0105305	0.014266	0.0216497	0.00663368	0.0183838	0.0458715	0.0135268	0.0149066	0.00444198	0.00388505	0.0215723
Aox3	0	0	0.00182402	0	0.000965717	0.000548888	0.00303595	0	0	0	0	0	0	0	0	0	0	0	0.00596093	0.00250829	0	0	0.00113141	0	0.00051746	0	0	0	0	0.00176722	0	0	0	0	0	0	0.0037548	0.00158276	0	0	0	0	0.0066094	0	0	0	0	0	0
Aox4	0	0	0.0139138	0.00960674	0.00509678	0.00592929	0.00907196	0.0262146	0	0.00586772	0	0	0.0118956	0.0132496	0.00435949	0.00446399	0.00821733	0	0.00639375	0.00266093	0.017386	0.0365615	0.0814232	0.0410027	0.0364044	0.0127804	0.0278105	0.0517357	0.0422877	0.0307601	0	0	0.00131181	0	0	0.00923522	0.0194114	0.0644798	0.0751763	0.0313324	0.00294161	0.00821925	0.0242771	0.00702487	0.0109799	0.00489712	0.00789155	0.0205829	0.0130873
Gm15759	0	0	0	0	0	0.00189804	0	0	0	0	0	0	0	0	0	0	0	0	0	0	0	0.00174046	0.00109551	0	0	0.0024189	0	0.00098723	0	0	0	0	0	0	0	0	0	0	0	0	0	0	0	0	0	0	0	0	0
Aox2	0.0118754	0	0.00321263	0.0083878	0.00762763	0.00832687	0.00237601	0	0	0.00366441	0.00480095	0.00367771	0.00289953	0.0111635	0.00497636	0.00270087	0	0	0	0.00685301	0.0148731	0.00361206	0.00327777	0.00487562	0.00567321	0.00837343	0.00159907	0.00224603	0.00851137	0.00827628	0	0	0.00148776	0.00317087	0.00540595	0.0165701	0	0.00272953	0.00483761	0.0109078	0.00159941	0	0	0	0.011877	0	0	0	0.00474793
Bzw1	5.52542	5.44468	5.37275	6.58163	7.26089	4.60381	4.34339	3.53163	3.56612	3.23193	5.27508	4.03257	3.60933	5.10838	4.35111	4.47725	4.64526	3.84302	3.6496	3.07553	4.07749	3.6971	2.86216	3.5316	3.18148	3.69418	3.40708	2.92711	3.60742	3.46421	3.28758	6.13979	5.2725	7.26117	5.64813	4.8963	3.32194	2.85549	3.55881	3.10394	3.94468	4.12422	3.1219	3.48428	3.04425	4.0951	4.1619	3.43474	3.44713
Clk1	5.10514	5.48866	3.7639	3.73991	3.29017	3.5732	4.26616	4.05496	3.83192	2.9901	4.28324	4.75776	4.17048	3.6477	3.88658	3.62572	4.66283	5.0037	4.24169	3.66597	2.93355	3.29231	3.31386	2.73903	2.31174	3.06084	3.00344	3.61045	2.92645	2.79655	4.93137	5.83929	4.35669	4.34675	4.50446	3.22347	3.6628	3.5099	2.85663	2.585	3.52277	3.83323	4.38002	3.89073	2.75403	3.18724	3.48471	3.57512	3.50152
Ppil3	0.409629	0.404365	0.369063	0.339863	0.437571	0.46107	0.351374	0.328655	0.294847	0.43022	0.414473	0.276409	0.331801	0.352905	0.406196	0.398666	0.339936	0.269218	0.345389	0.397053	0.429266	0.370696	0.340349	0.411151	0.404049	0.433359	0.385968	0.315252	0.324148	0.389628	0.821895	0.398834	0.345017	0.478172	0.346594	0.453734	0.294415	0.366993	0.371843	0.446518	0.403399	0.363947	0.299334	0.328915	0.380732	0.434145	0.363193	0.290962	0.35215
Nif3l1	0.0997414	0.149949	0.193173	0.151913	0.207848	0.22051	0.242984	0.151658	0.0970895	0.187606	0.16915	0.132278	0.146932	0.119757	0.169656	0.211547	0.160776	0.16607	0.135363	0.202826	0.197115	0.208995	0.205889	0.12857	0.238869	0.268302	0.339845	0.212277	0.223653	0.189236	0.821895	0.187278	0.150026	0.169417	0.175678	0.234803	0.18125	0.172527	0.195415	0.199088	0.203579	0.198064	0.159552	0.181489	0.238908	0.277548	0.195307	0.246417	0.181979
Orc2	0.203598	0.307681	0.256576	0.263029	0.336423	0.326756	0.330745	0.292409	0.270786	0.355743	0.305369	0.345382	0.279038	0.300748	0.294943	0.312391	0.271438	0.223507	0.257512	0.266466	0.607211	0.594911	0.38545	0.505869	0.546812	0.452822	0.42234	0.360228	0.436272	0.420933	0	0.414776	0.265723	0.183043	0.282781	0.396704	0.416855	0.320432	0.341665	0.386104	0.327655	0.355237	0.342194	0.362391	0.312612	0.424561	0.571849	0.495367	0.451938
Gm15834	0	0.0855385	0.00709195	0.0113814	0.00709205	0.0137827	0.00679482	0.00440323	0.00987766	0.0171215	0.00394247	0.00232079	0.00628326	0.00892709	0.019304	0.0177709	0.00593907	0.00938035	0.0240549	0.0338225	0.00839223	0.00529472	0.00387397	0.00530717	0.00476612	0.00939435	0.00698	0.00471799	0.00452736	0.00513911	0	0	0.0128939	0.010792	0.00742992	0.0096745	0.00343156	0.00326837	0.00598117	0.0177881	0.00976218	0.0188138	0.0280897	0.0209213	0.0273159	0.0104501	0.0108261	0.00246806	0
Fam126b	0.311419	0.60736	0.853848	0.66534	0.804003	0.181807	0.379942	0.596453	0.333307	0.658834	0.273135	0.633182	0.772484	0.637955	0.729067	0.179352	0.281727	0.415441	0.268424	0.369225	0.1811	0.314432	0.498953	0.331848	0.357064	0.214202	0.392749	0.503973	0.317072	0.432252	0	1.15883	0.956136	0.778174	1.00549	0.237375	0.56096	0.70697	0.477392	0.465394	0.164446	0.309538	0.446781	0.190278	0.39002	0.155063	0.261658	0.357435	0.257771
Ndufb3	1.21407	0.618566	0.817944	1.28802	1.5896	1.01335	0.671126	0.644434	1.23481	1.31128	1.06911	0.651911	0.786815	1.4172	1.52479	0.960975	0.593237	0.576493	1.01448	1.22652	1.04336	0.932276	1.0407	1.68451	1.71294	1.26653	0.970337	0.931175	1.46205	1.71917	1.64379	0.529147	0.779067	1.14143	1.34398	1.10413	1.17439	1.20086	1.7076	1.91495	1.07976	0.64149	0.547269	1.06966	1.22665	0.979571	0.731693	0.647124	1.23617
Als2cr12	0	0	0.00200314	0.00414254	0.00224712	0	0	0	0	0	0	0	0.00145606	0	0.00671904	0	0	0	0	0.00437871	0	0	0	0	0	0	0	0.00313989	0	0	0	0	0.00514182	0.00488283	0	0	0	0	0	0	0	0	0	0	0	0.00162284	0	0	0
Cflar	0.568617	0.627163	0.451361	0.610723	0.675677	0.385666	0.439999	0.471178	0.429294	0.451796	0.475345	0.478582	0.471901	0.467422	0.603161	0.422653	0.492707	0.59782	0.496113	0.65781	0.259336	0.320246	0.380106	0.328679	0.441412	0.353049	0.393165	0.512763	0.491791	0.57434	0	0.688762	0.508826	0.66187	0.72121	0.349209	0.451457	0.519337	0.465047	0.635039	0.389772	0.38712	0.288757	0.494087	0.50929	0.297331	0.409292	0.269547	0.367986
Casp8	0.153855	0.03257	0.091124	0.134327	0.144098	0.175361	0.123808	0.103338	0.0950685	0.129779	0.15923	0.0640994	0.0634359	0.0799987	0.121699	0.187946	0.0993489	0.181602	0.105413	0.204722	0.336297	0.183309	0.192004	0.227142	0.232179	0.24736	0.198556	0.0911875	0.150092	0.1841	0.821895	0	0.083747	0.12989	0.162532	0.109967	0.0927862	0.0962693	0.180801	0.143023	0.201506	0.12524	0.113533	0.184435	0.153781	0.320612	0.242384	0.23045	0.271723
Trak2	0.273656	0.230626	0.201137	0.212108	0.1958	0.254234	0.302512	0.267928	0.234117	0.289472	0.210252	0.31827	0.180835	0.227123	0.171954	0.210775	0.299909	0.328795	0.353336	0.295317	0.181467	0.203879	0.178071	0.220855	0.172744	0.230804	0.238583	0.184387	0.214795	0.229076	0	0.272824	0.148068	0.2154	0.231281	0.243666	0.216618	0.156021	0.219083	0.197194	0.226436	0.318873	0.313672	0.212619	0.256159	0.205908	0.248754	0.214381	0.253592
Stradb	0.134773	0.073596	0.108626	0.135441	0.119352	0.131915	0.160098	0.127758	0.106167	0.20926	0.184796	0.152387	0.11387	0.134014	0.150713	0.153853	0.111055	0.106375	0.133862	0.166283	0.139527	0.113234	0.0976278	0.105553	0.14647	0.168132	0.119475	0.0953025	0.0957635	0.121405	0	0.105791	0.140979	0.127928	0.131573	0.143157	0.0674645	0.106759	0.108764	0.170236	0.10646	0.158032	0.158061	0.139538	0.173991	0.141491	0.116707	0.10275	0.163211
C2cd6b	0	0	0	0	0	0	0	0.00268869	0	0	0	0	0	0	0	0	0	0	0	0.00373996	0	0	0.00141267	0.00627936	0	0	0	0	0	0	0	0	0	0	0	0	0	0	0	0	0	0	0	0	0	0	0	0	0
Gm29018	0	0	0	0	0	0	0	0	0	0	0	0	0	0	0.00244297	0	0	0	0	0	0	0	0	0	0.001011	0	0.00142907	0.00172573	0	0	0	0	0	0	0	0	0	0.00130807	0.00175848	0	0	0	0	0.00671577	0	0	0	0	0
C2cd6	0	0	0	0	0.000965717	0.0011324	0.00111981	0	0	0	0	0	0	0	0	0	0	0	0	0	0	0	0	0	0	0	0	0	0	0	0	0	0	0	0	0	0	0	0	0	0	0	0	0	0	0	0	0	0
Tmem237	0.397793	0.199325	0.234437	0.341942	0.419341	0.319165	0.196072	0.225947	0.224188	0.320262	0.309803	0.194087	0.181316	0.220903	0.312566	0.377067	0.312721	0.304362	0.380202	0.420599	0.33554	0.213316	0.254463	0.299602	0.43866	0.522318	0.288444	0.317198	0.499637	0.527258	0.821895	0.210178	0.219276	0.266094	0.263842	0.341215	0.305919	0.198923	0.36607	0.35697	0.341898	0.275258	0.269948	0.339605	0.399372	0.329687	0.303696	0.292444	0.439369
G730003C15Rik	0.0217486	0	0.00286465	0.00604247	0.00621539	0.0133931	0.0153928	0.00495774	0.00704903	0.0150657	0.0038721	0.0100479	0.00381579	0.00345665	0.0051303	0.0281031	0.0171508	0	0.00377631	0.0188309	0.0194273	0.0125661	0.00376809	0.0148194	0.00715849	0.0278999	0.0205407	0.00558406	0.0222616	0.00632627	0	0	0.00985911	0.00619827	0.0130321	0.0176873	0.0128982	0.0117646	0.00791588	0.00545276	0.0248854	0.0140798	0.015698	0	0.031286	0.00862622	0.00186875	0	0.0243935
Mpp4	0.00858926	0	0.000817767	0.00120138	0.0010201	0.000809316	0	0.00202468	0	0	0.00333178	0	0.00101884	0.00338329	0.000666646	0	0	0	0.0134021	0	0	0.0090665	0.000670033	0.00167198	0.00311647	0.00249154	0.00255667	0.000742718	0.00864325	0.00705903	0	0	0.0033487	0.0100956	0.00251491	0	0	0.00318817	0.00251438	0.0019036	0.00388987	0	0	0	0.00231743	0.00466131	0	0	0.00514468
Gm29017	0	0	0	0	0	0	0	0	0	0	0	0	0	0	0	0	0	0	0	0	0	0	0	0	0	0	0	0	0	0	0	0	0	0	0	0	0	0	0	0	0	0	0	0	0	0	0	0	0
Als2	0.0209461	0.0294075	0.025205	0.035952	0.0419353	0.0297212	0.0236435	0.0204677	0.0518068	0.0541458	0.0275587	0.0243799	0.0139861	0.0233862	0.0241081	0.0420289	0.0510826	0.0341621	0.0409299	0.0451537	0.0385395	0.0350907	0.0303188	0.0405054	0.0422503	0.0337611	0.0297489	0.0291606	0.0338892	0.0380586	0	0	0.0222862	0.0514263	0.050795	0.0252297	0.00763574	0.0270447	0.0315129	0.0225291	0.0273048	0.029224	0.0244285	0.079405	0.0301153	0.023136	0.0209646	0.00662694	0.0460761
Cdk15	0	0	0	0.00118345	0.00274452	0	0	0	0	0	0	0	0	0.00181875	0	0	0	0	0	0	0	0	0	0	0.00139069	0	0	0	0	0.00111337	0	0	0	0	0	0	0	0.00286828	0	0	0.00200772	0	0	0	0	0	0	0	0
Gm29016	0	0	0	0	0	0	0	0	0	0	0	0	0	0	0	0	0	0	0	0	0	0	0	0	0	0	0.00133765	0.000797532	0.00124572	0	0	0	0	0	0	0	0	0	0	0	0	0	0	0	0	0	0	0	0
Fzd7	0.0480601	0.0886252	0.0552147	0.0690746	0.0996366	0.04817	0.0416507	0.0260572	0.0467287	0.0445316	0.0678448	0.0714531	0.0513112	0.0721399	0.0967294	0.0503998	0.0367396	0.0411857	0.0737318	0.0564885	0.0525012	0.0387206	0.0532709	0.0476688	0.0357142	0.061782	0.04837	0.0504414	0.0876537	0.0844824	0	0.124533	0.076631	0.0997591	0.095016	0.0102051	0.0465805	0.0303688	0.0461339	0.0387716	0.0692839	0.0403998	0.0350663	0.0529072	0.0467792	0.0471574	0.0185884	0.0285032	0.0181716
Gm26813	0	0	0.00345379	0.00138931	0	0	0.00282636	0	0	0	0	0.0019138	0.00396176	0	0.00334232	0.00112149	0.00396043	0	0	0	0.00172839	0	0.00161568	0	0	0	0	0	0.00101441	0	0	0	0	0	0	0	0	0.00111916	0	0	0	0.00263032	0	0	0	0	0	0	0
Gm973	0	0	0	0.000518164	0.00192689	0	0	0.00481377	0	0	0	0.00216313	0	0	0	0	0	0	0	0	0	0	0	0	0.00260085	0.0018757	0	0.000637631	0.00365667	0	0	0	0.00259211	0	0	0	0	0	0	0.00171127	0	0	0	0	0	0.00166262	0	0	0
Gm28411	0	0	0	0	0	0	0	0	0	0	0	0	0	0	0	0	0	0	0	0	0	0	0	0	0	0	0	0	0	0	0	0	0	0	0	0	0	0	0	0	0	0	0	0	0	0	0	0	0
1700122D07Rik	0	0	0	0	0	0	0	0	0	0	0	0	0	0	0	0	0	0	0	0	0	0	0	0	0	0	0	0	0	0	0	0	0	0	0	0	0	0	0	0	0	0	0	0	0	0	0	0	0
Sumo1	1.5938	1.60223	1.51138	1.60595	1.67637	1.64957	1.6303	1.61835	1.40165	1.51891	1.47968	1.40806	1.35605	1.51908	1.45156	1.70097	1.67651	1.55648	1.66712	1.59876	1.79867	1.77336	1.6177	1.55608	1.7125	1.67628	1.68189	1.37321	1.52466	1.65255	1.64379	1.8196	1.49684	1.5467	1.76056	1.62619	1.59295	1.62001	1.63156	1.75216	1.83123	1.71355	1.69035	1.73094	1.58957	1.81626	1.82456	1.73409	1.69732
Nop58	2.30213	2.12695	1.64093	1.67991	1.46155	2.11723	2.87346	2.36381	2.70199	2.24815	2.33751	3.07495	2.22848	2.51118	2.04154	1.95896	2.04771	2.1912	2.88539	1.56973	3.47275	3.64714	3.22376	3.67654	2.86985	2.88107	3.09424	2.66312	2.98982	2.43534	1.64379	1.44864	1.64017	1.67334	1.65246	2.66419	2.75942	2.43646	2.68548	2.2572	2.19427	2.31189	2.00612	2.99778	2.10742	3.21696	3.16268	3.65118	3.89849
Bmpr2	1.20792	1.86843	4.28913	4.56602	5.4949	1.06838	1.60017	2.04789	2.02979	2.22653	1.26057	2.50203	4.70497	5.75973	5.95035	0.684542	0.985186	1.07394	0.961746	1.04358	1.16402	1.8169	2.33575	2.88188	3.21738	1.00139	1.72511	3.16607	3.45597	3.44084	1.64379	6.16648	7.4391	9.428	9.96407	1.38098	2.6579	2.9261	3.45448	3.90898	0.842089	0.998652	1.57976	1.26575	1.24393	1.00309	1.22028	1.16815	1.75795
Fam117b	0.164797	0.401661	0.506619	0.485172	0.378735	0.338201	0.439773	0.528437	0.412196	0.376192	0.359085	0.422863	0.558474	0.666559	0.514	0.303879	0.472794	0.400112	0.390566	0.302515	0.311307	0.450824	0.475708	0.467215	0.407776	0.243449	0.456182	0.520689	0.50368	0.374311	0.821895	0.66382	0.64107	0.646451	0.570066	0.252726	0.55277	0.512451	0.487631	0.431412	0.269903	0.440947	0.428184	0.381207	0.289875	0.327825	0.457832	0.433914	0.510882
Ica1l	0.047144	0	0.0117945	0.015859	0.0304031	0.00149105	0.0056812	0.00291564	0	0.00289546	0.00438921	0.00689832	0.0418874	0.0187842	0.0222091	0.0036884	0.00416077	0	0.00458291	0.00638828	0	0.00873721	0.017552	0.0187186	0.0054086	0.00618374	0.00651153	0.0108612	0.00633598	0.00782513	0	0	0.0372553	0.0685507	0.0781298	0.00679775	0.0259217	0.014123	0.0157861	0.00340018	0.00569566	0	0.00706981	0.0262307	0.00296774	0.00193281	0.00592214	0.00699491	0.00741756
Wdr12	0.220172	0.431378	0.410714	0.375887	0.360153	0.642094	0.754104	0.570972	0.632393	0.602659	0.558391	0.646781	0.581647	0.415163	0.481105	0.564058	0.570695	0.398829	0.437151	0.598241	0.723511	0.813958	0.75766	0.704473	0.617872	0.652005	0.812725	0.722633	0.642895	0.529533	0	0.292107	0.412028	0.258251	0.27857	0.500341	0.896971	0.633723	0.531123	0.54308	0.702321	0.827004	0.679806	0.653041	0.760287	0.763525	0.796947	0.893909	0.70835
Carf	0.113918	0.0560039	0.0440986	0.0875487	0.0776684	0.0866422	0.0799402	0.0670233	0.0961798	0.0677021	0.0634467	0.0834706	0.0253309	0.0699723	0.0646799	0.0981562	0.0748697	0.093559	0.0655115	0.0974236	0.0737043	0.0443763	0.0488354	0.0589492	0.0542585	0.124079	0.0495511	0.049219	0.0790584	0.0894253	0	0.315628	0.0408047	0.0608591	0.0494716	0.0945913	0.0577879	0.0241392	0.057763	0.0557745	0.0784511	0.0541405	0.0626874	0.111974	0.106501	0.0620939	0.0773317	0.0577011	0.0473258
Nbeal1	0.706893	0.78897	0.592536	0.788439	0.780247	0.516305	0.495377	0.545511	0.597543	0.558849	0.531517	0.587314	0.481316	0.590364	0.643278	0.576093	0.548932	0.529029	0.731748	0.79402	0.435781	0.347055	0.311394	0.415792	0.412539	0.477564	0.347346	0.436811	0.459694	0.465592	0	0.813389	0.848622	0.99152	1.12187	0.613757	0.330903	0.295873	0.428595	0.393162	0.477555	0.496347	0.564752	0.644869	0.522127	0.456069	0.40509	0.384864	0.457485
Cyp20a1	0.235226	0.245359	0.160727	0.166568	0.233342	0.21395	0.170152	0.175874	0.228931	0.148333	0.183075	0.167003	0.163183	0.210147	0.17782	0.206522	0.21687	0.128429	0.175823	0.206503	0.180497	0.170559	0.206529	0.200831	0.214091	0.182048	0.201857	0.159532	0.217567	0.203811	0	0.0935769	0.125363	0.18743	0.142963	0.160617	0.216134	0.225241	0.260938	0.264017	0.205343	0.181166	0.224161	0.305265	0.218218	0.220837	0.250337	0.217333	0.232248
Abi2	0.320541	0.411795	0.294206	0.359288	0.316045	0.307846	0.206278	0.197232	0.29483	0.282497	0.274276	0.227376	0.160014	0.234119	0.222081	0.318767	0.282047	0.347798	0.367976	0.273045	0.328425	0.234661	0.229196	0.249854	0.287216	0.338182	0.27347	0.210429	0.300444	0.261927	0	0.265951	0.235548	0.318901	0.296803	0.252565	0.314754	0.185249	0.247353	0.229652	0.313967	0.265962	0.331508	0.346965	0.309488	0.313928	0.244799	0.203017	0.299454
Raph1	0.323713	0.251227	0.195113	0.214582	0.185416	0.26668	0.256526	0.224824	0.233931	0.342064	0.396651	0.309031	0.218059	0.347975	0.310972	0.274775	0.214816	0.237262	0.329934	0.146816	0.426439	0.464883	0.483276	0.48447	0.657791	0.442322	0.644812	0.504873	0.507537	0.657446	0	0.108652	0.229085	0.330507	0.308842	0.335616	0.594545	0.44841	0.398694	0.578711	0.300094	0.227242	0.394584	0.284695	0.17922	0.289304	0.2455	0.28212	0.376948
Cd28	0	0	0	0	0	0	0	0	0	0	0	0	0	0	0	0	0	0	0	0	0	0	0	0	0.00198554	0	0	0	0	0.00186293	0	0	0	0	0	0	0	0.0014484	0	0	0	0	0	0	0	0	0	0	0
Gm11579	0	0	0	0	0	0	0	0	0	0	0	0	0	0	0	0	0	0	0	0	0	0	0	0	0	0	0	0	0	0	0	0	0	0	0	0	0	0	0	0	0	0	0	0	0	0	0	0	0
2310016D23Rik	0	0	0	0	0	0	0	0	0	0	0	0	0	0	0	0	0	0	0	0	0	0	0	0	0	0	0	0	0	0	0	0	0	0	0	0	0	0	0	0	0	0	0	0	0	0	0	0	0
Ctla4	0	0	0	0.00393111	0	0	0	0	0	0	0	0	0	0	0	0	0	0	0	0	0	0	0	0	0	0	0	0	0	0	0	0	0	0	0	0	0	0	0	0	0	0	0	0	0	0	0	0	0
Icos	0	0	0.000507871	0	0	0	0	0	0	0	0	0	0	0	0	0	0	0	0	0	0	0	0	0	0.000734104	0	0	0	0	0.0055888	0	0	0	0	0	0	0	0	0	0	0	0	0	0	0	0	0	0	0
Gm28083	0	0	0	0	0	0	0	0	0	0	0	0	0	0	0	0	0	0	0	0	0	0	0	0	0	0	0	0	0	0	0	0	0	0	0	0	0	0	0	0	0	0	0	0	0	0	0	0	0
Gm11587	0	0	0	0	0	0	0	0	0	0	0	0	0	0	0	0	0	0	0	0	0	0	0	0	0	0	0	0	0	0	0	0	0	0	0	0	0	0	0	0	0	0	0	0	0	0	0	0	0
9530026F06Rik	0	0	0	0	0	0	0	0	0	0	0	0	0	0	0	0	0	0	0	0	0	0	0	0	0	0	0	0	0	0	0	0	0	0	0	0	0	0	0	0	0	0	0	0	0	0	0	0	0
Gm11588	0	0	0	0	0	0	0	0	0	0	0	0	0	0	0	0	0	0	0	0	0	0	0	0	0	0	0	0	0	0	0	0	0	0	0	0	0	0	0	0	0	0	0	0	0	0	0	0	0
Gm28449	0	0	0	0	0	0	0	0	0	0	0	0	0	0	0	0	0	0	0	0	0	0	0	0	0	0	0	0	0	0	0	0	0	0	0	0	0	0	0	0	0	0	0	0	0	0	0	0	0
4930587A21Rik	0	0	0	0	0	0	0	0	0	0	0	0	0	0	0	0	0	0	0	0	0	0	0	0	0	0	0	0	0	0	0	0	0	0	0	0	0	0	0	0	0	0	0	0	0	0	0	0	0
Pard3b	0.244274	0.296914	0.142014	0.153888	0.123944	0.084834	0.156365	0.206754	0.120914	0.09079	0.0477083	0.153701	0.094456	0.0872822	0.0571365	0.0712625	0.181772	0.390376	0.12906	0.19447	0.0927852	0.0714917	0.0708907	0.062475	0.0543471	0.0769825	0.0958804	0.0796753	0.0523401	0.0607821	0	0.190493	0.132434	0.167839	0.0935963	0.0298762	0.0536202	0.0452406	0.0211213	0.0371659	0.0789001	0.158528	0.218052	0.123891	0.145727	0.0811307	0.122958	0.171698	0.121652
Pard3bos1	0	0.0139608	0	0.00236045	0.00414159	0.00372534	0.00232262	0.00375872	0	0.00269305	0.00243629	0.00276904	0.00192103	0	0.00261226	0.00105725	0.0055925	0.0179471	0	0.0689886	0	0.00201895	0.00796549	0	0.00207811	0.00664767	0.00433546	0.000945569	0	0.0065415	0	0.0576568	0.00139205	0	0	0	0	0	0	0.00323858	0.00510344	0.00538695	0.014878	0	0.00596112	0.00500454	0.00439983	0.0137996	0
Pard3bos2	0	0	0	0	0	0	0	0	0	0	0	0	0	0	0	0	0	0	0	0	0	0	0	0	0	0	0	0	0	0	0	0	0	0	0	0	0	0	0	0	0	0	0	0	0	0	0	0	0
Pard3bos3	0	0	0	0	0	0	0	0	0	0	0	0	0	0.00176973	0	0	0	0	0	0	0	0	0	0	0	0	0	0	0	0	0	0	0	0	0	0	0	0	0	0	0	0	0	0	0	0	0	0	0
Gm29084	0	0	0	0	0	0	0	0	0	0	0	0	0.00128962	0	0	0	0	0	0	0	0	0	0	0	0	0	0	0	0	0	0	0	0	0	0	0	0	0	0	0	0	0	0	0	0	0	0	0	0
Nrp2	0	0.0714004	0.119832	0.147481	0.190768	0.0157779	0.0291192	0.0431834	0.0532124	0.0342431	0.0065545	0.0222909	0.0338932	0.0301844	0.0501102	0.00795948	0.0127244	0.0575791	0.0554698	0.0360526	0.0218383	0.0184414	0.00824859	0.0317	0.0290877	0.00711575	0.0294281	0.038629	0.0456874	0.0328168	0	0.0961686	0.0442341	0.0769906	0.0572318	0.00875671	0.00492737	0.00893184	0.00176949	0.0223762	0.0351069	0.0183224	0	0.0908142	0.0303758	0.0230648	0.0142017	0.0167499	0.0191065
Gm29083	0	0	0	0	0	0	0	0	0	0	0	0	0	0	0	0	0	0	0	0	0	0	0	0	0	0	0	0	0	0	0	0	0	0	0	0	0	0	0	0	0	0	0	0	0	0	0	0	0
Gm4208	0	0	0	0	0	0	0	0	0	0	0	0	0	0	0	0	0	0	0.00523522	0	0	0	0	0	0	0	0	0	0	0	0	0	0	0	0	0	0	0	0	0	0	0	0	0	0	0	0	0	0
Ino80d	0.53319	0.686643	0.436649	0.461639	0.479386	0.394375	0.46343	0.444785	0.412921	0.412704	0.392596	0.587126	0.437926	0.375094	0.413389	0.448755	0.540594	0.654369	0.551426	0.428328	0.332669	0.392828	0.37576	0.322297	0.328756	0.428422	0.482809	0.460658	0.388327	0.446971	0	0.893155	0.534188	0.574401	0.565504	0.275587	0.398725	0.351715	0.38407	0.285419	0.439961	0.452315	0.519221	0.378482	0.33285	0.357655	0.467344	0.454798	0.322401
Ino80dos	0.0242073	0.026426	0.0161753	0.0381287	0.0271348	0.034232	0.022127	0.0322574	0.0208725	0.0295772	0.0390385	0.00904902	0.0114161	0.0180108	0.0270568	0.032111	0.0221116	0.0311828	0.068147	0.0559087	0.0282716	0.0153499	0.0190833	0.0234715	0.0197109	0.0282061	0.0186162	0.0188699	0.0171151	0.0220077	0	0	0.0162055	0.0301302	0.0456105	0.0236319	0.0159214	0.0201044	0.0164606	0.0181132	0.0226227	0.011934	0.0117051	0.0209311	0.0330113	0.0274739	0.0183722	0.0267097	0.041787
Gm20342	0.149127	0.189335	0.0778244	0.123891	0.138406	0.172128	0.0878719	0.116749	0.130281	0.159419	0.221244	0.0545276	0.080923	0.114391	0.0917094	0.177691	0.0860689	0.186271	0.209624	0.128024	0.139965	0.0864423	0.112104	0.109517	0.103522	0.153571	0.160206	0.140133	0.137981	0.14524	0	0	0.0992651	0.154061	0.185253	0.175188	0.0658095	0.0830977	0.0994555	0.127583	0.209031	0.119559	0.110731	0.145757	0.148506	0.173883	0.121773	0.0793375	0.087386
Ndufs1	0.598564	0.460769	0.39502	0.510022	0.458985	0.551884	0.488725	0.440389	0.521246	0.628648	0.485058	0.417449	0.362272	0.406859	0.498719	0.554811	0.43212	0.455177	0.607417	0.605667	0.561171	0.600553	0.538734	0.599451	0.632297	0.701631	0.618332	0.586611	0.709059	0.681479	0	0.240427	0.308328	0.417211	0.36862	0.607446	0.523641	0.537329	0.527812	0.619433	0.569886	0.500534	0.565431	0.605644	0.551492	0.645879	0.500763	0.51528	0.523916
Eef1b2	10.8164	13.711	16.7382	15.0777	14.3125	14.7868	17.5534	17.2636	20.0884	19.4613	15.0178	17.9317	18.6741	19.0472	17.7798	13.6829	15.7622	15.0325	17.8535	16.7992	17.0354	17.6068	17.2905	19.3692	17.6765	12.9581	14.5214	16.7122	16.9397	15.8505	9.86274	13.3934	17.7262	16.9575	15.1748	16.0676	15.3034	17.8294	18.5882	17.0984	14.6996	16.8204	16.4791	19.1853	19.0896	15.5851	18.4329	17.129	20.4153
Gpr1	0	0	0	0	0.00213075	0	0	0	0	0	0	0	0	0	0	0	0	0	0	0	0	0.00142445	0	0	0	0	0	0	0	0	0	0	0	0	0	0	0	0	0	0	0	0	0	0	0	0	0	0	0
Gm11608	0	0	0	0	0	0	0	0	0	0	0	0	0	0	0	0	0	0	0	0	0	0	0	0	0	0	0	0	0	0	0	0	0	0	0	0	0	0	0	0	0	0	0	0	0	0	0	0	0
Zdbf2	0.494519	0.276722	0.185774	0.227569	0.0705796	0.354623	0.250875	0.216967	0.0873576	0.0579904	0.363365	0.26991	0.111582	0.211106	0.0269828	0.247411	0.250073	0.292909	0.156937	0.0366743	0.242806	0.195614	0.10521	0.0920012	0.0193754	0.506311	0.262713	0.192468	0.192216	0.0312164	0	0.210289	0.18542	0.157399	0.0363119	0.271542	0.181908	0.0986315	0.180318	0.0178863	0.348187	0.150368	0.173837	0.126508	0.00293243	0.351605	0.153854	0.118239	0.16365
Adam23	0.0111887	0	0.00600845	0.0174587	0.0224245	0.0781006	0.00313156	0.00541536	0.00262747	0.00440763	0.0540446	0.000955601	0.00840648	0.0210891	0.0267781	0.0570687	0	0	0.0104622	0.00598254	0.0805943	0.00862816	0.00537628	0.025832	0.0135415	0.107022	0.0253687	0.00640999	0.0266505	0.0233162	0	0	0.00699356	0.00956013	0.0303422	0.102655	0.00408709	0.00768817	0.0252908	0.0351538	0.0754124	0.00772077	0	0	0.0105776	0.0434727	0.00201003	0	0
Gm39653	0	0	0	0	0	0.00115186	0	0	0	0	0	0	0	0	0	0	0	0	0	0	0	0	0	0	0	0	0	0	0	0	0	0	0	0	0	0	0	0	0	0	0	0	0	0	0	0	0	0	0
Dytn	0	0	0	0	0	0	0	0	0	0	0	0	0	0	0	0	0	0	0	0	0	0	0	0	0	0	0	0	0	0	0	0	0	0	0.00368823	0	0	0	0	0	0	0	0	0	0	0	0	0	0
Mdh1b	0	0	0	0	0	0	0	0	0	0	0	0.00206451	0	0	0.00236446	0	0	0	0	0	0	0.00441621	0.00233	0	0.00357582	0	0	0	0	0	0	0	0	0	0	0.00851784	0	0.00226751	0.00165681	0	0.00173404	0	0	0.0111079	0	0	0.00245635	0.00246806	0
Fastkd2	0.270592	0.133183	0.197936	0.18193	0.238909	0.268162	0.28854	0.309473	0.248867	0.279452	0.246613	0.225726	0.200504	0.202496	0.196477	0.219091	0.251201	0.262152	0.254802	0.216285	0.277866	0.308213	0.311381	0.263321	0.256264	0.317115	0.242883	0.256401	0.262888	0.274758	0	0.33731	0.202926	0.163468	0.165564	0.248491	0.283284	0.262655	0.227787	0.279117	0.272588	0.240529	0.282449	0.352863	0.287798	0.275493	0.279824	0.313313	0.257155
4933402D24Rik	0	0	0	0	0	0	0	0	0	0	0	0	0	0	0	0	0	0	0	0	0	0	0	0	0	0	0	0	0	0	0	0	0	0	0	0	0	0	0	0	0.00100796	0	0	0	0	0	0.00209653	0	0
Gm13749	0	0	0	0	0	0.000926717	0	0	0	0	0	0	0	0	0	0.000940542	0	0.00936807	0	0	0.00172839	0	0	0	0	0	0.00275646	0	0	0	0	0	0	0	0	0	0	0	0	0	0.00281868	0	0	0	0	0	0	0	0
Klf7	0.611043	0.970173	0.553045	0.662538	0.701238	0.169205	0.274161	0.294853	0.26426	0.233342	0.277691	0.352024	0.485284	0.494803	0.446324	0.190594	0.307906	0.566334	0.243493	0.309131	0.12471	0.175424	0.185077	0.199454	0.176301	0.21088	0.254007	0.361091	0.290074	0.292581	1.64379	0.525253	0.787694	1.12208	1.04442	0.293957	0.11116	0.301596	0.286136	0.302316	0.179329	0.16416	0.216419	0.24849	0.17622	0.14882	0.187224	0.170383	0.138743
Gm26649	0	0.0376206	0.00352884	0.00948298	0.00951319	0.00241114	0.0126886	0.00550272	0.00385495	0.0017232	0.00408341	0.00462473	0.0126368	0.00664061	0.00347002	0	0	0.0103294	0.0175307	0	0	0.0105964	0.00248104	0	0	0.00580894	0.00603533	0.00175262	0.00305524	0.00221254	0	0	0.0123678	0.0018453	0.00819018	0	0.0037548	0.00362087	0	0.00150778	0	0.00436312	0.0133924	0.00583963	0	0	0.00146147	0	0.0147126
Gm13748	0	0	0	0	0	0	0	0	0	0	0	0	0	0	0	0	0	0	0	0	0	0	0	0	0	0	0	0	0	0	0	0	0	0	0	0	0	0	0	0	0	0	0	0.00471288	0	0	0	0	0
Gm28981	0	0	0	0	0	0	0	0	0	0	0	0	0	0	0	0	0	0	0	0	0	0	0	0	0	0	0	0	0	0.000912099	0	0	0	0	0	0	0	0	0	0	0	0	0	0	0	0	0	0	0
Creb1	0.486626	0.402873	0.474206	0.498857	0.525537	0.519953	0.474465	0.442046	0.525849	0.513992	0.543414	0.453544	0.425742	0.488868	0.576302	0.524235	0.484012	0.372754	0.614305	0.627464	0.395182	0.345104	0.427192	0.36016	0.382047	0.622821	0.479462	0.481827	0.464781	0.553525	0.821895	0.655785	0.542385	0.617933	0.612532	0.522238	0.465738	0.363731	0.37915	0.430846	0.484278	0.514962	0.45035	0.528274	0.518165	0.403157	0.457572	0.413156	0.470186
Mettl21a	0.00997944	0.0345776	0.0733047	0.0756367	0.0925094	0.0528002	0.0455355	0.0627992	0.0684467	0.0780519	0.098046	0.0442555	0.0672671	0.0618646	0.0744977	0.0644803	0.029262	0.0478454	0.0632319	0.071072	0.0710505	0.0474456	0.0823867	0.0929141	0.0863343	0.0507564	0.0662775	0.0526358	0.0685881	0.0819984	0	0.0535424	0.0532234	0.0678086	0.0845726	0.067721	0.0389025	0.0854485	0.0853613	0.111387	0.0773532	0.0288312	0.114238	0.0333499	0.0841138	0.0692896	0.0530977	0.0192664	0.0724038
Gm28982	0	0	0	0	0	0	0	0	0	0	0	0	0	0	0	0	0	0	0	0	0	0	0	0	0	0	0	0	0	0	0	0	0	0	0	0	0	0	0	0	0	0	0	0	0	0	0	0	0
Gm29152	0	0	0	0	0	0	0	0	0	0	0	0	0	0	0	0	0	0	0	0	0	0	0	0	0	0	0	0	0	0	0	0	0	0	0	0	0	0	0	0	0	0	0	0	0	0	0	0	0
Ccnyl1	0.0919239	0.0451534	0.0651616	0.0534663	0.0738497	0.0678416	0.0380721	0.050291	0.0437632	0.0732347	0.100889	0.0656424	0.0518846	0.0784083	0.0915024	0.0787567	0.069782	0.0559163	0.0503511	0.0475155	0.0642526	0.07046	0.0647223	0.0494641	0.107703	0.119884	0.098155	0.0685282	0.0798062	0.101391	0	0.0535424	0.0721926	0.100797	0.11418	0.0753647	0.0755391	0.0479378	0.0395831	0.0783995	0.0752874	0.0754739	0.00655622	0.0397573	0.0557984	0.0908249	0.0503869	0.0787422	0.0776412
Fzd5	0.168269	0.0994824	0.0799634	0.155239	0.124535	0.0799838	0.0780716	0.0727363	0.0883575	0.0837646	0.0693367	0.101604	0.0713889	0.180679	0.083696	0.0822286	0.0632493	0.0795352	0.150398	0.0735032	0.055395	0.0446895	0.05361	0.087172	0.0490163	0.128876	0.0726586	0.103284	0.12056	0.0740563	0	0.303218	0.119832	0.182081	0.235147	0.0850413	0.0644604	0.0665568	0.0927056	0.058633	0.052506	0.0498279	0.0677868	0.0491929	0.0324474	0.0623097	0.0506593	0.0346793	0.0654973
Plekhm3	0.187353	0.0387723	0.0595843	0.0827706	0.109789	0.0612449	0.0480413	0.050669	0.0567352	0.054345	0.0857331	0.0576411	0.0570414	0.0675748	0.0776288	0.0534339	0.0578023	0.0795868	0.066875	0.0758312	0.0497545	0.0556254	0.0589402	0.0771516	0.0861326	0.103354	0.0760878	0.0549423	0.0804477	0.0764071	0	0	0.0858512	0.137525	0.125406	0.117152	0.0382703	0.0621197	0.063519	0.0975432	0.0589916	0.0575792	0.031407	0.0371366	0.0656275	0.0717744	0.0260336	0.0315576	0.0504414
Akr1cl	20.7698	25.9761	29.8182	27.5228	24.3695	21.7427	24.2981	28.7652	25.2716	22.0548	28.3786	32.3746	34.9176	30.5173	26.847	18.8267	19.8162	20.1782	17.4153	18.1493	19.9058	26.39	34.3468	26.7075	24.0244	16.7663	21.5083	32.5246	24.3683	24.0542	53.4232	22.4645	16.9534	17.427	17.2372	27.5226	31.3963	43.3101	36.2531	31.2359	20.1255	21.9821	23.6733	19.4543	18.8548	17.5077	19.6314	22.1022	20.8544
Cryge	0	0	0.000807049	0.00136757	0.00165103	0.00616401	0.00491005	0.00273917	0.00385927	0.00476732	0	0.00715534	0.00355886	0.00154016	0.00943174	0.00469621	0	0.0101303	0.00596093	0.00325712	0.00363466	0.00152885	0.00917209	0.00764927	0.00254462	0.00535542	0.00188884	0.0115324	0.00652575	0.010928	0	0	0.00158171	0.00422668	0.00141594	0	0	0.0217907	0.0299961	0.016215	0.00773462	0	0	0	0	0.00340538	0	0	0.00705082
Crygd	0	0	0	0	0	0	0	0	0	0	0	0	0	0	0	0	0	0	0	0	0.00164672	0	0	0	0	0	0	0	0	0	0	0	0	0	0	0	0	0	0	0	0	0	0	0	0	0	0	0	0
Crygc	0	0	0.00067189	0	0.000827874	0.00179679	0.00588231	0	0	0	0.00285712	0.00222498	0	0	0	0.0164318	0.00262416	0	0	0.00313104	0.00598815	0.00131785	0	0.00190227	0	0.00211349	0.00327938	0.00157178	0.000841997	0.00226174	0	0	0.00127634	0	0	0	0	0	0	0	0.0108186	0.0052867	0	0	0	0.0123232	0.00210984	0	0
Crygb	0	0	0	0	0	0.00216764	0	0	0	0	0	0	0	0	0	0.00121336	0	0	0	0	0.00158469	0	0	0	0	0.0020417	0	0	0	0	0	0	0	0	0	0	0	0	0	0	0	0	0	0	0	0	0	0	0
Cryga	0	0	0	0	0.000807118	0	0	0	0	0	0	0	0	0	0	0	0	0	0	0	0	0	0	0	0	0	0	0	0	0.00104675	0	0	0	0	0	0	0	0	0	0	0	0	0	0	0	0	0	0	0
Gm28845	0	0	0	0	0	0	0	0	0	0	0	0	0	0	0	0	0	0	0	0	0	0	0	0	0	0	0	0	0	0	0	0	0	0	0	0	0	0	0	0	0	0	0	0	0	0	0	0	0
D630023F18Rik	0	0	0	0.00102491	0	0	0	0	0	0	0	0	0	0	0	0.00149931	0	0	0	0	0.00180527	0	0	0	0.00668135	0.00440012	0	0	0.00153921	0	0	0	0	0	0	0	0	0	0	0	0	0.00333864	0	0	0	0	0	0	0
Idh1	1.58193	0.978046	0.833767	1.23393	1.11434	1.50818	0.796407	0.553719	0.756256	0.52401	1.254	0.630762	0.462541	0.694405	0.610989	1.91315	0.992038	1.12937	1.10842	1.06311	0.919291	0.547544	0.576725	0.699463	0.681874	1.33863	0.605812	0.499093	0.720902	0.661807	2.46569	0.810681	0.728703	0.991437	0.98443	1.32013	0.761175	0.590918	0.937119	0.835381	1.67927	1.08231	0.899672	1.03384	0.90055	1.3565	0.742627	0.682004	0.80065
Pikfyve	0.157163	0.180136	0.235587	0.329846	0.320872	0.213117	0.211479	0.199579	0.243583	0.251057	0.217815	0.119318	0.165714	0.28344	0.234538	0.213126	0.213396	0.18189	0.161901	0.27517	0.266518	0.181702	0.144486	0.15522	0.214	0.218326	0.163114	0.159756	0.21449	0.209228	0.821895	0.152164	0.282212	0.412034	0.379891	0.16029	0.136417	0.144974	0.190947	0.200676	0.267568	0.251227	0.242432	0.356023	0.213209	0.268131	0.175521	0.187154	0.196641
Pth2r	0	0	0	0	0	0	0	0	0	0	0	0	0	0	0	0	0	0	0	0	0	0	0	0.00218871	0	0	0	0	0	0	0	0	0	0	0	0	0	0	0	0	0	0	0	0	0	0	0	0	0
Crygf	0	0	0	0	0	0	0	0	0	0	0	0	0	0	0	0	0	0	0	0	0	0	0	0	0	0	0	0	0	0	0	0	0	0	0	0	0	0	0	0	0	0	0	0	0	0	0	0	0
Map2	0.128333	0.0582006	0.064155	0.0653511	0.0846609	0.0450307	0.0442241	0.0464381	0.0493133	0.0509475	0.106544	0.0955381	0.135527	0.148019	0.166766	0.0208585	0.0161166	0.0339176	0.00931025	0.0279135	0.0559014	0.0586773	0.0718688	0.0654286	0.0504576	0.0355706	0.0370486	0.0875188	0.0923487	0.09625	0	0	0.35919	0.477741	0.426043	0.0356223	0.065877	0.0638838	0.053013	0.0874397	0.015108	0.0101874	0.0483109	0.0284942	0	0.0268166	0.0476379	0.0643973	0.0307111
Gm10558	0	0	0	0.00149151	0	0	0	0	0	0	0	0	0	0	0.0022078	0	0.00113101	0	0	0	0	0	0	0	0	0	0	0	0	0	0	0	0	0	0.00230479	0	0	0	0	0	0	0	0	0	0	0	0	0	0
Unc80	0	0	0	0	0	0.00097579	0	0.00338515	0	0	0.00394943	0	0	0	0	0	0.00179575	0	0	0	0.00153125	0	0	0	0	0	0	0	0	0	0	0	0	0	0.00139382	0	0	0	0	0	0	0	0	0	0	0	0	0	0.0160703
Rpe	0.181643	0.104704	0.124827	0.224249	0.182723	0.186952	0.104336	0.0898822	0.235705	0.192069	0.226288	0.163481	0.101882	0.213066	0.254661	0.204072	0.126378	0.142333	0.214877	0.142977	0.164645	0.119532	0.105628	0.166328	0.191921	0.149384	0.0660925	0.0982287	0.209547	0.18279	0	0	0.110799	0.257101	0.244302	0.323981	0.149403	0.0971136	0.21059	0.171357	0.177699	0.110967	0.0652332	0.250233	0.216514	0.142031	0.111699	0.138917	0.174942
Kansl1l	0.387114	0.281623	0.190944	0.37008	0.301366	0.369648	0.26854	0.211355	0.2687	0.267582	0.403062	0.209236	0.230528	0.301342	0.231607	0.458295	0.340332	0.349313	0.425914	0.386838	0.318586	0.188769	0.17464	0.203512	0.182122	0.405139	0.239841	0.261215	0.359468	0.320472	0.821895	0.428375	0.243082	0.394064	0.40693	0.275843	0.202219	0.179655	0.265527	0.166928	0.383238	0.274216	0.258599	0.466414	0.298081	0.304952	0.207869	0.234393	0.313614
Acadl	1.26106	1.18195	1.26338	1.48451	1.13462	1.24784	1.0714	1.21068	1.34372	1.27588	0.981479	0.871176	0.907324	1.05121	0.975825	1.24143	1.14657	1.2651	1.40081	1.3661	1.33705	1.18417	1.17281	1.28035	1.07113	1.60747	1.16522	1.17539	1.46099	1.29865	0	0.786776	1.2044	1.2636	1.20538	0.971776	0.924706	1.01321	1.14115	1.0411	1.22467	1.23583	1.21788	1.55615	1.36379	1.40495	1.28699	1.46383	1.59612
Myl1	0.017066	0	0.00333417	0.0121551	0.0112819	0	0.00415978	0.00211325	0.00793097	0.00437153	0	0.00271403	0.00423464	0.00319368	0	0.00410003	0.00164658	0.0147227	0.00592655	0.00560035	0.00417143	0	0.000469114	0.00516015	0.0014776	0.00225468	0	0.00503523	0.00897588	0.00612272	0	0	0.00112368	0	0	0	0	0.00123669	0	0.0017677	0.00311843	0.00671438	0.0149772	0.0200283	0.0094551	0.00555506	0.00225054	0.00916438	0
Lancl1	0.275616	0.38411	0.536287	0.521913	0.450991	0.389036	0.397303	0.483805	0.352378	0.379212	0.405959	0.487539	0.567927	0.422739	0.348331	0.33563	0.444005	0.494788	0.490321	0.488986	0.349412	0.380435	0.420891	0.328345	0.287171	0.344994	0.416632	0.515832	0.423257	0.383818	0	0.42424	0.615653	0.565581	0.474871	0.352444	0.384553	0.558885	0.43222	0.351971	0.311457	0.394549	0.41431	0.406081	0.334488	0.317684	0.407751	0.400534	0.427243
Cps1	0	0	0.00078905	0.00152013	0.00418532	0.000801724	0	0	0	0	0	0	0	0	0	0	0	0	0	0	0.00164672	0	0	0	0.000368475	0	0	0	0	0	0	0	0.00734981	0	0.00414427	0	0	0	0	0	0	0	0	0	0	0	0	0	0
Gm15668	0	0	0	0	0	0	0	0	0	0	0	0	0	0	0	0	0	0	0	0	0	0	0	0	0	0	0	0	0	0	0	0	0	0	0	0	0	0	0	0	0	0	0	0	0	0	0	0	0
Gm15669	0	0	0	0	0	0	0	0	0	0	0	0	0	0	0	0	0	0	0	0	0	0	0	0	0	0	0	0	0	0	0	0	0	0	0	0	0	0	0	0	0	0	0	0	0	0	0	0	0
Gm15671	0	0	0	0	0	0	0	0	0	0	0	0	0	0	0	0	0	0	0	0	0	0	0	0	0	0	0	0	0	0	0	0	0	0	0	0	0	0	0	0	0	0	0	0	0	0	0	0	0
Erbb4	0	0	0.00364651	0.00277857	0.00591602	0	0	0	0	0.00281874	0	0.00484077	0.00654972	0	0	0	0	0	0	0	0.0102308	0.00155825	0	0.00419095	0	0	0	0.00133315	0.00139108	0	0	0	0.00843465	0.00227182	0.00384753	0	0	0.0016547	0.00396448	0.00172608	0	0.00163783	0	0	0	0	0.00398662	0.00667064	0
Gm28497	0	0	0	0	0	0	0	0	0	0	0	0	0	0	0	0	0	0	0	0	0	0	0	0	0	0	0	0	0	0	0	0	0	0	0	0	0	0	0	0	0	0	0	0	0	0	0	0	0
Gm29113	0	0	0	0.000742115	0	0	0	0	0	0	0	0	0	0.00179882	0	0.00145694	0	0	0	0	0	0	0	0	0.00110524	0	0	0	0	0	0	0	0	0	0.00316818	0	0	0	0	0	0	0	0	0	0	0	0	0	0
Gm29114	0	0	0	0	0.000926298	0	0	0	0	0	0	0	0	0	0	0	0	0	0	0	0	0	0	0	0.000607603	0	0	0	0	0	0	0	0	0	0	0	0	0	0	0	0	0	0	0	0	0	0	0	0
Ikzf2	0.158099	0.120973	0.139208	0.261197	0.187881	0.130979	0.0903954	0.122047	0.159818	0.163433	0.0796351	0.0654585	0.075648	0.133335	0.124971	0.17415	0.160604	0.191323	0.348303	0.25094	0.0857807	0.0294109	0.0704772	0.10821	0.0863641	0.0777433	0.0256529	0.0591067	0.0874236	0.0791347	0.821895	0.066306	0.0905853	0.222609	0.206008	0.0814622	0.0841185	0.0526213	0.100138	0.0752642	0.158185	0.156836	0.144017	0.13993	0.22352	0.109513	0.0723446	0.0727996	0.119149
Spag16	0	0	0.00146885	0.000995219	0.000846479	0.00223721	0.00348332	0.00799377	0.00766091	0.00264474	0	0.00313139	0.00180163	0.00456221	0.00147362	0.000940542	0.0026119	0	0	0.00286212	0.0100987	0	0.0100099	0.00514487	0.00630076	0	0	0	0.00226052	0	0	0	0	0.00464742	0.00155043	0	0	0.00373645	0.00165681	0.00823445	0.0016519	0.0048935	0.00717151	0	0.0034859	0.00246706	0.00222349	0	0
Vwc2l	0	0	0	0	0	0	0	0	0	0	0	0	0	0	0	0	0	0	0	0	0	0	0	0	0	0	0	0	0	0	0	0	0	0	0	0	0	0	0	0	0	0	0	0	0	0	0	0	0
Bard1	0	0.0129123	0.00183771	0.00591649	0.00728928	0.00957578	0.00107426	0.00551379	0	0.0125868	0	0.00685495	0.00474801	0.0083139	0.00297675	0.0022394	0.00350462	0.0103062	0	0.00824102	0.137562	0.106885	0.0923869	0.143753	0.119593	0.195712	0.159624	0.12857	0.205407	0.186897	0	0	0.00177103	0	0.0132212	0.0106888	0	0.00633525	0.0124262	0.0113853	0.00969816	0	0	0.0105572	0.00277471	0.0219777	0.0436342	0.0720262	0.00682111
Abca12	0	0	0	0	0	0	0	0	0	0.000931326	0	0	0	0	0	0	0	0	0	0.003778	0	0	0.00135391	0.00373815	0	0	0	0	0	0	0	0	0	0	0	0	0	0	0	0	0	0	0	0	0	0.00153267	0	0	0
Atic	0.492567	0.466525	0.604787	0.53068	0.639801	0.666475	0.800517	0.789592	0.676973	0.769576	0.570526	0.817112	0.733374	0.631105	0.705726	0.49696	0.6152	0.414882	0.440465	0.574009	0.841094	1.02068	0.827044	0.825216	0.739561	0.563362	0.712249	0.621295	0.538172	0.495714	1.64379	0.887473	0.691338	0.537689	0.572885	0.755208	0.856898	0.670097	0.685595	0.609638	0.660486	0.752451	0.594439	0.744126	0.697004	0.900893	0.895995	0.969368	0.910006
Fn1	0.0675244	0.0315168	0.128766	0.376185	0.217955	0.0120896	0.0139784	0.00726148	0.0183746	0.0185009	0.0945047	0.0089349	0.0393789	0.0650748	0.0798378	0.0332987	0.0106303	0.0399566	0.0142658	0.00277873	0.021333	0.00464604	0.0273758	0.018574	0.0319067	0.0498357	0.0434958	0.0208439	0.0699965	0.0374894	0	0.0522488	0.156418	0.211925	0.308999	0.0106888	0	0.013271	0.0226054	0.0170697	0.0121814	0.0105757	0	0.00471288	0.0242465	0.0108673	0.00764491	0.0229219	0
Apol7d	0	0	0.00416799	0.0066614	0.00495376	0	0	0	0	0	0	0	0.00100819	0.00734741	0	0	0	0	0	0	0.00217207	0	0	0	0.00104403	0	0.00153915	0.00209491	0.00141213	0.00131503	0	0	0.0131537	0.0387375	0.00847079	0	0.0247144	0.00160448	0.00226679	0	0	0	0	0	0	0.00180183	0	0	0
Gm8883	0	0	0	0	0	0	0	0	0	0	0	0	0	0	0	0	0	0	0	0	0	0	0	0	0	0	0	0	0	0	0	0	0	0	0	0	0	0	0	0	0	0	0	0	0	0	0	0	0
Gm28818	0	0	0	0	0.0011613	0	0	0	0	0	0	0	0	0	0	0.00128737	0	0	0	0	0.0028753	0	0	0	0	0	0	0	0	0	0	0	0	0.00462983	0	0	0	0	0	0	0	0	0	0	0	0	0	0	0
4933417E11Rik	0	0	0.000867258	0	0.00125029	0	0	0	0	0	0	0	0	0	0.00189321	0	0	0	0	0	0	0	0	0	0	0	0	0	0	0	0	0	0	0	0	0	0	0	0	0	0	0	0	0	0	0	0	0	0
4930556G22Rik	0	0	0	0	0	0	0	0	0	0	0	0	0	0	0	0	0	0	0	0	0	0	0	0	0	0	0	0	0	0	0	0	0	0	0	0	0	0	0	0	0	0	0	0	0	0	0	0	0
Gm4319	0	0	0.000918966	0.00138734	0.00290052	0	0	0	0	0	0	0	0	0	0.00422487	0	0	0	0	0	0	0	0	0	0	0	0	0	0	0	0	0	0.0012704	0	0	0	0	0	0	0	0	0	0	0	0	0	0	0	0
Mreg	0	0	0.0485086	0.0775917	0.0525218	0.0010999	0	0.00313206	0	0.00113486	0.00246333	0.0180464	0.0203878	0.0495125	0.0385716	0.00234778	0	0	0	0	0.0085715	0.00576626	0.00167657	0.00692505	0.00622022	0	0	0.00707905	0.013466	0.00952422	0	0	0.0353761	0.0992262	0.0625654	0	0	0.00876778	0.0227334	0.0228268	0	0	0	0	0.00343634	0	0	0	0.00349444
D230017M19Rik	0.0141028	0.0226858	0.025653	0.0428984	0.049245	0.0259316	0.0393563	0.0281701	0.0410246	0.0258788	0.0176814	0.0175081	0.0148958	0.0275195	0.0281023	0.043715	0.0275323	0.0218685	0.0448581	0.0557759	0.022882	0.0257584	0.0168272	0.0141089	0.0397732	0.00535202	0.0170505	0.0080983	0.0133291	0.00997223	0	0	0.0267445	0.018946	0.0434973	0.0226428	0.00483902	0.0236992	0.017114	0.00687703	0.0309373	0.0271661	0.0260582	0.0583453	0.0242482	0.0304173	0.0302157	0.00584175	0.0138071
Pecr	0.229807	0.226323	0.144571	0.153257	0.160053	0.21723	0.265229	0.217456	0.300912	0.246581	0.185244	0.213495	0.244926	0.22575	0.224337	0.188616	0.17349	0.157581	0.116131	0.161388	0.23997	0.342246	0.335615	0.288329	0.267545	0.110869	0.160994	0.171101	0.145919	0.128974	0	0.174958	0.150386	0.1961	0.156575	0.247887	0.297628	0.31104	0.340965	0.301052	0.208363	0.219373	0.137409	0.176138	0.327572	0.231426	0.314385	0.291388	0.256949
Tmem169	0	0	0	0	0	0	0	0	0	0	0	0	0	0	0	0	0	0	0.00450175	0	0.0019255	0	0	0	0	0	0.00144774	0	0	0	0	0	0.00130178	0	0	0	0	0	0	0	0	0	0	0	0	0	0	0	0
Xrcc5	0.253782	0.286501	0.379148	0.407186	0.369179	0.435085	0.41593	0.353321	0.398955	0.384866	0.469198	0.281905	0.326899	0.318792	0.385014	0.45024	0.440657	0.298028	0.449094	0.426528	0.428634	0.359673	0.346346	0.32835	0.383717	0.395577	0.33944	0.311265	0.384814	0.307023	0	0.264078	0.331325	0.264688	0.212935	0.390579	0.385651	0.284259	0.311788	0.293262	0.512877	0.530738	0.497084	0.578055	0.524959	0.470055	0.4014	0.443629	0.52081
March4	0	0	0	0.00119024	0	0	0	0	0	0	0	0	0	0.00225337	0	0	0	0	0	0	0	0	0	0	0	0	0	0	0	0	0	0	0	0	0	0	0	0	0	0.00272813	0	0	0	0	0	0	0	0	0
Smarcal1	0.154306	0.126469	0.0791288	0.0997459	0.0976769	0.113756	0.112165	0.0688141	0.118806	0.13938	0.15189	0.104059	0.0646785	0.0961569	0.113994	0.115688	0.111821	0.107232	0.110154	0.142272	0.144562	0.114861	0.119046	0.135525	0.184231	0.168744	0.156969	0.114683	0.182871	0.201126	0	0.0522488	0.0481925	0.0425243	0.0861282	0.126687	0.0746407	0.0751029	0.147444	0.163162	0.108644	0.0809566	0.108088	0.118806	0.135011	0.105363	0.107875	0.112619	0.0965107
Gm39662	0	0	0	0.000809745	0	0	0	0	0	0	0	0	0	0	0	0	0	0	0	0	0	0.00219723	0	0	0	0	0	0	0	0	0	0	0	0	0	0	0	0	0	0	0	0	0	0	0	0	0	0	0
Ankar	0	0	0	0	0.000920497	0	0	0	0	0.00192991	0	0	0	0	0	0	0	0	0	0	0	0	0	0	0	0	0	0	0	0	0	0	0	0	0	0	0	0	0	0	0	0	0	0	0.00276286	0	0	0	0
Rpl37a	27.8785	36.1176	36.8905	27.3087	30.6604	31.9494	34.0951	33.752	30.1357	34.155	34.656	39.8441	41.261	33.8756	36.3367	31.2104	32.2903	29.8267	27.3669	30.0841	31.712	33.3839	32.3695	29.4074	30.828	24.9886	28.481	31.431	25.7514	27.7467	31.232	35.4545	40.4035	32.3248	34.6215	33.0175	32.1448	35.5141	31.1462	33.2355	30.5175	31.1983	27.7096	26.1122	31.69	30.3241	31.6815	29.1326	27.9631
Igfbp2	0.677681	0.431916	0.476299	0.702103	0.762791	0.922704	0.513027	0.449009	0.459284	0.459726	0.680271	0.514577	0.3368	0.579807	0.529718	0.940269	0.583451	0.73026	0.806874	0.959652	1.18081	0.729796	0.610185	0.64729	0.537559	0.987675	0.713761	0.500068	0.571794	0.52991	0	0.604074	0.255552	0.379536	0.476	0.805985	0.81455	0.588334	0.718293	0.5796	1.45394	0.603171	0.83705	1.15137	1.14329	1.52883	0.791081	0.727795	0.655072
Igfbp5	16.9822	5.56511	0.230227	1.42818	0.977972	12.9361	3.91489	0.990583	2.38945	2.83258	9.7064	0.621145	0.0384897	0.106116	0.181136	13.4317	7.38234	4.30957	7.95692	9.12649	5.15437	0.892352	0.174492	0.588802	0.758027	5.11935	0.928124	0.114277	0.403832	0.404918	4.10948	0.331129	0.0248802	0.189931	0.0956879	7.74299	0.57792	0.0475492	0.117821	0.202425	7.85624	5.4279	3.0806	4.71652	4.93339	6.32811	3.01935	1.05719	3.57013
1700027A15Rik	0	0	0	0	0	0.00097087	0	0	0	0	0	0	0	0	0	0	0	0	0	0	0	0	0	0	0	0.00313219	0	0	0	0	0	0	0	0	0	0	0	0	0	0	0	0	0	0	0	0	0	0	0
Tnp1	0	0	0	0	0	0	0	0	0	0	0	0	0	0	0	0	0	0	0	0	0	0	0	0	0	0	0	0	0	0	0	0	0	0	0	0	0	0	0	0	0	0	0	0	0	0	0	0	0
Gm29185	0	0	0	0	0	0	0	0	0	0	0	0	0	0	0	0	0	0	0	0	0	0	0	0	0	0	0	0	0	0	0	0	0	0	0	0	0	0	0	0	0	0	0	0	0	0	0	0	0
Pinc	0	0	0	0	0	0	0	0	0	0	0	0	0	0	0	0	0	0	0	0	0	0	0	0	0	0	0	0	0	0	0	0	0	0	0	0	0	0	0	0	0	0	0	0	0	0	0	0	0
D530049I02Rik	0	0	0	0	0	0	0	0	0	0	0	0	0	0	0	0	0	0	0	0	0	0	0	0	0	0	0	0	0	0	0	0	0	0	0	0	0	0	0	0	0	0	0	0	0	0	0	0	0
C530043A13Rik	0	0	0	0	0	0.00108256	0	0	0	0	0	0	0	0	0	0.00146981	0	0	0	0	0	0	0	0.00258393	0	0	0	0	0	0	0	0	0	0	0	0	0	0	0	0	0	0	0	0	0	0	0	0	0
Gm29186	0	0	0	0	0	0	0	0	0	0	0	0	0	0	0	0	0	0	0	0	0	0	0	0	0	0	0	0	0	0	0	0	0	0	0	0	0	0	0	0	0	0	0	0	0	0	0	0	0
6030407O03Rik	0.0938091	0.0399848	0	0.00123464	0	0.104764	0.0614887	0.0308928	0.0162132	0.0407921	0.0599685	0.0445115	0.0107176	0.00344413	0.00839818	0.102326	0.0713043	0.0214389	0.0468753	0.0547439	0.0729835	0.0439427	0.0107774	0.0359122	0.0302534	0.07971	0.055411	0.0135032	0.0221883	0.0349101	0	0	0.00116671	0	0	0.0501951	0.0436287	0.00579201	0.0170677	0.00643398	0.0600157	0.0947944	0.060177	0.0687652	0.100106	0.068797	0.0588309	0.0351701	0.0957826
Gm29183	0	0	0	0	0	0.00158113	0	0	0	0	0	0.00259469	0	0	0	0.00137825	0	0	0	0.00437792	0.00181601	0	0	0	0	0	0	0	0	0	0	0	0	0	0	0	0	0	0	0	0	0	0	0	0	0.00150186	0	0	0.00585694
Tns1	0.262535	0.145115	0.439718	0.376645	0.338817	0.0790836	0.0714462	0.0875775	0.122803	0.094114	0.0549731	0.0543067	0.246152	0.203916	0.179658	0.164941	0.100646	0.146779	0.191426	0.157604	0.0899141	0.0590726	0.198127	0.168579	0.169576	0.106554	0.122587	0.30777	0.212768	0.1986	0	0.0719383	0.146152	0.13374	0.0792186	0.0650707	0.0663724	0.30412	0.299346	0.227598	0.162745	0.154619	0.117623	0.0890349	0.101366	0.115884	0.0853342	0.122949	0.0912907
Rufy4	0	0	0.00839519	0.00374539	0.00162749	0.00103219	0	0	0.003244	0.00421576	0	0	0.00463343	0.00478389	0.0148457	0	0.00337207	0.00376717	0	0.00320118	0.00199563	0.00309686	0.00502187	0.00192559	0.00432633	0	0.002702	0.00961935	0.00469141	0.00437989	0	0	0.00647091	0	0	0	0	0.010385	0.00225047	0.00227492	0.00212088	0	0	0	0.00434045	0.00158449	0.00703986	0	0.00774754
Cxcr2	0	0	0.00476096	0	0.00252043	0.0020223	0	0.00270381	0.013177	0.00205878	0	0	0	0.00181875	0	0.00124576	0	0	0	0.00900625	0	0.00473408	0.0024863	0.00283091	0.00357967	0.00320447	0.00373977	0.00341631	0.00083291	0.00655291	0	0	0	0.0021162	0.00561303	0	0	0.00223152	0.00198577	0.0107593	0	0.00334077	0.00799262	0.00645843	0.0106198	0.00227146	0	0	0
Cxcr1	0	0	0	0	0	0	0	0	0	0	0	0	0	0	0	0	0	0	0	0	0	0	0	0	0	0	0	0	0	0	0	0	0	0	0	0	0	0	0	0	0	0	0	0	0	0	0	0	0
Arpc2	3.45771	2.96748	2.86998	2.95838	3.02301	2.63992	2.85836	2.40649	2.36905	2.21275	2.50249	2.34844	2.12777	2.01865	2.27861	2.85645	3.46314	2.73732	2.98232	2.47213	2.29865	2.74221	2.29843	2.10214	2.33048	2.87309	2.66318	2.08666	2.10485	2.35484	2.46569	2.73285	2.60679	2.4805	2.5042	2.31739	2.48896	2.2142	2.35338	2.42862	2.78438	3.25175	2.69331	2.86422	2.59595	2.74225	3.13534	2.5904	2.35164
Gpbar1	0	0	0	0	0	0	0	0	0	0	0	0	0	0.00199243	0	0	0	0	0	0	0	0	0	0.00112853	0	0	0	0	0	0	0	0	0	0	0	0	0	0	0	0	0	0	0	0	0	0	0	0	0
Aamp	1.77179	1.92563	1.38164	1.35284	1.40724	1.62845	2.21776	1.41528	1.42762	1.33124	1.40593	1.91647	1.3416	1.1658	1.29582	1.81675	2.4206	1.41891	1.23958	1.32373	1.32315	1.78992	1.2005	1.17285	1.19535	1.76904	1.91526	1.40946	1.28758	1.30123	0.821895	1.69708	1.27875	1.26708	1.25435	1.43017	1.83987	1.28023	1.14645	1.37481	1.78296	2.38044	1.59214	1.44625	1.34151	1.55957	2.38698	1.50121	1.13601
Gm28364	0	0	0	0	0	0	0.00169109	0	0	0	0	0	0.000891583	0	0	0	0.00150747	0	0	0	0	0	0	0	0	0	0	0	0	0	0	0	0	0	0	0	0	0	0	0	0	0	0	0	0	0	0	0	0
Pnkd	0.745748	1.03065	0.64745	0.634486	0.663582	0.734976	0.975478	0.63991	0.623339	0.637577	0.652429	0.810894	0.529845	0.507502	0.53867	0.812928	1.02722	0.924895	0.808982	0.842408	0.701383	0.951205	0.67682	0.558227	0.701947	0.895337	1.10458	0.700519	0.698072	0.695049	0	0.582996	0.558952	0.4504	0.545756	0.685226	0.971225	0.719696	0.604083	0.733054	0.71723	1.07049	0.773266	0.625152	0.701473	0.781716	0.906336	0.678795	0.57114
Tmbim1	0.235058	0.327603	0.264076	0.291886	0.25267	0.100192	0.159271	0.186602	0.208593	0.134484	0.198638	0.209201	0.181764	0.142172	0.217626	0.121347	0.143165	0.164441	0.193931	0.127535	0.109431	0.171363	0.152598	0.099266	0.133291	0.10366	0.171629	0.166382	0.146587	0.158329	0	0.211582	0.196036	0.210131	0.186652	0.116263	0.236911	0.200905	0.166606	0.141219	0.121429	0.137396	0.105674	0.117499	0.147643	0.0893647	0.136641	0.137002	0.108809
Catip	0	0	0.00411113	0.00214683	0.0101768	0.001338	0	0	0	0	0.00859344	0	0.00275213	0	0.00598657	0.00153343	0.0017081	0.00395153	0	0	0	0	0	0.00156406	0	0.0025437	0	0.000482319	0	0.00240789	0	0	0.00120737	0.0064489	0	0	0.00519212	0.00329056	0.00412188	0.0077207	0.00208226	0	0.0088832	0	0	0.00183944	0	0	0
Slc11a1	0	0	0.00095731	0	0	0.00101052	0	0	0	0	0	0	0	0	0.00498362	0	0	0	0.00575586	0	0	0	0.00144951	0	0	0	0	0	0	0	0	0	0	0	0	0	0.00554256	0	0	0	0	0	0	0.0147761	0	0	0	0	0
Ctdsp1	0.422141	0.25301	0.281593	0.31212	0.304967	0.292373	0.235967	0.29327	0.231777	0.230723	0.286644	0.245604	0.271545	0.26514	0.251873	0.31785	0.283233	0.281132	0.379391	0.32072	0.286486	0.238045	0.251144	0.21542	0.221551	0.268998	0.219983	0.322198	0.268315	0.224959	0	0.361352	0.245365	0.258802	0.257035	0.208876	0.286902	0.274012	0.223487	0.24766	0.204917	0.257155	0.338041	0.389618	0.262898	0.274054	0.183314	0.2531	0.260262
Vil1	0	0	0.00290631	0.00524604	0.00139441	0.00231035	0.00281681	0.00406002	0.00791265	0	0	0	0	0.00150367	0	0.00133126	0	0	0.00392313	0	0	0.00138452	0.00147899	0.00675429	0.00334165	0.00199914	0.00604147	0.00249734	0.0108126	0.00756593	0	0	0	0.00380701	0	0	0	0	0.00745474	0.00175719	0.0111087	0.00916397	0.0133695	0	0.00303399	0.0017644	0.00397443	0	0.00514468
Usp37	0.451513	0.374526	0.194243	0.272217	0.253086	0.377996	0.340797	0.308845	0.416442	0.397654	0.393411	0.333309	0.151513	0.245978	0.187214	0.345039	0.39887	0.326814	0.474722	0.37025	0.854249	0.598837	0.451029	0.570178	0.659261	0.351234	0.368641	0.330592	0.36375	0.307878	0	0.0719383	0.176725	0.340281	0.223683	0.362996	0.30164	0.241782	0.300085	0.294067	0.303392	0.334459	0.322994	0.396694	0.401146	0.592225	0.626706	0.631278	0.694118
Cnot9	0.0869533	0.0654699	0.133635	0.114789	0.146634	0.109088	0.11453	0.148527	0.0928037	0.148868	0.1263	0.112797	0.0982897	0.101718	0.166258	0.134255	0.121672	0.110352	0.0898676	0.129676	0.264618	0.247648	0.2516	0.266672	0.21218	0.221351	0.240931	0.271663	0.243092	0.258754	0	0.203517	0.099328	0.0945901	0.115935	0.117741	0.163763	0.14074	0.142769	0.138026	0.119093	0.128805	0.131197	0.0637612	0.0602545	0.189596	0.18321	0.178929	0.204557
Plcd4	0.0132747	0	0.00252196	0.00304974	0.00331212	0.00107347	0.00158744	0	0	0.00524942	0	0.0150821	0.00181463	0	0	0	0	0.00695831	0	0.00952508	0.00192802	0.00138955	0.00162748	0	0.0063723	0	0.0094955	0.00209287	0.00657906	0.00170546	0	0	0.00347918	0.00878896	0.0125764	0	0	0.00153654	0.00391899	0.00153438	0	0	0.0102647	0	0.00836285	0.00142351	0.00439491	0	0
Zfp142	0.071951	0.100908	0.124021	0.136603	0.125934	0.0857357	0.079771	0.124187	0.0983105	0.146788	0.110064	0.117773	0.0811992	0.121608	0.127007	0.0974339	0.106562	0.119053	0.115216	0.11506	0.108325	0.102426	0.112825	0.105239	0.100525	0.0961062	0.0902381	0.106499	0.0898075	0.119766	0	0.0509954	0.152044	0.105227	0.130326	0.0803677	0.150383	0.109364	0.101351	0.132491	0.0693441	0.121618	0.160121	0.0921077	0.106416	0.0726529	0.0997718	0.106631	0.0977368
Bcs1l	0.0955848	0.0537164	0.106268	0.0874208	0.0890472	0.0992688	0.124246	0.197394	0.104917	0.131731	0.082744	0.0832419	0.134944	0.125327	0.115907	0.133866	0.114237	0.0958388	0.108	0.146099	0.106127	0.105713	0.146437	0.159428	0.129039	0.11505	0.124258	0.16676	0.128343	0.123988	0	0.100273	0.106284	0.115541	0.0867421	0.131594	0.153815	0.149504	0.0789097	0.118494	0.122115	0.113756	0.0733811	0.0845138	0.125765	0.119118	0.102017	0.137586	0.0811768
Rnf25	0.119633	0.167537	0.121979	0.0856575	0.140048	0.139157	0.115952	0.121004	0.105613	0.146786	0.173517	0.0817677	0.129931	0.0835425	0.114483	0.155091	0.127304	0.238899	0.10826	0.158434	0.127025	0.0980764	0.0959801	0.105184	0.110985	0.144765	0.130743	0.104892	0.0582545	0.120941	0	0.151234	0.0945627	0.0894528	0.116697	0.102387	0.0854012	0.137356	0.122046	0.121322	0.14834	0.161726	0.241344	0.154388	0.16982	0.135913	0.112882	0.101218	0.0727461
Stk36	0.0217362	0	0.0280343	0.0208105	0.0186109	0.0193899	0.00736522	0.0329257	0.0208673	0.0175517	0.0189103	0.0103527	0.0116026	0.03025	0.0175993	0.025412	0.0182405	0.0225209	0.0148929	0.0332153	0.0124178	0.0107868	0.00789181	0.00467069	0.00879601	0.0285618	0.0102846	0.00926561	0.00810642	0.00664155	0	0	0.0177933	0.0300786	0.0211615	0.0101451	0.017558	0.00840245	0.0122597	0.00743141	0.0382415	0.0199861	0.0146813	0.0147723	0.0239398	0.0175503	0.0184852	0.0135688	0.00452156
Ttll4	0.0902701	0.0804888	0.0634594	0.0891832	0.111195	0.091819	0.112969	0.102941	0.103677	0.143132	0.0785316	0.123362	0.0598238	0.0958092	0.120916	0.121189	0.105657	0.118849	0.153075	0.159822	0.170479	0.116567	0.105521	0.152988	0.166289	0.16424	0.188644	0.107183	0.151542	0.166436	0	0.627032	0.0742312	0.127038	0.0917677	0.0853089	0.102784	0.074093	0.11346	0.110213	0.104192	0.0795028	0.16731	0.110853	0.118841	0.124077	0.0887554	0.128789	0.174404
Cyp27a1	0.0132747	0.0170113	0.0297169	0.100052	0.115976	0.0093163	0.00582203	0.0347465	0.0645367	0.0407999	0.0491868	0.0343611	0.0493847	0.100837	0.122299	0.0159505	0.0177945	0.0125094	0.0444143	0.0237565	0.0133779	0.00836496	0.0153482	0.0262526	0.021858	0.0109388	0.00200594	0.0131007	0.00943179	0.0251653	0	0.0535424	0.057894	0.122157	0.117281	0.0259601	0.00403148	0.0112886	0.040476	0.0324667	0.00491699	0.00597718	0.0241537	0.00645084	0.00786375	0.0147966	0.00306325	0.0105071	0.0175288
Prkag3	0	0	0.000842138	0	0.00118255	0	0	0	0	0	0	0	0.000947716	0.00197424	0.00355926	0	0	0.00418392	0	0	0.00376104	0	0	0.00179224	0	0	0	0	0	0.0014827	0	0	0	0	0	0	0	0.000945085	0	0	0	0	0.00699569	0	0	0	0	0	0
Wnt6	0.805978	0.466008	0.103636	0.128479	0.12018	1.43966	0.457057	0.577804	0.553227	0.516958	0.0679706	0.0279561	0.0291795	0.0107898	0.0377324	2.91356	1.90994	1.93324	2.57105	2.63668	0.826592	0.135163	0.0504733	0.0415229	0.142425	1.52067	0.262297	0.106428	0.0991748	0.0985235	0	0	0.0262724	0.0505426	0.0358971	0.181001	0.0154429	0.0436131	0.0308592	0.0213516	3.18911	2.13531	2.09916	2.27941	2.72836	2.0711	0.874772	0.785026	0.629884
Gm29539	0	0.0179399	0	0	0.000674433	0.0018328	0.00109608	0.00477423	0.0111249	0.00423449	0.00315188	0	0	0	0.00134425	0.0036419	0	0	0	0	0	0	0.00373575	0.0017877	0.00100286	0	0	0.000797532	0.00174943	0.000723852	0	0	0	0	0	0	0	0	0	0.00651429	0.00184475	0.00285053	0	0.0107241	0.0058804	0.00176089	0	0.00521561	0
Wnt10a	0	0	0	0	0.000642057	0	0.0033252	0	0	0	0	0	0	0	0	0.00231199	0.00165675	0.00535137	0	0	0	0	0.00160331	0	0	0	0.00172621	0	0	0	0	0	0	0.00431383	0	0	0	0	0	0.00284581	0.00199289	0	0	0	0	0.00079815	0	0	0
Cdk5r2	0	0	0	0	0	0	0	0.00264551	0	0	0	0	0	0	0	0	0	0	0	0	0	0	0	0	0	0	0	0.00148061	0	0	0	0	0	0	0	0	0	0	0	0	0	0	0	0	0	0	0	0	0
Fev	0	0	0	0	0	0	0	0	0	0	0	0	0	0	0	0	0	0	0	0	0	0	0	0	0	0	0	0	0	0	0	0	0	0	0	0	0	0	0	0	0	0	0	0	0	0	0	0	0
Cryba2	0	0	0	0.000707963	0	0	0	0	0	0	0	0	0	0	0	0	0	0	0	0	0	0	0	0	0	0	0	0	0	0	0	0	0	0	0	0	0	0	0	0	0	0	0	0	0	0	0	0	0
Cfap65	0	0	0	0	0	0	0	0	0	0	0	0	0	0	0	0	0	0	0	0	0	0.00156671	0	0	0	0	0	0	0	0	0	0	0	0	0	0	0	0	0.00419548	0	0	0	0	0	0.00339335	0	0	0	0
Gm15841	0	0	0	0	0	0	0	0	0	0	0	0	0	0	0	0	0	0	0	0	0	0	0	0	0	0	0	0	0	0	0	0	0	0	0	0	0	0	0	0	0	0	0	0	0	0	0	0	0
Ihh	0.0313356	0.400272	0.192983	0.180244	0.200218	0.847587	0.872849	1.26845	0.983343	1.65379	1.34642	0.555621	0.294739	0.52337	0.545944	0.265033	0.420456	0.486893	0.271255	0.435629	1.2641	1.08859	0.913553	0.879614	1.2771	0.848648	1.42897	0.594915	0.921344	1.27994	0	0.0509954	0.0736319	0.06535	0.069019	1.56162	0.903315	0.583715	0.839514	1.39754	0.559776	0.87199	1.15283	0.774884	1.04712	1.02792	1.11205	1.55278	1.04467
Nhej1	0.064858	0.04701	0.0581557	0.0378638	0.0612981	0.1891	0.162304	0.232386	0.164563	0.184893	0.1313	0.154056	0.0807133	0.0768738	0.0727991	0.165471	0.198171	0.189327	0.188138	0.217672	0.174433	0.180151	0.1365	0.089251	0.158211	0.291897	0.247846	0.157706	0.164172	0.162596	0	0.0576568	0.0592503	0.0421691	0.0426923	0.154069	0.124254	0.138855	0.146197	0.093038	0.215021	0.301798	0.371543	0.199432	0.284081	0.210964	0.237593	0.240002	0.32136
Slc23a3	0	0	0.00243879	0.00513873	0.000887213	0.000806394	0	0	0	0	0	0	0	0.00390932	0.00113644	0.00203741	0	0	0.00525934	0	0.00216105	0	0.00248599	0.00378062	0	0	0	0.000855467	0.00498198	0.00654779	0	0	0	0.00680971	0.00586222	0	0	0.00172395	0.00471431	0.00161431	0.00280159	0	0	0	0	0.00303537	0	0	0
Cnppd1	0.211358	0.317121	0.328539	0.306624	0.318353	0.214953	0.222554	0.24429	0.211241	0.194584	0.199039	0.178302	0.269257	0.233573	0.336476	0.208688	0.237291	0.257422	0.197661	0.238045	0.201234	0.141492	0.177963	0.196149	0.186895	0.153622	0.196899	0.178781	0.162178	0.178522	0.821895	0.452075	0.358867	0.346284	0.399447	0.206328	0.142383	0.177425	0.170684	0.250417	0.248159	0.259003	0.244997	0.250377	0.164866	0.227103	0.217888	0.218352	0.18015
Retreg2	0.560893	0.588712	0.654757	0.477226	0.570208	0.446788	0.512421	0.557265	0.447985	0.414185	0.487965	0.474638	0.452875	0.341775	0.421532	0.519086	0.577358	0.785352	0.399837	0.517213	0.530631	0.457202	0.510573	0.324751	0.386924	0.558837	0.471829	0.633792	0.47047	0.451968	0.821895	0.50736	0.50874	0.362451	0.496834	0.451082	0.439151	0.39749	0.359877	0.396644	0.47493	0.515917	0.694055	0.394744	0.485805	0.51109	0.601191	0.666972	0.402803
Zfand2b	0.136193	0.148722	0.19688	0.158942	0.151648	0.124666	0.107135	0.154117	0.0923429	0.0955436	0.0852339	0.107724	0.123246	0.118503	0.131013	0.125069	0.164892	0.187951	0.107126	0.143489	0.118668	0.116642	0.151605	0.100567	0.107954	0.123825	0.143593	0.143731	0.0891367	0.128792	0	0.214556	0.195091	0.154667	0.133258	0.115822	0.090329	0.144847	0.111302	0.128396	0.115695	0.190531	0.162458	0.078519	0.118243	0.108549	0.150418	0.178768	0.0562696
Abcb6	0.0911341	0.0531857	0.0709899	0.0646943	0.111909	0.0762029	0.0990993	0.0914829	0.142878	0.127207	0.0898024	0.12761	0.0968352	0.137944	0.111456	0.0603844	0.0572026	0.0554279	0.0419753	0.100044	0.142483	0.184288	0.166273	0.173002	0.186363	0.085383	0.117682	0.0953086	0.142122	0.110458	0	0.114986	0.0402399	0.0461702	0.0677012	0.121822	0.135803	0.138134	0.150568	0.155098	0.0869404	0.0739312	0.124438	0.112233	0.119568	0.115462	0.089548	0.157624	0.194553
Atg9a	0.0716503	0.0976247	0.177311	0.141412	0.153516	0.0959897	0.124198	0.156262	0.0949911	0.0886529	0.117484	0.13077	0.131626	0.128382	0.14606	0.0890577	0.115419	0.160493	0.142094	0.122771	0.0740593	0.115967	0.131848	0.110059	0.114022	0.0680527	0.0639204	0.15229	0.112971	0.115174	0	0.0576568	0.156714	0.172455	0.149615	0.0978007	0.125465	0.146464	0.111197	0.134901	0.080312	0.107419	0.217091	0.0850087	0.0720771	0.0815698	0.0938267	0.117821	0.124129
Ankzf1	0.022156	0.153561	0.137395	0.13998	0.158768	0.140258	0.174919	0.124235	0.0977921	0.153936	0.140284	0.125335	0.141856	0.137945	0.154217	0.121003	0.142428	0.103313	0.151461	0.168343	0.0988287	0.117198	0.124669	0.145111	0.113107	0.157939	0.136236	0.193053	0.166415	0.16239	0	0.232885	0.144675	0.154246	0.148123	0.115436	0.171362	0.126838	0.134378	0.169109	0.129175	0.190582	0.165316	0.139982	0.158645	0.127554	0.121241	0.178922	0.14433
Glb1l	0.177743	0.106479	0.0536669	0.0591817	0.0637329	0.0361954	0.0427757	0.0396496	0.0630519	0.0415128	0.0277615	0.0244129	0.0302962	0.0346319	0.0481781	0.0676172	0.0484366	0.0520178	0.0586962	0.0551301	0.0373859	0.0227073	0.0242853	0.010751	0.0305759	0.0384563	0.0598683	0.023536	0.018241	0.0222109	0	0	0.0343144	0.0611148	0.0407686	0.0299774	0.018581	0.0242587	0.0251398	0.0189752	0.0297847	0.0529443	0.097305	0.0762395	0.0650944	0.0441328	0.038987	0.0211731	0.0715808
Stk16	0.358813	0.319861	0.418832	0.378045	0.551397	0.375033	0.494536	0.515895	0.365303	0.48961	0.280138	0.419364	0.379954	0.343569	0.481857	0.422971	0.452728	0.58089	0.392559	0.519694	0.378384	0.427525	0.467426	0.326262	0.492982	0.499562	0.596524	0.436697	0.528671	0.522076	0.821895	0.447442	0.38923	0.329987	0.421648	0.428131	0.418678	0.416825	0.393556	0.542106	0.414239	0.608651	0.698414	0.402126	0.592669	0.42073	0.460896	0.626563	0.431479
Tuba4a	0.0172472	0.0929138	0.0777503	0.107714	0.0700706	0.022463	0.0256562	0.0754727	0.0663724	0.0338293	0.0437882	0.0268633	0.0476338	0.0795967	0.0422846	0.0326784	0.045112	0.0605592	0.0585779	0.0599332	0.0501174	0.0551471	0.0860828	0.0907266	0.0604618	0.053839	0.0909326	0.0980068	0.10471	0.0588076	0	0	0.0431448	0.0547063	0.043524	0.03725	0.0553054	0.063226	0.109139	0.0485362	0.0352838	0.0156743	0.0365568	0.026445	0.0213566	0.0431435	0.0323461	0.0371286	0.0775381
A630095N17Rik	0	0	0	0	0	0	0	0	0	0	0	0	0	0	0	0	0	0	0	0	0	0	0	0	0	0	0	0	0	0	0	0	0	0	0	0	0	0	0	0	0	0	0	0	0	0	0	0	0
Dnajb2	0.305692	0.324884	0.314368	0.25999	0.34548	0.196633	0.333127	0.418157	0.260688	0.311663	0.156294	0.254434	0.255993	0.178587	0.256515	0.244546	0.361067	0.32103	0.258845	0.30241	0.176005	0.233191	0.245057	0.176125	0.223721	0.163628	0.155229	0.175978	0.177634	0.181536	0.821895	0.387402	0.262372	0.21116	0.230655	0.173323	0.203116	0.20667	0.176794	0.218063	0.253073	0.426675	0.383755	0.216482	0.353363	0.239919	0.338148	0.376026	0.236384
Ptprn	0	0	0.018443	0.0113098	0.00522421	0	0	0	0	0	0	0	0.000834223	0.00223504	0	0.00140876	0	0.0112495	0	0.00324139	0	0.00238437	0	0	0.000961749	0	0	0	0.00244912	0	0	0	0	0.00270645	0	0	0	0.00353926	0	0.00364093	0	0	0	0	0.00721709	0	0	0	0
Gm28294	0	0	0	0	0	0	0	0	0	0	0	0	0	0	0	0	0	0	0	0	0	0	0	0	0	0	0	0	0	0	0	0	0	0	0	0	0	0	0	0	0	0	0	0	0	0	0	0	0
Resp18	0	0	0	0	0	0	0	0	0	0	0	0	0	0	0.00115505	0	0	0	0	0	0	0	0	0	0	0	0	0	0	0	0	0	0	0	0	0	0	0	0	0	0	0	0	0	0	0	0	0	0
Gm28902	0	0	0	0	0	0	0	0	0	0	0	0	0	0	0	0	0	0	0	0	0	0	0	0	0	0	0	0	0	0	0	0	0	0	0	0	0	0	0	0	0	0	0	0	0	0	0	0	0
Dnpep	0.655733	0.485615	0.909313	0.818428	0.781633	0.664558	0.502323	0.635252	0.547003	0.434826	0.677895	0.535052	0.738962	0.660301	0.661087	0.606513	0.557277	0.665181	0.397217	0.513948	0.613259	0.740652	0.954227	0.734593	0.708226	0.630135	0.760576	0.69476	0.656431	0.565055	0	0.372869	0.837023	0.789375	0.633176	0.840406	0.8015	0.950742	0.704979	0.727129	0.749166	0.57679	0.484028	0.58097	0.507441	0.6297	0.627078	0.731755	0.458039
Des	0.0601761	0	0.0270703	0.0142412	0.0130841	0.0131363	0.0121262	0.00807389	0.0075535	0.00387639	0.018138	0.00964305	0.00537427	0.00744702	0.00266289	0.0155292	0.0109175	0.00799125	0.0134021	0.00393669	0.00829394	0.0128678	0.0203362	0.0191302	0.0105939	0.00371784	0.0146502	0.00746195	0.00716272	0.0103407	0	0.063991	0.00687737	0.00417427	0.00564372	0.0226563	0.0110092	0.0162035	0.00458587	0.00301751	0.0218092	0.0095975	0.00648151	0.0133102	0.00354945	0.0075048	0.00922809	0.0126875	0.00993329
Gm15179	0	0	0	0	0	0	0	0	0	0	0	0	0	0	0	0	0	0	0	0	0	0	0	0	0	0	0	0	0	0	0	0	0	0	0	0	0	0	0	0	0	0	0	0	0	0	0	0	0
Speg	0.0391464	0.0354534	0.0419884	0.0300845	0.0427917	0.0143105	0.00785684	0.031232	0.0186798	0.00436323	0.0120381	0.0102325	0.0119294	0.0160673	0.0118381	0.0312376	0.0337204	0.04791	0.0334905	0.0103619	0.0183339	0.0024978	0.0142979	0.00517206	0.0153907	0.0335944	0	0.0147118	0.0139609	0.00419219	0	0	0.00568812	0.0170463	0.0235633	0	0.0320498	0.00977521	0.00756678	0.0141852	0.0317699	0.0457206	0.0157001	0.0375003	0.017783	0.0235157	0.0159927	0.0261493	0
Gm15178	0	0	0	0	0	0	0	0	0	0	0	0	0	0	0	0	0	0	0	0	0	0	0	0	0	0	0	0	0	0	0	0	0	0	0	0	0	0	0	0	0	0	0	0	0	0	0	0	0
Gmppa	0.093217	0.21522	0.210425	0.173763	0.161243	0.190198	0.171108	0.226598	0.195517	0.178606	0.18178	0.17452	0.233091	0.149421	0.17261	0.182545	0.221691	0.173406	0.143881	0.144767	0.159466	0.261767	0.334148	0.197904	0.209154	0.209361	0.336776	0.288958	0.21022	0.227333	0	0.180907	0.155147	0.184183	0.139922	0.233084	0.259839	0.324004	0.22997	0.256493	0.208738	0.187758	0.244669	0.156509	0.134629	0.182485	0.265142	0.2623	0.187093
Asic4	0	0	0.00177413	0.00359176	0.00103201	0.00860205	0.0126291	0.00948305	0.0128221	0.0326552	0	0	0.00050696	0.000937326	0	0.0086695	0.0583339	0.0293388	0.037039	0.0269722	0.00423257	0.00920867	0.0175841	0.0077287	0.00514294	0.00730078	0.0240139	0.00965187	0.00298483	0.0143515	0	0	0	0	0.00775003	0.00994144	0	0.000842856	0	0.00362228	0.00640602	0.0387894	0.0371373	0.0314209	0.0418309	0.00454041	0.0348103	0.0177872	0.0257288
Chpf	0.358441	0.497447	0.426473	0.409909	0.473157	0.316283	0.445865	0.546581	0.36971	0.366565	0.313868	0.400857	0.393029	0.304927	0.401026	0.284025	0.405773	0.511221	0.285299	0.351554	0.365062	0.462276	0.571049	0.364403	0.403548	0.275902	0.457936	0.431141	0.339917	0.366681	0	0.0786262	0.293496	0.336824	0.308671	0.331449	0.342228	0.485123	0.360606	0.459231	0.290059	0.384071	0.571719	0.284827	0.283247	0.364771	0.410344	0.609394	0.319675
Obsl1	1.24981	1.2147	1.38243	1.02257	0.922086	1.27108	1.42865	1.51314	1.14334	1.12695	1.30704	1.29109	1.3454	1.12794	0.993211	1.09421	1.14135	1.18463	0.978723	0.922963	1.37247	1.5952	2.05109	1.45763	1.49963	1.2351	1.86927	1.97612	1.44155	1.51517	1.64379	1.01301	0.695009	0.655172	0.565158	1.35004	2.02927	1.87565	1.23543	1.29271	1.16499	1.31385	1.52733	0.81591	1.03898	1.10439	1.17558	1.2232	1.15813
Tmem198	0.0240822	0	0.0358565	0.0377166	0.0288884	0.00678735	0.0247954	0.015801	0.0202587	0.0206993	0.0175801	0.0166431	0.0259148	0.0113467	0.0116695	0.00574724	0.0365346	0.0464666	0.0281804	0.0312857	0.0109422	0.00826695	0.00933687	0.00933251	0.0127694	0.0101474	0.014535	0.0242583	0.0154178	0.0141563	0	0	0.0205359	0.019149	0.0182604	0.0114864	0.0581427	0.0223267	0.0163513	0.0260787	0.0101359	0.0129872	0.0469319	0.00440283	0.0117907	0.00301763	0.0215003	0.0140813	0.00502305
Inha	25.9918	31.0955	24.8109	17.2402	20.3369	31.1469	43.2723	43.6121	31.8055	31.7668	66.6213	53.8857	42.3831	30.8784	32.3125	17.8846	24.6363	24.4865	14.1713	16.4535	49.5952	70.785	66.2746	48.0077	52.3242	36.476	77.7164	58.2335	50.1182	56.537	74.7925	22.5464	16.6449	15.2227	17.0286	93.3804	99.4946	72.2816	58.2769	63.5836	15.3725	23.1405	27.1549	17.8169	18.3134	21.1749	36.8323	38.5476	29.1238
Stk11ip	0.034847	0.0529741	0.0718698	0.0894358	0.0861348	0.0730696	0.0635424	0.0609616	0.0511001	0.0542466	0.0615644	0.0617761	0.0717254	0.0828667	0.0648657	0.062809	0.0558527	0.0581053	0.0287604	0.0514238	0.0772557	0.0682053	0.0852024	0.0959052	0.0683246	0.117466	0.0843693	0.0896832	0.101982	0.095911	0	0	0.0658624	0.0642361	0.0721271	0.0930597	0.100996	0.0954809	0.0785014	0.0705615	0.0687145	0.0864995	0.0407402	0.0822741	0.107698	0.074897	0.0656261	0.0787369	0.0695476
Slc4a3	0.248168	0.359462	0.145892	0.144647	0.120262	0.146249	0.166448	0.191445	0.106284	0.11269	0.160104	0.173392	0.123413	0.0785362	0.124232	0.164601	0.237839	0.283226	0.0895405	0.123907	0.0952054	0.132024	0.0953275	0.103834	0.106277	0.168048	0.156433	0.145517	0.115697	0.119365	0	0.118555	0.130009	0.125778	0.0824102	0.149838	0.174585	0.115878	0.1382	0.0989073	0.15585	0.177196	0.215067	0.156948	0.0818312	0.129981	0.154783	0.144018	0.0833123
Gm29065	0	0	0	0	0	0	0	0	0	0	0	0	0	0	0	0	0	0	0	0	0	0	0	0	0	0	0	0	0	0	0	0	0	0	0	0	0	0	0	0	0	0	0	0	0	0	0	0	0
Gm29069	0	0	0	0	0	0	0	0	0	0	0	0	0	0	0	0	0	0	0	0	0	0	0	0	0	0	0	0	0	0	0	0	0	0	0	0	0	0	0	0	0	0	0	0	0	0	0	0	0
Gm17751	0	0	0	0	0	0	0	0	0	0	0	0	0	0	0	0	0	0	0	0	0	0	0	0.00234875	0	0	0	0	0	0	0	0	0	0	0	0	0	0	0	0	0	0	0	0	0	0	0	0	0
Gm816	0	0	0	0	0	0.00126533	0	0	0	0	0	0	0.00108432	0	0	0	0	0	0	0	0	0	0	0	0	0	0	0	0	0	0	0	0	0	0	0	0	0	0	0	0	0	0	0	0	0	0	0	0
Epha4	0.112437	0.0878501	0.0461175	0.0245111	0.0441028	0.215968	0.0713027	0.0609574	0.0383715	0.0681781	0.291387	0.160914	0.173238	0.054529	0.0593611	0.113734	0.0603807	0.0498524	0.0105782	0.0702519	0.126645	0.170907	0.124996	0.0759004	0.0838647	0.0663355	0.108647	0.112454	0.0892055	0.0679824	0	0.261639	0.074491	0.0270022	0.0360832	0.219415	0.291077	0.165338	0.0827856	0.137597	0.101913	0.0655469	0.0555594	0.0373933	0.0443714	0.0763935	0.072516	0.0266172	0.0123296
Gm28386	0	0.00780566	0.00153009	0	0	0	0.00107433	0	0	0	0	0	0	0	0	0	0	0	0	0	0	0	0.00172982	0	0	0	0.00269174	0	0.000935656	0	0	0	0.00459466	0	0	0	0	0.00143798	0	0	0	0	0	0	0	0	0	0	0
Gm28387	0	0	0	0	0	0	0	0	0	0	0	0	0	0	0	0	0	0	0	0	0	0	0	0	0	0	0	0	0	0	0	0	0	0	0	0	0	0	0	0	0	0	0	0	0	0	0	0	0
Pax3	0	0	0	0	0	0	0	0	0	0	0	0	0	0	0	0	0	0	0	0	0	0	0.00107081	0	0	0	0	0	0.00494301	0	0	0	0	0	0	0	0	0	0	0.0012388	0	0	0	0	0	0	0	0	0
Sgpp2	0.0125206	0.183809	0.210519	0.265278	0.205446	0.0534891	0.0707128	0.133159	0.199774	0.159269	0.0724846	0.0820338	0.194275	0.351564	0.248617	0.0217741	0.0199939	0.0461792	0.099277	0.0383228	0.0365711	0.0352932	0.111615	0.168851	0.0940363	0.0248205	0.0438253	0.163047	0.174736	0.141805	0	0	0.127458	0.0959532	0.169473	0.0419378	0.0170333	0.154615	0.230713	0.173375	0.0131799	0.0362602	0.0141018	0.0341503	0.0412753	0.016075	0.045912	0.0795413	0.0956611
Gm28410	0.019626	0.00524188	0.0132482	0.00720841	0.0117613	0.0213689	0.00770846	0.00449571	0.00635043	0.00850901	0.0541642	0.00600874	0.0403578	0.0408428	0.0240094	0	0.00313309	0.0107575	0	0.00329322	0.00552642	0.0436466	0.00868075	0.0228383	0.0334248	0.0135281	0.0426019	0.0169623	0.0186367	0.0438597	0.821895	0	0.000890635	0.00849572	0.0164767	0.0861361	0.034439	0.0450267	0.0446981	0.0477763	0.00122953	0.00543866	0	0	0	0.00423795	0.00215898	0.0107715	0
Farsb	0.371433	0.29912	0.326251	0.255409	0.32334	0.297773	0.366395	0.327604	0.285883	0.288538	0.324218	0.419568	0.359848	0.322904	0.331306	0.307933	0.284223	0.274211	0.205123	0.248705	0.429811	0.517051	0.495685	0.363516	0.401085	0.328161	0.523286	0.478108	0.40938	0.370136	0	0.0535424	0.282416	0.198477	0.302446	0.326873	0.479336	0.525657	0.451499	0.454277	0.310246	0.302846	0.370854	0.23435	0.343517	0.346567	0.396594	0.471266	0.373766
BC035947	0	0	0	0	0	0	0	0	0	0	0	0	0	0	0	0	0	0	0	0	0	0	0	0	0	0	0	0	0	0	0	0	0	0	0	0	0	0	0	0	0	0	0	0	0	0	0.00267922	0	0
Mogat1	0	0	0	0.00271241	0	0	0	0	0.00543793	0	0.00404674	0	0.00349082	0	0.00152052	0	0.0012139	0	0	0	0	0	0	0	0	0.0018757	0	0	0	0.000670471	0	0	0	0.00298138	0	0	0.0161022	0	0	0	0	0	0	0	0	0	0	0	0
5730419F03Rik	0	0	0	0	0	0	0	0	0	0	0	0	0.000981593	0.00192074	0	0	0	0	0	0	0	0	0	0	0	0	0	0	0	0	0	0	0	0	0.00234914	0	0	0	0	0.00155624	0	0	0	0	0.00365084	0	0	0	0
Gm29611	0	0	0	0	0	0	0	0	0	0	0	0	0	0	0	0	0	0	0	0	0	0	0	0	0	0	0	0	0	0	0	0	0	0	0	0	0	0	0	0	0	0	0	0	0	0	0	0	0
Acsl3	0.447579	0.169898	0.149043	0.191152	0.254117	0.400216	0.348115	0.296413	0.240419	0.297303	0.613089	0.312231	0.179015	0.27786	0.326571	0.366595	0.296227	0.292487	0.217313	0.290101	0.502473	0.420569	0.256497	0.317379	0.318321	0.490135	0.36212	0.263147	0.365268	0.378273	0	0.366352	0.218783	0.27255	0.342171	0.436023	0.448287	0.233259	0.303488	0.257045	0.370933	0.310622	0.236026	0.255855	0.271478	0.384796	0.389648	0.439033	0.393704
Utp14b	0.273386	0.251397	0.142523	0.197832	0.15159	0.411797	0.326397	0.416215	0.330443	0.28919	0.690029	0.515495	0.283983	0.388486	0.230927	0.27215	0.3215	0.255694	0.152371	0.169704	0.407781	0.479962	0.452968	0.541781	0.424285	0.531638	0.485184	0.428411	0.632841	0.368665	0	0.180907	0.25161	0.358088	0.248709	0.66254	0.6099	0.352127	0.483356	0.277938	0.29187	0.274654	0.143797	0.367852	0.172981	0.315296	0.310982	0.411209	0.540435
Gm29536	0	0	0	0	0	0	0	0	0	0	0	0	0	0.00606972	0	0	0	0	0	0	0	0	0	0	0	0	0.00244671	0.00114524	0	0.00092423	0	0	0.00118899	0	0	0	0	0	0	0	0	0	0	0	0	0	0	0	0
Kcne4	0	0.00972212	0.00101036	0.001024	0.00713592	0	0	0.00268475	0	0	0	0	0.00117182	0.0031263	0.00287253	0	0.00129141	0.00628489	0	0.00351319	0.00111326	0	0.00144388	0.00190614	0	0.00455965	0	0.00124461	0	0.00092423	0	0	0	0.00287383	0	0	0	0.00107456	0	0.0021475	0	0	0	0	0	0.00138289	0	0	0
Gm29187	0	0	0	0	0	0	0	0	0	0	0	0	0	0	0	0	0	0	0	0	0	0	0	0	0	0	0	0	0	0	0	0	0	0	0	0	0	0	0	0	0	0	0	0	0	0	0	0	0
Scg2	0	0	0.0029827	0.000675657	0.00136069	0.0041109	0	0	0	0.00217896	0.0048939	0.00447251	0.00086345	0.00159251	0.00572059	0	0.00129411	0	0	0	0	0.0105527	0.00138473	0.0215405	0.000965901	0	0	0.0025744	0.0042616	0.00170193	0	0	0.00505445	0	0.00143433	0	0.00518228	0	0.00298287	0	0	0	0	0	0	0	0	0	0
Ap1s3	0	0	0.00313791	0.00273806	0.00286882	0.00292176	0.00147011	0	0.00642279	0.00684746	0	0	0.00220307	0.00169001	0.00101449	0	0.000849915	0	0.00596538	0	0	0	0.0028939	0.00710912	0.00255105	0	0	0.00176184	0.00129794	0.00125514	0	0	0	0.00656232	0.00202227	0	0.00817836	0.00250567	0.00662119	0.00411912	0	0	0	0	0	0	0.00222173	0	0
Wdfy1	0.0757653	0.144082	0.089707	0.145049	0.117999	0.0846074	0.0785047	0.081015	0.0914919	0.0993845	0.0725745	0.0822247	0.0744639	0.0876262	0.0774518	0.0897686	0.0878169	0.083557	0.111201	0.101257	0.0500084	0.0820387	0.0718289	0.0801559	0.0841025	0.0741855	0.093504	0.0650114	0.0707928	0.0570967	0	0.063991	0.097811	0.0824812	0.084573	0.0201465	0.0955734	0.0669378	0.0754264	0.0924569	0.097989	0.0788908	0.169409	0.0822661	0.12149	0.0703993	0.0802197	0.0846997	0.067419
Mrpl44	0.166076	0.164311	0.211039	0.222105	0.218746	0.221935	0.208214	0.17113	0.241009	0.275941	0.254852	0.154891	0.213421	0.207241	0.211817	0.27085	0.161187	0.207142	0.171394	0.236288	0.220261	0.241114	0.242171	0.227939	0.295285	0.306485	0.274678	0.232637	0.288453	0.251279	0	0	0.185221	0.147425	0.214013	0.17434	0.245062	0.265558	0.213658	0.318472	0.277155	0.198938	0.316537	0.248666	0.303721	0.212608	0.279599	0.209859	0.269667
Serpine2	4.00896	4.07564	5.55222	5.11732	5.05489	11.6288	10.5515	11.2899	11.5043	12.048	10.6437	10.0985	8.2851	9.46957	9.2598	8.03377	6.16108	5.9127	5.12095	5.39879	12.6977	12.4862	13.4471	14.0256	12.8736	10.0819	11.541	10.4119	11.0851	11.3002	13.1503	5.79386	4.44077	4.10891	4.8139	16.3046	15.2432	12.5008	12.9824	12.9982	11.7609	10.0074	10.929	9.08963	10.3204	12.8581	11.3669	11.9594	11.2627
9830004L10Rik	0	0	0	0	0.0012333	0	0	0	0	0	0	0	0	0	0	0	0	0	0	0	0	0	0	0	0	0	0	0	0	0	0	0	0	0	0	0	0	0	0	0	0	0	0	0	0	0	0	0	0
Fam124b	0	0	0	0	0.000459015	0	0	0	0	0	0	0	0	0	0	0	0	0	0	0	0	0	0.00162748	0	0	0	0	0.00103229	0	0	0	0	0	0	0	0	0	0	0	0	0	0	0	0	0	0	0	0	0
2310015K22Rik	0	0	0	0	0	0	0	0	0	0	0	0	0	0	0	0	0	0	0	0	0	0	0	0	0	0	0	0	0	0	0	0	0	0	0	0	0	0	0	0	0	0	0	0	0	0	0	0	0
Cul3	1.29208	1.03774	0.989619	1.09309	1.20001	1.15935	1.06581	0.967157	0.910271	0.842842	1.14576	0.990553	0.869242	0.973492	0.927048	1.13055	1.08333	0.966183	0.897614	1.03169	1.02921	0.940718	0.840659	0.911456	0.947054	1.42252	1.01877	0.945662	1.05651	1.18554	0.821895	1.634	0.979438	1.07364	1.34046	0.852255	0.973951	0.883337	0.936378	0.914109	1.21506	0.977125	1.02241	1.11453	0.896307	1.10982	0.977172	0.941092	0.914496
Gm29125	0	0	0	0	0	0	0	0	0	0	0	0	0	0	0	0	0	0	0	0	0	0	0	0	0	0	0	0	0	0	0	0	0	0	0	0	0	0	0	0	0	0	0	0	0	0	0	0	0
1700016L21Rik	0	0	0	0	0	0	0	0	0	0	0	0	0	0	0	0	0	0	0	0	0	0	0	0	0	0	0	0	0	0	0	0	0	0	0	0	0	0	0	0	0	0	0	0	0	0	0	0	0
Gm45261	0	0	0	0	0	0	0	0	0	0	0	0	0	0	0	0	0	0	0	0	0	0	0	0	0	0	0	0	0	0	0	0	0	0	0	0	0	0	0	0	0	0	0	0	0	0	0	0	0
Dock10	0	0	0.00085656	0.00713004	0.00184427	0.000900802	0.00154685	0	0	0	0.00782773	0.00251753	0.000942003	0	0.0011862	0	0	0	0	0	0.00289359	0.00177006	0.000812094	0.0024726	0.0011083	0.00303899	0.00190044	0.00288559	0.0036452	0.003681	0	0	0.00478122	0	0.00494944	0	0	0.00502353	0	0.00381314	0	0	0	0	0	0.00542164	0	0	0
Nyap2	0	0	0.000556757	0	0.00186664	0	0.00429747	0	0	0	0.00255356	0	0.00304606	0.00230987	0.00180622	0	0.00131556	0	0	0	0	0	0	0.00626135	0.00195729	0.00248188	0	0.000808827	0	0	0	0	0	0.00325329	0	0	0	0.00402125	0	0	0.00124672	0	0	0	0	0	0.00146147	0	0.00598441
Irs1	0.14769	0.2513	0.147252	0.205613	0.196632	0.167209	0.127464	0.0927287	0.158358	0.115603	0.192892	0.184361	0.145065	0.168761	0.241796	0.180512	0.113437	0.117441	0.144986	0.143516	0.119091	0.0856315	0.084263	0.144701	0.0971759	0.105412	0.111981	0.104429	0.150021	0.126746	0.821895	0.185132	0.292317	0.499961	0.567236	0.145954	0.146164	0.077333	0.12084	0.122761	0.0983534	0.0939889	0.089111	0.0818046	0.109842	0.0890922	0.0714755	0.0326376	0.127804
Gm9747	0	0	0.00238683	0.00276605	0.00159427	0.00107416	0.00437201	0.00731768	0.00314153	0	0	0.00938675	0.00479757	0.0062431	0.00402533	0.00124863	0.00625826	0.00684279	0	0.00432386	0	0.00159212	0.00138348	0.00585705	0	0	0.00276693	0.00106676	0	0.00259929	0	0	0.0177117	0.00766994	0.00499054	0	0.0109755	0.00274695	0	0	0.00153537	0.00569644	0.00933221	0	0	0	0.00407817	0	0.00654794
Rhbdd1	0.0190853	0.0409764	0.054965	0.0600568	0.0626661	0.0368864	0.0455682	0.0380304	0.0384129	0.031589	0.0553378	0.030839	0.076469	0.0664444	0.0455811	0.0379346	0.0463055	0.0370011	0.0409228	0.0829969	0.0359985	0.0309981	0.0436785	0.0608989	0.04253	0.0424055	0.0439964	0.0544987	0.0569315	0.0730145	0	0	0.057332	0.058698	0.0714278	0.0389268	0.0547673	0.0388142	0.0801066	0.0424779	0.0478987	0.0307855	0.0104046	0.0401242	0.0298117	0.0291226	0.0353756	0.032636	0.042638
Gm28940	0	0	0	0	0.0022211	0.000915223	0.00116387	0	0	0	0	0	0	0	0	0.00103543	0	0	0	0	0	0	0	0	0.0011562	0.00495346	0	0.000730018	0	0.00170193	0	0	0	0	0	0	0	0	0	0.00594209	0	0	0	0	0	0	0	0	0
Col4a4	0.651787	0.651605	0.281225	0.302362	0.24828	0.140606	0.250352	0.285996	0.25295	0.145064	0.22208	0.181661	0.143855	0.139562	0.102319	0.209182	0.361395	0.43493	0.401547	0.203191	0.112266	0.10717	0.093764	0.0556585	0.0787187	0.151032	0.0881727	0.0848416	0.082166	0.108821	0	0.514215	0.301321	0.361728	0.265261	0.0709538	0.0283497	0.0450705	0.0467122	0.0632581	0.10084	0.132079	0.146521	0.107032	0.0912426	0.108267	0.143372	0.177011	0.160164
Col4a3	0.283668	0.2401	0.0665345	0.0728909	0.0690046	0.0518265	0.0806432	0.0915284	0.0864218	0.035808	0.0486414	0.0590316	0.0378477	0.0320339	0.0221138	0.100166	0.162333	0.136306	0.138612	0.105407	0.0413322	0.0249523	0.0134065	0.0218755	0.0244823	0.0337104	0.0207514	0.0249268	0.0280427	0.0288267	0	0.165515	0.103921	0.124556	0.0613751	0	0.00635276	0.0160773	0.0179542	0.00560961	0.0405484	0.0602607	0.0965775	0.0250012	0.0441381	0.0738616	0.0766037	0.0655843	0.0775381
Mff	0.974941	1.0781	0.968975	0.832225	1.0193	0.965494	0.986521	0.923422	0.766461	0.867607	0.937379	0.869254	1.07846	0.979395	1.10814	1.00153	1.06932	0.944288	0.754697	0.864252	0.845404	0.900926	0.91293	0.774364	0.831758	0.957346	0.976215	1.03195	0.92394	0.949567	0.821895	0.59476	1.08166	1.02795	1.108	0.746051	0.891026	0.98954	0.896068	1.05076	0.985606	1.1095	1.03722	0.935886	0.838418	0.936124	0.946112	0.814014	0.781014
Tm4sf20	0	0	0	0	0	0	0	0	0	0	0	0	0	0	0	0	0	0	0	0	0	0.00192795	0	0	0	0	0	0.000594513	0	0	0	0	0	0	0.00251491	0	0	0	0	0	0.00129647	0	0	0	0	0	0	0.00413037	0.00657641
Gm47791	0	0	0	0	0	0	0	0	0	0	0	0	0	0	0	0	0	0	0	0	0	0	0	0	0	0	0	0	0	0	0	0	0	0	0	0	0	0	0	0	0	0	0	0	0	0	0	0	0
Gm28942	0	0	0	0	0	0	0	0	0	0	0	0	0	0	0	0	0	0	0	0	0	0	0	0	0	0	0	0	0	0	0	0	0	0	0	0	0	0	0	0	0	0	0	0	0	0	0	0	0
Agfg1	0.666438	0.43692	0.400056	0.43145	0.419318	0.427855	0.5103	0.408985	0.437016	0.307707	0.522745	0.405805	0.317856	0.391075	0.320263	0.451275	0.47383	0.425666	0.404543	0.335483	0.399179	0.429171	0.334624	0.315287	0.346394	0.505148	0.436795	0.3599	0.414659	0.346246	0	0.335465	0.484114	0.426583	0.395181	0.395668	0.344441	0.271393	0.286439	0.290295	0.463976	0.446004	0.442587	0.367545	0.399835	0.476626	0.410347	0.404367	0.529879
A030005L19Rik	0	0	0.00247416	0.00226742	0.00196996	0.00313619	0	0	0	0	0.00380221	0.00227098	0	0.00214164	0	0	0.00251028	0	0.0114608	0	0	0.00155825	0	0	0.000929374	0	0.0016651	0.000884409	0.00709104	0.00203002	0	0	0.00206318	0.0136921	0	0	0	0.000829629	0.0052636	0.00234402	0.00132108	0	0	0	0	0	0	0	0
A030014E15Rik	0	0	0.00153713	0.00280556	0	0.00122732	0	0	0	0	0	0	0.00110768	0	0	0.00127519	0	0	0	0	0	0	0	0.00142821	0	0	0	0	0	0	0	0	0	0	0.00160081	0	0	0	0.00277901	0	0	0	0	0	0	0	0	0	0
Gm6217	0	0	0	0	0	0	0	0	0	0	0	0	0	0	0	0	0	0	0	0	0	0	0	0	0	0	0	0	0	0	0	0	0	0	0	0	0	0	0	0	0	0	0	0	0	0	0	0	0
A030003K21Rik	0	0	0	0	0	0	0	0	0	0	0	0	0	0	0	0	0	0	0	0	0	0	0	0	0	0	0	0	0	0	0	0	0	0	0	0	0	0	0	0	0	0	0	0	0	0	0	0	0
Gm7544	0	0	0	0	0	0	0	0	0	0	0	0	0	0	0	0	0	0	0	0	0	0	0	0	0	0	0	0	0	0	0	0	0	0	0	0	0	0	0	0	0	0	0	0	0	0	0	0	0
Gm47955	0	0	0	0	0	0	0	0	0	0	0	0	0	0	0	0	0	0	0	0	0	0	0	0	0	0	0	0	0	0	0	0	0	0	0	0	0	0	0	0	0	0	0	0	0	0	0	0	0
Gm47959	0	0	0	0	0	0	0	0	0	0	0	0	0	0	0	0	0	0	0	0	0	0	0	0	0	0	0	0	0	0	0	0	0	0	0	0	0	0	0	0	0	0	0	0	0	0	0	0	0
Slc19a3	0.0178675	0	0.0063012	0.00419821	0.0101542	0.0102529	0.00368084	0.00858746	0.0170927	0.0176478	0.0371668	0.00961955	0.00286881	0.0189549	0.0150623	0.00709096	0.00747795	0.0107481	0	0.0168702	0.0162265	0.0101949	0.00280464	0.0100707	0.0131125	0.0103442	0.00159142	0.00541231	0.0193422	0.0267407	0	0	0.00295294	0.00656232	0.0116734	0.0402413	0	0.000640761	0.00281443	0.00602781	0.00950694	0	0.0345395	0.00585924	0.0155106	0.00884452	0.00252304	0.0159426	0
Krtap28-10	0	0	0	0	0	0	0	0	0	0	0	0	0	0	0	0	0	0	0	0	0	0	0	0	0	0	0	0	0	0.00239972	0	0	0	0	0	0	0	0	0	0	0	0	0	0	0	0	0	0	0
Gm47969	0	0	0	0	0	0	0	0	0	0	0	0	0	0	0	0	0	0	0	0	0	0	0	0	0	0	0	0	0	0.000861892	0	0	0	0	0	0	0	0	0	0	0	0	0	0	0	0	0	0	0
A030005K14Rik	0	0	0	0	0	0	0	0	0	0	0	0	0	0	0	0	0	0	0	0	0	0	0	0	0	0	0	0	0	0	0	0	0	0	0	0	0	0	0	0	0	0	0	0	0	0	0	0	0
Krtap28-13	0	0.0045779	0	0.00113487	0	0	0	0.00194325	0	0	0	0	0	0	0	0.000995681	0	0	0	0	0	0	0	0	0	0	0	0	0.00168459	0	0	0	0	0	0	0	0	0	0	0	0	0	0	0	0	0	0	0	0
Ccl20	0	0	0	0	0	0	0	0	0	0	0	0	0	0	0	0.00147097	0	0	0	0	0	0	0	0	0	0	0	0	0	0	0	0	0	0	0	0	0	0	0	0	0	0	0	0	0	0	0	0	0
Daw1	0	0	0.00072182	0	0.00156283	0.000865789	0.00540361	0.0021536	0	0	0	0.00227261	0	0.00177484	0.00184689	0.00148175	0	0	0	0	0.00305479	0.00163761	0.00451155	0	0.00274329	0	0.00206657	0	0.00083699	0.00131526	0	0	0.00272356	0.00392278	0.0014547	0	0	0	0	0	0.00533452	0	0	0	0	0	0.00197839	0	0
Sphkap	0	0	0	0	0	0	0	0	0	0	0	0	0	0	0	0	0	0	0	0	0	0.00284778	0	0	0	0.00303899	0	0	0	0	0	0	0.00142496	0.00525314	0	0	0	0	0	0	0.00192611	0	0	0	0	0	0	0	0
4933436I20Rik	0	0	0	0	0	0	0	0	0	0	0	0	0	0	0	0	0	0	0	0	0	0	0	0	0	0	0	0	0	0	0	0	0	0	0	0	0	0	0	0	0	0	0	0	0	0	0	0	0
Pid1	0.265969	0.591844	0.957776	0.544976	0.633198	0.10764	0.104272	0.311297	0.149009	0.197498	0.396815	0.772977	1.9546	1.2286	1.54872	0.0360483	0.0217183	0.106101	0.0845752	0.0379424	0.111794	0.249233	0.471339	0.442243	0.284479	0.0309342	0.160488	0.728488	0.328287	0.280732	0	1.80645	2.13413	1.42393	1.39722	0.112907	0.268188	0.919944	0.528643	0.474848	0.0244455	0.0235957	0.0505785	0.0304597	0.0361688	0.0617583	0.0597172	0.0855231	0.0900883
Dner	0.0118754	0	0.00475337	0.00487752	0.00513879	0.00208391	0	0	0.00391482	0.00109372	0.0103134	0	0.00173843	0.0104533	0.000666646	0.00654241	0	0	0	0	0.00173892	0.00312491	0	0	0.000858384	0.00752432	0.00304892	0.002454	0.00473557	0.00372904	0	0	0.00755543	0.00484152	0.00777679	0.00733487	0.0223398	0.00451289	0	0.00290863	0	0	0.012788	0	0	0.00639782	0	0	0.00386284
Trip12	1.00527	0.778624	0.776202	0.884021	0.853299	0.958984	0.773489	0.597125	0.809782	0.696692	0.785093	0.583366	0.566057	0.644057	0.766587	0.997909	0.902154	0.803849	1.03197	0.889866	0.703978	0.54357	0.567447	0.672575	0.654387	0.877099	0.714419	0.505543	0.747704	0.662418	0	0.636445	0.675743	0.891435	0.953617	0.68781	0.451087	0.526562	0.61734	0.738549	0.97079	0.877703	0.952465	0.9439	0.807901	0.813338	0.637981	0.644003	0.656368
Fbxo36	0.118477	0.0729548	0.253898	0.250894	0.218087	0.11384	0.100403	0.150685	0.116357	0.107234	0.101809	0.0770028	0.161066	0.142849	0.179343	0.118776	0.100669	0.111779	0.108947	0.165319	0.105967	0.113141	0.173936	0.182156	0.168147	0.170364	0.155681	0.1743	0.137502	0.151857	0	0.159883	0.191241	0.179173	0.180812	0.129903	0.111228	0.233933	0.183713	0.201972	0.117828	0.089728	0.123896	0.151847	0.201893	0.129702	0.109613	0.148021	0.10521
Slc16a14	0	0	0	0	0	0.000993147	0	0	0	0	0.00341054	0	0	0	0	0	0	0	0	0	0	0	0.00424264	0	0	0.00718619	0	0	0	0	0	0	0	0	0	0	0	0.00156423	0	0.00165147	0	0.00309584	0	0	0	0	0	0	0
C130026I21Rik	0	0	0	0	0.00229615	0	0	0	0	0	0	0	0	0	0.00180947	0	0	0	0	0	0	0	0	0	0	0	0	0	0	0	0	0	0	0	0	0	0	0	0	0	0	0.00338436	0	0	0	0	0	0	0
A530032D15Rik	0	0	0.00084339	0	0	0	0	0	0	0	0	0	0.000869166	0	0	0	0	0	0	0	0	0	0	0.00195982	0.00250919	0	0	0	0	0	0	0	0	0	0	0	0	0	0	0	0	0	0	0	0	0	0.00205436	0	0
Gm10553	0	0	0	0	0	0	0	0	0	0	0	0	0	0	0	0	0	0	0	0	0	0	0	0	0	0	0	0	0	0	0	0	0	0	0	0	0	0	0	0	0	0	0	0	0	0	0	0	0
A530040E14Rik	0	0	0	0	0	0	0	0	0	0	0	0	0	0	0	0	0	0	0.00237544	0	0	0	0	0	0	0	0	0	0	0	0	0	0	0	0	0	0	0	0	0	0	0	0	0	0	0	0	0	0
Gm16028	0	0	0	0	0	0	0	0	0	0	0	0	0	0	0	0	0	0	0	0	0	0	0	0	0	0	0	0	0	0	0	0	0	0	0	0	0	0	0	0	0	0	0	0	0	0	0	0	0
Gm16025	0	0	0	0	0	0	0	0	0	0	0	0	0	0	0	0	0	0	0	0	0	0	0	0	0	0	0	0	0	0	0	0	0	0	0	0	0	0	0	0	0	0	0	0	0	0	0	0	0
Gm16092	0	0	0	0	0	0	0	0	0	0	0	0	0	0	0	0	0	0	0	0	0	0	0	0	0	0	0	0	0	0	0	0	0	0	0	0	0	0	0	0	0	0	0	0	0	0	0	0	0
G530012D18Rik	0	0	0	0	0	0	0	0	0	0	0	0	0	0	0	0	0	0	0	0	0	0	0	0	0	0	0	0	0	0	0	0	0	0	0	0	0	0	0	0	0	0	0	0	0	0	0	0	0
Sp110	0	0.0110127	0.0138828	0.00423338	0.0103583	0.00126609	0	0.00133346	0	0	0	0	0.00921632	0.00276118	0.00596504	0	0	0.0098751	0	0	0	0	0.00880352	0.0038509	0.00431254	0	0	0.014259	0.0022686	0.00116846	0	0.0786262	0.00576614	0.00678607	0	0	0	0.00482828	0	0.00178007	0	0	0.00610165	0	0	0	0	0.00728706	0
Gm16094	0	0	0	0	0	0	0	0	0	0	0	0	0	0	0	0	0	0	0	0	0	0	0	0	0	0	0	0	0	0	0	0	0	0	0	0	0	0	0	0	0	0	0	0	0	0	0	0	0
Sp140	0	0.00858835	0.056757	0.041527	0.022197	0.00342754	0.0103564	0.0126487	0.028688	0.0144584	0	0.0264189	0.0587199	0.0331447	0.0365398	0	0.00783853	0.0044238	0.0160045	0.0059588	0.00374509	0.0141881	0.0319605	0.0442638	0.0200128	0.00213105	0.0357049	0.0330107	0.0286494	0.0180901	0	0.0522488	0.0573336	0.013631	0.0311613	0	0.00571256	0.0647132	0.0291055	0.0172396	0.00352422	0.014405	0.00973452	0.00543661	0	0.00328045	0.00654961	0.0135406	0.00522324
Gm10552	0	0	0	0	0	0	0	0	0	0	0	0	0	0	0	0	0	0	0	0	0	0	0	0	0	0	0	0	0	0	0	0	0	0	0	0	0	0	0	0	0	0	0	0	0	0	0	0	0
Gm17017	0	0	0	0	0	0	0	0	0	0	0	0	0	0	0	0	0	0	0	0	0	0	0	0	0	0	0	0	0	0	0	0	0	0	0	0	0	0	0	0	0	0	0	0	0	0	0	0	0
Sp100	0	0	0.00703729	0.00422535	0.00887335	0	0.00168522	0	0	0.00216966	0	0	0.00306828	0	0.0140622	0	0	0.00915555	0	0	0	0	0.00291365	0	0.00424949	0.0056398	0	0.00126019	0.00319114	0.0030294	0	0	0.00606087	0.0128692	0.0157201	0	0	0.00503467	0.00379638	0	0	0	0	0	0	0.00160383	0	0	0
A630001G21Rik	0	0	0	0.00797394	0.00423087	0	0.00162855	0	0.00659265	0	0	0.00705718	0.00191622	0.00809201	0.0123753	0	0	0	0	0	0	0	0.0030361	0	0.00130731	0	0	0	0	0	0	0	0.00231497	0.0120409	0.00675049	0	0	0.0014725	0.00286592	0.00904301	0	0	0	0	0	0	0.00322312	0	0
9930111H07Rik	0	0	0	0.00113682	0	0	0	0	0	0	0	0	0	0.0018676	0	0	0	0	0	0	0	0	0	0	0	0	0	0	0	0	0	0	0	0	0	0	0	0	0	0	0	0	0	0	0	0	0	0	0
Cab39	0.53024	0.366817	0.446334	0.554568	0.696529	0.379399	0.282505	0.373258	0.352601	0.47864	0.400342	0.310975	0.328365	0.380336	0.452767	0.407181	0.347725	0.341778	0.433179	0.527638	0.335684	0.243438	0.248022	0.313396	0.3964	0.461195	0.298318	0.367034	0.422607	0.454683	0	0.550956	0.507724	0.641463	0.678473	0.274239	0.228449	0.263237	0.358305	0.439279	0.417959	0.304128	0.341677	0.497239	0.397923	0.387001	0.311333	0.292849	0.313382
Itm2c	2.24615	1.4486	0.94078	1.33387	1.30765	1.54285	0.816883	0.767161	0.962219	0.893207	1.11032	0.635851	0.653541	1.01934	0.814677	2.07731	1.17108	1.24643	1.48947	1.49188	1.03484	0.642049	0.664244	0.811223	0.706617	1.1177	0.527349	0.531139	0.570352	0.566225	0	0.635333	0.597917	1.00731	1.0273	1.32432	0.571965	0.74241	0.762673	0.723395	2.09761	1.20928	1.45097	1.63901	1.75176	1.53964	0.953295	0.885605	0.916249
4933407L21Rik	0	0	0	0	0.00106367	0.00111254	0.00121745	0	0	0	0.00314846	0	0	0	0	0	0	0.00987402	0	0	0	0.00151032	0	0	0	0	0	0	0	0	0	0	0	0	0	0	0	0	0	0.00163213	0.00509934	0.00227339	0	0	0	0.00171067	0	0	0
Gm28884	0	0	0	0	0	0	0	0	0	0	0	0	0	0	0	0	0.0017106	0	0	0	0	0.00110914	0	0.00140896	0.00145509	0	0.00215176	0	0	0	0	0	0	0	0	0	0	0	0	0	0.00170266	0	0	0	0	0	0	0	0
Gpr55	0	0.00954106	0.000863186	0	0	0	0.00129663	0	0	0	0	0	0	0	0	0	0.00189742	0.00751927	0.0134623	0	0	0.00147259	0.00278569	0	0	0	0	0.000715491	0	0	0	0	0	0	0	0	0	0.0012352	0.00175848	0	0.00173786	0.00228216	0	0	0.00849092	0	0.00203887	0	0
Gm28100	0	0	0	0	0	0	0	0	0	0	0	0	0	0	0	0	0	0	0	0	0	0	0	0	0	0	0	0	0	0	0	0	0	0	0	0	0	0	0	0	0	0	0	0	0	0	0	0	0
Spata3	0	0	0	0	0	0	0	0	0	0	0	0	0	0	0	0	0	0	0	0	0	0	0	0	0	0	0	0	0	0.00100393	0	0	0	0	0	0	0	0	0	0	0	0	0	0	0	0	0	0	0
2810459M11Rik	0	0	0.000938117	0	0	0.00145778	0	0	0	0	0	0	0	0	0	0	0.00307205	0.00379933	0.00582294	0	0.00216105	0.00284778	0.00110769	0	0.00102704	0	0	0	0.00183041	0.00178061	0	0	0	0	0	0	0	0.000908166	0	0	0.00974481	0	0	0	0	0	0	0	0
Psmd1	1.23899	1.10179	1.23277	1.14758	1.14873	1.10571	1.20687	1.14409	1.02273	0.930017	1.15474	1.20512	0.95173	1.04096	0.8837	1.14571	1.06128	1.0428	1.02444	0.980985	1.38692	1.77469	1.81527	1.62255	1.53108	1.71312	1.97132	1.6248	1.75051	1.66413	0	1.13923	0.944965	0.934122	0.839987	1.20009	1.89395	1.66467	1.43681	1.32249	1.14443	1.20704	1.10674	0.999274	1.02866	1.35805	1.35492	1.51152	1.32997
Htr2b	0	0.00660759	0.0016173	0.00195021	0	0.00200052	0	0.0028103	0.00540376	0.00498805	0.0098812	0.00509346	0	0	0	0.00362153	0.00618805	0.0102539	0.0115439	0	0.00224117	0.00439794	0.00107992	0	0.00108556	0.00577516	0	0.00243247	0	0.00785682	0	0	0.0028288	0	0	0.00857891	0.0393252	0	0.00199483	0	0	0.00271269	0	0	0.00474396	0.00641114	0	0	0
Gm21972	0	0.0113355	0	0	0	0	0.00281812	0	0	0	0	0	0	0	0.00179784	0.00122751	0	0	0	0.00294554	0.00408772	0	0.000656395	0	0.00199829	0.00274979	0	0.000716936	0	0	0	0	0	0.00300825	0.00432937	0	0	0	0.00278112	0	0	0	0	0	0	0.00331117	0	0	0.0116926
Armc9	0.0830017	0.0501307	0.0927092	0.13124	0.100117	0.147562	0.139793	0.161651	0.191604	0.190155	0.136305	0.115638	0.106394	0.0738282	0.109852	0.177436	0.166512	0.144308	0.127624	0.14374	0.191835	0.169872	0.186071	0.198289	0.20232	0.143237	0.163901	0.0945172	0.113343	0.130669	0	0	0.0916485	0.132823	0.107887	0.164632	0.163604	0.128646	0.144465	0.174051	0.146414	0.15683	0.15741	0.183244	0.196202	0.203191	0.185447	0.251706	0.192385
Gm16341	0	0	0	0	0	0	0	0	0	0	0	0	0	0	0	0	0	0	0	0	0	0	0	0	0	0	0	0	0	0	0	0	0	0	0	0	0	0	0	0	0	0	0	0	0	0	0	0	0
B3gnt7	0	0.0115382	0.00300185	0.00936508	0.0113636	0.00333728	0.00751053	0.0160313	0.00826173	0.011158	0.00228599	0.00184699	0	0.00174296	0.00204388	0.00866483	0.00661915	0.0111373	0.00237544	0.0187561	0.00415267	0.00290405	0.0055603	0.00615989	0.00809561	0.00220074	0.00357187	0.00389532	0.00285719	0.0060978	0	0	0.00636312	0.00305139	0.00227619	0	0.00936381	0.000854501	0.0108754	0.00177862	0.00334683	0.011204	0	0.00486153	0.00610482	0.006482	0	0.0321949	0.00410744
Gm28626	0	0	0	0	0.000738116	0	0	0	0	0	0	0	0	0	0	0.0013615	0	0	0	0	0	0	0	0	0	0	0.00109605	0	0	0	0	0	0	0	0	0	0	0	0	0	0	0	0.00711731	0	0	0	0	0	0
Ncl	7.13625	7.58818	7.15654	7.35749	7.15625	11.4762	12.8271	11.021	11.7827	11.3797	9.97033	12.9012	10.162	9.98454	9.71873	10.3212	9.95331	8.26884	8.75959	8.02966	15.4134	16.3192	12.9714	14.38	12.8989	13.0303	13.9384	11.6565	12.3419	11.0782	9.04085	9.05437	7.15724	6.53239	6.64501	10.1875	12.3341	10.2494	10.0515	9.26953	11.7403	12.3145	9.78153	12.8696	10.7539	14.417	15.3855	14.5806	15.4458
Nmur1	0	0	0	0	0	0	0.00233038	0	0	0	0	0	0	0	0	0	0	0	0	0	0	0	0	0	0	0	0	0	0	0	0	0	0	0	0	0	0	0	0	0	0	0	0	0	0	0	0	0	0
Tex44	0	0	0	0	0	0	0	0	0	0	0	0	0	0	0	0	0	0	0	0	0	0	0	0	0	0	0	0	0	0	0	0	0	0	0	0	0	0	0	0	0	0	0	0	0	0	0	0	0
Ptma	31.5645	23.8184	24.54	32.3323	29.9216	30.8787	26.5836	21.2997	28.9171	25.9814	29.0975	26.5853	22.0486	31.2436	24.6261	32.1771	26.5387	22.6821	30.0585	26.0635	40.9742	38.0664	33.0624	40.9675	33.9674	45.8056	41.4024	33.7369	44.5295	38.2637	28.7663	20.4138	22.545	30.565	27.6873	35.1148	37.0401	29.3829	35.2531	28.3575	33.6602	26.5588	24.1745	33.2488	28.3557	39.6568	31.6	29.7146	39.2019
Pde6d	0.498592	0.308676	0.202924	0.36975	0.451268	0.379122	0.162318	0.169477	0.262953	0.262195	0.343261	0.155149	0.120741	0.268424	0.287868	0.33352	0.204875	0.254068	0.297474	0.432167	0.390066	0.1744	0.16801	0.239118	0.310477	0.464469	0.183032	0.190998	0.42803	0.421492	0	0.27836	0.143761	0.335981	0.343322	0.337054	0.193819	0.183241	0.264261	0.345601	0.387332	0.200986	0.185227	0.216287	0.294474	0.419774	0.222075	0.232146	0.336538
Cops7b	0.114253	0.131105	0.0792826	0.111584	0.134002	0.110532	0.101303	0.106932	0.123619	0.136543	0.111857	0.10092	0.0666319	0.0553657	0.112437	0.142334	0.0796484	0.147322	0.122231	0.102375	0.128615	0.0892639	0.0962111	0.0987935	0.130861	0.10131	0.0944901	0.068332	0.104771	0.123246	0.821895	0.0509954	0.0807397	0.124627	0.119847	0.115325	0.105261	0.061582	0.0692168	0.0952541	0.129913	0.136742	0.17912	0.125408	0.133	0.135862	0.121799	0.0550712	0.120136
Nppc	0.186204	0.0827794	0.0656846	0.174993	0.467822	0.176553	0.117286	0.287507	0.291349	0.341395	0.489887	0.216429	0.175028	0.385068	0.904885	0.079534	0.0569355	0.0898411	0.0358846	0.0718313	0.298392	0.386196	0.394558	0.705692	1.60673	0.302231	0.376568	0.341072	0.672386	1.34031	0	0.327081	0.0840238	0.471515	0.846179	0.457319	0.690436	0.391089	0.995875	2.10258	0.123368	0.109933	0.140346	0.23567	0.174167	0.119011	0.101301	0.258221	0.301747
Dis3l2	0.250132	0.309198	0.259724	0.267721	0.261638	0.303996	0.287086	0.303285	0.374345	0.281193	0.32091	0.330795	0.233159	0.299341	0.247019	0.263956	0.210267	0.238406	0.206913	0.19712	0.253241	0.265378	0.314725	0.261319	0.251964	0.349728	0.332177	0.33579	0.297348	0.298025	0	0.196875	0.224354	0.311464	0.234645	0.246376	0.321573	0.299453	0.222154	0.295854	0.273444	0.278208	0.333638	0.227032	0.224684	0.250197	0.254158	0.339417	0.305068
Gm28375	0	0	0	0.00120669	0	0	0	0	0	0	0	0.00238119	0	0	0	0	0	0.00388755	0	0	0	0	0	0	0	0	0	0	0	0	0	0	0	0	0	0	0	0	0	0	0	0	0	0	0	0	0	0	0
Gm29371	0	0	0	0.00192728	0	0	0	0	0	0	0	0.00327639	0	0	0	0	0	0	0	0	0	0.00144892	0	0.00234177	0	0	0.0016651	0.00212885	0	0	0	0	0	0	0	0	0	0	0	0	0	0	0	0	0	0	0	0	0
Alppl2	0	0	0	0	0	0	0	0	0	0.0013696	0	0	0	0	0	0	0	0	0	0	0	0	0.00173521	0	0.000862974	0	0	0.00248796	0	0.000858349	0	0	0	0	0	0	0	0.00123331	0	0	0	0	0	0	0	0	0	0	0
Alpi	0	0	0.000873993	0	0	0	0	0	0	0	0	0	0	0	0	0	0	0	0	0	0	0	0	0	0	0	0	0	0	0	0	0	0	0	0	0	0	0	0	0	0	0	0	0	0	0	0	0	0
Akp3	0	0	0	0	0	0	0	0	0	0	0	0	0	0	0	0	0	0	0	0	0	0	0	0	0	0	0	0	0	0	0	0	0	0	0	0	0	0	0	0	0	0	0	0	0	0	0	0	0
Gm29374	0	0	0	0	0	0	0	0	0	0	0	0	0	0	0	0	0	0	0	0	0	0	0	0	0	0	0	0	0	0	0	0	0	0	0	0	0	0.00145644	0	0	0	0	0	0	0	0	0	0	0
Ecel1	0	0	0.00407063	0.00310763	0	0	0.00367664	0.00309145	0	0.00185708	0	0.00300796	0	0	0	0	0.00384825	0	0	0	0	0.00194115	0.000982357	0.000916845	0.000870697	0	0.0031061	0.000482491	0.00219838	0	0	0	0.00117952	0	0	0.00833297	0	0	0	0.0024546	0	0	0	0	0	0.00149443	0	0	0
Prss56	0	0	0	0	0.00205542	0.00181984	0.0029453	0.00133346	0	0.00388327	0	0	0.00100793	0	0	0	0.00141239	0.00388755	0.0103218	0.0124637	0.00428139	0.00501253	0.00492595	0	0.0006102	0.00634694	0.00120662	0.00208654	0	0.00285467	0	0	0.0012363	0.00298138	0	0	0	0.00136181	0	0.00338538	0.00418047	0	0	0.0165672	0	0.00540166	0.00460747	0	0
Chrnd	0	0	0	0	0	0	0	0	0	0	0	0	0	0	0	0	0	0	0	0	0	0	0.00101532	0	0	0	0	0	0	0	0	0	0	0	0	0	0	0.00303691	0	0	0	0	0	0	0	0	0	0	0
Chrng	0	0	0	0	0	0	0	0.00626346	0	0	0	0	0	0	0	0	0	0	0	0	0	0	0	0	0	0	0	0	0	0.00175808	0	0	0.0015322	0	0	0	0	0	0	0	0	0.0030302	0	0	0	0	0	0	0
Eif4e2	1.16565	1.21494	1.24998	1.04781	1.09433	1.12315	1.44255	1.53262	1.20921	1.17926	1.18256	1.5401	1.30109	1.24365	1.10492	1.11361	1.30611	1.15124	0.965598	1.05835	1.17522	1.50405	1.47823	1.34566	1.24529	1.12836	1.56777	1.40666	1.35782	1.33421	0.821895	0.939563	1.40431	1.1742	1.12184	1.12428	1.47785	1.48106	1.32819	1.32214	1.06859	1.43375	1.38976	1.16499	1.04114	1.15462	1.38625	1.51775	1.33249
Efhd1	0	0.0616742	0	0.0127676	0.00554205	0.00554294	0.00163449	0	0.00338208	0.00498256	0	0	0.00105489	0	0.00309593	0.00798542	0.00151785	0	0.00681338	0.0081052	0.00191252	0	0.00310428	0.00477654	0.00601115	0.0168252	0.00530149	0.00263724	0.00135168	0.00176004	0	0	0.00186904	0.00806782	0.00124991	0	0	0.00121807	0	0	0.00428871	0.00328821	0	0	0.00284057	0.0040625	0.00396981	0	0
Efhd1os	0	0	0	0	0	0	0	0	0	0	0	0	0	0	0	0	0	0	0	0	0	0	0	0	0	0	0	0	0	0	0	0	0	0	0	0	0	0	0	0	0	0	0	0	0	0	0	0	0
Gigyf2	0.642749	0.543001	0.577639	0.621414	0.677789	0.801306	0.763793	0.715878	0.667652	0.770716	0.639996	0.624758	0.460343	0.575585	0.650756	0.754563	0.779206	0.661773	0.689119	0.882433	0.596164	0.535179	0.512249	0.492399	0.668577	0.902203	0.77834	0.63023	0.588346	0.702512	0.821895	0.334894	0.523334	0.511431	0.611465	0.600556	0.559831	0.478832	0.530164	0.620206	0.861899	0.779077	0.75487	0.824873	0.876541	0.675241	0.665462	0.612923	0.571467
Kcnj13	0.0225252	0.00954106	0.0097411	0.0053122	0.0107495	0.00897646	0.00697518	0.00902779	0.00508385	0.00643001	0.00325238	0.0114138	0.00633537	0.00476299	0.00286351	0.00289967	0.017165	0.00388755	0.0116655	0.00998247	0.00427493	0.0059467	0.00476575	0.00722256	0.00514574	0.00788519	0.00236344	0.00985403	0.00300425	0.00492101	0	0	0.00440624	0	0.0057408	0.00743602	0.00402497	0.00370365	0.00844528	0.00617645	0.00173071	0.00853037	0.0174501	0.014636	0	0.0118085	0.00609533	0.00953976	0.00895261
3110079O15Rik	0	0	0	0	0	0	0	0	0	0	0	0	0	0.0027233	0	0	0	0	0	0	0	0	0	0	0.0006102	0	0	0.00234166	0	0	0	0	0	0	0	0	0	0	0	0	0	0	0	0	0	0	0	0	0
Ngef	0	0	0.00295797	0.00115972	0.00290183	0	0.00396007	0.0011136	0	0	0	0.00137912	0	0	0.00421854	0.00113109	0.0169572	0.011508	0.00749845	0.00329699	0	0.00163558	0.0116385	0	0.000916511	0.00374633	0.00173749	0.00135172	0	0	0	0	0	0	0	0	0.00820703	0	0	0.00161347	0.00176776	0	0	0	0.0106438	0.00198906	0.00675732	0	0.00539788
Neu2	0	0	0	0	0	0	0	0	0	0	0	0	0	0	0	0	0.00630961	0	0	0	0.00234205	0.00120041	0	0.00169842	0	0	0	0	0	0	0	0	0	0	0	0	0	0	0	0	0	0	0	0	0	0	0	0	0
Inpp5d	0	0	0	0	0	0	0	0.00717005	0	0.00224045	0	0	0.00153427	0	0	0.00101921	0	0	0	0	0	0	0	0	0.00158224	0	0	0	0	0.00166323	0	0	0	0	0	0	0	0	0	0	0	0	0	0	0.00323836	0	0	0	0
Atg16l1	0.252181	0.209082	0.134759	0.210686	0.231765	0.28691	0.331389	0.28498	0.25608	0.265907	0.270558	0.244721	0.161865	0.150567	0.210355	0.262511	0.287755	0.297648	0.222691	0.230833	0.196161	0.187851	0.178224	0.18106	0.218875	0.266113	0.195617	0.166222	0.197963	0.199823	0	0.245749	0.198574	0.249558	0.203595	0.193312	0.15984	0.170871	0.130289	0.201712	0.284611	0.366485	0.392867	0.242256	0.234413	0.2976	0.287599	0.324404	0.296551
Sag	0.121059	0.0108537	0.0113834	0.0184521	0.028212	0.0316381	0.0240486	0.0216563	0.017451	0.0272166	0.0753411	0.0236754	0.0118985	0.0297658	0.0170672	0.0398803	0.0231039	0.0149431	0.0534936	0.044216	0.028336	0.026324	0.0149837	0.0176706	0.0324842	0.0165219	0	0.0121523	0.0233663	0.020777	0	0	0.0397035	0.0277667	0.0296625	0.0387401	0.006133	0.0133172	0.00665523	0.0296886	0.0286861	0.0289668	0.0416643	0.00702487	0.0410806	0.0323523	0.0253979	0.0282442	0.0256165
Dgkd	0.35886	0.216438	0.186427	0.209434	0.198682	0.349745	0.312288	0.232472	0.249091	0.253114	0.374637	0.228865	0.202532	0.152835	0.217267	0.369595	0.330977	0.198551	0.234893	0.221607	0.296721	0.277673	0.181454	0.155894	0.248057	0.297559	0.235745	0.211327	0.197044	0.229073	0	0.176212	0.221525	0.218013	0.196158	0.332759	0.292901	0.171712	0.13231	0.140106	0.360451	0.313785	0.251273	0.32246	0.262971	0.346973	0.315567	0.196564	0.210127
Gm19582	0	0	0	0	0	0.00100803	0	0	0	0	0	0	0	0	0	0	0	0	0	0	0	0	0	0	0	0	0.00343193	0.000729378	0	0	0	0	0.00118899	0.00216136	0	0	0.00453647	0	0	0	0	0	0	0	0	0	0	0	0
Usp40	0.540376	0.329128	0.298434	0.301041	0.342338	0.448282	0.432942	0.40609	0.37214	0.462469	0.388765	0.339236	0.32148	0.281559	0.428481	0.462485	0.412267	0.379107	0.303171	0.532275	0.369257	0.321427	0.309546	0.292633	0.384227	0.500902	0.419408	0.307808	0.385552	0.356858	0	0.104498	0.266802	0.330018	0.353493	0.375836	0.321118	0.333754	0.332117	0.375611	0.441916	0.464165	0.422164	0.514517	0.499669	0.42996	0.431848	0.393538	0.33179
Ugt1a10	0	0	0	0	0	0	0	0	0	0	0	0	0	0	0	0	0	0	0	0	0	0	0	0	0	0	0	0	0	0	0	0	0	0	0	0	0	0	0	0	0	0	0	0	0	0	0	0	0
Ugt1a9	0	0	0	0	0	0	0	0	0	0	0	0	0	0	0	0	0	0	0	0	0	0	0	0	0	0	0	0	0	0	0	0	0	0	0	0	0	0	0	0	0	0	0	0	0	0	0	0	0
Ugt1a8	0	0	0	0	0	0	0	0	0	0	0	0	0	0	0	0	0	0	0	0	0	0	0	0	0	0	0	0	0	0	0	0	0	0	0	0	0	0	0	0	0	0	0	0	0	0	0	0	0
Ugt1a7c	0	0	0	0	0	0	0	0	0	0	0	0	0	0	0	0	0	0	0	0	0	0	0	0	0	0	0	0	0	0	0	0	0	0	0	0	0	0	0	0	0	0	0	0	0	0	0	0	0
Ugt1a6b	0	0	0	0	0	0	0	0	0	0	0	0	0	0	0	0	0	0	0	0	0	0	0	0	0	0	0	0	0	0	0	0	0	0	0	0	0	0	0	0	0	0	0	0	0	0	0	0	0
Ugt1a6a	0	0.00810273	0	0	0	0	0	0	0	0	0	0	0	0	0	0.00186122	0	0	0	0	0	0	0	0	0	0	0	0	0	0	0	0	0	0	0	0	0	0	0	0	0	0	0	0	0	0.000808616	0	0	0
Ugt1a5	0	0	0	0	0	0	0	0	0	0	0	0	0	0	0	0	0	0	0	0	0	0	0	0	0	0	0	0	0	0	0	0	0	0	0	0	0	0	0	0	0	0	0	0	0	0	0	0	0
Ugt1a2	0	0	0	0	0	0	0	0	0	0	0	0	0	0	0	0	0	0	0	0	0	0	0	0	0	0	0	0	0	0	0	0	0	0	0	0	0	0	0	0	0	0	0	0	0	0	0	0	0
Dnajb3	0.0113479	0	0.0184082	0.0207365	0.0237469	0.0083836	0.0142781	0.0115392	0.00572883	0.0121845	0	0.0100723	0.0177036	0.0236594	0.018152	0.00924174	0.00767163	0.0294153	0.0196921	0.00841531	0.0112977	0.0190906	0.0250564	0.0230891	0.0210499	0.0285471	0.0246954	0.021236	0.0175525	0.0351111	0	0	0.011122	0.0320505	0.0161676	0.00920721	0.0100573	0.0198036	0.032398	0.0408299	0.0150371	0.0184444	0.0133983	0.00666445	0.0154562	0.0185931	0.00957764	0.0335515	0.00577775
Ugt1a1	0	0	0	0	0	0	0	0	0	0	0	0	0	0	0	0	0	0	0	0	0	0	0	0	0	0	0	0	0	0	0	0	0	0	0	0	0	0	0	0	0	0	0	0	0	0	0	0	0
Mroh2a	0	0	0.0130672	0.00871609	0.0101891	0.00568422	0.0103468	0.00948631	0.00707373	0.00440062	0.0038721	0.0173805	0.01138	0.0204597	0.011048	0.00268403	0.0076282	0.0251243	0	0.00196118	0.00613546	0.0395924	0.0304312	0.0188343	0.0188827	0.00440012	0.016705	0.0164317	0.0210508	0.0237471	0	0	0.0091637	0.00453232	0.0105707	0	0.0420085	0.0235593	0.0213125	0.00970698	0.00628288	0.0156523	0.0167319	0	0	0.00371633	0.00915126	0.0157401	0.0219219
Hjurp	0.9125	1.34899	2.14449	1.94532	1.52818	0.597585	1.49886	1.85135	1.51347	1.58745	0.836115	1.81736	2.37988	1.90454	1.99378	0.515064	1.08062	1.36672	1.15176	1.07204	1.21596	2.72013	3.75031	2.65959	2.87498	3.0905	4.53377	5.67222	4.54962	5.04782	0	1.11036	1.22024	0.935051	0.962546	0.588627	2.46015	3.2305	2.20421	2.10418	0.577119	1.20902	1.53243	1.20389	1.08822	0.757487	1.71851	2.17719	1.77694
Trpm8	0	0	0	0	0	0	0	0	0	0	0	0	0	0	0	0	0	0	0	0	0	0	0	0	0	0	0	0	0	0	0	0	0	0	0	0	0	0	0	0	0	0	0	0	0	0	0	0	0
4930453O03Rik	0	0	0	0	0	0	0	0	0	0	0	0	0	0	0	0	0	0	0	0	0	0	0	0	0	0	0	0	0	0	0	0	0	0	0	0	0	0	0	0	0	0	0	0	0	0	0	0	0
Spp2	0	0	0	0	0	0	0	0	0	0	0	0	0	0	0	0	0	0	0	0	0	0	0	0	0	0	0	0	0	0	0	0	0	0	0	0	0	0	0	0	0	0	0	0	0	0	0	0	0
Gm29538	0	0	0	0	0	0	0	0	0	0	0	0	0	0	0	0	0	0	0	0	0	0	0	0	0	0	0	0	0	0	0	0	0	0	0	0	0	0	0	0	0	0	0	0	0	0	0	0	0
Gm28888	0	0	0	0	0	0	0	0	0	0	0	0	0	0	0	0	0	0	0	0	0	0	0	0	0	0	0	0	0	0	0	0	0	0	0	0	0	0	0	0	0	0	0	0	0	0	0	0	0
Glrp1	0	0	0	0	0	0	0	0	0	0	0	0	0	0	0	0	0	0	0	0	0	0	0	0	0	0	0	0	0	0	0	0	0	0	0	0	0	0	0	0	0	0	0	0	0	0	0	0	0
Gm19589	0	0	0	0	0	0	0	0	0	0	0	0	0	0	0	0	0.00228481	0.00577291	0	0	0	0	0	0	0	0	0	0	0.00168453	0	0	0	0	0	0	0	0	0	0	0	0	0.00260586	0	0	0	0	0	0	0
Gm29336	0	0	0	0	0	0	0.00132795	0.00370646	0	0	0	0	0.00108953	0	0	0	0	0	0	0	0	0	0	0.00427936	0	0	0	0	0	0.00296483	0	0	0	0.00275073	0.00352359	0	0	0	0	0	0.00136868	0	0	0	0	0	0	0	0
Arl4c	0.177487	0.364602	0.10963	0.0896737	0.0756426	0.278778	0.28642	0.299967	0.284675	0.110031	0.0985992	0.218102	0.105886	0.0712265	0.0815272	0.461956	0.629686	0.521449	0.429962	0.271458	0.146604	0.130416	0.0556346	0.0725981	0.0396268	0.336001	0.150206	0.0726079	0.0780892	0.0884609	0	0.353586	0.137599	0.147861	0.135139	0.157266	0.0466355	0.0507507	0.0524945	0.0293082	0.322609	0.373973	0.241447	0.452364	0.250904	0.175516	0.226756	0.179262	0.196583
Platr5	0	0	0	0	0	0	0	0	0	0	0	0	0	0	0	0	0	0	0	0	0	0	0	0	0	0	0	0	0	0	0	0	0	0	0	0	0	0	0	0	0	0	0	0	0	0	0	0	0.00714017
Gm29337	0	0	0	0	0	0	0	0	0	0	0	0	0	0	0	0	0	0	0	0	0	0	0	0	0	0	0	0	0	0	0	0	0	0	0	0	0	0	0	0	0.00187229	0	0	0	0	0	0	0	0
1700067G17Rik	0	0	0	0	0.000857401	0.00155182	0	0	0	0.0010927	0	0	0.00262065	0.00192685	0.00316929	0	0.00144416	0.00335846	0	0	0	0.00148683	0.00497649	0.00269857	0.00274186	0	0	0	0.000915571	0	0	0	0	0.00275073	0	0	0	0.00126617	0	0.00178007	0.00187229	0	0	0	0	0	0.00162424	0	0
Sh3bp4	0.193695	0.189554	0.204406	0.223145	0.207492	0.171024	0.139491	0.191438	0.143941	0.238218	0.145692	0.173609	0.338739	0.291965	0.390619	0.149085	0.17465	0.215526	0.181848	0.240202	0.11663	0.141934	0.235087	0.1837	0.235417	0.172505	0.237404	0.269301	0.233313	0.223627	0.821895	0.300185	0.210498	0.229645	0.279643	0.124541	0.173272	0.293599	0.222689	0.279135	0.215713	0.141311	0.196049	0.163028	0.269108	0.192426	0.133656	0.161645	0.199656
Gm28342	0	0	0	0	0	0	0	0	0	0	0	0	0	0	0	0	0	0	0	0	0	0	0	0	0	0	0	0	0	0	0	0	0	0	0	0	0	0	0	0	0	0	0	0	0	0	0	0	0
C030007H22Rik	0	0	0	0	0	0	0	0	0	0	0	0	0	0	0	0	0	0	0	0	0	0	0	0	0	0	0	0	0	0	0	0	0	0	0	0	0	0	0	0	0	0	0	0	0	0	0	0	0
Agap1	0.371021	0.464876	0.421634	0.410283	0.438294	0.399303	0.47109	0.471012	0.383425	0.343049	0.383729	0.446432	0.369403	0.368152	0.321313	0.352493	0.472147	0.361095	0.262061	0.326244	0.428918	0.474617	0.46013	0.419026	0.414192	0.401101	0.552971	0.471487	0.378265	0.369975	0	0.430657	0.358289	0.318816	0.287402	0.312838	0.481396	0.422364	0.293989	0.409948	0.365216	0.465406	0.340367	0.350346	0.327917	0.39112	0.581495	0.469701	0.39913
Gbx2	0	0	0	0	0	0	0	0	0	0	0	0	0	0	0	0	0	0	0	0	0	0	0	0	0	0	0	0	0	0	0	0	0	0	0	0	0	0	0	0	0	0	0	0	0	0	0	0	0
Asb18	0	0	0	0	0	0	0	0	0	0.00134168	0	0	0	0	0	0	0	0	0	0	0	0	0	0	0	0	0	0	0	0	0	0	0	0	0	0	0	0	0	0	0	0	0	0	0	0	0	0	0
Iqca	0	0	0	0	0	0.00163873	0	0	0	0	0	0	0	0.00154016	0	0	0	0	0	0	0	0.00198113	0	0	0.000745332	0.00216658	0	0	0	0	0	0	0	0	0	0	0	0	0	0	0.0015266	0.00322487	0	0	0	0	0	0	0
4930434B07Rik	0	0	0	0	0	0	0	0	0	0	0	0	0.000971402	0	0	0	0.0019905	0	0	0.00570327	0	0	0	0	0	0	0	0.000734826	0	0	0	0	0	0	0	0	0	0	0	0	0	0	0	0	0.00278329	0	0	0	0
Ackr3	0.144679	0.202261	0.226081	0.219192	0.275566	0.239842	0.272594	0.393476	0.185365	0.420016	0.360867	0.34522	0.14844	0.134202	0.16543	0.220483	0.135746	0.211338	0.155728	0.248804	0.199041	0.286019	0.0794183	0.0298132	0.103215	0.258994	0.251055	0.105239	0.0538199	0.0754184	0	0.415544	0.18361	0.122372	0.219545	0.364702	0.217162	0.0582072	0.0629915	0.08294	0.301942	0.289429	0.366017	0.253338	0.565772	0.274642	0.319507	0.332562	0.149465
Gm28721	0	0	0	0	0	0	0	0	0	0	0	0	0	0	0	0	0	0	0	0	0	0	0	0	0	0	0	0	0	0	0	0	0	0	0	0	0	0	0	0	0	0	0	0	0	0	0	0	0
Gm28723	0	0	0.00340113	0.00437824	0.010861	0.00215616	0.00644626	0.00317685	0	0	0	0.00270271	0.00369844	0.00482435	0.00445239	0	0.0048367	0	0.0140101	0	0	0.0130934	0.00238399	0	0.0010873	0.0107847	0.00399989	0.00126019	0	0.000879535	0	0	0.00246144	0.00300805	0.00224767	0.0226879	0.00529893	0	0	0	0.00822355	0	0.00643965	0.0057843	0.0136106	0.00662517	0	0	0.00653491
Gm28722	0	0.00524188	0	0.00690509	0.00528868	0.0048203	0.00270918	0.00603671	0	0.00177614	0.00433683	0.00489403	0.00346117	0.0170766	0.00505908	0	0.00371518	0	0	0	0.0066166	0.010347	0.00368895	0.00203573	0.00195033	0.0196611	0.00794166	0.00477223	0.00133783	0.00881397	0	0	0.0155467	0	0.00298113	0.0274575	0.013092	0.00611316	0.00279392	0.0062414	0.00128703	0	0	0	0	0	0.00870412	0	0.0105167
Cops8	0.68779	0.663559	0.587847	0.69873	0.753616	0.820925	0.668889	0.692145	0.756163	0.785068	0.705233	0.651735	0.506315	0.690313	0.835569	0.76794	0.701864	0.675812	0.898998	0.883246	0.77139	0.591894	0.586375	0.690953	0.739506	0.95662	0.689458	0.654228	0.870132	0.806689	0	0.945721	0.593318	0.690716	0.755443	0.706125	0.580859	0.577169	0.715739	0.883711	0.822527	0.769837	0.881133	0.868897	0.840994	0.796709	0.708992	0.682858	0.737871
Gm9991	0	0	0	0	0	0	0	0	0	0	0	0	0	0	0	0	0	0	0	0	0	0	0	0	0	0	0	0	0	0	0	0	0	0	0	0	0	0	0	0	0	0	0	0	0	0	0	0	0
Col6a3	0.607458	0.492704	0.0783895	0.0801444	0.119492	0.217454	0.187726	0.256827	0.421399	0.55066	0.363313	0.233652	0.171465	0.176828	0.284496	0.227965	0.363541	0.418014	0.830471	1.15139	0.142558	0.139304	0.061925	0.15674	0.183127	0.176447	0.113897	0.131188	0.110571	0.115312	0	1.1503	0.498381	0.687426	0.725154	0.196334	0.0768376	0.0443146	0.0229743	0.0975941	0.0773764	0.10194	0.191127	0.52975	0.454725	0.117386	0.165102	0.169534	0.30712
Mlph	0.0512009	0.0249894	0	0.00543707	0	0.0207931	0.0209895	0.00482318	0.0179544	0.0133448	0.0324931	0.00567129	0	0	0	0.0136886	0.0261341	0.0123794	0.0551631	0.0419627	0.0231499	0.00801993	0	0	0.00390115	0.0296967	0.00575325	0.00157774	0.00083291	0.00806935	0	0	0	0	0.00308422	0.0150505	0	0.00140881	0.00231148	0	0.00142228	0.0250218	0.0246827	0.0526045	0.0186688	0.0126125	0.00975681	0.0227551	0.0253485
Prlh	0	0	0	0	0	0	0	0	0	0	0	0	0	0	0	0.00135827	0	0	0	0	0	0	0	0	0	0	0	0	0	0	0	0	0	0	0	0	0	0	0	0.00187665	0	0	0	0	0	0	0	0.00576404	0
Rab17	0.0262249	0.0459715	0.00377277	0.00328774	0.016021	0.00537361	0.00530724	0.00870889	0	0.00435204	0.0086055	0.0115887	0.00161479	0	0	0.00310715	0.0201144	0.00771231	0.0152512	0.0194278	0	0.00196657	0.0013826	0.00183912	0.00200713	0.0033575	0	0.00202798	0	0.0017314	0	0.109906	0.00197996	0	0	0	0	0.00681245	0	0	0	0.00442748	0	0	0	0	0.00148708	0	0
Gm28199	0	0	0	0	0	0	0	0	0	0	0	0	0	0	0	0	0	0	0	0	0	0	0	0	0	0	0	0	0	0	0	0	0	0	0	0	0	0	0	0	0	0	0	0	0	0	0	0	0
Lrrfip1	0.797796	0.70518	1.16435	0.50482	0.318959	0.251897	0.319936	0.277054	0.13589	0.0929771	0.303367	0.504978	0.874513	0.325791	0.199423	0.400615	0.43868	0.469234	0.254403	0.229232	0.223885	0.438484	0.477283	0.196768	0.119054	0.14417	0.337775	0.550615	0.11052	0.074293	0	1.02737	0.635518	0.236954	0.166768	0.298369	0.553002	0.745321	0.233242	0.134601	0.168233	0.198603	0.183922	0.0473061	0.0961124	0.173778	0.242725	0.400739	0.176796
Rbm44	0	0	0	0.0011238	0	0	0	0	0.00134516	0	0	0	0.00287912	0	0.00115667	0	0	0	0	0	0	0.00354552	0	0.00274027	0.00358953	0.00277498	0.00664734	0.000299072	0.00445131	0	0	0	0.00156957	0	0	0	0.0037548	0	0	0.00192612	0	0	0	0	0	0.00330185	0	0	0.00539788
Ramp1	0.814896	0.655101	0.330476	0.363674	0.275339	0.150314	0.128095	0.133673	0.116278	0.0957502	0.529258	0.304428	0.235495	0.17757	0.214011	0.296008	0.290826	0.406196	0.331372	0.345025	0.223824	0.290891	0.193627	0.262144	0.187659	0.120095	0.189127	0.18454	0.142229	0.153279	0	0	0.0853122	0.0288656	0.0774738	0.700654	0.329572	0.342427	0.284153	0.274199	0.0432442	0.0472624	0.0249329	0.051348	0.0500916	0.0909038	0.0712188	0.0583744	0.10125
Ube2f	0.577667	0.536809	0.513428	0.435782	0.486396	0.533895	0.626937	0.626319	0.497277	0.503461	0.627956	0.564684	0.503662	0.523897	0.471005	0.561389	0.589745	0.790273	0.452919	0.465148	0.52336	0.599677	0.491986	0.466287	0.556463	0.535991	0.509495	0.46713	0.492603	0.558003	0	0.615915	0.51833	0.390043	0.466323	0.485914	0.672128	0.553291	0.524292	0.550985	0.550164	0.480979	0.6222	0.39614	0.460426	0.566518	0.664639	0.668213	0.499666
Gm26683	0	0	0.00168569	0	0	0.000748054	0	0.00246661	0.00134516	0.00185669	0	0.00251993	0.000947831	0	0.00139607	0.00101875	0.0020546	0	0	0	0	0.00219802	0.00302044	0	0	0	0	0	0	0	0	0	0.00111601	0	0	0	0	0	0	0	0	0	0	0	0	0	0	0	0.00467493
Scly	0.0303509	0.0530178	0.0260487	0.0170519	0.0183201	0.0120761	0.016078	0.0311951	0.0231459	0.0183812	0.0192642	0.0111705	0.0184337	0.0138166	0.0165639	0.0250242	0.0273004	0.033541	0.0134623	0.0389964	0.0216661	0.0269236	0.0335851	0.0136779	0.020644	0.00244209	0.0185584	0.0224495	0.0286349	0.0136205	0	0	0.0145323	0.0125881	0.0170783	0.0193224	0.0117319	0.0239471	0.0194762	0.0429503	0.0158887	0.0196722	0.0356855	0.0182069	0.0165142	0.0134381	0.0197852	0.0458467	0.0260812
Gm17090	0	0	0	0	0	0	0	0	0	0	0	0	0	0	0	0	0	0	0	0	0	0	0.00321295	0	0	0	0	0	0.0022686	0	0	0	0	0	0	0	0	0	0	0	0	0	0	0	0	0	0	0.00503085	0
Espnl	0	0	0	0	0	0	0	0	0	0	0	0	0	0	0	0	0	0	0	0	0	0	0.00208452	0	0	0	0.00159907	0.00133315	0	0	0	0	0	0	0	0	0	0	0	0	0	0	0	0	0	0	0	0	0
Klhl30	0	0	0.0176194	0.0094269	0.00898336	0	0	0.00127591	0	0	0	0	0.0101343	0.00709587	0	0	0.00254245	0	0	0	0.00348333	0	0.0131155	0	0.00105834	0	0	0.0136613	0.00274743	0	0	0	0.000729416	0	0	0	0	0.0207036	0.00437948	0.00338277	0	0	0	0	0	0.00212981	0	0.0188394	0
Erfe	0	0	0.00168283	0.000501863	0.000863373	0	0.00279185	0	0	0	0	0.00732995	0.00662172	0	0	0.00121136	0	0	0.00455996	0	0.0024517	0.00896203	0.0209902	0.0163638	0.00577846	0.00636495	0.0141165	0.0243772	0.00744731	0.00435702	0	0	0.00236122	0	0	0	0.00547347	0.026512	0.0022983	0.0104252	0.00128265	0	0.0067051	0	0	0	0.00220424	0.0100409	0.010189
Ilkap	0.765488	0.937402	1.18481	0.97159	1.3116	0.650106	0.7439	0.835023	0.699442	0.7588	0.532589	0.704571	1.22878	0.978092	1.03254	0.673251	0.673061	0.776654	0.575008	0.735371	0.791	0.820137	0.808186	0.766076	0.855444	0.720269	0.733663	0.803732	0.731279	0.971268	3.28758	1.70872	1.73413	1.70949	1.76031	0.795404	0.802438	0.792082	0.793421	0.883971	0.632082	0.768005	0.706328	0.635607	0.662253	0.72788	0.837174	0.837296	0.755083
1700020N18Rik	0	0	0	0	0	0	0	0	0	0	0	0	0	0	0	0	0	0	0	0	0	0	0	0	0	0	0	0	0	0	0	0	0	0	0	0	0	0	0	0	0	0	0	0	0	0	0	0	0
Hes6	0.301982	0.207739	0.304733	0.324057	0.388074	0.172872	0.133287	0.189149	0.180165	0.135602	0.21285	0.127943	0.183784	0.168047	0.214313	0.194881	0.179899	0.210187	0.171326	0.17447	0.151079	0.145578	0.14524	0.114864	0.155022	0.112708	0.120123	0.117416	0.138538	0.116966	0	0.304193	0.322434	0.241037	0.329959	0.122342	0.151098	0.142031	0.173657	0.197508	0.178165	0.165537	0.282498	0.141282	0.155823	0.14048	0.141187	0.160079	0.177016
Per2	0.0605923	0.066093	0.0256128	0.0581434	0.0741924	0.0338147	0.054629	0.047314	0.0631322	0.0332153	0.0175526	0.0236969	0.0189782	0.0269113	0.0308306	0.0575089	0.0702426	0.122346	0.117396	0.0795595	0.016731	0.0295186	0.0165716	0.0104642	0.0176415	0.026656	0.0314183	0.0159297	0.0287082	0.0346257	0	0	0.00787676	0.0214598	0.00896656	0	0.00477441	0.007432	0.0296705	0.0272739	0.0267293	0.0593228	0.0596321	0.076754	0.0492341	0.0323376	0.0539563	0.0604464	0.0354296
Gm28382	0	0	0	0	0	0	0	0	0	0	0	0	0	0	0	0	0	0	0	0	0	0	0	0	0	0	0	0	0	0	0	0	0	0	0	0	0	0	0	0	0	0	0	0	0	0	0	0	0
Traf3ip1	0.129785	0.209235	0.0972931	0.167674	0.183588	0.197821	0.214626	0.171776	0.147545	0.221341	0.159765	0.137148	0.0826455	0.103214	0.131108	0.180736	0.227317	0.193004	0.20947	0.186674	0.182787	0.17752	0.133425	0.168746	0.192594	0.156144	0.143758	0.112019	0.156318	0.166501	0	0.167115	0.0862325	0.119978	0.132184	0.165158	0.130638	0.10466	0.132774	0.11775	0.173482	0.237472	0.184015	0.262888	0.108418	0.220448	0.24996	0.268564	0.192999
Asb1	0.0125768	0	0.030252	0.0312878	0.0491429	0.0182258	0.0190386	0.025496	0.0126112	0.0262107	0.0278031	0.0104363	0.0291748	0.0513529	0.0320919	0.0189317	0.0341823	0.0296583	0.00910312	0.0536398	0.0130125	0.028989	0.021039	0.0229919	0.0311614	0.0211312	0.00826543	0.0139238	0.018304	0.0251925	0	0.157568	0.0471096	0.0288622	0.062463	0.0110602	0.0250527	0.026695	0.0282953	0.0298095	0.0105766	0.0127239	0.0316385	0.00438421	0.0091141	0.00408496	0.0185516	0.00896488	0.0391246
Gm28380	0	0	0	0	0	0	0	0	0	0	0	0	0	0	0	0	0	0	0	0	0	0	0	0	0	0	0	0	0	0	0	0	0	0	0	0	0	0	0	0	0	0	0	0	0	0	0	0	0
Gm29100	0	0	0	0.00140936	0	0	0	0	0	0	0	0	0	0	0	0	0	0	0	0	0	0	0	0	0	0	0	0	0	0	0	0	0	0	0	0	0	0	0	0	0	0	0	0	0	0	0	0	0
Twist2	0.025689	0	0.0018017	0.00192774	0.0207124	0.000822147	0	0	0	0.00125722	0	0	0	0.00197853	0.012324	0	0	0	0	0	0.00383158	0.00186626	0.00208538	0.00914893	0.010514	0.00216141	0.0063869	0.00314183	0.00697327	0.0136888	0	0	0	0	0	0	0.00528703	0.00886515	0	0.0138199	0.00525614	0	0	0	0	0	0	0	0
Hdac4	0.683272	0.840939	0.336067	0.376405	0.473722	1.31779	1.15298	0.610579	0.808795	0.983876	1.47243	0.866413	0.400279	0.447775	0.555622	1.30622	1.28131	0.728372	0.93558	1.12253	1.06274	0.666285	0.382558	0.497878	0.587037	0.875637	0.476176	0.464465	0.462313	0.536649	0	0.825597	0.403717	0.477188	0.508912	1.10613	0.647363	0.363299	0.413717	0.486638	1.2342	1.29266	0.777407	1.18437	1.08275	1.12688	1.05974	0.552845	0.772426
Gm26720	0	0.0572765	0.0178997	0.0158515	0.0124255	0.0302904	0.064719	0.062872	0.0282928	0.0305729	0.0249312	0.0593386	0.0212934	0.0289249	0.00971109	0.0244604	0.080889	0.051153	0.065966	0.031485	0.0302579	0.0348457	0.0144118	0.0470138	0.0291828	0.0193446	0.0394599	0.020406	0.0108261	0.00857785	0	0	0.0171405	0.0285112	0.0113784	0.0526549	0.0444216	0.0160738	0.0229629	0.00665817	0.0234649	0.080297	0.0502104	0.0403232	0.071516	0.021665	0.0429476	0.0562743	0.0411037
Gm29099	0	0	0	0	0	0.000905379	0	0	0	0	0	0	0	0	0	0	0	0	0	0	0	0	0	0	0	0	0	0	0	0	0	0	0	0	0	0	0	0	0	0	0	0	0	0	0	0	0	0	0
Ndufa10	1.61495	1.77715	1.70842	1.54765	1.61599	1.73703	1.81652	1.9323	1.6548	1.6233	1.84719	2.15087	1.94189	1.48173	1.64975	1.58015	1.60753	1.70878	1.43068	1.48591	1.79615	2.57405	2.70229	2.15679	2.09269	1.74994	2.68448	2.36791	2.03348	2.07747	1.64379	1.98991	1.60408	1.39136	1.37878	1.89613	2.6069	2.49862	1.84525	2.03633	1.57497	1.77626	1.78336	1.42165	1.61741	1.64522	1.96146	2.27795	1.75253
Olfr1416	0	0	0	0	0	0	0	0	0	0.00304449	0	0	0	0	0	0	0	0	0	0	0	0	0	0	0	0	0	0	0	0	0	0	0	0	0	0	0	0.00128199	0	0	0	0	0	0	0	0	0	0	0
Olfr1415	0	0	0	0	0	0	0	0	0	0	0	0	0	0	0	0	0	0	0	0	0	0	0	0	0	0	0	0	0	0	0	0	0	0	0	0	0	0	0	0	0	0	0	0	0	0	0	0	0
Olfr1414	0	0	0	0	0	0	0	0	0	0	0	0	0	0	0	0	0	0	0	0	0	0	0	0	0	0	0	0	0	0	0	0	0	0	0	0	0	0	0	0	0	0	0	0	0	0	0	0	0
Olfr1413	0	0	0	0	0	0	0	0	0	0	0	0	0	0	0	0	0	0	0	0	0	0	0	0	0	0	0	0	0	0	0	0	0	0	0	0	0	0	0	0	0	0	0	0	0	0	0	0	0
1700054K02Rik	0	0	0	0	0	0	0	0	0	0	0	0	0	0	0	0	0	0	0	0	0	0	0	0	0	0	0	0	0	0	0	0	0	0	0	0	0	0	0	0	0	0	0	0	0	0	0	0	0
Olfr1412	0	0	0	0	0	0	0	0	0	0	0	0	0	0	0	0	0	0	0	0	0	0	0	0	0	0	0	0	0	0	0	0	0	0	0	0	0	0	0	0	0	0	0	0	0	0	0	0	0
Olfr1411	0	0	0	0	0	0	0	0	0	0	0	0	0	0	0	0	0	0	0	0	0	0	0	0	0	0	0	0	0	0	0	0	0	0	0	0	0	0	0	0	0	0	0	0	0	0	0	0	0
Olfr1410	0	0	0	0	0	0	0	0	0	0	0	0	0	0	0	0	0	0	0	0	0	0	0	0	0	0	0	0	0	0	0	0	0	0	0	0	0	0	0	0	0	0	0	0	0	0	0	0	0
Olfr12	0	0	0	0	0	0	0	0	0	0	0	0	0	0	0	0	0	0	0	0	0	0	0	0	0	0	0	0	0	0	0	0	0	0	0	0	0	0	0	0	0	0	0	0	0	0	0	0	0
Cops9	1.22829	1.29583	1.34152	1.12383	1.5251	1.14675	1.16372	1.18252	0.909778	1.15765	1.35761	1.23097	1.41143	1.22182	1.39187	1.10428	1.15679	0.957254	0.838881	1.13023	1.18878	1.39059	1.5758	1.2085	1.52921	1.08189	1.38686	1.38804	1.21103	1.45285	1.64379	1.40698	1.40467	1.17835	1.50493	1.48713	1.50496	1.75149	1.57489	1.81523	1.16163	1.22734	1.07962	0.908293	1.21394	1.20341	1.12834	1.32733	0.946072
Otos	0	0	0	0	0	0	0	0	0	0	0	0	0	0	0	0	0	0	0	0	0	0	0	0	0	0	0	0	0	0	0	0	0	0	0	0	0	0	0	0	0	0	0	0	0	0	0	0	0
Gm29483	0	0	0	0	0	0	0	0	0	0	0	0	0	0	0	0	0	0	0	0	0	0	0	0	0	0	0	0	0	0	0	0	0	0	0	0	0	0	0	0	0	0	0	0	0	0	0	0	0
Gm29482	0	0	0	0	0	0	0	0	0	0	0	0	0	0	0	0	0	0	0	0	0	0	0	0	0	0	0	0	0	0	0	0	0	0	0	0	0	0	0	0	0	0	0	0	0	0	0	0	0
Gm29481	0	0	0	0	0	0	0	0	0	0	0	0	0	0	0	0	0	0	0	0	0	0	0	0	0	0	0	0	0	0	0	0	0	0	0	0	0	0	0	0	0	0	0	0	0	0	0	0	0.00385765
Gpc1	0.0885374	0.258052	0.141771	0.119668	0.0974876	0.0306429	0.0849036	0.0784542	0.0490689	0.0420084	0.0353266	0.113284	0.0405172	0.0718505	0.0476857	0.0263043	0.0700954	0.097412	0.064422	0.0545758	0.0460237	0.180197	0.0983662	0.0453219	0.0600862	0.05291	0.119597	0.0711685	0.0335727	0.0636044	0	0.0935769	0.070601	0.0580878	0.0509833	0.0591556	0.10476	0.0189964	0.0248633	0.0383499	0.0325756	0.0589981	0.0801664	0.0651226	0.0434904	0.0445656	0.10669	0.116726	0.059572
Gm29480	0	0	0	0.00146617	0	0	0.00147906	0	0	0.0012324	0	0	0.00187418	0	0.00156423	0.0015027	0.00239687	0	0	0	0	0	0	0	0	0	0	0.000881491	0	0	0	0	0	0.00213942	0	0	0	0	0	0.00236539	0	0	0	0	0	0	0	0	0
Ankmy1	0.0227095	0.0106756	0.0129778	0.0115274	0.00947455	0.004294	0.0112941	0.00267691	0	0.00847462	0.0127993	0.0078416	0.000830013	0.00853091	0.00194816	0.00532778	0.00387378	0.0089197	0.0180122	0.00250419	0.0071407	0.00683092	0.00230222	0.00653407	0.0104404	0	0.0014978	0.00662784	0.00172472	0.0064147	0	0	0	0.0101207	0.0128601	0	0.0321525	0.00215682	0	0	0.00365684	0.00926016	0	0.0067347	0.00316252	0.00506531	0.0172077	0.00892453	0.00565885
Dusp28	0.111183	0.129516	0.0324303	0.0541722	0.0453704	0.0604281	0.0656567	0.0809757	0.0716752	0.0694135	0.0775418	0.054209	0.0394074	0.0476715	0.0579917	0.0940469	0.0910837	0.049582	0.107522	0.0742237	0.127648	0.10962	0.0852002	0.056714	0.104296	0.109308	0.0470578	0.0392907	0.0510896	0.0434147	0	0.0786262	0.0380892	0.0350621	0.0452462	0.0823026	0.0778552	0.0562567	0.0471636	0.0494959	0.0721017	0.1062	0.0576247	0.093326	0.0379521	0.0875241	0.0867839	0.118346	0.0845063
5033417F24Rik	0	0	0.00117316	0.00418923	0.00270488	0.000962502	0.00177867	0	0	0	0.00462158	0	0.00113719	0	0.00312414	0.00177486	0.00862354	0	0.00652243	0.0050766	0.00214198	0	0.00318954	0	0.0006102	0.00231684	0.00290406	0.00141029	0.00239936	0.00769038	0	0	0	0.00522505	0.00297813	0	0.00492737	0.00443132	0.00310868	0.00201232	0	0	0	0	0.00393013	0.00170646	0.00183732	0	0
Rnpepl1	0.313854	0.402579	0.380318	0.290697	0.285249	0.316093	0.338334	0.332789	0.284602	0.299661	0.265007	0.393361	0.368378	0.282401	0.345787	0.313997	0.36136	0.390775	0.22786	0.295456	0.348656	0.346341	0.369627	0.279333	0.289818	0.35041	0.335692	0.326907	0.269718	0.305728	0	0.592807	0.448509	0.376633	0.386738	0.295914	0.531513	0.369127	0.27413	0.335932	0.344734	0.289434	0.211564	0.235382	0.254585	0.295945	0.342166	0.309028	0.297532
9430060I03Rik	0.0398691	0.0131906	0.00804248	0.0118087	0.0355634	0.00492266	0.0069287	0.0100279	0.00375591	0.0192364	0.0079397	0.00138957	0.0108369	0.00979407	0.0166281	0.00967305	0.00346717	0.0163417	0	0.0202854	0.00311297	0.0145586	0.00522646	0.0165592	0.00927897	0.00523234	0.0145262	0.0088682	0.0244667	0.0144478	0	0	0.0186585	0.0193888	0.0185889	0.0246489	0.0124062	0.00367791	0.012903	0.0168685	0.0029446	0.00678476	0.00951665	0	0.00710877	0.0112082	0.00241774	0.00433156	0.0103637
Capn10	0.0943946	0.107057	0.0548119	0.103279	0.138858	0.0915723	0.0538154	0.0635661	0.0491427	0.115698	0.161612	0.0670444	0.0656389	0.0714893	0.138258	0.120283	0.0579786	0.0840379	0.0846529	0.13979	0.072672	0.0836452	0.0967472	0.0911643	0.157091	0.150959	0.0773401	0.0714658	0.116547	0.1592	0	0	0.0578181	0.121668	0.144247	0.0712825	0.123652	0.0749406	0.150582	0.179314	0.115258	0.0872344	0.0855494	0.086103	0.111716	0.103596	0.0976128	0.0709446	0.0846095
Gpr35	0	0	0.00287012	0.0022907	0.00411945	0.0019252	0.00204908	0	0	0	0	0.00165344	0	0	0.0020162	0.00182643	0	0.0100792	0	0.00928659	0	0	0	0	0.000788594	0.0024189	0.00365346	0	0	0	0	0	0.00153962	0.00156783	0	0	0	0	0.00405739	0	0.0045942	0	0.0067051	0	0	0.00496791	0.00332534	0	0
Aqp12	0.0472412	0.0407568	0.000601079	0	0.000746072	0.124293	0.143513	0.0725546	0.0593816	0.0305741	0.0193363	0.0146413	0.00344716	0.00402175	0.00143546	0.233071	0.318619	0.15711	0.225414	0.224455	0.121033	0.071242	0.0272206	0.0209268	0.0205088	0.170399	0.0739514	0.0156044	0.014689	0.0138163	0	0	0	0	0	0.0392184	0.0112098	0	0	0.00406097	0.212924	0.298612	0.164799	0.183212	0.18046	0.15198	0.201093	0.126635	0.118147
Kif1a	0.214816	0.160203	0.0319197	0.0300611	0.0278096	0.137589	0.0866153	0.0593124	0.0356719	0.0306139	0.0816642	0.0339426	0.00519819	0.00654881	0.0047547	0.208307	0.244095	0.17637	0.115419	0.0634943	0.118038	0.0749769	0.0199086	0.0191378	0.0278059	0.10501	0.0376271	0.013691	0.0151733	0.0214654	0	0	0.0108989	0.0136668	0.00677026	0.089837	0.0651481	0.00252935	0.0206335	0.0139225	0.16727	0.179862	0.147194	0.0839205	0.0918838	0.124623	0.112782	0.0753093	0.0482477
Gm28086	0	0	0	0	0.00094377	0.0041219	0.00129663	0.00211325	0.00454457	0	0.00244695	0	0	0	0	0.0116739	0.00633059	0.00614831	0	0	0.0062873	0	0.00201553	0	0.00138504	0.00525837	0	0.00072727	0	0.000951361	0	0	0	0	0	0	0	0	0.00290212	0	0.00300835	0.00337322	0.0164563	0	0.0100747	0.0042773	0.0104078	0.0103399	0.0180087
Agxt	0	0	0	0	0	0.000863913	0	0	0	0	0	0	0	0	0	0	0	0	0	0	0	0	0	0	0	0	0	0	0	0	0	0	0	0	0	0	0	0	0	0.00177985	0	0	0	0	0	0.00142817	0	0	0
2310007B03Rik	0	0	0	0	0	0	0	0	0	0	0	0	0	0	0	0	0	0	0	0	0	0.00207328	0	0	0	0	0	0	0	0	0	0	0	0	0	0	0	0	0	0	0.00322874	0	0	0	0	0	0	0	0
Crocc2	0	0.0127934	0	0.00119396	0.00270015	0.0120794	0.00444987	0	0.0153651	0.00744871	0.00255356	0	0	0	0	0.0205701	0.00244403	0	0.0111341	0.0126677	0.00748736	0.004004	0.00145114	0	0.000886731	0.00568355	0.0087748	0	0	0	0	0	0.000917016	0	0	0.0301552	0	0	0	0.0018067	0.00862925	0.0179954	0	0.0132018	0.00887562	0.00324469	0.00393014	0	0.0224312
Sned1	0.655729	0.580963	0.198506	0.306904	0.387346	0.76628	0.751369	0.628486	0.911657	0.828441	0.765665	0.587012	0.196591	0.281567	0.246585	0.654229	0.610859	0.539034	0.735544	0.876519	0.569784	0.474329	0.344163	0.424609	0.486772	0.506379	0.38911	0.270005	0.393138	0.361933	1.64379	0.258364	0.076858	0.151389	0.140881	0.597911	0.46651	0.226342	0.23243	0.282961	0.55869	0.546084	0.272788	0.580482	0.634976	0.610302	0.596152	0.454718	0.884382
Mterf4	0.198303	0.216087	0.19632	0.17643	0.185063	0.178453	0.163664	0.162442	0.162929	0.198474	0.142241	0.142502	0.177987	0.18249	0.203237	0.185353	0.158862	0.159267	0.120551	0.209038	0.151404	0.143216	0.170862	0.153906	0.187158	0.148172	0.160932	0.188085	0.179038	0.238082	0	0.512121	0.192003	0.142995	0.229259	0.0728823	0.249122	0.174999	0.218766	0.210609	0.212613	0.188261	0.145701	0.214465	0.284838	0.153778	0.182318	0.124248	0.107644
Gm28535	0	0	0.00315695	0.0104218	0.00754284	0.00680632	0.00715218	0	0.0180775	0.00874935	0.00840595	0.00291783	0.00372842	0.00491763	0.0030565	0.013291	0.00614343	0	0.00421258	0.0114775	0.00196041	0.00540446	0.00502697	0.00192901	0.0104334	0	0.0084619	0.00343073	0.00330439	0.00424407	0	0	0.00799539	0.0116406	0.00772667	0.0156722	0.0175789	0.00763632	0.0139235	0.00560596	0.00862268	0.00865117	0.00902319	0	0.00530462	0.00358396	0.0020803	0.00558929	0.0112713
Pask	0	0	0.00175637	0.00399049	0.00726788	0.0107858	0.00873137	0.00504742	0.0171389	0.00923564	0.00711911	0.0118471	0.000954082	0.00753284	0.00876837	0.00649365	0.00394931	0.0147673	0.00619393	0.00720681	0.170425	0.0838334	0.062091	0.112905	0.110228	0.0772202	0.0718996	0.0493182	0.0471605	0.071726	0	0	0.00300692	0.00602144	0.00324322	0	0.0242964	0.00546512	0.00724179	0.00778384	0.00515963	0.00189555	0.0144323	0.00670593	0.0145108	0.0554205	0.0310225	0.087093	0.0650604
Ppp1r7	0.33951	0.240755	0.440273	0.485547	0.481137	0.427137	0.371419	0.392478	0.416251	0.413984	0.421037	0.2813	0.360129	0.3852	0.411755	0.448279	0.339522	0.474959	0.415068	0.387313	0.610058	0.546438	0.511505	0.534667	0.53126	0.569749	0.485224	0.453521	0.596793	0.494131	0.821895	0.512626	0.326248	0.302176	0.363332	0.427261	0.330601	0.449623	0.421831	0.424417	0.469153	0.439441	0.401419	0.384865	0.489577	0.523904	0.541221	0.474855	0.431409
Ano7	0	0	0.00150717	0.00150653	0.00199527	0	0	0	0.00466418	0	0	0	0	0.00284039	0.00365911	0.00122562	0.00363803	0	0	0	0	0	0	0	0.00100471	0	0	0.00185492	0	0.00142477	0	0	0	0	0.00252587	0	0	0	0.00179758	0.00561937	0	0	0	0	0	0.00206835	0	0	0.00657641
Hdlbp	2.59243	3.36985	3.50875	2.89068	2.82789	2.74978	3.93554	3.5336	2.70647	2.57643	3.21642	4.68936	4.50934	3.73149	3.65047	2.37036	3.4652	3.2426	2.30551	1.81179	3.06528	4.88813	4.58966	3.78095	3.53888	2.27128	3.83549	3.78512	3.01538	2.77174	2.46569	3.61494	3.76631	3.0493	3.082	3.15759	4.78479	4.95037	3.73391	3.87047	2.39468	3.45983	3.05954	2.4236	2.11986	2.58392	3.95895	3.63332	2.87375
Sept2	0.175939	0.148429	0.0997396	0.139651	0.117365	0.130181	0.138129	0.108133	0.124681	0.10555	0.0774152	0.109684	0.100293	0.121239	0.126816	0.1074	0.122632	0.0998239	0.151528	0.1465	0.135354	0.0752518	0.0835559	0.14446	0.106627	0.119012	0.0889461	0.0719718	0.11616	0.107814	0	0.0535424	0.144779	0.218704	0.160855	0.10821	0.0924947	0.0962891	0.0870783	0.0991442	0.111445	0.156529	0.155857	0.189837	0.158129	0.141859	0.134353	0.138667	0.11609
Sept2.1	0	0	0	0	0	0	0	0	0	0	0	0	0	0	0	0	0	0	0	0	0	0	0	0	0	0	0	0	0	0	0	0	0	0	0	0	0	0	0	0	0	0	0	0	0	0	0	0	0
Farp2	0.034132	0.0452158	0.063682	0.0742414	0.0584191	0.0314497	0.0466408	0.0954373	0.084449	0.0782505	0.0319598	0.0559341	0.0680239	0.0669654	0.0873364	0.0330647	0.0594896	0.0902774	0.0819226	0.0396587	0.0215527	0.0512869	0.0514301	0.0611781	0.0562021	0.0281575	0.0397248	0.0411884	0.0501771	0.0600121	0	0.373285	0.0372231	0.0763835	0.0677481	0.0368123	0.0943352	0.0549004	0.0653939	0.0613033	0.039144	0.0385351	0.112778	0.0379763	0.0394318	0.0379447	0.0683641	0.118343	0.130248
Stk25	0.536793	0.213309	0.318848	0.53827	0.564708	0.482246	0.26959	0.295103	0.408626	0.391774	0.486536	0.242211	0.291319	0.528234	0.52027	0.471867	0.313393	0.22839	0.480415	0.457585	0.471747	0.242474	0.238004	0.43348	0.477947	0.481042	0.288194	0.279538	0.516316	0.48323	0.821895	0.473194	0.330363	0.644316	0.600281	0.437515	0.295405	0.310525	0.515433	0.530231	0.481486	0.242137	0.255511	0.33316	0.398812	0.487048	0.251775	0.184639	0.379925
Gm28536	0	0	0	0	0	0.000676102	0.00141834	0	0	0	0	0	0	0	0	0	0	0	0	0	0	0	0.00161568	0.00184674	0	0	0	0	0.00132164	0	0	0	0	0	0	0	0	0.00319687	0	0	0	0	0	0	0	0	0	0	0
Bok	0.391595	0.554751	1.28236	0.937716	0.610105	0.545446	0.704136	1.0415	0.847671	1.07755	0.322892	0.478874	1.04559	0.746997	0.77671	0.460086	0.552353	0.929631	0.519417	0.929877	0.900535	1.25863	1.57417	1.45092	1.40317	0.97686	1.25033	1.24121	1.45479	1.12092	0	0.274634	0.638827	0.423306	0.33938	0.455319	1.46902	1.6364	1.32591	1.194	0.895305	0.936231	1.25185	1.01626	1.22333	1.01786	1.0582	1.37684	1.17646
Thap4	0.388127	0.252041	0.27613	0.209384	0.213734	0.335112	0.296301	0.326958	0.23802	0.283138	0.311678	0.233692	0.251531	0.206003	0.227793	0.370353	0.314387	0.368684	0.253901	0.296823	0.342285	0.307505	0.32053	0.225605	0.242647	0.431631	0.363731	0.350152	0.278553	0.313481	0	0.362343	0.270834	0.200181	0.203194	0.314369	0.325203	0.280698	0.218842	0.307568	0.402631	0.390002	0.328028	0.275418	0.298344	0.348729	0.292429	0.243845	0.203909
Gm10550	0.0117839	0	0	0.00189974	0.000433353	0	0	0	0.00504569	0	0	0	0	0	0	0	0	0	0	0	0	0.00163761	0	0	0.000571359	0	0	0.000985836	0	0.00130092	0	0	0	0	0	0	0	0	0	0.00425921	0.00154822	0.00330789	0	0	0.00323836	0	0	0	0
Atg4b	0.238243	0.276896	0.315937	0.290799	0.293988	0.266672	0.235538	0.314109	0.204741	0.234239	0.193319	0.265433	0.291207	0.169064	0.308819	0.267402	0.210595	0.304322	0.240912	0.318234	0.222266	0.271744	0.30308	0.260557	0.263243	0.283197	0.353138	0.332341	0.307607	0.339128	0	0.474978	0.278935	0.316144	0.260347	0.165816	0.319434	0.290059	0.257542	0.28426	0.277408	0.271929	0.402862	0.192902	0.185523	0.261685	0.26695	0.267916	0.281463
Dtymk	0.79856	0.737228	0.873202	1.01378	1.10727	0.965879	0.930416	0.903328	1.06527	1.13959	1.05719	1.0093	0.957904	1.17571	1.3359	0.81449	0.73919	0.733793	0.839135	0.903932	2.38194	2.21373	2.02393	2.63748	2.36542	1.78079	1.91644	1.66136	2.24392	2.38106	2.46569	0.812836	0.755385	0.833598	0.92778	1.52709	1.56073	1.52669	1.73756	1.58528	0.834639	0.659326	0.63159	0.91054	0.996578	1.5481	1.3766	1.53068	1.86645
Ing5	0.479213	0.635301	0.371131	0.450833	0.406426	0.458138	0.625147	0.521162	0.584425	0.509016	0.425728	0.560028	0.498745	0.482873	0.536126	0.433885	0.604004	0.521837	0.535126	0.50733	0.458237	0.543453	0.453595	0.524734	0.493093	0.41115	0.536791	0.600386	0.387688	0.46922	0.821895	2.02983	0.612945	0.432068	0.511055	0.431703	0.405699	0.396004	0.430344	0.454147	0.419499	0.63266	0.390663	0.505251	0.474595	0.519141	0.532352	0.468654	0.46386
D2hgdh	0.0746786	0.0980931	0.0762192	0.0565378	0.0796488	0.0990946	0.105228	0.0986574	0.0781587	0.0876437	0.131949	0.0826001	0.10655	0.0718118	0.103778	0.103948	0.102558	0.106093	0.077996	0.139382	0.068607	0.074057	0.0771117	0.0799314	0.0774427	0.0944028	0.0838426	0.122322	0.080524	0.090171	0	0.125481	0.0784794	0.0595148	0.0600933	0.0756869	0.0642098	0.0859694	0.055254	0.102553	0.105019	0.11	0.145519	0.110531	0.101594	0.0757068	0.0931702	0.0817208	0.123178
Gal3st2	0	0	0	0	0	0	0	0	0	0	0	0	0	0	0	0	0.00310359	0	0	0	0.00214198	0	0	0	0	0	0	0	0	0	0	0	0	0	0	0	0	0	0	0	0	0	0	0	0	0	0	0	0
Gal3st2b	0	0	0	0	0	0	0	0	0	0	0	0	0	0	0	0	0	0	0	0	0	0	0	0	0	0	0	0	0	0	0	0	0	0	0	0	0	0	0	0	0	0	0	0	0	0	0	0	0
Gal3st2c	0	0	0.00249026	0.00489253	0	0	0	0	0	0	0	0	0.00299937	0.00340758	0.00129796	0.00113109	0	0	0	0	0	0	0.00897695	0	0.000607772	0	0.00153915	0.00118642	0.0031089	0	0	0	0	0	0.00234694	0	0	0.000985995	0.0022983	0.0017677	0	0	0	0	0	0	0	0	0
Neu4	0	0	0	0	0	0	0	0	0	0	0	0	0	0	0	0	0	0	0	0	0	0	0	0	0	0	0	0.000575574	0	0	0	0	0	0	0	0	0	0	0	0	0	0	0	0	0	0	0	0	0
Pdcd1	0	0	0.00975719	0.00402358	0	0	0	0	0	0	0	0	0	0.00396209	0.00231335	0	0	0	0	0	0	0.00153063	0.00228289	0	0	0.00278155	0	0.000654403	0.00972134	0	0	0	0	0	0	0	0	0.000786775	0.0022983	0	0	0	0	0	0	0	0	0	0
4930440C22Rik	0	0	0	0	0	0	0	0	0	0	0	0	0	0	0	0	0	0	0	0	0	0	0	0	0	0	0	0	0	0	0	0	0	0	0	0	0	0	0	0	0	0	0	0	0	0	0	0	0
Fam174a	0.643363	0.326416	0.216644	0.407967	0.439769	0.389939	0.261673	0.236603	0.353102	0.337728	0.425831	0.221205	0.24583	0.338257	0.478894	0.406503	0.241052	0.23851	0.363136	0.587191	0.358154	0.211763	0.219796	0.336258	0.375257	0.323548	0.185823	0.176161	0.32542	0.306296	0	0.0961686	0.253416	0.381651	0.498436	0.390342	0.193412	0.209473	0.396951	0.361075	0.31826	0.254341	0.340883	0.291926	0.415932	0.391398	0.279558	0.234189	0.331977
St8sia4	0	0	0.000744799	0	0.00316714	0.00188207	0.00421102	0.00237012	0.00339149	0	0	0	0.00322018	0	0.00180947	0.0011674	0	0	0	0.00357807	0	0	0	0.0139671	0.00146821	0	0.0112045	0	0	0.00742023	0	0	0.00229954	0.00275073	0.0104995	0	0.00493052	0.00245358	0.00391899	0	0.00087031	0	0.00785337	0	0.00277471	0.0105872	0.00242641	0	0
4930598F16Rik	0	0	0	0	0	0	0	0	0	0	0	0	0	0	0	0	0	0	0	0	0	0	0	0	0	0	0	0	0	0	0	0	0	0	0	0	0	0	0	0	0	0	0	0	0	0	0	0	0
1700063A18Rik	0	0	0	0	0	0	0	0	0	0	0	0	0	0	0	0	0	0	0	0	0	0	0	0	0	0	0	0	0	0	0	0	0	0	0	0	0	0	0	0	0	0	0	0	0	0	0	0	0
Gm29601	0	0	0	0	0	0	0	0	0	0	0	0	0	0	0	0	0	0	0	0	0	0	0	0	0	0	0	0	0	0	0	0	0	0	0	0	0	0	0	0	0	0	0	0	0	0	0	0	0
4930533P14Rik	0	0	0	0	0	0	0	0	0	0	0	0	0	0	0	0	0	0	0	0	0	0	0	0	0	0	0	0	0	0	0	0	0	0	0	0	0	0	0	0	0	0	0	0	0	0	0	0	0
Slco4c1	0	0	0.000420121	0.000926763	0	0	0	0	0	0	0	0	0	0	0	0	0	0	0	0	0	0	0	0	0	0	0	0	0	0	0	0	0	0	0.0024828	0	0	0	0	0	0	0	0	0	0	0	0	0	0
Panct2	0	0	0.0013204	0	0.0017148	0	0	0	0	0	0	0	0	0	0	0	0	0	0	0	0.00182488	0	0	0	0	0	0	0	0	0	0	0	0	0	0	0	0	0	0	0	0	0	0	0	0	0	0	0	0
Gm28901	0	0	0	0.00175263	0.00179074	0	0	0	0	0	0	0	0	0	0	0	0.00125403	0	0.00550187	0	0	0	0	0	0.00109874	0	0	0	0	0	0	0	0	0	0	0	0	0.00111435	0	0	0	0	0	0	0	0.00136147	0.00206812	0	0
Slco6c1	0	0	0	0	0	0	0	0	0	0	0	0	0	0	0	0	0	0	0	0	0	0	0	0	0	0	0	0	0	0	0	0	0	0	0	0	0	0	0	0	0	0	0	0	0	0	0	0	0
D1Ertd622e	0.286693	0.261666	0.238351	0.225475	0.2304	0.240702	0.214496	0.218974	0.179041	0.152507	0.509572	0.325886	0.336553	0.376124	0.27304	0.179867	0.181038	0.150757	0.103605	0.104733	0.313062	0.293075	0.241495	0.270522	0.203231	0.191849	0.239139	0.227807	0.155941	0.171857	1.64379	0.291702	0.45582	0.447614	0.452477	0.475516	0.192372	0.191065	0.21299	0.184181	0.144483	0.0954777	0.15463	0.201419	0.0904532	0.172611	0.167309	0.207977	0.151507
Ppip5k2	0.458527	0.340985	0.25497	0.282941	0.263045	0.518712	0.410732	0.342215	0.454795	0.455501	0.324112	0.351175	0.260794	0.304742	0.305498	0.51525	0.490328	0.305743	0.52214	0.447977	0.437471	0.235473	0.211529	0.340247	0.277515	0.481642	0.329325	0.220631	0.282409	0.2255	0.821895	0.240427	0.345495	0.360523	0.368741	0.298233	0.297167	0.163426	0.250696	0.222904	0.564258	0.488879	0.418834	0.593637	0.46121	0.519893	0.353585	0.287033	0.423347
Gin1	0.211247	0.175851	0.131541	0.194001	0.177632	0.227011	0.133209	0.172927	0.210021	0.2221	0.213946	0.119647	0.091366	0.122363	0.175379	0.244375	0.167832	0.17978	0.240987	0.297591	0.163566	0.147537	0.141284	0.149841	0.191043	0.217457	0.156385	0.155122	0.18216	0.201524	0	0.0509954	0.104897	0.186435	0.152559	0.252989	0.205683	0.157225	0.181591	0.227347	0.245101	0.168267	0.190331	0.168809	0.228641	0.191515	0.164315	0.154111	0.216874
Pam	0.812143	0.801721	0.481304	0.457944	0.341792	0.470834	0.625105	0.825099	0.777687	0.540063	0.343491	0.461606	0.441769	0.453082	0.289435	0.494892	0.735994	0.918986	0.847517	0.453983	0.390264	0.381465	0.390441	0.22214	0.222109	0.430919	0.379265	0.338524	0.281859	0.223713	0.821895	0.312538	0.405143	0.400348	0.38592	0.350654	0.219675	0.298052	0.162054	0.175174	0.540474	0.675272	0.814935	0.66032	0.501643	0.480947	0.609194	0.817752	0.502046
1810006J02Rik	0	0	0	0	0	0	0	0	0	0	0	0	0	0	0	0	0	0	0	0	0	0	0	0	0	0	0	0	0	0	0	0	0	0	0	0	0	0	0	0	0	0	0	0	0	0	0	0	0
Gm29461	0	0	0	0	0	0	0	0	0	0	0	0	0	0	0	0	0	0	0	0	0	0	0	0	0	0	0	0	0	0	0	0	0	0	0	0	0	0	0	0	0	0	0	0	0	0	0	0	0
Slco6d1	0	0	0	0	0	0	0	0	0	0	0	0	0	0	0	0	0	0	0	0	0	0	0	0	0	0	0	0	0	0	0	0	0	0	0	0	0	0	0	0	0	0	0	0	0	0	0	0	0
Gm7967	0	0	0.00290073	0.00140723	0.00281064	0.000776921	0.00130877	0	0	0	0	0	0.00389718	0	0.00664789	0	0	0	0	0	0.00309797	0.00455329	0	0.00410286	0.00269587	0.00249154	0	0.00639033	0	0	0	0	0.00155396	0	0	0	0	0.00160905	0	0	0	0	0	0	0.00294118	0	0	0.0074136	0
Cntnap5b	0	0	0.00060805	0	0	0	0	0	0	0	0	0	0	0	0	0	0	0	0	0	0	0	0	0.00143322	0	0	0	0	0	0	0	0	0	0	0	0	0	0	0	0	0	0	0	0	0	0	0	0	0
Gm20268	0	0	0	0	0	0	0	0	0	0	0	0	0	0	0	0	0	0	0	0	0	0	0	0	0	0	0	0	0	0	0	0	0	0	0	0	0	0	0	0	0	0	0	0	0	0	0	0	0
Gm28187	0	0.0520971	0.0203677	0.0534771	0.0396529	0.0221669	0.0195935	0.0335504	0.0285016	0.0261652	0.0363502	0.0196448	0.0210905	0.0383746	0.044933	0.0202233	0.0154779	0.0153904	0.0194321	0.0234691	0.0286583	0.0169078	0.0260737	0.0310402	0.0200657	0.0132843	0.0109471	0.0149769	0.0215725	0.0178862	0	0	0.0239964	0.0497729	0.052832	0.017276	0.0097923	0.0220819	0.0181	0.0201133	0.0195585	0.014417	0.0471261	0.014143	0.0196991	0.0235898	0.0243648	0.0042736	0.0303299
Cdh20	0	0	0	0	0	0	0	0	0	0	0	0	0	0	0	0	0	0	0	0	0	0	0	0	0	0	0	0	0	0	0	0	0	0	0	0.00749209	0	0	0	0	0	0	0	0	0	0	0	0.00411987	0
Gm15699	0	0	0	0	0	0	0	0	0	0	0	0	0	0	0	0	0	0	0	0	0	0	0	0	0	0	0	0	0	0	0	0	0	0	0	0	0	0	0	0	0	0	0	0	0	0	0	0	0
Gm29012	0	0	0	0	0	0	0	0	0	0	0	0	0	0	0	0	0	0	0	0	0	0	0	0	0	0	0	0	0	0	0	0	0	0	0	0	0	0	0	0	0	0	0	0	0	0	0	0	0
Rnf152	0.00962256	0	0.00939906	0.0172638	0.0101822	0.00723764	0.0131218	0	0	0.00359564	0	0.00544405	0.0156961	0.0214397	0.00198068	0.0199375	0.019942	0.0145019	0.0226832	0.00330811	0.006216	0.00447095	0.00620988	0.00228987	0.00256094	0.00789528	0.00877207	0.0122206	0.0031146	0.00598607	0	0.0522488	0.021157	0.00802783	0.0137181	0	0.00621121	0.00282512	0	0.00321122	0.0108358	0.0150785	0.0374301	0.00821916	0.00995011	0.0150419	0.0054974	0.017637	0.00859448
Gm17634	0	0	0.00197561	0	0	0	0	0	0	0	0	0	0	0	0	0.00108473	0	0	0	0	0	0	0	0	0	0	0	0.00303854	0	0.000948074	0	0	0	0	0	0	0	0	0	0	0.00198045	0	0	0	0.00441072	0	0	0	0
Pign	0.189941	0.18068	0.129862	0.165568	0.186635	0.153648	0.145206	0.120888	0.230753	0.148	0.145147	0.110529	0.107981	0.127349	0.110231	0.157238	0.160381	0.166541	0.162817	0.251964	0.105051	0.082802	0.0918559	0.0948443	0.122111	0.190208	0.118563	0.134255	0.170784	0.141792	0	0	0.102743	0.146487	0.160916	0.0869433	0.0776458	0.106211	0.0822423	0.12549	0.155576	0.133323	0.174378	0.172884	0.1726	0.143361	0.149205	0.15167	0.107904
2310035C23Rik	0.235165	0.203805	0.167756	0.243475	0.218331	0.238551	0.196809	0.178594	0.241857	0.267142	0.151083	0.174716	0.204328	0.199216	0.253523	0.274039	0.254326	0.216625	0.232195	0.210565	0.196614	0.134173	0.14598	0.16986	0.20464	0.204246	0.129842	0.153596	0.198203	0.218133	0.821895	0.222583	0.236643	0.297217	0.268319	0.217821	0.199996	0.146279	0.158376	0.224874	0.260392	0.227606	0.212245	0.230957	0.262096	0.176526	0.193011	0.189728	0.21683
Tnfrsf11a	0	0	0.00100546	0.000767377	0	0	0	0	0	0.00275999	0	0	0	0	0	0	0	0	0	0	0	0	0	0	0.00111461	0	0	0	0	0.00281558	0	0	0	0	0	0	0	0	0	0	0	0	0	0	0	0	0	0.00246806	0
Gm7160	0.0387072	0	0.00702997	0.00302216	0.00305341	0.00271453	0.00329765	0	0.00348487	0.0032444	0.00773782	0.00376784	0.00213798	0.00625427	0.00614634	0.0024621	0.00266863	0.00354988	0	0.00783082	0.00182584	0.00360465	0.00163639	0	0.00294498	0	0.00483857	0.00398069	0.00605556	0.000939356	0	0	0.00389109	0.00580903	0.0084046	0.0142006	0	0.00445851	0	0.00377256	0.00358016	0.00499461	0	0.00495536	0	0.00175896	0.00233594	0	0
Zcchc2	0.127319	0.0609273	0.106849	0.106873	0.134545	0.0865412	0.0907018	0.137309	0.0942802	0.114419	0.0814741	0.0919055	0.104192	0.14744	0.0973175	0.0737366	0.0822745	0.128411	0.0615327	0.0868178	0.0746302	0.131173	0.0829695	0.0900254	0.109659	0.0726372	0.1209	0.123938	0.11377	0.101648	0	0	0.0862486	0.101624	0.10601	0.0748454	0.0972579	0.107824	0.0815865	0.106801	0.0727303	0.0901461	0.0887679	0.0755696	0.0956248	0.0773039	0.0955075	0.122784	0.0777328
Gm20753	0	0	0	0	0.000383058	0	0	0	0	0	0	0	0	0.00198104	0	0	0	0	0	0	0	0	0	0.00168793	0	0	0	0	0	0	0	0	0.00183472	0	0	0	0	0	0	0	0	0	0	0	0	0	0	0	0
Phlpp1	0.236712	0.202622	0.0883017	0.0850482	0.0806638	0.162495	0.177432	0.14088	0.126905	0.133593	0.164396	0.113297	0.0881659	0.100148	0.0961303	0.133022	0.192116	0.161243	0.119951	0.167653	0.141844	0.152822	0.121449	0.109205	0.114635	0.156751	0.171555	0.113058	0.140112	0.0913254	0	0.227711	0.0895338	0.113331	0.115984	0.0655966	0.114221	0.069686	0.0937	0.116283	0.113917	0.138776	0.172222	0.216807	0.146461	0.166094	0.204551	0.139342	0.111617
A530053M12Rik	0	0	0	0	0	0	0	0	0	0	0	0	0	0	0	0	0	0	0	0	0	0	0	0	0	0	0	0	0	0	0	0	0	0	0	0	0	0	0	0	0	0	0	0	0	0	0	0	0
Bcl2	0.987268	0.586887	0.223948	0.16255	0.188921	0.84071	0.786359	0.372748	0.420528	0.57135	0.643553	0.364369	0.14386	0.083016	0.113254	1.10484	1.47898	0.888111	0.941978	1.29447	0.601575	0.304422	0.125893	0.144755	0.165599	0.430654	0.238367	0.102235	0.0731051	0.0954914	1.64379	0.508641	0.220029	0.237619	0.200045	0.371051	0.109533	0.0512389	0.0658437	0.0784492	1.04078	1.22429	0.758219	0.85055	1.03539	0.812013	0.80623	0.410312	0.486105
D630008O14Rik	0	0	0	0	0	0	0	0	0	0	0.00255356	0	0	0	0	0.00097317	0.00166412	0	0	0.00608907	0	0	0	0	0	0.00180825	0	0	0	0	0	0	0	0	0	0	0	0	0	0	0.00169606	0.00704203	0	0	0	0.00305992	0	0	0
Kdsr	0.347907	0.260747	0.277423	0.332554	0.321858	0.336601	0.23438	0.331958	0.393098	0.345743	0.356637	0.260058	0.350436	0.38144	0.481352	0.309547	0.240477	0.256413	0.325371	0.413672	0.341303	0.265073	0.290515	0.346057	0.332557	0.388721	0.325044	0.28662	0.315655	0.303756	2.46569	0.281014	0.309282	0.424906	0.487587	0.263989	0.311768	0.30638	0.330219	0.386673	0.286147	0.244767	0.374424	0.529942	0.375478	0.271023	0.280016	0.352398	0.243573
Vps4b	0.888706	0.740112	0.792316	0.733967	0.853098	0.8767	1.00104	0.823354	0.906708	0.774405	0.706853	0.803799	0.691098	0.659266	0.762092	0.969626	0.963877	0.85792	0.833687	0.990566	0.741749	0.811359	0.641764	0.649341	0.707323	0.836362	0.834254	0.739759	0.725809	0.755804	3.28758	0.989454	0.790949	0.832338	0.901946	0.581096	0.692517	0.643597	0.641486	0.784339	0.965552	0.973436	0.967985	1.01975	0.819118	0.833329	0.918405	0.745707	0.721799
Serpinb5	0	0	0	0	0	0	0	0	0	0	0	0	0	0	0	0	0	0	0	0	0	0	0	0	0	0	0	0	0	0	0	0	0	0	0	0	0	0	0	0	0	0	0	0	0	0	0	0	0
Serpinb12	0	0	0	0	0	0	0	0	0	0	0	0	0	0	0	0	0	0	0	0	0	0	0	0	0	0	0	0	0	0	0	0	0	0	0	0	0	0	0	0	0	0	0	0	0	0	0	0	0
Serpinb13	0	0	0	0	0	0	0	0	0	0	0	0	0	0	0	0	0	0	0	0	0	0	0	0	0	0	0	0	0	0	0	0	0	0	0	0	0	0	0	0	0	0	0	0	0	0	0	0	0
Serpinb3a	0	0	0	0	0	0	0	0	0	0	0	0	0	0	0	0	0	0	0	0	0	0	0	0	0	0	0	0	0	0	0	0	0	0	0	0	0	0	0	0	0	0	0	0	0	0	0	0	0
Serpinb3d	0	0	0	0	0	0	0	0	0	0	0	0	0	0	0	0	0	0	0	0	0	0	0	0	0	0	0	0	0	0	0	0	0	0	0	0	0	0	0	0	0	0	0	0	0	0	0	0	0
Serpinb3b	0	0	0	0	0	0	0	0	0	0	0	0	0	0	0	0	0	0	0	0	0	0	0	0	0	0	0	0	0	0	0	0	0	0	0	0	0	0	0	0	0	0	0	0	0	0	0	0	0
Serpinb3c	0	0	0	0	0	0	0	0	0	0	0	0	0	0	0	0	0	0	0	0	0	0	0	0	0	0	0	0	0	0	0	0	0	0	0	0	0	0	0	0	0	0	0	0	0	0	0	0	0
Serpinb11	0	0	0	0	0	0	0	0	0	0	0	0	0	0	0.00159211	0	0	0	0	0	0	0	0	0.00197227	0	0	0	0	0	0	0	0	0	0	0	0	0	0	0	0	0	0	0	0	0	0	0	0	0
Gm15391	0	0	0	0	0	0	0	0	0	0	0	0	0	0	0	0	0	0	0	0	0	0	0	0	0	0	0	0	0	0	0	0	0	0	0	0	0	0	0	0	0	0	0	0	0	0	0	0	0
Serpinb7	0	0	0	0	0	0	0	0	0	0	0	0	0	0	0	0	0	0	0	0	0	0	0	0	0	0	0	0	0	0	0	0	0	0	0	0	0	0	0	0	0	0	0	0	0	0	0	0	0
Serpinb2	0	0	0	0	0	0	0	0	0	0	0	0	0	0	0	0	0	0	0	0	0	0	0	0	0	0	0	0	0	0	0	0	0	0	0	0	0	0	0	0	0	0	0	0	0	0	0	0	0
Serpinb8	0	0	0.0065647	0.0020892	0.0012333	0.00174762	0.00573556	0.00296727	0	0	0	0.00196509	0.00361269	0	0	0.00375105	0.0121235	0.00480342	0	0	0	0.00407946	0	0.00286106	0.0010873	0.0120047	0.0160594	0.00833989	0.00659502	0	0	0	0	0.0101652	0	0	0	0	0	0	0.00262618	0.0102645	0.0282924	0	0	0	0.00202498	0	0
Gm15389	0	0	0	0	0	0	0	0	0	0	0	0	0	0	0	0	0	0	0	0	0	0	0	0	0	0	0	0	0	0	0	0	0	0	0	0	0	0	0	0	0	0	0	0	0	0	0	0	0
D830032E09Rik	0	0	0	0	0	0	0	0	0	0	0	0	0	0	0	0	0	0	0	0	0	0	0	0	0	0	0	0	0	0	0	0	0	0	0	0	0	0	0	0	0	0	0	0	0	0	0	0	0
Cdh7	0	0	0	0	0.00083739	0.00128352	0	0	0.00383045	0	0	0	0	0	0	0.0122927	0	0	0	0.00295851	0	0	0	0	0	0	0	0	0	0	0	0	0	0	0	0	0	0	0	0	0	0	0	0.011753	0	0.00187447	0	0	0
Cdh19	0	0	0	0	0	0	0	0	0	0	0	0	0	0	0	0	0	0	0	0	0	0	0	0.00295899	0	0	0	0	0	0	0	0	0	0	0	0	0	0	0	0	0	0	0	0	0	0	0	0	0
Gm29088	0	0	0	0	0.000651066	0	0	0	0	0	0	0	0	0	0	0	0.00209694	0	0	0	0.00216105	0	0	0	0	0	0	0	0	0	0	0	0	0	0	0	0	0	0	0	0.00190244	0	0	0	0	0	0	0	0
Dsel	0.20602	0.221655	0.178661	0.23067	0.172629	0.182893	0.380043	0.378267	0.312748	0.344995	0.264443	0.388758	0.199367	0.267647	0.232875	0.19474	0.219861	0.250326	0.173655	0.210526	0.281412	0.348309	0.260511	0.283004	0.272051	0.250897	0.321974	0.22372	0.246216	0.269678	0.821895	0.709557	0.297467	0.341304	0.287777	0.33897	0.326655	0.212199	0.232456	0.257993	0.258574	0.360578	0.402436	0.367252	0.312752	0.218909	0.270868	0.285954	0.307389
Gm28189	0	0	0	0	0	0	0	0	0	0	0	0	0	0	0	0	0	0	0	0	0	0	0	0	0	0	0	0	0	0	0	0	0	0	0	0	0	0	0	0	0	0	0	0	0	0	0	0	0
9330185C12Rik	0	0	0	0	0	0.00520505	0.00142123	0	0	0	0	0.00183747	0.000774781	0	0	0.00305699	0.00520837	0	0	0	0.0018083	0	0	0	0.00170506	0	0	0	0	0	0	0	0	0	0	0	0	0	0	0	0.00390348	0.00216069	0	0	0.0114965	0	0	0	0
Cntnap5a	0.338368	0.0555155	0.00298249	0.00146532	0.0011936	0.1781	0.0530544	0.0277514	0.0261079	0.00478062	0.0603095	0.0079979	0.00313833	0	0	0.245058	0.103286	0.105121	0.0579405	0.0697338	0.10446	0.0120205	0.00526637	0	0.000745332	0.117085	0.00765885	0.00629589	0.0126774	0.00189486	0	0	0.00136021	0	0.000999708	0.0727451	0.00493052	0	0.00175848	0	0.183154	0.110688	0.133561	0.0424053	0.0212442	0.135961	0.0288278	0.0353805	0.0189958
Gm19965	0	0	0	0	0	0	0	0	0	0	0	0	0	0	0	0	0	0	0	0	0	0	0	0	0	0	0	0	0	0	0	0	0	0	0	0	0	0	0	0	0	0	0	0	0	0	0	0	0
Zfp813-ps	0	0	0	0	0	0	0	0	0	0	0	0	0	0	0	0	0	0	0	0	0	0	0	0	0	0	0	0	0	0	0	0	0	0	0	0	0	0	0	0	0	0	0	0	0	0	0	0	0
Gm28363	0	0	0	0	0	0	0	0	0	0	0	0	0	0	0	0	0	0	0	0	0	0	0	0	0	0	0	0	0	0	0	0	0	0	0	0	0	0	0	0	0	0	0	0	0	0	0	0	0
B020011L13Rik	0	0	0	0	0	0	0	0	0	0	0	0	0	0	0	0	0	0	0	0	0	0	0	0	0	0	0	0	0	0	0	0	0	0	0	0	0	0	0	0	0	0	0	0	0	0	0	0	0
Gm28360	0	0	0	0	0	0	0	0	0	0	0	0	0	0	0	0	0	0	0	0	0	0	0	0	0	0	0	0	0	0	0	0	0	0	0	0	0	0	0	0	0	0	0	0	0	0	0	0	0
Gm28168	0	0	0	0	0	0	0	0	0	0	0	0	0	0	0	0	0	0	0	0	0	0	0	0	0	0	0	0	0	0	0	0	0	0	0	0	0	0	0	0	0	0	0	0	0	0	0	0	0
Gm7145	0	0	0	0	0	0	0	0	0	0	0	0	0	0	0	0	0	0	0	0	0	0	0	0	0	0	0	0	0	0	0	0	0	0	0	0	0	0	0	0	0	0	0	0	0	0	0	0	0
Gm29106	0	0	0	0	0	0	0	0	0	0	0	0	0	0	0	0	0	0	0	0	0	0	0	0	0	0	0	0	0	0	0	0	0	0	0	0	0	0	0	0	0	0	0	0	0	0	0	0	0
Tsn	1.55262	1.461	1.70474	1.59038	1.89124	1.82659	1.97143	1.99099	1.55926	1.9659	1.62494	1.76344	1.76334	1.60493	1.74439	1.81247	2.00697	1.84692	1.51854	1.91463	2.01314	2.37989	2.17832	2.03813	2.19201	2.26864	2.63262	2.22	2.28526	2.32088	0.821895	1.17583	1.72696	1.31744	1.61313	1.68796	2.58481	2.18108	1.81905	2.0977	1.9547	2.22656	2.02241	1.90447	2.09602	1.98665	2.2727	2.13739	1.74818
Nifk	0.582007	0.47962	0.598552	0.492235	0.632045	0.729384	1.03388	1.01104	0.622381	0.924062	0.704432	0.76808	0.832243	0.643568	0.895542	0.704578	0.823324	0.712812	0.594092	0.761038	0.692811	0.882008	1.01711	0.716621	0.842293	0.726445	0.805634	0.770001	0.577275	0.680417	1.64379	0.35905	0.566902	0.38819	0.549978	0.6428	0.840881	0.94449	0.694658	0.798987	0.87861	1.05613	0.913818	0.925209	0.959112	0.853206	1.12677	1.23241	0.789411
Gm28867	0	0	0	0	0	0	0	0	0	0	0	0	0.00175562	0	0	0	0	0	0	0	0	0	0	0	0	0	0	0	0	0	0	0	0	0	0	0	0	0	0.00271503	0	0	0	0	0	0	0	0	0	0
Clasp1	0.646114	0.396586	0.45935	0.489448	0.465037	0.469894	0.402858	0.365566	0.504482	0.404306	0.384205	0.417413	0.376136	0.364796	0.371384	0.428591	0.515108	0.449366	0.494018	0.518786	0.390521	0.341105	0.359891	0.336569	0.330143	0.525325	0.46412	0.413648	0.437996	0.412786	1.64379	0.404663	0.590712	0.588847	0.518793	0.368932	0.257294	0.275061	0.29168	0.26504	0.447685	0.437986	0.469982	0.369814	0.448665	0.486924	0.404598	0.433068	0.454191
2900060B14Rik	0.0701235	0.040282	0.0605336	0.0796212	0.108804	0.0458131	0.0507983	0.0788538	0.1235	0.0567607	0.048708	0.0611104	0.0467436	0.0403246	0.039479	0.0379588	0.063395	0.0823437	0.0737039	0.0984399	0.0353612	0.0627398	0.0696704	0.0909557	0.0693706	0.0301567	0.0680013	0.0546246	0.0847305	0.0679413	0	0.066306	0.061532	0.0679173	0.107444	0.0518694	0.0812785	0.0435456	0.0576633	0.0501399	0.0329883	0.0396639	0.0421814	0.0553343	0.060325	0.0407482	0.0655243	0.0663244	0.0448833
Tfcp2l1	0.0814804	0.0230469	0.019484	0.0249257	0.0334938	0.0442752	0.0178684	0.0263297	0.0470053	0.045344	0.0477893	0.02551	0.0134591	0.0129602	0.0106086	0.0276655	0.0461449	0.0229917	0.0172635	0.041915	0.0413195	0.0271427	0.0158944	0.0265447	0.0369755	0.0181689	0.0182007	0.012081	0.0186764	0.0155157	0	0	0.029307	0.0304924	0.0206273	0.0847283	0.00493052	0.0181734	0.016183	0.0192317	0.0240581	0.0279442	0.020426	0.0478797	0.0424172	0.0333304	0.0385859	0.0315208	0.041939
Gli2	0.0162613	0.0208572	0.0189822	0.0102135	0.0126722	0.049069	0.0094505	0.0170291	0.00665388	0.0132214	0.00872221	0.00895742	0.0196897	0.0234404	0.0177395	0.0619469	0.0150932	0.0165164	0.0401163	0.0302548	0.0539276	0.0118323	0.0227165	0.0480151	0.0276761	0.0329843	0.0189533	0.0175537	0.0204727	0.0155705	0	0	0.00603915	0.00378849	0.0056527	0.0375039	0.00977009	0.0180239	0.0404533	0.0175617	0.0664778	0.0209641	0.0237477	0.0364727	0.0448875	0.0599774	0.0272422	0.0282729	0.0397474
Gm26831	0	0	0	0	0	0	0	0	0	0	0	0	0	0	0	0	0	0	0	0	0	0	0	0	0.00145509	0	0	0.000795744	0	0	0	0	0	0	0	0	0	0	0	0	0	0	0	0	0	0.00179024	0	0	0
Gm29456	0	0	0	0	0	0	0	0	0	0	0	0	0	0	0	0	0	0	0	0	0	0	0.00149114	0	0	0	0	0	0	0	0	0	0	0	0	0	0	0	0.00248717	0	0	0	0	0	0	0	0	0	0
Gm29455	0	0	0	0	0	0	0	0	0	0	0	0	0	0	0	0	0	0	0	0	0	0.00219694	0	0	0	0	0.00355877	0	0	0	0	0	0	0	0	0	0	0	0	0	0	0	0	0	0	0	0	0	0
Inhbb	1.16893	0.432449	0.151419	0.0945052	0.319326	2.08684	0.952444	0.62261	0.26391	0.508584	0.994699	0.276477	0.0945968	0.163692	0.29356	1.87644	0.899612	0.676092	0.288007	0.616585	2.34209	4.61181	3.83321	3.63976	6.29626	3.08269	10.0048	2.77434	4.0083	7.20679	0	0.066306	0.0596596	0.0887822	0.110824	2.53688	6.63836	1.16846	2.69944	4.89558	1.46293	1.21207	0.992762	0.782376	0.730464	1.53909	1.14744	0.78055	0.44062
Ralb	0.187586	0.269219	0.234325	0.404269	0.34067	0.340555	0.197545	0.185252	0.220728	0.229947	0.193344	0.1123	0.120864	0.246509	0.222043	0.377626	0.243827	0.339203	0.375767	0.387041	0.295757	0.270419	0.268403	0.365214	0.428973	0.48705	0.39106	0.151857	0.346804	0.338782	0	0.132612	0.235915	0.407587	0.384001	0.308826	0.332584	0.182667	0.365024	0.334521	0.525829	0.328924	0.343408	0.543862	0.437722	0.473086	0.240683	0.231351	0.271916
Gm27184	0.0127068	0.0110722	0	0.00264247	0.00104566	0.00608772	0	0.00485683	0.00749121	0.0041123	0.00399914	0	0	0.00576781	0.00165753	0.00225309	0	0	0.0116866	0	0.00333892	0	0.00182094	0.00165116	0.00811738	0.00433464	0.00223428	0.00326594	0	0.00366207	0	0	0	0.00430666	0.00324968	0.00686521	0	0.00355607	0.00149179	0.00179056	0.00709434	0.00269788	0.00878741	0	0	0.0083305	0	0.00424321	0
Tmem185b	0.142864	0.104276	0.0437968	0.0749222	0.0965226	0.143992	0.0829001	0.0833023	0.070344	0.114794	0.128854	0.0527009	0.0664814	0.0650756	0.12553	0.131798	0.0634084	0.0658312	0.102263	0.140226	0.126745	0.085449	0.0899229	0.114836	0.126457	0.18571	0.0922359	0.0615111	0.0881427	0.124851	0.821895	0	0.0400098	0.0535284	0.0995101	0.130496	0.0411239	0.0677555	0.141981	0.165922	0.180577	0.0843431	0.0547532	0.18202	0.143542	0.171999	0.0719691	0.0620671	0.100505
3830432H09Rik	0	0	0.00232292	0.000995219	0.000710552	0.00185683	0.00141353	0.00283969	0.00446716	0	0.0117261	0	0	0	0.00498362	0	0	0	0	0	0.00166903	0.00147358	0.00432458	0.00665351	0	0	0.00295082	0.00089944	0.000952659	0	0	0	0.00126619	0	0	0	0	0.00125897	0	0	0	0.00872623	0	0.00655317	0.00254609	0	0	0	0.00280218
Epb41l5	0.673005	0.555584	0.285635	0.353571	0.31958	0.561385	0.470041	0.573507	0.522172	0.510663	0.394961	0.392141	0.307093	0.264047	0.280653	0.602476	0.620971	0.587593	0.698809	0.524462	0.447892	0.412554	0.42041	0.369406	0.449225	0.47417	0.364096	0.323356	0.316143	0.340306	0	0.733597	0.393912	0.329686	0.397035	0.415142	0.498335	0.306085	0.275387	0.360684	0.582692	0.656299	0.577686	0.745846	0.465624	0.603905	0.52259	0.639094	0.60545
Ptpn4	0.239444	0.221012	0.163987	0.21695	0.187349	0.224019	0.211864	0.197673	0.251129	0.294405	0.200279	0.248419	0.179884	0.201983	0.236626	0.213477	0.255063	0.257332	0.281011	0.222184	0.203986	0.203208	0.188299	0.190052	0.226414	0.212281	0.190351	0.165385	0.226527	0.208199	0	0.251479	0.139912	0.191333	0.242851	0.188607	0.129601	0.145873	0.164415	0.179268	0.189969	0.275497	0.248768	0.357109	0.262817	0.209988	0.229744	0.211592	0.299457
Gm28209	0	0	0	0	0	0	0	0	0	0	0	0	0	0	0	0	0	0	0	0	0	0	0	0	0	0	0	0	0	0	0	0	0	0	0	0	0	0	0	0	0	0	0	0	0	0	0	0	0
Tmem177	0.0182104	0.0312365	0.0292973	0.0331455	0.0512303	0.0352497	0.0302834	0.0226027	0.0208883	0.0501562	0.0166535	0.0201378	0.0280998	0.0337961	0.0414599	0.0309864	0.0273549	0.0221741	0.0449485	0.0624669	0.0423161	0.0543592	0.046599	0.0263785	0.0814643	0.0663666	0.0867803	0.0451037	0.0461691	0.0832535	0	0	0.0345944	0.0371595	0.0379547	0.047588	0.0275391	0.0593312	0.044504	0.0613663	0.0240089	0.0338606	0.0391545	0.0275502	0.0615119	0.0447953	0.0478501	0.0537526	0.0204748
Cfap221	0	0	0	0	0	0	0	0	0	0	0	0	0	0	0	0	0	0	0	0	0	0.00132897	0.00166101	0	0	0	0	0.000633488	0.00212395	0	0	0	0	0	0	0	0	0.00132054	0	0	0	0	0	0	0.00365084	0	0.00221145	0	0
Sctr	0	0	0	0	0.000753381	0.000943207	0	0	0	0	0	0	0	0.00191334	0	0	0	0	0	0	0	0	0	0	0	0	0	0	0	0	0	0	0	0	0	0	0	0	0	0	0	0	0	0	0	0	0	0	0
Tmem37	0	0	0.0218259	0.0436342	0.0383873	0.012195	0.00662691	0.00369107	0.00815377	0.0102505	0.00607325	0.00685132	0.012292	0.0154717	0.0138098	0.00724113	0.0101036	0.0279309	0.00918453	0.00933561	0.0250938	0.0101862	0.0111686	0.029689	0.0309793	0.0160277	0.0137381	0.0126161	0.00947741	0.020443	0	0	0.020023	0.020163	0.0219384	0.0110297	0	0.00517034	0.0322787	0.0126175	0.00468999	0.00893769	0.0088832	0.00764028	0.0111324	0.0108935	0.0153503	0	0.0166025
Dbi	1.41595	1.45296	1.54022	1.96851	2.18909	1.54204	1.08166	1.23547	1.45882	1.46092	1.57091	1.14351	1.05536	1.40222	1.416	1.64271	1.2135	1.33137	1.18077	1.61193	2.0175	2.50507	2.70552	2.53805	3.17041	2.43807	2.764	2.18529	2.75858	2.81425	0	1.67184	0.982392	1.16714	1.28298	2.41401	3.25597	2.38048	2.57219	2.85878	1.72123	1.2164	1.35599	1.60698	1.66273	1.82371	1.56707	1.80707	1.77183
3110009E18Rik	0.0554484	0.0690778	0.0438825	0.0813516	0.0836031	0.0902885	0.0478394	0.0415784	0.0288684	0.103608	0.0723771	0.0470011	0.0479627	0.0474482	0.0912991	0.0662993	0.046874	0.040224	0.0413669	0.0655388	0.0820848	0.0881091	0.0834793	0.118187	0.124513	0.0931235	0.0973441	0.0756365	0.0992946	0.12777	0	0	0.0331537	0.0727816	0.0559526	0.0973333	0.0770788	0.0643497	0.122184	0.153501	0.12313	0.0403259	0.0524174	0.0953663	0.109632	0.0875846	0.0577134	0.0490417	0.0743179
Steap3	0.17621	0.204659	0.308036	0.179329	0.192871	0.0942844	0.111922	0.348817	0.294961	0.186108	0.0994123	0.234307	0.252578	0.250823	0.120416	0.0941516	0.0942747	0.154338	0.0919001	0.147463	0.141004	0.217534	0.378431	0.364393	0.20941	0.187455	0.225671	0.35993	0.300453	0.200924	0	0.149711	0.144771	0.183098	0.125805	0.116977	0.164882	0.307338	0.225378	0.19131	0.1086	0.0520661	0.155186	0.145874	0.150796	0.150671	0.158254	0.389799	0.234896
C1ql2	0	0	0	0	0	0	0	0	0	0	0	0	0	0	0	0	0	0	0	0.00325279	0	0	0	0	0	0	0	0	0	0.000625961	0	0	0	0	0	0	0	0	0	0	0	0	0	0	0	0	0	0	0
1700012E03Rik	0	0	0	0	0	0	0	0	0	0	0	0	0	0	0	0	0	0	0	0	0	0	0	0	0	0	0	0	0	0	0	0	0	0	0	0	0	0	0	0	0	0	0	0	0	0	0	0	0
Marco	0	0	0	0	0	0	0	0	0	0	0	0	0	0	0	0	0	0	0	0	0	0	0	0	0	0	0	0	0	0	0	0	0	0	0	0	0	0	0	0	0	0	0	0	0	0	0	0	0
En1	0	0	0	0	0	0	0	0	0	0	0.0038721	0	0	0	0	0	0	0	0	0	0	0	0	0	0	0	0	0	0	0	0	0	0	0	0	0	0	0	0	0	0	0	0	0	0	0	0	0	0
2610027F03Rik	0	0	0	0	0	0	0	0	0	0	0	0	0	0	0	0	0	0	0	0	0	0	0	0	0	0	0	0	0	0	0	0	0	0	0	0	0	0	0	0	0	0	0	0	0	0	0	0	0
Gm29346	0	0	0	0	0	0	0	0	0	0	0	0	0	0	0	0	0	0	0	0	0	0	0	0	0	0	0	0	0	0	0	0	0	0	0	0	0	0	0	0	0	0	0	0	0	0	0	0	0
Gm29345	0	0	0	0	0	0	0	0	0	0	0	0	0	0	0	0	0	0	0	0	0	0	0	0	0	0	0	0	0	0	0	0	0	0	0	0	0	0	0	0	0	0	0	0	0	0	0	0	0
Gm29348	0	0	0	0	0	0	0	0	0	0	0	0	0	0	0	0	0	0	0	0	0	0	0	0	0	0	0	0	0	0	0	0	0	0	0	0	0	0	0	0	0	0	0	0	0	0	0	0	0
Gm29347	0	0	0	0	0	0	0	0	0	0	0	0	0	0	0	0	0	0	0	0	0	0	0	0	0	0	0	0	0	0	0	0	0	0	0	0	0	0	0	0	0	0	0	0	0	0	0	0	0
Celrr	0	0	0	0	0	0	0	0	0	0	0	0	0	0	0	0	0	0	0	0	0	0	0	0	0	0	0	0	0	0	0	0	0	0	0	0	0	0	0	0	0	0	0	0	0	0	0	0	0
Gm29359	0	0	0	0	0	0	0	0	0	0	0	0	0	0	0	0	0	0	0	0	0	0	0	0	0	0	0	0	0	0	0	0	0	0	0	0	0	0	0	0	0	0	0	0	0	0	0	0	0
Insig2	0.45977	0.455072	0.396976	0.359668	0.396752	0.331955	0.261765	0.25216	0.275383	0.311575	0.272871	0.267983	0.280344	0.235258	0.36199	0.340048	0.407799	0.342108	0.446437	0.413746	0.180012	0.181346	0.167866	0.24713	0.243405	0.268335	0.190764	0.212468	0.255006	0.246762	0	0.720562	0.405396	0.39101	0.49027	0.296569	0.164368	0.224934	0.248821	0.319815	0.252062	0.285183	0.313277	0.285458	0.297428	0.220804	0.235469	0.207715	0.268116
2210011K15Rik	0	0	0	0	0	0	0	0	0	0	0	0	0	0	0	0	0	0	0	0	0	0	0	0	0	0	0	0	0	0	0	0	0	0	0	0	0	0	0	0	0	0	0	0	0	0	0	0	0
Ccdc93	0.0483077	0.201674	0.144661	0.136239	0.157621	0.094936	0.145937	0.171887	0.150672	0.159892	0.088889	0.13596	0.138354	0.146458	0.10971	0.0914344	0.135139	0.196269	0.17186	0.161799	0.0748336	0.105399	0.113986	0.119809	0.122525	0.0919102	0.0896113	0.11601	0.0895143	0.0924003	0	0.218827	0.14084	0.136994	0.1416	0.0185805	0.124338	0.10838	0.136172	0.106194	0.108244	0.0911043	0.109678	0.119388	0.12694	0.103608	0.0877982	0.162541	0.115949
Gm15392	0	0	0	0	0	0	0	0	0	0	0	0	0	0	0	0	0	0	0	0	0	0	0	0	0	0	0	0	0	0	0	0	0	0	0	0	0	0	0	0	0	0	0	0	0	0	0	0	0
Htr5b	0	0.0224261	0.00127963	0	0.000680986	0	0	0	0	0	0	0.0046422	0.00125674	0	0	0	0	0	0	0	0	0	0	0	0	0	0	0	0.00172472	0	0	0	0	0	0	0	0.00897731	0	0	0	0	0	0	0	0	0	0	0	0
Ddx18	0.755273	0.5842	0.657762	0.563894	0.912657	0.878215	0.932421	0.84647	0.718374	1.0301	0.76304	0.842567	0.818674	0.776801	1.07291	0.87753	0.782977	0.525362	0.623491	0.880457	0.997365	1.02163	0.905189	0.982359	1.06115	0.802473	0.66076	0.69717	0.65386	0.822528	2.46569	0.515242	0.687192	0.487601	0.812309	1.00906	1.03246	0.738324	0.88612	1.04928	0.942325	0.997733	0.839716	0.780467	1.13513	1.12263	1.04138	1.05917	0.898056
Gm28590	0	0	0	0	0	0	0	0	0	0	0	0	0	0	0	0	0	0	0	0	0	0	0	0	0	0	0	0	0	0	0	0	0	0	0	0	0	0	0	0	0	0	0	0	0	0	0	0	0
Dpp10	0	0	0.00205225	0.00299561	0.00413053	0.000728121	0.00127127	0.00133346	0.00361856	0.00117697	0	0.00374408	0.00679871	0.00278159	0.00303739	0	0.00132337	0	0	0	0.00312318	0.00135431	0.00252859	0	0.00124063	0	0	0.00114773	0.00600994	0.00463278	0	0	0.00164517	0.0142757	0.0309617	0	0.00998891	0	0	0.00279387	0.00200772	0.00145831	0	0	0.00273103	0	0	0	0.00568882
Gm28928	0	0	0	0	0	0	0	0	0	0	0	0	0	0	0	0	0	0	0	0	0	0	0	0	0	0	0	0	0	0	0	0	0	0	0	0	0	0	0	0	0	0	0	0	0	0	0	0	0
1700121L03Rik	0	0	0	0	0	0	0	0	0	0	0	0	0	0	0	0	0	0	0	0	0	0	0	0	0	0	0	0	0	0	0	0	0	0	0	0	0	0	0	0	0	0	0	0	0	0	0	0	0
Actr3	1.26348	0.94172	1.3044	1.41736	1.53733	1.09558	1.06185	0.988154	1.01543	0.997135	1.04765	0.838374	0.993543	1.07503	1.1811	1.16958	1.20547	1.29412	1.08245	1.0576	0.974234	0.845036	0.858005	0.913879	1.0429	1.3811	1.09372	1.16808	1.34523	1.26754	0	0.937568	1.36962	1.46354	1.38597	1.0481	0.860549	1.11132	1.33308	1.2817	1.05956	1.06865	1.03184	1.13498	1.13556	1.02369	0.913775	0.986762	0.998415
Gm28706	0	0	0	0	0	0	0	0	0	0	0	0	0	0	0	0	0	0	0	0	0	0	0	0	0	0	0	0	0	0	0	0	0	0	0	0	0	0	0	0	0	0	0	0	0	0	0	0	0
Slc35f5	0.227152	0.0655026	0.0990131	0.184123	0.207603	0.134508	0.0689778	0.0710631	0.121819	0.19628	0.159663	0.0692661	0.0591359	0.143606	0.219597	0.1571	0.0612243	0.127903	0.125372	0.160023	0.139999	0.067935	0.0577313	0.0869917	0.13293	0.135063	0.07359	0.0726542	0.148535	0.180341	0	0.139844	0.0995857	0.192236	0.240577	0.12506	0.0960217	0.0877339	0.152104	0.194837	0.153878	0.0649257	0.0751656	0.0834265	0.134702	0.16021	0.0477235	0.0791402	0.193371
Gpr39	0	0	0.00236942	0.00297214	0.00466463	0	0	0	0	0	0	0	0.00102728	0	0	0	0	0	0	0	0	0	0	0	0	0	0	0.00130973	0.00154917	0.00412031	0	0	0.00131583	0.00284212	0	0	0	0	0.00226679	0.00177673	0	0	0	0	0	0	0	0	0
Lypd1	0	0.0115382	0	0.00177908	0.0016831	0	0	0	0	0.00175412	0	0	0	0	0	0	0	0	0	0.00302871	0	0	0	0	0	0	0	0	0.00381223	0	0	0	0	0	0	0	0	0	0	0	0	0	0	0	0	0	0	0	0
Nckap5	0	0.0182061	0.00142124	0.00694432	0.00763496	0.00163223	0.00127582	0.00703709	0	0.0102722	0	0.0229953	0.00240012	0.0021635	0.0031451	0.000917808	0	0	0	0	0	0.00861305	0.00444912	0.00908535	0.00916031	0.00373353	0.016608	0.0031942	0.0165741	0.0103602	0	0	0.00217201	0.00686341	0.0117359	0.0168508	0.00489747	0.00786468	0	0.00267328	0	0	0	0.00669898	0	0	0.00205533	0	0
4930599A14Rik	0	0.00804942	0	0	0	0	0	0	0	0	0	0	0	0	0	0	0	0	0	0	0	0	0	0	0	0	0	0	0	0	0	0	0	0	0	0	0	0	0	0	0	0	0	0	0	0	0	0	0
Mgat5	0.332608	0.274923	0.115154	0.159686	0.135374	0.322704	0.34363	0.373443	0.235579	0.275755	0.235398	0.247739	0.133401	0.17236	0.136657	0.472079	0.486497	0.535783	0.478323	0.437191	0.262573	0.271145	0.205304	0.208154	0.185138	0.290892	0.239099	0.20396	0.146768	0.176584	0	0.131195	0.12323	0.138218	0.104724	0.303074	0.148781	0.134136	0.131659	0.14976	0.439749	0.370506	0.586403	0.364451	0.403129	0.369044	0.292677	0.299447	0.255645
Tmem163	0	0	0	0.00136918	0	0.00117029	0	0	0.00621342	0	0	0	0	0	0	0.00370643	0	0.00829806	0	0	0	0.00153205	0.00266933	0	0.000886731	0.00308579	0	0.0012339	0	0	0	0	0	0	0	0	0	0.00117039	0.002651	0	0	0	0.00839649	0	0	0	0	0	0
Acmsd	0	0	0	0.000703587	0	0	0	0	0	0	0	0.0019761	0	0.00230987	0	0	0	0	0	0	0	0	0.00123712	0	0	0	0	0	0.00251393	0	0	0	0	0	0.00257128	0	0	0	0	0	0	0	0	0	0	0	0	0	0
2900009J06Rik	0.0396977	0.0222886	0.0354072	0.0378642	0.0251229	0.0396266	0.0251654	0.0430877	0.0225147	0.0297967	0.0235875	0.033206	0.0469631	0.016905	0.0548912	0.0333629	0.0323196	0.0206885	0.0497844	0.0721515	0.0222512	0.0205282	0.0158525	0.0237448	0.0320775	0.033704	0.0297439	0.0330723	0.0277325	0.0285412	0	0	0.033415	0.0433932	0.0344972	0.0464225	0.0120143	0.0296791	0.0393441	0.0291195	0.0383423	0.0397367	0.0230187	0.0424125	0.0347572	0.0242384	0.0239207	0.00883843	0.0156097
Ccnt2	0.739881	0.68606	0.501062	0.569759	0.871018	0.569523	0.664332	0.722638	0.698099	0.912099	0.628636	0.574395	0.524785	0.556516	0.836101	0.664385	0.776849	0.766467	0.693674	0.892533	0.563561	0.451814	0.389472	0.426832	0.660988	0.525882	0.513122	0.428987	0.488397	0.6238	0	0.482259	0.663802	0.732578	1.03536	0.49125	0.339318	0.408606	0.42608	0.739745	0.592943	0.692378	0.686567	0.639654	0.939671	0.589795	0.72519	0.520822	0.601205
Map3k19	0	0	0.00082111	0.00102997	0.000659178	0	0.00181807	0	0	0	0	0	0.00128537	0	0	0	0	0	0.00450175	0.00440943	0	0	0.00131174	0.00184674	0	0	0.0019729	0.000807349	0.00133759	0	0	0.0961686	0.00168469	0	0.00792221	0	0	0.0034817	0	0	0	0	0.00610165	0	0.00758884	0.00312927	0	0	0
Rab3gap1	0.37445	0.567237	0.455409	0.510905	0.520645	0.426185	0.561694	0.590406	0.360713	0.396321	0.346211	0.448772	0.385239	0.424232	0.402186	0.380313	0.548536	0.606396	0.601881	0.552265	0.307995	0.336384	0.389251	0.346406	0.355693	0.420335	0.419837	0.452062	0.408988	0.367019	0	0.494404	0.48095	0.539053	0.539194	0.255901	0.354349	0.441624	0.342359	0.39822	0.402624	0.579564	0.590831	0.516231	0.426686	0.388575	0.463655	0.439751	0.377681
Zranb3	0.0392601	0.126039	0.101144	0.152441	0.148794	0.094703	0.120107	0.0967078	0.164518	0.141518	0.123712	0.159285	0.13155	0.143234	0.234102	0.0684537	0.125143	0.0946624	0.0989985	0.141113	0.199341	0.210721	0.233277	0.269422	0.264123	0.245108	0.175351	0.214796	0.223382	0.261349	0.821895	0.066306	0.134331	0.128378	0.158727	0.0558431	0.0836427	0.151456	0.188773	0.198471	0.0839152	0.0790545	0.123442	0.128991	0.109777	0.0990785	0.133266	0.201175	0.169684
Gm28800	0	0.00810273	0.00579981	0.00641151	0.0089864	0.000787625	0.00394649	0	0	0.00390458	0.00659522	0.00469193	0.00339697	0.00726528	0.00768342	0.00114135	0.00293359	0.0117552	0.0173004	0.00579277	0.00176561	0.00293942	0.00834383	0	0.00106016	0.00752732	0	0.000707169	0.00242467	0	0	0	0.00289004	0.00596881	0.0105886	0	0	0.00195109	0.00161419	0.00299398	0.00295132	0.0050874	0.00791647	0	0.00526525	0	0.005021	0	0
R3hdm1	1.94714	2.11596	1.91106	2.53499	2.32371	1.87595	1.93083	1.9038	2.48889	2.39133	2.26618	2.35103	2.0619	2.78849	2.69276	1.56173	1.83587	1.97683	2.63066	2.32201	1.80208	1.64194	1.56299	1.79453	1.95908	1.34329	1.4886	1.6881	1.84831	1.8451	5.75327	4.54722	2.24958	3.40027	3.28112	1.92817	1.77941	1.59485	1.79989	1.89879	1.66724	1.78272	1.84414	2.12612	1.83482	1.58924	1.65169	1.53097	2.0273
Ubxn4	1.82944	2.4059	2.05487	2.00371	2.22582	1.65079	2.13889	2.15678	1.65542	1.97471	1.72262	2.08758	2.02747	1.81109	2.1221	1.58227	2.2651	2.14795	1.96246	2.01552	1.38696	1.58437	1.83328	1.45172	1.68881	1.8158	2.05276	2.0784	1.72159	1.88295	2.46569	3.17141	2.22674	1.72226	1.85987	1.53489	1.99023	2.09376	1.78704	1.93056	1.65251	2.20387	2.06292	1.95319	1.97957	1.47661	1.89792	1.86595	1.39001
Lct	0	0	0.00084339	0.000802738	0.000953959	0	0	0	0	0.00319037	0.00325639	0	0	0	0.00153834	0.0014262	0	0	0	0	0	0	0.00254807	0	0.00504725	0	0	0.000594513	0.00124776	0	0	0	0	0	0.00124197	0	0	0	0.00366054	0	0	0	0	0	0	0.00326098	0.00200623	0	0
Mcm6	0.328284	0.376188	0.543607	0.368922	0.382399	0.45104	0.545361	0.441067	0.33541	0.546675	0.37936	0.493336	0.531829	0.411409	0.382447	0.354953	0.35215	0.365253	0.336571	0.315408	3.07727	2.68248	2.54257	2.35578	2.36077	0.541178	0.794592	0.918375	0.691154	0.669428	0	0.412104	0.497963	0.466043	0.320549	0.863712	1.13491	0.999261	0.760767	0.634892	0.398452	0.403529	0.361009	0.466507	0.392811	2.07419	1.94643	2.32803	2.01576
Dars	0.740841	0.437647	0.52572	0.610153	0.692843	0.62176	0.425595	0.544264	0.549943	0.556898	0.525476	0.443981	0.479927	0.58515	0.666665	0.59483	0.367659	0.355739	0.461584	0.418787	0.675302	0.472666	0.561508	0.660326	0.706959	0.795927	0.49925	0.50174	0.67005	0.661725	0	0.4945	0.485043	0.547688	0.630124	0.597806	0.485773	0.481095	0.596426	0.635586	0.633705	0.519914	0.49259	0.583195	0.478455	0.650583	0.463431	0.594094	0.461224
Cxcr4	0.00833728	0	0.00786388	0.00604724	0.00315984	0.00440754	0.00200304	0.00322223	0	0.00531995	0.00347933	0.00653784	0.000544084	0.00646822	0.00186121	0.00145828	0.00206788	0.00771919	0	0	0.0018882	0.00174647	0.00106588	0	0.000994681	0.00373353	0.00156042	0.00209069	0.00221402	0.00669816	0	0	0.00581975	0.0135404	0.00501492	0	0.0201728	0.00405541	0.00348267	0	0	0.00294875	0.00807179	0.0125862	0	0.0025027	0.0039036	0	0
Gm26686	0	0	0	0	0	0	0	0	0	0	0	0	0	0	0	0	0	0	0	0	0	0	0	0	0	0	0	0	0	0	0	0	0	0	0	0	0	0	0	0	0	0	0	0	0	0	0	0	0
Thsd7b	0	0.0106423	0.00135762	0	0	0	0	0	0	0	0	0	0.00242718	0.00158528	0	0.00276861	0	0.00355403	0	0	0	0.00144892	0	0	0.000368475	0.00476491	0.00652848	0.00119138	0	0.00243895	0	0	0.00158084	0	0	0	0.00434705	0	0	0	0	0	0	0	0	0	0	0	0
Gm16081	0	0	0	0	0	0	0	0	0	0	0	0	0	0	0	0.00125631	0	0	0	0	0	0	0	0	0	0	0	0	0	0	0	0	0	0	0	0	0	0	0	0	0	0	0	0	0	0	0	0	0
Cd55b	0	0	0	0	0	0	0	0	0	0	0	0	0	0	0	0	0	0	0	0	0	0	0	0	0	0	0	0	0	0	0	0	0	0	0	0	0	0	0	0	0	0	0	0	0	0	0	0	0
Gm15674	0	0	0	0.00280634	0	0	0	0	0	0	0	0	0	0	0	0	0	0	0	0	0	0	0	0	0	0	0	0	0	0	0	0	0	0	0	0	0	0	0	0	0	0	0	0	0	0	0	0	0
Gm15675	0	0	0.00338376	0.00233213	0.0090665	0.000548888	0	0	0.00571424	0	0	0	0	0	0	0.00284505	0	0.00320312	0	0	0	0	0.0026518	0	0.000992041	0	0	0.000990211	0	0	0	0.0719383	0.00409554	0.002072	0.00445042	0	0	0	0	0	0	0	0	0	0	0	0	0	0
Cd55	0.128443	0.0879086	0.0592544	0.115593	0.12399	0.00534326	0.0103838	0.0173213	0	0.00881561	0.00637737	0.00703018	0.0188943	0.047212	0.0185724	0.0132414	0.00765808	0.0165012	0.04091	0.039227	0.00816243	0.00687017	0.00123712	0.00167198	0.00544837	0.0145602	0.00475224	0.00700489	0.0119448	0.0202264	0	0.368388	0.0916852	0.145815	0.132883	0	0.00967804	0.00379745	0.00178439	0.0069526	0.00196124	0.00580666	0	0.0115347	0.00294076	0	0.00745934	0	0.00585694
Gm16083	0	0.00913284	0.00126881	0.00245693	0.0014201	0	0	0	0	0	0	0	0.00104167	0	0.00103523	0	0	0.00433294	0	0	0	0	0	0	0	0	0	0	0	0	0	0	0.00457103	0	0.00746725	0	0	0	0	0	0	0	0	0	0	0	0	0	0
Zp3r	0	0	0	0	0	0	0	0	0	0	0	0	0	0	0	0	0	0	0	0	0	0	0	0	0	0	0	0	0	0	0	0	0	0.00275262	0	0	0	0	0	0	0	0	0	0	0	0	0	0	0
C4bp	0	0	0	0	0	0	0	0	0	0	0	0	0	0	0	0	0	0	0	0	0	0	0	0	0	0	0	0.000808827	0	0	0	0	0	0	0	0	0	0	0	0	0	0	0	0	0	0	0	0	0
Gm29427	0	0	0	0.00120138	0.000883157	0	0	0.00204873	0.00555899	0.0014795	0.00486361	0	0	0	0	0	0	0	0	0.00537791	0	0.00159994	0	0	0	0	0	0.00120344	0	0	0	0	0	0	0	0	0	0	0	0	0	0	0	0	0	0	0	0.00522723	0
Pfkfb2	0.00962116	0.00794872	0.0116918	0.0385424	0.0451978	0.0210426	0.0124932	0.00973819	0.0206374	0.0204331	0.0308037	0.0242501	0.00827507	0.0151724	0.0209219	0.025418	0.0136778	0.00819864	0.0620733	0.00849133	0.0339706	0.00841488	0.0139641	0.0259211	0.013072	0.0245142	0.00929316	0.0164701	0.0239381	0.0117616	0.821895	0.0522488	0.0249731	0.0541584	0.0142618	0.02063	0.00796803	0.0114107	0.0241219	0.0175672	0.0244932	0.0108008	0.0220621	0.0451453	0.0183961	0.0334204	0.0113073	0.00508235	0.0287108
Yod1	0.17632	0.120283	0.156922	0.251137	0.26991	0.162861	0.165997	0.179328	0.276502	0.176918	0.27192	0.204991	0.151647	0.30382	0.21656	0.160376	0.148993	0.211596	0.290611	0.125466	0.164404	0.131767	0.146096	0.206849	0.160942	0.182724	0.117991	0.134106	0.180348	0.17525	0.821895	0.180617	0.174277	0.265781	0.309311	0.203013	0.0818982	0.174109	0.249469	0.164732	0.107635	0.140189	0.148943	0.190812	0.121312	0.148987	0.117797	0.140733	0.210893
AA986860	0	0.0237507	0.00866988	0.0221862	0.0261665	0.00808055	0.00358414	0.00702369	0.00958271	0.0104662	0.0156069	0.0137226	0.00450875	0	0.00343011	0.00533131	0.00137443	0.004335	0.00458291	0	0.00492397	0	0.00447104	0.00336985	0.00584671	0	0.00110783	0.00188658	0.00144255	0.00510982	0	0	0.00512724	0.0240634	0.00343098	0	0.0111171	0	0.00537881	0.00398796	0.00304081	0.00251763	0	0.0247111	0	0.00322024	0.00242416	0.00613244	0.00518577
Gm28857	0	0	0	0	0	0	0	0	0	0	0	0	0	0	0	0	0	0	0	0	0	0	0	0	0	0	0	0	0	0	0	0	0	0	0	0	0	0	0	0	0	0	0	0	0	0	0	0	0
Gm28856	0	0	0	0.00161024	0.00097725	0.00166248	0.00369183	0.0021721	0	0.00215725	0.00949471	0	0	0	0.00122689	0.00152009	0	0	0	0	0.00517835	0.00404594	0.00144575	0.00474647	0.00220409	0.00247113	0	0	0	0.00290461	0	0	0	0	0.00295751	0.0085924	0	0	0.00528407	0.00241157	0	0	0	0.00629779	0	0.00152335	0	0	0.00627724
Fcamr	0	0	0	0	0	0	0	0	0	0	0	0	0	0	0	0	0	0	0	0	0	0	0	0	0	0	0	0	0	0	0	0	0	0	0	0	0	0	0	0	0	0	0	0	0	0	0	0	0
Gm15848	0	0	0	0	0	0	0	0	0	0	0	0	0	0	0	0	0	0	0	0	0	0	0	0	0	0	0	0	0	0	0	0	0	0	0	0	0	0	0	0	0	0	0	0	0	0	0	0	0
Pigr	0	0	0.000752743	0.000970694	0	0	0	0	0	0	0	0	0.000535213	0	0	0.00116575	0	0	0	0	0	0	0	0	0	0	0	0	0	0	0	0	0	0	0	0	0	0	0	0.00348719	0	0	0	0	0	0	0	0	0
Fcmr	0.00893272	0	0	0	0	0.000821905	0	0	0	0	0	0	0	0	0	0	0	0	0	0	0	0.00226939	0	0	0	0.00222323	0	0	0	0	0	0	0	0	0	0	0	0	0	0	0	0	0	0	0	0	0	0	0
Il24	0	0	0	0	0	0	0	0	0	0	0	0	0	0	0	0	0	0	0	0	0.00192573	0	0	0	0	0	0	0	0	0	0	0	0	0	0	0	0	0	0	0	0	0	0	0	0	0	0	0	0
Il20	0	0	0	0	0	0	0	0	0	0	0	0	0	0	0	0	0	0	0	0	0	0	0	0	0	0.00303899	0	0	0	0	0	0	0	0	0	0	0	0	0	0	0	0	0	0	0	0	0	0	0
Il19	0	0	0	0	0	0	0	0.0034783	0	0	0	0	0.00103422	0	0	0	0	0	0	0	0	0	0	0	0	0	0	0	0	0	0	0	0	0	0.00276484	0	0	0	0	0	0	0	0	0	0	0	0	0	0
Il10	0	0	0	0	0	0	0	0	0	0	0	0	0	0	0	0	0	0	0	0	0	0	0	0	0	0	0	0	0	0	0	0	0	0	0	0	0	0	0	0	0	0	0	0	0	0	0	0	0
Mapkapk2	0.701088	0.648146	0.69829	0.589825	0.552171	0.598822	0.525413	0.669474	0.435885	0.452138	0.645228	0.575862	0.503577	0.393057	0.446755	0.554209	0.704622	0.751075	0.582018	0.501801	0.539567	0.478293	0.51395	0.40531	0.393291	0.524157	0.51933	0.550007	0.447138	0.412263	0	0.604023	0.607799	0.587282	0.539368	0.672587	0.469652	0.513058	0.388106	0.434577	0.6001	0.667165	0.629304	0.428513	0.461317	0.601993	0.547742	0.510045	0.441002
Dyrk3	0.0231498	0.0685675	0.0406191	0.0429265	0.0576108	0.0731082	0.0591316	0.0398028	0.0692169	0.122946	0.0531448	0.0492543	0.0400908	0.032115	0.053531	0.0850395	0.0661827	0.0814797	0.0600746	0.109673	0.103938	0.0510163	0.0805332	0.072961	0.103525	0.117225	0.104714	0.0711702	0.106586	0.0906247	0	0.063991	0.0491864	0.051635	0.0585327	0.0389987	0.03565	0.0736356	0.0369774	0.085202	0.0847197	0.0597359	0.160446	0.0651252	0.129251	0.0894882	0.077518	0.0922146	0.100858
Eif2d	0.219956	0.160315	0.197599	0.204656	0.201186	0.203555	0.166147	0.211487	0.256328	0.216905	0.215881	0.173502	0.183773	0.189095	0.233628	0.1766	0.194462	0.208128	0.205056	0.204091	0.203398	0.179469	0.201546	0.22917	0.229848	0.24922	0.196005	0.186859	0.218552	0.179414	0	0.224236	0.202344	0.214205	0.171649	0.219851	0.193769	0.210651	0.255325	0.206231	0.209561	0.194771	0.142573	0.213756	0.155721	0.190006	0.20628	0.230927	0.174073
Rassf5	0.00997944	0	0.0488491	0.0270077	0.0447526	0.00547163	0.00298239	0	0.0061334	0.00512874	0.00307308	0.00473406	0.0365572	0.0309922	0.0206524	0.00875946	0.00166412	0.00428713	0	0.0143742	0.00364476	0.00520811	0.00838496	0.00846617	0.00835911	0.0028613	0.00315147	0.0195116	0.00485238	0.00708126	0	0	0.0344461	0.0170489	0.0378242	0.034502	0	0.00467559	0.00576531	0.00472062	0.00316374	0.00813654	0	0	0	0.00539168	0.00418809	0	0
Ikbke	0.0210501	0.0109949	0.0330055	0.0269579	0.027789	0.0250364	0.0380304	0.0440799	0.00920831	0.0260557	0.0301687	0.029598	0.0194694	0.0397155	0.0473213	0.0254191	0.0562204	0.0514401	0.0367064	0.0286867	0.0354192	0.0243202	0.0119831	0.0139257	0.0215443	0.0230087	0.0215648	0.0144329	0.0157161	0.0120726	0	0.066306	0.0392536	0.0420553	0.0440115	0.0483266	0.00927785	0.01551	0.0085687	0.0309921	0.0536288	0.0497042	0.041439	0.0368868	0.0260784	0.040992	0.013748	0.0260601	0.0437637
Gm28914	0	0	0	0	0	0	0	0	0	0	0	0	0	0	0	0	0	0	0	0	0	0	0	0	0	0	0	0	0	0	0	0	0	0	0	0	0	0	0	0	0	0	0	0	0	0	0	0	0
Gm28913	0	0	0.0023443	0.0012529	0.00182436	0	0.00113634	0	0	0	0	0	0.00127687	0.00229253	0	0.0014262	0	0	0	0	0.00179751	0	0	0.002198	0	0	0	0.00260299	0	0	0	0	0.00168469	0.00374918	0.00431336	0	0	0	0	0	0.0014643	0	0	0	0	0	0.00293684	0	0
Srgap2	0.264044	0.441704	0.351112	0.311769	0.29794	0.231614	0.247506	0.289029	0.279122	0.26251	0.147281	0.25102	0.248624	0.238589	0.21494	0.329932	0.442748	0.378128	0.393511	0.271547	0.279517	0.230152	0.173884	0.202361	0.221547	0.577287	0.408469	0.469677	0.473968	0.428397	0	0.118555	0.539281	0.566539	0.452009	0.15288	0.257462	0.157258	0.154162	0.126576	0.367338	0.445999	0.39299	0.399063	0.314553	0.297069	0.342217	0.362818	0.29575
Fam72a	0.00781069	0.0795535	0.0141344	0.0178944	0.0335091	0.0206956	0.0168601	0.0119826	0.0267228	0.015369	0	0.00875788	0.0105827	0.0121547	0.0309045	0.0298513	0.0258604	0.0364651	0.0358526	0.0224953	0.0345473	0.0153832	0.0214727	0.0183913	0.0330315	0.106402	0.0627353	0.0448799	0.0768257	0.0999548	0	0	0.0226311	0.0309083	0.049743	0.00920721	0.0155769	0.0106776	0.0132889	0.0182698	0.0333421	0.0193955	0.0116265	0.061541	0.0392203	0.0267631	0.0217378	0.0118128	0.0167283
Avpr1b	0	0	0	0	0	0	0	0	0	0	0	0	0	0	0	0	0	0	0	0	0	0	0	0	0	0	0	0	0	0	0	0	0	0	0	0	0	0	0	0	0	0	0	0	0	0	0	0	0
Ctse	0	0	0	0	0	0.00298818	0.00742864	0.0100703	0.00375591	0.0104175	0	0.0048288	0	0	0	0.0158671	0.0158177	0.0110136	0.0116181	0.0222185	0	0.00649378	0.00285039	0	0.00244831	0	0	0.00328184	0.00165295	0	0	0	0	0	0.00231479	0	0	0	0	0	0.00798928	0	0.0256438	0	0.00436823	0.00505073	0.00900621	0.00707291	0
Rab7b	0.0844667	0.0465373	0.116518	0.136294	0.111153	0.0640059	0.0987339	0.0919332	0.052355	0.0862385	0.0345391	0.0299895	0.0237213	0.0390963	0.0282684	0.052648	0.103106	0.195597	0.176543	0.173087	0.0386731	0.0297195	0.0255225	0.0242892	0.0318687	0.0475828	0.0405325	0.0271927	0.0360434	0.024848	0	0	0.0385896	0.0292353	0.0439366	0.0152013	0.00456039	0.0108523	0.0402248	0.00906137	0.0822234	0.13556	0.165302	0.159919	0.158419	0.071994	0.08918	0.100598	0.0695929
Slc26a9	0	0	0	0	0	0	0	0	0	0	0	0	0	0	0	0	0	0	0	0	0	0	0	0	0	0	0	0	0	0	0	0	0	0	0	0	0	0	0	0	0	0	0	0	0	0	0	0	0
Pm20d1	0.0525096	0.0257901	0.0066032	0.00308568	0.00138557	0.0213233	0.0133859	0.00594025	0.0367615	0.0316839	0.0179972	0.00498611	0.00924648	0.00171678	0.006721	0.0268659	0.0191719	0.029542	0.040627	0.028974	0.0197503	0.00625969	0.0113286	0.0112317	0.00504115	0.00613002	0.00467118	0.00476394	0.00387704	0.000712966	0	0	0.00313151	0.0102156	0.00921231	0.022313	0	0.0071801	0.0115653	0.00673701	0.00904124	0.0149561	0.0233313	0.0367525	0.022254	0.0122997	0.0122962	0.0166734	0.0252029
Slc41a1	0.468906	0.336855	0.296485	0.337128	0.396996	0.2444	0.278005	0.322558	0.256725	0.247447	0.29115	0.326691	0.2698	0.325697	0.342434	0.211733	0.23425	0.226855	0.35063	0.288707	0.228866	0.263529	0.27946	0.299945	0.274248	0.184961	0.211976	0.233763	0.269102	0.322897	0	0.527308	0.221726	0.268332	0.340295	0.306242	0.392919	0.24064	0.327555	0.36414	0.207638	0.236346	0.192953	0.216947	0.259302	0.221655	0.203297	0.183461	0.224149
Rab29	0	0.0106756	0.00955217	0.0183806	0.00998525	0.00825276	0.00836795	0.0083525	0.0148578	0.00991364	0.0345846	0.00191935	0.00686396	0.00169079	0.00443527	0.0103486	0.00559646	0.00497768	0.0196685	0.0220318	0.00760867	0.0100666	0.0157169	0.00140896	0.00949765	0.0251223	0.00183438	0.00729083	0.00401486	0.010553	0	0	0.00480187	0.00532597	0.0130148	0.0336121	0	0.0121548	0.0172638	0.0129429	0.0113666	0	0	0.0115568	0.00999193	0.00802735	0.00929568	0.00377572	0.0102253
Nucks1	1.2714	1.39144	1.13784	1.39331	1.32786	1.61786	1.87138	1.35084	1.70592	1.64773	1.47171	1.54865	1.06284	1.34244	1.25013	1.55819	1.67299	1.58956	1.51298	1.57988	2.767	2.64503	2.27689	2.75292	2.50818	6.75754	5.64972	4.68551	5.48519	5.46144	1.64379	0.994319	0.887106	1.26114	1.0067	1.8799	2.17831	2.00989	2.23707	1.96798	1.66397	1.84207	1.49772	1.85739	1.78439	2.22938	2.61731	2.1423	2.75038
Slc45a3	0	0	0.00307568	0.00302645	0.00342175	0.00363858	0	0	0	0	0.00413687	0	0.00088227	0.0029688	0	0.00126735	0.00378422	0	0	0.00270797	0	0	0.00095354	0.00567315	0.000916511	0.00396716	0	0	0.00388832	0.0075692	0	0	0.00717561	0.00579153	0.00101821	0.0093784	0	0	0	0.00179469	0	0.00263925	0	0	0	0	0.00249988	0	0
Elk4	0.377091	0.201457	0.166207	0.287503	0.292016	0.287709	0.16871	0.188434	0.255835	0.236613	0.248493	0.175577	0.1569	0.250533	0.263385	0.259626	0.198213	0.134856	0.26589	0.268713	0.190175	0.165962	0.144943	0.20205	0.234137	0.312603	0.142636	0.136477	0.278296	0.304302	0	0.104498	0.224599	0.403574	0.35964	0.274934	0.126751	0.152449	0.228762	0.257101	0.233043	0.161446	0.243508	0.303435	0.350213	0.270286	0.156172	0.142775	0.306003
Mfsd4a	0.0973385	0.117135	0.0545618	0.112928	0.0952275	0.134438	0.105408	0.0769067	0.10481	0.171364	0.0865144	0.0771553	0.0777267	0.0800355	0.139538	0.137924	0.121928	0.116698	0.172563	0.204533	0.0883586	0.0753331	0.066105	0.105169	0.113698	0.105527	0.0719522	0.065458	0.0800989	0.126905	0.821895	0.0735381	0.0676105	0.102476	0.14168	0.084017	0.16829	0.050781	0.0860486	0.088315	0.12025	0.146948	0.131792	0.227761	0.142562	0.0986287	0.0900127	0.0915982	0.141384
Gm26892	0	0	0.00143114	0.00109205	0	0	0	0	0	0.00151123	0.00294616	0	0.00229847	0	0	0	0.00422245	0	0.00437846	0	0	0	0	0	0	0	0	0	0.00135908	0.00400693	0	0	0	0	0.00247466	0	0	0	0	0	0.00208575	0	0.0160585	0	0	0.00174765	0	0	0
Cdk18	0.00822728	0.0213351	0.00374115	0.00225281	0.00737816	0.0218789	0.0195052	0.0177847	0.0259227	0.0222428	0.0140698	0.0112324	0.00316339	0.00306121	0	0.0341367	0.0162352	0.0145813	0.0145319	0.0181906	0.0361872	0.0227751	0.0118588	0.00740221	0.0125457	0.00991781	0.0118827	0.00880537	0.00224366	0.00348568	0	0	0.000690129	0	0.00294133	0.0214279	0.0136267	0.00422011	0.00866125	0.00655436	0.0310905	0.0356539	0.0104046	0.0199497	0.0505048	0.0175687	0.033481	0.0625515	0.0228307
Gm29629	0	0	0	0	0	0	0	0	0	0	0	0	0	0	0	0	0	0	0	0	0	0	0	0.00142097	0	0	0	0	0	0	0	0	0	0	0	0	0	0	0	0	0	0	0	0	0	0	0	0	0
Lemd1	0	0	0	0	0	0.00671789	0.00295916	0.00129702	0	0	0.00312477	0	0	0	0	0.00766691	0.00879127	0	0	0.00198725	0	0	0	0	0.00090596	0.00434961	0.00159907	0	0	0	0	0	0	0	0	0	0	0	0	0	0.00997034	0.0035093	0	0	0	0.0101101	0.00646725	0	0
1700037F24Rik	0	0	0	0	0	0	0	0	0	0	0	0	0	0	0	0	0	0	0	0	0	0	0	0	0	0	0	0	0	0	0	0	0	0	0	0	0	0	0	0	0	0	0	0	0	0	0	0	0
Gm10188	0	0	0	0	0	0	0	0	0	0	0	0	0	0	0	0	0	0	0	0	0	0	0	0	0	0	0	0	0	0	0	0	0	0	0	0	0	0	0	0	0	0	0	0	0	0	0	0	0
Gm29630	0	0	0	0	0	0	0	0	0	0	0	0	0	0	0	0	0	0	0	0	0	0	0	0	0	0	0	0	0	0	0	0	0	0	0	0	0	0	0	0	0	0	0	0	0	0	0	0	0
Klhdc8a	0	0	0.0013548	0.00100902	0	0	0	0	0	0	0	0	0	0.00285955	0	0	0.00258081	0	0	0	0	0	0	0	0	0	0	0	0	0	0	0	0	0	0	0	0	0	0	0	0	0	0	0	0	0	0	0	0
Nuak2	0.0108109	0.0126943	0.000284252	0	0.0016332	0.00948848	0.0022726	0.00320918	0.00374365	0.00297429	0.00753426	0.00499308	0	0	0.00180622	0.025123	0.0152633	0.0660788	0.0755007	0.0212863	0.0128393	0.00336972	0.00132629	0	0.00331238	0.0233144	0	0	0.00260479	0.000991193	0	0	0	0	0	0	0	0	0	0	0.00857464	0.0242833	0.0200185	0.00520313	0.0209291	0.0166472	0.0103501	0.00481404	0.0105994
F730311O21Rik	0	0	0	0	0	0	0	0	0	0	0	0	0	0	0	0	0	0	0	0	0	0	0	0	0	0	0	0	0	0	0	0	0	0	0	0	0	0	0	0	0	0	0	0	0	0	0	0	0
Tmcc2	0.0965215	0.0363489	0.0433183	0.0538486	0.0617495	0.0248717	0.0226938	0.0294587	0.0139772	0.0523779	0.06156	0.0256044	0.0468743	0.0348153	0.0583401	0.0183978	0.0264508	0.0219669	0.0395652	0.0597665	0.0273982	0.0245716	0.0380449	0.0124038	0.0429374	0.0227299	0.0195918	0.0312438	0.019167	0.0430808	0	0.130297	0.0816762	0.0718091	0.0969466	0.0192812	0.0198598	0.0290046	0.0271197	0.049042	0.0187628	0.0318639	0.0274466	0.0193216	0.0505961	0.0240355	0.0309869	0.0226007	0.0319343
Gm15849	0	0	0	0	0	0	0	0	0	0	0	0	0	0	0	0	0	0	0	0	0	0	0	0	0	0	0	0	0	0	0	0	0	0	0	0	0	0	0	0	0	0	0	0	0	0	0	0	0
Dstyk	0.304758	0.36673	0.359542	0.346189	0.367946	0.234716	0.315171	0.334908	0.264658	0.293019	0.218541	0.250091	0.238621	0.216629	0.26682	0.307156	0.384278	0.391552	0.313828	0.405221	0.187218	0.194695	0.175958	0.178672	0.215982	0.330968	0.194457	0.272875	0.279647	0.239373	0	0.349359	0.334858	0.277457	0.458054	0.231888	0.180664	0.183429	0.160643	0.246414	0.268132	0.320795	0.345325	0.272192	0.300245	0.217255	0.241005	0.237943	0.237203
Rbbp5	0.082589	0.0714455	0.0762666	0.113159	0.116048	0.148639	0.111134	0.112951	0.0705829	0.195395	0.12486	0.0788607	0.0784685	0.0913639	0.0841119	0.171337	0.134291	0.165054	0.174686	0.174323	0.123872	0.115494	0.0895726	0.132892	0.142667	0.185396	0.157451	0.103743	0.150783	0.189032	0	0.382743	0.108348	0.0834684	0.124504	0.137791	0.0894864	0.0733715	0.0827432	0.118288	0.133503	0.144022	0.184741	0.210039	0.155269	0.143574	0.142644	0.123058	0.101747
Tmem81	0.017066	0	0.00322958	0.00232476	0.0137975	0.00470394	0	0	0.00642279	0.0182196	0	0	0.00154581	0.00459328	0.00501682	0.0112146	0.00821989	0	0	0.00301251	0.00501712	0	0.0008593	0.0021472	0.00437123	0.0114869	0.00234841	0.00219024	0.00106153	0.00662309	0	0	0.0104149	0.00361119	0.00945455	0	0	0.00239963	0.00423113	0.00528584	0.0130541	0	0	0.0215436	0.00990921	0.00688222	0.00872529	0	0
Cntn2	0	0	0.0062394	0.00289019	0.00604605	0.00201737	0	0	0	0	0	0	0	0.00169079	0.00105152	0.00213509	0	0	0	0	0	0.00693532	0.00233505	0	0.00316962	0	0.0080587	0.00107175	0	0.0096233	0	0	0	0.00135285	0	0	0.0301265	0.00147182	0.0069965	0.00513815	0	0.00336916	0	0	0.00354945	0	0	0	0
Nfasc	0	0	0.00552408	0.0020401	0.00718115	0	0.00233764	0.00476155	0.00492211	0.00744476	0	0	0.00113422	0.00203297	0.00298739	0	0	0	0.00692154	0	0	0.00298902	0.00222087	0.00421326	0.00542028	0.00608347	0.00144774	0.00393914	0	0.00130345	0	0	0	0	0	0	0.00343156	0.00221214	0.00617598	0.00561703	0.00183191	0.00249092	0.012788	0	0	0	0	0	0
Gm10538	0	0	0	0	0	0	0	0	0	0	0	0	0	0	0	0	0	0	0	0	0	0	0	0	0	0	0	0	0	0	0	0	0	0	0	0	0	0	0	0	0	0	0	0	0	0	0	0	0
Lrrn2	0.0136224	0.0224261	0.0448421	0.0472044	0.0622677	0.00927389	0.00743449	0.0112657	0.00976707	0.0381409	0.00539933	0	0.0195517	0.0364409	0.100676	0.00606803	0.00266173	0	0.0134799	0.000917438	0.0200976	0.00489749	0.00524071	0.0208866	0.0809987	0.00193517	0.00540486	0.0069546	0.0225271	0.0311212	0	0	0.0468691	0.0879393	0.0923156	0.0125876	0	0.0206986	0.0583628	0.0855708	0.00227872	0	0	0.00583963	0	0.00638753	0.00792375	0	0.00879976
Mdm4	0.637427	0.819022	0.554683	0.553453	0.569768	0.50114	0.702104	0.648275	0.64793	0.588865	0.504624	0.725848	0.495856	0.516567	0.54891	0.510289	0.721116	0.774734	0.553993	0.631013	0.408298	0.456674	0.480327	0.406314	0.477858	0.661662	0.717004	0.730595	0.682914	0.647284	0.821895	1.42349	0.587564	0.634909	0.587811	0.494978	0.489362	0.45462	0.41771	0.415398	0.448074	0.738376	0.680929	0.580712	0.55726	0.47222	0.653744	0.64345	0.47773
Pik3c2b	0.00858926	0.032353	0.0320148	0.0353568	0.0290245	0.0230026	0.0297	0.0194265	0.0335597	0.0288908	0.0290576	0.0296857	0.0231054	0.0260187	0.0235329	0.00285274	0.0188343	0.0298092	0.0329713	0.015129	0.0075728	0.0215997	0.0222021	0.0346533	0.0283416	0.00734478	0.0131812	0.0182879	0.0230176	0.00871239	0	0	0.0346397	0.0421311	0.0229617	0.0170267	0.0952878	0.0104461	0.0119817	0.0226146	0.00500453	0.0167064	0	0.0254514	0.0250364	0.017847	0.0204145	0.0168989	0.0373602
Gm28609	0	0	0	0	0	0	0	0	0	0	0	0	0	0	0	0	0	0	0	0	0	0	0	0	0	0	0	0	0	0	0	0	0	0	0	0	0	0	0	0	0	0	0	0	0	0	0	0	0
Ppp1r15b	0.448944	0.350682	0.193607	0.268865	0.303662	0.256366	0.280314	0.317525	0.268138	0.264103	0.256511	0.242641	0.229416	0.361041	0.282501	0.262616	0.314872	0.317568	0.261068	0.315189	0.288955	0.209526	0.212156	0.233885	0.30151	0.246175	0.23196	0.226674	0.277013	0.349847	0	0.52252	0.231715	0.275539	0.365942	0.243079	0.222431	0.211064	0.201027	0.277508	0.317762	0.368509	0.330903	0.461541	0.241734	0.314777	0.276988	0.301338	0.264655
Plekha6	0	0.0113355	0.00875443	0.00867493	0.00379924	0.00796123	0.00133576	0.0171863	0.014858	0	0	0	0.00215821	0.00709637	0.00149367	0.00473589	0.0143956	0.0107353	0	0.00357807	0.00166405	0.00124814	0.00221994	0.00302268	0.00171298	0.0026736	0.0107335	0.00477605	0.00858638	0.00247606	0	0	0	0.00257318	0.00202227	0.00701084	0	0.00178206	0.0028505	0	0.00884169	0	0.0231313	0.00911668	0.0101931	0.00861379	0.00708107	0	0.00741756
Gm19461	0	0	0	0.00059512	0	0	0	0	0	0	0	0	0	0	0	0.00151987	0	0	0	0	0	0	0	0	0	0.0026736	0	0	0	0.00149843	0	0	0	0	0	0	0	0	0	0	0	0	0	0	0	0	0	0	0
Golt1a	0	0	0	0	0	0	0	0	0	0	0	0	0	0	0	0	0	0	0	0	0	0	0	0	0	0	0	0	0	0	0	0	0	0	0	0	0	0	0	0	0.00195733	0.00272165	0	0	0	0	0	0	0
Kiss1	0	0	0	0	0	0	0	0	0	0	0	0	0	0	0	0	0	0	0	0	0	0	0	0	0	0	0	0	0	0	0	0	0	0	0	0	0	0	0	0	0	0	0	0	0	0	0	0	0
Gm28040	0	0	0	0	0	0	0	0	0	0	0	0	0	0	0	0	0	0	0	0	0	0	0	0	0	0	0	0	0	0	0	0	0	0	0	0	0	0	0	0	0	0	0	0	0	0	0	0	0
Kiss1.1	0	0	0	0	0	0	0	0	0	0	0	0	0	0	0	0	0	0	0	0	0	0	0	0	0	0	0	0	0	0	0	0	0	0	0	0	0	0	0	0	0	0	0	0	0	0	0	0	0
Ren1	0	0	0	0	0	0	0	0	0	0	0	0	0	0	0	0.00117888	0	0.00333361	0	0	0	0	0.00283007	0	0	0.00631761	0.00409165	0	0	0	0	0	0	0	0.00376785	0	0	0	0	0	0.00328955	0.00329079	0	0	0.00240101	0.00152546	0	0	0.00556892
Etnk2	1.53197	1.53098	0.408429	0.482674	0.525007	1.65692	1.57048	1.67785	1.38851	1.48531	0.952057	0.729247	0.392783	0.355634	0.424199	1.71685	2.14525	2.43911	2.07996	2.49188	1.17043	0.704916	0.72027	0.571191	0.704308	1.21848	0.751754	0.739727	0.57328	0.7656	0	0.47937	0.154817	0.13352	0.184088	0.841842	0.436097	0.663142	0.605791	0.575393	1.94003	2.16024	2.49474	1.59986	1.83939	1.63773	1.44498	1.62307	1.32381
Sox13	0	0.0132076	0.00950943	0.0123465	0.023161	0.0301428	0.0288675	0.0331427	0.0314529	0.0436894	0.0161327	0.00185693	0.00679156	0.00643258	0.00869069	0.0448123	0.0389575	0.012668	0.0372216	0.0378729	0.0361133	0.0319837	0.0169471	0.0118072	0.0199469	0.0460123	0.00679455	0.00684039	0.00162218	0.0126764	0	0	0.0138158	0.0150462	0.017414	0.0171324	0.00797693	0.00469871	0.0127861	0.0160015	0.0314272	0.0436823	0.0448775	0.0357023	0.0561049	0.0430458	0.0465972	0.0519464	0.0269336
Snrpe	3.16163	2.40005	3.35436	3.07445	3.23949	3.76979	3.38649	3.0556	3.19139	3.63543	3.67052	3.21072	4.3294	3.81016	4.11266	3.82637	3.40057	2.77064	2.95387	3.36506	4.40691	4.75196	4.84482	5.07788	5.23215	4.54106	5.24275	5.18176	5.31972	5.66272	2.46569	1.88354	3.84355	3.27827	3.71913	4.30665	4.59593	5.0097	4.88932	5.26943	4.04512	3.63083	3.35324	3.64177	3.94932	4.23555	3.98346	3.43407	3.9323
Gm26706	0.00883555	0	0	0.000915333	0.00186992	0.00490179	0.00884385	0	0.0104886	0.00185169	0.00462158	0	0.00271345	0.00477079	0.0030565	0.00349392	0.00503925	0	0	0.00250829	0.00222259	0	0	0	0.00334463	0.00371784	0.00703134	0.00121909	0.00384887	0.0027172	0	0	0.00305869	0.0020598	0.00467083	0	0	0.0030256	0	0.00153438	0	0	0	0	0.00351809	0.00284784	0.0021216	0.00361654	0.00514468
Zc3h11a	0.0658928	0.0338497	0.0364479	0.0667372	0.0680074	0.0605038	0.0610788	0.0478598	0.0539772	0.0816487	0.106053	0.0668477	0.0354696	0.0646244	0.104238	0.0770704	0.0593098	0.0207377	0.102194	0.117322	0.0472453	0.0571631	0.0638613	0.0581814	0.0610718	0.0777423	0.0353217	0.0508425	0.0616218	0.0707793	0	0.0961686	0.0597224	0.119392	0.0819765	0.0685506	0.0834651	0.0530333	0.10943	0.0669599	0.0549249	0.0409619	0.072996	0.0840688	0.111601	0.0757042	0.0397729	0.0514895	0.0942545
Zc3h11a.1	0	0	0	0	0	0	0	0	0	0	0	0	0	0	0	0	0	0	0	0	0	0	0	0	0	0	0	0	0	0	0	0	0	0	0	0	0	0	0	0	0	0	0	0	0	0	0	0	0
Gm38394	0.0461903	0.0506411	0.0211957	0.05863	0.0441698	0.0434666	0.0522254	0.0506022	0.0486693	0.0658994	0.0558077	0.0481538	0.039336	0.08033	0.0401295	0.056438	0.0618125	0.0263724	0.0809575	0.0534408	0.0275169	0.0677865	0.0470148	0.0480353	0.0520354	0.0272764	0.0307461	0.0407333	0.0513251	0.0368787	0.821895	0	0.0517613	0.079801	0.0567256	0.0151078	0.01433	0.0348514	0.0475625	0.0470323	0.0259152	0.0522049	0.0753917	0.0810378	0.0797328	0.0331149	0.0303407	0.0302329	0.0661657
Zbed6	0	0	0	0	0	0	0	0	0	0	0	0	0	0	0	0	0	0	0	0	0	0	0	0	0	0	0	0	0	0	0	0	0	0	0	0	0	0	0	0	0	0	0	0	0	0	0	0	0
Lax1	0.0136224	0	0.00770032	0.0038394	0.00603268	0.00179213	0	0	0.0105334	0.00488845	0.0113791	0	0.00447816	0.00522204	0.00248337	0.0028493	0.00166817	0	0	0	0.00228333	0.00195989	0.0019481	0.00550775	0.00208829	0.00277498	0.00156042	0.000404928	0.00250661	0.00302833	0	0	0.00450894	0.00629701	0	0.00701084	0.00424748	0.00696697	0.00436166	0.003942	0.00538331	0	0	0	0.0133743	0.00681109	0.00239837	0.00512678	0.00879976
Atp2b4	0.212165	0.125882	0.465799	0.513908	0.523724	0.15924	0.0713652	0.157274	0.196998	0.100638	0.0528063	0.0593228	0.160613	0.251127	0.218529	0.254505	0.129557	0.252588	0.231107	0.216228	0.164791	0.0478515	0.104555	0.141386	0.105168	0.276531	0.0571515	0.190896	0.171949	0.158644	0	0.304036	0.415528	0.409353	0.438342	0.114744	0.067968	0.170036	0.191039	0.143872	0.385299	0.169818	0.363948	0.248796	0.241695	0.233516	0.163995	0.137385	0.202863
Gm28441	0	0	0	0	0	0	0	0	0	0	0	0	0	0	0	0	0	0	0	0	0	0	0	0	0	0	0	0	0	0	0	0	0	0	0	0	0	0	0	0	0	0	0	0	0	0	0	0	0
Optc	0	0	0.00369584	0.00156233	0	0	0	0.00283969	0	0	0	0	0	0	0	0	0	0.00918841	0	0	0	0	0.00294603	0.00167198	0.00114622	0	0	0.00109329	0	0	0	0	0	0	0	0	0	0	0.00517741	0.00187722	0	0	0	0.0107241	0	0	0	0	0.00388819
Gm15851	0	0	0	0	0	0	0	0	0	0	0	0	0	0	0	0	0	0	0	0	0	0	0	0	0	0	0	0.00127017	0	0	0	0	0	0	0	0	0	0	0	0	0	0	0	0	0	0	0	0	0
Prelp	0.0477767	0.0437558	0.0847382	0.0433632	0.0185735	0.00526661	0.00151024	0.00408092	0	0.00388478	0	0	0.00686724	0.00174088	0.00787674	0.00813896	0.00604061	0.0376994	0	0.0231177	0.00197726	0.00553831	0.00330281	0.0012871	0.0035682	0.0195173	0.00654342	0.0170732	0.00155503	0.00875278	0	0	0.0105302	0	0.0033941	0	0	0.0168697	0.00260265	0.0104647	0.00357197	0.00341767	0.00933221	0	0.00334816	0.00949854	0.00509052	0.030304	0
Gm1627	0	0	0	0	0	0	0	0	0	0	0	0	0	0	0	0	0	0	0	0	0	0	0	0	0	0	0	0	0	0	0	0	0	0	0	0	0	0	0	0	0	0	0	0	0	0	0	0	0
Fmod	0.0176687	0	0.00495249	0.00297459	0.00281719	0	0	0	0	0	0.00597693	0	0.0019195	0	0	0.00374382	0.00265862	0.00509797	0	0.00267443	0	0	0.00220443	0.00228987	0	0.00274979	0	0.00327765	0.00309917	0	0	0.0935769	0.00142958	0	0	0	0.00413354	0.00112099	0	0	0.00178473	0	0	0	0	0	0.00176631	0	0
Btg2	9.3515	7.03904	4.20393	11.9744	9.15476	1.9859	2.57024	3.51912	7.95704	4.77263	2.88594	3.80405	2.73545	6.7925	3.87854	3.41548	3.38335	5.19722	11.5369	7.68802	1.93511	1.63406	1.5594	3.61331	2.26651	1.93614	1.17063	1.98722	3.35125	3.81686	0	6.15988	2.47744	6.51359	4.26877	2.1734	1.50048	2.01317	3.86435	2.69497	2.10797	2.74032	4.12556	5.85034	4.32698	1.7832	2.33578	3.33752	6.69155
Chit1	0	0	0	0	0	0	0	0	0	0	0	0	0	0	0	0.000884499	0.00366428	0	0	0.00343684	0.0019682	0	0	0	0	0.00678054	0	0.00118935	0	0	0	0	0	0	0	0	0	0	0	0	0	0	0	0	0.00628642	0	0	0	0
Chil1	0	0	0	0	0.000766593	0	0	0.00266305	0	0	0	0	0	0	0	0	0	0	0	0	0	0	0	0	0	0.00503524	0	0	0	0	0	0	0	0	0	0	0	0	0	0	0	0.00836731	0	0	0	0	0	0	0
Mybph	0	0	0	0	0	0	0	0	0	0	0	0	0	0	0	0.00116318	0	0	0.00512301	0	0	0	0	0	0	0	0	0	0	0	0	0	0	0	0	0	0	0	0	0	0	0	0	0.0138629	0	0	0	0	0
Adora1	0	0	0.00383863	0.000830255	0.004824	0.0205835	0.00606855	0.00567774	0.00382644	0.00495819	0	0.0017464	0.00467635	0.00444421	0	0.0565274	0.0386954	0.0296735	0.024427	0.0383082	0.0318357	0.00352945	0.00679609	0.00965486	0.00345063	0.0606065	0.00462893	0.011556	0.00953722	0.00521859	0	0	0	0	0	0	0	0.00154718	0.0057601	0.00448353	0.0683083	0.0332642	0.0103849	0.0415148	0.0296902	0.0498242	0.0250099	0.032561	0.00585694
Myog	0	0	0	0.00078821	0	0	0	0	0	0	0	0	0	0	0	0	0	0	0	0	0	0	0	0	0	0	0	0	0	0	0	0	0	0	0	0	0	0	0	0	0	0	0	0	0	0	0	0	0
Ppfia4	0	0	0.00141757	0.00078821	0.00112642	0.00261508	0.00339807	0	0	0	0.00325639	0.00227733	0.00153427	0.00497531	0	0.00322037	0.00212684	0	0	0	0.0019255	0.00411884	0.00310318	0	0.00393376	0	0.00119253	0.0022343	0.00195736	0	0	0	0	0.00349792	0	0	0	0.000945085	0.00165681	0.00288334	0.00329918	0	0	0	0	0	0.0028411	0.0109097	0
Tmem183a	0.384284	0.255654	0.339755	0.342227	0.314491	0.322705	0.320711	0.319411	0.2548	0.382072	0.279896	0.281947	0.293123	0.292081	0.308061	0.304753	0.35565	0.438332	0.33312	0.335241	0.301674	0.401071	0.334621	0.308721	0.374667	0.339663	0.374713	0.368572	0.383364	0.43316	0	0.240794	0.319012	0.292439	0.36458	0.247198	0.438447	0.31064	0.312824	0.334366	0.312682	0.330452	0.258811	0.287205	0.302453	0.3003	0.377465	0.345686	0.305787
4933406M09Rik	0	0	0.00103766	0	0	0	0	0	0	0	0	0	0.00236448	0	0	0	0	0	0	0	0	0	0	0	0	0	0	0	0	0	0	0	0	0	0	0	0	0	0	0	0	0	0	0	0	0	0	0	0
Cyb5r1	0.0899182	0.0456459	0.0816231	0.0550379	0.0548194	0.0769609	0.0896926	0.109042	0.0492925	0.0591223	0.0422821	0.0496975	0.0499841	0.0260096	0.0464741	0.0748675	0.110585	0.118967	0.0821389	0.0652732	0.0636644	0.0707667	0.104816	0.0618159	0.0546969	0.0529319	0.0479956	0.0808219	0.0491716	0.048447	0	0	0.0731419	0.0640775	0.0334666	0.0489747	0.0725451	0.0508272	0.0245988	0.0430916	0.0686874	0.0961665	0.105581	0.0520498	0.0930699	0.0983493	0.0863937	0.0913289	0.0801943
Adipor1	0.833114	0.662256	0.586409	0.730309	0.727	0.642424	0.48801	0.549745	0.572285	0.547472	0.685811	0.508521	0.519824	0.765894	0.754436	0.689515	0.566	0.570753	0.660269	0.704017	0.621962	0.511266	0.522464	0.710665	0.622524	0.718385	0.50047	0.591446	0.668222	0.708544	0.821895	0.727638	0.586619	0.782832	0.742608	0.740693	0.54731	0.548243	0.600564	0.668587	0.683454	0.542631	0.405507	0.651562	0.670328	0.556655	0.481874	0.565946	0.526351
Platr1	0	0.0304484	0.00487758	0.00213178	0.00315209	0.000776921	0	0	0.00782701	0	0.00323267	0	0.00138667	0	0	0.00139145	0	0	0	0	0	0.00568117	0.00322983	0	0	0	0.00541129	0.00203913	0	0	0	0	0.0012449	0.00611177	0.00222915	0	0	0.00247991	0	0.00408473	0	0	0	0	0	0.00357847	0.00542849	0	0
Klhl12	0.381279	0.500354	0.219198	0.22092	0.184066	0.362117	0.359567	0.363423	0.334599	0.282553	0.369783	0.291504	0.249218	0.200845	0.168706	0.334438	0.414501	0.474363	0.258142	0.336319	0.23699	0.247196	0.237352	0.175579	0.218209	0.335684	0.275368	0.25109	0.219439	0.267929	0	0.324375	0.245579	0.188822	0.237261	0.160036	0.150949	0.222888	0.187774	0.230762	0.344067	0.369454	0.417506	0.267942	0.421434	0.305226	0.372858	0.440524	0.342729
Rabif	0.116415	0.0819555	0.147839	0.126142	0.155357	0.120692	0.114362	0.119188	0.096765	0.117228	0.122211	0.094128	0.129192	0.109599	0.129106	0.111287	0.0844474	0.0776957	0.0854956	0.135462	0.128498	0.167819	0.164881	0.143627	0.147234	0.132899	0.126286	0.119893	0.10846	0.136689	0	0.111199	0.170684	0.112077	0.128868	0.11928	0.157679	0.167284	0.131244	0.20896	0.114101	0.115191	0.102603	0.0990143	0.135383	0.105235	0.108012	0.195229	0.119909
Mgat4e	0	0	0	0	0	0	0	0	0	0	0	0	0	0	0	0	0	0	0	0	0	0	0	0	0	0	0	0	0	0	0	0	0	0	0	0	0	0	0	0	0	0	0	0	0	0	0	0	0
Kdm5b	2.18479	1.91669	1.45863	1.55458	1.29529	2.5072	2.00136	1.56115	1.53752	1.4514	1.91005	1.36749	1.40713	1.27746	1.2069	2.814	2.67992	2.36736	1.93909	1.88451	1.134	0.843467	0.666126	0.683904	0.657798	1.60354	0.900032	0.75455	0.818669	0.669079	2.46569	2.13366	1.82723	1.52156	1.5935	1.88357	1.10053	1.03235	1.0929	1.10569	2.63233	2.42624	1.98915	2.20381	1.76263	1.84468	1.21875	0.991395	1.11335
Gm26783	0	0	0	0	0	0	0	0	0	0	0	0	0	0	0	0.00123472	0	0	0	0	0	0	0	0	0	0	0	0	0	0	0	0	0	0	0	0	0	0	0	0	0	0	0	0	0	0	0	0	0
Syt2	0.035458	0.0123018	0.00199193	0.0121009	0.00285843	0.00997274	0.00766725	0.0100374	0	0.00534182	0.00322049	0.00541707	0.00491745	0.00769738	0.00320427	0.0193543	0.0182384	0.010688	0.00550187	0.0199129	0.0240922	0.00942227	0.00430257	0.00193257	0.00534135	0.0154207	0.0141205	0.00227193	0.0089667	0.00516333	0	0	0.00401565	0.00630277	0.00600633	0	0.0515642	0.0015072	0.00717834	0	0.0176051	0.0169288	0.00895833	0.0112368	0.00828763	0.020915	0.0128274	0.026865	0.0184261
Ppp1r12b	0.35881	0.203274	0.171597	0.367446	0.332064	0.147187	0.17778	0.162688	0.115105	0.148431	0.162828	0.149073	0.128551	0.167502	0.199753	0.15188	0.216826	0.228821	0.165618	0.145923	0.111709	0.145008	0.177956	0.138595	0.113076	0.126558	0.135254	0.15388	0.154119	0.150477	0	0.0522488	0.228382	0.337478	0.25077	0.103997	0.169954	0.0985016	0.158676	0.156752	0.150812	0.17474	0.173376	0.176536	0.128245	0.148693	0.144218	0.163605	0.10751
Gm28892	0	0	0	0	0	0	0	0.00218277	0	0	0	0	0	0.00146991	0	0	0	0	0	0	0	0	0.0010631	0	0	0	0	0	0	0	0	0	0	0	0	0	0	0	0	0	0.00318329	0	0	0	0	0	0	0	0
Ube2t	0.0109367	0.0110304	0.0127196	0.0346342	0.0273883	0.0244697	0.0222644	0.00675861	0.0108174	0.0176337	0.0355911	0.017326	0.00794753	0.0230326	0.0192707	0.0126763	0.00989526	0.0137585	0.0154148	0.0251894	0.188137	0.0765737	0.0859594	0.181801	0.159106	0.333572	0.188636	0.216267	0.329965	0.487103	0	0	0.00898385	0.0310382	0.0223103	0.0112165	0.0376975	0.0328923	0.0340218	0.0406251	0.0277691	0.0294947	0.00711731	0.00580937	0.0286538	0.0701325	0.0569456	0.0367784	0.0751922
Lgr6	0	0.145187	0.631479	0.474677	0.33665	0.00162799	0.00225893	0.0692674	0.0179161	0.0108256	0.00316923	0.0161737	0.13892	0.114748	0.0762208	0	0.00168032	0.0112968	0.0117932	0.00385374	0	0.00912041	0.137465	0.062322	0.0283534	0	0.00532696	0.230817	0.0618554	0.0456692	0	0.356136	0.109435	0.128111	0.0830675	0	0	0.207287	0.0819932	0.0470012	0.00220486	0.0100207	0	0	0.00379865	0.00372325	0.00148708	0.0151861	0
Gm10535	0	0	0	0	0.000627267	0	0	0	0	0	0	0	0	0	0	0.00141572	0	0	0	0	0	0	0	0	0	0	0	0	0	0	0	0	0	0	0	0	0	0	0	0	0	0	0	0	0	0	0	0	0
Ptpn7	0	0	0.00113758	0.00541285	0.00162801	0.00594149	0	0.00219914	0	0	0	0.00203344	0.000912942	0	0	0.00100027	0.00255686	0	0.00517721	0.00347583	0.00215462	0	0	0.00272379	0.000992041	0.00509843	0	0	0	0	0	0	0	0	0	0	0	0.00373529	0	0	0.00607339	0.00328077	0	0.00666445	0	0.00947804	0.00207359	0	0
Arl8a	0.535289	0.284255	0.421034	0.451031	0.472314	0.357829	0.220048	0.278299	0.28274	0.306972	0.369331	0.197921	0.249578	0.269569	0.345895	0.413945	0.274619	0.297601	0.392825	0.316814	0.265977	0.122968	0.166269	0.166068	0.204159	0.381723	0.16002	0.195656	0.255819	0.282529	0	0.593812	0.412889	0.404552	0.636405	0.297698	0.100854	0.195191	0.283118	0.26263	0.369343	0.246467	0.237758	0.292598	0.256108	0.320652	0.151208	0.258348	0.215448
Gm15445	0	0.00799524	0.00585506	0.0120712	0	0.00369352	0.0031809	0.00268475	0	0.00238611	0	0.0072551	0.00204679	0.0128775	0.00193293	0.00208632	0.00306824	0	0.0154622	0	0.00534559	0.00612445	0.00262965	0	0.00277863	0.00187521	0	0	0.00530257	0.000626671	0	0.214188	0.000947144	0.0115256	0.0141681	0	0.00414405	0.00306062	0	0	0.00326941	0.00326699	0	0.00786277	0	0	0.00221145	0	0
Gpr37l1	0	0	0	0	0	0	0	0	0	0	0	0	0	0.0019341	0	0	0	0	0	0	0	0	0	0	0	0	0	0	0	0	0	0	0	0	0	0	0	0	0	0	0	0	0	0	0	0	0	0	0
Gm26642	0	0	0	0	0	0	0.00109608	0	0	0	0	0	0.00128537	0	0	0	0.00138036	0	0	0	0	0	0	0.00225838	0.00159217	0	0	0.000772347	0	0.00111123	0	0	0	0	0	0	0	0.0011507	0	0	0	0	0	0	0.00366614	0	0	0	0
Elf3	0	0	0.036609	0.025661	0.0350196	0.0385936	0.0452437	0.0800555	0.0509149	0.0496649	0.0500671	0.0534939	0.0676803	0.0454194	0.0513837	0.0298078	0.0328886	0.0978052	0.0589529	0.0495113	0.0327229	0.0574866	0.242791	0.140094	0.103232	0.0285021	0.0432178	0.0913954	0.0581932	0.0523913	0	0	0.0147951	0.00256255	0.00333844	0.0931205	0.0367763	0.275316	0.122571	0.118235	0.0311639	0.0442667	0.0553637	0.0501098	0.0266334	0.0337628	0.0285054	0.119387	0.107846
Rnpep	0.223302	0.235751	0.473515	0.367159	0.480521	0.337868	0.303457	0.390022	0.330101	0.407367	0.395942	0.430022	0.958412	0.953127	1.12743	0.274823	0.239291	0.387537	0.252962	0.393725	0.360839	0.429602	0.75851	0.746535	0.67369	0.374359	0.458886	0.686687	0.686493	0.705173	0.821895	0.185639	0.517585	0.450129	0.655501	0.309493	0.396512	0.723595	0.71448	0.746198	0.336913	0.3027	0.322891	0.377069	0.315435	0.381357	0.310835	0.432209	0.376076
Timm17a	0.84708	0.718762	0.825435	0.891541	1.07525	0.850243	0.825424	0.729243	0.911763	0.954893	0.836146	0.731598	0.79238	1.07155	1.04652	0.898316	0.766255	0.779701	0.887749	1.01992	0.902386	0.809467	0.851423	1.04926	1.17786	0.972918	0.827483	0.818792	1.03455	1.13773	1.64379	0.524732	0.659747	0.805999	0.886111	0.904427	0.779857	0.798896	1.15898	1.09107	0.873375	0.787824	0.722682	0.936351	1.00669	0.976801	0.861527	0.895051	0.85018
Lmod1	0	0.0115382	0.0167894	0.0103952	0.0219738	0.00156969	0.00561149	0	0	0.00674339	0.00837022	0.00582015	0.00551765	0.00842065	0.00494833	0.00496483	0.0041877	0.00811581	0	0.0168172	0.00217207	0.00188584	0.012858	0.00208078	0.00555907	0.00385044	0	0.000853342	0.00787778	0.00597031	0	0	0.00283489	0.00274918	0.00996554	0.0102051	0.0201728	0.00524305	0.00893128	0.00624366	0.00354023	0.0138582	0	0.00585924	0	0.00624169	0.00912329	0	0.00606397
Shisa4	0.234747	0.0433447	0.16128	0.21814	0.230063	0.043228	0.0203686	0.0231792	0.0215661	0.0336213	0.0524127	0.0282048	0.0499968	0.0612273	0.0853442	0.0423151	0.0283972	0.0482629	0.0632085	0.0215335	0.0640072	0.0395741	0.0480261	0.0821466	0.0519779	0.0670353	0.0408269	0.0444376	0.0512406	0.0479433	0	0	0.136704	0.241421	0.137505	0.12679	0.0153183	0.0338396	0.0797832	0.0356069	0.0270949	0.0268444	0.0300663	0.0668972	0.0370809	0.0511542	0.0361192	0.0274953	0.0397512
Ipo9	0.201892	0.0846964	0.16659	0.17681	0.23487	0.159449	0.120971	0.128024	0.140502	0.131811	0.153811	0.112864	0.103593	0.163545	0.186357	0.163805	0.161451	0.13647	0.200499	0.208987	0.282833	0.197343	0.180523	0.270179	0.244305	0.268915	0.231764	0.199453	0.252198	0.293038	0	0.26338	0.160942	0.180245	0.269143	0.17602	0.233654	0.133928	0.136365	0.207828	0.165836	0.182955	0.148217	0.177542	0.200819	0.238468	0.214098	0.252768	0.167941
Nav1	0.198977	0.368883	0.395052	0.525768	0.585527	0.240325	0.310391	0.331469	0.339413	0.267357	0.335456	0.31871	0.18601	0.402136	0.360147	0.253312	0.293552	0.365113	0.367088	0.340832	0.320995	0.41521	0.496448	0.39517	0.508157	0.322879	0.576147	0.540519	0.540037	0.682637	0	0	0.117405	0.17841	0.214169	0.228787	0.302519	0.273477	0.449367	0.450673	0.230157	0.255468	0.284846	0.268994	0.295099	0.271523	0.291622	0.438779	0.430165
Gm4793	0	0	0	0	0	0	0.0010902	0	0	0	0	0	0	0.00157046	0	0	0	0	0.0116804	0	0	0.00170545	0	0	0.00102704	0	0	0	0	0.000804476	0	0	0	0	0	0	0	0.00203786	0	0.00118482	0	0	0	0	0	0	0	0	0
Gm38399	0.0558777	0.0485609	0.04046	0.0516341	0.0294649	0.0136806	0.0195901	0.0494009	0.0613046	0.0328136	0.0256181	0.0509884	0.0194688	0.038311	0.0243708	0.0125796	0.0136401	0.0597862	0.0107294	0.0166632	0.0145481	0.0461347	0.0370766	0.0263148	0.0310499	0.0282488	0.0308018	0.0480466	0.0356024	0.0348358	0	0	0.0156863	0.038883	0.0137123	0.0192141	0.00508373	0.0291908	0.019068	0.0158232	0.002261	0.0114455	0.00717151	0.0278182	0.00254609	0.0214565	0.0236037	0.0405413	0.039787
Csrp1	0.21153	0.258025	0.623757	0.468653	0.432072	0.0822209	0.136078	0.256562	0.187096	0.156026	0.123137	0.16002	0.183568	0.110963	0.118759	0.130598	0.180265	0.340462	0.213614	0.170428	0.146678	0.219652	0.282392	0.169803	0.197498	0.135216	0.137071	0.288817	0.19741	0.169586	0	0.36571	0.382716	0.320905	0.230694	0.0759439	0.166962	0.190566	0.11613	0.107974	0.0777271	0.147111	0.1719	0.0963303	0.111966	0.120399	0.184735	0.289291	0.154201
Phlda3	0.207649	0.128936	0.51862	0.412932	0.552912	0.0869548	0.0882394	0.280751	0.154866	0.138426	0.0221172	0.122532	0.13881	0.162351	0.168186	0.12579	0.116645	0.321681	0.170632	0.216364	0.109951	0.110209	0.199698	0.147228	0.114867	0.152735	0.164613	0.186254	0.162324	0.229593	0	0.204413	0.259721	0.26128	0.207307	0.00995594	0.101975	0.169454	0.1075	0.228673	0.241293	0.260457	0.364924	0.256336	0.220576	0.206697	0.187381	0.355775	0.172394
Tnni1	0.0388967	0.0084993	0.05063	0.0301136	0.0169479	0.0239751	0.0127225	0.0526722	0.00986786	0.0164892	0.00972934	0.0117305	0.0169874	0.0116081	0.00958612	0.0441611	0.04464	0.0672824	0.0342493	0.0272876	0.0304926	0.0304972	0.0502829	0.0344999	0.0345168	0.0391721	0.00828886	0.0236323	0.0228563	0.00554394	0	0	0.0138853	0.0199127	0.00960212	0	0.0211241	0.0409843	0.0133602	0.00341635	0.092403	0.0727909	0.123391	0.0449923	0.0621922	0.0860545	0.0720342	0.108082	0.0559592
Lad1	0	0	0.00088125	0	0	0	0	0	0	0	0	0	0	0	0	0	0	0	0	0	0	0	0	0	0	0	0	0.00103229	0	0	0	0	0	0	0	0	0	0	0	0	0	0	0	0	0	0	0	0	0
Tnnt2	0.0117691	0.00858835	0.00285622	0.000740427	0.000859309	0.0169878	0.00691872	0.00770262	0.00350723	0.0109729	0.00467585	0.0161806	0.00641184	0	0.00216324	0.0410817	0.0102117	0.0127847	0	0.0298214	0.0175902	0.0166265	0.00780559	0	0.00145578	0.00942084	0.00614982	0	0.00281573	0.0015427	0	0	0.00878656	0	0.00398056	0	0.0116067	0.00163765	0	0.00178007	0.0490692	0.0170372	0.00773157	0	0.0174496	0.0240364	0.010243	0.0133023	0.00605439
Pkp1	0	0	0	0	0	0	0	0	0	0	0	0	0	0	0	0	0	0	0	0	0	0	0	0	0	0	0	0	0	0	0	0	0	0	0	0	0	0	0	0	0	0	0	0	0	0	0	0	0
Igfn1	0.0125469	0.0102793	0	0.00144025	0.0010206	0.000976359	0.00346368	0.00223364	0	0	0	0	0.00198023	0	0	0	0.00546947	0	0	0	0	0	0	0.00192901	0.00155241	0	0	0	0.00251393	0	0	0	0	0	0	0	0	0	0.00224755	0.00149348	0	0	0	0	0	0	0	0	0
Tmem9	1.37621	0.883304	0.655081	0.631881	0.793141	0.73698	0.647169	0.548867	0.546484	0.53244	0.719239	0.548509	0.552887	0.473789	0.60201	0.791785	0.920316	0.850189	0.751036	0.8759	0.602268	0.418367	0.452305	0.420032	0.452457	0.49208	0.393207	0.378887	0.312709	0.421349	0	1.11821	0.731092	0.691241	0.857535	0.523649	0.349762	0.462388	0.386755	0.512023	0.669121	0.612927	0.680075	0.547673	0.6248	0.566226	0.519564	0.634911	0.606655
Ascl5	0	0	0	0	0	0	0	0	0	0	0	0	0	0	0	0	0	0	0	0	0	0	0	0	0	0	0	0	0	0	0	0	0	0	0	0	0	0	0	0	0	0	0	0	0	0	0	0	0
Cacna1s	0	0.0420776	0.00200438	0	0	0	0	0	0	0.00220096	0	0	0.00213725	0	0	0	0	0	0	0.00341434	0.00238931	0	0.00144388	0	0.00137262	0.00168695	0	0	0	0.00137124	0	0	0	0	0.0013562	0	0	0.00121284	0	0	0	0.00277339	0	0	0	0	0.00233594	0	0
Gm37759	0	0	0	0	0	0	0	0	0	0	0	0	0	0	0	0	0	0	0	0	0	0	0	0	0	0	0	0	0	0	0	0	0	0	0	0	0	0	0	0	0	0	0	0	0	0	0	0	0
Kif21b	0	0	0.00876307	0.00854213	0.00537615	0.0017451	0.00294718	0	0	0.00448307	0	0	0	0.00311604	0.00566142	0.00871691	0.00222013	0.0129978	0	0.00250804	0.00628847	0.00158034	0.00566719	0.00230024	0.006177	0.00270715	0.00880217	0.00512068	0.00410752	0.00685715	0	0	0.00545911	0.0116163	0	0	0.00599546	0.00329832	0	0.00987264	0	0.002501	0.0151104	0.0108756	0.00647577	0.00180413	0.00433302	0.00448788	0
Mroh3	0	0	0	0	0	0	0	0	0	0	0	0	0	0	0	0	0	0	0	0	0	0	0	0	0	0	0	0	0	0	0	0	0	0	0	0	0	0	0	0	0	0	0	0	0	0	0	0	0
5730559C18Rik	0	0	0.00292613	0.0011045	0	0	0	0	0	0	0.00361879	0	0	0	0	0	0	0	0	0	0	0	0	0	0	0	0	0.00122586	0	0	0	0	0	0.00361326	0	0.00743602	0	0	0	0	0	0	0	0	0	0	0	0	0
Gm26568	0	0	0	0	0	0	0	0	0	0	0	0	0	0	0	0	0	0	0	0	0	0	0	0	0	0	0	0	0	0	0	0	0	0	0	0	0	0	0	0	0	0	0	0	0	0	0	0	0
A430034D21Rik	0	0	0	0	0	0	0	0	0	0	0	0	0	0	0	0	0	0	0	0	0	0	0	0	0	0	0	0	0	0	0	0	0	0	0	0	0	0	0	0	0	0	0	0	0	0	0	0	0
Gm37552	0	0	0	0	0	0	0	0	0	0	0	0	0	0	0	0	0	0	0	0	0	0	0	0	0	0	0	0	0	0	0	0	0	0	0	0	0	0	0	0	0	0	0	0	0	0	0	0	0
Gm26781	0	0	0.001123	0.000719773	0	0.000953842	0	0	0	0.00199339	0	0.00905994	0	0	0.0032705	0	0	0	0	0	0	0	0	0	0.00101039	0	0	0	0	0.00125443	0	0	0	0	0	0	0	0.00193083	0	0	0	0.00373052	0	0.00489728	0	0.00152546	0	0	0
Gpr25	0	0	0	0	0	0	0	0	0	0	0	0	0	0	0	0	0	0	0	0	0	0	0	0	0	0	0	0	0	0	0	0	0	0	0	0	0	0	0	0	0	0	0	0	0	0	0	0	0
Camsap2	0.377557	0.198879	0.19481	0.232287	0.231304	0.192381	0.191916	0.191706	0.154875	0.180139	0.201431	0.142896	0.158336	0.155124	0.169182	0.232363	0.244013	0.194481	0.230275	0.251811	0.157236	0.152112	0.144263	0.135147	0.164268	0.156954	0.156236	0.132837	0.152878	0.133889	0	0.371316	0.198803	0.204232	0.281659	0.166785	0.234177	0.129301	0.132311	0.129257	0.181915	0.19878	0.169503	0.13522	0.255558	0.198055	0.210958	0.192788	0.139803
Ddx59	0.0690988	0.0317962	0.0300044	0.0321214	0.0547239	0.0496532	0.0362569	0.0129105	0.0404779	0.035645	0.0568099	0.0321229	0.026995	0.0419164	0.0286959	0.0430429	0.0513633	0.0411768	0.0331043	0.0473808	0.0577277	0.033076	0.032027	0.0414777	0.0384413	0.0962167	0.0164209	0.0383109	0.0442428	0.0377983	0	0	0.0291464	0.0290138	0.0245823	0.0689344	0.0190777	0.0285252	0.0423795	0.0623786	0.049167	0.036547	0.0206594	0.0311069	0.0503603	0.042165	0.0408513	0.0207891	0.0484437
Kif14	0.0111887	0	0	0.00184676	0.000637792	0	0.000785061	0.00144732	0	0	0	0	0.00255629	0	0.00110705	0	0	0	0	0	0.0142429	0.0127127	0.0155939	0.00417562	0.0145657	0.375158	0.336305	0.344538	0.324266	0.350254	0	0	0.00343989	0.00477227	0	0.0108638	0.00652543	0.00417647	0.00535473	0.00403595	0	0.00456754	0.0146397	0	0	0.00189325	0.00502609	0	0
Gm37799	0	0	0	0	0	0	0	0	0	0	0	0	0	0	0	0	0	0	0	0	0	0	0	0	0	0	0	0	0	0	0	0	0	0	0	0	0	0	0	0	0	0	0	0	0	0	0	0	0
Gm33994	0	0	0	0	0	0	0	0	0	0	0	0	0	0	0	0	0	0	0	0	0	0	0	0	0	0	0	0	0	0	0	0	0	0	0	0	0	0	0	0	0	0	0	0	0	0	0	0	0
4933409D19Rik	0	0	0	0	0	0	0	0	0	0	0	0	0	0	0	0	0	0	0	0	0	0	0	0	0	0	0	0	0	0	0	0	0	0	0	0	0	0	0	0	0	0	0	0	0	0	0	0	0
Platr23	0	0	0.00283862	0	0	0	0.00257646	0.0020355	0	0	0	0	0	0	0	0	0	0.00354988	0	0	0	0.00477749	0.00128478	0	0	0.00387633	0	0	0.00298656	0	0	0	0.00260917	0.00362963	0	0	0	0.00102541	0	0	0	0	0.0113312	0	0	0	0	0	0
Zfp281	0.324052	0.449676	0.276847	0.342474	0.368011	0.282069	0.298583	0.362674	0.41973	0.322263	0.279793	0.224204	0.231952	0.294548	0.314035	0.339527	0.40338	0.526148	0.477157	0.278204	0.217272	0.164311	0.133161	0.204858	0.217868	0.300477	0.19661	0.191693	0.220693	0.266754	0.821895	0.259991	0.359221	0.47499	0.466245	0.194297	0.225527	0.179352	0.17209	0.233962	0.323319	0.35889	0.256027	0.403788	0.30885	0.243379	0.240376	0.248063	0.284665
Gm19705	0	0.00401446	0.00192601	0.00580069	0.00309256	0.00190009	0.00195861	0.00176958	0	0	0	0	0.00219846	0.00490339	0.00405616	0	0.00230847	0	0	0	0	0	0.00519237	0	0.00283649	0	0	0	0	0.00142661	0	0	0	0	0	0.00789171	0	0.00411533	0	0.00315888	0.00187066	0	0	0	0.00187933	0	0.00205436	0	0
Platr22	0	0	0	0	0	0	0	0	0	0	0	0	0	0	0	0.00260994	0	0.00352656	0	0.00454559	0	0	0.00187542	0.00230024	0.000963445	0	0	0.000883939	0	0	0	0	0.00120712	0	0	0	0	0.00238518	0	0	0	0.00639233	0	0	0	0	0	0	0
Nr5a2	2.16531	3.16312	2.53984	2.50616	3.17611	4.14733	5.58634	4.39362	4.37262	6.11717	6.16466	7.47	5.52117	4.78312	6.38549	2.65905	3.60049	2.49795	2.60017	3.24218	3.6441	4.80568	4.28075	4.06891	5.34953	3.12929	4.07081	4.70753	4.00636	5.39871	19.7255	4.04127	3.09525	2.87047	4.81197	6.058	5.65693	4.59723	4.19603	5.61548	2.81485	3.76848	2.95973	2.92941	3.64095	2.99878	4.24376	3.22161	3.31975
Gm26979	0	0	0.000764424	0	0	0	0	0	0	0	0	0	0	0	0	0	0	0	0	0	0	0	0	0	0	0	0	0	0.00147201	0	0	0	0	0	0	0	0	0	0	0	0	0	0	0	0	0	0	0	0
Gm26936	0	0	0.00123614	0	0	0	0	0	0	0	0	0	0	0	0.00103281	0	0.00202214	0	0	0	0	0	0	0	0	0	0	0	0	0	0	0	0	0	0	0	0	0	0	0	0	0	0	0	0	0	0	0	0
A430106G13Rik	0	0.00692174	0.0242564	0.0114992	0.028526	0.00484183	0.00194684	0.00458075	0.00504351	0.013211	0.00895419	0.00250759	0.0243898	0.0227864	0.0151879	0.00284503	0.00558224	0	0.0101465	0.0237245	0	0.00665475	0.019285	0.0166204	0.0149661	0	0.00799106	0.0123386	0.00860212	0.0150989	0	0.0961686	0.0214145	0.0500186	0.0394985	0	0.0213809	0.00739691	0.0103276	0.0116071	0.00326486	0.00627149	0	0.00555506	0.0109984	0.00440692	0.00777411	0.00501935	0
Ptprc	0	0	0	0.00736146	0	0	0	0.00332715	0	0	0	0	0.00114419	0	0	0	0	0	0	0	0	0	0.00101398	0	0.00367052	0	0	0	0	0.00840696	0	0	0.0014115	0	0	0	0	0.00149483	0	0	0	0	0	0	0	0	0	0	0
Gm28556	0	0	0	0	0	0	0	0	0	0	0	0	0	0	0	0	0	0	0	0	0	0	0	0	0	0	0	0	0	0	0	0	0	0	0	0	0	0	0	0	0	0	0	0	0	0	0	0	0
Atp6v1g3	0	0	0.00140647	0	0	0	0.00114805	0.00301796	0	0.00284077	0.00345678	0	0.00133251	0	0.00113644	0	0	0	0	0	0	0	0	0	0	0	0	0.000918368	0.00123871	0	0	0	0	0.00254832	0	0	0	0.00337625	0	0	0	0	0	0	0	0	0	0	0
Nek7	0.421948	0.592545	0.431037	0.517643	0.680701	0.544224	0.515861	0.534201	0.633405	0.570153	0.64912	0.582053	0.475556	0.628363	0.693247	0.40478	0.398255	0.404306	0.424375	0.42063	0.598615	0.58069	0.465214	0.582897	0.593224	0.644189	0.642685	0.6187	0.663622	0.73344	0.821895	1.01999	0.561245	0.742851	0.743256	0.611739	0.542613	0.52647	0.549778	0.637586	0.543312	0.434678	0.442848	0.559565	0.523083	0.556381	0.538267	0.51149	0.467587
Gm28501	0	0	0	0	0	0	0	0	0.00324598	0	0	0	0	0	0	0	0	0	0	0	0	0	0	0	0	0	0	0.00063602	0	0	0	0	0	0.00390055	0	0	0	0	0	0	0	0	0	0	0	0	0	0	0
Gm5833	0	0	0	0	0	0	0	0	0	0	0	0	0	0	0	0	0	0	0	0	0	0	0	0	0	0	0	0	0	0	0	0	0	0	0	0	0	0	0	0	0	0	0	0	0	0	0	0	0
Lhx9	0.0466352	0.0125351	0.00900836	0.0199262	0.0274313	0.0180197	0.00209799	0.00744751	0.00522258	0.00215725	0.0404341	0.00332698	0.00213809	0.0140708	0.00215888	0.0187292	0.00600697	0.00792538	0.0293415	0	0.0202456	0.00579652	0.00150755	0.00367584	0.00342089	0.0143151	0.00654342	0.00596109	0.0221912	0.0081336	0.821895	0	0.00795964	0.0125729	0.010839	0.0102051	0.0275393	0.0135601	0.0242039	0.0126762	0.0265643	0.00794583	0	0.0222785	0.00296774	0.0208122	0.0047069	0	0
2310009B15Rik	0.417722	0.355867	0.405664	0.529268	0.418392	0.420248	0.430921	0.359428	0.463706	0.40997	0.523271	0.45067	0.420588	0.442787	0.453065	0.494479	0.437803	0.457821	0.429679	0.371691	0.445078	0.442494	0.384494	0.518671	0.447959	0.624081	0.486999	0.427127	0.513724	0.444735	0	0.268541	0.415028	0.39624	0.430836	0.410183	0.438032	0.54622	0.629347	0.57599	0.424474	0.426901	0.383378	0.338176	0.435886	0.392826	0.440437	0.46798	0.441036
1700019P21Rik	0	0	0	0	0	0	0	0	0	0	0	0	0	0	0	0	0	0	0	0	0	0	0	0	0	0	0	0	0	0	0	0	0	0	0	0	0	0	0	0	0	0	0	0	0	0	0	0	0
Dennd1b	0.469461	0.472251	0.320096	0.558836	0.476602	0.350928	0.377545	0.371546	0.464718	0.401452	0.397465	0.388758	0.264075	0.366055	0.326902	0.365239	0.421209	0.394057	0.471462	0.403855	0.290268	0.290816	0.332714	0.34193	0.306903	0.283616	0.289781	0.320133	0.364449	0.267565	0	0.152522	0.363229	0.45228	0.464693	0.395037	0.228265	0.230062	0.256502	0.254115	0.307713	0.296884	0.29685	0.292905	0.275894	0.360131	0.362699	0.345178	0.359039
Crb1	0.0314116	0.00780566	0.0528465	0.0638749	0.0828659	0.010773	0.0236965	0.0247163	0.0326393	0.0199119	0.0304708	0.0232022	0.0763653	0.0908531	0.130213	0.00538031	0.00930502	0.0075032	0.00692154	0.0138238	0.0131615	0.0152524	0.0321275	0.0479706	0.037629	0.0154159	0.0210527	0.0715772	0.0637405	0.0652367	0	0.213425	0.0437408	0.0549776	0.0374646	0.0215359	0.0180815	0.0827366	0.0713736	0.0728898	0.00884479	0.0190505	0.00769856	0.00561839	0.0139647	0.0016512	0.00458879	0.0334724	0.0121671
4933436E23Rik	0	0	0	0	0	0	0	0	0	0	0	0	0	0	0	0	0	0	0	0	0	0	0	0	0	0	0	0	0	0	0	0	0	0	0	0	0	0	0	0	0	0	0	0	0	0	0	0	0
Gm34816	0	0	0	0	0	0	0	0	0	0	0	0	0	0	0	0	0	0	0	0	0	0	0	0	0	0	0	0	0	0	0	0	0	0	0	0	0	0	0	0	0	0	0	0	0	0	0	0	0
Zbtb41	0.10337	0.171109	0.168453	0.238939	0.200331	0.150417	0.200149	0.143569	0.147905	0.198724	0.243521	0.175801	0.13271	0.232904	0.183702	0.156991	0.186348	0.126068	0.177088	0.197437	0.160847	0.192734	0.166039	0.188965	0.231034	0.163945	0.171162	0.229239	0.232475	0.207241	0.821895	0.0509954	0.209715	0.259517	0.251155	0.0764613	0.131345	0.143739	0.215525	0.209391	0.173109	0.168745	0.150634	0.174941	0.154344	0.172828	0.171908	0.207318	0.240121
Aspm	0.0244379	0.00536927	0.0214969	0.0142774	0.0102148	0.0126676	0.0104792	0.0147449	0	0.00169645	0.0161918	0.00550565	0.0191535	0.0256546	0.020806	0.00692223	0.00652465	0.0155451	0	0.00674153	0.0713804	0.0594921	0.0911811	0.0881699	0.0604056	2.19933	1.47992	1.52768	1.79434	1.51809	0	0	0.0128905	0.010564	0.0110199	0.021347	0.00582645	0.0339873	0.0128527	0.0311751	0.0120304	0.0137626	0.00723334	0.0241007	0.0125728	0.0161899	0.0214301	0.0166867	0.00891735
F13b	0	0	0	0	0	0	0	0	0	0	0	0	0.00109182	0	0	0	0	0	0	0	0	0	0.00111637	0.000916845	0	0	0.00305608	0.00245444	0	0	0	0	0	0	0	0	0	0.00157371	0	0	0	0	0	0	0	0	0	0	0
Cfhr1	0	0	0	0	0.000826474	0	0	0	0	0	0	0	0	0	0	0	0	0	0	0	0	0	0	0	0	0	0	0	0	0	0	0	0	0	0	0	0	0	0	0	0	0	0	0	0	0	0	0	0
Gm4788	0	0	0.0053588	0.00333184	0.00649766	0.000820616	0.00154603	0.00160459	0	0	0	0.00238119	0.00583909	0.00504093	0.0064981	0	0	0	0	0	0	0	0.00174945	0.00178553	0.00140632	0	0	0.00093868	0.00361298	0.00279527	0	0	0.00541837	0.0106064	0.00611337	0	0	0	0.00680157	0.00730465	0	0	0	0	0.003443	0	0	0	0
Cfhr2	0	0	0.00646029	0.00828172	0.00972458	0.000820616	0.00125674	0	0.00383347	0.00226973	0	0	0	0.00396039	0.00387741	0.0053985	0	0	0	0	0.00268776	0	0	0	0.00236054	0	0	0	0	0.00263778	0	0	0	0.0102946	0.0133823	0.00823543	0	0.00130663	0	0.00152813	0.00100771	0	0	0	0	0	0	0	0
Cfh	2.93219	2.85253	8.33542	11.2177	11.8131	1.16586	0.663606	1.34117	1.82793	1.6333	2.19883	1.42855	4.29758	7.32973	7.442	1.09005	0.913815	1.04418	1.53272	1.23396	0.959171	0.554954	0.904808	1.52329	1.16584	0.770129	0.516851	1.94444	2.36596	1.99545	4.93137	8.33172	9.15708	15.1543	14.437	1.01608	0.679317	1.34796	2.37432	1.98064	0.939147	0.606349	0.810861	0.958053	0.941801	0.863759	0.642689	0.612436	0.909794
Kcnt2	0.0566722	0.0190698	0.0967872	0.128883	0.14961	0.0638237	0.0157122	0.0554104	0.0510718	0.0305194	0.0962513	0.0958002	0.136107	0.276613	0.263363	0.0525753	0.0277848	0.0148143	0.022303	0.0311059	0.0837744	0.0664125	0.04692	0.14316	0.113711	0.0577667	0.09704	0.0860027	0.180877	0.130961	0	0.0522488	0.165838	0.170973	0.226781	0.137939	0.0970981	0.0674419	0.174583	0.181866	0.0831076	0.0122758	0.0368653	0.0117563	0.0395826	0.063631	0.022663	0.038693	0.0560627
4930590L20Rik	0	0	0	0.000589055	0	0	0	0	0	0	0	0	0	0	0	0	0	0	0	0	0.00179751	0	0	0	0	0	0	0	0	0	0	0	0	0	0	0	0	0	0	0	0	0	0	0	0	0	0	0	0
Cdc73	0.737914	0.60858	0.637649	0.753752	0.810814	0.6433	0.533889	0.556708	0.492345	0.579112	0.776107	0.563447	0.562271	0.895928	0.811757	0.547324	0.566576	0.549663	0.393776	0.575673	0.6446	0.561512	0.520456	0.607976	0.649794	0.731916	0.571386	0.626818	0.683126	0.696913	4.10948	0.868545	0.770472	1.03013	1.12137	0.711195	0.547178	0.449541	0.561093	0.68978	0.618928	0.612091	0.43145	0.561548	0.56088	0.645333	0.456728	0.507178	0.596791
B3galt2	0.0349149	0.0543928	0.0461845	0.0269142	0.083758	0.00743745	0.0285167	0.039828	0.0696397	0.0392255	0.0262932	0.052462	0.0784448	0.074333	0.154462	0.00899719	0.0105232	0.0188414	0.00512301	0.0192383	0.00701825	0.0347203	0.0503411	0.0704437	0.0383132	0.0141533	0.0329895	0.0591359	0.0823873	0.0657192	0.821895	0	0.0537248	0.0351649	0.0805865	0.0266382	0.0722351	0.0667232	0.0999017	0.102389	0.00977683	0.0164943	0.00959639	0.00655317	0.0183841	0.0103736	0.0154067	0.0143595	0.0264307
Glrx2	0.454868	0.844579	0.81236	0.82815	0.928863	0.590615	0.67709	0.665696	0.692896	0.67003	0.655107	0.666196	0.816683	0.874894	1.00866	0.572852	0.634181	0.516571	0.623571	0.702246	0.682283	0.711607	0.727057	0.826472	0.760246	0.500094	0.605904	0.688507	0.637515	0.71761	2.46569	0.532171	0.973777	0.981384	0.935885	0.733778	0.883717	0.762382	0.89107	0.852776	0.613285	0.488715	0.482728	0.654357	0.686211	0.567787	0.561877	0.626304	0.66594
Trove2	0.271754	0.330414	0.338814	0.445036	0.432467	0.237189	0.182127	0.191827	0.226675	0.272179	0.286601	0.16576	0.244388	0.352392	0.333596	0.248502	0.180378	0.23693	0.222705	0.2292	0.175592	0.162116	0.151506	0.215098	0.241054	0.273401	0.169006	0.203892	0.261133	0.303878	0.821895	0.491278	0.408714	0.453013	0.582864	0.250233	0.17899	0.1946	0.241135	0.299768	0.218359	0.170442	0.192764	0.254309	0.284579	0.231566	0.124951	0.178399	0.206831
Uchl5	0.267021	0.390163	0.327164	0.316089	0.388836	0.274861	0.301006	0.264109	0.248225	0.243516	0.263162	0.325496	0.262204	0.315126	0.249006	0.234943	0.304566	0.286331	0.222238	0.251737	0.558726	0.523804	0.476361	0.528043	0.472301	0.690238	0.621288	0.556223	0.657867	0.584738	0	0.423539	0.276548	0.292434	0.320908	0.339582	0.348906	0.305828	0.304493	0.328816	0.283288	0.27492	0.20106	0.293118	0.309565	0.405423	0.393244	0.530293	0.391932
Rgs2	4.76887	4.70377	6.34017	5.5802	6.62848	5.43251	6.60903	7.48411	5.44789	10.042	7.06961	7.64947	7.50568	7.24385	8.73726	3.77077	4.52913	4.32778	2.88046	7.33891	5.53763	8.95472	10.4809	7.72098	8.4761	4.82172	7.09895	8.43656	6.48026	6.7817	15.616	5.55344	4.74464	5.02443	5.98318	7.79674	9.01861	10.4278	7.5618	8.22577	4.45176	6.30236	5.93109	3.88893	6.99824	4.61491	7.23975	8.15021	6.45459
Rgs13	0	0.0433691	0.119687	0.1438	0.216576	0.0135292	0.00994335	0.0229736	0.029628	0.0238538	0.0706406	0.0533544	0.25207	0.54563	0.637287	0.00900446	0	0.0143519	0.00643607	0.0113483	0.0389916	0.0674973	0.0792438	0.130353	0.100636	0.00935261	0.10864	0.137418	0.227459	0.248528	0.821895	0.514966	0.291111	0.55727	0.632243	0.0361944	0.145686	0.239469	0.334824	0.427073	0.00166748	0	0	0	0	0.0147399	0.0051521	0.00858976	0.0129139
Rgs1	0	0	0	0.0169789	0.00518617	0	0	0	0	0.00401543	0	0	0	0	0	0	0	0	0	0	0	0	0	0.00180306	0.00293642	0	0	0.00331465	0	0	0	0	0	0.00347228	0	0	0	0	0.019305	0	0	0	0	0	0	0	0	0	0
Rgs21	0	0	0	0	0	0	0	0	0	0	0	0	0	0	0	0	0	0	0	0	0	0	0	0	0	0	0	0	0	0	0	0	0	0	0	0	0	0	0	0	0	0	0	0	0	0	0	0	0
Rgs18	0	0	0	0	0	0	0	0	0	0	0	0	0	0	0	0	0	0	0	0	0	0	0	0	0	0	0	0	0	0	0	0	0	0	0	0	0	0	0	0	0	0	0	0	0	0	0	0	0
Gm29514	0	0	0	0	0	0	0	0	0	0	0	0	0	0	0	0	0	0	0	0	0	0	0	0	0	0	0	0	0	0	0	0	0	0	0	0	0	0	0	0	0	0	0	0	0	0	0	0	0
Brinp3	0	0	0	0	0	0	0	0	0	0	0	0	0.00133433	0	0	0	0	0	0	0	0	0	0	0	0	0	0	0	0	0	0	0	0	0	0	0	0	0	0	0	0	0	0	0	0	0	0	0	0
Gm15584	0	0	0	0	0	0	0.00125386	0	0	0	0	0	0	0	0	0	0	0	0	0	0	0	0	0	0	0	0	0	0	0	0	0	0	0	0	0	0	0	0	0	0	0	0	0	0	0	0	0	0
Gm29515	0	0	0	0	0	0	0	0	0	0	0	0	0	0	0	0	0	0	0	0	0	0	0	0	0	0	0	0	0	0	0	0	0	0	0	0	0	0	0	0	0	0	0	0	0	0	0	0	0
Gm29020	0	0	0	0	0	0	0	0	0	0	0	0	0	0	0	0	0	0	0	0	0	0	0	0	0	0	0	0	0	0	0	0	0	0	0	0	0	0	0	0	0	0	0	0	0	0	0	0	0
Gm29398	0	0	0	0	0	0	0	0	0	0	0	0	0	0	0	0	0	0	0	0	0	0	0	0	0	0	0	0	0	0	0	0	0	0	0	0	0	0	0	0	0	0	0	0	0	0	0	0	0
Pla2g4a	0.14866	0.209397	0.222227	0.255025	0.175614	0.349712	0.202569	0.239097	0.221409	0.288833	0.265908	0.108176	0.17748	0.190102	0.168614	0.334139	0.232353	0.244766	0.183934	0.220608	0.506493	0.420668	0.447223	0.450269	0.430341	0.524823	0.520825	0.390217	0.477854	0.356082	0.821895	0.240282	0.17365	0.144828	0.205076	0.301862	0.395446	0.332604	0.372409	0.319072	0.45708	0.299591	0.251256	0.321579	0.238648	0.500936	0.267024	0.334214	0.481359
Ptgs2	0	0	0.0131522	0.0230294	0.0197579	0.00576336	0	0	0	0.00695123	0.0271469	0	0	0	0	0.00890315	0	0.00464389	0.010122	0.00769275	0.00750438	0.00149848	0	0.00519931	0.00161847	0	0.0128725	0.00150004	0.00309328	0.00545562	0	0	0.00120046	0.002072	0	0.0351824	0	0.00128865	0.00773643	0	0.00190738	0.00984559	0	0.00704063	0.00721475	0.0016512	0	0	0.00995625
Ptgs2os2	0	0	0	0	0	0	0	0	0	0	0	0	0	0	0	0	0	0	0	0	0	0	0	0	0	0	0	0	0	0	0	0	0	0	0	0	0	0	0	0	0	0	0	0	0	0	0	0	0
Pdc	0	0	0	0	0	0	0	0	0	0	0	0	0	0	0	0	0	0	0	0	0	0	0	0	0	0	0	0	0	0	0	0	0	0	0	0	0	0	0	0	0	0	0	0	0	0	0	0	0
2310030A07Rik	0	0	0	0	0.00132689	0	0	0	0	0	0	0	0	0	0	0	0	0	0	0	0	0	0	0	0	0	0	0	0	0	0	0	0	0	0	0	0	0	0	0	0	0	0	0	0	0	0	0	0
BC003331	0.384351	0.393909	0.433872	0.442605	0.412759	0.34473	0.429897	0.474195	0.316091	0.438954	0.364889	0.357745	0.491258	0.44409	0.463612	0.297997	0.43199	0.416044	0.289237	0.468195	0.305675	0.357132	0.3884	0.426664	0.383281	0.380872	0.376431	0.44757	0.456937	0.459657	1.64379	0.346186	0.47413	0.408023	0.516035	0.348793	0.370124	0.485057	0.445974	0.495243	0.39082	0.414652	0.446865	0.350103	0.487505	0.330199	0.405339	0.343662	0.34454
Tpr	3.1766	2.75759	2.48821	2.96166	3.20247	3.26092	3.48277	3.02743	3.24984	3.66797	3.1094	2.85841	2.52176	2.65364	3.30438	3.48293	3.27989	3.11361	3.04454	3.57636	3.70098	3.15165	2.89107	3.46537	3.92256	4.36354	3.85347	3.57587	4.14714	4.37314	0.821895	4.11616	2.81699	3.05044	3.29649	2.93255	2.93069	2.89491	2.85911	3.50386	3.44211	3.52585	3.11268	3.57741	3.57063	3.51743	3.57988	3.37172	3.56625
Prg4	0.0128445	0.0145671	0.656584	0.261683	0.200701	0.0109492	0.0040197	0.0136085	0	0.00180753	0.0044179	0.0142039	0.153027	0.0786753	0.0730389	0.00665806	0	0.00401368	0.00537526	0	0.00673607	0.00350053	0.0545196	0.0197047	0.0150642	0.00475973	0.00913882	0.109324	0.0301988	0.357127	0	0.201533	0.630198	0.382417	0.225635	0	0	0.034924	0.0445868	0.016392	0	0.00755014	0.0104136	0.0247111	0	0.0114483	0.00225054	0.0101285	0.00430094
Hmcn1	0.0622423	0	0.0290523	0.0240278	0.019454	0.0080001	0.0139589	0.0105801	0.0153651	0.00125722	0.00665081	0.0296385	0.0128815	0.0108103	0.0096492	0.00636231	0.00610455	0.00428713	0.01179	0.00517262	0.00845158	0.0234259	0.00825516	0.00107741	0.0042975	0.0230684	0.0353622	0.0178671	0.00638076	0.0155304	0	0	0.0521213	0.0183326	0.0136982	0	0.0184762	0.0120056	0.00540889	0.00943187	0.0159672	0.0195275	0.0108274	0	0	0.0112267	0	0	0
Gm20631	0	0	0	0	0	0	0	0	0	0	0	0	0	0	0	0	0	0	0	0	0	0	0	0	0	0	0	0	0	0	0	0	0	0	0	0	0	0	0	0	0	0	0	0	0	0	0	0	0
Gm29188	0	0	0	0	0	0	0	0	0	0	0	0	0	0	0	0	0	0	0	0	0	0	0	0	0	0	0	0	0	0	0	0	0	0	0	0	0	0	0	0	0	0	0	0	0	0	0	0	0
C730036E19Rik	0	0	0	0	0	0	0	0	0	0	0	0	0	0.00131499	0	0	0	0	0	0	0	0	0	0	0	0	0	0	0	0	0	0	0	0	0	0	0	0	0	0	0	0	0	0	0	0	0	0	0
Gm47985	0	0	0	0	0	0	0	0	0	0	0	0	0	0	0	0	0	0	0	0	0	0	0	0	0	0	0	0	0	0	0	0	0	0	0	0	0	0	0	0.00128607	0	0	0	0	0	0	0	0	0
Gm8947	0	0	0	0	0	0	0	0	0	0	0	0	0	0	0	0	0	0	0	0	0	0	0	0	0	0	0	0	0	0	0	0	0	0	0	0	0	0	0	0	0	0	0	0	0	0	0	0	0
Gm47995	0	0	0	0	0	0	0	0	0	0	0	0	0	0	0	0	0	0	0	0	0	0	0	0	0	0	0	0	0	0	0	0	0	0	0	0	0	0	0	0	0	0	0	0	0	0	0	0	0
3110040M04Rik	0	0	0	0	0	0	0	0	0	0	0	0	0	0	0	0	0	0	0	0	0	0	0	0	0	0	0	0	0	0	0	0	0	0	0	0	0	0	0	0	0	0	0	0	0	0	0	0	0
Gm47996	0	0	0	0	0	0	0	0	0	0	0	0	0	0	0	0	0	0	0	0	0	0	0	0	0	0	0	0	0	0	0	0	0	0	0	0	0	0	0	0	0	0	0	0	0	0	0	0	0
Gm10138	0.147979	0.119255	0.41462	0.258344	0.330166	0.194048	0.280384	0.315886	0.340951	0.312049	0.226747	0.279769	0.757225	0.667639	0.684828	0.168182	0.285655	0.190478	0.163814	0.198057	0.164459	0.342429	0.587016	0.543585	0.429929	0.198817	0.473326	0.806253	0.585714	0.560286	0	0.805792	0.554016	0.527628	0.444932	0.1627	0.413318	0.80774	0.751801	0.562891	0.182819	0.225943	0.269768	0.100754	0.363345	0.190404	0.263007	0.204999	0.287226
Ivns1abp	1.88422	2.79416	5.24603	3.97045	4.50039	2.23293	3.55816	4.44963	3.77704	4.135	2.32668	4.6558	7.92092	6.97	7.93898	1.94626	2.48586	2.67845	2.28439	2.68747	2.44961	3.17226	4.15925	3.88493	3.74275	2.15743	2.83413	5.43136	4.08063	4.18045	3.28758	8.65837	9.48693	7.30456	8.50544	1.82269	3.52127	5.2189	4.60737	5.20063	2.80511	3.11072	3.2785	2.79909	3.0532	2.71473	3.12796	3.19348	3.15446
Swt1	1.0726	0.92148	0.587698	0.809905	0.990397	0.903426	0.685311	0.683623	0.891233	0.98555	0.982218	0.768012	0.635506	0.990696	1.02366	1.01133	0.677868	0.763018	1.15277	1.17834	0.719288	0.522103	0.494239	0.762278	0.711314	0.82243	0.790997	0.529086	0.803264	0.934112	2.46569	0.537577	0.749491	1.00845	1.16605	1.05738	0.658407	0.5128	0.762623	0.920279	0.937246	0.717585	0.658749	0.878718	1.13167	0.750886	0.689419	0.542681	1.01545
Trmt1l	0.411507	0.185406	0.193708	0.285194	0.357924	0.373529	0.193438	0.22704	0.215935	0.319245	0.352682	0.136449	0.162751	0.295959	0.353986	0.409039	0.215824	0.217278	0.309872	0.334857	0.294612	0.158966	0.200716	0.227613	0.275394	0.284714	0.235592	0.186971	0.235236	0.269755	0.821895	0.253148	0.235039	0.250837	0.328641	0.301416	0.181599	0.185629	0.240185	0.260154	0.368515	0.232657	0.198094	0.324289	0.313493	0.295784	0.212733	0.178334	0.290382
Rnf2	0.390083	0.300191	0.340178	0.452407	0.341137	0.396494	0.304113	0.325406	0.335829	0.291537	0.291739	0.271068	0.283712	0.369041	0.301489	0.400692	0.338604	0.334659	0.369707	0.358789	0.37536	0.275664	0.287171	0.297025	0.298823	0.393973	0.295355	0.307301	0.316603	0.367718	0.821895	0.325523	0.358872	0.451485	0.425046	0.295281	0.313057	0.254784	0.30079	0.247333	0.418331	0.303967	0.364117	0.349824	0.344199	0.334965	0.283959	0.301518	0.288484
Gm28181	0	0	0	0	0	0	0	0	0	0	0	0	0	0	0	0	0	0	0	0	0	0	0	0	0	0	0	0	0	0	0	0	0	0	0	0	0	0	0	0	0	0	0	0	0	0	0	0	0
Fam129a	0.0156772	0.0330947	0.0224262	0.0613322	0.0298419	0.00988016	0.0055009	0.008344	0.0250283	0	0.0126307	0.00281536	0.00582285	0.0111837	0.0058647	0.029269	0.0204869	0.0495427	0.0225321	0.0104257	0.00975519	0.00498424	0.00574113	0.00646556	0.00690578	0.00231684	0.0019754	0.00383433	0.00761218	0.0055548	0	0	0.0184428	0.00522697	0.0131678	0.0161695	0	0.0054351	0.00696534	0.00863325	0.0217937	0.0146785	0.0051489	0.0330414	0.0111425	0.00998261	0.0147937	0.00787796	0
2810414N06Rik	0	0	0.0159928	0.0152767	0.00927776	0.00765796	0.00579204	0.0126329	0.0163194	0.0154247	0.0124773	0.0102147	0.00543446	0.0104837	0.0189336	0.0063696	0.00687108	0	0.0157718	0.0221171	0.0145983	0.00615482	0.00547892	0.00876853	0.0173535	0.015521	0.017479	0.0149771	0.00780214	0.0116827	0	0	0.00990926	0.0149847	0.009612	0.00851784	0.0298953	0.0125098	0.0137573	0.0143829	0.00973431	0.0120434	0.0235898	0	0.00672256	0.006673	0.0105275	0.00401696	0.00605375
Edem3	0.15124	0.101945	0.157635	0.200157	0.241057	0.113349	0.135552	0.142097	0.0886117	0.146349	0.140018	0.136491	0.0878709	0.141303	0.168636	0.0964502	0.0946325	0.105121	0.138406	0.132322	0.097271	0.0831094	0.0985651	0.154814	0.163115	0.104234	0.0989951	0.0997307	0.0977741	0.142043	0.821895	0.0509954	0.149695	0.242547	0.326758	0.0489452	0.153084	0.0662215	0.0994375	0.151569	0.0891802	0.087638	0.0929874	0.123598	0.125536	0.0973042	0.0758816	0.0609722	0.132243
1700025G04Rik	0.351213	0.419939	0.139151	0.185098	0.139754	0.413481	0.4277	0.365706	0.389734	0.348693	0.270655	0.252352	0.126371	0.120673	0.146355	0.501515	0.630292	0.598339	0.560286	0.588528	0.420298	0.342213	0.21792	0.196428	0.260352	0.421739	0.308388	0.168407	0.214668	0.17001	0	0.703188	0.127647	0.11794	0.155318	0.233936	0.180877	0.131363	0.13356	0.116176	0.517261	0.609952	0.604306	0.509834	0.441662	0.471007	0.58575	0.431965	0.343189
Gm28610	0	0	0	0	0	0	0	0	0	0	0	0	0	0	0	0	0	0	0	0	0	0	0	0	0	0	0	0	0	0	0	0	0	0	0	0	0	0	0	0	0	0	0	0	0	0	0	0	0
Tsen15	0.397373	0.396012	0.30048	0.294232	0.395583	0.533311	0.493507	0.424953	0.3121	0.496313	0.518012	0.509421	0.350536	0.352738	0.395235	0.476316	0.470208	0.407246	0.333922	0.481049	0.810374	0.775151	0.621991	0.532905	0.623207	0.806786	0.706075	0.494151	0.441118	0.487116	0	0.568916	0.284048	0.290016	0.394492	0.595607	0.549055	0.465815	0.378077	0.52553	0.493775	0.502131	0.563606	0.385637	0.482004	0.622656	0.716621	0.634793	0.593697
Colgalt2	0.0291924	0.0598335	0.00992836	0.00968257	0.0251865	0.0473791	0.063683	0.0724878	0.0657524	0.0279538	0.0816208	0.100786	0.0340044	0.0193326	0.028631	0.0318698	0.0306293	0.0390059	0.0362507	0.0470132	0.0421589	0.0945074	0.0648035	0.0534065	0.0553202	0.0306306	0.158861	0.0543783	0.0407755	0.0389296	0	0	0.0223888	0.020013	0.0247424	0.0376148	0.214751	0.0687933	0.0634465	0.0983065	0.0237668	0.0401388	0.0342669	0.0391122	0.0333185	0.034146	0.0487037	0.0558759	0.00474793
Rgl1	0.364425	0.389546	0.218223	0.242642	0.147095	0.106014	0.257231	0.276315	0.187403	0.123641	0.0717456	0.190352	0.130282	0.0908578	0.0557225	0.215674	0.410483	0.368523	0.268676	0.180514	0.0719049	0.141616	0.134752	0.0754783	0.0672187	0.0976781	0.164671	0.149927	0.106906	0.0836995	0	0.063991	0.0743241	0.054376	0.0449608	0.0189826	0.0650328	0.133455	0.0730262	0.0887932	0.181906	0.370146	0.293968	0.15687	0.161194	0.122673	0.259403	0.230777	0.122195
Apobec4	0	0	0	0	0	0	0	0	0	0	0	0	0	0	0	0	0	0	0	0	0	0	0	0	0	0	0	0	0	0	0	0	0	0	0	0	0	0	0	0	0	0	0	0	0	0	0	0	0
Arpc5	0.830585	0.830616	1.44836	1.47827	1.54825	0.825705	0.811952	0.795063	0.69333	0.770441	0.941026	0.801457	0.912059	1.14501	1.18703	0.905099	0.858154	0.910986	0.855928	0.873709	0.756302	0.883534	0.917915	0.929594	0.899484	0.888358	0.958963	0.859487	1.00068	0.879313	0	1.23086	1.52394	1.72131	1.55569	0.7201	0.88798	1.05019	1.11277	0.93448	0.896963	0.790279	0.877667	0.669433	0.788542	0.815132	0.78814	0.819722	0.72059
Ncf2	0	0	0.00345776	0.00218131	0.00269289	0.00180907	0.00535538	0.0110543	0.0141979	0.00222327	0	0.00513763	0.00400373	0.0139335	0	0.00288135	0.00387744	0.0223772	0.00466765	0.00445107	0.00415699	0.00667623	0.0155925	0.0133677	0.0195783	0.0251059	0.0125824	0.0117496	0.00876846	0.0105662	0	0	0	0.00168733	0.00121788	0	0	0.00393091	0.00707778	0	0.0161509	0.0266879	0.0130642	0	0.00864467	0.00656165	0.0195065	0.0119738	0.0324958
Smg7	0.204341	0.29819	0.287138	0.32245	0.257667	0.266425	0.371656	0.307737	0.253385	0.257435	0.241065	0.35506	0.254577	0.258533	0.233538	0.259506	0.367552	0.378382	0.345672	0.236204	0.249959	0.384249	0.318951	0.275341	0.267865	0.309364	0.381883	0.316629	0.302706	0.251807	0	0.299649	0.265396	0.30607	0.250888	0.308306	0.318973	0.278055	0.240219	0.209805	0.264145	0.410301	0.386468	0.41787	0.199009	0.283279	0.37356	0.387824	0.313338
Nmnat2	0	0	0	0	0	0	0	0	0	0	0	0	0	0	0	0	0	0	0	0	0	0	0	0	0	0	0	0	0	0	0	0	0	0	0	0	0	0	0	0	0.00198045	0	0	0	0	0.00116546	0	0	0
Gm28960	0	0	0	0	0	0	0	0	0	0	0	0	0	0	0	0	0	0	0	0	0	0	0	0	0	0	0	0	0	0	0	0	0	0	0	0	0	0	0	0	0	0	0	0	0	0	0	0	0
Lamc2	0	0	0.00166659	0.00308793	0	0	0.00121778	0.00847573	0	0	0	0	0	0.00127323	0.00103281	0	0	0	0	0	0	0	0	0	0	0	0	0.0039666	0	0	0	0	0.00130256	0	0.00139382	0	0	0	0.0026698	0	0	0.00410963	0	0	0	0	0.00197839	0.00437587	0
Lamc1	0.350724	0.195111	0.151596	0.244339	0.202384	0.185861	0.130834	0.132656	0.162669	0.186231	0.137707	0.113202	0.0986532	0.197858	0.173265	0.203223	0.146868	0.137357	0.182524	0.17566	0.159132	0.123403	0.113597	0.142664	0.15456	0.105086	0.100889	0.0871891	0.138459	0.134345	0	0.0735381	0.136058	0.210227	0.226969	0.182636	0.0611082	0.0961281	0.195564	0.122332	0.162752	0.144673	0.174061	0.17767	0.12784	0.175346	0.0893931	0.142155	0.204253
Shcbp1l	0	0	0	0.000797013	0	0	0	0.00193223	0	0	0.00404674	0	0	0	0.00103281	0.00145993	0.00209761	0	0	0	0	0	0	0.00168793	0	0	0.00671131	0.000675078	0	0	0	0	0	0	0	0	0	0	0.0025505	0.00171073	0	0	0	0	0	0	0	0	0.00280218
Dhx9	1.62185	1.16364	1.04266	1.21643	1.14379	1.71436	1.60449	1.27986	1.40724	1.21319	1.58526	1.31556	0.993205	1.19728	1.1501	1.73272	1.61529	1.35006	1.58146	1.43933	2.0021	1.61944	1.31512	1.50101	1.44816	1.9518	1.50608	1.28532	1.40868	1.34051	1.64379	1.42012	1.10742	1.28264	1.22346	1.63603	1.53186	1.03109	1.20653	1.0706	1.80256	1.69836	1.76628	1.8038	1.35666	1.95242	1.89301	1.62307	1.71322
Npl	0.0511159	0	0.0117072	0.0243789	0.0120535	0.0606621	0.0165627	0.00204873	0.0258377	0.0309124	0.0493385	0.00531518	0.000888693	0.00909845	0.00849285	0.0554616	0.0124175	0.0337947	0.070098	0.0609952	0.06651	0.00958093	0.0153809	0.0211299	0.041556	0.0666061	0.0241909	0.00965364	0.0345716	0.0342163	0	0	0.00404508	0.0178593	0.00432824	0.0539515	0	0.00990627	0.0357887	0.0238047	0.0562689	0.0209265	0.030221	0.0803872	0.0560119	0.0822961	0.00883664	0.0348438	0.0256125
Rgs8	0	0	0	0	0.00096008	0	0	0.00281354	0	0.00169057	0	0	0	0	0	0	0	0	0.00512301	0.00444461	0	0	0	0	0	0	0	0	0	0	0	0	0	0	0	0	0	0	0	0	0.00128265	0.00168478	0	0	0	0	0	0	0.00520833
Gm29529	0	0	0	0	0	0	0	0	0	0	0	0	0	0	0	0	0	0	0	0	0	0	0	0	0	0	0	0	0	0	0	0	0	0	0	0	0	0	0	0	0	0	0	0	0	0	0	0	0
C230024C17Rik	0	0	0	0.00472699	0	0.000873373	0.00115878	0	0.00391351	0	0.00316716	0	0.00481853	0.0055172	0.00160643	0.00103867	0	0	0	0	0.00217207	0	0.00370189	0	0	0.00502394	0	0.00773205	0.00373931	0.00142829	0	0	0.00226947	0	0.0100276	0	0.0150125	0.00134277	0.00279392	0	0	0	0	0.0110665	0.00364698	0.00404337	0	0	0
Rgs16	0.0239992	0.0298696	0.00809335	0.00953945	0.023228	0.00499331	0.00728229	0.0320617	0	0.0336032	0	0.00978681	0.0126973	0.0185123	0.0175561	0.0160797	0.0227082	0.0383042	0.0585669	0.0860923	0.00588511	0.0110073	0.0152329	0.0178249	0.0128935	0.00220074	0.0197658	0.0294076	0.0138625	0.0198307	0	0	0.0113015	0.0172392	0.0134905	0	0.06054	0.0167592	0.0163662	0.0243904	0.00189909	0.0194452	0.0290494	0.0151301	0.0492791	0.00658676	0.0172737	0.0291756	0.0487714
Gm28513	0	0	0	0.000618739	0.00213832	0.000934525	0.00100083	0	0.00416877	0	0	0	0.000983385	0.00174296	0.00609534	0	0.00152978	0.00451464	0	0	0.0027814	0.00155825	0.00241832	0.00352288	0.0037595	0	0.00243953	0.00205962	0.00333977	0.00733956	0	0	0.00258034	0.00460563	0	0	0	0	0.00576232	0.00348491	0	0	0.0088832	0	0.0050687	0	0	0.00401601	0
Rnasel	0.132125	0.0480517	0.186724	0.180816	0.266332	0.214375	0.167792	0.188138	0.169983	0.221147	0.18398	0.129862	0.294548	0.19129	0.29889	0.24943	0.250693	0.255121	0.269965	0.289667	0.119875	0.102556	0.149878	0.0903155	0.157518	0.201061	0.115702	0.192718	0.170448	0.174474	0.821895	0.0522488	0.370082	0.364314	0.431852	0.11828	0.137782	0.178797	0.218489	0.2448	0.25747	0.218137	0.244599	0.247397	0.290614	0.154263	0.131428	0.146263	0.154286
Rgsl1	0	0	0.00175645	0.00135284	0	0	0	0	0	0	0	0	0	0	0	0	0	0	0	0	0	0	0	0	0	0	0	0	0	0	0	0	0	0	0	0	0	0	0	0	0	0	0	0	0.00254609	0	0	0	0
Teddm2	0.0114099	0.00810273	0.0164136	0.0158174	0.0068999	0.00326869	0.000784462	0	0.00597645	0.00198045	0.00857939	0	0.0102024	0.00690288	0.00640977	0.00417362	0.00158781	0	0.00237544	0	0.00597034	0	0.00148978	0	0.00371709	0	0.00434192	0.00597491	0.00806686	0.00348432	0	0	0.0219241	0.00255379	0.0121547	0.0108638	0	0.0112397	0.0104256	0.00581722	0.00338428	0	0	0	0	0.00240198	0.00872041	0	0.00624348
Teddm1b	0	0	0	0	0	0	0	0	0.00454457	0	0	0	0	0	0	0.00295014	0	0	0	0	0	0	0	0	0.000679367	0.00237026	0	0	0.000753991	0	0	0	0	0	0	0	0	0	0	0	0	0	0	0	0	0	0	0	0
Teddm1a	0	0	0	0	0	0	0	0	0	0	0	0	0	0	0	0	0	0	0	0	0	0	0	0	0	0	0	0	0	0	0	0	0	0	0	0	0	0	0	0	0	0	0	0	0	0	0	0	0
Glul	0.579607	0.444305	1.19994	1.71946	1.64671	0.373043	0.183177	0.225185	0.360305	0.262083	0.578697	0.344354	0.956718	1.06261	1.02372	0.335828	0.138654	0.135882	0.197773	0.164058	0.445972	0.27108	0.30638	0.439431	0.26016	0.363201	0.244709	0.590637	0.459736	0.446468	1.64379	1.11202	1.25796	1.70015	1.6107	0.54598	0.359122	0.422209	0.493427	0.454701	0.245833	0.12809	0.087427	0.165103	0.141207	0.300157	0.177355	0.117158	0.181345
Gm29290	0	0	0	0	0	0	0	0	0	0	0	0	0	0	0	0	0	0	0	0	0	0	0	0	0	0	0	0	0	0	0	0	0	0	0	0	0	0	0	0	0	0	0	0	0	0	0	0	0
Gm29291	0	0	0.00319345	0	0	0	0	0	0	0	0	0	0	0	0	0	0	0	0	0	0	0	0	0	0	0	0	0	0	0	0	0	0	0.00193869	0	0	0	0	0	0	0	0	0	0	0	0	0	0	0
Gm28286	0	0	0	0	0	0	0	0	0	0	0	0	0	0	0	0	0	0	0	0	0	0	0	0	0	0	0	0	0	0	0	0	0	0	0	0	0	0	0	0	0	0	0	0	0	0	0	0	0
A830008E24Rik	0	0	0.00648154	0.00525894	0.00363044	0.00500643	0.00278826	0.00495864	0.0225518	0.00907936	0	0.00159184	0.0153784	0.0281119	0.0102435	0.00384796	0.00220704	0	0	0.00546751	0.011474	0	0.00668795	0.00403501	0.00438461	0.00244209	0	0.00769899	0.0018048	0.00464836	0	0	0.00557974	0.00432044	0.00756457	0	0	0.00603856	0.00412188	0.00526992	0.00310093	0.00407693	0	0	0	0.0101651	0.00286769	0	0.006476
Zfp648	0	0	0	0	0	0	0	0	0	0	0	0	0	0	0	0	0	0	0	0	0	0	0	0	0	0	0	0	0	0	0	0	0	0	0	0	0	0	0	0	0	0	0	0	0	0	0	0	0
4930452N14Rik	0	0	0	0	0	0	0	0	0	0	0	0	0	0	0	0	0	0	0	0	0	0	0	0	0	0	0	0	0	0	0	0	0	0	0	0	0	0	0	0	0	0	0	0	0	0	0	0	0
4930532M18Rik	0	0	0	0	0	0	0	0	0	0	0	0	0	0	0	0	0	0	0	0	0	0	0	0	0	0	0	0	0	0	0	0	0	0	0	0	0	0	0	0	0	0	0	0	0	0	0	0	0
Cacna1e	0	0	0.00481616	0.0132902	0.0158542	0	0	0.00195595	0	0	0	0.00272522	0.00431332	0.00916549	0.00932693	0	0	0	0	0	0	0	0	0	0.00140278	0	0	0.00218398	0.0106596	0.00197772	0	0	0.0285115	0.0320316	0.0242493	0	0	0.00133499	0	0.0012388	0	0	0	0	0	0	0	0	0
Gm29282	0	0	0	0	0	0	0	0	0	0	0	0	0	0	0	0	0	0	0	0	0	0	0	0	0	0	0	0	0	0	0	0	0	0	0	0	0	0	0	0	0	0	0	0	0	0	0	0	0
Gm9530	0	0.0110127	0.00383125	0.00854623	0.00189982	0.0055537	0.006113	0.00521946	0.0093373	0	0	0.00187946	0.00507682	0	0.00149367	0.00429717	0.00433926	0.0134454	0.020677	0.00737309	0.0033817	0.00153721	0.00111637	0.00296828	0.000745332	0.0107442	0.00347183	0.00289014	0.00393381	0	0	0	0.00167942	0.00463714	0.00234338	0	0	0	0.00248717	0.00264418	0.00732141	0.00247989	0.0113684	0.00583963	0.00379865	0.0073504	0.0143724	0.0040322	0.0119323
Ier5	0.563993	0.226824	0.331549	0.522674	0.385526	0.186355	0.11425	0.108763	0.0914719	0.118276	0.180809	0.125095	0.174025	0.298831	0.270895	0.267141	0.211481	0.248582	0.238798	0.189029	0.117995	0.153766	0.180404	0.170695	0.138676	0.410777	0.264787	0.272636	0.402668	0.428502	0	0.278547	0.213729	0.315282	0.279552	0.199577	0.200059	0.169095	0.234065	0.229163	0.264705	0.144792	0.135248	0.29253	0.168108	0.144378	0.1023	0.0994931	0.154811
Mr1	0.0972816	0.0636175	0.096332	0.115363	0.104622	0.0538574	0.0308044	0.0923432	0.0666706	0.0595636	0.0653656	0.0304844	0.0445587	0.0460373	0.0642572	0.0782647	0.0854075	0.0995187	0.0986415	0.0893947	0.0144034	0.0218773	0.0353432	0.0268657	0.0356162	0.0395475	0.0159166	0.0620452	0.0532098	0.0428764	0	0	0.0886893	0.0940452	0.111643	0.0501313	0.0274659	0.0424468	0.054299	0.0663663	0.0733282	0.0434754	0.114395	0.0704806	0.0823935	0.0429906	0.0198751	0.0728885	0.0407324
Stx6	0.475121	0.268886	0.219006	0.359615	0.352122	0.344248	0.24018	0.262666	0.328321	0.331919	0.316944	0.215878	0.175122	0.237118	0.245749	0.365539	0.300304	0.314226	0.369227	0.372054	0.266645	0.212415	0.164508	0.167718	0.253968	0.249036	0.231148	0.154072	0.229659	0.208053	0.821895	0.151234	0.252902	0.25456	0.289253	0.249545	0.100389	0.121203	0.184881	0.279711	0.336313	0.327317	0.299898	0.451209	0.414083	0.265509	0.210187	0.277066	0.270989
BC034090	0.170858	0.0645336	0.111661	0.124609	0.0917144	0.125618	0.129139	0.25296	0.147749	0.181312	0.098862	0.163399	0.0685688	0.0748371	0.0619683	0.146857	0.139823	0.132766	0.141165	0.110633	0.0911192	0.092356	0.135385	0.0826062	0.129764	0.172017	0.106845	0.121971	0.10243	0.109936	0	0	0.0499667	0.0375289	0.0442466	0.108477	0.131026	0.103045	0.0862218	0.057572	0.185711	0.187474	0.273208	0.14445	0.219683	0.154655	0.144844	0.268917	0.131878
Gm37622	0	0	0	0	0	0	0	0	0	0	0	0	0	0	0	0	0	0	0	0	0	0	0	0	0	0	0	0	0	0	0	0	0	0	0	0	0	0	0	0	0	0	0	0	0	0	0	0	0
Xpr1	0.545058	0.428791	0.329144	0.505267	0.41392	0.379021	0.255117	0.33081	0.431036	0.358321	0.311935	0.292419	0.261104	0.377952	0.389188	0.465172	0.355183	0.45392	0.395435	0.477716	0.287763	0.258721	0.296334	0.302328	0.29109	0.377006	0.349777	0.311748	0.345338	0.299516	0	0.147164	0.282353	0.385354	0.339229	0.164254	0.266168	0.301578	0.301906	0.316812	0.346815	0.323198	0.276507	0.341102	0.393798	0.33183	0.26772	0.320619	0.285016
Gm5532	0	0	0.012658	0.0127956	0.00773518	0.0109191	0.0061211	0.00477372	0.00611882	0.00887232	0.00326902	0.00232504	0.0203984	0.0271521	0.0230911	0.0118718	0.0180491	0	0.0172127	0.0108412	0.00829311	0.00432048	0.0219208	0.0510505	0.0176862	0.0054181	0.00813951	0.0207042	0.0371992	0.0207619	0	0	0.00123826	0.00231273	0	0.0159531	0.00626308	0.0298997	0.058208	0.0272065	0.0230776	0.0129132	0.00643232	0	0.0176425	0.0245783	0.00515887	0.00677522	0.0345222
Acbd6	1.05557	0.963288	0.918979	0.959694	1.00007	0.965505	1.05947	0.997417	1.18505	1.01749	1.04816	0.993963	1.12812	1.19082	1.14163	1.0062	0.971426	0.889276	1.02134	0.858834	1.02852	1.11238	1.07094	1.13017	1.18286	1.07973	1.12777	1.13401	1.15192	1.15833	0.821895	1.02404	0.997397	1.00708	0.999588	1.18517	1.09833	1.113	1.3072	1.28651	0.955077	0.888359	0.901324	1.09109	0.985905	1.02406	1.07208	0.935645	1.01487
Lhx4	0	0	0	0	0	0	0	0.00305856	0	0	0	0	0	0	0	0	0	0	0	0	0	0.000962876	0	0.00196663	0.00292137	0	0	0	0.00155862	0.000834569	0	0	0	0	0	0	0	0	0	0.00290863	0.00154247	0	0	0	0	0	0.00247887	0	0
Qsox1	0.94187	0.78265	0.400638	0.36401	0.306127	0.406408	0.4042	0.43875	0.273084	0.279693	0.548452	0.341407	0.275805	0.224586	0.199858	0.391225	0.464349	0.685486	0.385454	0.357848	0.288401	0.303853	0.276608	0.200684	0.250278	0.346718	0.301259	0.235305	0.260024	0.291797	0	0.721343	0.283842	0.337666	0.275611	0.414753	0.437624	0.238934	0.236835	0.26161	0.357769	0.37423	0.507785	0.435944	0.280142	0.335055	0.330456	0.402241	0.32698
Gm37571	0	0	0	0	0	0	0	0	0	0	0	0	0	0	0	0	0	0	0	0	0	0	0	0	0	0	0	0	0	0	0	0	0.00155649	0	0	0	0	0	0	0	0	0	0	0	0	0	0	0	0
Cep350	0.395589	0.570159	0.339293	0.408263	0.4273	0.40833	0.448997	0.446736	0.330583	0.403355	0.388616	0.379281	0.302528	0.308635	0.382006	0.343569	0.494479	0.487207	0.380387	0.377378	0.364648	0.352744	0.33849	0.338654	0.37788	0.470614	0.513431	0.455386	0.436463	0.474246	0.821895	0.81543	0.372965	0.466839	0.431865	0.300164	0.395957	0.28399	0.215906	0.321835	0.380472	0.451309	0.421665	0.293491	0.388091	0.378821	0.381472	0.445705	0.434299
Tor1aip1	1.55163	1.03826	0.592347	0.708231	0.770487	1.3338	1.08225	0.894502	0.774764	0.749698	1.18836	0.83991	0.487954	0.578261	0.564072	1.46236	1.21125	1.16121	1.05163	0.957186	1.15852	0.782766	0.726003	0.74026	0.76593	1.23498	0.778304	0.705584	0.799039	0.78424	0.821895	1.64735	0.442845	0.568237	0.553796	1.27124	0.666305	0.505803	0.59283	0.593271	1.40065	1.18658	1.00605	0.937513	0.898596	1.23676	0.984821	1.01039	0.757904
Tor1aip2	0.970066	0.538875	0.456501	0.586667	0.644803	0.992681	0.64086	0.579037	0.716968	0.592877	0.864311	0.516682	0.361139	0.611843	0.532442	1.10073	0.632656	0.578635	0.755728	0.731164	0.796192	0.635395	0.508022	0.536761	0.561847	0.824105	0.615333	0.428048	0.655743	0.704557	2.46569	0.508617	0.408379	0.501052	0.596638	0.784629	0.559555	0.457602	0.479911	0.644667	0.985132	0.598421	0.506033	0.88299	0.55795	0.974822	0.620106	0.602243	0.608863
Fam163a	0	0	0	0.00537048	0	0	0.00202931	0	0	0	0	0	0	0.00364144	0.00527411	0	0	0	0	0	0	0.00138796	0	0	0	0	0	0	0	0	0	0	0	0.00192783	0.00323156	0	0	0	0	0.00288107	0	0	0	0	0	0.00136147	0	0	0
Tdrd5	1.3149	1.63954	3.19979	2.72256	3.37105	0.758993	1.20796	1.48404	1.15031	1.56459	0.846685	1.93206	5.24621	4.10501	5.18309	0.635449	0.801191	0.827736	0.663349	0.923018	0.540437	0.987254	2.27748	1.71767	1.50073	0.527769	0.940899	3.08787	2.17979	2.34002	3.28758	4.70008	6.28277	6.30547	6.73584	0.538135	1.22368	3.25842	2.48045	2.7593	0.475286	0.593536	0.604197	0.593763	0.52551	0.488414	0.688063	0.721354	0.771585
4930518J20Rik	0	0	0	0.00230815	0	0.00102909	0	0	0	0	0	0	0	0	0	0	0	0	0	0	0	0	0	0	0	0	0.00223428	0	0	0	0	0	0	0	0.00108816	0.00749209	0	0	0.00281443	0	0	0	0	0	0.00267389	0	0	0	0
Nphs2	0.0101865	0.0618597	0.0237374	0.0231443	0.0180537	0.0234199	0.00852406	0.00695454	0.00906991	0.00325945	0.0118386	0.0107081	0.0233675	0.0128422	0.0263984	0.0201504	0.0100413	0.0152688	0.0144091	0.0241664	0.0147936	0.00513479	0.0115937	0.00159729	0.0090326	0.0067061	0.0112931	0.0157346	0.00723889	0.0179265	0	0	0.0234749	0.00634575	0.0255627	0	0.0105859	0.0297685	0.0175203	0.00842347	0.0197382	0.0197041	0.0134763	0.0207948	0.0165742	0.0160499	0.0140638	0.00246806	0.0120795
Axdnd1	0.121	0.0387892	0.0209733	0.0425877	0.0216197	0.0840178	0.0457072	0.0244304	0.0321751	0.0245248	0.0647685	0.0262611	0.0294704	0.0284932	0.0323026	0.08782	0.0241044	0.0226314	0.0100537	0.0183798	0.0431686	0.0455735	0.061168	0.0256982	0.0355488	0.0491562	0.0339923	0.0459761	0.0431073	0.0409805	0	0	0.00858049	0.0340938	0.00884533	0.132155	0.0198064	0.0366331	0.0521641	0.0300463	0.0821024	0.0320279	0.0294834	0.0204028	0.0179614	0.066206	0.0538823	0.029257	0.0384951
Gm2000	0.594437	0.400974	0.368346	0.332635	0.680282	0.59517	0.349846	0.41116	0.317856	0.832551	0.55953	0.389433	0.435765	0.424741	0.845011	0.601704	0.30375	0.290857	0.259034	0.65224	0.670579	0.421136	0.430743	0.374675	0.726374	0.518917	0.316421	0.356925	0.308289	0.645968	0.821895	0.551106	0.409722	0.449508	0.781776	0.665265	0.340303	0.396448	0.433993	0.836105	0.54044	0.273547	0.268413	0.334413	0.739808	0.583703	0.36606	0.24792	0.381471
Soat1	3.80031	3.21801	1.99606	2.55227	2.3572	6.47014	5.84671	4.22858	4.04475	5.69297	5.68428	3.42649	2.539	2.53053	2.99329	6.93174	6.73867	5.09452	5.15416	7.98195	4.50804	2.83835	2.16567	2.2089	3.0586	5.62535	2.76085	2.43145	2.65566	3.57185	14.7941	4.1465	2.7641	2.90379	3.31619	4.02129	2.03753	2.17736	2.56741	2.93177	6.72807	7.34294	5.90854	5.71236	7.9432	5.30524	5.50942	4.1831	4.21222
Gm10031	0.00858926	0.0599936	0.0259674	0.0418763	0.040311	0.022932	0.0338287	0.0228964	0.0513037	0.0355969	0.0238494	0.0280901	0.0310176	0.041394	0.0328903	0.0228156	0.0324001	0.0175268	0.0136741	0.0526046	0.0266497	0.0225698	0.0253082	0.0424391	0.05441	0.0249273	0.0473391	0.0274266	0.0539099	0.0440824	0	0	0.0434033	0.0217668	0.0401708	0	0.0179024	0.0224899	0.0323707	0.0443036	0.0406765	0.0247345	0.0601605	0.0294899	0.0462756	0.0271301	0.02857	0.0441266	0.0364487
Abl2	0.247342	0.218623	0.257743	0.183127	0.209196	0.198052	0.257775	0.265083	0.196435	0.232037	0.20793	0.243926	0.228924	0.156902	0.19706	0.226293	0.285456	0.270309	0.224544	0.24939	0.168718	0.169708	0.214201	0.187269	0.181793	0.237424	0.248723	0.232065	0.187954	0.207528	0	0.174795	0.221455	0.193119	0.268295	0.233291	0.262493	0.176399	0.133976	0.159989	0.21918	0.219516	0.206261	0.313628	0.23133	0.220379	0.173154	0.231035	0.195066
Tor3a	0.0389091	0.034527	0.064635	0.0815454	0.0721351	0.0312155	0.0257094	0.0524072	0.0312555	0.0208629	0.0275521	0.0270378	0.0453	0.0506925	0.0588229	0.0384111	0.0226986	0.0236533	0.0685681	0.0650794	0.0207489	0.0227466	0.0330836	0.0457577	0.0433013	0.025702	0.0484782	0.0362373	0.056629	0.0304436	0	0.0961686	0.0655311	0.0748002	0.0814506	0.00560824	0.0298642	0.0541271	0.0512176	0.0704436	0.032999	0.0150205	0.0268348	0.0400947	0.0308892	0.018403	0.0200413	0.0366885	0.024295
Fam20b	0.194793	0.188121	0.161069	0.192677	0.197077	0.242547	0.194583	0.223307	0.241014	0.248471	0.223116	0.234393	0.178817	0.18594	0.234637	0.238059	0.209699	0.247094	0.394788	0.305032	0.220757	0.19287	0.204584	0.243761	0.250464	0.295948	0.176776	0.196959	0.289273	0.26909	0	0.0935769	0.17115	0.221712	0.263063	0.115057	0.158798	0.146679	0.20957	0.215042	0.18436	0.191046	0.207432	0.290912	0.27084	0.243884	0.225141	0.257648	0.261704
Ralgps2	1.4198	1.40174	0.610074	0.775552	0.777508	1.33782	1.38059	1.13158	1.31491	1.3529	1.32671	1.10159	0.805311	0.740567	0.902775	1.25814	1.43551	1.59708	1.4908	1.54221	1.09782	1.03977	0.941154	0.922355	1.04276	1.46864	1.22106	1.09741	1.12062	1.08665	1.64379	0.880405	0.688962	0.823087	0.775441	1.21324	1.06602	0.909195	1.07463	1.05482	1.34907	1.27802	1.39801	1.07015	1.41322	1.2382	1.34547	1.25736	1.31756
Angptl1	0.5107	0.980427	0.0732581	0.0810965	0.0669831	0.50672	0.631067	0.60395	0.693074	0.538326	0.993448	1.18846	0.334126	0.297762	0.330663	0.42162	0.575211	0.663418	0.469177	0.451023	0.372277	0.342539	0.267723	0.177802	0.13844	0.428371	0.487992	0.353591	0.233691	0.223237	3.28758	0.417202	0.151954	0.088102	0.119768	0.558293	0.404678	0.292558	0.224662	0.203454	0.435779	0.589138	0.60378	0.508807	0.42721	0.321659	0.463529	0.423594	0.293007
4930439D14Rik	0	0	0	0.00181494	0	0.0011646	0	0.00425748	0	0.00189234	0	0	0.00119348	0.00184347	0	0	0.00142446	0	0.01179	0.0072749	0.00182736	0.00161724	0.0018467	0	0.000694327	0	0.00173749	0.000768508	0	0	0	0	0	0	0	0	0	0	0	0.00653854	0.00362453	0	0.00589577	0	0	0.00295449	0.00276732	0	0
Gm28694	0	0	0	0.000783053	0	0.00125556	0	0	0	0	0	0	0.00127843	0	0	0	0	0	0	0	0	0	0.00361448	0	0.00131536	0	0	0	0.00149161	0.00311183	0	0	0	0	0	0	0	0.00276881	0	0.00216277	0.00190334	0	0	0	0	0.00160609	0	0	0
Tex35	0	0	0.00120376	0	0	0.000825713	0	0	0	0	0	0	0	0	0	0.000585289	0	0	0	0	0	0.00153063	0	0.00193257	0	0	0.00171248	0.00178651	0	0.00203651	0	0.0786262	0	0	0.00258047	0	0	0	0	0.00139514	0.00179313	0	0	0	0	0	0	0	0
Rasal2	0.250573	0.182682	0.141065	0.150945	0.169836	0.300094	0.171723	0.153348	0.131006	0.184583	0.287582	0.152403	0.124745	0.132652	0.18333	0.274296	0.202438	0.186162	0.254758	0.248587	0.26979	0.249808	0.210545	0.265939	0.260304	0.367963	0.255782	0.214695	0.333162	0.315732	0	0	0.116638	0.174956	0.166109	0.240877	0.216966	0.195283	0.215144	0.22525	0.263793	0.177102	0.144426	0.110756	0.1348	0.275303	0.159032	0.246181	0.202122
Cryzl2	0.372457	0.365369	0.396408	0.301015	0.254548	0.209956	0.258129	0.3291	0.259917	0.225253	0.236002	0.284217	0.36651	0.328975	0.241252	0.249688	0.321431	0.361434	0.177757	0.2528	0.154853	0.195152	0.261493	0.250587	0.212598	0.0963257	0.143155	0.206629	0.165056	0.13759	0	0.369312	0.354786	0.312113	0.25615	0.198973	0.145153	0.295298	0.312783	0.235182	0.238955	0.256146	0.333029	0.209612	0.202359	0.19853	0.214472	0.347437	0.204666
Gm15486	0	0	0	0	0	0	0	0	0	0	0	0	0	0	0	0	0	0	0	0	0	0	0	0	0	0	0	0	0	0	0	0	0	0	0	0	0	0	0	0	0	0	0	0	0	0	0	0	0
Sec16b	0	0	0.0010909	0.00118345	0.00169373	0.000893546	0	0	0	0	0.00439319	0	0	0	0.00115667	0.00375565	0	0	0	0.00400389	0	0	0.00184478	0	0.00246215	0	0	0	0	0	0	0	0	0	0	0	0	0.00148421	0	0.00179056	0	0.0035093	0	0	0	0	0	0	0
Brinp2	0.0128395	0.0961214	0.00488361	0.0151316	0.0144024	0.0117373	0.0156354	0.0021536	0	0.00504267	0	0.0125728	0.00126508	0.00248185	0	0.01217	0.0223235	0.0420075	0.0164644	0.075561	0	0.0060266	0.00144082	0.00327397	0.0140949	0	0.0168603	0	0.00399325	0.00349784	0	0	0.00163983	0	0.00438259	0	0	0	0	0.00330314	0	0.00660759	0.0110721	0.0227264	0	0.00215949	0.00280112	0.0165222	0
Astn1	0.0153373	0	0	0.00159047	0.0103911	0.00199719	0	0	0	0.00641971	0	0	0.00130078	0.00185467	0	0.00287758	0	0.0045942	0.0212505	0.00295851	0.00235535	0.00235602	0	0	0.0034123	0	0.00622489	0.00246861	0.00359776	0.00290369	0	0	0	0.00288985	0	0	0.0179927	0	0	0	0	0	0	0	0	0	0	0	0
Gm37679	0	0	0.0008312	0	0	0	0	0	0	0	0	0	0	0	0	0	0	0	0	0	0	0	0	0	0	0	0	0	0	0	0	0	0	0	0	0	0	0	0	0	0	0	0	0	0	0	0	0	0
Pappa2	0	0.0114288	0.00165798	0.00316656	0	0	0	0	0	0	0	0	0	0	0	0	0	0	0	0	0	0	0	0	0	0	0	0.000299072	0	0	0	0	0	0.00181042	0.00263065	0	0	0	0	0	0	0	0	0	0	0	0	0	0
1600012P17Rik	0	0	0	0	0	0	0	0	0	0	0	0	0	0	0	0	0	0	0	0	0	0	0	0	0	0	0	0.000654403	0	0	0	0	0	0	0	0	0	0	0	0	0	0	0	0	0	0	0	0	0
4930562F17Rik	0	0	0.00726468	0.000998325	0.00339872	0	0	0	0	0	0	0	0.00105925	0	0	0	0	0	0	0	0	0	0	0	0	0	0	0.000882318	0	0	0	0	0.0116898	0.0108836	0.00720219	0	0	0.00061811	0	0	0	0	0	0	0	0	0	0	0.00280218
Cop1	0.823389	0.962231	1.61341	1.41248	1.48969	0.654637	0.571434	0.677993	0.578728	0.693288	0.586217	0.675418	1.22191	1.18862	1.25058	0.631873	0.620652	0.618567	0.665526	0.617116	0.619669	0.482702	0.529824	0.618456	0.589691	0.591048	0.491866	0.816076	0.764045	0.823042	0	3.30163	2.61752	2.89741	2.87723	0.565388	0.50517	0.535395	0.63911	0.663606	0.740514	0.651766	0.684712	0.763439	0.619888	0.573356	0.523415	0.54825	0.549129
Tnr	0	0.0143701	0	0.00311823	0.000824464	0	0	0.00204873	0	0.00289646	0.00465451	0	0.00246074	0.00222751	0	0	0	0	0	0	0	0	0.00405993	0	0.00119607	0.00309611	0	0.000945363	0.00083291	0.00241052	0	0	0.00185743	0	0	0	0	0.00279131	0	0	0	0	0	0	0.00267389	0	0	0.00554735	0
Gm38039	0	0	0	0	0	0	0	0	0	0	0	0	0	0	0	0	0	0	0	0	0	0	0	0	0	0	0	0	0	0	0	0	0	0	0	0	0	0	0	0	0	0	0	0	0	0	0	0	0
Gm37294	0	0	0	0	0.00135249	0	0	0	0	0	0	0.00291382	0	0	0	0	0	0	0	0	0	0	0	0	0	0	0	0	0	0	0	0	0	0	0	0	0	0	0	0	0	0	0	0	0	0	0	0	0
4930523C07Rik	0.213818	0.322388	0.307365	0.323152	0.21855	0.0563593	0.0855766	0.13073	0.148561	0.0666592	0.0323189	0.0810513	0.0962076	0.0803018	0.0641835	0.114954	0.185306	0.253451	0.239046	0.173727	0.0785045	0.0614213	0.0587893	0.0932589	0.0397139	0.184293	0.087645	0.151807	0.145484	0.0980326	0.821895	0.114986	0.245136	0.207604	0.151773	0.0701366	0.0855296	0.0688274	0.074326	0.0500067	0.0584468	0.0964137	0.149164	0.178787	0.0628228	0.0628473	0.0712123	0.0717287	0.142162
4930562F07Rik	0	0	0.0017788	0.00202549	0	0	0.00147011	0.00339416	0	0	0	0	0	0	0	0	0.00370481	0.00400443	0	0	0	0	0	0	0	0	0	0.000842252	0	0	0	0	0	0	0	0	0	0.00103929	0	0	0	0	0	0	0	0	0	0	0
Tnn	0	0	0	0	0	0	0	0	0	0	0	0	0	0	0	0	0	0	0	0	0	0	0	0	0	0	0	0	0	0	0	0	0	0	0	0	0	0	0	0	0	0	0	0	0	0	0	0	0
Mrps14	1.05909	0.847205	0.987196	1.16248	1.29855	1.02931	0.918841	0.933958	1.19865	1.24054	1.14236	0.920673	0.924846	1.18454	1.17834	1.07678	0.905253	0.934827	0.997547	1.0618	1.04204	1.07269	1.24904	1.58414	1.53909	1.40729	1.29371	1.20368	1.57063	1.57579	0.821895	0.971835	0.825704	1.0155	1.03216	1.19051	1.33547	1.29815	1.52361	1.62502	1.11205	0.973737	0.726848	1.16506	1.22639	1.15475	0.999862	0.90462	1.16698
Cacybp	1.53089	1.52244	1.24207	1.32193	1.86083	1.69935	1.90903	1.66165	1.84417	2.0175	1.54601	1.62213	1.18095	1.36158	1.64166	1.56509	1.86454	1.61242	1.70586	1.86197	2.2858	2.45084	1.92106	2.35271	2.5494	2.82767	2.62782	1.89771	2.2925	2.63667	0	1.51439	1.06869	1.13596	1.47636	1.57443	2.164	1.49933	2.00504	2.10943	1.71557	1.81635	1.59235	1.85379	2.03578	2.24858	2.34926	2.47551	2.43497
Rabgap1l	0.438099	0.265494	0.265416	0.307267	0.266632	0.384091	0.317107	0.335075	0.367718	0.281824	0.408517	0.316675	0.222219	0.375879	0.361907	0.308465	0.219984	0.270812	0.203697	0.254785	0.36516	0.214081	0.166816	0.291569	0.248533	0.404668	0.250417	0.280935	0.339894	0.320698	0	0	0.227714	0.283502	0.293843	0.2268	0.23219	0.220372	0.311922	0.289855	0.384475	0.195923	0.301609	0.368404	0.241254	0.311241	0.267015	0.199469	0.302503
Gm36975	0	0.0115139	0	0	0	0.000800766	0	0	0	0	0	0	0	0	0	0	0	0	0	0	0	0	0	0	0	0	0	0	0	0	0	0	0.00136833	0	0	0	0	0	0	0	0	0	0	0	0	0	0.00220078	0	0
Gm37083	0	0	0	0	0	0	0	0	0	0	0	0	0	0	0	0	0	0	0	0	0	0	0	0	0	0	0	0	0	0	0	0	0	0	0	0	0	0	0.00302605	0	0	0	0	0	0	0	0	0	0
Gm38060	0	0	0	0	0	0	0	0	0	0	0	0	0	0	0	0	0	0	0	0	0	0	0	0	0	0	0	0	0	0	0	0	0	0	0	0	0	0	0	0	0	0	0	0	0	0	0	0	0
Rc3h1	0.536582	0.783927	0.647079	0.687949	0.660093	0.66373	0.723116	0.574735	0.647363	0.609311	0.758758	0.74904	0.657867	0.768411	0.588246	0.60074	0.776537	0.64598	0.829399	0.468697	0.551888	0.587004	0.550244	0.608746	0.521812	0.68565	0.640279	0.605712	0.658304	0.57244	3.28758	1.90731	0.807714	0.806894	0.943791	0.522344	0.697419	0.516622	0.602308	0.512529	0.687229	0.672335	0.556783	0.561631	0.562226	0.642742	0.593578	0.463068	0.682337
Serpinc1	0.0598726	0.032562	0.0760126	0.0633421	0.0343627	0.0335825	0.0125666	0.0116148	0.0227312	0.0308291	0.0467798	0.0154131	0.0395465	0.0842644	0.0251559	0.0440058	0.0174355	0.0158796	0.0227679	0.0135143	0.0309438	0.0844104	0.0705525	0.0576572	0.00781779	0.023352	0.0724813	0.0638959	0.0585375	0.018679	0	0.063991	0.0767508	0.0417356	0.0323947	0.0730786	0.159936	0.0663866	0.0378535	0.00822973	0.0208439	0.005638	0.0125792	0.0155745	0.003443	0.0329194	0.0133451	0.0397527	0.0479992
Zbtb37	0.153845	0.0798452	0.114651	0.230561	0.202151	0.14501	0.108492	0.11066	0.136952	0.145192	0.0982369	0.0769871	0.112728	0.123281	0.14409	0.131623	0.100546	0.153325	0.190377	0.169621	0.109158	0.0864394	0.091086	0.10803	0.129102	0.133111	0.106473	0.0773521	0.11295	0.138743	0.821895	0.310356	0.123328	0.18765	0.217908	0.100277	0.0979795	0.1148	0.133512	0.136615	0.128651	0.117822	0.155094	0.189623	0.158134	0.145231	0.085802	0.0667609	0.169025
Gm37362	0	0	0.0012848	0	0	0.000902793	0.00100434	0	0	0	0	0	0	0	0.00304809	0	0	0	0	0	0	0.00144446	0.00148598	0	0.000961749	0	0.00588722	0.00109296	0	0	0	0	0	0	0	0	0	0	0	0	0	0	0	0	0	0	0	0.00949213	0
Dars2	0.065415	0.015603	0.0594106	0.0405176	0.0816529	0.0720706	0.0649134	0.0568087	0.0659796	0.0789906	0.0791117	0.0759673	0.0512328	0.0523154	0.0758295	0.0700883	0.0497843	0.0657683	0.0445574	0.0585034	0.128803	0.0957587	0.104189	0.161965	0.114651	0.242957	0.222009	0.170551	0.181516	0.22772	0	0	0.0441467	0.0672425	0.0810367	0.0860434	0.0988606	0.0884915	0.0654841	0.102633	0.0738879	0.0737923	0.0831277	0.0974042	0.0743513	0.113056	0.086787	0.0754616	0.104054
Gm37634	0.00979301	0	0	0	0.00135076	0.00455851	0.00114527	0	0.00636834	0.00303225	0	0.0045461	0.00246399	0.0139267	0.00757295	0.00295885	0.00349061	0.00401368	0.010518	0.00406498	0.0013466	0.00794651	0.00454137	0.00401139	0.00146115	0.00216658	0.0128465	0.00076769	0.00169038	0.00257569	0	0	0.00117952	0.00502649	0	0	0.00820703	0.00251686	0.0127688	0.00335354	0	0	0	0	0.00604703	0.00180395	0.00443145	0.0107907	0
Cenpl	0.00858926	0.0492533	0.0339331	0.027707	0.0400683	0.0288022	0.0365952	0.0125838	0.0188056	0.0435394	0.00324711	0.0192698	0.0198366	0.0106284	0.0245484	0.0236384	0.0298227	0.0117966	0.0337971	0.0224372	0.0432846	0.0373503	0.0354499	0.0194772	0.0313757	0.359293	0.441382	0.325676	0.33066	0.364077	0	0.0576568	0.0309083	0.0213783	0.0568245	0.0380373	0	0.0177953	0.0206475	0.0161763	0.0214021	0.0205182	0.0294213	0.0194422	0.0193131	0.0329124	0.025201	0.0595801	0.0196908
Klhl20	0.0785985	0.119907	0.0742708	0.117604	0.113395	0.077036	0.0354725	0.044836	0.0685379	0.0876687	0.0624485	0.036187	0.0637785	0.0747584	0.114276	0.0765415	0.0454334	0.0695281	0.121358	0.085638	0.0617402	0.0621171	0.0592457	0.0929033	0.0817097	0.108981	0.0401916	0.0746104	0.0910147	0.113482	0	0	0.08655	0.114345	0.117242	0.108506	0.0343149	0.0522293	0.0887603	0.0726783	0.0985432	0.0681373	0.0517207	0.0504681	0.0841656	0.0703753	0.063963	0.03294	0.0633848
Ankrd45	0	0	0	0.00229115	0.000618578	0.0011744	0	0	0	0.00322729	0.00632364	0	0	0.00183866	0.00244297	0.00134183	0.00169511	0	0	0.00350491	0.00373661	0	0.00124365	0	0.00123068	0	0.00234841	0	0.00132164	0.000697891	0	0	0	0	0	0	0.00804994	0.00235116	0	0	0.00370426	0	0	0	0	0	0	0	0
Tex50	0	0	0	0	0	0	0	0	0	0	0	0	0	0	0	0	0	0	0	0	0	0	0	0	0	0	0	0	0	0	0	0	0	0	0	0	0	0	0	0	0	0	0	0	0	0	0	0	0
Prdx6	2.79273	3.47573	3.30131	2.74347	2.56115	3.36679	4.25475	3.83796	3.61774	3.38184	3.84153	4.58997	4.14645	3.42253	3.22732	3.0487	3.53473	3.19911	3.18636	2.96636	3.62203	4.4666	4.24609	3.80078	3.30358	2.61643	3.1816	3.14103	2.70687	2.3385	3.28758	3.8876	3.46409	2.87688	2.72643	4.68936	4.37131	3.99748	3.45713	3.36297	3.1569	3.69477	3.64665	3.41705	3.14973	3.4865	4.16611	3.9819	3.72
Tnfsf4	0	0	0	0	0	0	0	0	0	0	0	0	0.00417918	0	0	0	0	0	0	0	0	0	0	0	0	0	0	0	0	0	0	0	0.00188711	0	0.00170469	0	0	0	0	0.00160596	0.0016367	0	0	0	0	0	0	0	0
Tnfsf18	0	0	0	0	0.00109682	0	0	0	0	0	0	0	0	0	0	0	0	0	0	0	0	0	0	0	0	0	0	0	0	0.00140528	0	0	0	0	0	0	0	0	0	0	0	0	0	0	0	0	0	0	0
Fasl	0	0	0	0	0	0	0	0	0	0	0	0	0	0	0	0	0	0	0	0	0	0	0	0	0.00440462	0	0	0	0	0	0	0	0	0	0	0	0	0	0	0	0	0	0	0	0	0	0	0	0
Suco	0.439793	0.469251	0.28619	0.41651	0.361585	0.390876	0.470467	0.434195	0.407196	0.276316	0.519648	0.375952	0.333303	0.335921	0.368464	0.441643	0.493296	0.533082	0.553165	0.455127	0.462594	0.421587	0.337033	0.333376	0.403467	0.583349	0.528317	0.426393	0.522672	0.438349	0	0.3191	0.364544	0.435933	0.448861	0.295387	0.358264	0.245314	0.293515	0.334808	0.422237	0.448672	0.415471	0.458486	0.4459	0.460482	0.438046	0.459096	0.501528
Gm31925	0	0	0	0	0	0	0	0	0	0	0	0	0	0	0	0	0	0	0	0	0	0	0	0	0	0	0	0	0	0	0	0	0	0	0	0	0	0	0	0	0	0	0	0	0	0	0	0	0
4930558K02Rik	0	0.00804942	0	0	0.00294474	0.0011744	0	0	0.00296054	0	0	0	0	0	0	0.00292352	0	0.00434584	0	0.00365191	0.00235535	0	0	0	0.00237829	0	0	0	0	0.00165611	0	0	0.00213974	0.00304906	0	0	0	0	0	0.000887366	0.00199289	0.00239139	0	0	0.003273	0	0	0	0
Pigc	0.104843	0.0474882	0.0755771	0.110176	0.149206	0.0819121	0.0494055	0.0703849	0.0995184	0.0764791	0.0972386	0.059262	0.0689198	0.063456	0.142523	0.102293	0.0631294	0.0619513	0.0864918	0.163242	0.0910089	0.0602524	0.0533613	0.04829	0.0824359	0.108327	0.0858958	0.0579558	0.104793	0.11259	0	0.144626	0.0843869	0.103216	0.122613	0.0576038	0.0756405	0.0765015	0.0740831	0.0944086	0.122979	0.0724155	0.0629044	0.0855331	0.100191	0.075018	0.065084	0.06201	0.0385858
Gm38304	0	0	0	0.000704094	0.000890925	0	0	0	0	0	0	0	0	0	0	0	0	0	0	0	0	0	0	0	0	0	0	0	0	0	0	0	0	0	0	0	0	0	0	0	0	0	0	0	0	0	0	0	0
Dnm3	0.0703336	0.0357988	0.029982	0.019505	0.0130086	0.0298335	0.0166624	0.00779971	0.0131768	0.00368976	0.0201706	0.0113479	0.0090441	0.00404448	0.0084709	0.0409835	0.0184725	0.038606	0.0145021	0.0174496	0.0246229	0.0166793	0.0107711	0.0127997	0.00168488	0.0374504	0.0141297	0.0084468	0	0.00760352	0	0	0.0241072	0.0167838	0.011901	0.0184144	0.0157969	0.0132022	0.0149979	0.00680496	0.0428961	0.017152	0.0276616	0.0169795	0.0365172	0.0433417	0.0223036	0.0149381	0
2810442N19Rik	0	0	0	0	0	0	0	0	0	0	0	0	0	0	0	0	0	0	0	0	0	0	0	0	0	0	0	0.000870257	0	0.00130345	0	0	0	0	0	0	0	0	0	0	0.00165022	0	0	0	0	0.00173802	0	0	0
Dnm3os	0	0.0224261	0.00706132	0.00360513	0.0046482	0.00494636	0.000990623	0	0.00858226	0.00157726	0.00918167	0	0.00968357	0	0.00337995	0.00782329	0.0069169	0	0	0.00250829	0.00237412	0.0128606	0.00502406	0	0.000634471	0.00437841	0.0149188	0.00317752	0.00523154	0.00156302	0	0	0	0	0.00228387	0	0	0.00586766	0.00224755	0	0.00886569	0.00247989	0.00742082	0.0062931	0.0118214	0.00595953	0.00271201	0.00266335	0
Mettl13	0.128701	0.114753	0.122719	0.0879119	0.0912669	0.186343	0.154152	0.192116	0.147412	0.225668	0.175023	0.148118	0.178678	0.0943645	0.13252	0.151324	0.128416	0.121983	0.104444	0.097009	0.219501	0.225603	0.205555	0.174389	0.172308	0.247554	0.176313	0.145301	0.110822	0.132508	0.821895	0	0.127859	0.121417	0.102415	0.253293	0.240299	0.160044	0.103602	0.144554	0.192347	0.228413	0.125166	0.171644	0.16979	0.225319	0.16701	0.215147	0.156608
Vamp4	0.624164	0.326251	0.326349	0.38855	0.401124	0.890258	0.349911	0.330323	0.474494	0.564346	0.859476	0.331226	0.297679	0.363295	0.341484	0.741023	0.361121	0.371362	0.454102	0.704682	0.743961	0.36219	0.432882	0.526665	0.552526	0.964099	0.467371	0.433895	0.606597	0.552174	0.821895	0.066306	0.267807	0.374132	0.328868	0.994827	0.529624	0.387097	0.411044	0.497684	0.799579	0.413798	0.460861	0.540406	0.635963	0.815555	0.359488	0.385349	0.51313
Myoc	0	0	0.00164429	0.00385347	0.00582384	0.00921714	0.00436178	0.00258785	0.00557426	0.00309352	0.0161097	0.00269995	0	0	0.0049415	0.0111621	0.00212579	0.00406645	0	0.00385374	0.00355198	0.00153721	0.00842861	0.00930049	0.00326593	0.00449908	0	0.0136869	0.00771155	0.00945656	0	0	0.00148416	0	0	0	0.00342462	0.00957112	0.00218219	0.00675638	0.0096529	0	0	0.00440283	0.00879617	0.00205871	0.00241774	0.00501935	0
Myocos	0	0	0	0	0	0.0094102	0.00154085	0	0	0.00625302	0.00899561	0	0.00112767	0	0	0.0108971	0.00346162	0	0	0.00502989	0.00173043	0.00339389	0.00344882	0.00392999	0.00173657	0.00183206	0.00190044	0.000932332	0.0046212	0.00182433	0	0	0	0.00411094	0	0.0293062	0	0	0	0	0.0103126	0.0076946	0	0.00587114	0	0.00595937	0	0.00512678	0
Prrc2c	4.17285	4.37114	3.04123	3.18107	3.04547	4.52105	5.16019	4.48132	3.69615	4.03724	3.89015	3.93886	3.03763	2.97495	3.11781	4.47178	5.14006	4.85695	4.20974	3.92935	3.99306	3.85292	3.3225	3.20134	3.35708	4.70362	4.25923	3.37277	3.48163	3.33176	3.28758	4.6369	3.32343	3.01542	3.20116	3.13081	3.41243	2.90616	2.4912	2.66386	4.60884	5.27515	4.65303	4.61303	4.29991	4.51668	5.07132	4.35267	3.84348
Fmo4	0	0	0	0	0.00103349	0	0.000785061	0.00129702	0	0	0	0	0	0	0.0029099	0.000860433	0	0	0	0	0	0	0.00405993	0	0	0	0	0	0	0	0	0	0.00137799	0	0	0	0	0	0	0	0	0	0.00750361	0	0	0	0	0.00355884	0
Fmo1	0	0	0.00280452	0.000652971	0.00196351	0.00100482	0	0.00312173	0	0.0034593	0.00323267	0	0.000822412	0	0.0129446	0	0	0	0	0	0	0	0.00262114	0	0.00102106	0	0	0.0015255	0.000753991	0.000612669	0	0	0	0	0	0	0.00830678	0	0	0.00227551	0.00156197	0.00324129	0	0	0	0	0	0	0
Fmo2	0	0	0.0114869	0.00556836	0.00515992	0.00264237	0.00497703	0.00187085	0	0.00196306	0.00388192	0.00677923	0.0105473	0.00920271	0.0137239	0.00125196	0.00455035	0.00573842	0	0	0.00431807	0.0067453	0.00646469	0.00460048	0.00456493	0	0	0.00789579	0	0	0	0	0.0353999	0.0184491	0.0429651	0	0.00955762	0.00128433	0	0.00389736	0	0	0.0179421	0	0.00257715	0.00300132	0	0	0
Fmo6	0	0	0	0	0	0	0	0	0	0	0	0	0	0	0	0	0	0	0	0	0	0	0	0	0	0	0	0	0	0	0	0	0	0	0	0	0	0	0	0	0	0	0	0	0	0	0	0	0
Fmo3	0	0	0	0	0	0	0	0	0	0	0	0	0	0	0	0	0	0	0	0	0	0	0	0	0	0	0	0	0	0	0	0	0	0	0	0	0	0	0	0	0	0	0	0	0	0	0	0	0
Gm37273	0	0	0	0	0	0	0	0	0	0	0	0	0	0	0	0	0	0	0	0	0	0	0	0	0	0	0	0	0	0	0	0	0	0	0	0	0	0	0	0	0	0	0	0	0	0	0	0	0
Mroh9	0	0	0	0	0	0	0	0	0	0	0	0	0	0	0	0	0	0	0	0	0	0	0	0	0	0	0	0	0	0	0	0	0	0	0	0	0	0	0	0	0	0	0	0	0	0	0	0	0
Prrx1	0.118131	0.0135438	0.00876905	0.0113219	0.000776338	0.00643074	0.00156122	0	0	0.00938983	0.0235888	0.00548232	0.00400758	0.00525932	0.00196063	0.00618436	0.00417223	0	0	0.00351319	0.00613964	0	0	0.00139791	0.00232689	0	0.00353434	0.00362745	0	0.00263208	0	0	0	0	0.00384595	0	0.00550547	0.00447389	0.00343067	0	0.00323602	0.00639447	0.0170917	0	0	0.00376324	0.00424872	0	0
Gm20471	0	0	0	0	0	0	0	0	0	0	0	0	0	0	0	0	0	0	0	0	0	0	0	0	0	0	0	0	0	0	0	0	0	0	0	0	0	0	0	0	0	0	0	0	0	0	0	0	0
Gm26523	0.0166156	0.00652917	0	0	0	0	0	0	0	0	0	0	0	0	0	0	0	0	0	0	0	0	0	0	0	0	0	0	0	0	0	0	0	0	0	0	0.0037548	0	0	0	0	0	0	0	0	0	0	0	0
Gorab	0.161621	0.0802337	0.102327	0.0989384	0.125042	0.111949	0.113465	0.0873024	0.0466847	0.136712	0.0920043	0.0701351	0.0905094	0.109521	0.105775	0.111775	0.11425	0.0846281	0.111128	0.179548	0.141375	0.142311	0.119489	0.116093	0.172867	0.151764	0.113417	0.108261	0.105832	0.130215	0.821895	0.124533	0.0993217	0.0831387	0.115246	0.0900714	0.0945093	0.0944519	0.138222	0.12775	0.14208	0.143204	0.154944	0.0967904	0.154038	0.125791	0.133909	0.159197	0.107058
Gm29500	0	0	0	0	0	0	0	0	0	0	0	0	0	0	0	0	0	0	0	0	0	0	0	0	0	0	0	0	0	0	0	0	0	0	0	0	0	0	0	0	0	0	0	0	0	0	0	0	0
Mettl11b	0	0	0	0	0.000664	0	0	0	0	0	0	0	0	0	0.00262613	0	0	0	0	0	0	0	0.00158209	0	0.000919477	0	0	0.000974255	0.00083291	0	0	0	0	0	0	0	0	0	0	0	0	0	0	0	0	0	0	0	0
Kifap3	0.487382	0.474082	0.528758	0.495694	0.669695	0.258202	0.369435	0.315857	0.341855	0.372232	0.257877	0.44482	0.514968	0.516968	0.664803	0.278237	0.270239	0.356413	0.312255	0.277495	0.23322	0.326404	0.395039	0.272897	0.376986	0.230906	0.395718	0.487973	0.410824	0.378345	0.821895	0.588258	0.63858	0.579666	0.551748	0.221418	0.396653	0.466301	0.448742	0.441539	0.273089	0.29539	0.363814	0.237756	0.323088	0.264846	0.346852	0.273508	0.269348
Scyl3	0.159324	0.0342233	0.0845175	0.103583	0.123276	0.113906	0.112219	0.0989818	0.105265	0.110344	0.0968406	0.0821294	0.0804441	0.0902589	0.131262	0.0994084	0.0911626	0.1142	0.125885	0.144505	0.0598047	0.0738681	0.0756126	0.0683366	0.10554	0.073633	0.0748432	0.0806894	0.0961328	0.0890108	0	0.165982	0.100559	0.11049	0.185667	0.116099	0.139609	0.0595079	0.0887299	0.139319	0.124082	0.1075	0.202785	0.115273	0.164647	0.0803333	0.115369	0.104103	0.0938968
BC055324	0.097709	0.0343594	0.0411339	0.0278056	0.0348899	0.0526531	0.0661901	0.073045	0.057234	0.0741694	0.0434248	0.0845003	0.0398818	0.0520816	0.0300099	0.0599579	0.0597618	0.0433597	0.0424483	0.0949108	0.153771	0.13729	0.137541	0.106698	0.115579	0.212673	0.169963	0.144315	0.13009	0.165989	0	0.0509954	0.0195791	0.0360444	0.0395137	0.0528513	0.0845422	0.0536085	0.0227408	0.0522082	0.0675733	0.0496133	0.0664649	0.0707322	0.0794853	0.0990903	0.0783682	0.123471	0.142263
Mettl18	0.0355503	0.0296579	0.0298767	0.0185053	0.0391092	0.044735	0.0340826	0.0470791	0.0398662	0.0175818	0.03603	0.0365375	0.0245573	0.0120495	0.0340975	0.037068	0.0339454	0.0237587	0.0215818	0.061711	0.0391459	0.0429799	0.0339601	0.0338244	0.0471366	0.0541799	0.0222544	0.0296921	0.03254	0.0413579	0	0	0.0153629	0.0232029	0.0239384	0.0129431	0.0262916	0.0233028	0.0205865	0.0256465	0.0495456	0.0343973	0.0394563	0.0391785	0.0633925	0.0427409	0.0600035	0.0328914	0.00627861
Sele	0	0	0.000970042	0.00240069	0.000596477	0	0	0	0	0	0	0	0.00499194	0.00739224	0.0016959	0	0	0	0	0	0	0	0	0	0	0	0	0	0	0	0	0	0.00468619	0	0.00166663	0	0	0	0.00541642	0.00215784	0	0	0	0	0	0.00699278	0	0	0
Sell	0	0	0	0	0	0	0	0	0	0	0	0	0	0	0	0	0	0	0	0	0	0	0	0	0.000734104	0	0	0	0	0	0	0	0	0	0	0	0	0	0	0	0	0	0	0	0	0	0	0	0
Selp	0	0	0	0	0	0.000890175	0	0.00927142	0	0	0.00437897	0	0.00378355	0	0	0	0	0	0	0	0.00237412	0.00701081	0	0	0.000929374	0	0	0	0.00193136	0	0	0	0	0.00656232	0	0	0	0	0	0	0	0	0	0	0.00264418	0.00786952	0	0	0
Gm16587	0	0	0	0	0	0.00123875	0	0.00311344	0	0.00214722	0.00467961	0	0.0025981	0.00269191	0	0	0.00183004	0	0	0	0	0.00194115	0	0	0	0	0.0029967	0	0	0	0	0	0	0	0	0	0	0	0	0	0	0	0	0	0	0	0	0	0
Gm16548	0.0119574	0.0270806	0.00926387	0.00129713	0.00669721	0.00258909	0.00114527	0.00900981	0.0170249	0	0.00926569	0.0204943	0.017777	0.00312862	0.00619411	0.00274765	0.00403453	0	0	0	0.0106095	0.0025368	0.00577165	0.00483691	0.00303403	0	0.00321388	0.00614004	0.00273607	0.00148241	0	0.269931	0.00889896	0.0135644	0.00248118	0.00927441	0	0.00238796	0.00556681	0	0	0	0	0	0	0	0.00257388	0.0108486	0.00605439
F5	0.0477157	0.139637	0.0298577	0.0181744	0.0104755	0.0194977	0.0247752	0.0271629	0.023637	0.0284218	0.00634673	0.0295007	0.0165221	0.0168315	0.00588327	0.0296456	0.0367623	0.0413241	0.0316873	0.0497422	0.00623072	0.0115404	0.0218019	0.00326766	0.00899538	0.0178394	0.00844892	0.0132119	0.00669049	0.0115927	0	0.0509954	0.0146113	0.00719895	0.0124506	0.0272185	0.0227952	0.00854751	0.00944678	0.00722917	0.0200251	0.0295603	0.00450919	0.0452083	0.014636	0.0152532	0.0181387	0.0239701	0.0151796
Slc19a2	0.224638	0.0729864	0.0747726	0.159804	0.241672	0.149825	0.0655265	0.0790379	0.197696	0.156598	0.195911	0.0903519	0.0496716	0.162985	0.174924	0.204345	0.0472688	0.0761834	0.0866046	0.155011	0.120402	0.058035	0.0478657	0.153127	0.138981	0.134429	0.0566729	0.0575217	0.15988	0.187668	0	0.0806348	0.0490884	0.112618	0.130261	0.0822504	0.02097	0.0419758	0.106568	0.195234	0.17241	0.0652209	0.0169943	0.115342	0.0992281	0.127497	0.0791792	0.0453642	0.135681
Ccdc181	0.207546	0.13471	0.0934761	0.100777	0.105288	0.0712207	0.078452	0.0831552	0.0694802	0.0888676	0.0591879	0.0519765	0.0871999	0.0670016	0.065991	0.0750045	0.122745	0.0847259	0.137047	0.167803	0.0658977	0.0686448	0.0842819	0.0620148	0.0810384	0.124599	0.0546705	0.0803662	0.111674	0.0606251	0	0	0.103325	0.071827	0.0750743	0.114207	0.0494455	0.0738878	0.0579662	0.0880734	0.091894	0.090843	0.102737	0.151801	0.158255	0.10245	0.0775386	0.0507944	0.076238
Blzf1	0.16645	0.12324	0.191411	0.149902	0.195239	0.169812	0.173747	0.259213	0.134033	0.195021	0.217635	0.175182	0.17702	0.166608	0.248308	0.163838	0.14551	0.204215	0.149001	0.277858	0.149777	0.167524	0.209346	0.152629	0.186975	0.163278	0.150603	0.148106	0.132981	0.171053	0	0.304193	0.180595	0.180798	0.270454	0.190977	0.166294	0.17768	0.164126	0.214232	0.178391	0.185966	0.26054	0.188324	0.203306	0.16813	0.145297	0.273836	0.103363
Nme7	0.178333	0.324362	0.154826	0.181815	0.190301	0.23342	0.21093	0.174312	0.205254	0.20234	0.167932	0.159834	0.18899	0.176198	0.170047	0.263769	0.232006	0.294109	0.33437	0.258929	0.204561	0.218086	0.192415	0.200934	0.207538	0.267988	0.202359	0.177455	0.20786	0.181422	0	0.172203	0.184447	0.207695	0.189548	0.166848	0.180062	0.157682	0.201126	0.271427	0.247822	0.264889	0.316026	0.287253	0.258212	0.208525	0.195409	0.192827	0.296456
Atp1b1	1.91413	1.42194	0.644514	0.694568	0.424379	0.386116	0.410282	0.66251	0.309619	0.255855	0.246947	0.395202	0.782296	0.429896	0.417615	0.658403	0.839709	1.45655	0.924186	0.662231	0.360643	0.494655	0.565638	0.391123	0.359469	0.551818	0.433353	0.475076	0.378305	0.280159	0	0.318555	0.896999	0.387426	0.477521	0.220244	0.30457	0.492797	0.400719	0.421568	0.982206	0.833899	1.57908	0.692231	0.55577	0.750723	0.612728	0.702238	0.353548
Gm32391	0	0	0	0.00123562	0	0	0.00214299	0	0	0	0	0	0	0	0	0	0	0	0	0	0.00237843	0	0	0.0016667	0	0	0	0	0	0	0	0	0	0	0	0	0	0	0	0	0	0	0	0	0	0	0	0	0
Gm26685	0	0	0	0	0	0	0	0	0	0	0	0	0	0	0	0	0	0	0	0	0	0	0	0	0	0	0	0	0	0	0	0	0	0	0	0	0	0	0	0	0	0	0	0	0	0	0	0	0
Gm37754	0	0.00776278	0.00105408	0	0	0	0	0	0	0	0	0	0	0	0	0	0	0	0	0	0	0	0	0	0	0	0	0.000881994	0	0	0	0	0	0	0	0	0	0	0	0	0.00178286	0.00342045	0	0	0	0	0	0	0
Gm37853	0	0	0	0	0	0	0	0	0	0	0	0	0	0	0	0	0	0	0	0	0	0	0	0	0	0	0	0	0	0	0	0	0	0	0	0	0	0	0	0	0	0	0	0	0	0	0	0	0
Gm37184	0	0	0	0	0	0	0	0	0	0	0	0	0	0	0	0	0	0	0	0	0	0	0	0	0	0	0	0	0	0	0	0	0	0	0	0	0	0	0	0	0	0	0	0	0	0	0	0	0
Gm36945	0	0	0	0	0	0	0	0	0	0	0	0	0	0	0	0	0	0	0	0	0	0	0	0	0	0	0	0	0	0	0	0	0	0	0	0	0	0	0	0	0	0	0	0	0	0	0	0	0
Dpt	0	0	0.00114406	0.000976724	0.0034913	0.00416296	0.00108533	0.00275279	0	0.00142038	0.00365451	0	0	0	0	0.00156012	0	0.00441898	0	0	0	0.00138452	0.000927488	0.00154639	0	0.00272599	0.00332094	0.00113271	0	0	0	0	0.0011096	0	0	0	0	0	0	0	0.00364586	0	0	0	0	0.00164505	0	0	0
Gm32569	0	0	0	0	0	0	0	0	0	0	0	0	0	0	0	0	0	0	0	0	0	0	0.00109015	0.00169303	0	0	0	0	0	0	0	0	0	0	0	0	0	0	0	0	0	0	0	0	0	0	0	0	0
Xcl1	0	0	0	0	0	0	0	0	0	0	0	0	0	0	0	0	0	0	0	0	0	0	0	0	0	0.00240693	0	0.000745943	0	0	0	0	0	0	0	0	0	0	0	0	0	0	0	0	0	0	0	0	0
1700029M03Rik	0	0	0	0	0	0	0	0	0	0	0	0	0	0	0	0	0	0	0	0	0	0	0	0	0	0	0	0	0	0	0	0	0	0	0	0	0	0	0	0	0	0	0	0	0	0	0	0	0
4930568G15Rik	0	0	0	0	0	0	0	0	0	0	0	0	0	0	0	0	0	0	0	0	0	0	0	0	0	0	0	0	0	0	0	0	0	0	0	0	0	0	0	0	0	0	0	0	0	0	0	0	0
Tbx19	0	0	0	0	0	0	0	0	0	0	0	0	0	0	0	0	0	0	0	0	0	0	0.00181541	0	0	0	0	0	0	0	0	0	0	0	0	0	0	0	0	0	0	0	0	0	0	0	0	0	0
Sft2d2	0.164931	0.194667	0.203438	0.228245	0.2766	0.153704	0.145984	0.145387	0.252084	0.295421	0.152737	0.112033	0.172632	0.124768	0.25577	0.171	0.18479	0.257564	0.166743	0.288788	0.101972	0.119569	0.130121	0.146601	0.174447	0.13585	0.0746665	0.108677	0.141288	0.166331	0.821895	0.304686	0.263397	0.244661	0.366415	0.126172	0.0630155	0.14043	0.173382	0.183858	0.167228	0.157946	0.178161	0.178766	0.236177	0.140951	0.128665	0.198436	0.199361
Tiprl	0.511525	0.419364	0.366477	0.55287	0.605522	0.55255	0.462203	0.412143	0.597089	0.617955	0.515948	0.41443	0.36297	0.501294	0.519623	0.572558	0.452282	0.411639	0.634708	0.68038	0.491792	0.44721	0.352432	0.478852	0.507243	0.743703	0.485044	0.502133	0.631365	0.622296	0	0.3451	0.370721	0.517693	0.574342	0.55911	0.400889	0.384843	0.553691	0.54047	0.536679	0.436908	0.476146	0.4517	0.617168	0.52726	0.440466	0.362305	0.709559
Gpr161	0.0296276	0.00593149	0.0359366	0.0436938	0.0226888	0.0316192	0.0175987	0.0187466	0.00861233	0.022962	0.0318465	0.0173189	0.015651	0.0265307	0.0247446	0.0308314	0.0115604	0.0153361	0.020142	0.00854731	0.0321856	0.0173277	0.00717537	0.0189382	0.0387041	0.0374971	0.00752296	0.0140486	0.0172737	0.0214302	0	0	0.0215289	0.0312583	0.0540967	0.0160795	0.00885216	0.0123914	0.00855561	0.0279139	0.0264579	0.0109306	0.0173735	0.0264441	0.014072	0.0259888	0.0276927	0.0176241	0.00598441
Dcaf6	0.160214	0.175836	0.14349	0.171484	0.185283	0.165437	0.126604	0.200713	0.156614	0.131662	0.173299	0.166563	0.153719	0.173897	0.184204	0.153826	0.174229	0.238326	0.134722	0.153599	0.122485	0.116546	0.124721	0.102615	0.107798	0.0971568	0.140819	0.13576	0.101239	0.109639	0.821895	0.0786262	0.231223	0.198372	0.268867	0.112061	0.079063	0.0894942	0.191643	0.172235	0.145645	0.162908	0.19778	0.103293	0.109091	0.158352	0.138917	0.100731	0.15767
Mpc2	1.01839	0.710105	0.886199	1.18358	1.22842	0.875178	0.719144	0.827253	1.03476	0.968793	0.849845	0.683265	0.6661	0.858769	0.950018	1.02935	0.839322	0.840379	1.0502	1.07234	0.857244	0.880154	0.910211	1.14275	1.09448	0.927949	0.942258	0.770015	1.03989	1.09196	0	0.261716	0.761494	0.991762	0.949687	1.04151	0.762193	0.823447	1.22268	1.17864	1.00702	0.862423	0.749544	1.14829	1.06413	0.849283	0.935557	0.848245	0.907874
Adcy10	0	0	0	0	0.00383979	0	0.00102171	0.00308722	0	0	0	0	0	0	0	0	0	0.00446329	0	0	0	0.00381513	0.00497749	0	0	0.00249154	0	0.00103229	0	0	0	0	0	0	0	0	0	0	0.00241415	0	0.00323746	0.00326928	0	0	0.00436823	0	0.00356539	0.00563793	0
Gm38325	0	0	0	0	0	0	0	0	0	0	0	0	0	0	0	0	0	0	0	0	0	0	0	0	0	0	0	0	0	0	0	0	0	0	0	0	0	0	0	0	0	0	0	0	0	0	0	0	0
Mpzl1	0.828536	0.50846	0.545802	0.567127	0.589168	0.650087	0.612268	0.701296	0.668432	0.73709	0.825482	0.556682	0.544642	0.512706	0.66896	0.73495	0.612999	0.713896	0.710598	0.871566	0.73497	0.535601	0.561855	0.555733	0.667872	0.854657	0.590534	0.538863	0.64213	0.686709	0.821895	0.922243	0.696215	0.638787	0.663464	0.813986	0.708175	0.491681	0.661626	0.473519	0.691779	0.673539	0.703201	0.640405	0.858176	0.683363	0.609815	0.706848	0.665561
Rcsd1	0	0	0.00879918	0.0101697	0.0199288	0.00559338	0.0023231	0.00347747	0.00812253	0.00289954	0.0127134	0.00749848	0.00662956	0.0045293	0.00713906	0.0165314	0.00488693	0.0235088	0.0137212	0.0116809	0.00238403	0.00905257	0.0079972	0.00203018	0.0192997	0.00180825	0.00621871	0.00677219	0.0105616	0.0159542	0	0	0.00804988	0.0178991	0.00951065	0	0	0.00313097	0.0205372	0.0057589	0.0129766	0.00206674	0.0285132	0.0103613	0.00902057	0.0110122	0.00749156	0.00856326	0.00633292
Gm37073	0	0	0	0	0	0	0	0	0	0	0	0	0	0	0	0	0	0	0	0	0	0	0	0	0	0	0	0	0	0	0	0	0	0	0	0	0	0	0	0	0	0	0	0	0	0	0	0	0
Creg1	1.44656	1.72009	1.59968	2.25691	2.1625	1.34264	1.54452	1.81499	1.95436	2.00928	1.22509	1.489	1.54515	1.83015	1.72009	1.63299	1.76021	2.16378	2.21987	1.97481	1.39532	1.45794	1.65236	1.78618	1.73217	1.69504	1.26377	1.68652	1.85695	1.65684	0.821895	1.24278	1.22737	1.44355	1.45078	1.25627	1.0557	1.96253	2.11999	1.83835	1.6976	1.71464	1.92857	2.02079	1.76152	1.54778	1.68702	1.65889	1.93295
Gm36972	0	0	0	0	0	0	0	0	0	0	0	0	0	0.00127323	0	0	0	0	0	0	0	0	0	0	0	0	0	0	0	0	0	0	0	0	0	0	0	0	0	0	0	0	0	0	0	0	0	0	0
Cd247	0	0.0189902	0.00729845	0.0136522	0.00664751	0.00138869	0	0.00369107	0	0.00113486	0	0.00563073	0.00585822	0.00260941	0.00146123	0.000917808	0.00519342	0.00491798	0.0194247	0	0.00246665	0	0.00798985	0	0	0	0	0.00168182	0.00787903	0.0105381	0	0	0.0145844	0.0107967	0.00190058	0	0	0.000842856	0	0	0.00142472	0	0	0.00522267	0	0	0	0	0
Gm37469	0	0	0	0	0	0	0	0	0	0	0	0	0	0	0	0	0	0	0	0	0	0	0	0	0	0	0	0	0.00122925	0	0	0	0	0	0	0	0	0	0.00260092	0	0	0	0	0	0	0	0	0	0
Pou2f1	0.223291	0.205015	0.21817	0.293477	0.230069	0.236898	0.223921	0.257786	0.27049	0.215861	0.256289	0.258829	0.212765	0.226347	0.185018	0.222575	0.247659	0.23857	0.262476	0.401807	0.17271	0.191766	0.203893	0.222233	0.189875	0.411744	0.258579	0.395141	0.376287	0.381545	0	0.066306	0.274701	0.308395	0.292685	0.156581	0.266549	0.205319	0.235232	0.197637	0.199465	0.230616	0.168334	0.252147	0.306936	0.204628	0.182768	0.268246	0.138112
Gm26665	0	0	0	0	0	0	0	0	0	0	0	0	0	0	0	0	0	0	0	0	0	0	0	0	0	0	0	0.00204783	0	0	0	0	0.00128522	0	0	0	0	0	0	0	0	0	0	0	0	0	0	0	0
Gm37923	0	0	0	0	0	0	0	0	0	0	0	0	0	0	0	0	0	0	0	0	0	0	0	0	0	0	0	0	0	0	0	0	0	0	0	0	0	0	0	0	0	0	0	0	0	0	0	0	0
Dusp27	0	0	0.00109392	0.00129415	0.000300744	0	0.00244649	0	0	0	0	0	0	0	0	0	0	0	0	0	0.00157008	0	0.00101532	0.00128115	0	0	0.0010452	0	0.00150997	0	0	0	0	0	0	0	0.00540195	0	0	0	0.00536114	0	0	0	0	0.00159091	0.00246314	0	0
Gpa33	0	0	0	0.000873077	0.00121233	0	0	0	0	0	0	0	0	0	0	0	0	0	0	0	0	0.000959534	0.00107494	0	0.000667428	0	0.00215167	0.000745866	0	0	0	0	0	0	0	0	0	0.0028531	0	0	0	0	0	0	0	0	0	0	0
Mael	0	0	0	0	0	0	0	0	0	0	0	0	0	0	0	0	0	0	0	0	0	0	0	0	0	0	0	0	0	0	0	0	0	0	0	0	0	0	0	0	0	0	0	0	0	0	0	0	0
Ildr2	0.226849	0.340744	0.0719282	0.160384	0.174511	0.00785742	0.0108142	0.0239971	0.0457246	0.0149739	0.00812507	0.00801803	0.00735723	0.0158903	0.00388726	0.0387814	0.0622766	0.231135	0.162496	0.0724132	0.00967842	0.0212838	0.00886084	0.0159406	0.00715326	0.00900137	0.00561081	0.0226474	0.0133949	0.0128542	0	0.137529	0.0322534	0.0516053	0.058985	0	0.0037548	0.0074704	0	0.0156799	0.00377137	0.0274939	0.0492794	0.0676999	0.0134376	0.0414983	0.0358951	0.0381114	0.0320387
5330438I03Rik	0	0.00920566	0.00112639	0	0.00153843	0	0	0	0	0	0	0	0	0	0	0	0	0.00571685	0.0062788	0	0	0	0	0	0	0	0	0	0	0	0	0	0	0	0	0	0	0	0	0	0	0	0	0	0	0	0	0	0
Gm15853	0	0	0.00699542	0.00766128	0.00520453	0.00233399	0.00189553	0	0	0	0.00264295	0	0.00193149	0.00185467	0.00281933	0.00123125	0.00295301	0.00853708	0	0	0	0	0.00239869	0	0.000955056	0	0.00175654	0.00390023	0	0	0	0	0.00153741	0	0.0053408	0	0	0.00241548	0	0	0.00162283	0	0	0	0	0	0.00286539	0	0
Tada1	0.247597	0.166269	0.204803	0.19139	0.189216	0.165311	0.186985	0.178437	0.192005	0.172638	0.171887	0.141317	0.168685	0.113542	0.149361	0.17647	0.1908	0.147738	0.148547	0.145223	0.190151	0.150482	0.225156	0.148491	0.212134	0.216382	0.207079	0.195676	0.170618	0.196044	0	0.0935769	0.193272	0.143414	0.171037	0.110693	0.182887	0.217977	0.144922	0.139893	0.185684	0.149291	0.199244	0.190627	0.188336	0.223217	0.164288	0.236236	0.13033
Pogk	0.240367	0.398804	0.260971	0.342171	0.418258	0.312883	0.347623	0.37186	0.404349	0.371826	0.242851	0.373115	0.273782	0.260318	0.366742	0.264303	0.39254	0.427953	0.396633	0.406488	0.270298	0.231104	0.205704	0.19629	0.264954	0.17462	0.142243	0.214559	0.183596	0.224105	0	0.346138	0.37201	0.372055	0.486743	0.224032	0.260913	0.149999	0.160706	0.255572	0.23217	0.385945	0.402742	0.28425	0.353597	0.265174	0.258927	0.301921	0.3173
Gm4846	0	0	0	0	0	0	0	0	0	0	0	0	0	0	0	0	0	0	0	0	0	0	0	0	0	0	0	0	0	0	0	0	0	0	0	0	0	0	0	0	0	0	0	0	0	0	0	0	0
Gm4847	0	0	0	0	0	0	0	0	0	0	0	0	0	0	0	0	0	0	0	0	0	0	0	0	0	0	0	0	0	0	0	0	0	0	0	0	0	0	0	0	0	0	0	0	0	0	0	0	0
Fmo9	0	0	0	0	0	0	0	0	0	0	0	0	0	0	0	0	0	0	0	0	0	0	0	0	0	0	0	0	0	0	0	0	0	0	0	0	0	0	0	0	0	0	0	0	0	0	0	0	0
Gm16701	0	0	0.00045992	0	0.00294474	0	0	0	0	0	0	0	0	0	0	0	0	0	0	0	0	0	0	0	0.00107925	0	0	0	0	0.000872574	0	0	0	0	0	0	0	0	0	0	0.00255466	0	0	0	0	0	0	0	0
Gm16701.1	0	0	0.00114615	0	0.0023495	0.000607516	0	0	0	0	0	0	0	0.00357688	0.00301156	0.00166574	0.00165482	0.003739	0	0	0	0	0.00291652	0	0	0	0	0	0	0	0	0	0.00282276	0	0.00267421	0	0	0	0	0	0.00143642	0.0026272	0	0	0	0.00135101	0.00362348	0	0.00705082
Fam78b	0.0280572	0.014963	0.0269136	0.0163322	0.0153848	0.00485663	0.0118448	0.0272114	0.00780263	0.0116193	0.00321764	0.00571472	0.0191889	0.00753158	0.00504304	0.0086441	0.0083298	0.00489227	0.0110582	0.0049625	0.00733025	0.0237122	0.0141691	0.0051784	0.0181138	0.00341862	0.00768752	0.00696041	0.0103048	0.00978709	0	0	0.0102047	0.00952944	0.0109325	0.0206322	0.0219985	0.0272472	0.00955951	0.0177355	0.0124562	0.0108863	0.00723334	0.00545279	0	0.0105189	0.00148708	0.00475748	0.00400009
Uck2	0.0771705	0.1962	0.216162	0.164637	0.245138	0.269747	0.303326	0.347887	0.310518	0.330441	0.272012	0.373157	0.375142	0.324825	0.292198	0.226315	0.189209	0.166065	0.152295	0.185825	0.402816	0.451149	0.45968	0.464081	0.437643	0.331504	0.444028	0.388268	0.345759	0.327862	0.821895	0.984015	0.195103	0.199451	0.210804	0.404462	0.48276	0.381787	0.398934	0.399991	0.282553	0.267622	0.274527	0.282832	0.225883	0.365814	0.380581	0.394389	0.279981
Gm37982	0	0	0	0.000748824	0	0	0	0	0.00486559	0	0	0	0	0	0	0	0	0	0	0	0	0.0038415	0.00118445	0	0	0	0	0	0	0	0	0	0	0	0	0	0	0	0	0	0	0	0	0	0	0	0	0	0
Gm2453	0	0	0.000641483	0	0.000433353	0	0	0	0	0	0	0	0	0	0	0	0	0	0	0	0	0	0	0.00410897	0	0	0	0.00106113	0	0.00132864	0	0	0.00200095	0	0	0	0.0054366	0	0	0	0	0	0	0	0	0	0	0	0
Tmco1	0.735567	0.750591	0.737469	0.750107	0.76546	0.55824	0.606053	0.647847	0.493327	0.733391	0.588638	0.592513	0.666949	0.591855	0.662365	0.593093	0.559266	0.628012	0.434214	0.703101	0.875577	0.862947	0.861432	0.813542	0.8794	0.638175	0.623945	0.673375	0.634754	0.687773	1.64379	0.823025	0.508524	0.539077	0.660709	0.513003	0.681558	0.911936	0.742584	0.887306	0.709902	0.631534	0.543661	0.554498	0.614988	0.767117	0.68966	0.655153	0.608912
Aldh9a1	0.51097	0.242801	0.256401	0.318165	0.338663	0.481887	0.357284	0.345552	0.398102	0.408688	0.557244	0.338076	0.259325	0.401691	0.354388	0.555446	0.39383	0.374771	0.371388	0.373134	0.526697	0.374628	0.38802	0.427044	0.429259	0.529884	0.383228	0.273793	0.341385	0.30568	0.821895	0.374644	0.199434	0.247217	0.274843	0.501129	0.433993	0.336316	0.382244	0.355855	0.556831	0.320169	0.416031	0.480836	0.43955	0.586199	0.369554	0.470047	0.365156
Mgst3	0.774905	0.334111	0.176541	0.522134	0.668494	0.53429	0.198949	0.226762	0.574189	0.603331	0.449359	0.322556	0.401306	0.845665	1.11298	0.726408	0.248975	0.277393	0.817688	0.661031	0.532647	0.379902	0.411684	1.14369	0.930991	0.548299	0.235773	0.316897	0.773343	0.773398	0.821895	0.119848	0.238539	0.580984	0.792584	0.379843	0.280963	0.572174	0.937856	1.25281	0.711635	0.21407	0.274529	0.537319	0.655824	0.646827	0.256155	0.237615	0.657427
Lrrc52	0	0	0	0	0	0	0	0	0	0	0	0	0	0	0	0	0	0	0	0	0	0	0	0	0	0	0	0	0	0	0	0	0	0	0	0	0	0	0	0	0	0	0	0	0	0	0	0	0
Rxrg	0	0	0	0	0	0	0	0	0	0	0	0	0.00102091	0	0	0	0	0	0	0.00329322	0	0	0	0	0	0	0	0	0	0	0	0	0.00141359	0	0	0	0	0	0	0	0	0	0	0	0	0	0	0	0
Lmx1a	0	0	0	0	0	0	0	0	0	0	0	0	0.00141326	0	0	0	0	0	0	0	0	0	0	0	0	0	0	0	0	0	0	0	0	0	0	0	0	0	0	0	0	0	0	0	0	0	0	0	0
Gm20711	0	0	0	0	0	0	0	0	0	0	0	0	0.000803796	0	0	0	0	0	0	0	0	0	0	0	0	0	0	0.00116691	0	0	0	0	0	0	0	0	0	0	0	0	0	0	0	0	0	0	0	0	0
Pbx1	2.19407	1.85921	1.42502	2.79129	2.3969	1.14988	0.862148	0.864485	1.15041	0.935447	1.21702	0.721564	0.728867	1.04991	0.897261	1.25633	1.33097	1.38476	1.74349	1.545	0.710355	0.585767	0.537389	0.665053	0.650589	0.885242	0.596646	0.814041	0.897088	0.770087	1.64379	1.51889	1.21428	2.23355	2.01113	0.774289	0.392642	0.608793	0.735676	0.632859	1.07104	0.876273	1.10227	1.08415	0.982046	0.795981	0.665259	0.794922	0.758248
Gm37839	0	0	0	0	0	0	0	0	0	0	0	0	0	0	0	0	0	0	0	0	0	0	0	0	0	0	0	0	0	0	0	0	0	0	0	0	0	0	0	0	0	0	0	0	0	0	0	0	0
Nuf2	0	0	0.00401845	0.00142227	0.00212312	0.00825074	0.00778218	0.00189785	0	0.00711972	0	0	0.00435453	0.00187876	0.00415849	0.00400094	0.00414311	0.00572941	0	0.00345939	0.0544278	0.0312171	0.0371818	0.0331978	0.0348536	0.837723	0.495943	0.493632	0.525326	0.563958	0	0	0.00484185	0	0.00528707	0	0.00941304	0.0267076	0.0157353	0.0317749	0.00540253	0.00598864	0.00758555	0	0.00277471	0.00365916	0.00212321	0.0037068	0.0127141
Rgs5	0.0149149	0	0.00276644	0.00770501	0.0173427	0.00190059	0.00503448	0.0020355	0	0.0142977	0.0341202	0.00816378	0.00113719	0.00505327	0.00431362	0.0119018	0.00132337	0.00316891	0	0.00250804	0.0108901	0	0.000936382	0	0.00740726	0.00940922	0	0.00196257	0.000872583	0.0029394	0	0	0	0.00658269	0.0117045	0.00749209	0	0.00234759	0	0.0052112	0.00125305	0	0	0.00821916	0.0145429	0.00523021	0.00197839	0.0037068	0
Rgs4	0	0	0.00278236	0	0.00453944	0.00380452	0.00379174	0	0	0.00170918	0	0	0.00341118	0.00223504	0.00164388	0.00098871	0	0	0	0	0.00160496	0.00840756	0	0	0.00243069	0.00449068	0.00847985	0	0.00186802	0.00253609	0	0	0.0131502	0.00470374	0	0.00890754	0.00521544	0.00131271	0	0	0.00188559	0.00672376	0.0181902	0	0	0.00486887	0.0103794	0	0
Ccdc190	0	0	0.000751227	0.00129713	0.00356923	0	0	0	0	0	0	0	0.00777585	0	0.00372243	0	0	0	0	0	0	0	0.00191644	0	0	0	0	0.000852838	0	0	0	0.063991	0.00429651	0.00417589	0.00333474	0	0	0	0	0	0	0	0	0	0	0	0	0	0
Hsd17b7	0.68159	0.678295	0.473811	0.350071	0.510129	0.337503	0.393723	0.241624	0.297626	0.241516	0.377335	0.323474	0.277912	0.172259	0.196659	0.354492	0.696971	0.44016	0.738268	0.805921	0.268412	0.231013	0.123843	0.191184	0.171579	0.180957	0.0914987	0.108174	0.104492	0.111564	0.821895	0.940908	0.744822	0.74673	0.893267	0.138823	0.0476419	0.0671125	0.0971307	0.10908	0.114246	0.279614	0.211688	0.332458	0.277572	0.203715	0.328711	0.174372	0.196037
3110045C21Rik	0.00893272	0.00660759	0.0106699	0.0103903	0.0221712	0.00661303	0.00274778	0.00744271	0	0.0044891	0.00159304	0.00493659	0.010541	0.00141184	0.021752	0.00126316	0.00582076	0.0107923	0.0115793	0.00872327	0.0115861	0.00337905	0.00508004	0.00751615	0.0132779	0.0173546	0.0132333	0.0107263	0.0182017	0.0121466	0	0	0.0204621	0.0245688	0.0358988	0	0	0.016718	0.00699817	0.00703956	0.00884665	0.00394952	0	0.00628806	0.0242195	0.00899388	0.00647603	0	0.0190788
Ddr2	0.13109	0.104068	0.0734669	0.0483704	0.0641208	0.0208847	0.0186227	0.0309158	0.0409806	0.0292337	0.0181394	0.0362346	0.0149083	0.0173106	0.0329401	0.0231442	0.036623	0.049663	0.0494845	0.052425	0.0215469	0.00892116	0.0146217	0.0159025	0.0188149	0.00787126	0.0428991	0.0139071	0.0211379	0.0312582	0	0	0.0434389	0.0500827	0.0916836	0	0.00546606	0.0100975	0.00975023	0.00861989	0.0165832	0.00633663	0.0206775	0.00555506	0.0034859	0.00559248	0.0129657	0.0104973	0.0259483
Uap1	0.405921	0.347059	0.172397	0.241996	0.242485	0.183716	0.209348	0.189428	0.234146	0.205662	0.273049	0.1991	0.155472	0.244952	0.2412	0.184238	0.176477	0.181101	0.226374	0.257652	0.252418	0.235312	0.239413	0.281406	0.357464	0.224475	0.143398	0.175081	0.246491	0.285047	0	0.100273	0.210105	0.205643	0.266716	0.26613	0.199012	0.190514	0.269565	0.322885	0.174809	0.170365	0.157343	0.189601	0.197112	0.220343	0.173063	0.172159	0.236912
Gm37748	0	0	0	0.0014782	0.000843042	0.0032012	0	0.00337502	0.00622518	0	0.00797161	0	0	0	0	0	0.0037526	0	0	0	0.00218764	0.00127578	0.00272559	0.002198	0.000708633	0	0	0	0.00418345	0.00374402	0	0	0.0019956	0.00714362	0.000679351	0	0.00527452	0	0.00581612	0	0	0	0	0	0	0.00486307	0	0	0
Gm37502	0	0	0.000701684	0	0	0	0	0	0	0	0	0	0	0	0	0	0	0	0	0	0	0	0	0	0	0	0	0	0	0	0	0	0.00182284	0	0.00223068	0	0	0.00253065	0	0	0	0	0	0	0	0	0	0	0
Uhmk1	0.106478	0.102416	0.180967	0.160055	0.186702	0.121527	0.229423	0.159536	0.131449	0.167185	0.0892524	0.165583	0.129206	0.122684	0.143975	0.108961	0.166594	0.197431	0.114093	0.15511	0.117252	0.118946	0.11621	0.131709	0.138961	0.118073	0.120696	0.143584	0.139233	0.132763	0	0.117301	0.162653	0.204966	0.152719	0.0641416	0.0872125	0.149808	0.10793	0.126031	0.113654	0.175535	0.226134	0.147585	0.167384	0.151002	0.187321	0.157047	0.131236
4930500M09Rik	0	0.00536927	0.000781726	0.00121666	0	0.0010041	0.00115878	0	0	0	0	0.00214225	0.00117059	0.00349373	0	0.00446561	0	0.00333361	0	0	0.00172901	0.00163257	0.00109767	0.00421133	0	0	0	0.00106186	0.00132164	0.00255368	0	0	0.00118351	0.00488283	0	0	0	0.00102541	0	0	0.00163529	0.00361684	0.00684206	0	0	0	0.00222022	0	0
Sh2d1b2	0	0	0	0	0	0	0	0	0	0	0	0	0	0	0	0	0	0	0	0	0	0	0	0	0	0	0	0	0	0	0	0	0	0	0	0	0	0	0	0	0	0	0	0	0	0	0	0	0
Sh2d1b1	0	0	0	0.000894848	0	0	0	0	0	0	0	0	0	0	0	0	0	0	0	0	0.00157492	0	0	0	0	0	0	0	0	0	0	0	0	0	0	0	0	0	0	0	0	0	0	0	0	0	0	0	0
Gm7694	0.0554902	0.0309381	0.0335822	0.0488345	0.0594033	0.0479259	0.0295125	0.0373997	0.0440075	0.0355429	0.0184917	0.0326668	0.0309375	0.0394606	0.0366578	0.0439122	0.0217349	0.0366471	0.0329155	0.0277341	0.0398615	0.0115694	0.0404319	0.0232157	0.0344124	0.0298919	0.0107981	0.0386189	0.0132167	0.0413932	0	0.214188	0.0141658	0.0632348	0.0551068	0.0179708	0.0301112	0.0172713	0.0221632	0.0344777	0.0358629	0.00286824	0.0490305	0.0474531	0.0212943	0.0251765	0.00886094	0.0250392	0.0265367
Nos1ap	0.337517	0.534088	0.265516	0.200499	0.178104	0.1354	0.331934	0.343281	0.232381	0.155628	0.192299	0.330326	0.247931	0.214573	0.162363	0.167515	0.30605	0.271029	0.20963	0.182723	0.127062	0.134802	0.178943	0.123979	0.10238	0.0747328	0.114798	0.21428	0.0841754	0.0905377	0	0.922892	0.238454	0.219763	0.173909	0.104676	0.121454	0.242608	0.12565	0.0960565	0.10745	0.258776	0.219935	0.111548	0.107213	0.12193	0.154356	0.235493	0.123751
Spata46	0	0	0.000794041	0	0	0	0.00125674	0	0	0	0.00316716	0	0	0	0.0031493	0	0.00113372	0	0	0	0	0	0	0	0	0	0	0	0	0	0	0	0.00203291	0.00416694	0	0	0	0	0.00235716	0	0	0	0	0	0	0	0	0	0
Olfml2b	0.196021	0.0833861	0.0348617	0.0892043	0.093248	0.0299242	0.00242363	0.00970965	0.0169688	0.00931892	0.0067699	0.00472976	0.00514941	0.00949865	0.0276268	0.0419247	0.0122151	0.0192022	0.0213311	0.0374549	0.0133245	0.00256718	0.00882655	0.00560151	0.0097434	0.0331957	0.00140588	0.00919557	0.0281667	0.0262386	0	0	0.0244927	0.0678561	0.0630645	0	0	0.00587051	0.0118347	0.0143119	0.0278473	0.00638555	0	0.0067347	0.0094461	0.0112783	0.00739048	0.00331646	0.00785774
Atf6	0.210942	0.241372	0.286333	0.388753	0.330011	0.228838	0.314289	0.26329	0.259616	0.189902	0.28295	0.275362	0.272843	0.318463	0.263402	0.215026	0.240213	0.273658	0.220333	0.230473	0.158388	0.247879	0.30698	0.282853	0.230812	0.161064	0.226458	0.255454	0.281394	0.221483	0.821895	0.28469	0.269968	0.287679	0.308814	0.167262	0.248247	0.259438	0.244079	0.209658	0.205241	0.238846	0.225395	0.292095	0.209047	0.188775	0.265711	0.241308	0.284975
Dusp12	0.23964	0.173517	0.149672	0.205362	0.197461	0.1831	0.182004	0.210978	0.244746	0.243858	0.179352	0.187364	0.218072	0.203648	0.302752	0.16756	0.171048	0.122566	0.143995	0.290622	0.165416	0.217173	0.263864	0.251357	0.257116	0.189163	0.265031	0.256094	0.234165	0.254854	0.821895	0.174212	0.185778	0.20847	0.261581	0.236296	0.261989	0.209187	0.25692	0.271976	0.173327	0.176196	0.269177	0.194761	0.272286	0.189112	0.192876	0.310096	0.265301
Gm26620	0	0	0.0102122	0.011524	0.00870993	0.00739494	0.00631043	0	0.0197648	0.0188682	0.0080448	0.0223594	0.00949513	0.0181188	0.0141672	0.00800228	0.00488623	0.0100334	0	0.0132683	0.00214198	0.00798263	0.0121498	0.0229036	0.0270081	0.00884063	0.00945098	0.0152651	0.0164647	0.0188828	0	0	0.00680602	0.0381308	0.0142863	0.0179937	0.013844	0.0104917	0.0230064	0.00831743	0.00701574	0.00878978	0.00684206	0.00603958	0.00564107	0.00165282	0.0309067	0.0152575	0.0109406
Fcrlb	0	0	0	0	0	0	0	0	0	0	0	0.00176701	0	0.00289884	0	0	0	0.00666722	0	0	0	0	0	0	0	0	0	0.00196117	0	0	0	0	0.00140814	0	0.00231316	0	0	0.00175096	0	0	0	0	0	0	0	0	0	0	0
[truncated: 29,645 more rows]
[truncated: 41 more columns]

## Sheet: gc0_Metascape
Major metascape enriched GO categories (selected) for preferentially expressed genes in granulosa cluster gc0
[truncated: 7 more rows]

[truncated: 2 more sheets: gc6_Metascape, gc11_Metascape]
