# Supplementary material for: Distinct waves of ovarian follicles contribute to mouse oocyte production
Source: eLife. 2025 Oct 7;14:RP107352. doi: 10.7554/eLife.107352 (PMC12503487; doi:10.7554/eLife.107352)
Supplement: Source data 4. — Excel file containing average expression values generated using Seurat. Column A: gene name. Row 3: cluster and sample name (e.g., 0_O2w, where ‘0’ indicates cluster 0 and ‘O2w’ indicates the 2-wk ovary sample). [file elife-107352-data4.xlsx]

## Sheet: Expression_2wk_6wk_Mesenchymal
Source data 4. Re-clustered mesenchymal cell clusters: g0–g20
	0_O2w	0_O3w	0_O4w	0_O5w	0_O6w	1_O2w	1_O3w	1_O4w	1_O5w	1_O6w	2_O2w	2_O3w	2_O4w	2_O5w	2_O6w	3_O2w	3_O3w	3_O4w	3_O5w	3_O6w	4_O2w	4_O3w	4_O4w	4_O5w	4_O6w	5_O2w	5_O3w	5_O4w	5_O5w	5_O6w	6_O2w	6_O3w	6_O4w	6_O5w	6_O6w	7_O2w	7_O3w	7_O4w	7_O5w	7_O6w	8_O2w	8_O3w	8_O4w	8_O5w	8_O6w	9_O2w	9_O3w	9_O4w	9_O5w
Xkr4	0	0.00796276	0	0	0	0.00393683	0.00177825	0	0	0	0.00271491	0	0.00270151	0.00156897	0	0.00224012	0	0	0.00381377	0	0	0	0.0114365	0	0.0046582	0.00383103	0	0.00668186	0	0.00192146	0.0162137	0	0	0	0	0.00461616	0	0	0.00511754	0	0.00359466	0.0147724	0	0.00458391	0	0	0	0.00367096	0.00209145
Gm1992	0	0	0	0	0	0	0	0	0	0	0	0	0	0	0	0	0	0	0	0	0	0	0	0	0	0	0	0	0	0	0	0	0	0	0	0	0	0	0	0	0	0	0	0	0	0	0	0	0
Gm37381	0	0	0	0	0	0	0	0	0	0	0	0	0	0	0	0	0	0	0	0	0	0	0	0	0	0	0	0	0	0	0	0	0	0	0	0	0	0	0	0	0	0	0	0	0	0	0	0	0
Rp1	0	0	0	0	0	0.00313331	0	0	0	0	0	0	0	0	0	0	0	0	0	0	0	0	0	0	0	0	0	0	0	0	0	0	0	0	0	0	0	0	0	0	0	0	0	0	0	0	0	0	0
Sox17	0	0	0	0	0	0	0	0	0	0	0	0.00180963	0	0	0	0	0	0	0	0	0.00376447	0	0	0	0	0	0	0	0	0	0	0	0	0	0	0.00145901	0	0	0	0	0	0	0	0.0029088	0	0	0.00694837	0	0
Gm37323	0	0	0	0	0	0	0	0	0	0	0	0	0	0	0	0	0	0	0	0	0	0	0	0	0.0014342	0.00409504	0	0	0	0	0	0	0	0	0	0	0	0	0	0	0	0	0	0	0	0	0	0	0.000750857
Mrpl15	0.463646	0.465811	0.463748	0.461191	0.610208	0.536058	0.38282	0.365715	0.50532	0.57628	0.638347	0.566404	0.636762	0.547859	0.746958	0.488444	0.387779	0.443429	0.454348	0.65579	0.564262	0.551028	0.548421	0.58219	0.660989	0.549573	0.468222	0.40354	0.450153	0.565282	0.760097	0.690802	0.5763	0.571853	0.751953	0.419612	0.365756	0.445277	0.383058	0.601818	0.617708	0.560355	0.518291	0.639966	0.721184	0.737165	0.529546	0.519986	0.682034
Lypla1	0.200308	0.114356	0.152171	0.18749	0.207314	0.248634	0.112727	0.140193	0.131286	0.215606	0.249292	0.111283	0.158315	0.16263	0.195269	0.240161	0.109829	0.131523	0.0774662	0.213248	0.287182	0.173937	0.14339	0.191061	0.196261	0.265371	0.114365	0.147033	0.180977	0.224679	0.267836	0.151735	0.234852	0.188491	0.231181	0.209123	0.105939	0.0933825	0.0934816	0.207106	0.341677	0.112518	0.119979	0.256655	0.269905	0.317253	0.16408	0.154018	0.317987
Gm37988	0	0.00179157	0	0	0	0	0	0.0029486	0	0	0.00125009	0	0	0.00570843	0	0	0.0204578	0	0.00402405	0	0	0	0.00461093	0.0034882	0.00693745	0	0	0	0	0.00325975	0	0	0	0	0	0	0	0	0.00424895	0	0	0	0	0.00211291	0.00362842	0	0.00465509	0.00538677	0.000767192
Tcea1	1.0796	1.04406	0.687514	1.0697	1.15702	1.08457	0.892081	0.7969	1.03065	1.02557	1.09662	0.967356	0.812708	0.946131	0.917182	1.07945	0.801382	0.702503	0.938322	1.02559	1.12544	1.04738	0.951163	1.00602	0.992119	1.10117	1.0157	0.738003	0.989047	1.13341	1.32258	1.27382	0.832754	1.16621	1.18071	1.17987	0.883769	0.754513	0.922488	0.947755	1.09095	1.06725	0.783911	0.866418	0.882512	1.55671	0.811813	0.742709	0.959077
Rgs20	0	0	0	0.00854954	0	0	0	0	0.0027731	0	0	0	0	0	0	0	0.00296329	0.00338785	0	0	0	0	0	0	0	0.00317266	0.00220881	0	0	0	0	0	0	0	0	0	0	0	0	0.0045287	0	0	0	0	0	0	0	0	0
Gm16041	0	0	0	0	0	0	0	0	0	0	0	0	0	0	0	0	0	0	0	0	0	0	0	0	0	0	0	0	0	0	0	0	0	0	0	0	0	0	0	0	0.00429151	0	0.00395319	0	0	0	0	0	0
Atp6v1h	0.280071	0.168685	0.161726	0.342468	0.267989	0.35577	0.179905	0.207079	0.225089	0.253673	0.214695	0.167438	0.204579	0.231232	0.238123	0.284142	0.223872	0.175707	0.352062	0.249941	0.227254	0.214143	0.268799	0.287822	0.253636	0.322784	0.166173	0.216559	0.268919	0.239636	0.483442	0.114534	0.20746	0.215138	0.204489	0.309795	0.178354	0.153893	0.243717	0.20135	0.339938	0.14999	0.265404	0.298702	0.213086	0.409026	0.304985	0.354574	0.522605
Oprk1	0	0	0	0	0	0	0	0	0	0	0	0	0	0	0	0	0	0	0	0	0	0	0	0	0	0	0	0	0	0	0	0	0	0	0	0	0	0	0	0	0	0	0	0	0	0	0	0	0
Npbwr1	0	0	0	0	0	0	0	0	0	0	0	0	0	0	0	0	0	0	0	0	0	0	0	0	0	0	0	0	0	0	0	0	0	0	0	0	0	0	0	0	0	0	0	0	0	0	0	0	0
Rb1cc1	0.881634	0.753972	0.620997	0.87579	0.890084	0.944043	0.72749	0.73769	0.947963	0.91803	0.665251	0.455204	0.576581	0.718433	0.658268	0.733145	0.537919	0.724613	1.06716	1.07134	0.698492	0.574394	0.684394	0.990456	0.897364	0.653773	0.602225	0.567393	0.789683	0.804452	0.955712	0.886226	0.736617	1.07408	0.901421	0.900216	0.719274	0.672869	1.22166	0.886759	0.915328	0.716099	0.716135	0.860786	0.763195	0.737649	0.767661	1.2335	0.933697
4732440D04Rik	0.130655	0.0611381	0.0611312	0.0777532	0.104961	0.0947747	0.0559528	0.0399965	0.0584744	0.0597372	0.0866078	0.0429168	0.0615321	0.074672	0.0863721	0.0996724	0.0282479	0.0518238	0.106592	0.0686357	0.117248	0.0474473	0.0889637	0.0612134	0.0760967	0.0766289	0.0573794	0.0475989	0.0760279	0.0732762	0.130687	0.0483748	0.206068	0.117311	0.14705	0.112797	0.0607888	0.0448277	0.0977661	0.0502271	0.0382442	0.0464444	0.103262	0.0314474	0.0371313	0.113273	0.106929	0.0982804	0.0566906
Alkal1	0	0	0	0	0	0	0	0	0	0	0	0	0	0	0	0	0	0	0	0	0	0	0	0	0	0.0037963	0	0	0	0	0	0	0	0	0	0	0	0	0	0	0	0	0	0	0	0	0	0	0
St18	0	0	0	0	0	0	0	0	0	0	0	0	0	0	0	0	0	0	0	0	0	0	0	0	0	0	0	0	0	0	0	0	0	0	0	0	0	0	0	0	0	0	0	0	0	0	0	0	0
Pcmtd1	0.696264	0.712827	0.787534	0.974988	0.883692	0.841146	0.853147	1.13905	1.30986	1.16114	0.554076	0.432649	0.516472	0.616523	0.595067	0.847338	0.845768	0.938394	1.05244	0.910679	0.529961	0.402398	0.567104	0.732087	0.575105	0.700894	0.635496	0.744536	0.90082	0.763945	0.799712	0.924551	1.14927	1.08518	0.826456	0.633014	0.573881	0.805534	0.816907	0.77032	1.49701	1.40291	1.25303	1.87308	1.40393	0.498472	0.574171	0.594675	0.618341
Gm26901	0.00605067	0.012517	0	0.00580298	0	0.00557771	0.00297179	0.0021538	0.0072356	0.00232881	0.016136	0.0118385	0	0.00444304	0.00539735	0	0.0124675	0.0107146	0	0.00920852	0.0137153	0.00885907	0.0165959	0.00621656	0.00630432	0.0135042	0.016726	0.00367338	0	0.00970002	0.00417996	0.0162752	0.0325174	0	0.00172005	0.0119548	0.0146214	0	0	0.00386683	0.00492164	0	0.00356761	0	0.0071288	0.0261198	0	0	0.0128538
Gm30414	0	0	0	0	0	0	0	0	0	0	0	0	0	0	0	0	0	0	0	0	0	0	0	0	0	0	0	0	0	0	0	0	0	0	0	0	0	0	0	0	0	0	0	0	0	0	0	0	0
Sntg1	0	0.00498493	0	0	0	0.00251046	0	0	0	0	0	0	0	0	0	0	0	0	0.006027	0.0105127	0	0	0	0	0.0039456	0	0	0	0	0	0	0	0	0	0.00419534	0.00443905	0	0	0.00727722	0.00858443	0.00173324	0	0	0	0	0	0	0	0
Rrs1	0.685201	0.718249	0.685544	1.0189	0.617124	0.606456	0.584341	0.595164	0.870444	0.536877	0.834438	0.766681	0.838103	0.902815	0.710544	0.724573	0.737421	0.839755	1.5215	0.759342	0.730836	0.742649	0.640349	1.04473	0.633624	0.645951	0.698397	0.614028	0.88166	0.679847	0.828306	0.820485	0.873988	1.58821	0.857239	0.7533	0.71384	0.743682	1.1551	0.666284	0.431843	0.350402	0.271783	0.494332	0.290279	1.1048	1.43949	1.46495	2.09533
Adhfe1	0.0097229	0.00600911	0.015051	0.0114281	0.0131603	0.0159838	0.00459963	0.0206577	0.0552953	0.0547704	0.0283129	0.012715	0.0213881	0.0314628	0.0323938	0.0281201	0	0.0403425	0.101197	0.104481	0.0390035	0.0101974	0.0159994	0.0513085	0.026211	0.0271302	0.011257	0.00761709	0.0374601	0.0830802	0.0059161	0.00783745	0.0237614	0.115513	0.0671856	0.0209105	0	0.0152696	0.108298	0.0393984	0.00769303	0.0160155	0.0061339	0.0376052	0.0278594	0.0646273	0.0352276	0.103338	0.275474
3110035E14Rik	0	0	0	0	0	0	0	0	0	0	0	0	0	0	0	0	0	0	0	0	0	0	0	0	0	0	0	0	0	0	0	0	0	0	0	0.00215063	0	0	0	0	0	0	0	0	0	0	0	0	0
Gm29520	0	0	0	0	0	0	0	0	0	0	0	0	0	0	0	0	0	0	0	0	0	0	0	0	0	0	0	0	0	0	0	0	0	0	0	0	0	0	0	0	0	0	0	0	0	0	0	0	0
Mybl1	0.0155083	0.00936289	0.00757721	0.0486599	0.0132879	0.00473256	0.0038194	0.0175047	0.0122357	0.00369373	0.00991463	0.00465207	0.0322247	0.00357066	0.00788145	0.0375693	0.023492	0.0346443	0.0363102	0.024631	0.0225364	0.0167078	0.00542821	0.00754152	0.018226	0.0181955	0.00161713	0.00698171	0.0133836	0.00957728	0.00900033	0.0192077	0	0.00887214	0.0126972	0.0265189	0.0182983	0.00841674	0.00852223	0.0332303	0.0103804	0.00262663	0	0	0.0102246	0	0.00585029	0.0127425	0.0124648
Vcpip1	0.410247	0.351518	0.356475	0.366416	0.254948	0.338163	0.27166	0.290397	0.307506	0.273614	0.304154	0.253123	0.319625	0.285127	0.259977	0.402611	0.273345	0.4002	0.430523	0.361217	0.279659	0.297115	0.281438	0.280784	0.281578	0.306623	0.223513	0.362213	0.282248	0.312673	0.437078	0.393215	0.386063	0.379888	0.287838	0.347621	0.307769	0.403269	0.306644	0.307886	0.235702	0.239421	0.290584	0.262205	0.218709	0.270789	0.298778	0.406966	0.348478
1700034P13Rik	0	0.00212543	0	0	0.00340829	0	0.00322109	0	0	0.000424223	0	0	0	0	0	0	0	0	0	0.00178788	0	0.00154107	0.00176366	0.00186149	0	0	0	0	0	0	0	0	0	0	0	0	0.00567113	0	0.0102381	0	0	0.0119868	0	0	0	0	0	0	0
Sgk3	0.0874289	0.100856	0.0841669	0.115634	0.104808	0.165356	0.0679722	0.0504044	0.0439187	0.0802791	0.127972	0.0427623	0.0400673	0.0539555	0.0600427	0.148217	0.075584	0.0580194	0.143514	0.0704853	0.135075	0.0565905	0.0874022	0.106419	0.100907	0.140146	0.0900651	0.0465052	0.135087	0.0887026	0.255103	0.0341078	0.0771754	0.107674	0.0863654	0.121295	0.0540877	0.0339565	0.0734049	0.0429834	0.156416	0.0845117	0.0289482	0.0576284	0.0648607	0.148896	0.0358052	0.140492	0.134638
Mcmdc2	0.0404253	0.00899385	0.03883	0.0207938	0.00550342	0.0336944	0.0186616	0.0013119	0.00675982	0.00680967	0.0257897	0.00686692	0.00704816	0.010146	0.00570338	0.0267198	0.0104677	0	0.00557961	0.00640432	0.0223201	0.0302285	0.0133703	0.00424063	0.00762589	0.0409704	0.0119681	0	0.00700133	0.00411256	0.0297271	0.0592861	0.0279297	0	0	0.0327963	0.00737161	0	0.0446904	0.00268295	0.00909339	0.0273372	0.00455581	0.00587439	0.00476041	0	0.0112624	0.00368222	0.00367601
Snhg6	0.941581	0.13547	0.151672	0.56422	0.654038	1.02162	0.170501	0.211714	0.630861	0.637055	1.18656	0.222949	0.269927	0.92255	1.18931	0.908098	0.16797	0.223608	0.622437	0.729636	1.24802	0.222665	0.169407	0.691272	0.866372	0.99142	0.13565	0.156426	0.625465	0.734017	1.12938	0.132436	0.204776	0.628306	0.774806	1.13296	0.207398	0.253854	0.734484	0.762133	0.724587	0.138487	0.144545	0.465413	0.580125	1.3273	0.34365	0.34793	0.716692
Tcf24	0.00439185	0.012287	0.0117752	0.00858765	0.00952868	0	0	0.00393992	0	0.00593813	0.00537583	0.00130912	0.00105909	0	0.00187645	0	0.00937726	0	0.0143026	0.0219686	0.00210733	0.0220406	0.00378434	0.0207922	0.0128394	0.0040465	0.00936259	0.0104507	0.00499735	0.00417213	0.0261207	0.0204082	0	0.0146856	0.0175005	0.000814157	0.00377108	0.00818797	0.0113946	0	0	0	0	0.00664448	0.00609164	0	0.0117034	0.0483459	0.139852
Ppp1r42	0.00110472	0	0	0	0	0	0	0	0.00377132	0.00375845	0	0.00290256	0	0.00220877	0	0	0.00643101	0	0	0	0	0	0	0	0	0	0	0	0	0	0	0	0	0	0	0	0	0	0	0	0	0	0	0	0	0	0	0	0.00129558
Gm15818	0	0	0	0	0	0	0	0	0	0	0	0	0	0	0	0	0	0	0	0	0	0	0	0	0	0	0	0	0	0	0	0	0	0	0	0	0	0	0	0	0	0	0	0	0	0	0	0	0
Cops5	0.715433	0.593581	0.768789	0.660155	0.770275	0.957139	0.702482	0.669272	0.670623	0.708719	0.877944	0.883219	0.94565	0.773468	0.903996	0.670592	0.670354	0.669618	0.56908	0.783348	0.876514	0.880084	0.932598	0.85196	0.955132	0.893419	0.757084	0.735229	0.616557	0.711583	0.863488	1.14038	0.813056	0.84208	0.879071	0.773302	0.625683	0.7535	0.611873	0.750136	0.880856	0.755939	0.807378	0.803854	0.72791	0.971611	1.11081	1.05092	0.883731
Cspp1	0.663037	0.491727	0.44247	0.55268	0.530392	0.694146	0.549878	0.509796	0.479416	0.452322	0.57538	0.403602	0.479604	0.51411	0.47098	0.564131	0.528378	0.580228	0.670673	0.608327	0.742652	0.536859	0.452175	0.58168	0.525734	0.561078	0.365402	0.373993	0.487759	0.375856	0.621112	0.577263	0.782804	0.581208	0.573811	0.69444	0.587314	0.615646	0.72831	0.613413	0.573207	0.550516	0.462532	0.427915	0.412397	0.669714	0.616974	0.801836	0.606645
Arfgef1	0.629563	0.549563	0.456562	0.493257	0.518135	0.467386	0.491721	0.549781	0.420827	0.411984	0.545614	0.537393	0.472567	0.452516	0.455564	0.581958	0.402184	0.542384	0.511625	0.478593	0.586094	0.487675	0.534967	0.498611	0.50599	0.588094	0.54425	0.571498	0.541034	0.551881	0.629395	0.522953	0.57153	0.482167	0.490448	0.639498	0.595979	0.456632	0.611476	0.48871	0.473617	0.470718	0.429168	0.319911	0.356183	0.6526	0.518557	0.681663	0.707727
Cpa6	0	0	0	0	0	0	0.00272903	0	0	0	0	0	0	0	0	0	0	0	0	0	0	0	0	0	0	0	0	0	0	0	0	0	0	0	0	0	0	0	0	0	0	0	0	0	0	0	0	0	0
Prex2	0.0122392	0.0180401	0.0131192	0.017304	0.0601406	0.0244303	0.0134401	0	0.00639355	0.00481639	0.00787752	0.00251601	0.00897618	0.00351148	0.00661501	0.0116968	0.0124197	0.00338363	0.0203955	0.0254225	0.0134448	0.00873555	0.0173542	0.0204967	0.022387	0.0164318	0.0126513	0.00376629	0.00868263	0.00814005	0.0268262	0.039085	0.00854806	0.0288078	0.0570582	0.0364074	0.0156717	0	0.0113946	0.0266407	0.00810766	0.00825222	0.00458085	0	0	0.0114093	0.0105624	0.0128116	0.00198357
A830018L16Rik	0	0	0	0	0	0	0.00227357	0	0	0	0	0	0	0	0	0	0	0	0	0	0	0	0	0	0	0.0117206	0.0361566	0.00914883	0.00369385	0	0	0	0	0.00382667	0	0	0	0	0	0	0.00686081	0	0	0	0	0	0	0	0
Gm17644	0	0	0	0	0	0	0	0	0	0.00135811	0	0	0	0	0	0	0	0	0	0	0	0	0	0	0	0	0	0	0	0	0	0	0	0	0	0	0	0	0	0	0	0	0	0	0	0	0	0	0
Gm29663	0	0	0	0	0	0	0	0	0	0	0	0	0	0	0	0	0	0	0	0	0	0	0	0	0	0	0	0	0	0	0	0	0	0	0	0	0	0	0	0	0	0	0	0	0	0	0	0	0
Sulf1	0.0628515	0.0564806	0.0661219	0.128319	0.0665367	0.0407522	0.00293235	0.0117709	0.010023	0.0127866	0.0161078	0.00488898	0.0165517	0.0200428	0.00837667	0.0158234	0.050356	0.0560395	0.038602	0.0461914	0.0150556	0.00581216	0.101407	0.0601008	0.0665067	0.0455162	0.119	0.0962846	0.0779706	0.0193707	0.0855713	0.0378115	0.0158026	0.0906568	0.0262383	0.0209686	0.0265456	0.0238252	0.0123219	0.0125083	0.200425	0.117062	0.0306814	0.049762	0.00302073	0	0.0027619	0.00805213	0.000787003
Slco5a1	0.00457213	0.00298557	0.00462843	0.0165591	0.00437127	0.0238635	0.00394069	0	0	0	0.00276714	0	0.00139274	0	0	0	0	0	0	0.00218066	0.00195153	0.00348396	0	0.0108629	0	0.00757475	0.0163066	0.0172589	0.00493959	0.00133497	0.0181782	0	0	0	0.00299259	0.0011595	0.0080626	0	0.0143664	0	0.0063488	0	0	0	0	0	0	0	0
Gm29283	0	0	0	0	0	0	0	0	0	0	0	0	0	0	0	0	0	0	0	0	0	0	0	0	0	0	0	0	0	0	0	0	0	0	0	0	0	0	0	0	0	0	0	0	0	0	0	0	0
Prdm14	0.00266469	0	0	0	0	0.00578003	0	0	0	0	0	0	0	0	0	0	0	0	0	0	0	0	0	0	0	0	0	0	0.00343827	0	0	0	0	0	0	0.00221524	0	0	0	0	0	0	0	0	0	0	0	0	0
Ncoa2	0.300228	0.363904	0.320253	0.315907	0.248842	0.260624	0.281089	0.359624	0.27531	0.260344	0.23558	0.21703	0.245046	0.2415	0.232894	0.352015	0.225431	0.367837	0.396625	0.328386	0.246095	0.23263	0.285474	0.392606	0.27719	0.283496	0.223305	0.251866	0.311868	0.229683	0.364187	0.407893	0.329148	0.487106	0.377001	0.354237	0.248139	0.349552	0.396631	0.341715	0.303146	0.248326	0.183094	0.234217	0.207399	0.269	0.290558	0.278755	0.314432
Gm29570	0.00171583	0.00263222	0	0	0	0.00550101	0	0	0	0	0.00428043	0.00186612	0	0	0	0	0	0	0	0	0.00235387	0	0	0.00319023	0.003949	0.0036627	0	0	0	0	0	0.00691886	0	0	0	0	0	0	0	0	0	0	0.00624064	0	0	0	0	0	0
Tram1	0.804069	0.674391	0.563641	0.562743	0.691899	0.687107	0.578131	0.369416	0.459038	0.470171	0.825256	0.627748	0.602566	0.56431	0.760535	0.769421	0.623909	0.492754	0.690011	0.764228	0.91118	0.776677	0.748974	0.704697	0.937327	1.06242	0.907772	0.802729	0.843858	0.869273	0.951553	0.969263	0.767804	0.728603	0.777985	0.8035	0.531439	0.628198	0.430974	0.660645	0.638878	0.545331	0.380331	0.467145	0.569571	1.18524	0.630243	0.653194	1.03654
Lactb2	0.0735975	0.0385713	0.0668396	0.139372	0.129461	0.0976486	0.0479796	0.0732533	0.0952344	0.106543	0.112567	0.0365718	0.0416074	0.0967527	0.0858163	0.120749	0.0692582	0.0392964	0.134754	0.0621226	0.0943691	0.0470531	0.0232201	0.109185	0.0671509	0.105929	0.0730867	0.0534059	0.14662	0.127756	0.158932	0.0893873	0.16485	0.130854	0.150916	0.104522	0.0754259	0.0618039	0.0776937	0.07852	0.133647	0.121138	0.0665687	0.169316	0.104874	0.348174	0.0715809	0.0166865	0.143607
Xkr9	0	0	0	0	0	0	0	0	0	0	0	0	0	0	0	0	0	0	0	0	0.00256747	0	0	0	0	0	0	0	0	0	0	0	0	0	0	0	0	0	0	0	0	0	0	0	0	0	0	0	0
Eya1	0.00559732	0.00874667	0.00386777	0	0.0124939	0.00319208	0.00893858	0.00311593	0.00309344	0	0	0.00440257	0.0107243	0	0.00221995	0	0	0.00463165	0.00310775	0	0.00243294	0.00564747	0.00219461	0	0.00553733	0.0226419	0.0134148	0.00602728	0.00464162	0.00792545	0	0	0	0	0.00588084	0.00178987	0.0230234	0.0145362	0	0.00289593	0.00295187	0	0	0	0.00134138	0.0114382	0	0.0192443	0.017171
Gm9947	0	0.00345045	0	0	0	0.00206687	0.00259172	0.00478072	0.00983004	0.0127994	0.00146297	0.00227925	0.0129658	0.0225274	0.00686648	0.00368911	0.00858836	0.0352596	0.0813258	0.0586796	0	0	0	0.00282746	0.000691124	0.00837099	0.0114777	0.0345415	0.0428625	0.0547265	0	0	0.0128284	0.106889	0.0472363	0	0.0112658	0.0257459	0.0228388	0.0150841	0	0	0	0	0.00721463	0	0	0	0
Msc	0	0	0	0	0.00758858	0.0100149	0	0.0168024	0.0180695	0.0139104	0.00129141	0.00126689	0.0352285	0.0498112	0.148962	0.0126048	0.018108	0.0849234	0.138898	0.28808	0	0	0.0179529	0.00866987	0.017294	0.0128845	0.0198787	0.0573501	0.124598	0.183014	0.0220804	0.0138193	0.0370639	0.195592	0.193634	0	0	0.0814135	0.0331932	0.0777478	0	0	0	0.0058189	0.00271455	0	0.00278774	0	0.000904375
Trpa1	0	0	0	0	0	0	0	0	0	0	0	0	0	0	0	0.00398641	0	0	0	0	0	0	0	0	0	0	0	0	0	0	0	0	0	0	0	0	0	0	0	0	0	0	0	0	0	0	0	0	0
Kcnb2	0.0022216	0.00434043	0	0	0	0.0207497	0	0	0	0	0.00289821	0.00182166	0.0023436	0.0050813	0	0	0.00433419	0	0	0	0.00212445	0.00435945	0	0	0	0	0	0	0	0.0031833	0	0	0	0	0.00334236	0	0	0	0	0	0.0172809	0.00262663	0	0.00802262	0	0	0	0.00367096	0
Terf1	0.175455	0.115986	0.102568	0.193367	0.305513	0.1416	0.0851456	0.11009	0.205757	0.184788	0.133232	0.0775141	0.119941	0.135442	0.142494	0.154789	0.149754	0.227459	0.297763	0.278474	0.152058	0.0876931	0.179444	0.205501	0.204966	0.124556	0.0723029	0.0951084	0.214388	0.184404	0.22407	0.14959	0.149845	0.226231	0.207601	0.128934	0.075517	0.167404	0.1556	0.198998	0.12788	0.07741	0.059886	0.0811345	0.137185	0.0943787	0.194547	0.24898	0.189556
Sbspon	0.00317834	0	0	0	0	0.00891135	0.014632	0.00221885	0.00362055	0.0055898	0.00118342	0.00126689	0.00309737	0.00707414	0.0011075	0.00671321	0.00263041	0	0.00679256	0.00340146	0	0	0	0.00177369	0.0013112	0	0	0.0075437	0	0	0	0	0	0	0.0018949	0.0028491	0	0	0.00824623	0	0.0440275	0.0258675	0.00317824	0.00444989	0	0	0	0	0
4930444P10Rik	0.00134962	0	0	0	0	0	0.0027243	0	0	0.00111264	0.00278628	0	0	0.00193356	0	0.00262644	0	0	0	0.00218377	0	0.00143219	0.00155036	0.00398538	0	0	0	0	0	0	0.00396194	0	0	0	0	0	0	0	0	0.00273164	0	0	0	0	0.00152927	0	0	0	0
Rpl7	25.7969	26.9716	29.878	29.4233	28.5757	26.8272	30.4963	32.6315	29.7859	29.7777	32.4493	38.6976	37.4971	36.9937	34.1293	29.5127	32.508	36.2996	32.2734	31.0634	32.5312	36.2654	33.5663	32.5881	31.2046	26.0101	27.2698	30.893	26.4326	26.8574	26.2258	31.3351	34.6616	31.2943	31.2836	30.1241	32.7109	37.7041	33.2569	31.4368	20.5327	23.603	26.0087	24.9399	26.9638	27.7564	33.8585	29.1841	18.1576
Rdh10	0.461165	0.599901	0.770066	0.412298	0.145837	0.117667	0.182067	0.157628	0.0948827	0.0759447	0.111263	0.145497	0.146697	0.111334	0.134968	0.219492	0.193302	0.225245	0.186175	0.220104	0.17802	0.220777	0.571894	0.369675	0.1613	0.125105	0.137644	0.173621	0.261296	0.0891814	0.0591548	0.141995	0.061907	0.0944137	0.079576	0.216386	0.209942	0.227283	0.334215	0.092372	0.107634	0.100191	0.0863655	0.127535	0.0893645	0.0948205	0.125856	0.183033	0.109223
Gm28095	0	0	0	0	0	0.00263015	0	0	0	0	0	0	0	0	0	0	0	0	0	0	0	0	0	0	0	0	0.00297225	0	0	0	0	0	0	0	0	0	0	0	0.00435347	0	0	0	0	0	0	0	0	0	0
Stau2	0.199269	0.169809	0.13326	0.149781	0.178753	0.156903	0.166784	0.106267	0.0965698	0.122477	0.155173	0.0889535	0.0780959	0.110679	0.0880555	0.12288	0.148489	0.0928192	0.0953512	0.0826979	0.245725	0.119873	0.150312	0.121293	0.121911	0.158753	0.171299	0.0492663	0.116605	0.109219	0.220095	0.149631	0.171746	0.0810419	0.128727	0.135258	0.0925644	0.107862	0.132181	0.125598	0.163671	0.082277	0.117513	0.116728	0.0913725	0.22122	0.105547	0.180963	0.211568
Gm7568	0.00154237	0	0	0	0	0	0	0	0	0	0	0	0	0	0	0	0.00772087	0	0	0	0	0	0	0	0	0	0	0	0	0	0	0	0	0	0	0	0	0	0	0	0.0134035	0	0	0	0	0	0	0	0
Ube2w	0.394383	0.317515	0.331062	0.381045	0.423641	0.421392	0.308826	0.251665	0.482933	0.465696	0.304048	0.199332	0.21687	0.410665	0.38938	0.369333	0.23717	0.227575	0.45537	0.407357	0.284079	0.192197	0.272339	0.334947	0.392925	0.367021	0.223152	0.196989	0.34503	0.323116	0.44611	0.355127	0.215219	0.477942	0.412804	0.376295	0.206758	0.324286	0.293208	0.478146	0.461459	0.2303	0.263419	0.431949	0.451568	0.284747	0.167213	0.222823	0.415514
Eloc	1.57316	1.25726	1.26266	1.74593	1.14871	1.38443	0.992206	0.888486	1.20549	1.31176	1.61539	1.17718	0.988197	1.52751	1.2618	1.7815	0.881334	0.96086	1.41081	1.1996	1.6713	1.35445	1.1993	1.70453	1.38567	1.46049	1.00995	0.85534	1.14122	1.1641	1.09429	0.699585	0.66866	0.794115	0.994285	1.30091	1.06674	0.956984	1.41471	1.09496	1.61262	1.08135	0.992296	1.42667	1.43037	1.98564	1.1178	1.06916	1.69088
D030040B21Rik	0.00496037	0.00617543	0	0.0149073	0.00323613	0	0.00242085	0.00864252	0.018619	0	0.0100098	0	0	0	0.0053442	0.00537521	0	0.00362464	0.00669322	0.00111276	0.00749623	0.00338047	0.00228956	0.0260975	0.00363728	0	0	0	0	0	0.0120344	0	0.0305366	0	0	0	0	0	0	0	0.0102198	0	0	0.0278666	0.0104879	0	0	0	0.00443365
Tmem70	0.350132	0.260386	0.265959	0.221521	0.35409	0.354819	0.246743	0.304667	0.259168	0.342324	0.364437	0.375102	0.480426	0.333552	0.465934	0.405998	0.222765	0.263372	0.315631	0.356454	0.412761	0.396155	0.306898	0.378849	0.410779	0.322975	0.282353	0.357145	0.327792	0.358234	0.45237	0.366484	0.409872	0.26498	0.420527	0.268621	0.187138	0.349865	0.191206	0.43432	0.510406	0.430341	0.439589	0.526032	0.463542	0.44818	0.777133	0.632012	0.645129
Ly96	0.164627	0.0982359	0.0729185	0.128253	0.17125	0.11193	0.0545408	0.0697201	0.0922341	0.0885558	0.101877	0.061048	0.0793546	0.109197	0.129611	0.082391	0.0329167	0.083143	0.120351	0.22033	0.176219	0.0768118	0.099765	0.214889	0.220554	0.103202	0.0691099	0.0402136	0.136651	0.0901102	0.114025	0.0437578	0.116715	0.124003	0.158767	0.122733	0.0534246	0.0709087	0.0950123	0.146455	0.0853627	0.0515228	0.0602025	0.126033	0.0774205	0.0858692	0.0247686	0.0633778	0.0834609
Gm28376	0	0	0	0	0	0	0	0	0	0	0	0	0	0	0	0	0	0	0	0	0	0	0	0	0	0	0	0	0	0	0	0	0	0	0	0	0	0	0	0	0	0	0	0	0	0	0	0	0.000857329
Jph1	0.0448764	0.0386922	0.0556052	0.0465719	0.00539727	0.116405	0.0972636	0.0758697	0.0756391	0.0435339	0.0353763	0.0375517	0.0405016	0.0400247	0.0251152	0.0517828	0.0527959	0.0327869	0.0223249	0.0209876	0.0352968	0.0155555	0.0198653	0.010319	0.00859016	0.0276777	0.0361043	0.0230211	0.03136	0.0159911	0.0352123	0.0156128	0	0.0140253	0.0370074	0.0369093	0.0670511	0.0214664	0.0300658	0.0110612	0.0909156	0.152603	0.067381	0.0551174	0.0420261	0.0673847	0.0430907	0.0232064	0.0227424
Gm28783	0	0	0	0	0	0	0	0	0	0	0	0	0	0	0	0	0	0	0	0	0	0	0	0	0	0	0	0	0	0	0	0	0	0	0	0	0	0	0	0	0	0	0	0	0	0	0	0	0
Gdap1	0	0	0	0	0	0	0.00237631	0	0	0	0	0.00324252	0	0	0	0	0	0	0	0	0.00154846	0	0	0	0	0	0	0	0	0	0	0	0	0	0	0	0	0	0	0	0.00369475	0	0	0	0	0	0	0	0.00117134
Gm28784	0	0	0	0	0	0	0	0	0	0	0	0	0	0	0	0	0	0	0	0	0	0	0	0	0	0	0	0	0	0	0	0	0	0	0	0	0	0	0	0	0	0	0	0	0	0	0	0	0
Pi15	0.0177988	0.0175407	0.0166499	0.0180219	0.00982434	0.57911	0.320614	0.25176	0.548127	0.58398	0.195278	0.12361	0.0963627	0.179082	0.156153	0.599489	0.322878	0.273641	0.626299	0.577587	0.168036	0.0490768	0.0613663	0.0829168	0.0797413	0.516272	0.218852	0.178109	0.286569	0.184918	0.751604	0.317498	0.423125	0.651338	0.465126	0.138255	0.116812	0.0746015	0.320234	0.279851	0.500158	0.283735	0.296116	0.540542	0.562035	0.00345975	0.00517799	0.00297359	0.00429474
Gm28154	0.00180054	0.00395805	0	0	0	0.010745	0	0	0.0107877	0.0193624	0.00638965	0	0	0	0	0.00224012	0	0	0	0.0316278	0.00502683	0	0	0.00224795	0.0075822	0	0	0	0.00700133	0	0	0	0	0	0.00825285	0	0	0	0	0	0	0	0	0.00427026	0.012044	0	0	0	0
Gm16070	0.00659955	0	0	0	0	0.00667801	0	0	0.00225133	0	0.00937197	0	0	0	0.00226039	0.00688789	0	0	0.00472554	0.00221619	0.023576	0.00577496	0.0065938	0.0081242	0.00500724	0.00306872	0.00408119	0	0	0	0.0210459	0	0	0	0.00141933	0.00263336	0	0	0	0.00250314	0.0226613	0	0	0.010012	0	0	0	0	0
Crispld1	0.118845	0.0638202	0.0208972	0.0319829	0.0222493	0.20493	0.0714632	0.0275099	0.0363429	0.0306621	0.155101	0.0362826	0.0266368	0.0710802	0.0461152	0.178086	0.0472372	0.010454	0.0378069	0.0280896	0.413042	0.283288	0.207101	0.189107	0.168138	0.112407	0.0416798	0.0210031	0.0314769	0.0109371	0.210218	0.0820878	0.0540569	0.0522316	0.0209287	0.0881166	0.0141246	0.0286031	0.0285199	0.0106195	0.162205	0.117596	0.0524371	0.0388007	0.0189838	0.00691951	0	0	0.00277505
Gm28153	0	0	0	0	0	0	0	0	0	0	0	0	0	0	0	0	0	0	0	0	0	0	0	0	0	0	0	0	0	0	0	0	0	0	0	0	0	0	0	0	0	0	0	0	0	0	0	0	0
Crisp4	0	0	0	0	0	0	0	0	0	0	0	0	0	0	0	0	0	0	0	0	0	0	0	0	0	0	0	0	0	0	0	0	0	0	0	0	0	0	0	0	0	0	0	0	0	0	0	0	0
Defb18	0	0	0	0	0	0	0	0	0	0	0	0	0	0	0	0	0	0	0	0	0	0	0	0	0	0	0	0	0	0	0	0	0	0	0	0	0	0	0	0	0	0	0	0	0	0	0	0	0
Defb41	0	0	0	0	0	0	0	0	0	0	0	0	0	0	0	0	0	0	0	0	0	0	0	0	0	0	0	0	0	0	0	0	0	0	0	0	0	0	0	0	0	0	0	0	0	0	0	0	0
Gm15825	0	0	0	0	0	0	0	0	0	0	0	0	0	0	0	0	0	0	0	0	0	0	0	0	0	0	0	0	0	0	0	0	0	0	0	0	0	0	0	0	0	0	0	0	0	0	0	0	0
Tfap2d	0	0	0	0	0	0	0	0	0	0	0	0	0	0	0	0	0	0	0	0	0	0	0	0	0	0	0	0	0	0	0	0	0	0	0	0	0	0	0	0	0	0	0	0	0	0	0	0	0
Tfap2b	0	0	0	0	0	0	0	0	0	0	0	0	0	0	0	0	0	0	0	0	0	0	0	0	0	0	0	0	0	0	0	0	0	0	0	0	0	0	0	0	0	0	0	0	0	0	0	0	0
Gm28340	0	0	0	0	0	0	0	0	0	0	0	0	0	0	0	0	0	0	0	0	0	0	0	0	0	0	0	0	0	0	0	0	0	0	0	0	0	0	0	0	0	0	0	0	0	0	0	0	0
Pkhd1	0	0	0	0	0	0	0	0	0	0	0	0	0	0	0	0	0	0	0	0	0	0	0	0	0	0	0	0	0	0	0	0	0	0	0	0	0	0	0	0	0	0	0	0	0	0	0	0	0
4930486I03Rik	0	0	0	0	0	0	0	0	0	0	0	0	0	0	0	0	0	0	0	0	0	0	0	0	0	0	0	0	0	0	0	0	0	0	0	0	0	0	0	0	0	0	0	0	0	0	0	0	0
Gm28653	0	0	0	0	0	0	0	0	0	0	0	0	0	0	0	0	0	0	0	0	0	0	0	0	0	0	0	0	0	0	0	0	0	0	0	0	0	0	0	0	0	0	0	0	0	0	0	0	0
Il17a	0	0	0	0	0	0	0	0	0	0	0	0	0	0	0	0	0	0	0	0	0	0	0	0	0	0	0	0	0	0	0	0.00923297	0	0	0	0	0	0	0	0	0	0	0	0	0	0	0	0	0
Il17f	0.00170438	0	0	0	0	0	0	0	0	0	0.00165499	0	0	0	0	0	0.00347469	0	0	0	0	0	0	0	0	0.00194154	0	0	0	0	0	0	0	0	0	0	0	0	0	0	0	0	0	0	0	0	0	0	0
Mcm3	0.149917	0.140673	0.213184	0.0525517	0.139373	0.0961817	0.0605266	0.0919635	0.026868	0.0621775	0.221119	0.207801	0.184782	0.0618928	0.134384	0.106444	0.0780938	0.0866653	0.0746543	0.0588088	0.226504	0.401553	0.235835	0.112763	0.160854	0.219265	0.214248	0.146068	0.0820235	0.10956	0.135389	0.115695	0.0900069	0.0987512	0.0812053	0.141811	0.0792423	0.0985879	0.0499728	0.0469537	0.14641	0.198807	0.0669378	0.0414233	0.0439155	0.34323	0.202621	0.176884	0.109361
Gm28065	0	0	0	0	0	0	0	0	0	0	0	0	0	0	0	0	0	0	0	0	0	0	0	0	0	0	0	0	0	0	0	0	0	0	0	0	0	0	0	0	0	0	0	0	0	0	0	0	0.00142003
6720483E21Rik	0	0	0	0	0	0.00227153	0	0	0	0	0.00272779	0	0	0	0	0	0	0.00482063	0	0	0	0	0	0	0	0	0	0	0	0	0	0	0.0147628	0	0.00329471	0	0	0	0	0	0	0	0	0	0.00293225	0.00793953	0	0	0.0015217
Paqr8	0.0277235	0.0284629	0	0.0248773	0.0257474	0.0455738	0.00930515	0.0269641	0.045725	0.0452941	0.01121	0.003398	0.0120082	0.0102741	0.0234267	0.0142296	0.0150995	0.023185	0.0205275	0.0206079	0.0123698	0.00482342	0.0182102	0.0245607	0.0197539	0.0231336	0.012162	0	0.0291669	0.017003	0.0256644	0.0127372	0.0153876	0.00458864	0.0299074	0.0312437	0	0.0237644	0.0114729	0.00991946	0.0864428	0.01492	0.0559411	0.0347587	0.0296827	0.155194	0.136919	0.291941	0.260213
Efhc1	0.0123616	0.00922674	0.0338729	0.0185508	0.013388	0.0166106	0.0226614	0.024964	0.0213961	0.0238164	0.0195863	0.0131138	0.0243666	0.0266361	0.0425299	0.0237939	0.0233589	0.0521859	0.0270916	0.0297398	0.0262874	0.0154498	0.0220188	0.0481169	0.0221927	0.0193695	0.0221925	0.028538	0.0244885	0.0232042	0.0314357	0.0340152	0	0.0583958	0.00653219	0.0211532	0.0113983	0.0233643	0.0197209	0.0292994	0.0218279	0.0306358	0.0357708	0.0250093	0.0259252	0.0214512	0.0179902	0.0247166	0.0184185
Tram2	0.193243	0.248685	0.381961	0.34009	0.229455	0.165637	0.206948	0.297158	0.206385	0.202999	0.124643	0.215402	0.187221	0.210635	0.195906	0.15323	0.244337	0.256337	0.22817	0.163833	0.115268	0.13258	0.231406	0.250634	0.187243	0.231137	0.326009	0.420098	0.344454	0.337587	0.245289	0.289471	0.363943	0.274516	0.268248	0.185042	0.277544	0.324392	0.349679	0.330381	0.089658	0.176188	0.220946	0.208439	0.172306	0	0.024975	0.0896782	0.0511604
Gm28287	0	0	0	0	0	0	0	0	0	0	0	0	0	0	0	0	0	0	0	0	0	0	0	0	0	0	0	0	0	0	0	0	0	0	0	0	0	0	0	0	0	0	0	0	0	0	0	0	0
Tmem14a	0.0672492	0.0925381	0.0663503	0.100587	0.0771604	0.093102	0.137624	0.145275	0.0968693	0.122694	0.0619508	0.0686987	0.0972865	0.0719653	0.0686705	0.100306	0.0835364	0.0886244	0.044685	0.10211	0.0485246	0.0517895	0.0572191	0.0361915	0.0657814	0.07792	0.0921218	0.121957	0.144941	0.0737071	0.112878	0.13289	0.0763883	0.0984488	0.105516	0.0872708	0.0676936	0.116857	0.128547	0.0991767	0.123149	0.180307	0.162708	0.123673	0.154732	0.0988903	0.166486	0.243315	0.180957
Gsta3	0.015077	0.00468639	0	0.00768678	0.0378864	0	0.00356531	0.0226863	0.00121813	0.0145103	0.00818587	0.0335954	0.120546	0.127757	0.106857	0.0428992	0.0715893	0.103739	0.221139	0.164931	0.00695034	0.0132413	0.0767483	0.0505192	0.0626817	0.0150056	0.0208502	0.0342488	0.196427	0.0927625	0	0.015583	0.0864989	0.189898	0.128529	0.00273326	0.00820907	0.040904	0.0551729	0.037441	0	0.00296621	0.00519642	0.00793513	0.00506145	0.0165301	0.0189634	0.030524	0.0586637
Gm28836	0	0	0	0	0	0	0	0	0	0	0	0	0	0	0	0	0	0	0	0	0	0	0	0	0	0	0	0	0	0	0	0.00882243	0	0	0	0	0	0	0	0	0	0	0	0	0	0	0	0	0.00102892
Khdc1a	0	0	0	0	0	0	0	0	0	0	0.00172792	0	0	0	0	0	0.00692275	0	0	0	0	0	0	0	0	0	0	0	0	0	0	0	0	0	0	0	0	0	0	0	0.0643203	0.00825222	0	0	0	0	0	0	0
Khdc1c	0	0	0	0	0	0	0	0	0	0	0	0	0	0	0	0	0	0	0	0	0	0	0	0	0	0	0	0	0	0	0	0	0	0	0	0	0	0	0	0	0	0	0	0	0	0	0	0	0
Khdc1b	0.00840096	0	0	0	0	0.00219042	0.00237631	0	0	0	0.00508513	0	0	0	0	0	0	0	0	0	0	0	0	0	0	0	0	0	0	0	0	0	0	0	0.00270984	0.00222539	0	0	0	0	0	0	0	0	0	0	0	0	0
Kcnq5	0.00578733	0.0109142	0.0326464	0.034478	0.0316808	0.00489899	0.0126441	0.0238597	0.017289	0.0119322	0	0	0	0.00475419	0	0	0	0	0	0.00617513	0	0	0.00715077	0.00618254	0.00158788	0	0	0	0.00188592	0.00349807	0.0488496	0	0.0448191	0.00295653	0.0056416	0.0067294	0.0128415	0.00632334	0.00573933	0.0276814	0.0634408	0.0430133	0.0338454	0.039794	0.0452757	0	0.00949954	0	0.00482808
Gm26580	0	0	0	0.00630217	0.00394728	0	0.0132783	0	0	0.00501516	0	0	0	0	0	0	0	0	0	0	0	0	0	0	0	0	0	0	0	0	0	0	0	0.00562713	0.00197352	0.00223457	0	0.0124045	0	0	0	0.0116142	0.00340136	0	0.00185373	0	0	0	0
Rims1	0.00148679	0.0058936	0.0113591	0.00668017	0	0.00587855	0.00273199	0.00382645	0.00530142	0	0	0.000941999	0	0	0.00130647	0.00344068	0	0	0	0.00157133	0.00556259	0	0.00141119	0	0	0.00221653	0	0	0	0	0.00520408	0.00841822	0.00593137	0	0.00783287	0.00197941	0	0	0	0.0112116	0.0177887	0.0330946	0.00838601	0.00608507	0	0	0	0	0
4933415F23Rik	0	0	0	0	0	0	0	0	0	0	0	0	0	0	0	0	0	0	0	0	0	0	0	0	0	0	0	0	0	0	0	0	0	0	0	0	0	0	0	0	0	0	0	0	0	0	0	0	0
Gm27028	0	0	0	0	0	0	0	0	0	0	0	0	0	0	0	0	0	0	0	0	0	0	0	0.00620749	0	0	0	0	0	0	0	0	0	0	0	0	0	0	0.00564287	0	0	0	0.00314624	0	0	0	0	0	0
Gm29107	0.0334151	0.00593322	0.00519937	0.0466143	0.00434516	0.042409	0.00704691	0.00861731	0.0382317	0.0211959	0.0101577	0.00654851	0.00434482	0.0105259	0.0040515	0.0292082	0.0064613	0.00382785	0.0257119	0.0276874	0.00788342	0.00555033	0.00186046	0.0279523	0.00683254	0.0295882	0	0	0.0316628	0.0143752	0.0184899	0	0.00674131	0.0134571	0.00231324	0.0407689	0.0121787	0.00651824	0.0643155	0.010238	0.0307561	0	0	0.0090127	0.011953	0.126322	0.00643049	0.00442782	0.0127415
Ogfrl1	0.17999	0.183177	0.240033	0.152943	0.191349	0.155683	0.154404	0.151894	0.153814	0.160443	0.186818	0.0856831	0.116717	0.0943103	0.128666	0.113832	0.1675	0.0879938	0.135297	0.136617	0.207116	0.164069	0.120851	0.122664	0.189489	0.115291	0.0679883	0.1242	0.100146	0.0998007	0.22332	0.115968	0.105153	0.114666	0.119471	0.159244	0.0658349	0.118266	0.154376	0.149216	0.22624	0.155329	0.0969014	0.128263	0.163051	0.0974706	0.0645321	0.0388798	0.0706809
Gm28822	0	0	0	0	0	0	0	0	0	0	0	0	0	0	0	0	0	0	0	0	0	0	0	0	0	0	0	0	0	0	0	0	0	0	0	0	0	0	0	0	0	0	0	0	0	0	0	0	0
B3gat2	0.0107387	0.0244607	0.032998	0.0325446	0.0157256	0.0156987	0.0474643	0.0315594	0.0193615	0.0251627	0.00369514	0.0162253	0.0114412	0.0277285	0.00190989	0.0116919	0.0461586	0.0180696	0.0420685	0.0539385	0.00540581	0.0137226	0.0230913	0.0221758	0.0187781	0.00628003	0.0329999	0.0226376	0.0201228	0.0264841	0.00700508	0.00889937	0.0525425	0.0402389	0.0150802	0.012161	0.0305959	0.0190101	0.0236423	0.038454	0.011476	0.0773235	0.0237117	0.0244375	0.0308228	0	0.0133246	0.0182798	0.0243904
Smap1	1.33945	1.23354	1.2533	0.909306	1.12341	1.43693	1.44691	1.28028	1.32918	1.34486	1.10032	1.32124	1.0686	1.24456	1.24755	1.38993	1.26346	1.13614	1.19782	1.4219	1.17185	1.3543	1.4421	1.32983	1.39475	1.37475	1.46291	1.1766	1.25928	1.22197	1.34929	0.921618	1.31479	1.41456	1.285	1.23677	1.44054	1.20891	1.16395	1.29177	1.45839	1.66065	1.41503	1.45013	1.46556	0.962423	1.13439	1.19145	1.21929
Sdhaf4	0.336797	0.155255	0.19973	0.239415	0.36393	0.305206	0.134836	0.166985	0.248204	0.276858	0.300576	0.174204	0.223344	0.214926	0.324142	0.286998	0.196952	0.130822	0.156095	0.233534	0.274022	0.176176	0.113785	0.270355	0.243006	0.307115	0.1382	0.217248	0.318476	0.302835	0.307309	0.32264	0.206011	0.372878	0.411775	0.225018	0.114078	0.210895	0.128307	0.280842	0.308074	0.232236	0.292196	0.371562	0.386624	0.362572	0.377711	0.296425	0.385591
Fam135a	0.256539	0.173612	0.234687	0.282167	0.170136	0.182345	0.15567	0.195314	0.22606	0.159037	0.173243	0.151213	0.153704	0.182135	0.148803	0.214128	0.19218	0.218394	0.301459	0.180891	0.221752	0.1943	0.146445	0.238026	0.169386	0.259932	0.200736	0.155627	0.241785	0.172917	0.308121	0.117723	0.206596	0.227559	0.169404	0.296178	0.225862	0.183698	0.213974	0.192177	0.171859	0.102351	0.121896	0.233469	0.112926	0.217205	0.105268	0.19093	0.187763
Col9a1	0.00221258	0	0	0	0.00138009	0.00320601	0.0200125	0.00314575	0	0	0	0	0	0	0	0	0	0	0	0	0.00487129	0	0	0	0.00126356	0	0	0.0137183	0	0	0	0.00563928	0	0	0	0	0	0	0	0	0.00148964	0.00609606	0.00393856	0	0	0	0	0	0
Col19a1	0	0	0	0	0	0	0	0	0	0	0	0	0	0	0	0.00216687	0	0	0	0	0	0	0	0	0	0	0	0	0	0	0	0	0	0	0	0.00214785	0	0	0	0	0	0	0	0	0	0	0	0	0
Lmbrd1	0.393268	0.26059	0.237441	0.223915	0.431264	0.252824	0.202732	0.211087	0.314344	0.366747	0.244878	0.157287	0.147906	0.271424	0.283981	0.251539	0.280273	0.290809	0.327999	0.414101	0.24176	0.241325	0.204257	0.32055	0.343146	0.307241	0.18431	0.257398	0.334735	0.345329	0.278844	0.237617	0.317799	0.360038	0.389623	0.266957	0.213667	0.0956013	0.195904	0.358767	0.298693	0.247681	0.221947	0.37264	0.378841	0.228154	0.206623	0.248322	0.473719
Gm28237	0	0	0	0	0	0	0	0	0	0	0	0	0	0	0	0	0	0	0	0	0	0	0	0	0	0	0	0	0	0	0	0	0	0	0	0	0	0	0	0	0	0	0	0	0	0	0	0	0
Gm29414	0	0	0	0	0	0	0	0	0	0	0	0	0	0	0	0	0	0	0	0	0	0	0	0	0	0	0	0	0	0	0	0	0	0	0	0	0	0	0	0	0	0	0	0	0	0	0	0	0
Adgrb3	0.00193143	0	0	0	0	0	0	0	0	0	0.00203659	0	0	0	0	0.0030884	0	0	0	0	0.00274432	0	0	0	0	0	0	0	0	0	0	0	0	0	0	0	0	0	0	0	0	0	0	0	0	0	0	0	0
4931408C20Rik	0	0	0	0	0	0	0	0	0	0	0	0	0	0	0	0	0	0	0	0	0	0	0	0	0	0	0	0	0	0	0	0	0	0	0	0	0	0	0	0	0	0	0	0	0	0	0	0	0
Gm5524	0.00187793	0	0	0	0	0	0	0	0	0	0	0	0	0	0	0	0	0	0	0	0	0	0	0	0	0	0	0	0	0	0	0	0	0	0	0.00211479	0	0	0	0	0	0	0	0	0	0	0	0	0
Gm597	0	0	0	0	0	0	0	0	0	0	0	0	0	0	0	0	0	0	0	0	0	0	0	0	0	0	0	0	0	0	0	0	0	0	0	0	0	0	0	0	0	0	0	0	0	0	0	0	0
Gm9898	0	0	0	0	0	0	0	0	0.00220812	0	0	0	0	0	0	0	0	0	0	0	0	0	0	0	0	0	0	0	0	0	0	0	0	0	0	0	0	0	0	0	0	0	0	0	0	0	0	0	0
Phf3	1.36973	1.36264	1.23126	1.3432	1.22313	1.19146	1.22948	1.29819	1.2779	1.15857	1.01315	0.942587	1.12734	0.940097	0.916428	1.05603	1.18348	1.39568	1.26467	1.1803	1.12251	1.12612	1.34904	1.28946	1.07813	1.11159	1.19756	1.00738	1.0073	0.972251	1.0622	1.25978	1.37937	1.5379	1.10298	1.25002	1.16596	1.22837	1.29225	1.0582	1.03646	1.2829	1.068	0.958809	0.913083	1.15067	1.35808	1.40327	1.06757
Ptp4a1	1.67837	2.21262	2.04486	2.21619	1.53003	1.24327	1.54524	1.60418	1.59042	1.54931	1.37814	1.43325	1.26236	1.36459	1.20402	1.44653	1.56505	1.37134	2.07508	1.32839	1.21416	1.5723	2.11236	2.31721	1.44391	1.53084	1.72021	1.41868	2.19021	1.59146	0.578353	0.572457	0.374383	0.550512	0.54633	2.02812	2.48051	2.05883	3.11142	2.40171	1.07446	1.01877	1.02628	0.892955	1.13149	2.20551	1.08176	0.998054	1.69853
Gm29669	0	0	0	0	0	0	0	0	0	0	0	0	0	0	0	0	0	0	0	0	0	0	0	0	0	0	0	0	0	0	0	0	0	0	0	0	0	0	0	0	0	0	0	0	0	0	0	0	0.0013026
Gm28644	0	0	0	0	0	0	0	0	0	0	0	0	0	0	0	0	0	0	0	0	0	0	0	0	0	0	0	0	0	0	0	0	0	0	0	0	0	0	0	0	0	0	0	0	0	0	0	0	0
4931428L18Rik	0	0	0	0	0	0	0	0	0	0	0.00249325	0	0	0	0	0	0	0	0	0	0	0	0	0	0	0	0	0	0	0	0	0	0	0	0	0	0	0	0	0	0	0	0	0	0	0	0	0	0
Gm29128	0	0	0	0	0	0	0	0	0.00300843	0	0	0	0	0	0	0	0	0	0	0	0	0	0	0	0	0	0	0	0	0	0	0	0	0	0	0	0	0	0	0	0	0	0	0	0	0	0	0	0.00139253
Lgsn	0	0	0	0	0	0	0	0	0	0	0	0	0	0	0	0	0	0	0	0	0	0	0	0	0	0	0	0	0	0	0	0	0	0	0	0	0	0	0	0	0	0	0	0	0	0	0	0	0
Pih1d3	0	0	0	0	0	0	0	0	0	0	0	0	0	0	0	0	0	0	0	0	0	0	0	0	0	0	0	0	0	0	0	0	0	0	0	0	0	0	0	0	0	0	0	0	0	0	0	0	0
Khdrbs2	0.00651697	0.00237359	0	0	0	0	0	0	0	0	0.00280793	0.00251601	0.00247208	0	0	0	0	0	0	0	0	0	0.00509867	0	0.00164821	0	0	0	0	0.00346865	0	0	0	0	0	0.00230139	0	0	0	0.00268295	0	0	0.00356735	0	0.00201373	0	0.0055238	0	0
Gm5415	0	0	0	0	0	0	0	0	0	0	0	0	0	0	0	0	0	0	0	0	0	0	0	0	0	0	0	0	0	0	0	0	0	0	0	0	0	0	0	0	0	0	0	0	0	0	0	0	0
Gm37724	0	0	0	0	0.00285158	0	0	0	0	0	0	0	0	0.00550543	0	0	0	0	0	0.00121722	0	0	0	0	0	0	0	0	0.00511797	0	0	0	0	0	0	0	0	0	0	0	0	0	0	0.00212473	0	0	0	0	0
Gm37591	0	0	0	0	0	0	0	0	0	0	0	0	0	0	0	0	0	0	0	0	0	0	0	0	0	0	0	0	0	0	0	0	0	0	0	0	0	0	0	0	0	0	0	0	0	0	0	0	0
Prim2	0.0901425	0.0683163	0.0834267	0.0807284	0.0599401	0.0692807	0.0886355	0.0547294	0.0651132	0.0599406	0.0848208	0.0707409	0.066241	0.0384224	0.0716811	0.081504	0.0691289	0.0784495	0.0567835	0.138526	0.0917043	0.102459	0.0670113	0.0956696	0.0821327	0.123666	0.0755858	0.0871094	0.0802456	0.0612593	0.0457385	0.0670807	0.120301	0.114807	0.0843996	0.06713	0.070181	0.0708108	0.0995306	0.0791582	0.0680972	0.0552919	0.0857465	0.0779394	0.0774243	0.0496531	0.0436421	0.0169542	0.036143
Rab23	0.111603	0.1292	0.0434999	0.135833	0.251009	0.161045	0.102517	0.0954914	0.143955	0.165134	0.142447	0.0747172	0.0986697	0.0879892	0.137488	0.130764	0.129252	0.0821608	0.119538	0.188936	0.146228	0.117827	0.0632212	0.0993435	0.155395	0.131741	0.0798754	0.110503	0.147867	0.173096	0.208184	0.156365	0.101615	0.107978	0.150681	0.131924	0.0787981	0.0651711	0.0853245	0.155099	0.191293	0.133558	0.166074	0.130908	0.199849	0.0537603	0.038294	0.105523	0.0432741
Bag2	0.200453	0.17277	0.202747	0.13367	0.275921	0.26596	0.225164	0.171292	0.211661	0.291576	0.174934	0.141474	0.125424	0.103484	0.155815	0.155975	0.0878585	0.107748	0.121698	0.219463	0.203035	0.0946314	0.0976757	0.152308	0.127979	0.1792	0.155818	0.155688	0.149447	0.184278	0.190201	0.19801	0.121968	0.156138	0.227968	0.159552	0.123115	0.107686	0.192498	0.159809	0.418653	0.301935	0.214561	0.392389	0.360475	0.249933	0.149842	0.147502	0.186775
Zfp451	0.734465	0.822892	0.603399	0.677815	0.549244	0.569601	0.725534	0.614627	0.494888	0.440253	0.687984	0.616977	0.720065	0.559753	0.55125	0.669476	0.625938	0.756823	0.613245	0.588047	0.673084	0.7463	0.767055	0.654067	0.648406	0.61257	0.725761	0.494488	0.492426	0.503573	0.537275	0.579503	0.973916	0.674844	0.562023	0.694774	0.722254	0.556378	0.764486	0.529322	0.509135	0.635704	0.460698	0.403348	0.337223	0.379087	0.6989	0.594081	0.404941
Bend6	0.00321789	0	0	0	0	0	0.00623108	0	0	0	0.00109521	0	0	0	0	0	0	0.00337732	0	0	0	0	0	0	0.000908432	0.00234948	0.00310251	0	0	0.00158173	0.00564625	0	0.0120396	0	0	0.0019486	0.00599127	0	0	0	0	0	0	0.00287041	0.00117582	0	0	0	0
Dst	1.20059	1.74869	1.92257	2.08143	1.48718	2.96632	3.6884	3.40386	2.9267	2.88157	0.542196	0.531872	0.484348	0.572578	0.475524	1.04546	1.14964	0.915597	1.12773	1.00437	0.366981	0.221672	0.332976	0.29875	0.281376	1.45663	1.7955	1.75786	1.4522	1.58657	1.37478	1.401	1.59359	1.76701	1.141	1.75569	2.05413	1.68087	2.39481	1.77665	3.98301	4.15925	3.62247	3.17256	3.18028	0.294082	0.261449	0.221277	0.362877
Gm37958	0	0	0	0	0	0	0	0	0	0	0	0	0	0	0	0	0	0	0	0	0	0	0	0	0	0	0	0	0	0	0	0	0	0	0	0	0	0	0	0	0	0	0	0	0	0	0	0	0
Gm37233	0.0371531	0.00403604	0.0313953	0.0524633	0.0277609	0.0262269	0.0279195	0.0383015	0.0155524	0.0160612	0.0452182	0.0139933	0.0174607	0.0116385	0.0386895	0.0235671	0.00427854	0.0245626	0.0228484	0.0296969	0.0352518	0.0427223	0.0829937	0.0660867	0.0687587	0.0221881	0.0184996	0.00734676	0.0136447	0.0236306	0.0165488	0.0180737	0.059672	0.0591213	0.006218	0.0230018	0.00534368	0.0164466	0.0238018	0.0139704	0.0134909	0.023223	0.0114913	0.0277941	0.00473024	0	0.0132541	0.0118719	0.00896764
Ccdc115	0.177629	0.102741	0.092491	0.106252	0.191573	0.13727	0.102299	0.064635	0.122714	0.228691	0.170949	0.150662	0.125401	0.16237	0.237591	0.105147	0.0863247	0.1357	0.105488	0.207867	0.157473	0.115119	0.0912041	0.157115	0.206539	0.155668	0.0949272	0.0906404	0.153238	0.188784	0.207409	0.195417	0.118565	0.147165	0.16993	0.111803	0.105484	0.108554	0.114653	0.166032	0.184916	0.102035	0.0851417	0.1253	0.175025	0.623375	0.228346	0.121627	0.211335
Gm28306	0	0	0	0	0	0	0	0	0	0	0	0	0	0	0.00164213	0.00322535	0	0	0	0	0	0	0	0	0	0	0	0	0	0	0	0.00902303	0	0	0	0	0	0	0	0	0	0	0	0	0	0	0	0	0
Imp4	0.164105	0.248102	0.220588	0.174024	0.297875	0.155726	0.198487	0.156731	0.204593	0.227042	0.26907	0.282842	0.361237	0.296991	0.323531	0.180999	0.144081	0.207704	0.15863	0.229958	0.234893	0.30184	0.297607	0.244526	0.30373	0.218832	0.266879	0.231102	0.240833	0.293402	0.253485	0.209139	0.237261	0.350721	0.297394	0.190087	0.236581	0.207306	0.208493	0.239143	0.189236	0.248769	0.183457	0.182375	0.216966	0.326653	0.404183	0.382131	0.348889
Ptpn18	0.0174431	0.00737643	0.0383388	0.0224188	0.0189837	0.0236793	0.0209697	0.0180398	0.00865843	0.00729507	0.0195445	0.0463603	0.0434397	0.0383092	0.0162374	0.0300754	0.0114251	0.0522862	0.00819951	0.029484	0.0329672	0.140212	0.157514	0.0702757	0.108198	0.012858	0.0128694	0.061237	0.0448236	0.0106016	0.0153742	0.0392898	0.0318634	0.0554258	0.0304183	0.00589229	0.0221645	0.00803434	0.0177795	0.0153231	0.00764112	0.0189281	0.00999503	0.00217664	0.0113791	0.0197191	0.0132246	0.0189463	0.00599878
4930568A12Rik	0	0	0	0	0	0	0	0	0	0	0	0	0	0	0	0	0	0	0	0	0	0	0	0	0	0	0	0	0	0	0	0	0	0	0	0	0	0	0	0	0	0	0	0	0	0	0	0	0
Prss39	0	0	0	0	0	0	0	0	0	0	0	0	0	0.00266141	0	0	0	0	0	0	0	0	0	0	0	0	0	0	0	0	0	0	0	0	0	0	0	0	0	0	0	0	0	0	0	0	0	0	0
Cfc1	0	0	0	0	0	0	0	0	0	0	0	0	0	0	0	0	0	0	0	0	0	0	0	0	0	0	0	0	0	0	0	0	0	0	0	0	0	0	0	0	0	0	0	0	0	0	0	0	0
Prss40	0	0	0	0	0	0	0	0	0	0	0	0	0	0	0	0	0	0	0	0	0	0	0	0	0	0	0	0	0	0	0	0	0	0	0	0	0	0	0	0	0	0	0	0	0	0	0	0	0
1700101I19Rik	0	0	0	0	0	0	0	0	0	0	0	0	0	0	0	0	0	0	0	0	0	0	0	0	0	0	0	0	0	0	0	0	0	0	0	0	0	0	0	0	0	0	0	0	0	0	0	0	0
Amer3	0	0	0	0	0	0	0	0	0	0	0	0	0	0	0	0	0	0	0	0	0	0	0	0	0	0	0	0	0	0	0	0	0	0	0	0	0	0	0	0	0	0	0	0	0	0	0	0	0
Arhgef4	0.0172798	0.00313564	0.00422055	0.0245497	0.0154595	0.00996812	0.00149747	0.0161082	0.0123484	0.0172215	0.00541295	0.0113126	0.00777247	0.00993513	0.0254308	0.0165344	0.00420942	0.0099089	0.00788946	0.0257534	0.00524574	0.00769415	0.00768565	0.0104277	0	0.00662913	0.0215479	0.0135035	0.0159632	0.0101579	0.0275682	0.0403309	0.00846883	0.0337272	0.00681506	0.00700641	0.00653491	0.00568068	0.0202494	0	0.0097465	0	0.00624064	0.0101241	0	0.0176962	0	0.00470588	0.012087
Gm38336	0.0150424	0.00210116	0	0.00954325	0.00467012	0.00684185	0.0104068	0.00242675	0.00742022	0.00502716	0.0156731	0.00185322	0.0163285	0.0206796	0.00182983	0.00642384	0.00389036	0.017561	0.0191594	0.00329073	0.010085	0.0110342	0.0183896	0.0139494	0.0054015	0	0	0	0.00485988	0.00328143	0.0180384	0.00610566	0	0.0127509	0	0.00197	0.00364376	0.00607997	0.0119555	0.00630012	0.0101079	0	0.00579576	0	0	0.00979758	0.00614865	0.0027049	0.00939908
Fam168b	0.540097	0.439869	0.505729	0.428656	0.428463	0.511161	0.439339	0.37638	0.293757	0.482369	0.421658	0.408545	0.473695	0.369982	0.370543	0.439826	0.428195	0.4047	0.384327	0.431025	0.507109	0.578665	0.471097	0.512866	0.46909	0.511844	0.391136	0.44641	0.419843	0.543888	0.57684	0.541744	0.672491	0.444983	0.507839	0.461783	0.413614	0.359193	0.476555	0.39669	0.511994	0.469817	0.302958	0.381007	0.381594	0.24688	0.417543	0.42827	0.471316
Plekhb2	0.00626279	0.00629357	0.013809	0.0306218	0.00866357	0.00190239	0	0.0281357	0.0227633	0.0243652	0.00446011	0	0.00742519	0.00550257	0.00360215	0	0	0	0.00449859	0.00111276	0.00297838	0.00463808	0.00192576	0.00983951	0	0.00192441	0.00280496	0	0	0.0102368	0	0	0	0	0.00931811	0.0073351	0	0.00998718	0	0.00963273	0.0283776	0.0284121	0.07488	0.0548072	0.0347602	0.0114093	0.0634479	0.0646156	0.17475
Gm37068	0	0	0	0	0	0	0	0	0	0	0	0	0	0	0	0	0	0	0	0	0	0	0	0	0	0	0	0	0	0	0	0	0	0	0	0	0	0	0	0	0	0	0	0	0	0	0	0	0
Gm28415	0	0	0	0	0	0	0	0	0	0	0	0	0	0	0	0	0	0	0	0	0	0	0	0	0	0	0	0	0	0	0	0	0	0	0	0	0	0	0	0	0	0	0	0	0	0	0	0	0
1110002O04Rik	0	0	0	0.0152596	0	0.0176161	0.00336975	0.00679198	0.00974008	0.00792393	0.00493845	0	0	0.00335278	0	0.00368113	0.0120911	0	0	0	0	0	0	0.00258223	0.000808173	0	0	0	0.00369385	0	0.00417996	0	0	0.0114524	0	0	0	0	0	0	0.0359324	0.0166226	0.0263852	0.0445498	0.0138492	0	0	0	0
Gm37146	0	0	0	0	0	0	0	0	0	0	0	0	0	0	0	0	0	0	0	0	0	0	0	0	0	0	0	0	0	0	0	0	0	0	0	0	0	0	0	0	0	0	0	0	0	0	0	0	0
Gm33222	0	0	0	0	0	0	0	0	0	0	0	0	0	0	0	0	0	0	0	0	0	0	0	0	0	0	0	0	0	0	0	0	0	0	0	0	0	0	0	0	0	0	0	0	0	0	0	0	0
4930535G08Rik	0	0	0	0	0	0	0	0	0	0	0	0	0	0	0	0	0	0	0	0	0	0	0	0	0	0	0	0	0	0	0	0	0	0	0	0	0	0	0	0	0	0	0	0	0	0	0	0	0
Hs6st1	0.119571	0.151495	0.1351	0.0944707	0.0972546	0.116105	0.14202	0.145817	0.148397	0.11668	0.121868	0.0966434	0.101468	0.122303	0.11809	0.10698	0.13359	0.165412	0.163848	0.194958	0.126722	0.143571	0.245735	0.146337	0.158293	0.133242	0.126962	0.122989	0.197688	0.0989336	0.116177	0.0638984	0.0905893	0.140949	0.122954	0.125997	0.107172	0.118216	0.198139	0.0959814	0.132968	0.114355	0.124605	0.143336	0.106702	0.0378035	0.0975867	0.158533	0.0742213
Gm37335	0.00142234	0	0	0	0	0	0	0	0	0.00177692	0	0	0	0.00315916	0	0	0	0	0	0	0.00202633	0	0	0.00306792	0.00227352	0	0	0	0	0	0	0	0.00606537	0	0	0	0	0	0	0	0	0.00646334	0	0	0	0	0	0	0
Gm33280	0.00298691	0	0	0	0.00404315	0	0.00223941	0	0	0	0	0.00216841	0.00258735	0.00315876	0	0.00273715	0.0050391	0	0	0.00296167	0	0.00262668	0.00527517	0	0.000861743	0	0	0	0	0	0	0	0	0	0	0.00604426	0	0	0	0	0	0	0	0	0	0.00774473	0	0	0.000834939
Uggt1	0.242051	0.189131	0.265101	0.168096	0.282725	0.272593	0.26525	0.270137	0.162652	0.221267	0.24585	0.226578	0.222332	0.206069	0.249425	0.307704	0.274839	0.238107	0.197821	0.252281	0.273926	0.223672	0.203038	0.201794	0.243878	0.328475	0.374988	0.247119	0.277833	0.362049	0.266949	0.327788	0.317074	0.26857	0.29213	0.238883	0.327768	0.206959	0.222433	0.307174	0.201308	0.172451	0.241263	0.168953	0.180948	0.340163	0.263228	0.219587	0.308388
Neurl3	0.00241464	0.00453035	0.0715743	0.0302446	0	0.00375661	0	0	0.0106913	0.00263575	0.00480092	0.0163995	0.0163088	0.0111191	0	0.0115549	0	0.0502234	0.0140398	0.0116823	0	0.00622856	0.0131825	0.0654187	0.0951351	0.00465715	0.00818455	0.00583738	0.00264324	0.00223172	0	0	0	0.0310829	0.00106727	0.00391617	0	0.00920147	0	0.00249449	0	0	0	0	0	0	0	0.0117404	0.0213665
Arid5a	0.205182	0.51985	0.412801	0.484974	0.151373	0.220477	0.383962	0.305358	0.400896	0.123875	0.144629	0.228872	0.2927	0.291692	0.0448208	0.327793	0.534418	0.516637	0.771228	0.194833	0.264358	0.400831	1.03158	0.818321	0.215156	0.260664	0.451675	0.326377	0.491463	0.13933	0.0845374	0.131745	0.0976621	0.0661007	0.0236941	0.183785	0.369238	0.360742	0.374569	0.0642648	0.281543	0.524145	0.500381	0.408662	0.104647	0.126665	0.157344	0.315669	0.511861
4930403P22Rik	0.0285471	0.0369283	0.0556865	0.0645356	0.0143663	0.0170812	0.0333505	0.0477697	0.0379947	0.00992382	0.0217036	0.0316156	0.0348052	0.0316757	0.0145956	0.0360232	0.0478564	0.0539799	0.0451204	0.0116846	0.039594	0.0562954	0.0580057	0.084643	0.0171885	0.0194087	0.0197411	0.011123	0.0284531	0.00713773	0.00900518	0.0382523	0.0168926	0.00372991	0	0.0237937	0.0346447	0.0506481	0.00954861	0.0107787	0.0314668	0.0102775	0.00374784	0.032976	0.00477011	0	0.019526	0.0111313	0.0138538
Kansl3	0.405248	0.464633	0.553782	0.341997	0.339516	0.437499	0.513785	0.439734	0.395961	0.34263	0.340199	0.318732	0.474622	0.263006	0.321123	0.300201	0.396692	0.491591	0.388999	0.418743	0.285341	0.388215	0.420991	0.324184	0.30217	0.363376	0.419566	0.363641	0.320821	0.345674	0.396414	0.471999	0.48428	0.684046	0.519824	0.400852	0.496551	0.464645	0.361661	0.282701	0.365976	0.467677	0.534492	0.244434	0.26833	0.277563	0.556651	0.626991	0.442191
Fer1l5	0	0	0	0.00814478	0	0	0	0	0	0.00223687	0	0	0	0	0	0	0	0	0	0	0	0	0	0	0	0	0	0	0	0	0	0	0	0	0	0	0	0	0	0	0	0	0.00667289	0	0	0	0	0	0
Lman2l	0.24443	0.24868	0.239588	0.222262	0.298967	0.227989	0.233577	0.211322	0.146647	0.238808	0.167082	0.17509	0.114843	0.116237	0.189281	0.203429	0.131938	0.1125	0.135284	0.193557	0.145746	0.165086	0.175774	0.133384	0.17294	0.194118	0.216307	0.162569	0.123381	0.200415	0.263898	0.324886	0.345485	0.272826	0.307928	0.215373	0.165749	0.144313	0.0874862	0.204224	0.256025	0.238885	0.296735	0.254725	0.286376	0.225481	0.209083	0.254297	0.179468
Cnnm4	0.0473382	0.0127306	0.0448639	0.0386686	0.04124	0.0442643	0.0722608	0.0203644	0.0336756	0.0438034	0.0433555	0.00675837	0.0218003	0.0225115	0.0281155	0.0584482	0.0431884	0.0334993	0.0645669	0.0454988	0.0330649	0.00659276	0.0372715	0.0227098	0.0428983	0.039833	0.0308669	0.0317188	0.0350441	0.0217502	0.0429268	0	0.00846471	0.0216156	0.0435289	0.0450777	0.0554773	0.0121388	0.0370532	0.030949	0.0339391	0.0220771	0.0128942	0.0419975	0.0141911	0.0051208	0.00763571	0.0142591	0.0334044
Cnnm3	0.10497	0.134512	0.123359	0.18857	0.218265	0.0817269	0.128806	0.0775315	0.113371	0.101067	0.071728	0.0916637	0.115238	0.0550437	0.0851461	0.0575554	0.0903629	0.131501	0.103282	0.136412	0.0781652	0.099944	0.087356	0.0835302	0.139763	0.0886749	0.149977	0.0878717	0.111642	0.139272	0.0795071	0.13127	0.198174	0.150917	0.140933	0.0958719	0.0854016	0.107051	0.114497	0.160778	0.162201	0.0994506	0.12934	0.145475	0.0864207	0.177305	0.150951	0.236007	0.139094
Gm38033	0.00621526	0	0	0.00830271	0	0.00234839	0.0179328	0	0.00299967	0.00307933	0.00100946	0.00401089	0.00266652	0.00427314	0.00760325	0.0115061	0.00322725	0	0	0.00508756	0.00573545	0.00576696	0	0.00293645	0.00195294	0.00538151	0	0	0	0.00171181	0	0.0281077	0.0118344	0.00613237	0	0.00211463	0	0	0.0216093	0.00547922	0.0108062	0	0.00524714	0	0	0	0	0	0.00225232
Ankrd23	0.00417278	0.00204158	0.00607679	0	0.00264752	0.00637775	0.00315256	0.00676322	0	0.00608089	0.00264189	0.00207206	0.00187791	0.00401962	0	0.00445934	0	0.00376162	0.010289	0	0.00527584	0.00209739	0.00144269	0.00832847	0	0.00340346	0.00944059	0	0	0	0	0	0	0.0112462	0.00240234	0.0030294	0	0.00565835	0	0	0.00443355	0.00692512	0.00749929	0	0.0019744	0	0	0	0.00334744
Gm42417	0.00955274	0.00196684	0	0.00835431	0	0.00445269	0	0.00586804	0.00292844	0.00324532	0	0.00651903	0.00633766	0.00494462	0	0.00423607	0	0	0.0044375	0.00525762	0.00238714	0.00663483	0	0	0	0.00417022	0.00183666	0	0	0.00360811	0	0	0.00452348	0.0116167	0.00595238	0.00259431	0	0.00714176	0	0	0.00964216	0.0020869	0.00324865	0.00311361	0.00367259	0	0.0242822	0	0.00156719
Ankrd39	0.184025	0.182857	0.27401	0.188581	0.218845	0.201438	0.209709	0.197675	0.143425	0.133607	0.190128	0.100505	0.168822	0.181848	0.179921	0.228628	0.140178	0.15963	0.24001	0.194286	0.156536	0.167022	0.162258	0.125756	0.163606	0.158478	0.147817	0.130925	0.116599	0.164725	0.26603	0.216786	0.218898	0.250221	0.244724	0.182301	0.157398	0.213285	0.14451	0.132426	0.204681	0.160892	0.202171	0.192367	0.155646	0.0707549	0.150837	0.198521	0.167626
Sema4c	0.195322	0.212867	0.268874	0.106438	0.207491	0.151354	0.117366	0.145552	0.153142	0.170654	0.125923	0.130487	0.121327	0.150242	0.162414	0.196604	0.199458	0.278593	0.226466	0.158317	0.163538	0.131538	0.194934	0.201552	0.153963	0.13051	0.113862	0.204584	0.159919	0.139901	0.2143	0.115704	0.238831	0.266901	0.169085	0.129654	0.129563	0.148877	0.0761092	0.16698	0.156195	0.216515	0.0773926	0.110931	0.136775	0.0189741	0.0792713	0.0894655	0.0988142
Fam178b	0.0126641	0.0196558	0.0633787	0.0278502	0.0217497	0.0144029	0.0372458	0.0365359	0.0422761	0.0516519	0.0262483	0.0366324	0.0729193	0.0494708	0.0449283	0.0197299	0.0417676	0.0672317	0.0384933	0.0561243	0.0291285	0.0233995	0.0168781	0.0232771	0.0290478	0.0380549	0.0257275	0.0307279	0.0350422	0.045121	0.0287681	0.0241557	0.0418906	0.0126682	0.026881	0.0200972	0.0316483	0.0529652	0.0378553	0.0322238	0.0143199	0.0232555	0.0672512	0.0647491	0.0517447	0	0.0117579	0.033488	0.00509844
Cox5b	2.31023	2.29009	2.28361	1.66838	2.31133	3.00951	2.62478	2.72328	2.32469	3.19025	2.99548	3.07263	3.11183	3.0639	3.13479	2.25661	1.96558	2.25701	1.68773	2.46392	3.18563	3.26657	2.77167	2.12978	2.84081	2.85276	2.73812	2.64817	2.31145	2.73115	2.76916	2.77005	3.01258	2.10764	2.5353	2.58669	2.32354	2.29752	1.91455	2.4703	4.09971	4.05808	4.08536	3.69584	3.81927	5.07896	4.55043	3.88412	4.70614
Actr1b	0.387001	0.334663	0.375248	0.238362	0.2918	0.423459	0.325224	0.305745	0.222633	0.304694	0.345765	0.312451	0.335232	0.25343	0.296873	0.301246	0.265685	0.291911	0.303274	0.245171	0.364837	0.279758	0.384564	0.267365	0.356412	0.370751	0.397569	0.44547	0.297732	0.34604	0.379298	0.353878	0.225965	0.283805	0.279709	0.353555	0.42197	0.232325	0.31535	0.263472	0.448842	0.352883	0.348254	0.340156	0.35812	0.399825	0.197605	0.335659	0.336253
4933424G06Rik	0.00185491	0	0	0	0	0	0	0.00379811	0	0	0.00427238	0	0.00203198	0	0	0	0	0	0	0	0.0027801	0	0	0.00162044	0.00184949	0	0	0	0.00417084	0	0.0288271	0	0	0	0	0	0.00754758	0	0	0	0	0	0	0	0	0	0	0	0.00484869
Gm33533	0	0	0	0	0	0	0	0	0	0	0	0	0	0	0	0	0	0	0	0	0	0	0	0	0	0	0	0	0	0	0	0	0	0	0	0	0	0	0	0	0	0	0	0	0	0	0	0	0
Zap70	0	0	0	0	0	0	0	0	0	0	0	0	0	0	0	0	0	0	0	0	0	0.00307022	0.00142164	0	0	0	0	0	0	0	0	0	0	0	0	0	0	0	0	0	0	0	0	0	0	0	0	0	0
Tmem131	0.471962	0.412346	0.531625	0.474205	0.511529	0.420854	0.300141	0.414488	0.35906	0.313892	0.510531	0.388642	0.421289	0.363129	0.445081	0.406688	0.388352	0.44221	0.435407	0.409536	0.452288	0.34286	0.417548	0.514726	0.403786	0.475506	0.327794	0.475164	0.432573	0.456523	0.551899	0.377593	0.264435	0.509552	0.508606	0.418462	0.428135	0.406715	0.459166	0.462745	0.475693	0.394511	0.423107	0.404427	0.314786	0.515059	0.261626	0.433148	0.352856
Vwa3b	0	0.00409693	0.00986208	0	0.0030424	0.00264702	0.00649199	0.0118875	0.00186374	0	0.00817247	0.003604	0.00203198	0.00205863	0	0	0.00612666	0.0054099	0.00851271	0.00462165	0.00221816	0	0.00427917	0.00892007	0.00250086	0	0	0	0	0.00322924	0	0.00488651	0	0	0.00463903	0.00362489	0	0.0118225	0	0	0.00507988	0	0.00414182	0.0206325	0.00308019	0.00345975	0	0.00506663	0
Gm37020	0	0	0	0	0	0	0	0	0	0	0	0	0	0	0	0	0	0	0	0	0	0	0	0	0	0	0	0	0	0	0	0	0	0	0	0	0	0	0	0	0	0	0	0	0	0	0	0	0
Cnga3	0	0	0	0	0	0	0	0	0	0	0	0	0	0	0	0	0	0	0	0	0	0	0	0	0	0	0	0	0	0	0	0	0	0	0	0	0	0	0	0	0	0	0	0	0	0	0	0	0
Inpp4a	0.179446	0.0918341	0.0885425	0.176102	0.116531	0.174335	0.0718441	0.0789259	0.107548	0.0622902	0.0780806	0.0389873	0.0286386	0.0544065	0.0346477	0.0969171	0.0851744	0.0605169	0.124203	0.0476755	0.0816727	0.04338	0.0330194	0.0477233	0.0463365	0.0918902	0.0550413	0.0652087	0.0557667	0.0620198	0.108339	0.04265	0.0290216	0.149455	0.0759185	0.117361	0.0738177	0.0478193	0.0856379	0.0745224	0.275359	0.161167	0.113363	0.129469	0.0550896	0.0255013	0.0667459	0.0566444	0.0592985
4930439A04Rik	0	0	0	0	0	0	0	0	0	0	0	0	0	0	0	0	0	0	0	0	0	0	0	0	0	0	0	0	0	0	0	0	0	0	0	0	0	0	0	0	0	0	0	0	0	0	0	0	0
Coa5	0.152193	0.11777	0.0969416	0.13366	0.177296	0.11482	0.114569	0.100001	0.104797	0.152672	0.125391	0.0807933	0.124497	0.140314	0.165941	0.118234	0.135245	0.115932	0.137786	0.164725	0.124169	0.120441	0.141452	0.119011	0.150225	0.1099	0.11749	0.085138	0.184721	0.175054	0.220309	0.174484	0.200045	0.116585	0.139566	0.134509	0.0761575	0.0553712	0.101714	0.166375	0.162635	0.0682686	0.116114	0.139635	0.0826376	0.132791	0.111462	0.171744	0.248799
Unc50	0.44266	0.204515	0.124575	0.415969	0.598642	0.368811	0.11247	0.13653	0.303911	0.509238	0.36536	0.174752	0.141686	0.292657	0.44129	0.359756	0.135107	0.105495	0.280459	0.587336	0.338948	0.132637	0.179376	0.446984	0.509282	0.385072	0.162514	0.219444	0.399287	0.567867	0.52193	0.273297	0.163357	0.348961	0.639783	0.328354	0.166899	0.138628	0.321797	0.512082	0.363659	0.130678	0.139172	0.360589	0.513384	0.332987	0.104238	0.101691	0.313458
Mgat4a	0.0817964	0.129516	0.123976	0.209516	0.1572	0.0289411	0.0196026	0.0205407	0.0316972	0.00748698	0.0111543	0.00933887	0.0111282	0.00915657	0.0256387	0.0116999	0.0263398	0.0344782	0.0222838	0.0167528	0.0145158	0.020488	0.0373979	0.0284592	0.0244245	0.0247308	0.0350841	0.0199215	0.0193725	0.0160766	0.0400104	0	0.0372788	0.0176737	0.0298601	0.0178648	0.0409911	0.0287335	0.00556674	0.0303483	0.0539993	0.0552292	0.0442872	0.0209085	0.022519	0.00798901	0.0205494	0.0265793	0.0181466
2010300C02Rik	0	0.00372875	0	0	0	0	0	0	0	0	0	0	0	0	0	0.00290833	0	0	0	0	0	0	0	0	0	0	0	0	0	0	0	0	0	0	0	0	0	0	0	0	0.00253784	0	0.0050844	0	0	0	0	0.00356247	0.00463274
4930556I23Rik	0	0	0	0	0	0	0	0	0	0	0	0	0	0	0	0	0	0	0	0	0	0	0	0	0	0	0	0	0	0	0	0	0	0	0	0	0	0	0	0	0	0	0	0	0	0	0	0	0
Tsga10	0.0801805	0.0623214	0.0867514	0.0573944	0.0946809	0.0442897	0.0742028	0.0502944	0.0807584	0.0774742	0.0554843	0.0549115	0.0678091	0.0552747	0.0482774	0.0800849	0.120415	0.0788096	0.0862458	0.0872511	0.0420576	0.0534905	0.0571564	0.0640154	0.0710181	0.0786601	0.0848323	0.0620363	0.0806583	0.0891454	0.139971	0.0262141	0.0546438	0.0908603	0.105394	0.0445112	0.0427083	0.0288337	0.0872027	0.0703769	0.0569244	0.0359639	0.0296184	0.0624271	0.0559757	0.034691	0.0380761	0.0648389	0.0554897
Gm26805	0	0	0	0	0	0	0	0	0	0	0	0	0	0	0	0	0	0	0	0	0	0	0	0	0	0	0	0	0	0	0	0	0	0	0	0	0	0	0.00830321	0	0	0	0	0	0	0	0	0	0
Lipt1	0.0103762	0.00244529	0.0184184	0.0297924	0.0233175	0.00464317	0.019119	0.0162327	0.0330579	0.0361818	0.0187697	0.0105954	0.0260315	0.0247889	0.0294621	0.00975541	0.0232067	0.0215099	0.0242315	0.0137494	0.0216531	0.0063132	0.0115112	0.0137998	0.0163485	0.00804239	0.0162943	0.0216555	0.0142065	0.0284403	0.00708633	0.0182003	0.0119375	0.0429448	0.035755	0.0235483	0.0165297	0.00456466	0.0167139	0.0114039	0.0210587	0.0172849	0.0276749	0.0246245	0.0296848	0.0362443	0.0424182	0.0422546	0.0365025
Mitd1	0.115918	0.125534	0.168255	0.177834	0.205095	0.0941726	0.102464	0.0735826	0.0805275	0.135752	0.106589	0.0965092	0.136053	0.122295	0.220213	0.114015	0.0768232	0.144478	0.144639	0.18628	0.131044	0.082814	0.196408	0.152857	0.213345	0.133054	0.0968897	0.117365	0.133321	0.207465	0.121031	0.22255	0.122127	0.144907	0.1432	0.0763772	0.0764824	0.0586614	0.0945674	0.121749	0.0887473	0.114784	0.111701	0.100488	0.151928	0.118617	0.0839603	0.114711	0.152798
Mrpl30	1.21112	1.41955	1.88325	1.61458	1.41356	1.36094	1.65615	1.87517	1.73241	1.47279	1.57035	1.78804	2.22587	1.88031	1.77138	1.39668	1.42459	2.01693	1.46858	1.49181	1.53014	1.89917	1.92498	1.68652	1.56647	1.46845	1.59829	1.68007	1.51924	1.54833	1.48136	1.87521	1.65537	1.50916	1.67413	1.37382	1.56102	1.98131	1.6312	1.49034	1.56777	1.63199	1.85517	1.75099	1.67172	1.42383	1.84729	1.94777	1.73964
Lyg2	0	0	0	0	0	0	0	0	0	0	0	0	0	0	0	0	0	0	0	0	0	0	0	0	0	0	0	0	0	0	0	0	0	0	0	0	0	0	0	0	0	0	0	0	0	0	0	0	0
Gm15457	0	0	0	0	0	0	0	0	0	0	0	0	0	0	0	0	0	0	0	0	0	0	0	0	0	0	0	0	0	0	0	0	0	0	0	0	0	0	0	0	0	0	0	0	0	0	0	0	0
Lyg1	0	0	0	0	0	0	0	0	0	0	0	0	0	0	0	0	0	0	0	0	0	0	0	0	0	0	0	0	0	0	0	0	0	0	0	0	0	0	0	0	0	0	0	0	0	0	0	0	0
Txndc9	0.762172	0.590944	0.802021	0.587004	0.847397	0.862347	0.648754	0.815995	0.759736	0.859932	0.831584	0.77336	0.84148	0.842769	0.884327	0.891873	0.653116	0.778899	0.677788	0.904864	0.878378	0.782846	0.736376	0.704318	0.834047	0.843362	0.818188	0.794015	0.729659	0.894459	1.02439	0.883934	0.952378	0.840609	0.826468	0.697761	0.619241	0.74974	0.744827	0.782443	0.905439	0.875414	0.82658	0.733299	0.865249	0.981728	0.862118	0.859285	0.690747
Eif5b	1.95265	2.08554	1.95552	1.59476	2.10792	2.10539	2.02654	1.77074	1.81139	2.20173	1.89645	1.87028	1.74529	1.64838	2.11884	1.99035	1.62094	1.80559	1.64406	1.89482	1.83749	1.73044	1.61929	1.45316	1.90032	1.9737	2.21007	1.67746	1.56764	1.98348	2.46066	2.29944	1.85911	1.99669	2.23935	1.91854	2.0466	1.86997	1.96714	2.23309	2.4857	2.49044	1.79007	1.81159	2.08744	2.0111	1.74925	2.01532	2.03326
Rev1	0.260587	0.322518	0.219082	0.183215	0.242333	0.234891	0.211983	0.205494	0.219835	0.225824	0.185982	0.265467	0.173856	0.204039	0.217286	0.209233	0.305972	0.201867	0.288198	0.161301	0.19633	0.21721	0.208427	0.238035	0.182108	0.213549	0.283338	0.168114	0.263773	0.209486	0.257725	0.163903	0.20417	0.302948	0.197635	0.271301	0.264031	0.271806	0.194711	0.266349	0.265736	0.210101	0.240767	0.195764	0.175246	0.308179	0.240617	0.289207	0.285779
Gm5099	0.00130406	0	0	0.0112611	0	0	0	0	0	0	0	0	0	0	0	0	0	0	0	0	0	0	0	0.00155432	0	0	0	0	0	0	0	0	0	0	0	0	0	0	0.00830321	0	0	0	0	0	0	0	0	0	0
Aff3	0.519376	0.553488	0.491655	0.33363	0.379743	0.350637	0.380233	0.449763	0.232142	0.241818	0.489518	0.495214	0.595079	0.41287	0.440374	0.294094	0.234621	0.365632	0.354189	0.252567	0.647952	0.573186	0.87954	0.655976	0.489784	0.291207	0.239342	0.293615	0.111757	0.156469	0.357072	0.388915	0.399327	0.259291	0.259502	0.329986	0.438325	0.485314	0.536077	0.313941	0.219292	0.304839	0.302598	0.161617	0.189898	0.22885	0.054674	0.107073	0.0235558
Gm16150	0	0	0.00631206	0	0.00260976	0	0.00360924	0.00362469	0	0	0	0	0.00422686	0	0	0	0.0026691	0	0	0.00222843	0	0.00670026	0.0102941	0.0100141	0	0	0.00499446	0	0	0	0	0	0	0	0	0	0.00599878	0	0	0	0	0	0.00335683	0	0	0	0	0	0
Gm16151	0	0	0	0	0	0	0	0	0	0.00149913	0.00119988	0	0	0	0	0	0	0	0	0	0	0	0	0.00249203	0	0	0	0	0	0	0	0	0	0	0	0	0	0	0	0	0	0	0	0	0	0	0	0	0
Gm16152	0.208149	0.437082	0.332784	0.167792	0.169183	0.118038	0.344687	0.104316	0.108019	0.101731	0.170441	0.269305	0.295554	0.199152	0.127521	0.0628152	0.206354	0.231998	0.149738	0.0519661	0.255791	0.30009	0.429425	0.362249	0.13315	0.0758369	0.147619	0.0641877	0.0949953	0.0424513	0.267645	0.189831	0.275317	0.163913	0.15528	0.148449	0.324941	0.277546	0.129972	0.0691384	0.0630337	0.226192	0.12469	0.118678	0.0608332	0.092034	0.0255648	0.019469	0.0089545
Lonrf2	0.0269163	0.0345898	0.00811731	0.00897012	0.0301463	0.0273853	0.012876	0.0148779	0.00149038	0.023009	0.0407783	0.0363085	0.0492508	0.0215118	0.0387442	0.0340612	0.0184369	0.00422611	0	0.00419788	0.00940462	0.0165251	0.0155146	0.00309127	0.0147263	0.0239702	0.0195629	0	0.00928233	0.019495	0.019463	0.0190772	0.0101646	0	0.0257351	0.0242175	0.0216236	0.0139276	0	0.0126401	0.0458337	0.010711	0.0173699	0.0154785	0.0208223	0.0360345	0.00788351	0.00719994	0.00220899
Chst10	0.0131165	0.0212486	0.0219771	0.0165585	0.0160168	0.0095576	0.00632138	0.00452796	0.00548499	0.00316717	0.00270758	0.0149382	0	0.00880862	0.00660822	0.0187301	0.0140334	0.00779292	0.0120357	0.00382375	0.0146838	0.0236223	0.00306305	0	0.00476546	0.00590905	0.00389532	0	0.00355669	0.00397717	0	0	0	0	0.00912688	0.00586692	0.00816446	0.0105586	0	0.0217159	0.0165816	0.00393425	0.00438404	0	0.0056205	0.00744912	0.00696507	0.00525304	0.000889904
Gm37707	0	0	0	0	0	0	0	0	0	0	0	0	0	0	0	0	0	0	0	0	0	0	0	0	0	0	0	0	0	0	0	0	0	0	0	0	0	0	0	0	0	0	0	0	0	0	0	0	0
Nms	0	0	0	0	0	0	0	0	0	0	0	0	0	0	0	0	0	0	0	0	0	0	0	0	0	0	0	0	0	0	0	0	0	0	0	0	0	0	0	0	0	0	0	0	0	0	0	0	0
Pdcl3	0.589403	0.352462	0.326281	0.749696	0.804311	0.70403	0.46218	0.426183	0.901424	1.00719	0.654495	0.32308	0.291924	0.51391	0.684116	0.551179	0.314403	0.303416	0.693203	0.828995	0.619241	0.302017	0.360515	0.554944	0.757075	0.647672	0.414812	0.296254	0.704194	0.861565	0.555704	0.472556	0.364827	0.602575	0.741303	0.526603	0.352887	0.269224	0.512539	0.731716	1.31448	0.50427	0.603178	1.29813	1.31087	0.912528	0.198927	0.256546	0.507348
Gm37821	0	0	0	0	0	0	0	0	0	0	0	0	0	0	0	0	0	0	0	0	0	0	0	0	0	0	0	0	0	0	0	0	0	0	0	0	0	0	0	0	0	0	0	0	0	0	0	0	0
Npas2	0.00196818	0.0039684	0.00706382	0	0	0.0228924	0	0	0.0183048	0.00198044	0.00116262	0	0	0.00294308	0	0.00917732	0	0.00414489	0.00599751	0	0.00204172	0	0	0.00432989	0.00158788	0.0040163	0	0.00387018	0	0.00295925	0.00656934	0	0	0.0233092	0	0.0101129	0.00500643	0	0.00944473	0	0.0418959	0	0.00395319	0.00588358	0.00861188	0.0351988	0	0.00476034	0.0318697
Rpl31	7.24568	8.99985	8.9584	7.27406	8.42103	7.60529	9.92484	8.73355	6.68885	8.18279	9.01547	12.5656	10.7064	9.7039	10.4808	7.60543	9.89992	8.9015	7.04383	7.64342	8.84186	12.3849	9.25988	7.72559	9.43354	7.91718	10.383	9.61136	7.18151	8.60994	7.25205	10.8302	8.85401	7.02507	8.75621	8.1152	10.5461	9.2059	7.42678	8.93373	6.87506	9.3783	8.16667	6.94808	8.11726	8.35522	11.1304	9.0426	6.60407
Tbc1d8	0.0221346	0.0398418	0.022221	0	0.0136515	0.00327432	0.016307	0.00525343	0.00636136	0.00991291	0.0102499	0.0101182	0.00848744	0.013791	0.00281076	0.0108122	0.00961685	0.0167366	0.0404959	0.005337	0.0172224	0.0164317	0.00781328	0	0.0125485	0.0160408	0.009535	0.00450521	0.00653134	0	0.00249651	0.0132854	0.047677	0.0104869	0.0165062	0.0179553	0	0.00513259	0.00840304	0.0138376	0.0041302	0.00622228	0.00408697	0	0	0.0486624	0.00956014	0.0144505	0.0716948
Cnot11	0.144016	0.0906046	0.142932	0.154211	0.108526	0.14964	0.133763	0.0781944	0.122717	0.160697	0.177457	0.136677	0.189945	0.150684	0.161165	0.140642	0.0965126	0.210964	0.0859039	0.187093	0.186087	0.14509	0.191274	0.105568	0.16616	0.145277	0.130439	0.0961778	0.0926142	0.13941	0.116656	0.147133	0.187143	0.167382	0.200816	0.12307	0.0984009	0.128265	0.0802301	0.120909	0.197828	0.152003	0.0928423	0.190176	0.163236	0.608756	0.163741	0.127834	0.119647
Rnf149	0.481591	0.461197	0.434718	0.365044	0.394266	0.489111	0.431712	0.408676	0.348641	0.362258	0.38928	0.399849	0.418581	0.37802	0.498593	0.385622	0.418237	0.467695	0.300358	0.345165	0.421481	0.439906	0.473206	0.361442	0.427784	0.40258	0.409906	0.322127	0.393465	0.402247	0.470731	0.566092	0.514085	0.314155	0.360533	0.528586	0.509429	0.447525	0.305967	0.406614	0.43651	0.404114	0.454309	0.318992	0.243616	0.533596	0.433995	0.446864	0.439993
Creg2	0.00142234	0.0220035	0.0564269	0.0324402	0.0505453	0.0119661	0.0105466	0.0314762	0.00594567	0.0100724	0.00115826	0	0.00371458	0	0	0.00458994	0	0.00746228	0	0	0	0	0.0030454	0	0.00387572	0	0.00498512	0	0	0.0173026	0	0.00692389	0	0.0100717	0.0160041	0.00687734	0.0188084	0	0.0119555	0.0163665	0.0108073	0.0374005	0.022216	0.0370189	0.00733761	0	0	0	0.000918026
D930019O06Rik	0	0	0	0	0	0	0	0	0	0	0	0	0	0	0	0	0	0	0	0	0	0	0	0	0	0	0	0	0	0	0	0	0	0	0	0	0	0	0	0	0	0	0	0	0.00183589	0	0	0	0
Rfx8	0.00234827	0	0	0	0.00313721	0.00271014	0	0	0	0	0.00384769	0	0	0	0.00314179	0.00273149	0	0	0	0	0.00184048	0	0	0	0	0	0	0.00540877	0	0.010859	0	0	0	0	0.00176501	0.00272033	0	0	0	0	0	0	0	0	0	0	0.00635655	0.00323029	0.00308883
Gm3646	0	0	0	0	0	0	0	0	0	0	0	0	0	0.00205558	0	0	0	0	0	0	0	0	0	0	0	0	0	0	0	0	0	0	0	0	0	0	0	0	0	0	0	0	0	0	0	0	0.0056554	0	0.00270678
1700066B17Rik	0.00120518	0	0	0	0	0	0	0	0	0	0.00231383	0.00404137	0.00252817	0	0	0	0	0.0131448	0.00398048	0	0	0	0	0	0	0	0	0	0	0	0	0	0	0	0	0	0	0.00794807	0	0	0	0	0	0	0	0	0.0056554	0.0144054	0.00125409
Map4k4	1.922	1.91769	1.55614	1.49122	1.0329	1.42104	1.7871	1.60728	1.30693	1.13751	1.36118	1.35487	1.28037	1.19978	1.16874	1.55718	1.94946	1.91806	1.69515	1.32978	1.25663	1.51427	1.79707	1.54141	1.28406	1.61365	1.49817	1.56097	1.37059	1.03412	2.23509	1.6063	2.20426	1.79644	1.3613	1.60268	1.97526	1.68243	1.51697	1.20282	1.16236	1.3795	1.17366	0.95466	0.706163	1.66147	1.51033	2.16468	1.62977
Il1r2	0.00372346	0	0.0137681	0	0	0.00223911	0.00279566	0.0111479	0.00123939	0	0.00325124	0.00833334	0.0102998	0.00940546	0.0038951	0	0.0120482	0.0426144	0.0269621	0.0119279	0.0454308	0.0552452	0.183939	0.107229	0.0523133	0.00834233	0.00527461	0	0.00233898	0	0	0	0	0	0	0.0022102	0	0.0369807	0.00820179	0	0	0	0	0	0	0.0320364	0.0149798	0.0280288	0.0278134
Gm16894	0.00133681	0	0	0	0	0	0	0.00367087	0	0.000669093	0.00290942	0	0.00256771	0	0	0.00922939	0	0	0	0.00221086	0	0.00190518	0	0	0	0	0	0	0	0	0.00249651	0	0	0	0.00352362	0	0	0	0	0.00247049	0	0	0	0	0	0.0850164	0.0477664	0.032707	0.0392062
Il1r1	0.133863	0.122549	0.166421	0.201239	0.160322	0.0894591	0.107701	0.0806192	0.0615379	0.084468	0.155371	0.0864264	0.124175	0.165432	0.0905265	0.118876	0.101214	0.1864	0.178738	0.146108	0.289273	0.27472	0.531448	0.459382	0.451643	0.116873	0.178588	0.16764	0.169547	0.142624	0.0648782	0.0967312	0.0982947	0.236764	0.142522	0.0876612	0.103005	0.0549891	0.168595	0.0852478	0.0558789	0.0586755	0.0335216	0.0604747	0.0410987	0.473989	0.292231	0.603238	0.857305
Il1rl2	0.110196	0.0215832	0.0305714	0.0582692	0.0703932	0.0168252	0.0136833	0.00628609	0.0347097	0.0199872	0.067277	0.0200712	0.0580152	0.036172	0.0527034	0.0675835	0.0159426	0.0416431	0.0453992	0.0518611	0.1253	0.0389643	0.102346	0.156351	0.196043	0.0404568	0.022466	0.0480199	0.0784448	0.0342269	0.0535175	0.0544786	0.0133581	0.111733	0.039414	0.0344109	0.00411626	0.0245862	0.0268686	0.0242355	0.00594585	0.00692512	0.00995823	0.00444885	0.0135644	0.0323564	0.026949	0.00817235	0.0297219
Il1rl1	0	0	0	0	0	0.0172753	0	0	0	0	0	0	0	0	0	0.00390918	0	0	0	0	0	0	0	0	0	0.0108667	0	0	0	0	0	0	0	0	0	0	0	0	0	0	0	0	0	0	0	0	0	0	0
Il18r1	0	0	0	0	0	0	0	0	0	0	0	0	0	0	0	0	0	0	0	0	0	0	0	0	0	0	0	0	0	0	0	0.00848194	0	0	0	0	0	0	0	0	0	0	0	0	0	0	0	0.00492824	0
Il18rap	0	0	0	0	0	0	0	0	0	0	0	0.00148215	0	0	0	0	0	0	0	0.00197802	0	0	0	0	0	0	0	0	0	0	0	0	0	0	0	0	0	0	0	0	0	0	0	0	0	0	0	0	0
Gm35801	0	0	0	0	0	0	0	0	0	0	0	0	0	0	0	0	0	0	0	0	0	0	0	0	0	0	0	0	0	0	0	0	0	0	0	0	0	0	0	0	0	0	0	0	0	0	0	0	0
Slc9a4	0	0	0	0	0	0	0	0	0	0.000947718	0	0	0.00342898	0	0	0	0	0	0	0	0	0	0	0	0	0	0	0	0	0	0	0	0.0128284	0	0	0	0	0	0	0	0	0	0	0	0	0	0	0	0
Slc9a2	0	0	0	0	0.00334944	0	0	0	0	0.00099011	0	0	0	0	0	0	0	0	0	0	0	0	0	0	0	0	0	0	0	0	0.00466986	0	0	0	0	0	0	0	0	0	0	0	0.00502968	0	0	0	0	0	0.00073306
Gm37623	0	0	0	0	0	0	0	0	0	0	0	0	0	0	0	0	0	0	0	0	0	0	0	0	0	0	0	0	0	0	0	0	0	0	0	0	0	0	0	0	0	0	0	0	0	0	0	0	0
Gm37915	0	0	0	0	0	0	0	0	0	0	0	0	0	0	0	0	0	0	0	0	0	0	0	0	0	0	0	0	0	0	0	0	0	0	0	0	0	0	0	0	0	0	0	0	0	0	0	0	0
Mfsd9	0.00363444	0.0033016	0.0141452	0.00733919	0.0115426	0.00553613	0.00291201	0	0.00200305	0.0134961	0.00561341	0.00379361	0.00543666	0.0075222	0.00635751	0.00697954	0.00405409	0.00453882	0.00399942	0.00492977	0.00475947	0.0114578	0.00926962	0.00224464	0.00179175	0.00837198	0.00422335	0.00574754	0.00233898	0.0061054	0.0216584	0	0.00670313	0.00720976	0.0164161	0.00209731	0.00345515	0.00952979	0	0.0130311	0.00224484	0	0	0.00673426	0.00326108	0	0.00885969	0	0.0122346
Tmem182	0.0020081	0	0	0	0	0	0	0	0	0	0	0	0	0	0	0	0	0	0.00399942	0	0	0	0.00254057	0	0	0	0	0	0	0	0	0	0	0	0	0	0	0	0	0	0	0	0	0	0	0	0	0	0
4930448I06Rik	0	0	0	0	0	0	0	0	0	0	0	0	0	0	0	0	0	0	0	0	0	0	0	0	0	0	0	0	0	0	0	0	0	0	0	0	0	0	0	0	0	0	0	0	0	0	0	0	0
Gm28634	0	0	0	0	0	0	0	0	0	0	0	0	0	0	0	0	0	0	0	0	0	0	0	0	0	0	0	0	0	0	0	0	0	0	0	0	0	0	0	0	0	0	0	0	0	0	0	0	0
Gm29260	0	0	0	0	0	0	0	0	0	0	0	0	0	0	0	0	0	0	0	0	0	0	0	0	0	0	0	0	0	0	0	0	0	0	0	0	0	0	0	0	0	0	0	0	0	0	0	0	0
Gm9915	0	0	0	0	0	0	0	0	0	0	0	0	0	0	0	0	0	0	0	0	0	0	0	0	0	0	0	0	0	0	0	0	0	0	0	0	0	0	0	0	0	0	0	0	0	0	0	0	0
Gm29664	0	0	0	0	0	0	0	0	0	0	0	0	0	0	0	0	0	0	0	0	0	0	0	0	0	0	0	0	0	0	0	0	0	0	0	0	0	0	0	0	0	0	0	0	0	0	0	0	0
Gm28175	0	0	0	0	0	0	0	0	0	0	0	0	0	0	0	0	0	0	0	0	0	0	0	0	0	0	0	0	0	0.00164635	0	0	0	0	0	0	0	0	0	0	0	0	0	0	0	0	0	0	0
Gm28140	0	0	0	0	0	0	0	0	0	0	0	0	0	0	0	0	0	0	0	0	0	0	0	0	0	0	0	0	0	0	0	0	0	0	0	0	0	0	0	0	0	0	0	0	0	0	0	0	0
Pantr1	0	0	0	0	0	0	0	0	0	0	0	0	0	0	0	0	0	0	0	0	0	0	0	0	0	0	0	0	0	0	0	0	0	0	0	0	0	0	0	0	0	0	0	0	0	0	0	0	0
Pou3f3	0.00386377	0	0	0	0	0	0	0	0	0	0	0	0	0	0	0	0	0	0	0	0	0	0	0	0	0	0	0	0	0	0	0	0	0	0	0	0	0	0	0	0	0	0	0	0	0	0	0	0.000995035
Dalir	0	0	0	0	0	0	0	0	0	0	0	0	0	0	0	0	0	0	0	0	0	0	0	0	0	0	0	0	0	0	0	0	0	0	0	0	0	0	0	0	0	0	0	0	0	0	0	0	0
Mrps9	0.371729	0.333967	0.285793	0.326742	0.324142	0.395617	0.274786	0.414942	0.420897	0.424342	0.31778	0.303387	0.369784	0.386941	0.418144	0.409176	0.239059	0.490934	0.378249	0.374959	0.299694	0.3501	0.438101	0.315075	0.360885	0.339958	0.288645	0.379674	0.336996	0.422076	0.444193	0.292132	0.532641	0.411054	0.404709	0.299288	0.312708	0.334997	0.361811	0.305976	0.290354	0.334247	0.43529	0.429013	0.409818	0.611344	0.487069	0.607993	0.53176
Gpr45	0.00808453	0.00343289	0	0	0.00938483	0.0105312	0.00283947	0	0.00594536	0.00405306	0.0221615	0.013575	0.00985474	0.0184747	0.00811953	0.0175649	0.00458964	0.00881353	0.0228286	0.00453959	0.0182314	0.00307022	0.00236885	0.0123222	0.00783128	0.00501957	0.00221934	0	0.00950639	0.00872665	0.00569035	0.0105216	0	0	0.00213084	0.00613563	0.00394666	0.0268251	0.0195183	0.00304084	0.00369475	0	0.00630835	0	0.0105974	0	0	0	0.00121109
Tgfbrap1	0.118729	0.083129	0.0911223	0.105978	0.105218	0.109682	0.0779855	0.0710151	0.0807899	0.113238	0.11628	0.0475689	0.07684	0.0950288	0.105546	0.0932728	0.0856108	0.099039	0.121231	0.112651	0.0904589	0.0565083	0.0677963	0.0695276	0.0845272	0.084343	0.0713746	0.0586107	0.0601797	0.099709	0.059553	0.103476	0.129058	0.104837	0.14692	0.0791775	0.120849	0.0478148	0.0284015	0.114402	0.114149	0.0576795	0.111718	0.0770053	0.111349	0.0620821	0.0823145	0.0973378	0.101924
Gm28782	0	0	0	0	0	0	0	0	0	0	0	0	0	0	0	0	0	0	0	0	0	0	0	0	0	0	0	0	0	0	0	0	0	0	0	0	0	0	0	0	0	0	0	0	0	0	0	0	0
8430432A02Rik	0	0	0	0.0149321	0.00531593	0	0.00258773	0	0	0.00167112	0.00403467	0.00217965	0	0	0.00375903	0	0	0	0.0130298	0	0	0	0.00138651	0	0	0.00199957	0.00474091	0	0.00700133	0.005242	0.00811688	0	0	0	0.00971698	0.00201193	0	0	0	0	0	0	0	0	0.00410248	0	0	0.00735443	0.00379178
AI597479	0.0780541	0.100224	0.0812243	0.106636	0.130115	0.0652945	0.0373288	0.0587608	0.0779748	0.0849142	0.0852762	0.0826401	0.0523557	0.0678293	0.118205	0.0750727	0.0583397	0.0643591	0.0889946	0.0943533	0.0726322	0.0709218	0.0849236	0.0785667	0.0918407	0.0633533	0.0780937	0.0735242	0.114391	0.0869218	0.119002	0.0247895	0.071069	0.10307	0.111219	0.0591955	0.0588985	0.0380058	0.0724059	0.0547182	0.0684427	0.0621522	0.0569459	0.126299	0.0901349	0.0588438	0.134215	0.0888	0.0487861
Fhl2	1.98484	0.953418	1.46123	1.05365	0.981097	1.47797	1.28328	1.7983	1.53291	1.61152	1.29708	1.27472	1.80754	1.686	1.79736	1.12868	1.04131	1.72011	1.21512	1.47528	1.43693	1.32478	2.5359	2.21808	2.63367	1.26819	0.799595	1.22274	0.881412	0.885792	1.82273	1.04786	1.34102	1.14876	0.949299	0.955548	0.625376	1.04505	0.832769	0.627015	2.136	1.71792	2.30829	2.20854	2.37863	0.129127	0.258892	0.426628	0.157324
Gm29040	0.00156993	0.00361551	0.00764449	0	0	0	0	0	0	0	0	0	0.00232385	0	0.00584934	0	0	0.00550079	0	0.00111281	0.00208386	0	0	0.00513189	0.00413761	0.0024726	0.00268775	0	0	0	0	0	0	0	0.00323078	0	0	0.00870376	0	0	0	0	0	0	0	0	0	0	0
Nck2	0.289337	0.118966	0.15274	0.215631	0.140432	0.235869	0.137606	0.111718	0.162481	0.140433	0.126238	0.0977186	0.0693079	0.0817773	0.137476	0.240004	0.114959	0.0473736	0.110565	0.127489	0.14311	0.0985636	0.149823	0.166172	0.217542	0.319292	0.135725	0.143377	0.183174	0.165195	0.276726	0.187212	0.0584093	0.14175	0.154639	0.23411	0.114121	0.142665	0.157161	0.102643	0.304237	0.0909559	0.112564	0.14352	0.158655	0.145898	0.0400796	0.0638578	0.0843317
1500015O10Rik	0.163005	0.144156	0.186758	0.0486069	0.162963	0.252837	0.283691	0.295757	0.280637	0.305799	0.0425211	0.0502123	0.0305742	0.0362121	0.0319303	0.0418243	0.0620439	0.0140138	0.0167792	0.0398896	0.0251377	0.0168418	0.0454286	0.0351043	0.0443105	0.135834	0.0795331	0.102312	0.0478011	0.0696798	0.0580773	0.0250131	0.112549	0.0430396	0.0823283	0.0693139	0.0534319	0.0736812	0.0342058	0.0620417	0.569798	0.522079	0.699456	0.493536	0.645479	0.0673662	0.0253546	0.01232	0.0538195
Gm29155	0	0	0	0	0	0	0	0	0	0	0.00128126	0.00245276	0	0.00315159	0	0	0.0103992	0	0.00479253	0	0.00219684	0	0	0	0	0	0	0	0	0	0	0	0	0	0	0	0	0	0	0.00284785	0.00374925	0	0	0	0	0	0	0	0
Gm29157	0.00375584	0	0	0.00693836	0	0	0	0.00297978	0	0	0	0	0	0	0	0	0	0	0	0	0	0	0	0	0	0	0	0	0	0	0	0.00882243	0	0	0.00186717	0	0	0	0.00977915	0	0.00745995	0	0.00749513	0.0021815	0	0	0	0	0
Gm29156	0	0	0	0	0	0	0	0	0	0	0	0	0	0	0.0033566	0	0	0	0	0	0	0	0	0.00320766	0	0	0	0	0	0	0	0.00662449	0	0	0	0	0	0	0	0	0.00334608	0	0	0	0	0	0	0	0
Uxs1	0.204662	0.20032	0.178	0.155667	0.192087	0.160595	0.178243	0.132305	0.107978	0.0977322	0.150488	0.184342	0.174875	0.161977	0.143431	0.114218	0.172735	0.109814	0.0747593	0.114835	0.232382	0.197553	0.135111	0.135186	0.1563	0.24705	0.132051	0.125957	0.150417	0.228896	0.233576	0.190353	0.099249	0.0995797	0.212736	0.188038	0.113674	0.100105	0.0978549	0.171377	0.263387	0.261285	0.11817	0.141405	0.168632	0.226918	0.168627	0.152941	0.270831
Tpp2	0.751466	0.61006	0.629762	0.593738	0.502012	0.715866	0.584285	0.429929	0.428907	0.396018	0.741893	0.531802	0.689609	0.650629	0.610646	0.708943	0.540518	0.549885	0.620513	0.452651	0.815181	0.783469	0.849757	1.02945	0.736533	0.775424	0.611504	0.636941	0.503872	0.59664	0.64705	0.470365	0.466451	0.3674	0.519065	0.799818	0.605932	0.602128	0.769378	0.51202	0.553133	0.419699	0.400719	0.391266	0.297804	1.51496	1.22862	1.28084	1.58696
Mettl21c	0.0105957	0.0165128	0.010087	0	0.00584603	0.00838905	0.00657756	0.0221254	0.00683481	0	0.00668805	0.0299512	0.0146076	0.00778849	0.00979935	0.00632523	0.0124069	0.00254414	0	0.00197802	0.0176959	0.0538977	0.0337355	0.0345542	0.0067211	0.0217761	0.00630573	0.00873067	0.00679665	0	0.0217135	0	0.0311307	0.00392702	0	0.0159802	0.0224474	0	0.025652	0	0.00940105	0	0.00951352	0.0030466	0.00548751	0	0.0223024	0.0135066	0.0132075
Gm8251	0.0687667	0.0435241	0.00921332	0	0.00319505	0.0410413	0.0603165	0.0345726	0.0225691	0.00339484	0.0314453	0.0497885	0.0482013	0.0868524	0	0.0384778	0.0691386	0.0515201	0.0326864	0.00407309	0.115256	0.0785969	0.0494585	0.054492	0.00271276	0.062593	0.037732	0.0129552	0.034409	0.0111687	0.01125	0.021925	0.0273987	0.00562713	0	0.0302115	0.0395216	0.0548348	0.0734173	0.00952227	0.040613	0.00703446	0.0208765	0.00634743	0.0124185	0.0871851	0.00522792	0.0264917	0.0234
Tex30	0.232059	0.206199	0.175113	0.210877	0.16009	0.15016	0.133961	0.160916	0.145642	0.165763	0.200117	0.153573	0.166792	0.167697	0.144997	0.165795	0.129482	0.142398	0.188127	0.181208	0.189973	0.189918	0.158767	0.204592	0.130512	0.173552	0.206051	0.155789	0.148782	0.133172	0.241954	0.0677733	0.0981815	0.109952	0.170734	0.260008	0.216587	0.164482	0.167635	0.129775	0.201476	0.184159	0.156442	0.156668	0.120368	0.289001	0.223563	0.24268	0.262574
Kdelc1	0.260951	0.16494	0.127523	0.196252	0.238811	0.240006	0.129106	0.105804	0.153779	0.218103	0.247196	0.159442	0.130964	0.255439	0.24734	0.260828	0.127639	0.080397	0.248825	0.283878	0.30734	0.167333	0.14645	0.241358	0.288573	0.301872	0.189832	0.116965	0.236024	0.289951	0.359785	0.153534	0.127018	0.342711	0.282632	0.22865	0.170614	0.157736	0.227645	0.262513	0.196982	0.179839	0.0896568	0.210674	0.14147	0.309927	0.153967	0.0908127	0.139783
Bivm	0.0670553	0.0212975	0.0349472	0.0923328	0.0889851	0.0513077	0.0199805	0.0339316	0.0732943	0.0835745	0.0846928	0.0193334	0.0358522	0.0587524	0.0890688	0.0524048	0.0337764	0.0594477	0.0408561	0.0531731	0.0840805	0.0461605	0.0240346	0.0542752	0.0657663	0.0672803	0.0499845	0.0257115	0.0343864	0.0372352	0.0474988	0.0624702	0.0285112	0.085444	0.0885783	0.0341345	0.0419502	0.0732508	0.0242633	0.039637	0.058845	0.0274328	0.0429847	0.0428656	0.0532332	0.0401177	0.0256759	0.083582	0.0745865
Ercc5	0.246911	0.232778	0.191557	0.28016	0.264134	0.241826	0.200096	0.199611	0.226382	0.265843	0.202804	0.137109	0.184318	0.211785	0.213775	0.197292	0.22608	0.205371	0.304446	0.267424	0.207738	0.168279	0.262241	0.202506	0.294256	0.184584	0.189192	0.261266	0.241013	0.254533	0.231363	0.244625	0.14766	0.297966	0.219282	0.22545	0.190412	0.31334	0.189083	0.179735	0.178305	0.207524	0.196629	0.198312	0.189871	0.233821	0.164095	0.236858	0.266354
Mettl21e	0	0	0	0	0	0	0	0	0	0	0	0	0	0	0	0	0	0	0	0	0	0	0	0	0	0.00221653	0	0	0	0	0	0	0	0	0.00303419	0	0	0	0	0	0	0	0	0	0	0	0	0	0
Gulp1	0.547882	0.34077	0.231341	0.392865	0.275206	0.407801	0.327016	0.254792	0.398691	0.323107	0.275385	0.192886	0.180326	0.269026	0.230246	0.505964	0.261196	0.218064	0.437367	0.253278	0.199721	0.128129	0.197008	0.22706	0.151146	0.598526	0.395486	0.390274	0.407483	0.430684	0.446981	0.430896	0.316846	0.53047	0.36785	0.463277	0.278433	0.289697	0.352114	0.31846	0.363459	0.266706	0.245427	0.333959	0.304786	0.153408	0.0674215	0.0810239	0.172341
4930521E06Rik	0	0	0	0	0	0	0	0	0	0	0	0	0	0	0	0	0	0	0.00368615	0	0	0	0	0	0	0	0	0	0	0	0	0	0	0	0	0	0	0	0	0	0	0	0	0	0	0	0	0	0
Col3a1	11.9789	6.05204	6.77058	5.64817	5.62556	12.7817	6.67317	6.99463	6.3607	6.75038	11.0877	8.58673	13.3354	14.2482	17.8523	18.0228	9.61308	10.139	9.56563	12.242	10.7076	8.75125	11.2503	11.2718	16.1824	22.7593	12.8621	20.1269	17.0953	16.906	17.7418	10.6951	13.3508	12.4253	12.6766	11.3118	6.41739	8.85243	8.93176	10.5018	11.7047	7.06584	7.28709	7.04343	5.78216	10.8179	7.03385	5.6033	2.40849
Col5a2	1.47759	0.900292	0.919989	0.866776	0.696152	1.18029	0.67147	0.933353	0.752965	0.620106	0.854588	0.558264	0.76551	0.967286	0.88645	1.21321	0.793116	0.970054	1.11059	0.932577	0.974603	0.493173	0.746757	0.86387	0.735391	1.66078	1.11681	1.84246	1.57065	1.14639	1.4698	1.2021	1.26501	1.2591	0.975732	1.05092	0.667722	0.775037	0.972912	0.839868	1.61872	1.19092	1.12206	0.680761	0.513614	0.492625	0.138683	0.123182	0.110943
Wdr75	0.254171	0.241262	0.266071	0.206465	0.318219	0.259707	0.24771	0.174669	0.197169	0.304733	0.347638	0.307795	0.313909	0.327933	0.376022	0.289674	0.294006	0.226073	0.161806	0.32048	0.322121	0.312018	0.268278	0.262422	0.32014	0.28863	0.330045	0.208959	0.23461	0.348138	0.295078	0.379412	0.297983	0.1848	0.342889	0.262118	0.218002	0.253379	0.190593	0.242957	0.292496	0.232545	0.168971	0.233839	0.248852	0.389923	0.272463	0.303798	0.317221
Gm5269	0	0	0	0	0	0	0.00365481	0	0	0	0	0	0	0	0	0	0	0	0	0	0	0	0	0	0	0.00144628	0	0	0	0	0.00997861	0	0	0.00826547	0	0	0	0	0	0	0	0	0	0	0	0	0	0	0
Slc40a1	0.570375	0.348222	0.395896	0.599548	0.61255	0.287615	0.212197	0.226512	0.188562	0.278786	0.104228	0.0899973	0.115867	0.105318	0.144636	0.137756	0.208078	0.240176	0.215814	0.302337	0.0254867	0.0205244	0.171384	0.0975781	0.155559	0.415825	0.291575	0.484535	0.365636	0.625844	0.376916	0.364064	0.574414	0.498521	0.562032	0.158555	0.160133	0.235035	0.188362	0.342669	0.206747	0.219445	0.302273	0.244803	0.26931	0.0747842	0.0186759	0.0472709	0.0522748
Dnah7b	0.0562338	0.0448112	0.0604779	0.0541664	0.0360406	0.0447051	0.044308	0.0538138	0.0747471	0.0602235	0.0448958	0.0372863	0.0547899	0.0500106	0.0594047	0.0724831	0.0628818	0.094516	0.075111	0.0848149	0.0626436	0.0294202	0.073098	0.0835361	0.0566194	0.0411751	0.0267327	0.0318294	0.0457635	0.03409	0.0484168	0.0551614	0.104882	0.0547008	0.0792705	0.041459	0.0475699	0.0629989	0.0607712	0.0229997	0.0393878	0.0700703	0.0716675	0.0411473	0.0467089	0.0632134	0.0776768	0.089787	0.0601006
Dnah7c	0	0	0	0	0.00435103	0	0	0.0047972	0	0	0.00234169	0	0.00319147	0.00196032	0.00383128	0	0	0	0	0	0	0.00181064	0.00739118	0	0.00296868	0.00396396	0	0	0	0.00171181	0	0	0	0	0	0	0.00611852	0	0	0	0	0	0	0	0	0.00536596	0	0.0119699	0.000572172
Slc39a10	0.43516	0.381395	0.213408	0.187515	0.24638	0.280793	0.204271	0.202179	0.134278	0.146015	0.36891	0.270988	0.280184	0.233945	0.25908	0.255892	0.23254	0.189003	0.243057	0.164884	0.449374	0.302929	0.345515	0.304799	0.283022	0.287343	0.263943	0.158977	0.224255	0.248121	0.57606	0.528181	0.265459	0.201513	0.252248	0.289486	0.281677	0.246428	0.097078	0.24216	0.244596	0.215302	0.125453	0.136693	0.0987174	0.22483	0.309493	0.248421	0.271144
Gm28151	0.017888	0	0	0	0	0.00530236	0.00496333	0.00461834	0	0.00382758	0.0166907	0	0.00286932	0.0128484	0.00250159	0	0.0163812	0	0.00383165	0	0.0104783	0.00247397	0.00463638	0.012836	0	0.00202423	0.00780986	0	0.00253043	0.00322924	0.00479357	0	0.00854806	0	0.0100499	0.00406348	0	0	0	0	0.00187972	0	0	0.00992567	0	0.00865396	0	0.0105753	0.004846
Gm28826	0	0	0	0	0	0	0	0	0	0	0	0	0	0	0	0	0	0	0	0	0	0.00246475	0.00490453	0	0	0	0	0	0	0	0	0	0	0	0	0	0	0	0	0	0	0	0	0	0	0	0	0	0
C230029F24Rik	0	0	0	0	0	0	0	0	0	0	0	0	0	0	0	0	0	0	0	0	0	0	0	0	0	0	0	0	0	0	0	0	0	0	0	0	0	0	0	0	0	0	0	0	0	0	0	0	0
4933411E06Rik	0.00366952	0.00515157	0.0124296	0	0	0.00163113	0	0	0.00453753	0.000835444	0.0098831	0.0116216	0.00183214	0.00284965	0.00222904	0	0	0	0	0.00181957	0.00444607	0	0.00574112	0.00232973	0.00427019	0.00500236	0	0	0	0	0	0.0152911	0	0	0	0	0.00741948	0	0.00570491	0	0.00283068	0	0	0.00917893	0.00303537	0	0	0	0.000894044
Gm29665	0	0	0	0	0	0	0	0	0	0	0	0	0	0	0	0	0	0	0	0	0	0	0	0	0	0	0	0	0	0	0	0	0	0	0	0	0	0	0	0	0	0	0	0	0	0	0	0	0
Gm28321	0	0	0	0	0	0	0	0	0	0	0	0	0	0	0	0	0	0	0	0	0	0	0	0	0	0	0	0	0	0	0	0	0	0	0	0	0	0	0	0	0	0	0	0	0	0	0	0	0
Tmeff2	0.00536264	0.00773203	0.00617274	0.0254556	0.0216664	0.0701813	0.0696407	0.0929416	0.207097	0.245282	0.0880741	0.0551954	0.085787	0.173374	0.127238	0.312227	0.223787	0.359864	1.07101	1.12518	0.134231	0.0529292	0.144137	0.396734	0.302492	0.115908	0.0548301	0.110816	0.300219	0.216909	0.191229	0.123779	0.211161	0.716023	0.645655	0.10061	0.0949492	0.10312	0.384152	0.301929	0.00699064	0.0460234	0.0171724	0.0237566	0.0500085	0	0.121451	0.118381	0.0138913
Gm28322	0	0	0	0	0	0	0.00251361	0	0.00343597	0	0	0.00195544	0.00136543	0.00244021	0.00158899	0	0.003606	0	0	0	0.000861209	0.00354361	0.00192576	0.00450446	0.0014396	0	0	0	0	0	0	0	0	0	0	0	0	0	0	0	0	0	0	0	0.00375866	0	0	0	0
Gm28319	0	0	0	0	0	0	0	0	0	0	0	0	0	0	0	0	0	0	0	0	0	0	0	0	0	0	0	0	0	0	0	0	0	0	0	0	0	0	0	0	0	0	0	0	0	0	0	0	0
Gm29325	0	0	0	0	0	0.00288152	0	0	0.00734055	0	0.00128182	0	0.00392988	0.0119603	0.00351168	0.00327955	0.0145993	0.0206975	0.0530186	0.0252539	0	0.00773242	0.00167289	0.0191135	0.0095054	0.00133902	0.00364119	0	0.0035298	0.00604257	0	0	0	0.00974761	0.0081299	0.0024801	0	0.0100316	0	0.0152098	0	0	0	0	0	0	0.00956014	0	0
9330175M20Rik	0	0	0	0	0	0	0	0	0.00816124	0.00417812	0	0	0	0.00254194	0	0.00341698	0	0	0.00847669	0.00502261	0.00573555	0	0	0.00162583	0	0	0	0	0	0	0	0	0	0.0151544	0.0030813	0.00224956	0	0	0	0.00626268	0	0	0.00660764	0.00114964	0.00855561	0	0.00754409	0	0
Cavin2	0.163074	0.0705	0.0234594	0.0954785	0.0436113	2.74688	2.39195	2.49726	3.21909	2.99152	1.05524	0.612263	0.901596	0.90357	0.93956	1.69306	1.25179	1.60177	1.7656	1.59565	0.739787	0.650517	0.636652	0.868396	0.895716	0.975464	0.69123	0.697756	1.1761	0.820565	0.888177	0.96993	1.10809	1.41963	1.19262	0.807544	0.423235	0.583698	0.897896	0.844922	2.07469	2.25434	2.39065	2.74497	2.89348	0.0382089	0.528639	0.293276	0.0370124
1700072G22Rik	0.00453121	0.014741	0	0	0.00149379	0.00335231	0	0	0	0	0.00159041	0.00601925	0.00488052	0	0.00343068	0.00539966	0	0	0	0	0.00334689	0	0	0	0	0.00174486	0	0	0.0107447	0	0	0	0	0	0	0.00263336	0.00679517	0	0	0	0.00334874	0	0	0	0	0	0	0	0.000302304
Nabp1	0.131822	0.142315	0.150874	0.344455	0.12618	0.105821	0.128295	0.108209	0.242796	0.15235	0.145743	0.0885301	0.107231	0.156028	0.101151	0.207563	0.165263	0.138939	0.412011	0.182895	0.158977	0.102738	0.150056	0.333125	0.163653	0.124042	0.111039	0.0711593	0.209888	0.14247	0.072526	0.0930809	0.0435574	0.186365	0.0814843	0.100995	0.114885	0.111845	0.236235	0.126276	0.118944	0.0957098	0.040477	0.109538	0.0683048	0.0731489	0.0883198	0.151744	0.149058
Gm17767	0	0	0	0	0	0	0	0	0	0	0	0	0	0	0	0	0	0	0	0	0	0	0	0	0	0	0	0	0	0	0	0	0	0	0	0	0	0	0	0	0	0	0	0.00646492	0	0	0	0	0
Gm28055	0.00153052	0	0	0	0	0	0	0	0	0	0.0012522	0	0	0.00186706	0	0.00255504	0	0.00251192	0.00486708	0	0	0	0.00333107	0.00615195	0.00142633	0	0	0	0	0	0	0	0	0	0	0	0	0.0076376	0	0	0	0	0	0	0	0	0	0	0
Myo1b	0.593299	0.379394	0.417452	0.401038	0.260578	0.451183	0.369627	0.291006	0.312016	0.229766	0.576767	0.496904	0.523149	0.578652	0.444637	0.660408	0.533307	0.764955	0.477301	0.46131	0.54918	0.616354	0.922704	0.879348	0.66601	0.634971	0.400217	0.565566	0.464455	0.371105	0.608131	0.698858	0.630917	0.470185	0.452116	0.729567	0.544568	0.650459	0.54071	0.367293	0.214952	0.136344	0.213219	0.166656	0.195426	0.428664	0.142204	0.0953136	0.143463
Stat4	0	0.00458353	0	0	0	0	0.00470821	0.00468244	0.00274128	0.00122941	0.00130996	0.00282982	0.00321916	0.00251813	0	0	0.00846531	0	0.00260258	0.00197802	0.00404123	0	0.0165483	0.00467	0.0046256	0	0	0	0	0.00451642	0	0	0	0	0	0.00216103	0.00640294	0	0	0	0.00357063	0	0.0021416	0.0031964	0	0	0	0	0
Gm31812	0.00389091	0	0.00828236	0	0.00350027	0	0	0.00632097	0	0.000928572	0.00536908	0.00239331	0	0.00548655	0.00125689	0.00988312	0.00329981	0	0	0.00485707	0	0.00186807	0.002893	0.00229623	0.0078187	0.00603117	0	0	0.00646371	0.00328164	0.0286845	0.00437307	0	0.00765333	0	0.00282142	0	0	0.00778774	0.00558298	0.00294241	0	0	0	0	0	0.0044427	0.0120155	0.000581025
Stat1	0.205491	0.28723	0.614275	0.85013	0.462628	0.265518	0.372695	0.633657	0.822612	0.778726	0.170269	0.222626	0.498852	0.718126	0.500254	0.238798	0.331429	1.00849	1.03125	0.790728	0.221161	0.261181	0.93531	1.22187	1.01953	0.209786	0.287242	0.691962	0.776202	0.74786	0.0837044	0.201815	0.527179	0.675722	0.550515	0.211657	0.314077	0.556692	0.822452	0.745583	0.247034	0.306893	0.566905	0.817865	0.805396	0.172177	0.357869	0.673488	1.27978
Gls	2.66813	3.06283	3.26498	4.8329	2.98321	2.97072	3.69446	3.39055	4.04032	2.99643	1.80195	1.7542	1.71464	2.85926	1.77461	2.59358	2.58546	2.36216	3.76787	2.37751	1.65711	1.68617	1.68082	2.51411	1.31823	2.7164	3.44833	2.98246	5.45895	3.7717	2.29713	2.86202	2.4045	3.67098	3.06527	2.93473	3.34569	2.71418	4.7511	3.58139	2.03679	3.08235	2.77	3.49241	2.70758	1.49127	1.37309	1.45334	1.73312
Nab1	0.412879	0.461812	0.468786	0.413331	0.439091	0.690323	0.693669	0.796238	0.70427	0.874847	0.457707	0.484115	0.492785	0.429663	0.503558	0.437495	0.652846	0.628898	0.529111	0.62587	0.446127	0.608075	0.596887	0.567236	0.576332	0.479235	0.65914	0.68629	0.575785	0.657063	0.491735	0.486057	0.447793	0.454506	0.644411	0.462421	0.584573	0.593632	0.514202	0.554789	0.851268	0.838804	0.909036	0.700985	0.94574	0.452859	0.60546	0.776494	0.597663
Gm553	0	0	0	0	0	0	0	0	0	0	0.00212641	0	0	0	0	0	0	0	0	0	0.00188791	0.00209531	0	0	0	0	0	0	0	0	0	0	0	0	0	0.00168043	0	0	0.00456591	0	0.0035916	0	0	0.00307638	0	0	0	0	0
Gm28178	0	0	0	0	0	0	0	0	0	0	0	0	0	0	0	0	0	0	0	0	0	0	0	0	0	0.00188255	0	0	0.00379945	0	0	0	0	0	0	0	0	0	0	0	0	0	0	0	0	0	0	0	0
Nemp2	0.0329416	0.0131848	0.0140441	0.0820983	0.0584932	0.043844	0.0176428	0.0469889	0.0393978	0.0331876	0.0253833	0.0214218	0.013213	0.0262767	0.0582673	0.0634141	0.0359991	0.0315368	0.0130809	0.0308237	0.00876182	0.0202608	0.050529	0.051785	0.0344413	0.0306227	0.0137494	0.0303735	0.0210801	0.02252	0.0219948	0.0487354	0.00745752	0.0386627	0.0639397	0.0257248	0.0106266	0.0427725	0.0580647	0.0607942	0.0690381	0.0219568	0.0392598	0.0558586	0.0478665	0.022124	0.0437739	0.028698	0.0100646
Mfsd6	0.0248621	0.0463046	0.0100749	0.0579986	0.0440303	0.0133172	0.00675793	0.0323652	0.00778958	0.0315875	0.00920826	0.00503216	0.0119547	0	0.0176056	0.00411408	0.0154793	0.0411241	0.0373595	0.0209674	0.00783466	0.0143505	0.0127852	0.0131385	0.00526657	0.0137867	0.00925903	0.0646137	0	0.0215003	0.00771776	0.0470515	0.0203564	0.00861676	0.0174943	0.0167757	0.0041732	0.032185	0.0208666	0.0145083	0.0328337	0.0667582	0.0363811	0.0160627	0.0280559	0	0.0203561	0.00985509	0.0141777
Inpp1	0.149422	0.139636	0.168217	0.134128	0.249814	0.110944	0.122034	0.0839842	0.133533	0.117996	0.131146	0.0942506	0.0699757	0.0825959	0.100151	0.0889923	0.111841	0.114914	0.0715582	0.183927	0.100965	0.0829596	0.0868012	0.0801247	0.122752	0.13214	0.179022	0.166152	0.176213	0.198964	0.127295	0.190059	0.0966575	0.165572	0.164771	0.144197	0.109526	0.0972076	0.10733	0.197524	0.09869	0.145817	0.105209	0.127119	0.11918	0.105722	0.107114	0.0558788	0.0698904
Hibch	0.222112	0.196719	0.164737	0.291325	0.262171	0.220245	0.155741	0.138612	0.220257	0.245869	0.228314	0.191974	0.149013	0.196807	0.267414	0.199084	0.109497	0.13648	0.13146	0.231354	0.199746	0.192799	0.145581	0.238678	0.259584	0.187437	0.136209	0.15424	0.232855	0.254817	0.198067	0.108919	0.0933763	0.231499	0.277443	0.19416	0.191186	0.163654	0.20154	0.197302	0.197051	0.126422	0.136296	0.261268	0.271853	0.339835	0.177211	0.160613	0.331509
1700019D03Rik	0.00789117	0	0.00519162	0.00580298	0.017244	0.0214331	0.00839321	0.0130754	0.0125059	0.0130065	0.00627227	0.00233199	0.00856867	0.00788287	0.00316947	0.0114011	0.00516458	0.00764859	0.0100063	0	0.0103159	0.0108194	0.00398425	0.00237866	0.010011	0.0134973	0.00235231	0	0.0101708	0.0301547	0.00553137	0.0229494	0	0.0103932	0	0.00967566	0.00405699	0.00581129	0	0	0.0179863	0.0126927	0.0170496	0.018071	0.0115569	0	0	0	0.00143869
Mstn	0	0	0	0	0	0	0	0	0	0	0	0	0	0	0	0	0	0	0	0	0	0	0	0	0	0	0	0	0	0	0	0	0	0	0	0	0	0	0	0	0	0	0	0	0	0	0	0	0
1700019A02Rik	0	0	0	0	0	0	0	0	0	0	0	0	0	0	0	0	0	0	0	0	0	0	0	0	0	0.00223097	0	0	0	0	0	0	0	0	0	0	0	0	0	0	0	0	0	0	0	0	0	0	0
Pms1	0.022851	0.025249	0.0135204	0.0341606	0.0825547	0.014443	0.00142835	0.0276881	0.018238	0.0332451	0.0333476	0.0178403	0.00911474	0.0251496	0.0232032	0.0206733	0.0316171	0.0205204	0.00858666	0.0470679	0.0315126	0.00591772	0.0065647	0.0262874	0.0313887	0.0282252	0.00851737	0.0123342	0.0269155	0.0179624	0.0759568	0.0409646	0.0550895	0.0145693	0.0424919	0.0372296	0.0218863	0	0.0287861	0.0323658	0.0126115	0.0205135	0.020937	0.00462002	0.0042474	0.0105131	0.00637294	0.0202402	0.00812705
Gm28777	0	0	0	0	0	0	0	0	0	0	0.00121559	0	0	0	0	0	0	0	0	0	0	0	0	0.00282746	0.00125344	0	0	0	0	0.0031433	0	0	0	0	0	0	0	0.00306716	0	0	0	0	0	0	0	0	0	0	0
Ormdl1	0.0519631	0.0458111	0.0577164	0.0113404	0.105541	0.0464635	0.0256052	0.034111	0.0489642	0.059831	0.063967	0.0297219	0.0637424	0.0234774	0.0396352	0.0462601	0.00882095	0.0581982	0.0381363	0.042134	0.0352195	0.0284615	0.0272072	0.0456221	0.0437535	0.0387278	0.0274628	0.0220124	0.0231052	0.027169	0.0691333	0.0664815	0.00979853	0.0723528	0.0818709	0.0213502	0.0354702	0.0231772	0.0263922	0.0433961	0.0425599	0.0329028	0.0165793	0.0365693	0.0188671	0.108432	0.0825489	0.0742333	0.127089
Gm28778	0	0	0	0	0	0	0	0	0	0	0	0	0	0	0	0	0	0	0	0	0	0	0	0	0	0	0	0	0	0	0	0	0	0	0	0	0	0	0	0	0	0	0	0	0	0	0	0	0
Osgepl1	0.102024	0.0619594	0.0681701	0.150384	0.0857924	0.0964618	0.0599319	0.0215913	0.0494068	0.0838635	0.0871064	0.0617064	0.0346018	0.0751774	0.0952795	0.0575123	0.0442307	0.0568425	0.0406375	0.0863027	0.075181	0.0494508	0.0739632	0.0875582	0.068777	0.0722952	0.0617836	0.0242735	0.0664295	0.0971787	0.106962	0.106997	0.134036	0.0982852	0.092045	0.0737118	0.0160637	0.056625	0.0394055	0.0631674	0.0731975	0.0687868	0.048411	0.0971858	0.0939717	0.118502	0.133483	0.102778	0.159434
Gm28551	0.00205559	0.00302072	0	0.0074441	0.00497919	0.0135823	0	0	0	0.00587431	0.00147906	0.00458384	0	0	0.00125959	0	0	0.0075926	0.00403343	0	0	0.00192435	0	0	0.00185835	0.00197294	0.00480126	0.00462409	0	0.0011977	0.0140376	0	0.0119375	0	0.00773577	0	0	0.00553918	0	0.00917272	0.00286275	0	0.00405515	0.00257504	0.00230827	0.00525315	0	0	0
Asnsd1	0.194388	0.154634	0.137714	0.155726	0.220272	0.146666	0.119714	0.128262	0.101724	0.112743	0.244896	0.169021	0.176774	0.171774	0.20346	0.18811	0.113566	0.0898311	0.107634	0.157004	0.197156	0.137248	0.151724	0.151652	0.204885	0.194939	0.13587	0.140003	0.199654	0.198879	0.30569	0.208907	0.271447	0.147406	0.179084	0.167393	0.152225	0.157523	0.0975011	0.0890754	0.102917	0.0900335	0.135505	0.0774692	0.147039	0.248455	0.0581234	0.157035	0.0886202
Dnah7a	0.00191177	0.00196684	0	0	0	0	0.0135847	0.00870078	0.00976018	0.00188158	0.00657542	0.00656812	0	0.00434745	0.00659221	0.0276279	0.0146911	0.00475734	0.00240331	0.0112792	0.005434	0.00625045	0.00281572	0	0.00576068	0.00782897	0.00294679	0	0	0	0	0	0.0278447	0.00862851	0.00548307	0.00621208	0	0.0103489	0.0186752	0	0.00815929	0	0.00257056	0.0108123	0.00761949	0	0	0	0.00113724
Stk17b	0.206597	0.173523	0.224978	0.26646	0.192166	0.604452	0.337781	0.265643	0.52981	0.465977	0.263651	0.130173	0.0924163	0.160127	0.130347	0.436216	0.232254	0.239152	0.40445	0.363349	0.210228	0.120651	0.195338	0.262029	0.166579	0.398277	0.275062	0.18251	0.231392	0.198021	0.345524	0.129412	0.129623	0.176155	0.207666	0.297645	0.289779	0.160759	0.305747	0.225525	0.545911	0.487474	0.43907	0.461904	0.42875	0.118031	0.154949	0.077274	0.11096
Hecw2	0.104758	0.0795957	0.0537367	0.11104	0.0840719	0.0872534	0.0596473	0.0487729	0.0513984	0.0445118	0.0331518	0.0110258	0.00969773	0.0236536	0.0321441	0.0395588	0.0851424	0.0424488	0.0811844	0.0894803	0.01945	0.0129238	0.0146414	0.0477592	0.0431688	0.0535064	0.0401755	0.0345674	0.0517182	0.0570687	0.11699	0.0417446	0.141225	0.166598	0.0572171	0.0801636	0.0298333	0.0534492	0.058718	0.0646208	0.0956526	0.0735507	0.0205618	0.0461018	0.0364629	0	0.0055238	0.00425949	0.0041937
Ccdc150	0.00233761	0	0	0	0	0	0	0	0.00302331	0	0	0	0.00261763	0	0	0	0	0	0	0	0	0	0	0	0	0	0	0	0	0	0	0.00581666	0	0	0	0	0	0	0	0	0	0	0	0.00114964	0	0	0	0.00511287	0
Gtf3c3	0.172061	0.116856	0.0969162	0.0909289	0.182231	0.132542	0.124358	0.0908997	0.137505	0.122318	0.103943	0.135112	0.128497	0.1141	0.194784	0.125219	0.132826	0.136884	0.138154	0.167578	0.163905	0.0786498	0.0954679	0.152783	0.143456	0.105181	0.140052	0.125838	0.0958002	0.180915	0.207981	0.172943	0.112179	0.148929	0.171398	0.143533	0.107357	0.0761806	0.0775832	0.173365	0.158888	0.0698795	0.13709	0.126465	0.13789	0.214585	0.188386	0.144019	0.127139
Gm34066	0	0	0	0	0	0	0	0	0	0	0	0	0	0	0	0	0	0	0	0	0	0	0	0	0	0	0	0	0	0	0	0	0	0	0	0	0	0	0	0	0	0	0	0	0	0	0	0	0
Pgap1	0.0755304	0.0477955	0.0305159	0.064659	0.0724781	0.0537994	0.054285	0.0482113	0.0268714	0.0365645	0.0510132	0.0248184	0.0318117	0.0343692	0.0464878	0.0546201	0.0730525	0.0305432	0.0705867	0.037095	0.0489062	0.0405017	0.0345556	0.043421	0.0411519	0.0286051	0.0212448	0.0385251	0.0407904	0.0508644	0.0519905	0.0351344	0.0745257	0.0432978	0.0784466	0.0448529	0.040811	0.0416853	0.0608662	0.0308399	0.0592109	0.119959	0.062332	0.114467	0.0332082	0.0264612	0.0451423	0.0512717	0.0205613
Ankrd44	0.0653043	0.103333	0.0591793	0.050432	0.0610266	0.0258818	0.0250706	0.00589459	0.0112263	0.0194413	0.0206034	0.00832611	0.0124266	0.00670617	0.0121349	0.0334533	0.0290812	0.0207221	0.0326416	0.0453685	0.0439821	0.0281929	0.0374918	0.0383226	0.0234149	0.0572615	0.0578431	0.0608558	0.0470355	0.0219787	0.156928	0.035651	0.0885978	0.0555959	0.0190143	0.0603086	0.00539712	0.0250665	0.0375727	0.0277887	0.0496183	0.0404451	0.0211673	0.0128334	0.002991	0.14333	0.0297464	0.0391157	0.0593581
4930444A19Rik	0	0	0	0	0	0	0	0	0	0	0	0	0	0	0	0	0	0	0	0	0	0	0	0	0	0	0	0	0	0	0	0	0	0	0	0	0	0	0	0	0	0	0	0	0	0	0	0	0
Sf3b1	3.89345	5.39729	4.9434	4.67943	2.64288	3.45057	4.30066	4.31219	4.09817	2.66112	3.57852	3.91379	3.88547	3.4737	2.55498	3.76749	3.81637	4.49584	5.12422	2.98361	3.69567	4.33304	4.2928	4.22601	2.85874	3.38142	3.94347	3.66828	3.56262	2.4124	2.93698	3.39518	3.2668	2.89374	2.4293	3.65011	5.13381	4.73071	5.25346	2.74005	2.95629	3.76169	3.04611	3.27832	2.29301	3.30306	3.87804	4.22142	3.02225
Coq10b	2.66741	2.82179	2.59363	3.63876	3.18291	1.66115	2.42301	2.23225	2.42216	3.24458	1.94684	1.76865	1.64747	2.1334	1.83188	2.05548	2.1951	2.72528	3.92354	3.45201	1.929	1.95491	2.82531	3.0652	2.70993	1.77014	1.83874	1.97359	2.3899	2.1657	0.537431	0.63779	0.898972	1.2532	1.13087	2.89072	2.72255	2.43356	4.05002	3.62105	1.0258	1.45284	1.41344	1.39702	2.16429	0.70604	0.893127	1.5079	1.03306
Hspd1	2.57541	3.01236	2.42639	1.59875	2.23625	2.61826	2.93956	1.999	1.85811	2.37306	4.00957	4.82135	4.05013	3.59321	3.42545	2.44899	2.67696	1.87047	1.83971	2.85589	3.97119	4.84648	3.34052	2.77499	3.1786	3.00222	3.28604	1.99529	1.85122	2.76477	2.08505	2.33297	2.19849	1.67416	2.17822	3.18154	3.78168	2.51109	2.52546	2.94286	2.55917	2.82664	2.02658	1.9636	2.56162	15.4236	9.17745	8.23673	10.1854
Hspe1	3.91738	4.52466	3.83646	3.34231	4.12088	4.24537	4.27583	3.67176	4.04609	5.14008	5.14556	6.04477	5.25442	5.78072	5.52652	4.08462	3.97396	3.50211	4.03364	6.05978	5.1623	5.96474	4.5388	4.30023	5.9262	4.67904	4.9522	3.80442	3.70051	5.25801	3.6849	4.4209	3.97002	4.15002	4.80419	4.12065	5.11312	3.99379	3.70371	4.56128	3.83909	4.08381	3.35352	3.58087	4.95098	16.876	12.5252	11.0264	13.8785
Mob4	0.731284	0.594905	0.705218	0.639093	0.790455	0.572558	0.574279	0.625976	0.649813	0.916363	0.625031	0.585613	0.653738	0.626926	0.729194	0.524372	0.543938	0.592058	0.597587	0.864732	0.712748	0.722637	0.740171	0.830975	0.894473	0.698489	0.580235	0.563331	0.657764	0.650185	0.781276	0.576436	0.550892	0.61838	0.793868	0.632876	0.636195	0.682252	0.621819	0.897912	0.869934	0.804768	0.785863	0.816921	0.83211	2.78689	1.34149	1.41075	1.45634
Rftn2	0.204557	0.26055	0.33433	0.289864	0.302617	0.142476	0.173498	0.193141	0.18388	0.232163	0.10756	0.132138	0.182993	0.135963	0.170436	0.0971763	0.12376	0.211938	0.159709	0.180319	0.099107	0.173567	0.221178	0.16741	0.199469	0.0983692	0.120571	0.182567	0.16744	0.223614	0.166894	0.208425	0.330423	0.32089	0.250002	0.116134	0.128105	0.202741	0.189653	0.190057	0.0752698	0.135544	0.172024	0.183776	0.143121	0.0493239	0.149696	0.217024	0.195871
Gm10561	0.0535056	0.0556182	0.0674532	0.0330625	0.0874735	0.0232003	0.0450539	0.026639	0.0322127	0.0349207	0.0173055	0.0342768	0.0330289	0.0215107	0.0286786	0.00800545	0.0556348	0.027455	0.0326946	0.0450022	0.0144	0.0252227	0.0338159	0.0626945	0.0228473	0.018613	0.00571281	0.0215183	0.0293634	0.0529282	0.019485	0.0491591	0.053587	0.0868231	0.0605683	0.0342097	0.00547893	0.0368464	0.00840304	0.041403	0.0120127	0.0441595	0.0538876	0.0446447	0.021173	0.108525	0.034976	0.0408882	0.016211
Mars2	0.0372681	0.0391303	0.0250707	0.062052	0.031038	0.0456291	0.0288418	0.0118023	0.0306616	0.0268898	0.01725	0.0207391	0.0174195	0.0220855	0.0100191	0.0274656	0.0187171	0.0152685	0.0520788	0.0306036	0.0203129	0.014834	0.0122699	0.0384511	0.0421391	0.030252	0.0194547	0.0105323	0.0119798	0.0267417	0.00811688	0.0354436	0.0420744	0.0373587	0.0243143	0.0451817	0.0154358	0.0694972	0.0514077	0.0628196	0.0527874	0.0112924	0.00765111	0.0441611	0.0525617	0.0221386	0.0440763	0.0222103	0.0567631
Boll	0	0	0	0	0	0	0.00380267	0	0	0	0	0	0	0	0.00336267	0	0	0	0	0	0	0	0	0	0	0	0	0	0	0	0	0	0	0	0	0	0	0	0	0	0	0	0	0	0	0	0	0	0
Plcl1	0.130733	0.115127	0.109626	0.190004	0.0844151	0.0826078	0.0835598	0.131353	0.145281	0.0701397	0.0362302	0.0343115	0.0415949	0.0876197	0.049368	0.0583208	0.0649884	0.0686828	0.103543	0.0998888	0.0577737	0.134558	0.193286	0.211359	0.164916	0.102275	0.141759	0.181182	0.182161	0.156975	0.0904535	0.0996763	0.0891595	0.221678	0.0928191	0.0774116	0.0673515	0.0421429	0.0966765	0.0866026	0.125017	0.154273	0.102085	0.235955	0.125325	0.021776	0.0853432	0.0746744	0.152147
9130227L01Rik	0	0	0	0	0	0	0	0	0	0	0	0	0	0	0	0	0	0	0	0	0	0	0	0	0	0	0	0	0	0	0	0	0	0	0	0	0	0	0	0	0	0	0	0	0	0	0	0	0
1700003I22Rik	0	0	0	0	0	0	0	0	0	0	0	0	0	0	0	0	0	0	0	0	0	0	0	0	0	0	0	0	0	0	0	0	0	0	0	0	0	0	0	0	0	0	0	0	0	0	0	0	0
Gm28240	0	0	0	0	0	0	0	0	0	0	0	0	0	0	0	0	0	0	0	0	0	0	0	0	0	0	0	0	0	0	0	0	0	0	0	0	0	0	0	0	0	0	0	0	0	0	0	0	0
Hsfy2	0	0	0	0	0	0	0	0	0	0	0	0	0	0	0	0	0	0	0	0	0	0	0	0	0	0	0	0	0	0	0	0	0	0	0	0	0	0	0	0	0	0	0	0	0	0	0	0	0
Satb2	0.00996838	0	0	0	0.00358151	0	0	0	0.00166365	0.00253204	0.00460394	0.00560536	0	0.00513558	0	0.0022929	0	0.0163124	0.0014883	0	0.00466272	0	0.00239374	0.00642307	0.00523654	0	0	0.00788943	0	0.00367998	0	0	0	0	0.00572947	0.00382039	0	0.00379391	0	0	0	0	0	0	0	0	0	0	0
1700126A01Rik	0	0	0	0	0	0	0	0	0	0	0	0	0	0	0	0	0	0	0	0	0	0	0	0	0	0	0	0	0	0	0	0	0	0	0	0	0	0	0	0	0	0	0	0	0	0	0	0	0
BC055402	0	0	0	0	0	0	0	0	0	0	0	0	0	0	0	0	0	0	0	0	0	0	0	0	0	0	0	0	0	0	0	0	0	0	0	0	0	0	0	0	0	0	0	0	0	0	0	0	0
4930558J18Rik	0	0	0	0	0	0	0	0	0	0	0	0	0.00193998	0	0	0	0	0	0	0	0	0	0	0	0.00131201	0	0	0	0	0	0	0	0	0	0	0	0.00534368	0	0	0	0	0	0	0	0.00373223	0	0	0.00557992	0
1700066M21Rik	0.0202373	0.00261221	0	0.0174143	0.0530284	0.0455638	0.0134044	0.00685273	0.0245859	0.0278171	0.021262	0.00899267	0.0150823	0.0264053	0.0475011	0.0399787	0.0403853	0.00438784	0.0480721	0.0189291	0.0401731	0.00579006	0.0144558	0.019874	0.0451549	0.0108252	0.0237665	0	0.0148552	0.0361116	0.0304243	0.0230861	0.0202845	0.0260733	0.0468037	0.0156877	0.00979963	0.00355544	0.0346286	0.0258908	0.0312144	0.0211968	0.0204753	0.0153657	0.0304384	0.0334891	0.00793403	0.0228971	0.0248073
Tyw5	0.0889131	0.0450474	0.0574214	0.0372103	0.138231	0.0918651	0.0640693	0.0559921	0.0703117	0.114728	0.0745677	0.0426724	0.0676857	0.0508969	0.119238	0.0493232	0.014278	0.0541799	0.100254	0.117056	0.0613107	0.0291171	0.0398634	0.061519	0.112145	0.0739909	0.0509708	0.0402039	0.0883792	0.124324	0.0647349	0.0638568	0.0273344	0.115627	0.130825	0.0659521	0.0253274	0.0543503	0.0624633	0.0944229	0.109204	0.0331446	0.0544895	0.120028	0.122677	0.0733299	0.0241936	0.0652505	0.0821622
Maip1	0.256808	0.163613	0.176419	0.262338	0.279408	0.273131	0.143838	0.210947	0.237277	0.374334	0.321604	0.186217	0.229019	0.196053	0.373087	0.257316	0.203115	0.206116	0.204084	0.398049	0.284704	0.201465	0.252493	0.24482	0.393358	0.260111	0.177737	0.155725	0.257441	0.34432	0.343039	0.405053	0.168034	0.251787	0.323114	0.241325	0.170639	0.231513	0.15027	0.339541	0.366696	0.194738	0.207535	0.345975	0.526127	0.240626	0.28391	0.366338	0.299096
Spats2l	1.00165	1.00566	0.776771	0.607405	0.785525	0.571687	0.517742	0.513548	0.397502	0.487114	0.680128	0.985854	1.45668	1.63062	1.42729	0.730363	0.609487	1.00831	0.5756	0.944357	1.01557	1.70983	2.50347	1.85763	2.6096	0.798203	0.57236	0.471652	0.364037	0.484515	0.750335	0.81843	0.986944	0.674523	0.70784	0.730224	0.578537	0.785757	0.505959	0.619847	0.643789	0.654138	0.49576	0.479638	0.660398	0.19351	0.301396	0.472205	0.104023
Gm17234	0	0	0	0	0	0	0	0	0	0	0	0	0	0	0	0	0	0	0	0	0	0	0	0	0	0	0	0	0	0	0	0	0	0	0	0	0	0	0	0	0	0	0	0.00224244	0	0	0	0	0
Kctd18	0.0684135	0.0606214	0.0600226	0.114877	0.114296	0.05008	0.0887133	0.0601025	0.0600462	0.0982416	0.0626867	0.0626547	0.110398	0.0731007	0.0924063	0.0782632	0.0433472	0.0527193	0.122784	0.118769	0.0765953	0.141794	0.131204	0.108703	0.134895	0.0689991	0.0426598	0.0467384	0.0537453	0.0911288	0.145794	0.0693351	0.118503	0.0743142	0.164383	0.0470142	0.07764	0.0512592	0.036301	0.085106	0.0683294	0.0462456	0.0490197	0.0465949	0.050935	0.0437632	0.0363205	0.0627991	0.0676195
Sgo2a	0.0240361	0.019255	0.0227745	0.0129054	0.0328446	0.0177758	0.0187967	0.0119296	0.0194192	0.0301337	0.012233	0.0246125	0.017608	0.00351148	0.00474683	0.00269075	0.0169649	0.054825	0.00610542	0.040358	0.00473039	0.0165014	0.0119866	0.0287591	0.01226	0.0132508	0.0187401	0	0.022918	0.0166507	0.0259074	0	0.0569919	0.0265346	0.0296345	0.0112349	0.0041664	0.0444592	0.0181897	0.0189525	0.0383423	0.00449212	0.0506789	0.0111462	0.0109158	0	0.0162544	0	0.00893233
Aox1	0.0255095	0.0401951	0.0708475	0.103046	0.093985	0.0357819	0.021723	0.0356126	0.0603626	0.0304215	0.023128	0.01094	0.0252279	0.0422673	0.0459994	0.0102054	0.0359989	0.0925445	0.0847166	0.112709	0.0268156	0.0243853	0.030183	0.0732694	0.0427492	0.0270511	0.0172203	0.051304	0.0442316	0.0829933	0.0420363	0.0453265	0.0685727	0.120503	0.107119	0.0495985	0.00359016	0.0176768	0.0990153	0.146504	0.024786	0.0148096	0.0430267	0.0808401	0.0496834	0.0817585	0.0476893	0.117062	0.13176
Aox3	0.176022	0.490947	0.355682	0.612962	0.737307	0.0359205	0.0731224	0.0675667	0.0957683	0.158917	0.0117645	0.00209161	0	0.00545494	0.0119393	0.0256354	0.0926159	0.101129	0.12857	0.131326	0.00256747	0	0.00341258	0.00689277	0.0011635	0.0398495	0.0722188	0.080015	0.0320713	0.112574	0.0646849	0.14303	0.163127	0.393279	0.199935	0.0905093	0.115157	0.0922348	0.121217	0.0863916	0.105417	0.214213	0.151653	0.103405	0.144348	0.0134211	0.0563606	0.00941176	0.0127132
Aox4	0.00473476	0.00988299	0.00806444	0	0	0	0	0	0.00284033	0	0.00264841	0	0	0.00432291	0	0	0	0	0	0	0.00183606	0.00218682	0	0	0.00497381	0.001153	0.00442843	0	0	0	0.0073532	0.00488651	0	0	0.00353161	0.00194349	0	0	0	0	0	0	0	0.0114542	0.00674243	0	0	0	0
Gm15759	0.00112681	0	0	0	0	0	0	0.00142521	0	0.00172884	0.000854052	0	0	0	0	0	0	0	0	0	0.00219684	0	0	0.00362469	0	0	0	0	0	0	0	0	0	0	0	0	0	0	0	0	0	0	0	0	0	0	0	0	0
Aox2	0.0200175	0.0267015	0	0.0117153	0.0168886	0.0238372	0.0237344	0.0108774	0	0.0102804	0.0396335	0.0288003	0.0354156	0.0622992	0.0415444	0.0294074	0.0399562	0.0247389	0.027309	0.0275807	0.0876537	0.0462056	0.0318058	0.0707473	0.0391058	0.0355018	0.0266942	0.0193487	0.0285504	0.0169192	0.0173212	0.057375	0.0253339	0.0103122	0.0113535	0.0491894	0.0308273	0.0168471	0.0277264	0.0339973	0.0077435	0.00721544	0.0118326	0.00538487	0.00141574	0.0233259	0.0141354	0.0132358	0.0100555
Bzw1	3.87944	4.33485	3.2461	2.96385	2.30507	4.13587	4.30341	3.32055	3.7851	2.91354	4.73587	6.5861	5.05637	5.69952	4.49448	3.75332	3.55603	3.55967	3.68335	3.25673	5.8608	7.79976	5.46871	4.88823	4.47557	4.54002	4.95653	3.23703	4.11103	3.63414	4.16946	3.79532	2.80935	2.68555	2.52851	6.13101	6.14745	4.94482	6.83155	4.13787	3.03865	3.67902	3.15953	3.37794	3.24188	2.87684	3.25922	2.31175	2.11089
Clk1	5.61416	7.89774	7.43705	6.84351	5.10656	5.25913	6.95077	6.85826	5.71792	4.16535	4.67411	4.89411	5.24935	4.26183	3.4368	5.54757	7.14749	7.842	6.93791	5.10263	5.10333	4.87629	5.24341	5.22891	3.98116	4.33739	5.68253	6.27428	4.97942	3.84022	2.6387	4.00071	3.84098	2.9327	2.96961	5.88068	7.05406	8.29042	6.75116	4.65576	4.02883	5.15657	5.17603	3.50962	2.95065	3.19004	4.19491	4.7452	2.8636
Ppil3	0.276444	0.233861	0.216256	0.234464	0.282912	0.31253	0.224737	0.215296	0.261317	0.313094	0.305927	0.257493	0.227478	0.286492	0.269909	0.252434	0.232827	0.239561	0.271014	0.293867	0.27144	0.219202	0.296348	0.213338	0.304169	0.350146	0.251363	0.275231	0.265935	0.327364	0.373328	0.346485	0.286225	0.325684	0.328051	0.261753	0.185843	0.236276	0.156293	0.252577	0.284884	0.274865	0.295629	0.2787	0.333279	0.225686	0.188646	0.231623	0.254732
Nif3l1	0.104118	0.110339	0.104587	0.0702961	0.1671	0.0770136	0.101891	0.102516	0.0620683	0.120973	0.162114	0.161173	0.156566	0.115225	0.207755	0.145505	0.0921611	0.106656	0.0585046	0.113845	0.147563	0.133981	0.131841	0.0781885	0.16346	0.118047	0.101368	0.159068	0.0821444	0.163451	0.12768	0.129663	0.128251	0.0953404	0.156313	0.0805909	0.0857602	0.111209	0.154335	0.124082	0.0934366	0.109485	0.0856092	0.0808838	0.124868	0.27241	0.0928475	0.096854	0.0741341
Orc2	0.210602	0.217033	0.188912	0.228607	0.278373	0.19481	0.204938	0.199089	0.116611	0.231947	0.226196	0.270314	0.287578	0.240101	0.223228	0.194667	0.125134	0.160248	0.169089	0.205403	0.160286	0.207028	0.202129	0.215525	0.24609	0.200635	0.277974	0.180133	0.151289	0.266066	0.1949	0.260293	0.218548	0.160795	0.241816	0.189024	0.243628	0.210528	0.194726	0.272465	0.250094	0.245225	0.21955	0.180639	0.226876	0.282371	0.225859	0.218867	0.216794
Gm15834	0.0114134	0.0142701	0.0394649	0.00897012	0.0138816	0.0104151	0.00441747	0.00319236	0.00344827	0.00854721	0.00365628	0.00169778	0.00451205	0.0139971	0.00975307	0.00562962	0.0043416	0.00416522	0.0174724	0.00868607	0.0159294	0	0.00643699	0.00878375	0.0266268	0.0117329	0.00609272	0	0.00339717	0	0.0223229	0.01188	0.0258959	0.0365263	0.0142619	0.0089857	0	0.0153757	0	0.0221159	0.00221794	0	0	0	0	0.00573132	0	0.00853597	0.00927447
Fam126b	0.400427	0.406918	0.575956	0.462902	0.639519	0.407701	0.51106	0.563566	0.451983	0.512142	0.202089	0.112574	0.199179	0.182528	0.257799	0.324474	0.322316	0.460768	0.411417	0.617613	0.169984	0.129486	0.167702	0.229345	0.288337	0.253869	0.311894	0.369956	0.372467	0.405477	0.569432	0.481905	0.554992	0.467943	0.416308	0.279858	0.333782	0.353755	0.262895	0.441594	0.435431	0.480486	0.561423	0.456915	0.46057	0.292802	0.147112	0.220656	0.190091
Ndufb3	1.05319	0.679117	0.717549	0.996919	1.45881	0.997638	0.608028	0.702233	1.26887	1.43042	0.990301	0.579799	0.577306	1.13436	1.21328	0.886596	0.691569	0.656306	1.02927	1.3807	0.986266	0.640458	0.611469	1.06805	1.04288	1.12267	0.627112	0.7065	1.19212	1.64542	1.32976	1.08455	0.80585	1.23589	1.62067	0.997027	0.523159	0.679864	0.983912	1.56948	1.28264	0.821541	0.815181	1.62203	1.76222	1.1838	0.642313	0.705948	1.66298
Als2cr12	0	0	0	0	0	0	0	0	0	0	0	0	0.00178248	0	0	0	0	0	0.00437675	0	0	0	0.00195717	0	0	0	0	0	0	0	0	0	0	0	0	0	0	0	0	0	0	0	0	0	0	0	0	0	0
Cflar	0.542527	0.595325	0.586561	0.810187	0.90173	0.54519	0.483736	0.485975	0.60544	0.703323	0.330427	0.424941	0.426233	0.480586	0.515366	0.550585	0.568391	0.857607	0.800279	0.800784	0.280348	0.426999	0.639298	0.481621	0.500371	0.574097	0.591605	0.673611	0.727699	0.887324	0.858055	0.615282	0.718725	0.659322	0.861746	0.39842	0.580763	0.529498	0.654886	0.695748	0.448047	0.319351	0.453198	0.571399	0.698054	0.416329	0.670875	0.575296	0.668715
Casp8	0.0715458	0.0544525	0.0509843	0.0388101	0.0568917	0.0957849	0.0473251	0.0387529	0.0514561	0.0635325	0.050726	0.0404419	0.0431922	0.0406879	0.0549216	0.107139	0.0426159	0.0444786	0.047122	0.07423	0.0983282	0.0359775	0.0840926	0.085369	0.0915466	0.127998	0.0577075	0.0484736	0.0841494	0.132286	0.084407	0.0461094	0.0978714	0.0923777	0.0961307	0.0466792	0.0356602	0.0632592	0.105652	0.111517	0.0984427	0.0396769	0.0613213	0.0676044	0.0509111	0.077433	0.0442727	0.0683782	0.0663122
Trak2	0.148899	0.168138	0.218333	0.136648	0.110746	0.155455	0.22999	0.155549	0.171019	0.163233	0.134693	0.172728	0.134161	0.162203	0.123835	0.129328	0.171738	0.174938	0.163742	0.12806	0.109057	0.181965	0.192164	0.158559	0.147308	0.13807	0.228082	0.207094	0.2262	0.201628	0.0718867	0.152756	0.0829598	0.136099	0.135706	0.139117	0.144576	0.14737	0.191912	0.133618	0.231993	0.152808	0.147485	0.162357	0.121773	0.236863	0.156008	0.105263	0.142707
Stradb	0.074915	0.0572584	0.0547757	0.083083	0.0637751	0.0637492	0.0301994	0.0501176	0.0743132	0.0591518	0.0538893	0.0243799	0.0659538	0.0570109	0.0579359	0.0840428	0.0428371	0.0585538	0.0562898	0.0961392	0.0612455	0.0537455	0.0468533	0.062548	0.0743494	0.0658363	0.0422999	0.0581899	0.0480002	0.0798876	0.0657124	0.04781	0.0770321	0.0884928	0.0691007	0.0620017	0.068158	0.0453971	0.0776591	0.0913687	0.0701661	0.086482	0.070378	0.0626582	0.103642	0.0862214	0.102257	0.090409	0.0765605
C2cd6b	0	0	0	0	0	0	0	0	0	0	0	0	0	0	0	0	0	0	0	0	0	0	0	0	0	0	0	0	0	0	0	0.0113491	0	0	0	0	0	0	0	0	0	0	0	0	0	0	0	0	0
Gm29018	0	0	0	0	0	0	0	0	0	0	0	0	0	0	0	0	0	0	0	0	0	0	0	0	0	0	0	0	0	0	0	0	0	0	0	0	0	0	0	0	0	0	0	0	0	0	0	0	0
C2cd6	0	0	0.00718705	0	0	0	0	0	0	0	0.00145026	0	0	0	0	0	0	0	0	0	0	0	0	0	0	0	0	0	0	0	0	0	0	0	0	0	0	0	0	0	0	0	0	0	0	0	0	0.00382741	0
Tmem237	0.266053	0.202636	0.238345	0.143685	0.309438	0.203369	0.186318	0.183246	0.172953	0.303357	0.236804	0.17343	0.165982	0.202116	0.212618	0.15905	0.115102	0.131557	0.179145	0.261151	0.234583	0.179773	0.160545	0.240224	0.311947	0.315119	0.176475	0.226429	0.191726	0.27624	0.260868	0.172895	0.188294	0.186605	0.30507	0.274514	0.188148	0.101961	0.13535	0.245056	0.231194	0.204565	0.144735	0.203563	0.295146	0.194865	0.211705	0.0878338	0.153079
G730003C15Rik	0.00419228	0.0124925	0.00537743	0.0058863	0.013487	0.0138459	0.00493997	0.00738842	0.0128017	0.00964728	0.0159674	0.00141368	0.00331959	0.0133348	0.00714951	0.00280927	0	0	0.0106759	0.00317039	0.00981383	0	0	0.00220892	0.00932577	0.00657403	0.0067868	0.00429895	0.00665821	0.0196657	0.0159341	0.0133748	0	0.00274089	0.0124509	0.00213563	0.00483582	0	0.0095222	0.0134305	0.0101618	0.0031652	0.00876668	0.00172111	0.0182982	0.0222901	0.00993042	0.00511331	0.00908155
Mpp4	0.00564576	0	0	0	0	0.00406594	0	0.00318403	0	0.00171617	0	0.00351065	0.00202618	0.0034174	0	0.00216687	0	0.00479004	0	0.00268275	0.00234504	0.00195444	0.00218782	0.00155142	0	0	0	0	0.00318589	0	0	0	0	0.00518252	0	0.00307993	0	0	0.00840304	0.00312983	0.00687273	0.00674504	0	0	0	0	0	0	0.00103834
Gm29017	0	0	0	0	0	0	0	0	0	0	0	0	0	0	0	0	0	0	0	0	0	0	0.00320517	0	0	0	0	0	0	0	0	0	0	0	0	0	0	0	0	0	0	0	0	0	0	0	0	0	0
Als2	0.0176617	0.0203403	0.00578677	0.0039837	0.0145354	0.0267939	0.00946071	0.0283533	0.0185451	0.0300158	0.0220219	0.009593	0.0130846	0.00354384	0.0151103	0.024054	0.0107604	0.00911314	0.0299328	0.00778862	0.0150918	0.0101947	0.0179756	0.015326	0.0254132	0.00556352	0.0269907	0.0127632	0.0144756	0.0112657	0.0215967	0	0.0254381	0.0237609	0.0255952	0.015119	0.0109549	0.00818797	0.0220648	0.0194269	0.0244523	0.032506	0.0323181	0.0161265	0.00944041	0.0300229	0.0433658	0.0190736	0.0323414
Cdk15	0.00277266	0.00651592	0	0	0	0	0	0	0	0	0.00474498	0	0.00171428	0	0.0012543	0	0	0	0	0.00381236	0.00196833	0	0	0.00164135	0	0.00336864	0	0	0	0	0	0.0048765	0	0	0	0	0	0	0	0	0.00272466	0.0095125	0	0.00556876	0.00141574	0.0114147	0	0	0.00275152
Gm29016	0	0	0	0	0	0	0	0	0	0	0	0	0	0	0	0	0	0	0	0	0	0	0	0	0	0	0	0	0	0	0	0	0	0	0	0	0	0	0	0	0	0	0	0	0	0	0	0	0
Fzd7	0.447509	0.235842	0.15722	0.322688	0.332073	0.187994	0.0977781	0.0531245	0.152274	0.136872	0.115566	0.0679659	0.0522661	0.0894765	0.0986684	0.160877	0.124647	0.0546233	0.128968	0.0954996	0.0774185	0.0288	0.0356326	0.0595513	0.0685482	0.118919	0.0627594	0.0615458	0.0515063	0.0974695	0.308078	0.10862	0.203432	0.121658	0.182987	0.151647	0.110769	0.0453107	0.13067	0.152737	0.257859	0.135727	0.127427	0.222099	0.180216	0.023467	0.0451957	0.0180475	0.135426
Gm26813	0	0	0	0	0	0	0.00232177	0	0	0	0	0.00334324	0	0	0	0.00311534	0.00401129	0.0073762	0	0	0	0	0	0	0	0.00172669	0	0	0	0	0	0	0	0	0	0.00459216	0	0	0	0	0	0	0	0	0	0.00670772	0	0.0062886	0.00124685
Gm973	0	0.00458353	0	0.0179577	0	0.00336328	0	0	0	0	0.00314865	0.00209233	0.0054672	0.00311449	0	0	0	0	0	0	0	0.00960638	0.00351028	0.00999625	0.00185835	0	0	0	0	0	0	0	0	0	0	0	0	0.00581129	0	0	0.00328461	0.00770768	0.00257056	0.00318809	0.00191148	0.0121557	0.00603516	0.0157946	0.0132794
Gm28411	0	0	0	0	0	0	0	0	0	0	0	0	0	0	0	0	0	0	0	0	0	0	0	0	0	0	0	0	0	0	0	0	0	0	0	0	0	0	0	0	0	0	0	0	0	0	0	0	0
1700122D07Rik	0	0	0	0	0	0	0	0	0	0	0	0	0	0	0	0	0	0	0	0	0	0	0	0	0	0	0	0	0	0	0	0	0	0	0	0	0	0	0	0	0	0	0	0	0	0	0	0	0
Sumo1	1.72136	1.5399	1.49244	1.41933	1.54681	1.37482	1.13955	1.11381	0.994066	1.32333	1.47284	1.37619	1.52829	1.30047	1.4082	1.36674	1.08886	1.23207	1.18741	1.53443	1.78979	1.64395	1.77501	1.61146	1.69261	1.46337	1.31145	1.23886	1.32097	1.49125	1.41422	1.56129	1.32206	1.287	1.48964	1.47896	1.15823	1.29863	1.21209	1.50237	1.25188	1.01338	1.05564	1.19207	1.28338	2.28462	1.88837	2.48828	2.65781
Nop58	2.53148	3.80592	3.3813	5.5633	1.66508	1.69286	2.47917	1.885	2.13944	0.894267	3.14625	4.02259	3.07828	3.46858	1.58761	3.553	4.13573	3.88148	5.04596	1.49592	3.80243	5.39154	4.26083	6.03356	1.69451	2.41381	4.01185	2.3039	3.02573	1.29562	1.20967	1.45719	0.898959	0.819034	1.01708	2.03435	3.26892	2.2263	2.39541	1.2969	1.20659	1.88314	0.980258	0.990052	0.82789	2.22675	3.36992	3.02152	2.96323
Bmpr2	1.14402	0.83148	0.974473	1.58029	1.30322	1.17583	1.0546	1.28265	1.25415	1.32551	0.584764	0.476394	0.602616	0.554226	0.752107	0.701071	0.814955	0.813029	0.880693	0.905378	0.470858	0.410131	0.655691	0.830195	0.673251	1.00449	1.0663	0.998633	1.46383	1.41308	1.29569	1.05057	1.21011	1.31532	1.4588	0.991494	0.876699	0.950886	1.15375	1.22515	1.12934	1.01513	1.22325	1.37282	1.20764	0.258403	0.105563	0.263159	0.244153
Fam117b	0.387495	0.352699	0.292243	0.456793	0.35971	0.314134	0.4523	0.396566	0.281057	0.292703	0.212386	0.220214	0.15182	0.178173	0.188948	0.282491	0.307445	0.248107	0.238465	0.278911	0.243189	0.156593	0.192161	0.223451	0.159925	0.238021	0.214057	0.264169	0.219649	0.200069	0.462375	0.285151	0.207148	0.302994	0.290839	0.362037	0.356292	0.249375	0.403667	0.241239	0.391189	0.316806	0.311008	0.22883	0.29958	0.117601	0.19974	0.150915	0.1219
Ica1l	0.00888784	0.0328532	0.0205121	0.0185059	0.022407	0.0326808	0.0548993	0.0630782	0.038986	0.0226241	0.00427814	0.0107233	0.00425421	0.0120799	0.00159654	0.0101254	0.0201432	0.0039071	0.00528323	0	0.0182092	0.0253562	0.022307	0.0203294	0.0324241	0.00504206	0.00947385	0.0126865	0	0.00252263	0.017049	0	0.0117724	0	0.00725984	0.0124756	0.014812	0.0147592	0.0126649	0.00283224	0.0632941	0.0478297	0.0384837	0.0128371	0.0216049	0	0	0	0.000861468
Wdr12	0.359306	0.407834	0.26126	0.237893	0.364362	0.245951	0.265177	0.17742	0.159154	0.255384	0.388743	0.509164	0.502985	0.440602	0.450205	0.223605	0.288468	0.20274	0.146751	0.222584	0.458536	0.489861	0.36091	0.367752	0.411306	0.284736	0.337818	0.260728	0.180175	0.297407	0.383321	0.5598	0.335633	0.247185	0.278491	0.338977	0.427611	0.256614	0.229868	0.250664	0.280529	0.315809	0.233167	0.220224	0.25835	0.289346	0.394321	0.339501	0.24706
Carf	0.073011	0.0519285	0.00861767	0.0789816	0.0717149	0.0786113	0.0457184	0.0421016	0.043918	0.0461818	0.0768384	0.0382887	0.05401	0.101332	0.113542	0.120931	0.0466522	0.0288252	0.0624342	0.0590047	0.0635831	0.0769087	0.0500711	0.0817453	0.0884946	0.0903991	0.0349368	0.00880651	0.058563	0.0486106	0.168328	0.0843312	0.0711192	0.126009	0.0711685	0.0755005	0.0248141	0.0486765	0.0355598	0.0597436	0.0671064	0.0166903	0.0265649	0.0424663	0.0477322	0.108326	0.0751014	0.0508837	0.048381
Nbeal1	0.755142	0.606907	0.616527	0.878072	0.621238	0.568044	0.520279	0.552585	0.676197	0.55934	0.489691	0.391275	0.327206	0.433514	0.462702	0.56173	0.599293	0.609858	0.856189	0.679661	0.456721	0.435456	0.582466	0.754768	0.609613	0.64628	0.636687	0.558713	0.702359	0.687479	0.907226	0.815419	0.754232	0.789258	0.730676	0.568408	0.499753	0.415847	0.697976	0.629821	0.644204	0.621147	0.592762	0.631136	0.628637	0.702191	0.310644	0.491142	0.479049
Cyp20a1	0.350559	0.258863	0.156564	0.269872	0.308513	0.325354	0.228019	0.175829	0.169786	0.183383	0.457631	0.330256	0.273837	0.335644	0.302541	0.370677	0.274669	0.170677	0.267336	0.292013	0.512915	0.394503	0.298896	0.438413	0.353778	0.447247	0.347957	0.282277	0.325772	0.337838	0.37218	0.304937	0.269294	0.295736	0.346041	0.331375	0.299137	0.15325	0.263301	0.282294	0.196611	0.191988	0.122567	0.15735	0.184736	0.35616	0.178979	0.161951	0.227436
Abi2	0.441299	0.484458	0.365708	0.421165	0.392186	0.305057	0.313612	0.325042	0.29154	0.299041	0.337811	0.355453	0.379635	0.33553	0.36984	0.454537	0.458955	0.417103	0.36188	0.45358	0.469114	0.402808	0.50797	0.470821	0.579559	0.406318	0.347595	0.231613	0.395134	0.344509	0.421735	0.422192	0.473771	0.353136	0.422401	0.410745	0.292485	0.293121	0.386024	0.349905	0.338136	0.221081	0.29866	0.262516	0.28465	0.329044	0.285692	0.291982	0.278263
Raph1	0.612949	0.539311	0.340058	0.566937	0.362962	0.358653	0.256926	0.194127	0.205444	0.140731	0.246333	0.176147	0.158262	0.224886	0.195766	0.2394	0.378676	0.27577	0.174661	0.321275	0.362249	0.26261	0.363194	0.474399	0.436134	0.491662	0.453261	0.301391	0.526499	0.309486	0.513692	0.27638	0.371513	0.310539	0.255701	0.48938	0.283852	0.260749	0.281596	0.249102	0.206325	0.220408	0.1554	0.131597	0.113012	0.224761	0.143085	0.0719252	0.0991779
Cd28	0	0	0	0	0	0	0	0	0	0	0	0	0	0	0	0	0	0	0.00671042	0	0	0	0.00160862	0	0	0	0	0	0	0	0	0	0	0	0	0	0	0	0	0	0	0	0	0	0	0	0	0	0
Gm11579	0	0	0	0	0	0	0	0	0	0	0	0	0	0	0	0	0	0	0	0	0	0	0	0	0	0	0	0	0	0	0	0	0	0	0	0	0	0	0	0	0	0	0	0	0	0	0	0	0
2310016D23Rik	0	0	0	0	0	0	0	0	0	0	0	0	0	0	0	0	0	0	0	0	0	0	0	0	0.00153763	0	0	0	0	0	0	0	0	0	0	0	0	0	0	0	0	0	0	0	0	0	0	0	0
Ctla4	0	0	0	0	0	0	0	0	0	0	0	0	0	0	0	0	0	0	0	0	0	0	0	0	0	0	0	0	0	0	0	0	0	0	0	0	0	0	0	0	0	0	0	0	0	0	0	0	0.0251528
Icos	0.00249807	0	0	0.00581758	0	0	0	0	0	0	0.000973524	0	0.00193023	0	0	0	0	0	0	0	0	0	0	0	0	0.00419428	0	0	0	0	0	0	0.0217234	0	0.00412339	0	0.00269856	0	0	0	0	0	0	0	0	0	0	0	0
Gm28083	0	0	0	0	0	0	0	0	0	0	0	0	0	0	0	0	0	0	0	0	0	0	0	0	0	0	0	0	0	0	0	0	0	0	0	0	0	0	0	0	0	0	0	0	0	0	0	0	0
Gm11587	0	0	0	0	0	0	0	0	0	0	0	0	0	0	0	0	0	0	0	0	0	0	0	0	0	0	0	0	0	0	0	0	0	0	0	0	0	0	0	0	0	0	0	0	0	0	0	0	0
9530026F06Rik	0	0	0	0	0	0.00188359	0	0.00858308	0	0.000805707	0.00128182	0.00141221	0.00257305	0.00335143	0.00992564	0	0.00481526	0	0	0.00280656	0	0.00219954	0	0.00224464	0.0138262	0	0	0.00697367	0.00498222	0	0	0	0	0	0.0018949	0.0030137	0	0	0	0	0	0	0	0	0.00152927	0.0051208	0.00643049	0.00961503	0
Gm11588	0	0	0	0	0	0	0	0	0	0	0	0.00100999	0	0	0	0	0	0	0	0	0	0	0	0	0	0	0	0	0	0	0	0	0	0	0	0	0	0	0	0	0	0	0	0	0	0	0	0	0
Gm28449	0	0	0	0	0	0	0	0	0	0	0	0	0	0	0	0	0	0	0	0	0	0	0	0	0	0	0	0	0	0	0	0	0	0	0	0	0	0	0	0	0	0	0	0	0	0	0	0	0
4930587A21Rik	0	0	0	0	0	0	0	0	0	0	0	0	0	0	0	0	0	0	0	0	0	0	0	0	0	0	0	0	0	0	0	0	0	0	0	0	0	0	0	0	0	0	0	0	0	0	0	0	0
Pard3b	0.58213	0.597162	0.373368	0.323353	0.383482	0.458436	0.544235	0.4807	0.43863	0.376719	0.538037	0.42996	0.413839	0.338628	0.31477	0.483318	0.485727	0.62669	0.557576	0.467559	0.4231	0.370038	0.456542	0.532545	0.385794	0.347407	0.360361	0.338338	0.273897	0.246734	0.402925	0.644233	0.493317	0.527753	0.325147	0.611415	0.684164	0.476703	0.486665	0.261266	0.428709	0.610301	0.441534	0.394358	0.33033	0.244299	0.355526	0.369373	0.21215
Pard3bos1	0.022967	0.0240132	0	0.00818514	0.0195664	0.0102641	0.0452686	0.0143566	0.00688393	0.0139717	0.00688299	0.00972945	0.00225219	0.00315916	0.0131477	0.0313661	0.0704367	0.00286071	0.0226363	0.0330011	0.00643745	0.0108933	0.00719732	0.00144144	0.0490911	0.00409182	0.00220881	0.00334093	0.00596026	0.00153845	0.0208456	0.00924941	0	0.014435	0.0614766	0.0171453	0.0334655	0.0182148	0	0.0175176	0.0080889	0.0164513	0	0.00323421	0.00905287	0	0.0273152	0	0.00707613
Pard3bos2	0	0	0	0	0	0	0	0	0	0	0	0	0	0	0	0	0	0	0	0	0	0	0	0	0	0	0	0	0	0	0	0	0	0	0	0	0.00271155	0	0	0	0	0	0	0	0	0	0	0	0
Pard3bos3	0	0.00250205	0	0	0	0	0.00311401	0	0	0	0	0	0	0	0	0	0	0	0	0	0	0	0	0	0	0	0	0	0	0.00160072	0	0	0	0	0.00179797	0	0.0054501	0	0	0	0	0.00452375	0	0	0	0	0	0	0
Gm29084	0	0	0	0	0	0	0	0	0	0	0	0	0	0	0	0	0	0	0	0	0	0	0	0	0	0	0	0	0	0	0	0	0	0	0	0	0	0	0	0	0	0	0	0	0	0	0	0	0
Nrp2	1.64076	1.9644	2.2891	2.30295	2.44529	0.507506	1.16837	1.30654	1.12196	1.24814	1.02321	1.35599	1.49	1.35196	1.56785	0.521385	1.11453	1.64805	1.29765	1.26368	0.977493	1.62332	1.54421	1.61848	1.54728	0.32148	0.591116	0.740281	0.770766	0.743948	0.971972	1.50319	2.10122	1.71113	1.5695	0.912907	1.52769	1.32796	1.19705	1.34402	0.310643	0.554168	0.871024	0.875174	1.00069	0.169373	1.74145	2.17406	0.500872
Gm29083	0	0	0	0	0.00654961	0	0.00250836	0.00212859	0.0041519	0.00641799	0	0.00158667	0	0	0.00238754	0	0.00689224	0.00471115	0	0.00339514	0	0	0.00237681	0	0.0011164	0	0	0	0	0	0	0	0	0	0	0	0	0	0	0	0	0	0.00795186	0.00621662	0.00338361	0	0	0	0.000587997
Gm4208	0	0	0	0	0	0.00281552	0	0	0.00168518	0	0	0	0.00235701	0	0	0	0	0	0	0.00224826	0	0	0	0.0017118	0	0.00228688	0.00348443	0	0	0	0	0	0	0	0	0	0	0	0	0	0.00393271	0	0	0	0	0	0	0	0
Ino80d	0.518763	0.628277	0.528193	0.579442	0.44754	0.556901	0.49328	0.488745	0.556226	0.444445	0.374997	0.34736	0.434218	0.336035	0.364612	0.520539	0.403287	0.424965	0.605201	0.413169	0.399188	0.407547	0.459336	0.424378	0.402826	0.395054	0.46584	0.346005	0.483331	0.39518	0.606356	0.572544	0.578531	0.58116	0.503218	0.487042	0.454443	0.446681	0.543672	0.530358	0.431689	0.551916	0.408696	0.369119	0.295284	0.240543	0.533111	0.416692	0.386734
Ino80dos	0.0712798	0.0490069	0.0425377	0.0835512	0.040187	0.0438223	0.0335934	0.0174595	0.0424291	0.0126165	0.0458197	0.0160549	0.0174931	0.0375502	0.0172639	0.0659092	0.0275497	0.0166125	0.0679609	0.0525613	0.0618696	0.0130691	0.0183869	0.0695469	0.0157288	0.0287603	0.00946082	0.0367578	0.0387114	0.0227379	0.0487491	0.0830444	0	0.0544646	0.0313258	0.0480011	0.018496	0.0454498	0.0339053	0.0218289	0.0544636	0.0192162	0.0322068	0.0248157	0.0305444	0.0208353	0.0262411	0.0122273	0.0301427
Gm20342	0.408033	0.186758	0.195543	0.176982	0.146788	0.253124	0.0905708	0.131363	0.168671	0.0931693	0.214058	0.101345	0.150886	0.154759	0.118601	0.292697	0.0725414	0.159371	0.235726	0.0957439	0.262167	0.142117	0.0942728	0.154452	0.115841	0.189745	0.122668	0.0876978	0.106607	0.11005	0.197575	0.109651	0.112717	0.204565	0.147253	0.202442	0.139543	0.185078	0.179382	0.122758	0.176855	0.119873	0.109696	0.103765	0.0851525	0.741498	0.167533	0.215803	0.131475
Ndufs1	0.312105	0.274985	0.301406	0.298626	0.417146	0.321618	0.283803	0.359882	0.330051	0.399898	0.378688	0.279169	0.363023	0.323639	0.429014	0.381649	0.307227	0.272701	0.300512	0.345444	0.377466	0.239688	0.308272	0.387269	0.379702	0.350429	0.327722	0.280478	0.352089	0.385798	0.370121	0.433528	0.341328	0.345516	0.354936	0.31198	0.207745	0.259151	0.300663	0.359886	0.461322	0.550965	0.382288	0.454493	0.343917	0.695204	0.548572	0.577749	0.793551
Eef1b2	12.9216	11.838	14.079	13.7945	14.5698	13.5199	12.9497	14.1312	14.3076	14.528	18.4586	20.1479	20.0414	22.1921	21.4375	15.1255	14.9027	16.8194	15.0521	14.7978	18.5569	18.7561	16.9787	19.0756	18.8342	13.8428	13.9933	15.1065	15.0776	15.8296	13.9996	14.0053	15.3392	14.6646	16.1353	16.419	15.3693	17.7612	17.0882	17.3606	9.2145	10.2084	11.7474	12.6873	13.8852	13.01	14.6612	12.9509	9.07367
Gpr1	0	0	0	0	0	0	0	0	0	0	0	0	0	0	0	0.00457758	0	0	0.00376013	0	0	0	0	0	0	0	0	0	0	0	0	0	0	0	0	0	0	0	0	0	0	0	0	0	0	0	0	0	0
Gm11608	0	0	0	0	0	0	0	0	0	0	0	0	0	0	0	0	0	0	0	0	0	0	0	0	0	0	0	0	0	0	0	0	0	0	0	0	0	0	0	0	0	0	0	0	0	0	0	0	0
Zdbf2	2.18431	2.81249	2.2028	2.04522	0.630402	1.08667	1.99389	0.921811	0.59692	0.287268	0.991161	0.880764	0.323072	0.102727	0.0738179	0.79695	1.11157	0.482383	0.200401	0.0168823	1.03683	0.7133	0.41655	0.240723	0.0105844	0.810394	0.929062	0.688217	0.388126	0.129695	0.24488	0.151076	0.136189	0.0821645	0.0546139	2.34184	2.69663	0.72923	1.14536	0.389293	0.813546	1.22761	0.635018	0.279201	0.101877	0.333738	0.58454	0.125537	0.0875423
Adam23	0.170591	0.0560165	0.0543021	0.05788	0.0826928	0.0868073	0.0336523	0.0267991	0.0126217	0.0320729	0.185983	0.0706755	0.0855107	0.234326	0.137913	0.200122	0.0271977	0.229141	0.338626	0.160626	0.184278	0.0637575	0.197681	0.564068	0.373234	0.0924605	0.0192132	0.0254771	0.0243302	0.0246237	0.15129	0.0799066	0.116379	0.23816	0.12205	0.0958979	0.0379794	0.066741	0.154273	0.0682752	0.119745	0	0.0108969	0.00255879	0.00536243	0.172389	0.0810346	0.0560335	0.06656
Gm39653	0	0	0	0	0	0	0	0	0	0	0.00106071	0	0	0	0	0	0	0	0	0	0	0	0	0	0	0	0	0	0	0	0	0	0	0	0	0	0	0	0	0	0	0	0	0	0	0	0	0	0
Dytn	0	0	0	0	0	0	0	0	0	0	0	0	0	0	0	0	0	0	0	0	0	0	0	0	0	0	0	0	0	0	0	0	0	0	0	0	0	0	0	0	0	0	0	0	0	0	0	0	0
Mdh1b	0	0	0	0	0	0	0	0	0	0	0	0	0	0	0	0	0	0	0	0	0	0	0	0	0	0	0	0	0	0	0	0	0	0	0	0	0	0	0	0	0	0	0	0	0	0	0	0	0
Fastkd2	0.105281	0.102304	0.0944866	0.115492	0.102447	0.0838353	0.0879922	0.0854714	0.0762819	0.0907925	0.115655	0.106521	0.112602	0.098748	0.136227	0.0979648	0.0913803	0.095286	0.0737913	0.132031	0.115058	0.0962443	0.15087	0.0983907	0.0996814	0.0938493	0.112596	0.105692	0.0668039	0.131363	0.0835199	0.119468	0.14699	0.0913626	0.120453	0.076717	0.104594	0.103733	0.122998	0.0865996	0.106032	0.11533	0.122586	0.0452458	0.109477	0.145632	0.153072	0.120866	0.150516
4933402D24Rik	0	0	0	0	0	0	0	0	0	0	0	0	0	0	0	0	0	0	0	0	0	0	0	0	0	0	0	0	0	0	0	0	0	0	0	0	0	0	0	0	0	0	0	0	0	0	0	0	0
Gm13749	0.00379291	0	0	0	0	0	0	0	0	0	0	0	0	0	0.00183472	0	0	0	0	0	0	0.00187791	0	0	0.00169329	0	0	0	0	0	0	0	0	0	0	0	0	0	0	0	0	0	0	0	0	0	0	0	0
Klf7	0.575732	0.66894	0.528498	0.738271	0.719423	0.734054	0.885024	0.67948	0.978817	0.8869	0.512838	0.497609	0.476868	0.60443	0.606655	0.579201	0.809559	0.890575	1.05071	1.08447	0.635613	0.648705	0.834251	1.0548	0.958297	0.516088	0.538164	0.626633	0.666653	0.652679	0.560469	0.624009	0.808367	0.679049	0.699439	0.497673	0.64782	0.475032	0.924954	0.833772	0.785345	0.738275	0.618959	0.740115	0.779624	0.0814691	0.211526	0.213121	0.237045
Gm26649	0.00683622	0.0114552	0	0.00673073	0.00345508	0.00507957	0.0276837	0.00806979	0.0103258	0.0217248	0.00526735	0.00598737	0.00708172	0.00346117	0.0174908	0.00297842	0.0123847	0.0047892	0.00943601	0.0121348	0.00585028	0.0269851	0.0115823	0.0122834	0.0127635	0.00575478	0.0157443	0.0186464	0.0156081	0.00786952	0.01124	0.0232054	0.018116	0.0317416	0.00929653	0.00701183	0.017026	0	0.00564287	0.0164538	0.00393271	0.0110578	0.0050844	0.00924696	0.0106624	0	0.0126373	0.017148	0.00271994
Gm13748	0	0	0	0	0	0	0	0	0	0	0	0	0	0	0	0	0	0	0	0	0	0	0	0	0	0	0	0	0	0	0	0	0	0	0	0	0	0	0	0	0	0	0	0	0	0	0	0	0
Gm28981	0	0	0	0	0	0	0	0	0	0	0	0	0	0	0	0	0	0	0	0	0	0	0	0	0	0	0	0	0	0	0	0	0	0	0	0	0	0	0	0	0	0	0	0	0	0	0	0	0
Creb1	0.388983	0.434089	0.354701	0.344838	0.437882	0.347339	0.368876	0.332103	0.411618	0.466591	0.338502	0.41024	0.399052	0.364186	0.463818	0.408338	0.539077	0.454293	0.568817	0.558333	0.359923	0.435946	0.461697	0.48977	0.46277	0.394823	0.34069	0.35529	0.396614	0.474437	0.524283	0.621089	0.469601	0.582713	0.491307	0.377482	0.427399	0.324807	0.532166	0.404733	0.312878	0.292778	0.342447	0.356118	0.364281	0.326814	0.27584	0.380071	0.330099
Mettl21a	0.115428	0.062133	0.0548299	0.0757293	0.186496	0.125568	0.0382011	0.0637462	0.0683484	0.111474	0.142856	0.0814312	0.08482	0.143702	0.180374	0.122899	0.0876212	0.076381	0.0433037	0.0959398	0.139742	0.088075	0.110611	0.0999415	0.155488	0.0982928	0.0702622	0.079455	0.0886417	0.130328	0.130234	0.104286	0.0743406	0.0307394	0.152702	0.0794519	0.0459124	0.0773596	0.0381048	0.129809	0.112957	0.0496211	0.0513708	0.104829	0.0813068	0.10104	0.0412671	0.0646711	0.0698894
Gm28982	0	0	0	0	0	0	0	0	0	0	0	0	0	0	0	0	0	0	0	0.001247	0	0	0	0	0.00355573	0	0	0	0	0	0	0	0	0	0	0	0	0	0	0	0	0	0	0	0	0	0	0	0
Gm29152	0	0	0	0	0	0	0	0	0	0	0	0	0	0	0	0	0	0	0	0	0	0	0	0	0	0	0	0	0	0	0	0	0	0	0	0	0	0	0	0	0	0	0	0	0	0	0	0	0
Ccnyl1	0.111452	0.0967587	0.0252462	0.0612803	0.0559512	0.110411	0.0697235	0.0662118	0.0813168	0.0638355	0.0972793	0.0887797	0.105161	0.067259	0.0538849	0.0765781	0.0671904	0.0316669	0.0995128	0.0511549	0.145294	0.161281	0.145206	0.153062	0.108962	0.0742294	0.0835823	0.0310817	0.0731166	0.0411877	0.0637458	0.0540607	0.0777971	0.0539343	0.0410065	0.151744	0.125574	0.0802659	0.116841	0.040578	0.0524189	0.0523631	0.0423905	0.0668423	0.0542807	0.0822835	0.0387084	0.0422057	0.0528867
Fzd5	0.0555676	0.084454	0.110442	0.0946183	0.0390585	0.128306	0.0292752	0.0689841	0.112999	0.0593492	0.0472584	0.0264402	0.0124101	0.0420554	0.0214852	0.0701565	0.0751516	0.0691851	0.110966	0.0399809	0.034658	0.0224739	0.0303694	0.0740607	0.0179369	0.0749354	0.0638958	0.0298283	0.0952255	0.0268248	0.0142445	0	0.0201483	0.062684	0.0372903	0.0756851	0.0346993	0.041186	0.0875199	0.0265864	0.0669369	0.0130157	0.0456778	0.107885	0.0475236	0.106436	0.0746944	0.102125	0.160542
Plekhm3	0.079877	0.044088	0.0363165	0.0508155	0.0648116	0.0659071	0.110803	0.0456999	0.0706766	0.0844082	0.0753523	0.019828	0.0558768	0.0496915	0.0617281	0.0980729	0.0560968	0.0363586	0.109773	0.0284267	0.0740845	0.0642195	0.041884	0.0340479	0.0709177	0.0584005	0.065927	0.0379155	0.0518787	0.0707641	0.111735	0.0312329	0.118777	0.0613629	0.0554103	0.0594972	0.050088	0.0632138	0.0569302	0.0642189	0.0652985	0.0576207	0.0563237	0.0426118	0.053427	0.0450816	0.0427992	0.0135298	0.0315083
Akr1cl	4.55239	5.20908	6.28324	6.46436	6.43297	11.5365	8.9743	12.9391	11.7524	13.5079	11.8921	13.4578	18.284	18.3134	16.3055	14.5704	14.2688	20.3584	18.6063	18.8952	7.47938	9.02043	8.62567	6.70432	6.90295	15.8093	14.3243	17.3664	18.6796	19.3629	13.6848	14.3477	17.3437	19.5754	19.0978	11.0847	9.89877	20.9162	19.8415	16.1462	4.0106	5.93814	7.30088	7.09438	9.28036	33.4663	46.7738	55.2374	62.7704
Cryge	0.0160558	0	0.00837468	0	0.0153779	0.0418335	0.0210221	0.0345925	0.0519057	0.0333387	0.0522402	0.0552408	0.059984	0.0579125	0.0549881	0.0300808	0.0180602	0.0397356	0.0380054	0.0187984	0.0578379	0.0327771	0.0771904	0.0484653	0.039888	0.0283725	0.0107035	0.00440585	0.0220942	0.00680656	0.0202302	0.0162107	0.0356954	0.0251314	0.0726778	0.0432585	0.0113752	0.0474732	0.0137099	0.0128077	0.0120284	0	0.00879938	0.0256574	0.0252727	0.0244164	0.0325445	0.0399734	0.0282398
Crygd	0	0	0	0	0	0	0	0	0	0	0.00118505	0	0	0	0	0	0	0	0.00406352	0.00539763	0	0	0.00206085	0	0.00239529	0.00359286	0.00425572	0.0075437	0	0	0	0	0	0	0.00126238	0	0	0	0.00700411	0	0	0	0.00356735	0	0.00324838	0	0	0	0.000976146
Crygc	0	0	0	0	0	0	0	0.00204817	0.00243949	0.00218294	0.00153864	0.00259048	0.0137909	0.0101707	0.00884274	0.00300271	0.00617693	0.0375849	0	0.0168908	0.00334396	0.0053993	0.00513335	0.00159225	0.0118705	0	0	0	0	0	0.0109172	0	0	0	0.00563984	0.0028268	0	0.00917377	0.00565545	0	0	0	0	0	0	0	0.010647	0.0103197	0.000302304
Crygb	0	0	0	0	0.00429621	0	0	0	0	0	0	0	0	0.00497551	0.0053428	0	0	0	0	0	0	0	0	0	0	0	0	0	0	0	0	0	0	0	0	0	0	0	0	0	0	0	0	0	0	0	0	0	0
Cryga	0	0	0	0	0	0	0	0	0	0	0	0	0	0	0	0	0	0	0	0	0	0	0	0	0	0	0	0	0	0	0	0.0048765	0	0	0	0	0	0	0	0	0	0	0	0	0	0	0	0	0
Gm28845	0	0	0	0	0	0	0	0	0	0	0	0	0	0	0	0	0	0	0	0	0	0	0	0	0	0	0	0	0	0	0	0	0	0	0	0	0	0	0	0	0	0	0	0	0	0	0	0	0
D630023F18Rik	0	0	0	0.00865581	0	0	0	0	0.00395665	0	0	0	0.00245223	0.00313932	0	0.00278539	0	0	0	0	0	0.00335121	0	0	0.000691124	0	0	0	0	0	0	0	0	0	0	0	0	0	0	0	0	0	0	0	0.0016095	0	0	0.00538578	0.00484639
Idh1	0.438547	0.284828	0.473667	0.426629	0.381089	0.724631	0.338561	0.551853	0.589586	0.806689	0.768254	0.448436	0.70586	0.790425	0.789878	0.716444	0.383982	0.666412	0.646087	0.825429	0.679932	0.523714	0.620499	0.536467	0.704892	0.838144	0.439841	0.66656	0.769759	0.887381	0.707024	0.481668	0.576119	0.946147	0.758257	0.597407	0.284082	0.73801	0.647609	0.680741	0.544257	0.263538	0.463738	0.505744	0.731492	2.39674	1.97004	2.27968	3.2534
Pikfyve	0.185842	0.13979	0.124918	0.260011	0.195407	0.226063	0.13597	0.135386	0.201249	0.135319	0.140179	0.123677	0.117062	0.214808	0.182531	0.148786	0.132538	0.13268	0.181846	0.24028	0.137702	0.112161	0.171668	0.222589	0.167289	0.182131	0.142606	0.114235	0.219984	0.223568	0.271185	0.135917	0.245851	0.249948	0.177682	0.182513	0.114871	0.14279	0.180955	0.15986	0.149292	0.156647	0.0945347	0.130471	0.143453	0.109789	0.163574	0.186444	0.272588
Pth2r	0	0	0	0	0	0	0	0	0	0	0	0	0	0	0.00292087	0	0	0	0	0	0	0	0	0.00285325	0	0	0	0	0	0	0	0	0	0	0	0	0	0	0	0	0	0	0	0	0	0	0	0	0
Crygf	0	0	0	0	0	0	0	0	0	0	0	0	0	0	0	0	0	0	0	0	0	0	0	0	0	0	0	0	0	0	0	0	0	0	0	0	0	0	0	0	0	0	0	0	0	0	0	0	0
Map2	0.00787617	0.00363282	0	0	0	0.0871143	0.0560664	0.0350131	0.037007	0.00973804	0.0808654	0.0256023	0.0207966	0.0240454	0.0241055	0.0217752	0.00842521	0.032123	0.00703883	0.00507399	0.0642501	0.0164368	0.0485891	0.0155838	0.0297395	0.0190132	0	0.00376629	0.00523813	0.0140369	0.0174031	0.0128066	0.0437345	0.00684772	0.0116002	0.0226474	0.0114759	0	0.00914583	0.00639003	0.0184259	0.0266095	0.0830005	0.0194327	0.0166377	0.0737262	0.0332852	0.0356497	0.0165361
Gm10558	0	0	0	0	0	0	0	0	0	0	0	0	0	0	0	0	0	0	0	0	0	0	0	0	0	0	0	0	0	0	0	0	0	0	0	0	0	0	0	0	0	0	0	0	0	0	0	0	0
Unc80	0	0	0	0	0	0	0	0	0	0	0	0	0	0	0	0	0	0	0	0	0	0	0	0	0	0	0	0	0	0	0	0	0	0	0	0	0	0	0	0	0	0.00587439	0.00365043	0	0	0	0	0	0
Rpe	0.159414	0.0803936	0.0739326	0.220384	0.209004	0.140673	0.0751047	0.0530331	0.133724	0.207225	0.190861	0.105504	0.115253	0.170544	0.165284	0.194546	0.11139	0.114447	0.17325	0.216431	0.228876	0.112908	0.0768792	0.218854	0.205147	0.197122	0.0747514	0.106104	0.176709	0.230641	0.260435	0.0566991	0.0640012	0.200661	0.218276	0.188412	0.108308	0.087894	0.141498	0.242862	0.197766	0.0972065	0.063418	0.21909	0.18616	0.229473	0.132869	0.165108	0.405851
Kansl1l	0.370844	0.299698	0.208069	0.357902	0.349336	0.340666	0.320039	0.27661	0.434438	0.399162	0.327624	0.188178	0.141486	0.238566	0.244064	0.383887	0.202804	0.218678	0.406407	0.315586	0.378663	0.219741	0.113232	0.316056	0.222089	0.203746	0.160604	0.216623	0.238356	0.207773	0.275893	0.274992	0.229025	0.503844	0.370617	0.288167	0.174284	0.155624	0.365386	0.224967	0.469494	0.319964	0.259656	0.390171	0.318314	0.238618	0.281398	0.234167	0.33667
Acadl	0.637575	0.534361	0.474979	0.642067	0.724931	0.664508	0.548247	0.480975	0.741667	0.806717	0.65938	0.520514	0.650039	0.747059	0.770653	0.565026	0.47694	0.617311	0.667756	0.851894	0.886577	0.657105	0.875856	0.93147	1.03032	0.630358	0.509545	0.687835	0.640117	0.658978	0.619121	0.580986	0.837926	0.809595	0.675933	0.617096	0.444798	0.614022	0.737804	0.699889	0.634252	0.755014	0.666662	0.817182	0.760174	2.06899	1.9292	2.67943	4.31979
Myl1	0.00582589	0	0	0	0.00446686	0	0	0	0.00238112	0	0	0.00209394	0	0	0.00267524	0	0	0	0	0	0.00300417	0	0	0.00398538	0.00230298	0	0.00615194	0	0.0147225	0	0	0	0	0.0038032	0.00149538	0.0026698	0.00322293	0	0	0.00669185	0	0	0	0.00590994	0.00460957	0	0	0	0
Lancl1	0.317697	0.391122	0.310437	0.307528	0.462683	0.273982	0.314038	0.29052	0.334707	0.326048	0.343952	0.388245	0.394977	0.367702	0.36619	0.34536	0.416828	0.45418	0.314274	0.37869	0.426989	0.453625	0.578655	0.436738	0.495198	0.341614	0.271439	0.438004	0.320872	0.309469	0.332861	0.460246	0.54192	0.443429	0.311016	0.357523	0.43948	0.354966	0.382656	0.316959	0.333236	0.256402	0.32774	0.324949	0.269831	0.251074	0.378276	0.32951	0.250715
Cps1	0	0	0	0	0.00761562	0.00209025	0.00665317	0	0.00404032	0.000650587	0	0	0	0	0	0	0	0	0	0	0	0	0	0	0	0	0	0	0	0	0	0	0	0	0	0.00358339	0	0	0	0.0022648	0	0	0	0	0	0	0	0	0
Gm15668	0	0	0	0	0	0	0	0	0	0	0	0	0	0	0	0	0	0	0	0	0	0	0	0	0	0	0	0	0	0	0	0	0	0	0	0	0	0	0	0	0	0	0	0	0	0	0	0	0
Gm15669	0	0	0	0	0	0	0	0	0	0	0	0	0	0	0	0	0	0	0	0	0	0	0	0	0	0	0	0	0	0	0	0	0	0	0	0	0	0	0	0	0	0	0	0	0	0	0	0	0
Gm15671	0	0	0	0	0	0	0	0	0	0	0	0	0	0	0	0	0	0	0	0	0	0	0	0	0	0	0	0	0	0	0	0	0	0	0	0	0	0	0	0	0	0	0	0	0	0	0	0	0
Erbb4	0	0	0	0	0	0	0	0	0	0	0	0	0	0	0	0	0	0	0	0	0	0	0	0	0	0	0	0	0	0	0	0	0	0	0	0	0	0	0	0	0	0	0	0	0	0	0	0	0
Gm28497	0	0	0	0	0	0	0	0	0	0	0	0	0	0	0	0	0	0	0	0	0	0	0	0	0	0	0	0	0	0	0	0	0	0	0	0	0	0	0	0	0	0	0	0	0	0	0	0	0
Gm29113	0	0	0	0	0	0	0	0	0	0	0	0	0	0	0	0.00350793	0	0	0	0	0	0.00187791	0	0	0	0.00272594	0	0	0	0	0	0	0	0	0	0	0	0	0	0	0	0	0	0	0	0	0	0	0
Gm29114	0	0	0	0	0	0	0	0	0	0	0	0	0	0	0	0	0	0	0	0	0	0	0	0	0	0	0	0	0	0	0	0	0	0	0	0	0	0	0.0151032	0	0	0	0	0	0	0	0	0	0
Ikzf2	0.0377105	0.0380872	0.0584099	0.0955526	0.0457001	0.0256065	0.0174242	0.0316466	0.0446637	0.0439412	0.0166842	0.00403909	0.0271409	0.0110879	0.0258577	0.0307665	0.00326693	0.0178058	0.0381645	0.0647052	0.0164709	0.0137026	0.031584	0.0224596	0.022955	0.0196326	0.00660867	0.0215422	0.0402904	0.0664745	0.0279694	0.0279079	0.0127033	0.0365618	0.0667041	0.0174788	0	0.0195684	0.0492187	0.0119109	0.0586052	0.0486557	0.0893573	0.0360539	0.0540278	0.0144885	0.00495394	0.0618594	0.0646729
Spag16	0	0	0	0	0	0	0	0	0	0	0	0	0	0	0	0	0	0	0	0	0	0	0	0	0	0	0	0	0	0	0	0	0	0	0	0	0	0	0	0	0	0	0	0	0	0	0	0	0
Vwc2l	0	0	0	0	0	0	0	0	0	0	0	0	0	0	0	0	0	0	0	0	0	0	0	0	0	0	0	0	0	0	0	0	0	0	0	0	0	0	0	0	0	0	0	0	0	0	0	0	0
Bard1	0.00454377	0.00957176	0	0.0303915	0	0.00677914	0.00451518	0.00627244	0	0.00857602	0.00342814	0.00139246	0.00422677	0	0.0100439	0	0	0.00573531	0.0120171	0.0162661	0.0131946	0.00623113	0.0103741	0.00392755	0.0028703	0.00391356	0.011468	0.0180061	0.00882265	0.0059891	0.00797001	0	0.0163476	0	0.00788779	0.0011595	0	0	0	0	0.0119201	0	0.0115076	0.00588099	0.0135123	0.0266007	0	0.00788766	0.00520336
Abca12	0	0	0	0	0	0	0	0	0	0	0.000979882	0	0	0	0	0	0	0	0	0	0	0	0	0	0	0	0	0	0	0	0	0	0	0	0	0	0	0	0	0	0	0	0	0	0	0	0	0	0
Atic	0.413696	0.481729	0.317044	0.299398	0.414974	0.356354	0.360616	0.252377	0.210603	0.317408	0.537687	0.617086	0.366841	0.489937	0.486579	0.36013	0.328133	0.225093	0.17167	0.313007	0.546638	0.620124	0.361479	0.32937	0.391564	0.423691	0.46561	0.282116	0.371991	0.384568	0.45088	0.595646	0.384788	0.328171	0.384805	0.352562	0.447492	0.321387	0.19811	0.439007	0.321791	0.314933	0.227524	0.233702	0.285832	0.333645	0.43564	0.307594	0.372755
Fn1	0.966355	0.487502	0.485008	0.441592	0.168089	1.44688	0.999106	1.26291	1.21057	0.773697	1.02886	0.739473	1.25078	2.28124	2.07662	2.05973	1.35947	3.05344	1.96202	1.79503	0.666757	0.490711	1.85495	1.60013	1.58898	2.40146	1.68905	3.19823	2.67791	2.28371	1.78121	1.44562	1.84973	1.67415	1.36817	1.48181	0.792693	1.56416	1.46321	1.1356	4.13909	2.10046	2.11529	2.13717	1.25969	2.67814	0.273224	0.0933573	0.243465
Apol7d	0.00833618	0	0	0	0	0.0111442	0.00305399	0.00910201	0.0148825	0.0049257	0.012887	0.00825308	0.00456481	0.0233961	0.00886853	0.00650001	0	0.00702415	0.00407027	0.0158039	0.00277403	0	0.00863917	0.00766719	0.00260684	0.00897464	0	0.0251297	0.0114987	0.00406917	0.0255158	0	0.0205043	0.0121298	0.00736936	0.00960137	0.00457811	0	0.00941487	0.00569107	0.0224303	0	0.00438366	0.0139013	0.00528846	0	0	0	0
Gm8883	0	0	0	0	0	0	0	0	0	0	0	0	0	0	0	0	0	0	0	0	0	0	0	0	0	0	0	0	0	0	0	0	0	0	0	0	0	0	0	0	0	0	0	0	0	0	0	0	0
Gm28818	0.0021605	0	0	0	0	0	0	0.00217315	0	0	0	0	0	0	0	0.0160948	0	0	0.00462886	0	0	0	0.00525958	0	0	0	0	0	0	0	0	0	0	0	0	0	0	0	0	0	0.0366807	0	0	0.00365104	0	0	0	0	0
4933417E11Rik	0	0	0	0	0	0	0	0	0	0.00223687	0	0	0	0	0	0	0	0	0	0.0030388	0	0	0	0	0	0	0	0	0	0	0	0	0	0	0	0	0	0	0	0	0	0	0	0	0	0	0	0	0
4930556G22Rik	0	0	0	0	0	0	0	0	0	0	0	0	0	0	0	0	0	0	0	0	0	0	0	0	0	0	0	0	0	0	0	0	0	0	0	0	0	0	0	0	0	0	0	0	0	0	0	0	0
Gm4319	0	0	0	0	0	0	0	0	0	0	0	0	0	0	0	0	0	0	0	0	0	0	0	0	0	0	0	0	0	0	0	0	0	0	0	0	0	0	0	0	0	0	0	0	0	0.00793953	0	0	0
Mreg	0	0	0	0	0	0	0	0	0	0	0	0	0	0	0.00155588	0	0	0	0	0.00367346	0	0	0	0.0109709	0	0	0	0	0	0	0	0	0	0	0	0.00213563	0	0	0	0	0	0	0	0	0	0.00875718	0.00793294	0	0.00103484
D230017M19Rik	0.0213455	0.0251837	0.0139109	0.0630889	0.0414978	0.0146191	0.0673066	0.00489369	0.0365772	0.0420522	0.0217806	0.0297386	0.0182406	0.044641	0.0225977	0.0342171	0.0446457	0.0546393	0.0623077	0.0402402	0.0293014	0.0264125	0.0154559	0.0231018	0.0170699	0.0163338	0.0267745	0.0410728	0.0271721	0.0168139	0.126173	0	0.0516775	0.0644682	0.0502473	0.0323779	0.0297362	0.00445171	0	0.0129405	0.0434519	0.00710685	0.00389257	0.032651	0.0177563	0	0.0617848	0.0173293	0.0282827
Pecr	0.186552	0.126059	0.0618274	0.187578	0.180353	0.134675	0.0765883	0.0938144	0.106591	0.118573	0.189151	0.204165	0.16757	0.170797	0.165975	0.147038	0.139195	0.0662926	0.121647	0.145917	0.190036	0.170462	0.11457	0.100707	0.114072	0.143207	0.165924	0.100659	0.110957	0.153002	0.25834	0.212375	0.0988507	0.123361	0.177857	0.164869	0.114827	0.104036	0.0810978	0.142472	0.132827	0.140165	0.106367	0.139792	0.114644	0.120655	0.232041	0.183778	0.23197
Tmem169	0	0	0.00458084	0	0	0.00202777	0	0	0	0.00159423	0.00757039	0	0	0.00396326	0.00282495	0.00646604	0	0	0	0.0135528	0.00675435	0.00227717	0	0.0060379	0.00343399	0.00619117	0	0	0	0.00631914	0	0	0	0	0.00244876	0	0	0	0	0.00954326	0.00289119	0	0	0	0.00446196	0.00774473	0	0	0
Xrcc5	0.227599	0.186557	0.147201	0.21975	0.253804	0.188792	0.159465	0.137819	0.185791	0.157324	0.301989	0.228332	0.276153	0.316	0.238941	0.216608	0.204325	0.0971472	0.14076	0.169336	0.26916	0.28105	0.238384	0.191438	0.21718	0.211915	0.158593	0.196028	0.215837	0.191086	0.257811	0.222841	0.158182	0.196589	0.225105	0.245083	0.184498	0.192559	0.195867	0.146394	0.159796	0.0854208	0.172297	0.190402	0.137776	0.17834	0.232929	0.176414	0.250058
2024-03-04	0	0	0	0	0	0	0	0	0	0	0	0	0.00181308	0	0	0	0	0	0	0	0	0	0	0	0	0	0.00216143	0	0	0	0	0	0	0	0	0	0	0	0	0	0	0	0	0	0	0	0	0	0
Smarcal1	0.0938177	0.0594889	0.0885095	0.0886798	0.0681134	0.112757	0.034866	0.0453905	0.128944	0.0977582	0.0991748	0.0439131	0.0844515	0.130295	0.0973932	0.114509	0.0459766	0.0406977	0.0662223	0.0992524	0.0901793	0.0582453	0.0442761	0.0911042	0.104219	0.11372	0.0668077	0.108811	0.123439	0.130314	0.134014	0.0639594	0.0559549	0.0722989	0.0907325	0.0795551	0.0209545	0.053903	0.0668756	0.0871102	0.0969603	0.0554406	0.0856763	0.090307	0.0851073	0.0858115	0.0786895	0.11047	0.216132
Gm39662	0	0	0	0	0	0	0	0	0	0.002597	0	0	0.00151217	0	0	0	0	0	0	0.00217777	0	0	0	0	0	0	0	0	0	0	0	0	0	0	0	0	0	0	0	0	0	0	0	0	0	0	0	0	0
Ankar	0	0	0	0	0	0	0	0	0	0	0	0	0	0	0	0	0	0	0	0	0	0	0	0	0	0	0	0	0	0	0	0	0	0	0	0	0	0	0	0	0	0	0	0	0	0	0	0	0.000683455
Rpl37a	33.8775	31.5624	34.9151	28.9505	32.8017	34.3276	35.6339	35.1326	29.5412	33.5054	40.5568	44.5202	41.3084	36.9535	40.6581	36.6893	37.4522	38.2084	28.253	32.8959	39.3024	41.2474	34.816	30.1917	35.7156	32.9751	32.7457	34.0345	26.3887	31.1555	34.5366	37.1989	39.5161	29.9148	35.9398	39.2064	37.5693	40.6926	31.696	36.2111	28.9923	31.3575	30.374	25.0032	31.254	30.3265	41.1639	35.6147	26.7465
Igfbp2	0.025219	0.0334576	0.0533361	0	0.0135122	0.0145899	0.0283633	0.00592055	0.00299619	0.0146163	0.0379664	0.0156292	0.0357374	0.0157691	0.0214341	0.0181614	0.00992684	0.0117318	0.00562752	0.0475534	0.0390778	0.0576363	0.0477526	0.0149393	0.0301391	0.0281292	0.00936197	0	0	0.00602236	0.11228	0	0.0924034	0.0202669	0.011255	0.0211774	0.0051387	0.0395423	0.0246202	0	0.0132016	0.0238684	0.00812923	0.0168903	0.0158755	0.452911	0.252475	0.212472	1.15987
Igfbp5	3.37878	0.672972	0.178289	0.163994	0.287791	2.30886	0.926962	0.640465	1.43182	0.91593	2.13593	0.602785	0.613759	0.918563	0.933004	1.36652	0.80111	0.749342	0.788227	0.832923	0.619517	0.116341	0.37161	0.211362	0.453213	2.19537	0.643714	0.494315	0.44847	0.555053	2.9611	1.31486	0.557112	0.350085	0.716738	3.82185	1.01733	0.725663	0.772331	0.595225	7.50243	1.7811	1.26342	1.94538	1.47741	0.10983	0.0659738	0.129982	0.0136429
1700027A15Rik	0	0	0	0	0	0	0	0	0	0	0	0	0	0	0	0	0	0	0	0	0	0	0	0	0	0	0	0	0	0	0	0	0	0	0	0	0	0	0	0	0	0	0	0	0	0	0	0	0
Tnp1	0	0	0	0	0	0	0	0	0	0	0	0	0	0	0	0	0	0	0	0	0	0	0	0	0	0	0	0	0	0	0	0	0	0	0	0	0	0	0	0	0	0	0	0	0	0	0	0	0
Gm29185	0	0	0	0	0	0	0	0	0	0	0	0	0	0	0	0	0	0	0	0	0	0	0	0	0	0	0	0	0	0	0	0	0	0	0	0	0	0	0	0	0	0	0	0	0	0	0	0	0
Pinc	0	0	0	0	0	0	0	0	0	0	0	0	0	0	0	0	0	0	0	0	0	0	0	0	0	0	0	0	0	0	0	0	0	0	0	0	0	0	0	0	0	0	0	0	0	0	0	0	0
D530049I02Rik	0	0	0	0	0	0	0	0	0	0	0	0	0	0	0	0	0	0	0	0	0	0	0	0	0	0	0	0	0	0	0	0	0	0	0	0	0	0	0	0	0	0	0	0	0	0	0	0	0
C530043A13Rik	0	0	0	0	0	0	0	0	0	0	0	0	0	0	0	0	0	0	0	0	0	0	0	0	0	0	0	0	0	0	0	0	0	0	0	0	0	0	0	0	0	0	0	0	0	0	0	0	0
Gm29186	0	0	0	0	0	0	0	0	0	0	0	0	0	0	0	0	0	0	0	0	0	0	0	0	0	0	0	0	0	0	0	0	0	0	0	0	0	0	0	0	0	0	0	0	0	0	0	0	0
6030407O03Rik	0.0197933	0.00214849	0	0	0	0.00762077	0.0066446	0.00851726	0	0	0.0115463	0.00582672	0.0125919	0.0320902	0.0176731	0.0115657	0.00444218	0.00966941	0.0115362	0.00538436	0.0126581	0.0125046	0.0214359	0.0210453	0.0388414	0.0228055	0.00385545	0	0.0106154	0	0.00407884	0.00497111	0	0	0.00291014	0.0211862	0.0131498	0.00452046	0.00410139	0	0.00341227	0.0130887	0	0	0.00119108	0	0.00428655	0	0.0027724
Gm29183	0	0	0	0	0	0	0	0	0	0	0.00397772	0.00294333	0	0.00188943	0	0	0	0	0.00289743	0	0	0	0.00493062	0.0125704	0.0024651	0	0.00426067	0	0	0.00250266	0	0	0	0	0	0	0	0	0	0.00405917	0.00253372	0	0	0	0	0	0	0	0
Tns1	0.850355	0.729044	0.872197	0.651061	0.562454	1.21549	0.592433	0.803749	1.19013	1.07517	0.587777	0.369186	0.438665	0.476722	0.566044	0.796737	0.5865	0.619951	0.754312	0.640736	0.611752	0.335427	0.457475	0.703016	0.778703	0.772818	0.619343	0.492764	0.66638	0.628522	0.990731	0.680634	0.988935	0.759175	0.507964	0.66072	0.498683	0.445801	0.683599	0.576646	1.6036	1.27114	1.05678	1.94341	1.58383	0.22191	0.446189	0.641707	0.366332
Rufy4	0	0	0	0	0.00636	0	0.00229994	0	0	0	0	0	0	0	0	0	0	0	0	0	0	0	0	0	0.00136303	0	0	0.00854793	0.00493959	0	0.00690211	0.0154565	0	0.00738417	0	0.00240576	0	0	0	0	0.0182044	0	0	0.00256057	0.00287278	0	0	0.0040827	0
Cxcr2	0.00343235	0.00236588	0.00464696	0.0093913	0.00398569	0.00391799	0	0	0	0.00278992	0.00200835	0.00186612	0	0.00779446	0.00160752	0.00655565	0	0.00634164	0	0.00206429	0	0.00660887	0	0.00289524	0.00617179	0.00377582	0	0.00814628	0	0	0.00435823	0	0	0	0.00244236	0.00459281	0.00393612	0.0133574	0	0	0	0	0	0	0.00126886	0.00658215	0	0	0.00225846
Cxcr1	0	0	0	0	0	0	0	0	0	0	0	0	0	0	0	0	0	0	0	0	0	0	0	0	0	0	0	0	0	0	0	0	0	0	0	0	0	0	0	0	0	0	0	0	0	0	0	0	0
Arpc2	3.20206	3.48032	2.68312	2.29593	2.36744	2.65625	3.0063	2.64134	2.52132	2.88025	2.18786	2.58642	2.14791	2.08488	2.01068	2.26155	2.14084	2.05844	1.703	2.27935	2.51568	3.54856	3.33371	2.69675	2.92461	2.77377	2.88487	2.30594	2.37224	2.36702	2.67843	2.50108	1.70917	1.68568	2.02705	2.274	2.5596	1.85313	2.03189	2.22042	4.14062	4.27865	3.52973	3.26168	3.56924	2.14862	1.97624	1.84401	2.04491
Gpbar1	0	0	0	0	0	0	0	0	0	0	0.0049052	0.00303853	0	0	0.00211016	0	0	0	0	0	0.0041147	0.00401497	0.00219622	0	0.0011635	0	0.00244481	0	0	0.00147443	0	0	0	0	0	0	0	0	0	0.0039939	0	0	0.0233741	0.00500553	0.00628558	0	0	0	0
Aamp	1.55795	2.14477	1.2908	1.0047	1.26213	1.21596	1.67861	1.20982	1.00942	1.10908	1.39844	1.86655	1.29504	1.35202	1.37186	1.3994	1.91662	1.12085	1.07359	1.29879	1.5686	2.28174	1.57857	1.31294	1.52982	1.41512	1.99471	1.28013	1.24492	1.18591	1.45405	1.85004	1.07049	1.03225	1.20676	1.36225	1.8506	1.05807	1.02712	1.21617	1.3078	1.69457	1.07902	0.999161	1.08414	1.82309	2.30767	1.47078	1.58577
Gm28364	0	0	0	0	0	0	0	0	0	0	0	0	0	0	0	0	0	0	0	0	0	0	0	0	0	0	0	0	0	0.00280872	0	0	0	0	0.00101025	0	0	0	0	0	0	0	0	0	0	0	0	0	0
Pnkd	0.697757	1.13129	0.930477	0.600338	0.927179	0.761352	1.07879	0.818492	0.718484	0.842938	0.585736	0.963754	0.75621	0.552436	0.691758	0.543057	0.901229	0.576827	0.487676	0.693404	0.611828	1.05458	0.632044	0.470128	0.658811	0.623259	0.95542	0.868137	0.627581	0.780437	0.737821	1.24238	0.74963	0.70581	0.812949	0.554911	0.933571	0.613006	0.573801	0.660862	1.14017	1.47481	1.18665	1.00219	1.05444	1.04649	1.0917	0.735609	0.75489
Tmbim1	0.493846	0.670909	0.366207	0.39302	0.355068	0.461889	0.595965	0.40773	0.519913	0.365588	0.488149	0.65941	0.393032	0.590641	0.301367	0.656598	0.598017	0.571707	0.599806	0.407269	0.650975	0.748036	0.590614	0.684519	0.500591	0.622179	0.744686	0.445744	0.620539	0.475665	0.316334	0.470523	0.258162	0.301182	0.341959	0.652145	0.792368	0.591117	0.859831	0.550312	0.359598	0.57142	0.270062	0.395234	0.342859	0.294442	0.526262	0.462344	0.414518
Catip	0.0149347	0.0159588	0	0	0.00638119	0.00816365	0.0262138	0.0214646	0.0219032	0.0133882	0.0094731	0.0113889	0.0118023	0.0245398	0.0136553	0.0283231	0.00522566	0.0163394	0.0107912	0.00966678	0.0247817	0.00482302	0.0138643	0.0225515	0.0289463	0.010745	0.00842079	0.00646171	0.0227565	0.016986	0.0185075	0	0.054724	0.00263619	0.0285751	0.0161213	0.0029747	0	0.00356068	0.0115258	0.0184465	0.00781341	0.0300001	0.0108971	0.0190596	0.0254418	0.00926364	0.00557992	0.0136183
Slc11a1	0	0	0	0	0	0	0	0.00431449	0	0.00317666	0.00390309	0	0	0	0	0	0.003606	0.00554343	0	0.00111276	0.00218302	0	0.00264454	0.00301627	0	0.00164347	0	0	0.00369385	0	0	0	0	0	0	0	0.00848002	0	0.00495788	0	0.0106766	0.0076184	0	0	0	0.0114093	0	0	0.00457263
Ctdsp1	0.39106	0.443485	0.456865	0.409235	0.516882	0.411493	0.520857	0.47105	0.569149	0.508308	0.410846	0.363516	0.343626	0.346243	0.395303	0.442087	0.378882	0.475693	0.407482	0.488469	0.389577	0.382496	0.37223	0.352511	0.423226	0.514973	0.394917	0.397207	0.380588	0.385259	0.601122	0.606754	0.649945	0.526495	0.485064	0.395303	0.497401	0.415755	0.349556	0.419877	0.447415	0.470703	0.450707	0.475816	0.558076	0.301214	0.321205	0.324823	0.264136
Vil1	0.00112681	0.00250308	0.00549622	0.0165946	0	0	0	0.00332353	0.00404032	0.000963788	0.00113322	0	0.00447952	0.00744938	0	0.00423908	0	0	0.00424351	0.00219607	0.00425724	0.00190518	0	0.00563118	0	0.0095699	0.00839185	0	0.00440288	0	0	0	0	0	0	0.00307993	0.0032984	0.00445171	0.00577806	0.00344666	0	0.00569221	0	0	0	0.00573132	0	0.00297901	0.000366119
Usp37	0.479091	0.689961	0.506691	0.49615	0.278506	0.328744	0.5475	0.433132	0.450695	0.221875	0.323398	0.394933	0.30358	0.380576	0.187807	0.33694	0.463093	0.345007	0.562558	0.248062	0.338224	0.44826	0.420333	0.462394	0.273425	0.347596	0.5205	0.401254	0.505854	0.223202	0.226448	0.20892	0.199238	0.213176	0.244178	0.385591	0.624155	0.451038	0.739216	0.317907	0.281397	0.342021	0.334251	0.235627	0.192887	0.274239	0.274714	0.344125	0.337156
Cnot9	0.0879814	0.108557	0.0781889	0.0686699	0.161753	0.055415	0.0994756	0.0788043	0.0531692	0.106737	0.120918	0.10932	0.141811	0.0835999	0.155492	0.0878075	0.0828166	0.0773161	0.102248	0.134011	0.0858301	0.103209	0.1315	0.0754147	0.100381	0.0834596	0.0998252	0.147225	0.0911455	0.127648	0.121013	0.121715	0.143229	0.0909626	0.0874969	0.070042	0.0744478	0.0569562	0.0720923	0.104986	0.0582848	0.0672168	0.109148	0.0688066	0.118397	0.112608	0.0666292	0.0899016	0.0783616
Plcd4	0.00357593	0.00746518	0	0.00566035	0	0.00238144	0.0265496	0	0.00938823	0.00427417	0.00962422	0.00700273	0.00714332	0.0100837	0.00246187	0	0.00408137	0.00268225	0.00425456	0.00490695	0	0.0124704	0.00189241	0	0.000867469	0.00536057	0	0.013048	0.00609342	0	0.010434	0.0307543	0	0.0181613	0.00323344	0.00746874	0.0118195	0.00858863	0.0113604	0	0	0	0	0.00470656	0	0	0	0	0.0034669
Zfp142	0.169528	0.218813	0.262666	0.231078	0.106436	0.181897	0.246898	0.161429	0.134589	0.126324	0.17455	0.182272	0.165391	0.107938	0.130668	0.155154	0.124168	0.259749	0.131267	0.128079	0.15686	0.220785	0.219083	0.20013	0.156598	0.14691	0.242884	0.182008	0.161947	0.0950996	0.154533	0.133229	0.159682	0.0901915	0.128254	0.176217	0.163885	0.2071	0.109523	0.10773	0.197703	0.15297	0.197897	0.155556	0.0934735	0.111754	0.212119	0.207342	0.11449
Bcs1l	0.14772	0.119344	0.13407	0.100589	0.145695	0.113503	0.128615	0.108933	0.122139	0.10077	0.137942	0.12628	0.194571	0.141887	0.135346	0.114493	0.161614	0.136454	0.0990318	0.0793192	0.177424	0.118794	0.183312	0.182704	0.119278	0.11765	0.156866	0.143835	0.123142	0.129073	0.137636	0.105451	0.134679	0.123415	0.149827	0.0975676	0.170794	0.0986307	0.139448	0.107992	0.112962	0.166202	0.137496	0.146871	0.108823	0.186765	0.193969	0.149588	0.136175
Rnf25	0.0911867	0.0875031	0.136429	0.0792432	0.129962	0.0853201	0.0499203	0.108936	0.0607053	0.110845	0.0929111	0.0926115	0.106021	0.0847848	0.116785	0.114534	0.145849	0.214261	0.102677	0.102626	0.066787	0.104357	0.11609	0.0653374	0.123618	0.10322	0.0592932	0.129344	0.0866339	0.157347	0.0712654	0.104368	0.147792	0.0616768	0.144287	0.0719081	0.128148	0.0842078	0.0505947	0.201481	0.0829857	0.120487	0.11979	0.0967656	0.157755	0.0927402	0.115595	0.154607	0.101801
Stk36	0.0128822	0.0341328	0.0194686	0	0.0202676	0.018867	0.013151	0.0232036	0.0218024	0.0196124	0.0100992	0.00948768	0.0196215	0.0110289	0.0134793	0.0200817	0.00379449	0.0277408	0.00786277	0.0105215	0.00964449	0.0133394	0.0183803	0.0112879	0.010648	0.00234239	0.0161382	0.0116736	0.0283803	0.00341109	0.019792	0.00694999	0.0147628	0.0204677	0.0130879	0.0180499	0.0156818	0.0083449	0.0305549	0.0152408	0.0110232	0.0220288	0.0121674	0.0153086	0.0225977	0	0.0365474	0.00817167	0.00512275
Ttll4	0.0917928	0.102673	0.0634245	0.0831916	0.0722115	0.0529893	0.0447317	0.0563956	0.0609819	0.0748593	0.0621675	0.0630931	0.0715469	0.0866888	0.115799	0.130859	0.0595564	0.0482022	0.077292	0.0707045	0.0702738	0.0684502	0.0602296	0.0791227	0.0886359	0.0720067	0.0990136	0.0865115	0.0787609	0.08215	0.0721986	0.068269	0.0364985	0.104134	0.0640417	0.0834271	0.0582024	0.0365187	0.116189	0.0474738	0.0397148	0.0659737	0.0469557	0.0834961	0.0611077	0.163808	0.158082	0.106638	0.157848
Cyp27a1	0.236415	0.209261	0.243064	0.241588	0.328327	0.254181	0.109406	0.14867	0.276864	0.220267	0.308728	0.115509	0.104725	0.202554	0.129845	0.318433	0.19697	0.187291	0.293874	0.271395	0.414012	0.0795364	0.0995786	0.324926	0.297622	0.197968	0.196941	0.210024	0.244063	0.27581	0.280991	0.165057	0.298826	0.426121	0.280847	0.261817	0.1599	0.178607	0.286684	0.267893	0.0608912	0.0669761	0.0902035	0.204937	0.174133	0.021384	0.0126904	0.0416526	0.0101286
Prkag3	0	0.00092321	0	0	0	0.00446871	0	0	0	0.00160274	0.0108078	0	0.00205625	0.00193289	0.0011515	0.00415034	0	0	0	0	0.0116319	0.00250937	0	0	0.0013964	0	0	0	0.00313696	0	0	0	0	0	0	0	0	0	0	0	0.00600234	0	0	0.00281502	0.00319612	0.00536596	0	0	0.000766431
Wnt6	0.0653167	0.0551534	0.0399969	0.0166501	0.0709288	0.0529764	0.0433758	0.0283924	0.0378729	0.0347971	0.05368	0.0443867	0.0737903	0.0474004	0.0327661	0.0693729	0.0372673	0.109827	0.0697216	0.0338722	0.112874	0.0469949	0.12917	0.176962	0.143114	0.0264633	0.0219429	0.03968	0.0565945	0.023343	0.0153408	0.0776873	0.0234619	0.0725529	0.0472122	0.0352175	0.0384804	0.0561093	0.0263043	0.0228603	0.0367184	0.0852441	0.0365843	0.0600441	0.0272523	2.20291	2.34957	2.00203	2.5358
Gm29539	0	0	0	0	0	0	0	0	0	0	0	0	0	0.00172402	0	0.00186498	0	0	0	0	0	0	0	0	0	0	0	0	0	0	0	0	0	0	0	0	0	0	0	0	0	0	0	0	0	0	0.00615586	0.00736168	0.00772328
Wnt10a	0	0	0	0	0	0	0	0	0	0	0	0	0	0	0	0	0	0	0	0	0	0	0	0.0113631	0	0	0	0	0	0	0	0	0	0	0	0	0	0	0	0	0	0	0	0	0	0	0	0	0.00359866
Cdk5r2	0	0	0	0	0	0	0	0	0	0	0	0	0	0	0	0.00580307	0	0	0	0.00135649	0	0	0	0	0	0	0	0	0	0	0	0	0	0	0	0	0	0	0	0.00398619	0	0	0	0	0	0	0	0	0
Fev	0	0	0	0	0	0	0	0	0	0	0	0	0	0	0	0	0	0	0	0	0	0	0	0	0	0	0	0	0	0	0	0	0	0	0	0	0	0	0	0	0	0	0	0	0	0	0	0	0
Cryba2	0	0	0	0	0	0	0	0	0	0	0	0	0	0	0	0	0	0	0	0	0	0	0	0	0	0	0	0	0	0	0	0	0	0	0	0	0	0	0	0	0	0	0	0	0	0	0	0	0
Cfap65	0	0	0	0	0	0	0	0	0	0	0	0	0	0	0	0	0	0	0	0	0	0	0	0	0	0	0	0	0	0	0	0	0	0	0	0	0	0	0	0	0	0	0	0	0	0	0	0	0
Gm15841	0	0	0	0	0	0	0	0	0	0	0	0	0	0	0	0	0	0	0	0	0	0	0	0	0	0	0	0	0	0	0	0	0	0	0	0	0	0	0	0	0	0	0	0	0	0	0	0	0
Ihh	0.0105121	0.0263435	0.0108446	0.00868833	0.0297997	0.00893794	0.017952	0.033302	0.00352237	0.0242426	0.0125803	0.0139074	0.0111903	0.0172524	0.0128359	0.00858112	0.0328338	0.00353505	0.0172081	0.0167977	0.0246811	0.0117504	0.0242544	0.00365161	0.0112374	0.0078664	0.0187769	0	0.00488174	0.00805807	0.0202094	0.0409329	0.0212412	0	0.00898483	0.0128076	0.0236293	0.0091797	0.00774897	0.0208154	0.0135058	0.0218893	0.0144839	0.0201154	0.0133319	0	0	0.0187847	0.00249889
Nhej1	0.0484128	0.0452518	0.0567732	0.00673073	0.0382404	0.0290889	0.0343518	0.046955	0.0503552	0.0655361	0.0423798	0.0520259	0.0564034	0.0478171	0.0383343	0.0416292	0.0573288	0.0516507	0.00699812	0.08487	0.0356975	0.048072	0.0575373	0.0335316	0.0287442	0.0556907	0.0566663	0.0379546	0.0438224	0.029744	0.0258122	0.0981324	0.0351367	0.0721495	0.0479546	0.0347779	0.0264172	0.0123835	0.03234	0.0381911	0.0532618	0.050462	0.0661793	0.0559927	0.0599652	0.033712	0.0333029	0.0582469	0.0279345
Slc23a3	0.0325718	0.0161087	0.0275096	0.018009	0.00474082	0.0251109	0.013714	0.0125153	0.0266584	0.00430468	0.00607759	0.00987327	0.00735765	0.0144717	0	0.0350198	0.00900965	0.0141473	0.0125263	0	0.00436836	0.0162517	0.00826601	0.0205196	0.00610527	0.0110982	0.00893957	0.0255105	0.00927085	0.00124373	0.00450259	0.0433302	0	0	0.00339726	0.02955	0.0197595	0.0193684	0.0233265	0.0266508	0.00510833	0	0	0.00445668	0.00596887	0.0114093	0.00428655	0.0108979	0.00314216
Cnppd1	0.239364	0.285303	0.326181	0.226085	0.274002	0.207305	0.18436	0.261149	0.285012	0.274916	0.213704	0.218029	0.21693	0.212988	0.178229	0.238415	0.404947	0.313475	0.315071	0.291097	0.247383	0.197419	0.279956	0.29473	0.226149	0.21419	0.262932	0.202778	0.234694	0.202958	0.133088	0.193745	0.316758	0.175311	0.22882	0.243506	0.302288	0.26816	0.356652	0.337394	0.204724	0.186739	0.228702	0.186401	0.164915	0.172973	0.282554	0.24816	0.160157
Retreg2	0.383884	0.643551	0.611247	0.388374	0.55711	0.261076	0.325854	0.436245	0.202694	0.400541	0.298131	0.380044	0.48785	0.317074	0.385543	0.344301	0.463749	0.580322	0.386942	0.493482	0.326292	0.434793	0.538733	0.399986	0.462109	0.405033	0.609896	0.494018	0.311036	0.389099	0.342266	0.432506	0.668626	0.434031	0.56176	0.360285	0.455706	0.589023	0.316144	0.416545	0.311389	0.354522	0.392097	0.254589	0.294309	0.300072	0.453303	0.555583	0.341701
Zfand2b	0.133471	0.184507	0.273365	0.174815	0.242719	0.147264	0.200959	0.212231	0.157305	0.183576	0.168814	0.204104	0.254703	0.133172	0.177288	0.246046	0.225232	0.277955	0.213399	0.209437	0.137374	0.191582	0.212417	0.161577	0.200462	0.175866	0.168572	0.206004	0.14041	0.193966	0.151705	0.280944	0.375208	0.160035	0.244392	0.135439	0.198347	0.258653	0.159277	0.190797	0.139789	0.172125	0.168403	0.209837	0.202407	0.223004	0.258764	0.269999	0.159634
Abcb6	0.0596734	0.0794991	0.0812388	0.0670556	0.0753724	0.0764914	0.050023	0.0589691	0.0239175	0.0593294	0.0940386	0.0796149	0.0826998	0.113076	0.0850575	0.0970649	0.111978	0.0426381	0.0452984	0.0399079	0.120556	0.0901112	0.0767426	0.0840952	0.0835993	0.0937653	0.065821	0.0880908	0.0623252	0.0564036	0.05593	0.0582293	0.0202305	0.113407	0.125374	0.0940751	0.0827074	0.0654348	0.0369608	0.0848569	0.0443178	0.0369388	0.0525831	0.085078	0.0646575	0.180434	0.097139	0.124088	0.0998455
Atg9a	0.132036	0.219463	0.144374	0.162369	0.182965	0.0969084	0.168042	0.209176	0.162881	0.111889	0.129835	0.154913	0.17971	0.131128	0.111602	0.177096	0.203214	0.137281	0.213339	0.103415	0.149498	0.187654	0.172652	0.160123	0.158978	0.153235	0.218638	0.227385	0.210452	0.12804	0.0969009	0.210084	0.187032	0.31603	0.194871	0.133364	0.110157	0.12625	0.126067	0.201335	0.208457	0.237249	0.1903	0.204826	0.107319	0.104654	0.184446	0.174505	0.109889
Ankzf1	0.0613752	0.103323	0.143437	0.0491642	0.151809	0.0850592	0.0615793	0.0512225	0.0672692	0.108795	0.065839	0.0636113	0.0853608	0.0939166	0.124228	0.0730412	0.137601	0.0432622	0.0621422	0.121374	0.0551983	0.0724643	0.0775749	0.0496549	0.079825	0.0502993	0.0578585	0.0726054	0.0709721	0.0640857	0.046701	0.11708	0.080469	0.0967744	0.162453	0.0385417	0.0505741	0.0351487	0.0602121	0.161372	0.0703941	0.0582057	0.086914	0.0741494	0.042474	0.123999	0.168839	0.154139	0.0998191
Glb1l	0.0848263	0.0560617	0.120553	0.145982	0.080028	0.0712547	0.129413	0.0788896	0.122145	0.0788069	0.104225	0.058196	0.112147	0.0759911	0.0764544	0.0561922	0.0761616	0.0970755	0.0550603	0.0630509	0.0596503	0.0510111	0.101115	0.0999123	0.0799272	0.102551	0.0744713	0.0776615	0.146086	0.103687	0.0950697	0.101053	0.0520623	0.103257	0.0941709	0.0750554	0.0652077	0.120784	0.0906781	0.0808999	0.0815	0.0476702	0.0797663	0.0949553	0.0719396	0.0921754	0.0524807	0.0505766	0.0599004
Stk16	0.353035	0.434675	0.331118	0.308734	0.505199	0.391291	0.386227	0.372728	0.380964	0.509334	0.391559	0.47989	0.561564	0.437272	0.553231	0.311539	0.403391	0.401966	0.237962	0.482422	0.382299	0.537671	0.451117	0.389396	0.52587	0.502696	0.464895	0.434607	0.334244	0.523381	0.581404	0.615584	0.537603	0.359104	0.679298	0.350355	0.346774	0.479563	0.337937	0.48473	0.550806	0.512692	0.430904	0.44747	0.45384	0.649657	0.732987	0.522746	0.501584
Tuba4a	0.0746824	0.274306	0.314353	0.201004	0.100096	0.0466642	0.307726	0.275948	0.19788	0.127896	0.0354948	0.129865	0.0718949	0.0278122	0.0366501	0.0218068	0.218632	0.134029	0.155268	0.103856	0.0102054	0.114007	0.038821	0.105115	0.0183762	0.0278739	0.170616	0.216617	0.148272	0.0453795	0	0.085105	0.0388632	0.0237278	0.0196761	0.11677	0.512326	0.307386	0.272686	0.149202	0.0542759	0.0823258	0.170079	0.144974	0.0775173	0.0281928	0.0457797	0.0572816	0.0603891
A630095N17Rik	0	0	0	0	0	0	0	0	0	0	0	0	0	0	0	0	0	0	0	0	0	0	0	0	0	0	0	0	0	0	0	0	0	0	0	0	0	0	0	0	0	0	0	0	0	0	0	0	0
Dnajb2	0.252496	0.45984	0.476183	0.263187	0.405365	0.246118	0.342775	0.270732	0.339068	0.396135	0.200236	0.305764	0.202792	0.18111	0.164157	0.212011	0.197026	0.278167	0.277853	0.338516	0.169146	0.284765	0.344972	0.260505	0.247544	0.229497	0.448202	0.289241	0.291455	0.326064	0.219928	0.324361	0.261709	0.231222	0.327399	0.255755	0.453736	0.287975	0.412321	0.284002	0.271999	0.386386	0.367264	0.272727	0.317671	0.185239	0.238546	0.222065	0.244373
Ptprn	0.00553672	0.0164243	0.00662737	0	0	0	0.0123197	0.00914805	0.00742298	0.0133033	0.00113322	0.00792804	0.00316163	0.00520816	0.00384391	0	0	0.0130339	0.0173044	0.00317302	0.0217962	0.0146895	0.0299673	0.0247962	0.00791336	0.00483085	0.00866259	0.00997815	0.0165264	0.00379761	0	0	0	0	0	0	0.00320353	0.0124123	0.0190359	0.00954872	0.00842803	0.010953	0	0	0	0	0.00278774	0.00323029	0.00159725
Gm28294	0	0	0	0	0	0	0	0	0	0	0	0	0	0	0	0	0	0	0	0	0	0	0	0	0	0	0.00442843	0	0	0	0	0	0	0	0	0	0	0	0	0	0	0	0	0	0	0	0	0	0
Resp18	0.00172053	0	0	0	0	0	0	0	0	0	0	0	0	0	0	0	0	0	0	0	0	0	0	0	0	0	0	0	0	0	0	0	0	0	0	0	0	0	0	0	0	0	0	0	0	0	0	0	0
Gm28902	0	0	0	0	0	0	0	0	0	0	0	0	0	0	0	0	0	0	0	0	0	0	0	0	0	0	0	0	0	0	0	0	0	0	0	0	0	0	0	0	0	0	0	0	0	0	0	0	0
Dnpep	0.379092	0.410289	0.413621	0.416681	0.462176	0.506914	0.401342	0.571534	0.5587	0.509805	0.472587	0.51429	0.648135	0.53876	0.606823	0.556197	0.428792	0.597852	0.42285	0.61297	0.448473	0.498452	0.54266	0.60633	0.544035	0.521126	0.505926	0.645385	0.624791	0.645255	0.520991	0.573268	0.751862	0.466338	0.648735	0.372132	0.406452	0.540491	0.50212	0.472987	0.46308	0.455937	0.68502	0.758934	0.590779	0.924342	0.780369	0.710479	0.665928
Des	0.100727	0.120993	0.0999282	0.067854	0.0595798	0.203816	0.0821196	0.0771474	0.0509131	0.03895	0.247593	0.165805	0.233289	0.271067	0.213514	0.223673	0.0661236	0.18202	0.183195	0.134451	0.687669	0.609765	0.782932	0.670312	0.716677	0.120024	0.087878	0.098168	0.0767157	0.0592044	0.227195	0.017511	0.0721175	0.140078	0.0946386	0.0596001	0.0626976	0.013325	0.0625319	0.0312906	5.22871	6.21593	2.57455	2.9288	0.49366	0	0.0331498	0.0129776	0.00437819
Gm15179	0	0	0	0	0	0	0	0	0	0	0	0	0	0	0	0	0	0	0	0	0	0	0	0.00236818	0	0	0	0	0	0	0	0	0	0	0	0	0	0	0	0	0	0	0	0	0	0	0	0	0
Speg	0.0920764	0.0974325	0.0756063	0.0603566	0.0732352	0.388813	0.359369	0.49384	0.438451	0.392449	0.117858	0.0884947	0.187858	0.0994261	0.122539	0.144287	0.103243	0.156726	0.127765	0.107238	0.150182	0.145619	0.167123	0.158238	0.161591	0.103204	0.104176	0.131125	0.0887485	0.121026	0.184537	0.104424	0.0661982	0.102046	0.108777	0.103656	0.0714287	0.099729	0.0905684	0.110225	1.05627	0.933973	0.821479	0.751635	0.714654	0.108204	0.0259034	0.0436453	0.016626
Gm15178	0	0	0	0	0	0	0	0	0	0	0	0	0	0	0	0	0	0	0	0	0	0	0	0	0	0	0	0	0	0	0	0	0	0	0	0	0	0	0	0	0	0	0	0.0026059	0	0	0	0	0
Gmppa	0.172042	0.198397	0.218494	0.182554	0.163078	0.170318	0.210453	0.205564	0.163863	0.15971	0.249958	0.242356	0.331224	0.199367	0.20488	0.17764	0.291475	0.134563	0.190604	0.198973	0.254851	0.267112	0.260759	0.196774	0.214207	0.226304	0.33542	0.24478	0.207575	0.233502	0.217689	0.264377	0.282371	0.273693	0.188996	0.171638	0.178476	0.237049	0.188781	0.170515	0.232751	0.308052	0.340282	0.198195	0.171656	0.216917	0.234741	0.248241	0.176075
Asic4	0	0	0	0	0	0	0	0	0	0	0	0	0	0	0	0	0	0	0	0	0	0.00230796	0	0	0	0	0	0	0	0	0	0	0	0	0.00119206	0	0	0	0.00840304	0	0.00607312	0	0	0	0	0	0	0	0.00380039
Chpf	0.355921	0.528531	0.403289	0.221204	0.346025	0.440817	0.46065	0.439707	0.313514	0.325467	0.562217	0.680193	0.66614	0.445282	0.574006	0.577035	0.656109	0.45305	0.280359	0.495614	0.710611	1.07631	0.994548	0.516616	0.748919	0.659673	0.834948	0.730071	0.458772	0.497527	0.546449	0.583741	0.4651	0.356882	0.379603	0.515031	0.728432	0.475535	0.279077	0.519182	0.460175	0.464826	0.35895	0.251903	0.293729	0.404626	0.439312	0.321766	0.29118
Obsl1	0.475554	0.477572	0.508664	0.35612	0.426832	0.355864	0.282874	0.24588	0.147792	0.158534	0.310809	0.261741	0.278713	0.16146	0.241302	0.366511	0.379411	0.262725	0.153755	0.195717	0.232185	0.244258	0.259926	0.164898	0.176988	0.353535	0.458789	0.449979	0.224652	0.322089	0.419919	0.32677	0.413715	0.261763	0.269251	0.322468	0.364917	0.317203	0.153103	0.271784	0.312073	0.275131	0.210692	0.134619	0.118218	0.845522	0.580866	0.671932	0.507995
Tmem198	0.0132578	0.0240547	0.0324815	0.0153436	0.0210112	0.00633642	0.0237399	0.0348848	0.00958009	0.0250115	0.0108145	0.0266572	0.022319	0.00295438	0.00687116	0.00829664	0.00251955	0.0180621	0.00816725	0.0227818	0.0208584	0.0176374	0.0240994	0.011439	0.0337766	0.0115593	0.00836345	0.00499781	0.00900189	0.0227625	0.0121381	0.0273185	0.00670399	0	0.00506112	0.031326	0.135977	0.0306293	0.0397033	0.0330217	0.0128989	0.00885306	0.0185823	0.0140514	0.015171	0.010692	0.0272818	0.0529846	0.0123948
Inha	0.521241	1.33075	1.81851	0.47052	0.940964	0.474275	1.20827	1.52631	0.323455	0.774381	0.393065	0.696229	1.16796	0.197161	0.457862	0.443735	1.29571	2.18574	0.453398	0.963537	0.379657	0.741906	1.32236	0.228446	0.618357	0.448441	0.955571	1.57801	0.269743	0.661898	0.739036	1.45249	2.39353	0.34054	0.983821	0.46009	1.11733	1.61832	0.364804	0.865376	0.376952	0.904305	1.30998	0.272937	0.601	4.48868	1.73824	2.51803	9.29523
Stk11ip	0.0291998	0.0200107	0.0109004	0.00491777	0.00921822	0.0340507	0.0236714	0.040878	0.0276568	0.034474	0.0378476	0.0324081	0.0464537	0.0291114	0.0639347	0.0465132	0.0056806	0.0333261	0.04778	0.0182338	0.0483887	0.0288659	0.0585104	0.0437141	0.0419374	0.0381462	0.0283405	0.0298715	0.02451	0.0415433	0.0301855	0.0359987	0.0155056	0.017675	0.0325411	0.0404018	0.0222233	0.0218259	0.023998	0.0308331	0.0634991	0.0271892	0.0280932	0.0164779	0.0200118	0.00536596	0.055277	0.0471728	0.0431411
Slc4a3	0.142241	0.234788	0.277933	0.179842	0.112754	0.320532	0.234372	0.107478	0.136597	0.0934624	0.0847715	0.0863673	0.0857972	0.0443877	0.065092	0.16093	0.132428	0.111587	0.0502056	0.0520116	0.0919709	0.0653535	0.0641918	0.0599471	0.0401767	0.129295	0.134761	0.17062	0.105962	0.114945	0.0813922	0.236382	0.224161	0.0914545	0.0864907	0.120011	0.175975	0.112708	0.0673771	0.106309	0.506212	0.315134	0.337334	0.179124	0.124172	0.0602341	0.161285	0.0999327	0.131793
Gm29065	0	0	0	0	0	0	0	0	0	0	0	0	0	0	0	0	0	0	0	0	0	0	0	0	0	0	0	0	0	0	0	0	0	0	0	0	0	0	0	0	0	0	0	0	0	0	0	0	0
Gm29069	0	0	0	0	0	0	0	0	0	0	0	0	0	0	0	0	0	0	0	0	0	0	0	0	0	0	0	0	0	0	0	0	0	0	0	0	0	0	0	0	0	0	0	0	0	0	0	0	0
Gm17751	0	0	0	0	0	0	0	0	0	0	0	0	0	0	0	0	0	0	0	0	0	0	0	0	0	0	0	0	0	0	0	0	0	0	0	0	0	0	0	0	0	0	0	0	0	0	0	0	0
Gm816	0	0	0	0	0	0	0	0	0	0	0	0.00148395	0	0	0	0	0	0	0	0	0	0	0	0	0	0	0	0	0	0	0	0	0	0	0	0	0	0	0	0	0	0	0	0	0	0	0	0	0
Epha4	0.0298434	0.0481371	0.0247706	0.0215159	0.0134482	0.0214361	0.00896738	0.0140512	0.0310009	0.00878126	0.0332653	0.0169299	0.0240371	0.0214256	0.00321791	0.0362819	0.069373	0.0436647	0.0454145	0.0757494	0.0139515	0.00559794	0.0479484	0.0277611	0.0129373	0.0402726	0.0627268	0.0838904	0.0810136	0.0457837	0.020281	0.0510525	0.032263	0.0592	0.065203	0.0434416	0.0399956	0.0616645	0.0668924	0.0409344	0.0225906	0.0456577	0.0242666	0.0174372	0.0051195	0.20949	0.0290073	0.0459365	0.0588472
Gm28386	0	0	0	0	0	0.0117704	0	0	0.00468263	0	0	0	0	0	0	0	0	0	0	0	0	0	0	0	0	0.00379675	0	0	0	0	0	0	0.0140956	0.00395441	0	0	0	0.00959494	0	0	0	0	0	0	0	0	0	0	0
Gm28387	0	0	0	0	0	0	0	0	0	0	0	0	0	0	0	0	0	0	0	0	0	0	0	0	0	0	0	0	0	0	0	0	0	0	0	0	0	0	0	0	0	0	0	0	0	0	0	0	0
Pax3	0	0	0	0	0	0	0	0	0	0	0	0	0	0	0	0	0	0	0	0	0	0	0	0	0	0	0	0	0	0	0	0	0	0	0	0	0	0	0	0	0	0	0	0	0	0	0	0	0
Sgpp2	0.00233761	0	0.0232906	0	0	0	0	0.00397227	0.00527361	0.00342288	0	0	0.00155385	0.00359712	0.00170299	0	0	0	0	0.00577601	0.0174362	0	0.0024449	0	0	0	0	0	0	0.00767911	0	0	0.0129271	0	0.00467103	0	0	0.00362789	0	0	0	0	0.00753693	0.00205211	0.0123236	0	0	0.00828384	0.0018405
Gm28410	0	0	0	0	0	0	0.00320103	0.00530102	0	0	0	0	0	0	0.0030275	0	0.0045384	0	0	0	0	0	0	0	0	0	0	0	0.0035298	0	0	0	0	0	0.00118266	0	0	0	0	0.0037365	0	0	0	0	0	0.0244918	0	0	0.00418934
Farsb	0.226957	0.327394	0.349517	0.186144	0.355724	0.191929	0.205556	0.199425	0.19448	0.30725	0.274025	0.32717	0.285803	0.259868	0.223793	0.22685	0.310395	0.205979	0.190465	0.23658	0.274053	0.359112	0.32712	0.269524	0.262688	0.236738	0.297686	0.272491	0.222423	0.293014	0.233887	0.301315	0.2789	0.201186	0.282805	0.200759	0.218824	0.208445	0.144715	0.263794	0.214735	0.190137	0.266081	0.224893	0.218888	0.275353	0.171773	0.251165	0.238924
BC035947	0	0	0	0	0	0	0	0	0	0	0	0	0	0	0	0	0	0	0	0	0	0	0	0	0	0	0	0	0	0	0	0	0	0	0	0	0	0	0	0	0	0	0	0	0	0	0	0	0
Mogat1	0	0	0	0	0	0	0	0	0	0	0	0	0	0	0	0	0	0	0.00371033	0.00323782	0	0	0	0	0	0	0	0	0	0	0	0	0	0	0	0	0	0	0	0	0	0	0	0	0	0	0	0	0.000777145
5730419F03Rik	0	0	0	0	0	0	0	0	0	0	0	0	0	0	0	0	0	0	0	0	0	0	0	0	0	0	0	0	0	0	0	0	0	0	0	0	0	0	0	0	0	0	0	0	0	0	0	0	0
Gm29611	0	0	0	0	0	0	0	0	0	0	0	0	0	0	0	0	0	0	0	0	0	0	0	0	0	0	0	0	0	0	0	0	0	0	0	0	0	0	0	0	0	0	0	0	0	0	0	0	0
Acsl3	0.322682	0.314513	0.224082	0.242991	0.159997	0.338088	0.283468	0.21242	0.236804	0.201897	0.277828	0.217914	0.205234	0.139153	0.129311	0.319496	0.151033	0.166756	0.300621	0.237369	0.256283	0.182657	0.2086	0.288946	0.177261	0.264947	0.260865	0.174518	0.188519	0.189134	0.346945	0.118735	0.0739388	0.205449	0.16285	0.342092	0.319963	0.158369	0.225144	0.148954	0.279309	0.232393	0.215996	0.161425	0.199371	0.526517	0.536212	0.902742	0.550085
Utp14b	0.315016	0.348829	0.238475	0.308927	0.0747457	0.26477	0.239179	0.243853	0.251713	0.0881603	0.209903	0.174439	0.194563	0.2159	0.062715	0.242612	0.194422	0.240397	0.397563	0.0931691	0.261246	0.215411	0.199623	0.234735	0.0758311	0.182601	0.162365	0.144138	0.151839	0.0658704	0.0552839	0.041997	0.123968	0.1454	0.0607347	0.249653	0.237859	0.153619	0.358523	0.127862	0.19119	0.181377	0.152973	0.134767	0.106276	0.194068	0.407193	0.52484	0.575523
Gm29536	0	0	0	0	0	0	0	0	0	0	0	0	0	0	0	0	0	0	0	0	0	0	0	0	0	0	0	0	0	0	0	0	0	0	0	0	0	0	0	0	0	0	0	0	0	0	0	0	0
Kcne4	0.00808783	0.00853163	0.00363616	0	0.00874046	0.158489	0.141264	0.148782	0.12604	0.134488	0.0415844	0.0979014	0.2129	0.180224	0.164656	0.0452307	0.0440989	0.127277	0.180711	0.119129	0.0896201	0.0316312	0.174229	0.120114	0.112317	0.0124005	0.038052	0.0236313	0.05299	0.0173954	0.0191988	0.00885112	0.0449991	0.0499577	0.0405336	0.0435033	0.0745079	0.0939773	0.134161	0.0528362	0.0165368	0.13406	0.220137	0.149361	0.191865	0.00345975	0.0056554	0	0.000611954
Gm29187	0	0	0	0	0	0	0	0	0.00422096	0	0	0	0	0.00220877	0	0	0	0	0	0	0	0	0	0	0	0	0	0	0	0	0	0.0156128	0	0	0	0	0	0	0	0	0	0	0	0.00198948	0	0	0	0	0
Scg2	0	0	0	0	0	0	0	0	0	0	0	0	0	0	0	0	0	0	0	0	0	0.00389905	0	0	0	0	0	0	0	0	0	0	0	0	0	0	0	0	0	0	0	0	0	0	0	0	0	0	0
Ap1s3	0	0	0	0	0	0	0	0	0	0	0	0	0	0	0	0	0	0	0	0	0	0	0	0	0	0	0	0	0	0	0	0	0	0	0	0	0	0	0	0	0	0	0	0	0	0	0	0	0
Wdfy1	0.0830281	0.11565	0.0744913	0.0688406	0.106075	0.107262	0.0848804	0.109279	0.129259	0.10709	0.0815808	0.0906867	0.0768245	0.136568	0.0794734	0.0790567	0.103916	0.146516	0.102566	0.137866	0.108518	0.127601	0.173488	0.157736	0.160197	0.0918484	0.0770726	0.101965	0.0863845	0.0779431	0.183832	0.0780033	0.121624	0.176683	0.0959094	0.0997243	0.115197	0.0804014	0.104878	0.168328	0.135477	0.10954	0.0834727	0.100775	0.0537663	0.161098	0.0659381	0.0792439	0.0644652
Mrpl44	0.0733501	0.0412447	0.0933078	0.0343903	0.161729	0.0981117	0.0358081	0.047553	0.0901778	0.201249	0.074162	0.0639897	0.0916599	0.0808209	0.136613	0.0538696	0.0332681	0.0656566	0.0453674	0.131391	0.0579479	0.0412593	0.0729776	0.0604882	0.142995	0.066982	0.0559536	0.0934131	0.0816459	0.138648	0.158617	0.266592	0.118037	0.0792463	0.166315	0.0195368	0.0209121	0.0928623	0.0362206	0.0968702	0.103815	0.0816864	0.0734592	0.128753	0.163241	0.184623	0.11014	0.141706	0.232996
Serpine2	2.37277	1.6552	1.68849	1.60788	1.85366	2.05494	1.54352	1.62439	1.12401	1.48915	0.986836	0.803315	0.806215	0.761217	0.835889	1.70808	1.43666	1.08346	0.9713	1.32528	0.540727	0.483318	0.747783	0.403234	0.527092	3.03198	2.23194	2.18862	2.0992	2.84205	2.50265	2.21954	2.25103	1.56214	2.02873	2.37418	2.05909	1.87724	1.86786	2.37695	1.06535	1.09806	1.03011	0.803632	0.843103	0.488814	0.237104	0.302138	0.0862614
9830004L10Rik	0	0	0	0	0	0	0	0	0	0	0	0	0	0	0	0	0	0	0	0	0	0	0	0	0	0	0	0	0	0	0	0	0	0	0	0	0	0	0	0	0	0	0	0	0	0	0	0	0
Fam124b	0	0	0	0	0	0	0	0	0	0	0.00155004	0	0	0	0	0	0	0	0	0	0	0	0	0	0	0	0	0	0	0	0.0174182	0	0	0	0	0	0	0	0	0	0	0	0	0	0	0	0	0	0
2310015K22Rik	0	0	0	0	0	0	0	0	0	0	0	0	0	0	0	0	0	0	0	0	0	0	0	0	0	0	0	0	0	0	0	0	0	0	0	0	0	0	0	0	0	0	0	0	0	0	0	0	0
Cul3	1.0208	0.913444	0.723447	0.851408	0.854633	0.821113	0.882691	0.676646	0.825879	0.829489	0.839488	0.81193	0.675709	0.852799	0.738766	1.01766	0.756819	0.863136	0.947886	0.874535	1.06162	0.915585	0.934245	0.98322	0.879287	0.933323	0.855483	0.656124	0.727954	0.738032	0.706531	0.894588	0.612924	0.69236	0.78957	1.04642	0.929588	0.836758	1.14952	0.864002	0.898544	0.818663	0.654628	0.818921	0.707644	1.01321	0.935212	0.796888	0.919748
Gm29125	0.00152225	0	0	0	0	0	0	0	0	0	0	0	0	0	0	0	0	0	0	0	0	0	0	0	0	0	0	0	0	0	0	0	0	0	0	0	0	0	0	0	0	0	0	0	0	0	0	0	0
1700016L21Rik	0	0	0	0	0	0	0	0	0	0	0	0	0	0	0	0	0	0	0	0	0	0	0	0	0	0	0	0	0	0	0	0	0	0	0	0	0	0	0	0	0	0	0	0	0	0	0	0	0
Gm45261	0	0	0	0	0	0	0	0	0	0	0	0	0	0	0	0	0	0	0	0	0	0	0	0	0	0	0	0	0	0	0	0	0	0	0	0	0	0	0	0	0	0	0	0	0	0	0	0	0
Dock10	0.0353978	0.0441238	0.0165076	0.0100545	0.0117199	0.00543107	0.018008	0.012544	0.0122888	0.00493359	0.00665895	0.0121715	0.0240158	0.0083843	0.0112423	0.0104437	0.00380836	0.0327175	0.0227657	0.0127752	0.0174555	0.0197511	0.0281588	0.020951	0.014595	0.0266976	0.0569459	0.0304942	0.0808019	0.0571277	0.0511037	0.0604141	0.0500496	0.0669625	0.0131205	0.0240296	0.033606	0.0237195	0.0242901	0.0158273	0.00738785	0.0227548	0	0	0.00334634	0	0	0	0.000807364
Nyap2	0	0	0	0	0	0	0	0	0	0	0	0	0.00254152	0	0	0	0	0	0	0	0	0	0	0	0	0	0	0	0	0	0	0	0	0	0	0	0	0	0	0	0	0	0	0	0	0	0	0	0
Irs1	0.358986	0.275255	0.317558	0.321125	0.246347	0.368563	0.37502	0.344247	0.3946	0.428246	0.37825	0.310285	0.257112	0.385308	0.406627	0.510669	0.334373	0.375256	0.345621	0.367562	0.295054	0.208911	0.131339	0.221927	0.326009	0.321368	0.212348	0.299598	0.256565	0.315804	0.658245	0.34163	0.262597	0.324551	0.369077	0.351563	0.289564	0.278612	0.299853	0.48401	0.472046	0.372813	0.201797	0.296166	0.353262	0.264063	0.181128	0.262284	0.291052
Gm9747	0.00313984	0.014338	0.010613	0	0.00497919	0.00389829	0.00534098	0.0212757	0.00300317	0.00217925	0.00468822	0.00838936	0.00201312	0.00475737	0.00437998	0.00899748	0.024694	0	0.0123919	0.00279054	0	0.00191657	0.00673532	0.00173783	0	0.00542616	0.00295119	0	0	0	0.00914358	0.0240842	0.0143916	0.00826547	0.00270984	0.00242732	0.0269347	0.00337833	0.0145878	0.00250314	0	0.0106172	0.0300983	0.0133412	0.0160252	0	0.0191285	0.00669681	0.00445457
Rhbdd1	0.0412795	0.0385738	0.0259612	0.0373111	0.0313867	0.0594388	0.0137434	0.0337744	0.0526963	0.0718886	0.0302762	0.0361642	0.0305762	0.0510318	0.0361341	0.0484837	0.0217237	0.0265308	0.0354939	0.0595623	0.032527	0.0215908	0.0353841	0.0410128	0.0346138	0.0402864	0.0256267	0.0200013	0.0244063	0.056287	0.0633564	0.052027	0.0469291	0.020673	0.0381514	0.0269429	0.0279424	0.019917	0.0485927	0.0238477	0.0609105	0.0140206	0.0334532	0.0641979	0.0726443	0.0493061	0.0724993	0.0353072	0.0967165
Gm28940	0.0121671	0	0	0	0.00366597	0.0244705	0	0	0	0	0.0315479	0	0.00251541	0.0050813	0	0.0256771	0	0.00483006	0	0	0.0590352	0	0	0.0107498	0	0.0191466	0	0	0.00417084	0.0026776	0.0216626	0	0.00796016	0.00223765	0	0.00209248	0	0	0	0	0.0264383	0	0.00356735	0	0.00307138	0	0	0	0
Col4a4	5.1372	4.13399	3.99754	1.77428	1.73809	4.33036	4.43215	3.35029	2.65652	1.6862	4.65333	1.72537	1.10513	1.6388	0.871041	2.9761	2.04992	1.45112	1.12422	0.794108	6.27747	1.39839	1.94527	2.28496	1.87709	2.97736	2.13291	2.17326	1.47315	1.13167	4.84901	2.8381	2.84997	2.01728	1.02477	3.00832	1.6361	0.925445	0.822755	0.605649	4.1045	3.95351	3.85262	3.21348	2.33316	0.327647	0.275538	0.312985	0.136856
Col4a3	0.821859	0.524853	0.482572	0.309377	0.278696	0.703925	0.597576	0.466595	0.367062	0.232745	0.557196	0.137655	0.0691422	0.24759	0.0874157	0.369912	0.168729	0.148411	0.0961195	0.0703947	0.80618	0.0947013	0.199743	0.316815	0.231922	0.325577	0.228827	0.25201	0.240456	0.105155	0.4905	0.362331	0.384069	0.278054	0.171654	0.292733	0.156501	0.0307471	0.0707244	0.0568688	0.673062	0.663088	0.492735	0.48818	0.313724	0.0364627	0.0237318	0.0808084	0.0467415
Mff	1.02093	0.94842	0.825564	0.677918	0.852338	0.849819	0.716571	0.76831	0.651008	0.812356	0.819301	0.750023	0.854329	0.697038	0.812384	0.716112	0.609859	0.747737	0.558264	1.00215	0.685544	0.782593	0.85014	0.582146	0.711097	0.855576	0.796165	0.727751	0.67951	0.823787	1.2763	1.05189	0.995963	0.949572	0.933046	0.824639	0.763802	0.703752	0.895732	0.857379	0.936295	0.839372	0.761345	0.735573	0.790635	0.703926	0.746711	0.819091	0.632796
Tm4sf20	0	0	0	0	0	0	0.00198886	0	0	0	0	0	0	0.00294672	0	0	0	0	0	0	0	0	0.00269073	0.00236818	0	0	0	0	0	0	0	0	0.0059105	0	0	0	0	0	0	0	0	0	0	0	0	0	0	0	0
Gm47791	0	0	0	0	0	0	0	0	0	0	0	0	0	0	0	0	0	0	0	0	0	0	0	0	0	0	0	0	0	0	0	0	0	0	0	0	0	0	0	0	0	0	0	0	0	0	0	0	0
Gm28942	0	0	0	0	0	0	0	0	0	0	0	0	0	0	0	0	0	0	0	0	0	0	0	0	0	0	0	0	0	0	0	0	0	0	0	0	0	0	0	0	0	0	0	0	0	0	0	0	0
Agfg1	0.688782	0.608538	0.613225	0.404213	0.422964	0.501481	0.41482	0.4963	0.433298	0.477427	0.464126	0.483082	0.461693	0.392155	0.419035	0.494136	0.608663	0.422585	0.37045	0.474919	0.444672	0.4213	0.508018	0.392593	0.460112	0.584264	0.492908	0.435533	0.432463	0.440133	0.589998	0.522828	0.410323	0.536153	0.437807	0.541577	0.589461	0.465422	0.515136	0.416216	0.545001	0.458706	0.394728	0.379744	0.398953	0.414185	0.353586	0.412136	0.377736
A030005L19Rik	0.00454888	0.0122396	0	0	0	0.00857588	0	0.00581512	0.00679035	0.00192367	0.00330242	0	0	0	0.00404575	0.00382872	0	0	0	0.00856119	0.0062842	0	0	0	0.00302036	0.0031238	0.00565908	0	0	0.0046879	0	0.00904159	0	0.0124018	0.00227126	0.00830339	0	0	0	0	0.00332028	0	0.00414182	0.00367318	0	0	0	0	0.000718208
A030014E15Rik	0	0.00158253	0	0	0	0	0	0	0	0	0	0	0.00545452	0	0	0	0	0	0	0	0	0	0.00784088	0	0	0.00314913	0	0	0	0	0	0	0.00778991	0	0	0.00347723	0	0	0	0	0	0	0	0	0	0	0	0	0
Gm6217	0	0	0	0	0	0	0	0	0	0	0	0	0	0	0	0	0	0	0	0	0	0	0	0	0	0	0	0	0	0	0	0	0	0	0	0	0	0	0	0	0	0	0	0	0	0	0	0	0
A030003K21Rik	0	0	0	0	0	0	0	0	0	0	0	0	0	0	0	0	0	0	0	0	0	0	0	0	0	0	0	0	0	0	0	0	0	0	0	0	0	0	0	0	0	0	0	0	0	0	0	0	0
Gm7544	0	0	0	0	0	0	0	0	0	0	0	0	0	0	0	0	0	0	0	0	0	0	0	0	0	0	0	0	0	0	0	0	0	0	0	0	0	0	0	0	0	0	0	0	0	0	0	0	0
Gm47955	0	0	0	0	0	0	0	0	0	0	0	0	0	0	0	0	0	0	0	0	0	0	0	0	0	0	0	0	0	0	0	0	0	0	0	0	0	0	0	0	0	0	0	0	0	0	0	0	0
Gm47959	0	0	0	0	0	0	0	0	0	0	0	0	0	0	0	0	0	0	0	0	0	0	0	0	0	0	0	0	0	0	0	0	0	0	0	0	0	0	0	0	0	0	0	0	0	0	0	0	0
Slc19a3	0.00141446	0.00372722	0	0.0146264	0.00341987	0.01049	0.00201318	0	0.00225133	0	0.00121388	0	0	0	0.00125944	0	0.0141016	0	0.00598408	0.00640555	0.000861209	0.00209531	0	0	0	0.00267017	0	0	0	0.0046454	0	0	0	0.00651495	0.00194924	0.00384371	0	0.00624786	0.00812011	0	0.0040544	0	0	0.003183	0.00330521	0.00662664	0	0.00954307	0.00604215
Krtap28-10	0	0	0	0	0	0	0	0	0	0	0	0	0	0	0	0	0	0	0	0	0	0	0	0	0	0	0	0	0	0	0	0	0	0	0	0	0	0	0	0	0	0	0	0	0	0	0	0	0
Gm47969	0	0	0	0	0	0	0	0	0	0	0	0	0	0	0	0	0	0	0	0	0	0	0	0	0	0	0	0	0	0	0	0	0	0	0	0	0	0	0	0	0	0	0	0	0	0	0	0	0.000767192
A030005K14Rik	0	0	0	0	0	0	0	0	0	0	0	0	0	0	0	0	0	0	0	0	0	0	0	0	0	0	0	0	0	0	0	0	0	0	0	0	0	0	0	0	0	0	0	0	0	0	0	0	0
Krtap28-13	0.00482785	0	0	0	0	0	0	0.00558872	0.00104383	0	0	0	0	0	0	0	0	0	0	0	0	0	0	0.00181657	0.00164555	0	0	0	0	0	0	0	0	0	0	0	0	0	0	0	0	0	0	0	0	0	0	0	0
Ccl20	0	0	0	0	0	0	0	0	0	0	0	0	0	0	0	0	0	0	0	0	0	0	0	0	0	0	0	0	0	0	0	0	0	0	0	0	0	0	0	0	0	0	0	0	0	0	0	0	0
Daw1	0	0	0	0	0	0	0	0	0	0	0	0	0	0	0	0	0	0	0	0	0.00234504	0.00295725	0	0	0	0	0	0	0	0	0	0	0	0.00263619	0	0	0	0	0	0	0	0	0	0	0	0	0	0	0
Sphkap	0	0	0	0	0	0.00463376	0	0	0	0	0	0	0	0.00632111	0	0	0	0	0	0	0	0	0	0	0	0	0	0	0.00653134	0	0	0	0	0	0	0	0	0	0	0	0	0	0	0	0	0.163927	0.0938416	0.136757	0.0367434
4933436I20Rik	0	0	0	0	0	0	0	0	0	0	0	0	0	0	0.00115092	0	0	0	0	0	0	0	0	0	0	0	0	0	0	0	0	0	0	0	0.00252265	0	0	0	0	0	0	0	0	0	0	0	0	0	0
Pid1	1.33892	1.26454	1.48374	1.92226	1.64613	1.44832	1.32434	1.27296	1.06168	1.24535	1.30789	0.526855	0.797263	0.937177	0.725879	2.29641	1.77836	1.29071	1.61106	1.54949	0.925236	0.297514	0.358006	0.89757	0.809879	1.83779	1.361	1.73836	1.68041	1.70202	3.01908	2.47928	2.32435	2.61778	2.18964	1.40044	0.942256	1.40724	0.822318	1.19649	0.970672	0.798833	0.862898	0.954781	0.99739	0.174136	0.0692921	0.083508	0.0298633
Dner	0.0782542	0.0140905	0.0174334	0.0219332	0.00952789	0.0496564	0.0114575	0.00653741	0.00607674	0.004061	0.126576	0.0186021	0.0199225	0.0320873	0.00706234	0.157873	0.0302803	0.0148595	0.013484	0	0.11298	0.0140828	0.0115717	0.00909193	0.0119957	0.129282	0.0295581	0.0379982	0.00791331	0.0124749	0.0815636	0.0202626	0.0072489	0	0	0.0756086	0.0382167	0.0499458	0.021466	0.0062541	0.0203917	0	0.0038279	0	0.00132124	0	0	0	0
Trip12	0.674168	0.48311	0.673258	0.632748	0.523079	0.615947	0.479117	0.415243	0.588193	0.4714	0.582066	0.470937	0.572054	0.647377	0.571001	0.689839	0.304194	0.625005	0.633754	0.531003	0.661552	0.595253	0.653835	0.582652	0.677227	0.598977	0.564735	0.603861	0.650371	0.672043	0.702749	0.67425	0.615542	0.560917	0.504437	0.58417	0.434392	0.512302	0.704086	0.566893	0.562856	0.400681	0.421887	0.426464	0.434819	0.709438	0.525622	0.723648	0.890251
Fbxo36	0.0324885	0.0106433	0.0300419	0.0308671	0.0435534	0.0511315	0.00883414	0.0535174	0.0417349	0.0438896	0.0487846	0.0394016	0.0569472	0.0497717	0.0771039	0.0402754	0.023726	0.0272664	0.0350957	0.0392561	0.065938	0.036976	0.0718448	0.0383616	0.0644805	0.0270073	0.0190258	0.058838	0.0677977	0.0651138	0.0655212	0.0512571	0.0592908	0.0463587	0.0450832	0.0412214	0.0182946	0.0256287	0.055687	0.0538777	0.0182926	0.0225324	0.0249451	0.0283146	0.0377635	0.228378	0.056023	0.0884387	0.11735
Slc16a14	0	0	0	0	0	0	0	0	0	0	0	0	0	0	0	0	0	0	0	0	0	0	0	0	0.00147435	0	0	0	0	0	0	0	0	0	0	0	0	0	0	0	0	0	0	0	0	0	0	0	0
C130026I21Rik	0	0	0	0	0.00426329	0	0	0	0	0	0	0	0	0	0	0	0	0	0	0	0	0	0	0	0.00736963	0	0	0	0	0	0	0	0	0	0	0.00401097	0	0	0	0	0	0	0	0	0.00312074	0	0	0	0
A530032D15Rik	0	0	0	0	0	0	0	0	0	0.00356125	0	0	0	0	0	0	0	0	0	0	0	0	0	0	0.00418729	0	0.00385545	0	0	0	0	0	0	0	0	0	0	0.00565835	0	0	0	0	0	0	0	0	0	0	0.000731263
Gm10553	0	0	0	0	0	0	0	0	0	0	0	0	0	0	0	0	0	0	0	0	0	0	0	0	0	0	0	0	0	0	0	0	0	0	0	0	0	0	0	0	0	0	0	0	0	0	0	0	0
A530040E14Rik	0.00241464	0	0	0	0.00307873	0.00293858	0	0	0	0	0.00086396	0	0	0	0	0	0	0	0	0	0	0	0	0.00340846	0	0	0	0	0	0	0	0.0666778	0	0	0	0	0	0	0	0	0	0	0	0	0	0.0114382	0.00771234	0	0
Gm16028	0	0	0	0	0	0	0	0	0	0	0	0	0	0	0	0	0	0	0	0	0	0	0	0	0	0	0	0	0	0	0	0	0	0	0	0	0	0	0	0	0	0	0	0	0	0	0	0	0
Gm16025	0	0	0	0	0	0	0	0	0	0	0	0	0	0	0	0	0	0	0	0	0	0	0	0	0	0	0	0	0	0	0	0	0	0	0	0	0	0	0	0	0	0	0	0	0	0	0	0	0
Gm16092	0	0	0	0	0	0	0	0	0	0	0	0	0	0	0	0	0	0	0	0	0	0	0	0	0	0	0	0	0	0	0	0	0	0	0	0	0	0	0	0	0	0	0	0	0	0	0	0	0
G530012D18Rik	0	0	0	0	0.00443779	0	0	0	0.00347816	0	0	0	0	0.00211703	0	0	0	0	0	0	0	0	0	0	0	0	0	0	0	0	0	0	0	0	0	0	0	0	0	0	0	0	0	0	0	0	0	0	0
Sp110	0.00827692	0.00893403	0.0783587	0.0449586	0.0565526	0.00477992	0.00650258	0.0435512	0.0425485	0.0309035	0.00446919	0.00706389	0.0168365	0.0180026	0.0140109	0	0.00692275	0.0626104	0.0539914	0.0976791	0	0.00418587	0.0923135	0.0525557	0.0835882	0.00222071	0.0174642	0.0677766	0.0562344	0.046172	0	0.0330276	0.0481829	0.105274	0.0417196	0.0021531	0	0.0398779	0.0179895	0.0256535	0.0468857	0.054061	0.0288581	0.0748617	0.0666178	0	0	0.0262433	0.0011517
Gm16094	0	0	0	0	0	0	0	0	0	0	0	0	0	0	0	0	0	0	0	0	0	0	0	0	0	0	0	0	0	0	0	0	0	0	0	0	0	0	0	0	0	0	0	0	0	0	0	0	0
Sp140	0.00634952	0.00880715	0.00636871	0.026166	0.0102948	0.00189377	0.0146159	0.0036211	0.012019	0.00528213	0	0.00851531	0.0236387	0.0267857	0.0158466	0.00492606	0.0141449	0.0587232	0.0621178	0.0835808	0.0109702	0.0287126	0.0843369	0.0733622	0.0863951	0.0144708	0.0221834	0.0296896	0.0684129	0.0331007	0.00564625	0.0201891	0.0470337	0.0329315	0.0236913	0.00782429	0.01154	0.0132753	0.061518	0	0.0140978	0.0327394	0.0115399	0.0154609	0.0144109	0	0	0.00544763	0.00745266
Gm10552	0	0	0	0	0	0	0	0	0	0	0	0	0	0	0	0	0	0	0	0	0	0	0	0	0	0	0	0	0	0	0	0	0	0	0	0	0	0	0	0	0	0	0	0	0	0	0	0	0
Gm17017	0	0	0	0	0	0	0	0	0	0	0	0	0.00258358	0	0	0	0	0	0	0	0	0	0	0	0.00200147	0	0	0	0	0	0	0	0	0	0.00240234	0	0	0	0	0	0	0	0	0	0	0	0	0	0
Sp100	0.0200752	0.0255596	0.156473	0.0863266	0.164388	0.00319208	0.0106891	0.0860352	0.110291	0.110547	0.0097725	0.0214872	0.112403	0.10906	0.128059	0.00926175	0.0149976	0.225441	0.369255	0.257387	0.0115869	0.0111474	0.25807	0.497513	0.4363	0.00468651	0	0.121381	0.186115	0.139013	0.0363002	0.0443303	0.150181	0.233065	0.198312	0.00927893	0.0133062	0.0936485	0.183708	0.120106	0	0.0397899	0.0576141	0.0673155	0.0775176	0	0.0220533	0.0199953	0.0467075
A630001G21Rik	0.00513121	0	0.00997765	0.0180862	0	0.0089302	0	0.00540836	0.00334891	0.00258175	0.00548283	0	0	0	0	0	0	0.013796	0	0.00939804	0	0.00746505	0	0.00746384	0.00281493	0	0	0.0130061	0	0	0.00517941	0	0	0.00790017	0.00144077	0.0022102	0	0	0	0	0	0	0.0034528	0.00536238	0.00300785	0	0	0	0
9930111H07Rik	0	0	0	0	0	0	0	0	0	0	0	0	0	0	0	0	0	0	0	0	0	0	0	0	0	0	0	0	0	0	0	0	0	0	0	0.0027018	0	0	0	0	0	0	0	0	0	0	0	0	0
Cab39	0.40954	0.342366	0.256571	0.322688	0.380115	0.532862	0.363846	0.352724	0.446911	0.566599	0.389491	0.275604	0.275511	0.322225	0.430189	0.426072	0.306916	0.299053	0.352573	0.370939	0.426365	0.297525	0.271373	0.387924	0.439349	0.518388	0.321683	0.284755	0.337126	0.404652	0.504306	0.319222	0.323407	0.405389	0.438244	0.522451	0.319729	0.283459	0.373715	0.433119	0.780459	0.321706	0.490614	0.599336	0.661203	0.364807	0.317608	0.345397	0.411699
Itm2c	2.70356	1.85266	1.97748	1.90145	2.95748	1.45773	0.981176	1.13754	1.22451	1.66263	1.93693	1.37784	1.48049	1.61293	2.14875	1.93948	1.33937	1.45313	1.67843	2.36347	2.18178	1.85423	2.09203	2.30365	3.05957	2.16955	1.44878	1.82509	2.30642	2.19328	1.91537	1.4125	1.82555	2.1331	2.65434	1.95265	1.26185	1.39546	1.47568	1.79713	1.19235	0.849329	0.914768	1.25348	1.32731	2.37055	1.39994	1.23119	1.82385
4933407L21Rik	0	0	0	0	0	0.00218915	0.00261296	0	0.00308513	0.00172884	0.00218997	0.00144792	0	0.00255271	0.00184384	0.00349557	0	0	0	0	0.00323649	0.00190518	0.00231161	0.00197301	0.00299763	0	0	0	0	0	0	0	0	0	0.00308954	0.00272059	0	0	0.00610674	0.0047857	0	0	0	0.00174943	0	0	0	0	0
Gm28884	0	0	0	0	0	0	0	0	0	0	0	0	0	0	0.000858704	0	0	0	0	0.00111281	0	0.00434063	0	0.00221225	0	0.00176988	0	0	0	0	0	0	0	0	0	0	0	0	0	0	0	0	0	0	0	0	0	0	0
Gpr55	0.00716025	0	0.00240682	0	0	0	0.00261296	0	0	0	0	0	0	0.00304303	0	0	0	0	0	0	0.00294642	0.00145912	0	0	0.00275764	0.00202423	0.00360798	0	0	0	0	0.0119757	0	0.00375533	0	0	0	0	0	0	0	0	0	0	0	0	0	0	0.00307251
Gm28100	0	0	0	0	0	0	0	0	0	0	0	0	0	0	0	0	0	0	0	0	0	0	0	0	0	0	0	0	0	0	0	0	0	0	0	0	0	0	0	0	0	0	0	0	0	0	0	0	0
Spata3	0	0	0	0	0	0	0	0	0	0	0	0	0	0	0	0	0	0	0	0	0	0	0	0	0	0	0	0	0	0	0	0	0	0	0	0	0	0	0	0	0	0	0	0	0	0	0	0	0
2810459M11Rik	0	0	0	0	0	0	0	0	0	0	0.00167643	0	0	0	0	0.00289372	0	0	0	0	0.00234504	0	0	0	0	0	0	0	0	0	0	0	0	0	0	0	0	0	0	0	0	0	0	0	0	0	0	0	0
Psmd1	0.937484	0.852521	0.917584	0.849236	0.820721	0.921785	0.781499	0.797431	0.724333	0.816702	0.934297	0.952438	0.852558	0.81478	0.828272	0.81853	0.812602	0.78834	0.606692	0.709108	0.94777	1.08933	0.995649	0.801334	0.863345	0.987049	1.07936	0.876046	0.822739	1.00524	1.09798	0.781865	0.769719	0.654922	0.820627	0.847549	0.909624	0.785412	0.646845	0.794537	1.13631	0.982164	0.909855	0.932512	0.85306	1.24768	1.11317	0.873502	1.05771
Htr2b	0.0134465	0.00771483	0.0137125	0.0167449	0.00810093	0.0128574	0.00463117	0.00646498	0.00969327	0.00267528	0.00916676	0.0136604	0.0117535	0.02154	0.00226039	0.0113717	0.00854718	0.00390542	0	0	0.0125033	0.00182197	0.00648381	0.0183347	0.000796536	0.0224851	0.00180502	0.0177419	0	0.00286672	0.0355212	0	0	0.00615424	0.00745688	0.0160621	0.0049285	0.0150291	0.00435347	0.017371	0.0173547	0.0213991	0.00590807	0.00376244	0.00509333	0	0	0.0041463	0
Gm21972	0	0	0.00841145	0	0	0	0	0.00212859	0	0	0	0	0	0	0	0	0	0	0	0	0.0047028	0	0	0.00253911	0	0	0	0	0	0	0	0	0	0	0	0	0	0	0	0	0	0	0.00699399	0	0	0	0	0.0042095	0.000976146
Armc9	0.0950983	0.155235	0.13759	0.0905239	0.0556599	0.0838757	0.0478086	0.0995375	0.0823718	0.0548009	0.0827825	0.0881715	0.0911598	0.120458	0.0798033	0.0733519	0.0563397	0.0797496	0.111701	0.0835034	0.0777553	0.090556	0.126003	0.182379	0.091477	0.0938016	0.0729804	0.0777858	0.0748197	0.0749638	0.177346	0.110388	0.0328451	0.0881529	0.112436	0.0587575	0.112605	0.0848548	0.0413016	0.116805	0.0891931	0.072072	0.0734003	0.112048	0.0893208	0.0373393	0.0410497	0.0501015	0.0477182
Gm16341	0	0	0	0	0	0	0	0	0	0	0	0	0	0	0	0	0	0	0	0	0	0	0	0	0	0	0	0	0	0	0	0	0	0	0	0	0	0	0	0	0	0	0	0	0	0	0	0	0
B3gnt7	0.0124929	0.0111204	0	0	0.00152164	0.00574867	0.0040982	0.00627163	0	0.00209536	0.0120153	0	0	0.00214298	0.0071805	0	0.0131427	0.00532092	0	0	0.00325693	0.00143219	0.00706985	0	0.00530872	0.00283388	0	0	0	0.00231243	0	0	0.00304848	0	0	0.00473374	0	0	0	0	0.00586134	0	0	0	0	0	0	0.00356247	0.00195218
Gm28626	0	0	0	0	0	0	0	0	0	0	0	0	0	0	0	0	0	0	0	0	0	0	0	0	0	0	0	0	0	0	0	0	0	0	0	0	0	0	0	0	0	0	0	0	0	0	0	0	0
Ncl	7.54307	9.18423	6.32242	5.99267	5.28977	6.78867	8.09847	5.76088	5.98808	4.76132	8.89082	9.71646	7.83878	8.15962	6.7135	6.57705	6.71626	5.42364	5.99192	4.54306	8.01761	9.64908	7.021	6.95291	5.89154	7.05453	7.67748	5.18446	5.45584	4.88667	6.47407	5.90879	4.63599	5.03978	4.91896	8.19959	10.0578	6.72471	6.36536	5.99659	6.27632	7.61977	5.14105	5.00321	4.52877	7.54021	8.89578	7.53053	6.036
Nmur1	0	0	0	0	0	0	0	0	0	0	0	0	0	0	0	0	0	0	0	0	0	0	0	0	0	0	0	0	0	0	0	0	0	0	0	0	0	0	0	0	0	0	0	0.00228332	0	0	0	0	0
Tex44	0	0	0	0	0	0	0	0	0	0	0	0	0	0	0	0	0	0	0	0	0	0	0	0	0	0	0	0	0	0	0	0	0	0	0	0	0	0	0	0	0	0	0	0	0	0	0	0	0
Ptma	41.4609	44.3783	29.7646	41.1224	30.8005	31.9311	37.8805	30.7261	37.1693	29.5237	31.0275	31.3712	24.9388	26.8119	24.0007	29.5683	34.2137	23.2357	30.6903	29.3075	28.7845	28.7813	21.4147	24.0572	22.2537	33.747	32.7898	23.7822	30.0347	24.1358	25.8841	21.9745	17.6084	20.3773	21.0616	33.4791	42.5496	27.4293	33.7605	27.2822	28.9156	28.0283	21.099	24.2684	22.424	21.7869	18.3388	15.4866	14.7148
Pde6d	0.30389	0.146122	0.237535	0.290976	0.31738	0.255204	0.146598	0.187737	0.269545	0.38396	0.278609	0.130303	0.204938	0.228803	0.334811	0.289228	0.189261	0.170462	0.30413	0.387354	0.222822	0.180419	0.142736	0.248231	0.284147	0.303967	0.187528	0.165098	0.273024	0.400391	0.296563	0.307635	0.217379	0.344413	0.425945	0.257422	0.0795475	0.149707	0.20919	0.366027	0.369603	0.150727	0.249386	0.355065	0.429888	0.277205	0.120484	0.135652	0.197034
Cops7b	0.129522	0.107468	0.0992791	0.102864	0.114211	0.123569	0.120187	0.0902035	0.0982601	0.0981699	0.119895	0.0780558	0.0911096	0.102571	0.116285	0.143836	0.0872233	0.0897904	0.098567	0.0646151	0.103636	0.063119	0.0567567	0.0919928	0.102982	0.107614	0.104234	0.121422	0.0664794	0.0939032	0.20273	0.154767	0.190535	0.0966529	0.118164	0.0795862	0.0546806	0.0508427	0.100858	0.113256	0.0876782	0.0724112	0.0605197	0.108684	0.0573059	0.0485156	0.0499954	0.073158	0.0637124
Nppc	0.0300845	0.0334115	0.016948	0.0593496	0.0274812	0.0163835	0.00825433	0.0294732	0.024854	0.0201052	0.0114633	0.00723169	0.00450383	0.0081886	0.012476	0.00306455	0.0108609	0.0197116	0.0151638	0.0287275	0	0.0152403	0.0310876	0.0447221	0.0242893	0.03845	0.027765	0	0	0.0137693	0.0327046	0.0194184	0.0206142	0.00383591	0.0266624	0.0213075	0.0403391	0.0180722	0.0102423	0.0482955	0.0196026	0	0.0187314	0.0223666	0.0269438	0.42015	0.0198626	0.0049682	0.0757479
Dis3l2	0.132817	0.130987	0.0698086	0.122279	0.116656	0.138442	0.0967315	0.0834575	0.105546	0.0943828	0.154341	0.0919213	0.0923679	0.103637	0.135423	0.152266	0.244269	0.122981	0.0951546	0.130847	0.172322	0.0977535	0.146886	0.110418	0.12657	0.100311	0.0883492	0.0893548	0.0972259	0.0942028	0.175989	0.141863	0.176926	0.114822	0.0995519	0.156571	0.143372	0.159607	0.0757372	0.0862368	0.100123	0.0814797	0.0933555	0.0740762	0.0765748	0.159177	0.156371	0.214597	0.172129
Gm28375	0	0	0	0	0	0	0	0	0	0	0	0	0	0	0	0	0.00414631	0	0.0087509	0	0	0	0	0	0	0	0	0	0	0	0	0	0	0	0	0	0	0	0	0	0	0	0	0	0	0	0	0	0
Gm29371	0	0	0.00396217	0	0	0	0	0.00191953	0	0	0	0	0	0.00369058	0	0	0.00658626	0.00556796	0.00444085	0.00162601	0	0	0.00184538	0	0	0	0	0	0	0.00129838	0	0	0	0	0.00136813	0	0	0	0	0	0	0.00330296	0	0	0	0	0	0	0
Alppl2	0	0.00092321	0	0	0	0	0	0	0	0	0	0	0	0	0	0	0	0	0	0	0	0	0	0	0	0	0	0	0	0	0	0	0	0	0	0	0	0	0	0	0	0	0	0	0	0	0	0	0
Alpi	0	0	0	0	0	0	0	0	0	0	0	0	0	0	0	0	0	0	0	0	0	0	0	0	0	0	0	0	0	0	0	0	0	0	0	0	0	0	0	0	0	0	0	0	0	0.00525315	0	0	0
Akp3	0	0	0	0	0	0	0	0	0	0	0	0	0	0	0	0	0	0	0	0	0	0	0	0	0	0	0	0	0	0	0	0	0	0	0	0	0	0	0	0	0	0	0	0	0	0	0	0	0
Gm29374	0	0	0	0	0	0	0	0	0	0	0	0	0	0	0	0	0	0	0	0	0	0	0	0	0	0	0	0	0	0	0	0	0	0	0	0	0	0	0	0	0	0	0	0	0	0	0	0	0
Ecel1	0	0	0	0	0	0	0	0	0	0	0.000956346	0.00126927	0.00558828	0	0.00135339	0	0	0	0	0	0.00232434	0	0	0	0	0	0	0	0	0.00309665	0	0	0	0	0.00495995	0	0	0	0	0	0	0	0	0	0	0	0	0	0
Prss56	0	0	0	0	0	0	0	0	0	0	0	0	0	0	0	0	0	0	0	0.00377976	0	0	0	0	0	0	0	0	0	0	0	0	0	0	0	0	0	0	0	0	0	0	0	0	0	0	0	0.00993513	0.00193633
Chrnd	0	0	0	0	0	0	0	0	0	0	0	0	0	0	0	0	0	0	0	0	0	0	0	0	0	0	0	0	0	0	0	0	0	0	0	0	0	0	0	0	0	0	0	0	0	0	0	0	0
Chrng	0	0.00303582	0	0	0	0	0	0	0	0	0	0	0	0.00190738	0	0	0	0	0	0	0	0.00209531	0.00269843	0	0.00165833	0	0	0	0	0	0	0	0	0	0	0	0	0	0	0	0	0	0	0	0	0	0	0	0
Eif4e2	0.718899	0.80242	0.724024	0.426468	0.713011	0.781219	0.752235	0.777704	0.568229	0.66322	0.917044	1.09869	1.06438	1.07072	0.978079	0.717944	0.831321	0.738844	0.763745	0.682456	0.930701	1.30946	1.16568	0.930991	1.16324	0.819156	0.904244	0.936288	0.718439	0.815181	0.764201	0.815473	0.685673	0.786029	0.767006	0.676721	0.932454	0.912998	0.782317	0.769422	0.707707	0.814722	0.865632	0.594699	0.650658	0.954358	1.11988	1.05656	0.990363
Efhd1	0.00397689	0	0	0.00854954	0.00335796	0	0.0163737	0	0.00295192	0.00496096	0.00349221	0.0124919	0.00282706	0.0027137	0.00178488	0.00349557	0	0	0.00809188	0	0.00502457	0.00394828	0.00628488	0.00291782	0	0.00261085	0.0028829	0.0132001	0	0.00611963	0	0	0	0.00643153	0.00851877	0	0.00501035	0.00862839	0.013981	0	0.00337526	0	0	0	0.00374144	0.381072	0.153765	0.185768	1.10845
Efhd1os	0	0	0	0	0	0	0	0	0	0	0	0	0	0	0	0	0	0	0	0	0	0	0	0	0	0	0	0	0	0	0	0	0	0	0	0	0	0	0	0	0	0	0	0	0	0	0	0	0
Gigyf2	0.606266	0.647591	0.599914	0.685615	0.6904	0.574473	0.555576	0.618294	0.574786	0.556825	0.672194	0.563686	0.725444	0.632214	0.714432	0.675854	0.537446	0.733332	0.622931	0.655259	0.656526	0.622284	0.727932	0.602907	0.710066	0.577226	0.523416	0.520087	0.554288	0.614696	0.677338	0.79454	0.649424	0.666334	0.556165	0.666226	0.589297	0.657332	0.569164	0.611957	0.573354	0.52353	0.527652	0.436511	0.532675	0.688702	0.7425	0.645482	0.6344
Kcnj13	0	0.00307321	0.00449012	0	0.0137186	0	0.00666456	0	0.0096979	0.00262845	0.0014092	0.00747437	0.00919091	0.00912721	0.00266585	0.00606897	0.00516458	0.014443	0.0288858	0.0226368	0	0.00139857	0.0022497	0	0.00150045	0	0.0104461	0	0	0.00618248	0	0.0309101	0.0170961	0.00800051	0.0127285	0	0.00545242	0.0149722	0.00734984	0.00456279	0	0.00566711	0	0	0.00430484	0	0	0	0.00687535
3110079O15Rik	0	0	0	0	0	0	0	0	0	0	0	0.00124339	0	0	0	0	0	0	0	0	0	0.00313355	0	0	0.00214633	0	0	0	0	0.00326708	0	0	0	0	0	0	0	0	0	0	0.00660802	0.0275769	0.00620105	0.0364655	0.00117686	0	0	0	0
Ngef	0.00439162	0	0.00964364	0.00503822	0.0134877	0.00308896	0.00324641	0.017993	0.00149514	0.00823712	0.00220965	0.00755596	0.00786908	0	0	0.00548398	0	0.0110842	0	0.00372525	0.0233693	0.0409462	0.126114	0.0690814	0.0726172	0.0178182	0.00503754	0.017237	0	0.00562196	0.0218003	0	0	0	0.012303	0.00298844	0	0	0.00511754	0	0.0378486	0.0124039	0.0605756	0.0325337	0.0134364	0.0978167	0.108406	0.0624115	0.346191
Neu2	0	0	0	0	0	0	0	0	0	0	0	0	0	0	0	0	0	0	0	0	0	0	0	0	0	0	0	0	0	0	0	0	0	0	0	0	0	0	0	0	0	0	0	0	0	0	0	0	0
Inpp5d	0.00228946	0	0	0	0	0	0	0	0	0	0	0	0	0	0	0	0	0	0	0	0.00188223	0	0	0	0	0	0	0	0	0	0.0103774	0	0.0144877	0	0	0	0	0	0.00556674	0	0	0	0	0	0	0	0	0	0.0108516
Atg16l1	0.158661	0.173851	0.182191	0.139268	0.192871	0.166149	0.134858	0.0976326	0.106243	0.164331	0.170382	0.10557	0.163195	0.132886	0.125963	0.11032	0.237015	0.182472	0.132122	0.159041	0.160117	0.137107	0.186317	0.226794	0.199494	0.15875	0.0916332	0.135391	0.10808	0.145622	0.16519	0.166358	0.131514	0.200766	0.186682	0.151309	0.112019	0.152711	0.156454	0.204205	0.14081	0.07482	0.127727	0.110438	0.149659	0.160801	0.201929	0.196798	0.201045
Sag	0.0504029	0.041606	0.085537	0.0416039	0.024205	0.0507335	0.0744818	0.0441201	0.0250247	0.026401	0.0523995	0.0567721	0.0635825	0.0554255	0.0233643	0.0600657	0.0168466	0.030112	0.0196055	0.0305731	0.0448417	0.0596461	0.127559	0.133883	0.0602647	0.0574007	0.0396736	0.0177899	0.0382403	0.0459598	0.0758677	0.0149699	0.0195728	0.0147463	0.0218238	0.0512761	0.0331356	0.0562365	0.0447779	0.0258073	0.0528123	0.0173096	0.00441112	0.0344622	0.0441742	0.0418156	0.0108947	0.0304982	0.0267218
Dgkd	0.173983	0.243496	0.183921	0.127834	0.147957	0.192142	0.207505	0.142582	0.118676	0.125099	0.175906	0.217978	0.202525	0.16076	0.165897	0.197767	0.186935	0.214766	0.235044	0.178615	0.209307	0.19862	0.196874	0.165242	0.176952	0.173096	0.174249	0.145618	0.184728	0.15978	0.177874	0.173156	0.121952	0.18931	0.182962	0.196762	0.226263	0.182518	0.192205	0.226204	0.209013	0.21252	0.109923	0.12899	0.153093	0.173457	0.181402	0.195332	0.144795
Gm19582	0	0	0	0	0	0	0	0	0	0	0	0	0	0	0	0	0	0	0	0	0	0	0	0	0	0	0	0	0	0	0	0	0	0	0	0	0	0	0	0	0	0	0	0	0	0	0	0	0.00116396
Usp40	0.291424	0.239622	0.267411	0.249305	0.290792	0.238078	0.172375	0.269126	0.214873	0.254717	0.352997	0.221211	0.28774	0.322312	0.313422	0.31369	0.334562	0.214433	0.225032	0.222761	0.272258	0.263653	0.302494	0.246542	0.26474	0.29125	0.161594	0.224611	0.299674	0.21389	0.430879	0.272412	0.398088	0.271812	0.375953	0.327742	0.241596	0.293793	0.266596	0.223358	0.218786	0.25636	0.143125	0.11829	0.229697	0.212168	0.349699	0.315894	0.218729
Ugt1a10	0	0	0	0	0	0	0	0	0	0	0	0	0	0	0	0	0	0	0	0	0	0	0	0	0	0	0	0	0	0	0	0	0	0	0	0	0	0	0	0	0	0	0	0	0	0	0	0	0
Ugt1a9	0	0	0	0	0	0	0	0	0	0	0	0	0	0	0	0	0	0	0	0	0	0	0	0	0	0	0	0	0	0	0	0	0	0	0	0	0	0	0	0	0	0	0	0	0	0	0	0	0
Ugt1a8	0	0	0	0	0	0	0	0	0	0	0	0	0	0	0	0	0	0	0	0	0	0	0	0	0	0	0	0	0	0	0	0	0	0	0	0	0	0	0	0	0	0	0	0	0	0	0	0	0
Ugt1a7c	0.0128595	0.00601477	0.0181534	0	0	0.0100486	0	0	0	0.00116006	0.0174944	0.00178291	0	0.00284965	0.00300566	0.0408381	0.00699302	0.0304721	0.00551815	0	0.0248934	0	0.00205173	0.00587142	0.00204515	0.0238904	0.0125714	0	0.00490513	0	0.00483888	0.00759474	0.0139971	0	0	0.00432923	0.00723592	0	0	0	0.0148885	0	0	0	0	0	0	0	0
Ugt1a6b	0	0	0	0	0	0	0	0	0	0	0	0	0	0	0	0	0	0	0	0	0	0	0	0	0	0	0	0	0	0	0	0	0	0	0	0	0	0	0	0	0	0	0	0	0	0	0	0	0
Ugt1a6a	0.0054658	0	0	0.00581758	0.00340007	0.00400223	0	0	0.00746861	0	0.00701466	0.00251757	0	0.0086949	0.00191136	0.0138825	0	0	0.00879013	0.00222111	0.0181792	0	0	0.00467	0	0.00610102	0	0	0	0	0.046571	0	0	0.00710139	0	0.0037667	0	0	0.00968345	0.00397122	0.00255567	0	0	0	0	0	0	0	0
Ugt1a5	0	0	0	0	0	0	0	0	0.00384216	0	0	0	0	0	0	0.00266346	0	0	0	0	0.00451051	0	0	0	0	0	0	0	0	0	0	0	0	0.00750001	0	0	0	0	0.00511754	0	0	0	0	0	0	0	0	0	0
Ugt1a2	0	0	0	0	0	0	0	0	0	0	0.00144894	0	0	0	0	0	0	0	0	0	0	0	0	0	0	0	0	0	0	0	0	0	0	0	0	0	0	0	0	0	0	0	0	0	0	0	0	0	0
Dnajb3	0.0213945	0.0206547	0.00952378	0.00584346	0.0202815	0.0326396	0.0158307	0.0152588	0.015452	0.0220936	0.0327088	0.0319009	0.0117758	0.0228833	0.0206721	0.0179663	0	0.0101846	0.024608	0.0167935	0.0241702	0.026022	0.0270793	0.0330612	0.023623	0.0404474	0.0463571	0.0131461	0.0170261	0.0386275	0.015881	0	0.0285285	0.030995	0.024374	0.0077059	0.0126581	0.0234717	0.00933149	0.0332656	0.0430708	0.0119761	0.0297003	0.013718	0.0263349	0.0184107	0.0128083	0	0.0160205
Ugt1a1	0	0	0	0	0	0	0	0	0	0	0	0	0	0	0	0	0	0	0	0	0.00195153	0	0	0	0	0	0	0	0	0	0	0	0	0	0	0	0	0	0	0	0	0	0	0	0	0	0	0	0
Mroh2a	0.00224603	0.00593948	0.00782125	0	0.00171479	0	0.00942154	0	0	0.00529667	0.00536657	0.0036517	0.00185863	0.00332845	0.00202741	0	0.00509404	0.0137071	0.0068214	0	0	0.00227717	0.0103692	0.00368559	0.00446121	0.00122716	0.00757083	0	0.010378	0.0042676	0	0	0.00846471	0	0.00648992	0	0.00843182	0.00355544	0	0.00572981	0.0120227	0.0194291	0	0.00216894	0.00264583	0	0	0.00608121	0.00233919
Hjurp	0.355508	0.632623	0.630329	0.558995	0.69664	0.440083	0.665718	0.77926	0.700133	0.704677	0.316417	0.473282	0.495936	0.321544	0.413801	0.310945	0.664723	0.60747	0.659086	0.720653	0.295243	0.54992	0.590709	0.488467	0.632666	0.343783	0.599455	0.471051	0.450034	0.506005	0.580131	0.777216	0.868339	0.728133	0.627089	0.350632	0.611703	0.68132	0.519451	0.549215	0.698658	0.770447	1.05817	1.07391	0.834188	0.148518	0.560298	0.595323	0.391462
Trpm8	0	0	0	0	0	0	0	0	0	0	0	0	0	0	0	0	0	0	0	0	0	0	0	0	0	0	0	0	0	0	0	0	0	0	0	0	0	0	0	0	0	0	0	0	0	0	0	0	0
4930453O03Rik	0	0	0	0	0	0	0	0	0	0	0	0	0	0	0	0	0	0	0	0	0	0	0	0	0	0	0	0	0	0	0	0	0	0	0	0	0	0	0	0	0	0	0	0	0	0	0	0	0
Spp2	0	0	0	0	0	0	0	0	0	0	0	0	0	0	0	0	0	0	0	0	0	0	0	0	0	0	0	0	0	0	0	0	0	0	0	0	0	0	0	0	0	0	0	0	0	0	0	0	0
Gm29538	0	0	0	0	0	0	0	0	0	0	0	0	0	0	0	0	0	0	0	0	0	0	0	0	0	0	0	0	0	0	0	0	0	0	0	0	0	0	0	0	0	0	0	0	0	0	0	0	0
Gm28888	0	0	0	0	0	0	0	0	0	0	0	0	0	0	0	0	0	0	0	0	0	0	0	0	0	0	0	0	0	0	0	0	0	0	0	0	0	0	0	0	0	0	0	0	0	0	0	0	0
Glrp1	0	0	0	0	0	0	0	0	0	0	0	0	0.00336568	0.00188943	0	0.00336324	0	0	0	0	0	0	0	0	0	0	0	0	0	0	0	0	0	0	0	0	0	0	0	0	0	0	0	0	0	0	0	0	0
Gm19589	0	0.00341295	0	0	0	0	0	0	0	0	0	0	0	0	0.00173003	0	0.008832	0	0	0	0	0	0	0	0	0	0	0	0	0	0	0	0	0	0	0	0	0	0.00512175	0	0	0	0	0	0	0	0	0	0.00101001
Gm29336	0	0	0	0	0	0	0	0	0	0	0	0.00216995	0	0	0	0	0	0	0	0	0	0	0.00130146	0.00247282	0	0	0	0	0.00169858	0	0	0	0	0	0	0.00272059	0	0	0	0	0	0	0	0	0	0	0	0	0
Arl4c	0.380164	0.410091	0.24565	0.365099	0.158353	0.185381	0.10943	0.107634	0.0773906	0.0601587	0.183471	0.220677	0.248557	0.340293	0.156241	0.252667	0.290684	0.188536	0.251338	0.160546	0.169606	0.138203	0.0549769	0.105339	0.107195	0.644822	0.466396	0.294742	0.51368	0.354636	0.180607	0.16406	0.14659	0.28491	0.1448	0.440254	0.310539	0.35389	0.407214	0.161575	0.0817067	0.137505	0.0424787	0.0916188	0.0254049	0.0431291	0.035147	0.0471601	0.0606552
Platr5	0	0	0	0	0	0	0	0	0	0	0	0	0.00290333	0	0.00150366	0	0	0	0	0	0	0	0	0.00307682	0	0	0	0	0	0	0	0	0	0	0.00168393	0	0	0	0	0	0	0	0	0	0	0	0	0	0
Gm29337	0	0	0	0	0	0	0	0	0	0	0	0	0	0	0	0	0	0	0	0	0	0	0	0	0	0	0	0	0	0	0	0	0	0	0	0	0	0	0	0	0	0	0	0	0	0	0	0	0
1700067G17Rik	0	0	0	0	0	0	0	0	0	0	0	0	0	0	0	0	0	0	0	0	0	0	0	0	0	0	0	0	0	0	0	0	0	0	0	0	0	0	0	0	0	0	0	0	0	0	0	0	0
Sh3bp4	0.176284	0.216427	0.230092	0.230243	0.310947	0.13651	0.140453	0.164013	0.158403	0.175542	0.117784	0.105101	0.120612	0.190625	0.15741	0.0998603	0.069694	0.18378	0.0982111	0.145605	0.0800352	0.122567	0.17198	0.236855	0.226401	0.0864422	0.140797	0.188685	0.160664	0.185539	0.0702031	0.0723426	0.207301	0.142907	0.202579	0.148999	0.153859	0.151162	0.126127	0.180469	0.111042	0.104995	0.147144	0.160577	0.110062	0.0351117	0.0156858	0.0521429	0.0283013
Gm28342	0	0	0	0	0	0	0	0	0	0	0	0	0	0	0	0	0	0	0	0	0	0	0	0	0	0	0	0	0	0	0	0	0	0	0	0	0	0	0	0	0	0	0	0	0	0.00904617	0	0	0.00505251
C030007H22Rik	0	0	0	0	0	0	0	0	0	0	0.00106683	0	0	0	0	0	0	0	0	0	0	0	0	0	0	0	0	0	0	0	0	0	0	0	0	0	0	0	0	0	0	0	0	0	0	0	0	0	0
Agap1	0.390371	0.398624	0.377972	0.251949	0.208562	0.423083	0.476653	0.519571	0.436997	0.424166	0.394114	0.545528	0.539149	0.439139	0.408202	0.350061	0.433626	0.721879	0.506828	0.454727	0.530998	0.697866	0.822832	0.731628	0.649163	0.354957	0.24241	0.432129	0.251864	0.223318	0.463487	0.41032	0.622962	0.445843	0.289399	0.405497	0.531191	0.55841	0.553321	0.324922	0.305377	0.386008	0.323494	0.285366	0.306653	0.284069	0.215401	0.432168	0.253137
Gbx2	0	0	0	0	0	0	0	0	0	0	0	0.00132247	0	0	0	0	0	0	0	0	0	0.00181064	0	0	0	0.0020856	0	0	0	0	0	0	0	0	0	0	0	0	0	0	0	0	0	0	0	0	0	0	0
Asb18	0	0	0	0	0	0	0	0	0.0111202	0	0	0	0.00237356	0	0	0	0	0	0	0	0	0.00329829	0.00191793	0.00213419	0.00181686	0	0	0	0	0	0	0	0	0	0	0	0	0	0	0	0	0	0	0	0	0	0	0	0
Iqca	0	0	0	0	0	0	0	0	0	0	0	0.00193236	0	0	0	0	0	0	0	0	0	0	0	0	0	0	0	0	0	0	0	0	0	0	0	0	0	0	0	0	0	0	0	0	0	0	0	0	0
4930434B07Rik	0	0	0	0	0	0	0	0	0	0	0	0	0	0	0	0	0	0	0	0	0	0	0	0	0	0	0	0	0	0	0	0	0	0	0	0	0	0	0	0	0	0	0	0	0	0	0	0	0
Ackr3	0.0247257	0.0206827	0.0246159	0.0113547	0.00669483	0.0287493	0.0621049	0.0363491	0.0340041	0.0233684	0.0228976	0.0626257	0.0287456	0.00488539	0.0333553	0.0303726	0.0776323	0.0406569	0.00364956	0.00381374	0.0237319	0.0120691	0.00975708	0.00164135	0	0.0954846	0.137777	0.180323	0.204385	0.109009	0.0127293	0.0326419	0.0727898	0.0239273	0.0171028	0.0257665	0.016603	0.0478065	0	0.00745707	0.0560491	0.0293423	0.0330277	0.00599306	0.0208046	0.103027	0	0	0.00118551
Gm28721	0	0	0	0	0	0.00277199	0	0	0	0	0	0	0	0	0	0	0	0	0	0	0	0	0	0	0	0	0	0	0	0	0	0	0	0	0	0	0	0	0	0	0	0	0	0	0	0	0	0	0
Gm28723	0	0	0	0	0	0	0	0	0	0	0	0	0	0	0	0	0.0045384	0.00341681	0	0	0	0	0	0	0	0	0	0	0	0.0010038	0	0	0.0142655	0	0	0	0	0	0	0	0	0	0	0	0	0	0	0	0
Gm28722	0	0	0	0	0	0.00215162	0.00285686	0	0	0.0018869	0.00100946	0	0	0	0.00396047	0.00159996	0	0.00332118	0	0	0.00302632	0	0	0	0	0.00269275	0.0025038	0.00263767	0.0027424	0.00409162	0	0.00691886	0	0	0	0	0	0.00592764	0	0	0	0	0	0	0	0	0	0	0
Cops8	0.738866	0.589576	0.636022	0.63029	0.791897	0.572935	0.494618	0.407578	0.484305	0.616401	0.62794	0.538973	0.545051	0.612859	0.651165	0.596009	0.481164	0.497547	0.370939	0.664239	0.579709	0.514705	0.560697	0.558289	0.716005	0.601407	0.514262	0.496523	0.606612	0.687742	0.5558	0.624676	0.544329	0.517723	0.642149	0.598877	0.583448	0.524639	0.600768	0.662877	0.653022	0.594208	0.488209	0.520528	0.652017	0.660195	0.560074	0.516572	0.477168
Gm9991	0	0	0	0	0	0	0	0	0	0	0	0	0.00201312	0	0	0.00225526	0.00906768	0.00342327	0.0121836	0	0	0	0	0	0.00230298	0	0	0	0	0	0	0	0	0.00435641	0	0	0	0	0	0	0	0	0.00257056	0	0	0	0	0	0
Col6a3	2.39719	1.5402	0.97898	1.62301	1.63281	3.02985	1.50056	1.18049	1.94351	1.78683	2.65497	1.51541	1.36108	2.09939	2.28429	4.28613	2.21274	1.43504	2.49965	2.40406	2.40508	1.83205	1.55108	2.54989	3.00394	5.4118	2.63523	2.56723	3.71847	3.39603	4.47151	2.48908	2.1643	3.37987	2.97685	3.03612	1.74086	1.55235	2.52297	2.57411	3.6797	1.22291	1.3212	1.79689	1.65135	1.16813	0.459886	0.134421	0.0591615
Mlph	0.00440832	0	0	0	0.00230502	0	0	0	0	0	0	0	0	0.00806764	0.00360453	0	0	0	0	0.00317477	0	0	0.0141166	0.0087493	0.012288	0	0.00485181	0	0	0.00139974	0	0	0	0	0.0024106	0	0	0	0	0	0	0	0	0	0	0	0	0	0
Prlh	0	0	0	0	0	0	0	0	0	0	0	0	0	0	0	0	0	0	0	0	0	0	0	0	0	0	0	0	0	0	0	0	0	0	0	0	0	0	0	0	0	0	0	0	0	0	0	0	0
Rab17	0	0	0	0	0	0	0	0	0	0	0	0	0	0	0	0	0	0	0	0	0	0	0	0	0	0	0	0	0	0	0	0	0	0	0	0	0	0	0	0	0.00410488	0	0	0.00362147	0	0	0	0	0
Gm28199	0	0	0	0	0	0	0	0	0	0	0	0	0	0	0	0	0	0	0	0	0	0	0	0	0	0	0	0	0	0	0	0	0	0	0	0	0	0	0	0	0	0	0	0	0	0	0	0	0
Lrrfip1	0.546349	0.604353	0.680598	0.56633	0.374499	0.478783	0.679355	0.646697	0.432088	0.3887	0.572476	0.847096	0.713097	0.668415	0.498973	0.558376	0.730044	0.705366	0.449157	0.396774	0.525218	0.613554	0.687546	0.518747	0.429488	0.629843	0.948483	0.90315	0.698904	0.586686	0.530715	0.647496	0.545021	0.333227	0.397822	0.625619	0.849018	0.887474	0.587663	0.430656	0.805177	0.862888	1.16834	0.558875	0.485742	0.197506	0.0675434	0.0305576	0.0117599
Rbm44	0.00509281	0.00525176	0.0133818	0	0	0.00251654	0.00255155	0.00169225	0.00228324	0	0.0125005	0.0224342	0.00428881	0.00653657	0.000877412	0.0268804	0	0.0294967	0	0	0.00711018	0.0101662	0.00454851	0.00489709	0	0.00443165	0.0082648	0	0.0164154	0	0.0404614	0.0630983	0.00674131	0.00300899	0	0.00199809	0.0140644	0	0	0	0.00510948	0.013844	0	0.00635501	0	0	0	0	0.000957609
Ramp1	0.0482166	0.0400445	0.0633577	0.204385	0.15938	0.753522	0.293816	0.245103	0.202532	0.185954	0.00964994	0.00697878	0.00269541	0.00338318	0.00659925	0.0138225	0.0231955	0.0135134	0.0101453	0	0.0114263	0.00892752	0.0125859	0.00221225	0.00830863	0.0611811	0.0625455	0.0655902	0.0100439	0.0493789	0.0262467	0.0509247	0.0478757	0.0135628	0.082529	0.0295792	0.0349073	0.0345111	0.0172869	0.0609341	2.70004	1.83492	1.27169	1.23376	0.958306	0.00345975	0.00496565	0.0164246	0.0033875
Ube2f	0.254653	0.330902	0.327535	0.28454	0.21144	0.340518	0.305677	0.31466	0.194821	0.269917	0.341031	0.444237	0.459167	0.338136	0.366384	0.23483	0.222119	0.22975	0.220152	0.226535	0.288523	0.411987	0.41037	0.261853	0.357736	0.317967	0.380562	0.371247	0.341871	0.311528	0.254361	0.286895	0.196964	0.21867	0.292402	0.254959	0.227177	0.339297	0.269466	0.245361	0.31247	0.488327	0.43641	0.29614	0.373116	0.527169	0.517566	0.571221	0.489065
Gm26683	0	0.008478	0	0	0	0	0.0219745	0	0	0	0.00110592	0.00184775	0.00230015	0	0	0	0	0	0	0	0.00228564	0.00594559	0	0	0	0	0	0	0	0	0	0	0.0347083	0	0	0	0	0	0	0	0	0	0	0	0	0	0.00376799	0	0.000796795
Scly	0.0194796	0.0137598	0.0465995	0.0243775	0.0248286	0.0394908	0.0177552	0.0340682	0.0309112	0.0171441	0.0440305	0.0224215	0.051087	0.0479148	0.0180659	0.0270139	0.007356	0.0131862	0.0236301	0.0370564	0.0162965	0.0549923	0.0453075	0.056989	0.016569	0.0276381	0.0557762	0.040542	0.0270975	0.0193371	0.0233881	0.0145136	0.0204648	0.0153641	0.0225228	0.0307035	0.0266505	0.0337006	0.0359767	0.0356289	0.0352031	0.0600643	0.0253794	0.0157347	0.0370843	0.0468479	0.0463325	0.0661121	0.0237816
Gm17090	0	0	0	0	0	0.00163113	0.00833794	0	0	0	0	0.00340076	0	0.00211622	0	0.00444595	0	0	0	0	0	0.00216386	0	0	0	0	0.00220881	0	0	0	0	0	0	0	0	0	0	0	0	0	0	0	0	0	0.00256171	0	0	0	0
Espnl	0	0	0	0	0	0	0	0	0	0.00111264	0	0	0.00929244	0	0.00125944	0	0	0.00341338	0	0	0	0	0	0.00221225	0	0	0	0	0	0	0	0	0	0	0	0	0	0	0	0	0	0	0.00273254	0	0	0	0.00694837	0	0
Klhl30	0	0	0	0	0	0	0	0.00212859	0	0	0	0	0	0	0	0	0	0	0	0.00337917	0	0	0	0	0	0	0	0	0	0	0	0	0	0	0	0	0	0	0	0	0	0	0.0065702	0.0020924	0	0	0	0	0
Erfe	0	0	0	0	0.00153668	0	0	0	0	0	0	0.00646194	0	0.00365191	0	0	0	0.0019048	0	0	0	0	0.00500404	0.00162044	0	0	0	0	0	0	0	0	0.018905	0	0	0	0	0	0	0	0	0.00652132	0	0	0	0	0	0	0
Ilkap	0.563876	0.657692	0.615197	0.602448	0.735946	0.564094	0.618712	0.648118	0.698451	0.677784	0.583915	0.642025	0.653037	0.621047	0.630175	0.511914	0.535372	0.576446	0.695867	0.797889	0.567597	0.687458	0.705482	0.577568	0.681082	0.570189	0.761507	0.806002	0.646407	0.688516	0.651226	0.727241	0.724098	0.716027	0.820517	0.579269	0.62234	0.690026	0.655582	0.644306	0.646251	0.695282	0.662102	0.598094	0.629339	0.890659	0.622499	0.541237	0.557128
1700020N18Rik	0	0	0	0	0	0	0	0	0	0	0	0	0	0	0	0	0	0	0	0	0	0	0	0	0	0	0	0	0	0	0	0	0	0	0	0	0	0	0	0	0	0	0	0	0	0	0	0	0
Hes6	0.214934	0.160652	0.217975	0.149863	0.180389	0.169964	0.161714	0.196367	0.145471	0.164531	0.161181	0.127753	0.152269	0.17879	0.13843	0.15873	0.169298	0.163164	0.108858	0.162402	0.116542	0.0841361	0.0941207	0.097093	0.106889	0.198246	0.11998	0.149226	0.0938377	0.170517	0.235631	0.200595	0.18965	0.166743	0.195037	0.160343	0.190592	0.160156	0.116454	0.147192	0.196604	0.144714	0.327608	0.207434	0.125511	0.306328	0.235177	0.213887	0.29944
Per2	0.0501275	0.103976	0.0465175	0.00881201	0.0231335	0.0546924	0.091868	0.0234026	0.0510406	0.0390409	0.0647643	0.0431891	0.0389447	0.0170674	0.0252361	0.0744018	0.0488022	0.0331845	0.0751651	0.0405781	0.0422399	0.0359573	0.0488735	0.0109734	0.0302841	0.0558929	0.0382541	0.0356513	0.0211951	0.0259173	0.0235252	0.0503067	0.0900533	0.0429356	0.0188594	0.0900438	0.0673553	0.0549844	0.0685147	0.0285357	0.0734473	0.0845425	0.0428143	0.0465382	0.0410875	0.138983	0.0634695	0.118327	0.117955
Gm28382	0	0	0	0	0	0	0	0	0	0	0	0	0	0	0	0	0	0	0	0	0	0	0	0	0	0	0	0	0	0	0	0	0	0	0	0	0	0	0	0	0	0	0	0	0	0	0	0	0
Traf3ip1	0.120682	0.109346	0.132087	0.130255	0.113261	0.136953	0.135508	0.117204	0.0995196	0.0965673	0.0767553	0.0874999	0.0711754	0.0924714	0.132772	0.116722	0.0913635	0.10097	0.068464	0.0980491	0.11043	0.116454	0.079988	0.0807419	0.109717	0.116059	0.139819	0.0752561	0.0682241	0.12761	0.136074	0.0907645	0.0914758	0.119871	0.143367	0.104629	0.112542	0.0836927	0.12874	0.0796168	0.107389	0.118386	0.111588	0.0928212	0.0744515	0.121731	0.161699	0.136495	0.142464
Asb1	0.0379639	0.037614	0.0354502	0.0534323	0.0618904	0.0415655	0.0608446	0.0915941	0.0407984	0.0585027	0.047302	0.0401446	0.0389257	0.0434176	0.0690787	0.0542015	0.0473537	0.0674979	0.0433829	0.0668266	0.0223919	0.044595	0.0482496	0.0466231	0.0810199	0.0347373	0.0685377	0.048019	0.0785289	0.0642197	0.0463606	0.112421	0.0718448	0.0834826	0.0728805	0.0350807	0.0523898	0.0294427	0.0488796	0.0359645	0.0355542	0.0482085	0.048905	0.0556302	0.0728071	0.0299155	0.0663126	0.0390805	0.0451231
Gm28380	0.00152353	0	0	0	0	0	0	0	0	0	0	0	0	0	0	0	0	0	0	0	0	0	0	0	0	0	0	0	0	0	0	0	0	0	0	0	0	0	0	0	0	0	0	0	0	0	0	0	0
Gm29100	0.00123162	0	0	0	0	0	0	0	0	0	0.000868199	0	0	0	0	0	0	0	0	0	0.00204172	0	0	0	0	0	0	0	0	0	0	0	0.0166613	0	0.00171764	0	0	0	0	0	0	0	0	0	0.00435785	0	0	0	0
Twist2	0.182663	0.11485	0.0593987	0.0569075	0.0576656	0.0664342	0.0580409	0.0431397	0.00975388	0.028356	0.175487	0.178311	0.180672	0.103091	0.100464	0.133101	0.0896836	0.0892349	0.0296864	0.0922705	0.0907114	0.115075	0.179188	0.0857262	0.142822	0.22006	0.136922	0.0741895	0.0766261	0.0690408	0.132652	0.125314	0.129731	0.123801	0.0761482	0.115142	0.0583778	0.0841009	0.0369904	0.0668228	0.0648844	0.0783244	0.0475148	0.00410351	0.00482712	0.051094	0.0128189	0.0554235	0.0126688
Hdac4	0.36133	0.34678	0.249232	0.282175	0.358283	0.360325	0.312144	0.285307	0.269285	0.258166	0.315215	0.273089	0.310608	0.288439	0.282739	0.293522	0.527633	0.407275	0.384065	0.329293	0.352078	0.324698	0.451159	0.356181	0.395983	0.348525	0.441316	0.411963	0.368777	0.451646	0.334776	0.376278	0.402859	0.314527	0.337118	0.369105	0.424087	0.264763	0.528802	0.399126	0.322306	0.273359	0.254745	0.19664	0.194309	0.38563	0.334209	0.409279	0.369578
Gm26720	0.00877671	0.015093	0.0227176	0.0180104	0.00869711	0.0111968	0.0314245	0.0358591	0.0162629	0.00457132	0.00593488	0.00607814	0.00918111	0.0143646	0.0128117	0.00322535	0.00786245	0.0276778	0.0368629	0.0164601	0.00574494	0.00595287	0.0250361	0.0236421	0.0166618	0.0143394	0.0286271	0.0343616	0.00829463	0.0175847	0.0193281	0.0383214	0.0503967	0.00610162	0.0160608	0.0125614	0.0366748	0	0.0253407	0.00453912	0.00933798	0.0148205	0.0223751	0.00670978	0.0117319	0.0130924	0.0319034	0.0374074	0.0204066
Gm29099	0	0	0	0	0	0	0	0	0	0	0	0	0	0	0	0	0	0	0	0	0	0	0	0	0	0	0	0	0	0	0	0	0	0	0	0	0	0	0	0	0	0	0	0	0	0	0	0	0
Ndufa10	1.18824	1.17674	1.16581	0.877541	1.23074	1.33984	1.21143	1.17496	1.04045	1.29582	1.6302	1.67427	1.66875	1.22033	1.58338	1.25208	1.0486	1.26184	0.967189	1.3442	1.44546	1.67507	1.54084	1.06828	1.37696	1.51524	1.24759	1.32948	1.13337	1.26727	1.42801	1.20602	1.13315	1.06984	1.38424	1.59365	1.27096	1.52755	1.13495	1.42419	1.29625	1.05986	1.25761	1.00285	1.26485	1.3397	1.78809	1.51613	1.52402
Olfr1416	0	0	0	0	0	0	0	0	0	0	0	0	0	0	0	0	0	0	0	0	0	0	0	0	0	0	0	0	0	0	0	0	0	0	0	0	0	0	0	0	0	0	0	0	0	0	0	0	0
Olfr1415	0	0	0	0	0	0	0	0	0	0	0	0	0	0	0	0	0	0	0	0	0	0	0	0	0	0	0	0	0	0	0	0	0	0	0	0	0	0	0	0	0	0	0	0	0	0	0	0	0
Olfr1414	0	0	0	0	0	0	0	0	0	0	0	0	0	0	0	0	0	0	0	0	0	0	0	0	0	0	0	0	0	0	0	0	0	0	0	0	0.0051387	0	0	0	0	0	0	0	0	0	0	0	0
Olfr1413	0	0	0	0	0	0	0	0	0	0	0	0	0	0	0	0	0	0	0	0	0	0	0	0	0	0	0	0	0	0	0	0	0	0	0	0	0	0	0	0	0	0	0	0	0	0	0	0	0
1700054K02Rik	0	0	0	0	0	0	0	0	0	0	0	0	0	0	0	0	0	0	0	0	0	0	0	0	0	0	0	0	0	0	0	0	0	0	0	0	0	0	0	0	0	0	0	0	0	0	0	0	0
Olfr1412	0	0	0	0	0	0	0	0	0	0	0	0	0	0	0	0	0	0	0	0	0	0	0	0	0	0	0	0	0	0	0	0	0	0	0	0	0	0	0	0	0	0	0	0	0	0	0	0	0
Olfr1411	0	0	0	0	0	0	0	0	0	0	0	0	0	0	0	0	0	0	0	0	0	0	0	0	0	0	0	0	0	0	0	0	0	0	0	0	0	0	0	0	0	0	0	0	0	0	0	0	0
Olfr1410	0	0	0	0	0	0	0	0	0	0	0	0	0	0	0	0	0	0	0	0	0	0	0	0	0	0	0	0	0	0	0	0	0	0	0	0	0	0	0	0	0	0	0	0	0	0	0	0	0
Olfr12	0	0	0	0	0	0	0	0	0	0	0	0	0	0	0	0	0	0	0	0	0	0	0	0	0	0	0	0	0	0	0	0	0	0	0	0	0	0	0	0	0	0	0	0	0	0	0	0	0
Cops9	1.05776	0.773025	1.05052	0.835475	1.24255	1.29927	1.0456	1.19903	1.05531	1.39289	1.12101	1.18175	1.14311	1.04136	1.35839	0.992069	1.01243	0.92622	0.883224	1.09061	1.16741	1.29336	1.08903	0.96491	1.24591	1.14509	1.0503	1.08207	0.984623	1.37263	1.22956	1.12199	1.162	0.903777	1.22826	0.952328	1.01415	1.0447	0.895802	1.09664	1.71442	1.50062	1.74458	1.40955	1.89401	1.38816	1.22257	1.53187	1.49958
Otos	0	0	0	0	0	0	0	0	0	0	0	0	0	0	0	0	0	0	0	0	0	0	0	0	0	0	0	0	0	0	0	0	0	0	0	0	0	0.00592764	0	0	0	0	0	0	0	0	0	0	0
Gm29483	0	0	0	0	0	0	0	0	0	0	0	0	0	0	0	0	0	0	0	0	0	0	0	0	0	0	0	0	0	0	0	0	0	0	0	0	0	0	0	0	0	0	0	0	0	0	0	0	0
Gm29482	0	0	0	0	0	0	0	0	0	0	0	0	0	0	0	0	0	0	0	0	0	0	0	0	0	0	0	0	0	0	0	0	0	0	0	0	0	0	0	0	0	0	0	0	0	0	0	0	0
Gm29481	0	0	0	0	0	0	0	0	0	0	0	0	0	0	0	0	0	0	0	0	0	0	0	0	0	0	0	0	0	0	0	0	0	0	0	0	0	0	0	0	0	0	0	0	0	0	0	0	0
Gpc1	0.351037	0.306459	0.353045	0.151427	0.178191	0.291173	0.187384	0.219956	0.123444	0.110137	0.233499	0.285948	0.303337	0.121468	0.155195	0.184921	0.263962	0.144918	0.0690963	0.0645157	0.205695	0.340157	0.366119	0.139561	0.134773	0.429385	0.530846	0.284955	0.157197	0.135125	0.277484	0.460913	0.240325	0.161956	0.153058	0.266469	0.266679	0.151941	0.146178	0.151861	0.245933	0.285024	0.441275	0.156067	0.128807	0.134289	0.219657	0.328114	0.0570932
Gm29480	0	0.00241834	0	0.012458	0	0	0	0	0	0	0.00171079	0.00251601	0	0	0	0	0	0	0	0	0	0	0.00204844	0.00145059	0	0	0.00366948	0	0	0	0	0	0	0	0	0	0.00310588	0	0.00398726	0	0	0	0	0.00287041	0	0	0	0	0
Ankmy1	0.016857	0.0268568	0.0239172	0.0306243	0.00769667	0.00867611	0.00968464	0.0111507	0.0087345	0	0.00538704	0.00718319	0.0121551	0.0102069	0.00731166	0.00206788	0	0.0105694	0.0124783	0.0124322	0.010633	0.0152666	0.0186023	0.00771915	0.00330132	0.0143257	0.0103824	0.0203474	0.0205115	0.0106842	0	0.00996562	0.0252892	0.00958515	0.0131935	0.0131594	0.0169349	0.0259461	0	0.00258529	0.0166314	0.0115392	0.0165809	0.0228552	0.0176536	0	0.0297463	0.0258064	0.00866876
Dusp28	0.0697969	0.0718259	0.0746742	0.0280612	0.0481885	0.0536904	0.0507799	0.0347522	0.0428643	0.0554714	0.0585202	0.0594711	0.0324807	0.0427029	0.0551747	0.0719785	0.034102	0.0499321	0.0643424	0.0716226	0.0570568	0.0321503	0.0341372	0.051451	0.0410704	0.056033	0.0434293	0.047417	0.0778576	0.0722293	0.0603387	0.0669104	0.137615	0.085516	0.07932	0.0521058	0.0509186	0.0475195	0.0419932	0.0513718	0.0592365	0.0440893	0.0633006	0.0409161	0.0746786	0.0855124	0.101305	0.0717608	0.0845023
5033417F24Rik	0.00360414	0.00303178	0	0	0.00202119	0.00581073	0.00292724	0.00662388	0.0185374	0.00255938	0.00322518	0.00563949	0.00211424	0.00304303	0	0.00562962	0.00854718	0.00522073	0	0.00791043	0.00792733	0.00527733	0.00454471	0	0	0	0	0	0.00841241	0.00652538	0	0	0	0.00396389	0.00172005	0.00233923	0.00703053	0	0	0.00507105	0	0	0.00930851	0	0.00161579	0.0051208	0.00481955	0	0.00227444
Rnpepl1	0.209449	0.203117	0.258296	0.173321	0.205112	0.23526	0.222062	0.260144	0.174763	0.252279	0.221893	0.24663	0.271647	0.212868	0.198497	0.209722	0.203176	0.25877	0.164011	0.257012	0.268076	0.17988	0.246457	0.206669	0.261533	0.198049	0.252308	0.260131	0.193713	0.207137	0.271603	0.28379	0.328982	0.206691	0.231256	0.199615	0.157644	0.315846	0.0784969	0.259644	0.24567	0.2885	0.220287	0.200632	0.199052	0.232104	0.312987	0.305147	0.223618
9430060I03Rik	0.0135153	0.0243787	0.0184516	0.0132597	0.00706203	0.0165846	0.0370398	0.0280229	0.0170947	0.0121576	0.014142	0.0189855	0.0120535	0.00938043	0.0103834	0.00891139	0.0170082	0.0214043	0.0272511	0.0279315	0.0139589	0.0181488	0.0102278	0.0248966	0.0149404	0.00993584	0.0152477	0.0113952	0.0329751	0.0120562	0.0556863	0.0498162	0.0416026	0.0205828	0.0285071	0.00825979	0.0279563	0.0145917	0.0178438	0.0231746	0.00583784	0.0397774	0.00733626	0.0161786	0.00562631	0.0179548	0.0365881	0.0259247	0.00592577
Capn10	0.0682909	0.0543531	0.0592598	0.0196677	0.0854709	0.0622951	0.0338773	0.0350064	0.069531	0.0637111	0.0717617	0.056738	0.0581839	0.0543273	0.0666615	0.0444973	0.0162355	0.0433203	0.0634138	0.0524439	0.0391547	0.04679	0.0688031	0.0819845	0.0854278	0.0533368	0.0440574	0.0360527	0.0695403	0.0881426	0.0678177	0.0178406	0.0917611	0.125932	0.118282	0.0310908	0.0454613	0.0226027	0	0.0498605	0.0637581	0.056802	0.0302258	0.0773716	0.0787733	0.115131	0.107898	0.0725687	0.0922036
Gpr35	0.00461499	0.00623479	0.00945796	0.00530697	0.00223958	0.00371205	0	0.00232151	0.00669782	0	0.0137875	0.00605418	0	0	0.000877412	0.00253941	0	0.00932141	0.00180385	0.00230046	0.00444073	0.0123169	0.00229719	0.0044305	0.00241566	0.00144628	0.00343265	0.00319787	0	0	0	0	0	0.00487069	0	0.00274977	0	0	0	0	0	0	0	0	0	0	0.00354917	0	0.000462419
Aqp12	0.00105575	0.00272353	0	0	0	0.0023371	0	0	0	0	0.0014797	0.00250233	0.00285892	0	0	0	0	0	0	0.0143737	0.00203302	0.00245105	0.010122	0	0	0	0	0	0	0	0	0	0	0	0	0	0	0	0	0.00239613	0	0	0	0	0	0	0	0.011311	0.0347254
Kif1a	0.0580254	0.0576622	0.0821189	0.0343923	0.0245763	0.0356188	0.00983733	0.00494476	0.0069583	0.00719282	0.01796	0.0137462	0.00416556	0.0109494	0.00689546	0.0309479	0.0253775	0.017378	0	0	0.0114544	0.0104429	0.00541756	0.00464729	0	0.0371614	0.0222393	0.037044	0.003865	0.0168275	0.0295098	0.0443642	0.0183571	0.00383591	0.0174462	0.075067	0.02118	0.0237011	0.00495788	0.0100437	0.0557225	0.0523722	0.0130242	0.00605828	0.00463333	0.0109089	0.0347938	0.0238276	0.113457
Gm28086	0	0	0	0	0	0.00149756	0	0	0	0.00110615	0	0	0	0	0.000902551	0	0	0.00377363	0	0	0	0	0	0.00229775	0	0	0	0	0.00991886	0	0	0	0	0	0	0	0.0023774	0	0	0	0.00320892	0	0	0	0	0	0	0.0105192	0.00693328
Agxt	0	0	0	0	0	0	0	0	0	0	0	0	0	0	0	0	0	0	0	0	0	0	0	0	0	0	0	0	0	0	0	0	0	0	0	0	0	0	0	0	0	0	0	0	0	0	0	0	0
2310007B03Rik	0	0	0	0	0	0	0	0	0	0	0	0	0	0	0	0	0	0	0	0	0	0	0	0	0	0	0	0	0	0	0	0	0	0	0	0	0	0	0	0	0	0	0	0	0	0	0	0	0
Crocc2	0.00724823	0.0163574	0.0152116	0	0	0	0	0	0.00362645	0	0.00409595	0.0025569	0.00204367	0	0.0014225	0.00844803	0	0.00321623	0.00414192	0.0068999	0.0020757	0	0.00317713	0.00340299	0	0	0	0	0	0	0	0.00904159	0	0	0.0129167	0	0.005765	0	0	0	0	0	0	0	0	0	0	0	0
Sned1	0.871516	1.10752	0.995598	0.809427	0.725803	0.217569	0.294302	0.401607	0.302565	0.239254	0.331436	0.234847	0.308977	0.187711	0.276192	0.441563	0.441776	0.74986	0.691798	0.533014	0.16665	0.329238	0.687158	0.637561	0.405121	0.225748	0.203478	0.198801	0.204544	0.167708	0.501226	0.438761	0.643151	0.508646	0.350344	0.425185	0.52266	0.528615	0.336323	0.224029	0.24734	0.348685	0.170436	0.188975	0.0988553	0.116456	0.193476	0.198051	0.165367
Mterf4	0.101679	0.154829	0.211243	0.143335	0.201244	0.0958851	0.102986	0.147709	0.15613	0.173111	0.0880894	0.0913795	0.167697	0.134833	0.225707	0.110492	0.111842	0.144291	0.154986	0.177691	0.0791583	0.120058	0.135409	0.118237	0.208093	0.133861	0.14556	0.187019	0.137679	0.198516	0.187715	0.221493	0.188343	0.258225	0.221595	0.0807196	0.0903267	0.144944	0.117703	0.227669	0.109061	0.150651	0.199129	0.150004	0.214007	0.187995	0.209693	0.211318	0.159498
Gm28535	0.0181825	0.0125703	0.00787709	0.00860939	0.00154748	0.00703372	0	0.0167763	0.0124543	0.00597543	0.00452375	0.0100729	0.00108826	0.00969869	0.00542119	0.00827489	0	0	0.00794454	0.00477534	0.0124315	0.00372488	0.0179919	0.0113631	0	0.00426651	0	0	0	0.00703145	0.00943291	0.0187047	0.0141377	0	0.00362753	0.010937	0.00443862	0.00856848	0.00802403	0	0.00402155	0	0	0.00289876	0	0	0.00377154	0.015677	0
Pask	0.012739	0.00908489	0	0.00420175	0.0164851	0.00307792	0.00802562	0	0.00210962	0.00393553	0.00312398	0.0154765	0	0.00401962	0.0134342	0.00522139	0	0	0.00599995	0	0.0113564	0.00814103	0.0101043	0.00305192	0.0125045	0.00588134	0.00654664	0	0.0313984	0.0033039	0.0365221	0	0	0.0104292	0.00214691	0.00773182	0	0	0	0.0188892	0.0223229	0.0292628	0.00385297	0.00443198	0.00489736	0.00939708	0	0.0106329	0.00438637
Ppp1r7	0.241437	0.233653	0.227791	0.219268	0.373348	0.295283	0.273618	0.26683	0.277629	0.330283	0.313214	0.317953	0.33734	0.337413	0.304858	0.215348	0.229545	0.187258	0.244482	0.303649	0.368852	0.343304	0.268389	0.298538	0.358104	0.343071	0.285412	0.371509	0.35593	0.336042	0.470965	0.384527	0.311596	0.354044	0.279613	0.250421	0.213948	0.185403	0.245068	0.425529	0.322625	0.342115	0.28786	0.402926	0.362685	0.394301	0.402704	0.285915	0.354195
Ano7	0	0	0	0	0	0	0	0.00171604	0	0.00253882	0.00159041	0	0.00232385	0	0.00118144	0	0	0	0	0	0	0	0.00142164	0	0	0	0	0	0	0	0	0	0	0	0.00122882	0	0	0	0	0	0	0	0	0	0	0	0	0	0
Hdlbp	2.8134	3.58209	2.78558	2.19728	1.72638	2.87144	3.91627	2.91989	2.18213	1.81804	3.44543	4.43571	4.27207	3.54035	3.17053	3.09983	3.51961	2.9101	2.37267	1.9225	3.26328	4.48366	3.68804	2.88885	2.62642	3.25245	4.29271	3.41792	2.77579	2.72527	3.05823	3.62362	2.89279	2.2781	2.0427	3.27682	4.01211	3.52772	3.54628	2.50746	2.3053	3.19089	2.77561	2.18887	1.84555	3.61218	4.0978	3.48766	3.15797
2024-09-02	0.1307	0.103749	0.090219	0.113302	0.0748784	0.128308	0.115113	0.0600155	0.0797476	0.083411	0.112531	0.0520465	0.109441	0.11316	0.111635	0.103173	0.0661708	0.0560125	0.0670435	0.0487533	0.156395	0.0987217	0.126208	0.119259	0.111262	0.13936	0.0978897	0.126176	0.193828	0.0847859	0.193453	0.14625	0.0869725	0.0595767	0.076965	0.108634	0.0758255	0.0609523	0.0998801	0.0955685	0.16611	0.0741313	0.0760784	0.0882987	0.0923174	0.112408	0.0551022	0.0862098	0.0906251
Sept2.1	0	0	0	0	0	0	0	0	0	0	0	0	0	0	0	0	0	0	0	0	0	0	0	0	0	0	0	0	0	0	0	0	0	0	0	0	0	0	0	0	0	0	0	0	0	0	0	0	0
Farp2	0.0901954	0.0906881	0.0602144	0.0869655	0.0463081	0.0450449	0.105723	0.0651053	0.0587806	0.0517358	0.0807165	0.0630797	0.0779312	0.0916343	0.0544587	0.0445042	0.0537834	0.0765395	0.110987	0.0572279	0.0771733	0.0822385	0.0594055	0.127087	0.0646369	0.0812539	0.0752331	0.0461151	0.102461	0.0515552	0.0459162	0.0793625	0.0930543	0.0916631	0.0691074	0.105536	0.0842205	0.0744154	0.103328	0.0512851	0.0437967	0.0708457	0.0541663	0.0480494	0.0263524	0.118685	0.0745197	0.05579	0.0581539
Stk25	0.440365	0.223553	0.200946	0.345949	0.433457	0.473909	0.272557	0.167819	0.389225	0.315881	0.51485	0.252079	0.243097	0.451082	0.537288	0.425189	0.233593	0.162539	0.349752	0.462048	0.541025	0.3104	0.334375	0.553229	0.605183	0.461711	0.242801	0.221024	0.439153	0.423106	0.603646	0.417279	0.243234	0.396656	0.493257	0.433204	0.165892	0.130629	0.442234	0.406331	0.419334	0.263489	0.215359	0.342412	0.350197	0.513492	0.211053	0.215517	0.408047
Gm28536	0	0.00390711	0	0	0	0	0	0.00308742	0	0	0	0	0	0	0	0	0	0	0	0	0	0	0	0	0.00186742	0.00165543	0	0	0	0	0	0	0	0	0	0	0	0	0	0	0	0	0	0	0	0	0	0	0
Bok	0.256667	0.232923	0.344125	0.203085	0.378466	0.444896	0.521267	0.929508	0.855269	0.790551	0.458642	0.496399	0.55583	0.546526	0.518275	0.279142	0.329778	0.372861	0.26952	0.469753	0.921778	1.15639	1.54715	1.02497	1.16171	0.229645	0.206592	0.277493	0.246962	0.348571	0.360901	0.31952	0.484703	0.297305	0.407489	0.292389	0.228795	0.259748	0.232179	0.231378	1.06868	0.866014	1.1946	1.53795	1.24231	1.07556	0.372686	0.41084	0.696631
Thap4	0.197762	0.197461	0.190994	0.126781	0.185634	0.219341	0.149387	0.172079	0.154115	0.169332	0.205043	0.171692	0.211388	0.150427	0.16485	0.191867	0.120957	0.194314	0.120214	0.202556	0.267139	0.175502	0.319411	0.20076	0.2393	0.238488	0.188604	0.151866	0.180712	0.18572	0.299874	0.210697	0.274132	0.270186	0.218351	0.134997	0.181932	0.109823	0.154783	0.152291	0.229816	0.177949	0.148612	0.142818	0.182294	0.234253	0.234946	0.188918	0.150646
Gm10550	0	0	0	0	0	0	0	0	0.00295802	0	0	0	0	0	0	0	0	0	0	0.00144038	0	0	0	0.00187199	0	0	0	0	0	0	0	0	0	0	0	0	0	0	0	0	0	0	0	0	0	0	0	0	0
Atg4b	0.165382	0.160997	0.305419	0.151906	0.25065	0.142817	0.157344	0.225623	0.174875	0.203058	0.178181	0.170055	0.236339	0.185681	0.228551	0.157398	0.221775	0.280332	0.149496	0.241802	0.198576	0.158498	0.265819	0.165118	0.254619	0.218319	0.169937	0.218112	0.133463	0.228441	0.251172	0.197925	0.256324	0.208048	0.203741	0.170266	0.134275	0.28243	0.144325	0.170186	0.147892	0.278088	0.208616	0.213739	0.233279	0.251773	0.237071	0.242781	0.198727
Dtymk	0.874832	0.714514	0.600793	0.586865	0.714623	0.798418	0.645854	0.577557	0.572462	0.732485	1.01902	0.898585	0.746991	0.814617	0.892897	0.727515	0.591549	0.441865	0.477856	0.498731	1.01687	1.0003	0.697086	0.783561	0.800361	1.08147	0.768432	0.507732	0.697912	0.792158	0.959999	0.883441	0.593464	0.691056	0.74053	0.864241	0.647474	0.529304	0.436617	0.66776	0.843831	0.766121	0.729399	0.750108	0.86905	1.40215	0.771723	0.65459	0.843171
Ing5	0.40044	0.41817	0.3613	0.336823	0.335262	0.362296	0.318609	0.357381	0.330605	0.284378	0.385008	0.375005	0.405085	0.400082	0.36095	0.264306	0.297203	0.284105	0.401104	0.286874	0.394838	0.388349	0.383191	0.354275	0.374778	0.373683	0.34524	0.307286	0.259315	0.283426	0.218666	0.414736	0.312728	0.300618	0.287079	0.413918	0.421009	0.392966	0.412686	0.416732	0.312556	0.371168	0.312923	0.297941	0.277233	0.497311	0.389188	0.40611	0.227271
D2hgdh	0.0446825	0.0360257	0.0608508	0.0101433	0.0922245	0.059747	0.0422708	0.0563291	0.0374191	0.0473141	0.0579921	0.0644784	0.0552229	0.0776342	0.0273961	0.0457938	0.036727	0.0223612	0.0412078	0.064302	0.0362286	0.0365785	0.0541363	0.0818919	0.0369532	0.0388195	0.0495841	0.0372812	0.0340208	0.0337679	0.04086	0.118801	0.125863	0.0956663	0.105557	0.0393876	0.0659728	0.0707141	0.0485683	0.0455199	0.0533343	0.0446578	0.00343784	0.0631988	0.049765	0.074799	0.12272	0.17891	0.0983541
Gal3st2	0	0	0	0	0	0	0	0	0	0.000744515	0.00141876	0	0	0	0.00143356	0.00601173	0	0	0	0	0.00767305	0	0.00718589	0.0058556	0	0.00185546	0.00183666	0	0.0125862	0.00230851	0.00452014	0	0	0	0	0	0	0	0	0.00421774	0	0	0	0	0	0	0	0	0
Gal3st2b	0	0	0	0	0	0	0	0	0	0	0	0	0	0	0	0	0	0	0	0	0.00257926	0	0	0	0	0	0	0	0	0	0	0	0	0	0	0.00263336	0	0	0	0	0	0.00470963	0	0	0	0	0	0	0
Gal3st2c	0	0	0	0	0	0	0	0	0.00228932	0	0	0	0	0	0.00336267	0	0	0	0	0	0	0	0	0	0	0	0	0	0	0	0	0	0	0	0	0	0	0	0	0	0	0	0	0	0	0	0	0	0
Neu4	0	0	0	0	0	0	0	0	0	0	0	0	0	0	0	0	0	0	0	0	0	0	0	0	0	0	0	0	0	0	0	0	0	0	0	0	0	0	0	0	0	0	0	0	0	0	0	0	0
Pdcd1	0	0	0	0	0	0	0	0	0	0	0	0	0	0	0	0	0	0	0	0	0	0	0	0	0	0	0	0	0	0	0	0	0	0.0148568	0	0	0	0	0	0	0	0	0	0	0	0	0	0	0
4930440C22Rik	0	0	0	0	0	0	0	0	0	0	0	0	0	0	0	0	0	0	0	0	0	0	0	0	0	0	0	0	0	0	0	0	0	0	0	0	0	0	0	0	0	0	0	0	0	0	0	0	0
Fam174a	0.304499	0.207336	0.237558	0.334841	0.407397	0.338483	0.145424	0.158912	0.27408	0.270948	0.280999	0.169624	0.170767	0.233318	0.298305	0.374663	0.14066	0.116642	0.199921	0.356805	0.282646	0.181159	0.203244	0.278823	0.360645	0.342458	0.19938	0.233433	0.312728	0.365961	0.380313	0.316881	0.105274	0.301794	0.376236	0.323507	0.179425	0.110147	0.265835	0.353825	0.380372	0.169445	0.174209	0.315963	0.35046	0.315804	0.155496	0.143485	0.273795
St8sia4	0.00158979	0	0	0	0	0	0	0	0	0.00172835	0	0	0	0	0.00169209	0	0	0	0	0	0	0	0	0	0	0	0	0	0.00383433	0	0	0	0	0	0.00541344	0.0027846	0.00417639	0	0	0	0.0038657	0	0	0	0	0	0	0	0.000758799
4930598F16Rik	0	0	0	0	0	0	0	0	0	0	0	0	0	0	0	0	0	0	0	0	0	0	0	0	0	0	0	0	0	0	0	0	0	0	0	0	0	0	0	0	0	0	0	0	0	0	0	0	0
1700063A18Rik	0	0	0	0	0	0	0	0	0	0	0	0	0	0	0	0	0	0	0	0	0	0	0	0	0	0	0	0	0	0	0	0	0	0	0	0	0	0	0	0	0	0	0	0	0	0	0	0	0
Gm29601	0	0	0	0	0	0	0	0	0	0	0	0	0	0	0	0	0	0	0	0	0	0	0	0	0	0	0	0	0	0	0	0	0	0	0	0	0	0	0	0	0	0	0	0	0	0	0	0	0
4930533P14Rik	0	0	0	0	0	0	0	0	0	0	0	0	0	0	0	0	0	0	0	0	0	0	0	0	0	0	0	0	0	0	0	0	0	0	0	0	0	0	0	0	0	0	0	0	0	0	0	0	0
Slco4c1	0	0	0	0	0	0	0	0	0	0	0	0	0	0	0	0	0	0	0	0	0	0	0	0	0	0	0	0	0	0	0	0	0	0	0	0	0	0	0	0	0	0	0	0	0	0	0	0	0
Panct2	0	0	0	0	0	0	0	0	0	0	0	0	0	0	0	0	0	0	0	0	0	0	0	0	0	0	0	0	0	0	0	0	0	0	0	0	0	0	0	0	0	0	0	0	0	0	0	0	0
Gm28901	0	0	0	0	0	0	0	0.0039692	0	0	0.000937254	0	0	0	0	0	0	0	0	0	0	0.00213706	0	0	0	0	0	0	0	0	0	0	0	0	0	0	0	0	0	0	0	0	0	0	0	0	0	0	0
Slco6c1	0	0	0	0	0	0	0	0	0	0	0	0	0	0	0	0	0	0	0	0	0	0	0	0	0	0	0	0	0	0	0	0	0	0	0	0	0	0	0	0	0	0	0	0	0	0	0	0	0
D1Ertd622e	0.128405	0.101425	0.104595	0.150742	0.0692979	0.104873	0.0634592	0.0656329	0.117135	0.0896756	0.0197571	0.0301511	0.0266463	0.0327446	0.0359293	0.0702656	0.0390114	0.0277751	0.0365822	0.0881569	0.0195771	0.0611543	0.0352759	0.0483708	0.0309815	0.056151	0.0702074	0.0987196	0.0513119	0.103307	0.0982653	0.0305066	0.0847081	0.0759423	0.0947959	0.0473404	0.0780841	0.0833769	0.0653417	0.0565741	0.120997	0.103202	0.106231	0.13045	0.104363	0.0358073	0.0951885	0.0593694	0.0708539
Ppip5k2	0.200285	0.216234	0.169594	0.207651	0.182121	0.133397	0.127867	0.0940025	0.127573	0.114179	0.143873	0.0972125	0.114687	0.194085	0.120353	0.157249	0.120069	0.0732161	0.154848	0.0872573	0.176753	0.136929	0.133139	0.15084	0.135315	0.191863	0.0984844	0.101796	0.145122	0.141709	0.277806	0.310827	0.162123	0.239981	0.182158	0.149752	0.164101	0.0489909	0.143839	0.137643	0.0917134	0.0894383	0.069509	0.149434	0.0654564	0.170088	0.117517	0.074991	0.153581
Gin1	0.139396	0.0788152	0.0980784	0.138802	0.12631	0.148143	0.0872212	0.128679	0.143707	0.127967	0.120799	0.0976984	0.110598	0.132774	0.154957	0.20219	0.120121	0.124909	0.143848	0.135293	0.16892	0.0990667	0.125931	0.154865	0.149143	0.122542	0.0687396	0.083617	0.103444	0.122818	0.163632	0.118664	0.167368	0.285169	0.207398	0.0988659	0.0808787	0.143209	0.053535	0.100294	0.120014	0.127862	0.105342	0.122339	0.132169	0.196792	0.272356	0.180715	0.220816
Pam	2.06553	2.02972	2.08229	2.01515	1.66122	1.50724	1.06944	0.865075	0.657406	0.610333	0.798689	0.524655	0.447715	0.560876	0.3772	1.02065	0.90319	0.536489	0.501474	0.608093	0.900889	0.639066	0.737836	0.847898	0.548133	1.83076	1.38548	1.40409	1.28396	1.23284	1.88758	1.58663	1.32443	1.31217	1.03102	1.18866	1.00517	0.77507	0.675837	0.753785	1.45514	1.39086	1.0904	0.896897	0.650774	0.209104	0.270919	0.307842	0.230335
1810006J02Rik	0	0	0	0	0	0	0	0	0	0	0.00144996	0	0	0	0	0	0	0	0	0	0	0	0	0	0	0	0	0	0	0	0	0	0	0	0	0	0.00695862	0	0	0	0	0	0	0	0	0	0	0	0
Gm29461	0	0	0	0	0	0	0	0	0	0	0	0	0	0	0	0	0	0	0	0	0	0	0	0	0	0	0	0	0	0	0	0	0	0	0	0	0	0	0	0	0	0	0	0	0	0	0	0	0
Slco6d1	0	0	0	0	0	0	0	0	0	0	0	0	0	0	0	0	0	0	0	0	0	0	0	0	0	0	0	0	0	0	0	0	0	0	0	0	0	0	0	0	0	0	0	0	0	0	0	0	0
Gm7967	0	0	0.017738	0	0	0	0	0	0	0	0	0	0	0	0	0	0	0	0	0	0.000861209	0	0	0.00144144	0	0	0	0	0	0	0	0	0	0	0	0	0	0.00552147	0	0.00341199	0	0	0	0	0	0	0.00887179	0	0
Cntnap5b	0	0	0	0	0	0	0	0	0	0	0	0	0	0	0	0	0	0	0	0	0	0	0	0	0	0	0	0	0	0	0	0	0	0	0	0	0	0	0	0	0	0	0	0	0	0	0	0	0
Gm20268	0	0	0	0	0	0	0	0	0	0	0	0	0	0	0	0	0	0	0	0	0	0	0	0	0	0	0	0	0	0	0	0	0	0	0	0	0	0	0	0	0	0	0	0	0	0	0	0	0
Gm28187	0	0	0	0	0	0	0	0.00445002	0.0227085	0.0155081	0.000663354	0.00154554	0	0.0133547	0.00653687	0.00333249	0.00619576	0.02196	0.0531595	0.0162245	0	0.00724994	0.00391405	0.0327269	0.0168525	0	0	0	0.00264324	0.00342396	0	0	0	0.00611724	0.0167175	0	0.0051387	0	0.0149241	0.0179883	0	0	0.0021416	0.0108046	0.00489279	0	0	0.00302233	0.00544905
Cdh20	0	0	0	0	0	0	0	0	0	0	0.00086396	0	0	0	0	0	0	0	0	0	0	0	0	0	0	0	0	0	0	0	0	0	0	0	0	0	0	0	0	0	0	0	0	0	0	0	0	0	0
Gm15699	0	0	0	0	0	0	0	0	0	0	0	0	0	0	0	0	0	0	0	0	0	0	0	0	0	0	0	0	0	0	0	0	0	0	0	0	0	0	0	0	0	0	0	0	0	0	0	0	0
Gm29012	0	0	0	0	0	0	0	0	0	0	0	0	0	0	0	0	0	0	0	0	0	0	0	0	0	0	0	0	0	0	0	0	0	0	0	0	0	0	0	0	0	0	0	0	0	0	0	0	0
Rnf152	0.0390548	0.0341615	0.0471699	0.0335581	0.0209309	0.0202964	0	0.0105656	0	0.00176821	0.00558963	0.00158936	0.00566493	0	0.00222362	0	0	0.0121983	0	0	0	0.00572994	0.00598868	0	0	0.00452703	0.00161713	0.00382686	0.0280263	0.00576437	0	0.0204795	0	0.00389312	0.0049194	0.0134628	0.0142336	0.00963434	0	0.00554628	0.00796791	0	0	0	0	0	0	0	0.00148695
Gm17634	0	0	0	0	0	0	0	0	0	0	0	0	0	0	0	0	0	0	0	0	0	0	0	0	0	0.00285804	0	0	0	0	0	0	0	0	0	0	0	0	0	0	0	0	0	0	0	0	0	0	0
Pign	0.121943	0.0615438	0.0673242	0.128952	0.129203	0.130968	0.0818212	0.0991593	0.0849131	0.0597543	0.0945923	0.0839964	0.0773395	0.102532	0.0854018	0.128476	0.0854354	0.0970304	0.127941	0.0915621	0.123554	0.0913814	0.0911027	0.186664	0.11191	0.112761	0.0682885	0.0768044	0.113634	0.153258	0.242601	0.120279	0.13793	0.225069	0.122447	0.114586	0.0746053	0.0563382	0.116519	0.0561562	0.0703005	0.0802575	0.0872094	0.0687937	0.0453995	0.0835188	0.12546	0.154674	0.18335
2310035C23Rik	0.197348	0.142668	0.123762	0.2144	0.23869	0.241399	0.154113	0.216599	0.176886	0.239279	0.185239	0.136992	0.173558	0.19994	0.244156	0.172873	0.120832	0.146253	0.225672	0.259059	0.181272	0.115682	0.158415	0.205688	0.211477	0.178816	0.152162	0.167289	0.187003	0.223406	0.253763	0.32312	0.274496	0.361325	0.245851	0.196112	0.11817	0.211699	0.233148	0.239507	0.275243	0.168655	0.214388	0.189213	0.171036	0.365572	0.215303	0.213738	0.231299
Tnfrsf11a	0	0	0	0	0	0.00135476	0	0	0	0	0	0	0	0	0	0	0	0	0	0	0.00225526	0	0	0	0	0	0	0	0	0	0	0	0	0	0	0	0	0	0	0	0.0386043	0.0452711	0.022327	0.0312418	0.0125953	0.00816793	0	0	0.000611954
Gm7160	0.0235586	0	0	0.00788157	0	0.0143505	0.00468384	0.00736344	0.0203208	0.00671663	0.010491	0	0.00346851	0.0106315	0.00833754	0.0130495	0	0.00300132	0.0118507	0.0126478	0.00908821	0.00390961	0.0194162	0.0107606	0.0180616	0.00305723	0.00265372	0	0.0148667	0.0202152	0.00989864	0.0318322	0.0152648	0.0274868	0.0207519	0.0109081	0.0178539	0	0.0250513	0	0.00519443	0.00784002	0	0.00963708	0	0.0101225	0.0551552	0.00700272	0.0177151
Zcchc2	0.0902671	0.132483	0.0886161	0.12861	0.0734257	0.0935406	0.0837124	0.12682	0.102638	0.0877365	0.0874243	0.0759545	0.081154	0.0978747	0.0657415	0.113513	0.102857	0.0951718	0.140714	0.122825	0.0727693	0.090785	0.0847825	0.0796043	0.105174	0.0891765	0.114938	0.108053	0.111802	0.102986	0.0662478	0.190325	0.0360736	0.169303	0.117748	0.0916189	0.060248	0.157032	0.121589	0.109646	0.0923988	0.0753442	0.0959475	0.0589002	0.0893374	0.0513276	0.0992815	0.110002	0.130594
Gm20753	0	0	0	0	0	0	0	0	0.00223454	0.00449778	0	0	0	0	0.00172061	0	0	0	0	0	0	0	0	0	0	0	0	0	0	0	0	0	0	0	0	0	0	0	0	0.0039939	0	0	0	0	0	0	0	0.00426659	0
Phlpp1	0.253408	0.234341	0.240601	0.158556	0.228909	0.194267	0.216715	0.223583	0.206488	0.194862	0.125359	0.101483	0.124515	0.116242	0.162963	0.139627	0.1597	0.228595	0.197587	0.187128	0.128086	0.0818903	0.0961777	0.16676	0.135359	0.170449	0.161219	0.203781	0.189205	0.149716	0.133096	0.176964	0.201402	0.145309	0.177791	0.227674	0.253043	0.243156	0.291657	0.246523	0.161092	0.173597	0.141609	0.117518	0.170918	0.181229	0.191359	0.115606	0.180109
A530053M12Rik	0	0	0	0	0	0	0	0	0.00284881	0	0	0	0	0	0	0	0	0	0	0.00135649	0	0	0	0	0.00162277	0	0	0	0	0	0	0	0	0	0	0	0	0	0	0	0	0	0	0	0	0	0	0	0
Bcl2	0.755125	0.668427	0.432978	0.797077	0.778719	0.534331	0.499815	0.416176	0.465782	0.396201	0.418847	0.452636	0.386745	0.411145	0.354669	0.348113	0.52056	0.483707	0.466404	0.467122	0.62642	0.566729	0.538637	0.543404	0.52793	0.554473	0.571702	0.481736	0.272131	0.365631	0.879674	0.885662	0.634837	0.517799	0.44151	0.436382	0.383144	0.379176	0.338913	0.417182	0.627298	0.770156	0.40448	0.479273	0.288596	0.168337	0.13609	0.101879	0.0502692
D630008O14Rik	0	0.00370901	0	0	0	0	0.00312053	0	0.00583547	0	0	0.00271485	0	0	0	0	0	0	0	0	0.00416556	0.00178619	0.0021816	0.00283608	0	0	0	0	0	0	0	0	0	0	0	0	0.0043633	0	0	0	0	0	0.00458085	0	0	0	0	0	0
Kdsr	0.262304	0.209106	0.234318	0.237363	0.319987	0.271658	0.175095	0.198321	0.297542	0.27853	0.257841	0.190494	0.217115	0.258774	0.258451	0.318854	0.213909	0.235155	0.3616	0.23293	0.316781	0.259254	0.254654	0.352107	0.274326	0.234005	0.210847	0.249252	0.23556	0.21838	0.333364	0.293733	0.301966	0.380385	0.307413	0.272554	0.251332	0.170882	0.308643	0.270453	0.207879	0.196177	0.117701	0.207061	0.174123	0.349493	0.181045	0.139191	0.238828
Vps4b	0.530751	0.569596	0.485773	0.422613	0.531177	0.490258	0.502207	0.485809	0.468915	0.624013	0.508815	0.540317	0.637866	0.539846	0.571731	0.487297	0.364162	0.553685	0.576826	0.610194	0.650956	0.502328	0.634606	0.475834	0.770045	0.459446	0.427322	0.521328	0.500433	0.57395	0.539862	0.653912	0.456249	0.557031	0.53993	0.508471	0.524047	0.589292	0.613067	0.522235	0.604368	0.648767	0.495459	0.467329	0.504989	0.676359	0.774291	0.868354	0.863221
Serpinb5	0	0	0	0	0	0	0	0	0	0	0	0	0	0	0	0	0	0	0	0	0	0	0	0	0	0	0	0	0	0	0	0	0	0	0	0	0	0	0	0	0	0	0	0	0	0	0	0	0
Serpinb12	0	0	0	0	0	0	0	0	0	0	0	0	0	0	0	0	0	0	0	0	0	0	0	0	0	0	0	0	0	0	0	0	0	0	0	0	0	0	0	0	0	0	0	0	0	0	0	0	0
Serpinb13	0	0	0	0	0	0	0	0	0	0	0	0	0	0	0	0	0	0	0	0	0	0	0	0	0	0	0	0	0	0	0	0	0	0	0	0	0	0	0	0	0	0	0	0	0	0	0	0	0
Serpinb3a	0	0	0	0	0	0	0	0	0	0	0	0	0	0	0	0	0	0	0	0	0	0	0	0	0	0	0	0	0	0	0	0	0	0	0	0	0	0	0	0	0	0	0	0	0	0	0	0	0
Serpinb3d	0	0	0	0	0	0	0	0	0	0	0	0	0	0	0	0	0	0	0	0	0	0	0	0	0	0	0	0	0	0	0	0	0	0	0	0	0	0	0	0	0	0	0	0	0	0	0	0	0
Serpinb3b	0	0	0	0	0	0	0	0	0	0	0	0	0	0	0	0	0	0	0	0	0	0	0	0	0	0	0	0	0	0	0	0	0	0	0	0	0	0	0	0	0	0	0	0	0	0	0	0	0
Serpinb3c	0	0	0	0	0	0	0	0	0	0	0	0	0	0	0	0	0	0	0	0	0	0	0	0	0	0	0	0	0	0	0	0	0	0	0	0	0	0	0	0	0	0	0	0	0	0	0	0	0
Serpinb11	0	0	0	0	0	0	0	0	0	0	0	0	0	0	0	0	0	0	0	0	0	0	0	0	0	0	0	0	0	0	0	0	0	0	0	0	0	0	0	0	0	0	0	0	0	0	0	0	0
Gm15391	0	0	0	0	0	0	0	0	0	0	0	0	0	0	0	0	0	0	0	0	0	0	0	0	0	0	0	0	0	0	0	0	0	0	0	0	0	0	0	0	0	0	0	0	0	0	0	0	0
Serpinb7	0	0	0	0	0	0	0	0	0	0	0	0	0	0	0	0	0	0	0	0	0	0	0	0	0	0	0	0	0	0	0	0	0	0	0	0	0	0	0	0	0	0	0	0	0	0	0	0	0
Serpinb2	0	0	0	0	0	0	0	0	0	0	0	0	0	0	0	0	0	0	0	0	0	0	0	0	0	0	0	0	0	0	0	0	0	0	0	0	0	0	0	0	0	0	0	0	0	0	0	0	0
Serpinb8	0	0	0	0	0	0	0	0.00220967	0	0.00218559	0	0	0.00384999	0	0	0	0	0.00468758	0	0.0022865	0	0	0	0	0	0	0	0	0	0.00426778	0	0	0	0	0.00372161	0	0	0	0	0	0	0	0	0.00229928	0	0.0114382	0	0	0.000920764
Gm15389	0	0	0	0	0	0	0	0	0	0	0.000915941	0	0	0	0	0	0	0	0	0	0	0	0	0	0	0	0	0	0	0	0	0	0	0	0	0	0	0	0	0	0	0	0	0	0	0	0	0	0
D830032E09Rik	0	0	0	0	0	0	0	0	0	0	0	0	0	0	0	0	0	0	0	0	0	0	0	0	0	0	0	0	0	0	0	0	0	0	0	0	0	0	0	0	0	0	0	0	0	0	0	0	0
Cdh7	0	0	0	0	0	0	0	0	0	0	0	0	0	0	0	0	0	0	0	0	0	0	0	0	0	0	0	0	0	0	0	0	0	0	0	0	0	0	0	0	0	0	0	0	0	0	0	0	0
Cdh19	0	0	0	0	0	0	0	0	0	0	0	0	0	0	0.00512562	0	0	0	0	0	0	0	0	0	0	0	0	0	0	0	0	0	0	0	0	0	0	0	0	0	0	0	0	0	0	0	0	0	0
Gm29088	0	0	0	0	0	0	0	0	0	0	0	0	0	0	0	0	0	0	0	0	0	0	0	0	0	0	0	0	0	0	0	0	0	0	0.000827564	0	0	0	0	0	0	0	0	0	0	0	0	0	0
Dsel	0.332273	0.398474	0.373263	0.399767	0.323666	0.477624	0.377942	0.293407	0.481672	0.357099	0.319391	0.306424	0.276556	0.287503	0.346697	0.46854	0.426674	0.331668	0.487016	0.487043	0.286939	0.274804	0.319011	0.452662	0.441694	0.455418	0.515947	0.334079	0.536071	0.365246	0.599858	0.462523	0.436293	0.668001	0.477166	0.411575	0.31189	0.384945	0.412418	0.400594	0.424449	0.260998	0.28126	0.397051	0.298327	0.0825955	0.0795552	0.108599	0.101983
Gm28189	0	0	0	0	0	0	0	0	0	0	0	0	0	0	0	0	0	0	0	0	0	0	0	0	0	0	0	0	0	0	0	0	0	0	0	0	0	0	0	0	0	0	0	0	0	0	0	0	0
9330185C12Rik	0	0	0	0	0	0	0	0	0	0	0	0	0	0	0	0	0	0	0	0	0	0	0	0	0	0	0	0	0	0	0	0	0	0	0	0	0	0	0	0	0	0	0	0	0	0	0	0	0
Cntnap5a	0	0.00196684	0	0	0	0.00194803	0	0	0.00107523	0	0	0	0	0	0	0	0	0	0	0	0.0023726	0	0	0	0	0.00279557	0.00347296	0	0	0	0.00333695	0.00560664	0	0	0	0.00262355	0	0	0	0	0.00983598	0	0	0	0	0	0	0	0
Gm19965	0	0	0	0	0	0	0	0	0	0	0	0	0	0	0	0	0	0	0	0	0	0	0	0	0	0	0	0	0	0	0	0	0	0	0	0	0	0	0	0	0	0	0	0	0	0	0	0	0
Zfp813-ps	0	0	0	0	0	0	0	0	0	0	0	0	0	0	0	0	0	0	0	0	0	0	0	0	0	0	0	0	0	0	0	0	0	0	0	0	0	0	0	0	0	0	0	0	0	0	0	0	0
Gm28363	0	0	0	0	0	0	0	0	0	0	0	0	0	0	0	0	0	0	0	0	0	0	0	0	0	0	0	0	0	0	0	0	0	0	0	0	0	0	0	0	0	0	0	0	0	0	0	0	0
B020011L13Rik	0	0	0	0	0	0	0	0	0	0	0	0	0	0	0	0	0	0	0	0	0	0	0	0	0	0	0	0	0	0	0	0	0	0	0	0	0	0	0	0	0	0	0	0	0	0	0	0	0
Gm28360	0	0	0	0	0	0	0	0	0	0	0	0	0	0	0	0	0	0	0	0	0	0	0	0	0	0	0	0	0	0	0	0	0	0	0	0	0	0	0	0	0	0	0	0	0	0	0	0	0
Gm28168	0	0	0	0	0	0	0	0	0	0	0	0	0	0	0	0	0	0	0	0	0	0	0	0	0	0	0	0	0	0	0	0	0	0	0	0	0	0	0	0	0	0	0	0	0	0	0	0	0
Gm7145	0	0	0	0	0	0	0	0	0	0	0	0	0	0	0	0	0	0	0	0	0	0	0	0	0	0	0	0	0	0	0	0	0	0	0	0	0	0	0	0	0	0	0	0	0	0	0	0	0
Gm29106	0	0	0	0	0	0	0	0	0	0	0	0	0	0	0	0	0	0	0	0	0	0	0	0	0	0	0	0	0	0	0	0	0	0	0	0	0	0	0	0	0	0	0	0	0	0	0	0	0
Tsn	1.26263	1.47594	1.26955	1.25747	1.65337	1.26119	1.26196	1.16548	1.10047	1.48731	1.36994	1.50537	1.54315	1.25026	1.52952	1.34299	1.10551	1.2192	1.14036	1.49205	1.63522	1.88142	1.63486	1.38174	1.83983	1.31339	1.48175	1.2256	1.08804	1.50982	1.48475	1.89943	1.48464	1.24908	1.61344	1.26586	1.36872	1.20062	1.15428	1.6285	1.14084	1.43317	1.37567	1.08723	1.42998	1.47143	1.58089	1.67321	1.58903
Nifk	0.411065	0.449579	0.268455	0.180733	0.472974	0.3105	0.340383	0.350214	0.230946	0.397135	0.609161	0.566128	0.701191	0.464129	0.619078	0.393519	0.232247	0.306254	0.134239	0.394424	0.535255	0.560543	0.550299	0.389434	0.576451	0.33806	0.474241	0.293849	0.244028	0.432011	0.375963	0.616647	0.486246	0.239836	0.436474	0.385997	0.295009	0.411015	0.220122	0.467445	0.343778	0.382095	0.322564	0.184225	0.290457	0.846943	0.696442	0.62838	0.408089
Gm28867	0	0	0	0	0	0	0	0	0	0	0	0	0	0	0	0	0	0	0	0	0	0	0	0	0	0	0	0	0	0	0	0	0	0	0	0	0	0	0	0	0	0	0	0	0	0	0	0	0
Clasp1	0.387278	0.39379	0.420019	0.37413	0.405728	0.275918	0.349205	0.386445	0.369293	0.317602	0.301309	0.314265	0.320074	0.408553	0.264931	0.281894	0.335501	0.356542	0.40546	0.357507	0.348788	0.268818	0.300038	0.349948	0.283235	0.340097	0.335644	0.396162	0.372822	0.358993	0.510395	0.308677	0.555227	0.530118	0.295325	0.302271	0.339903	0.301344	0.364774	0.310128	0.333905	0.31485	0.287556	0.342388	0.312158	0.41472	0.312651	0.297337	0.214954
2900060B14Rik	0.110339	0.14393	0.151145	0.216523	0.276255	0.0785325	0.116871	0.089583	0.111247	0.146594	0.0588746	0.0920774	0.0770746	0.0927476	0.100447	0.0643873	0.104468	0.0810556	0.182195	0.155572	0.0344726	0.0657956	0.071384	0.118701	0.0977333	0.0798562	0.121883	0.0821301	0.0826966	0.132885	0.150812	0.280327	0.174289	0.218084	0.12252	0.0553524	0.0978561	0.0521859	0.107791	0.106799	0.0532026	0.0927617	0.0595213	0.0625775	0.104367	0.0714337	0.0590111	0.0573998	0.0517816
Tfcp2l1	0.0109502	0	0.0068102	0.00533193	0.00851677	0	0	0.00569925	0	0	0.00268812	0.00236546	0.00250565	0	0	0	0.0045384	0	0	0.00641748	0	0.00163471	0	0	0	0	0.00316772	0	0	0.00237708	0	0.00692389	0	0	0	0.00285487	0.00581575	0	0	0	0.0235697	0.00364437	0.0202778	0.00410351	0.00162543	0	0.00922491	0.00741224	0.00436129
Gli2	0.191544	0.135793	0.133298	0.188907	0.173857	0.199849	0.169781	0.192775	0.191467	0.193032	0.199988	0.142445	0.170619	0.281897	0.248179	0.14586	0.146322	0.183724	0.147681	0.144418	0.123588	0.0843215	0.10055	0.125632	0.140369	0.207015	0.180477	0.257532	0.216847	0.207265	0.243252	0.183549	0.0963107	0.135505	0.128493	0.204432	0.195691	0.156474	0.179993	0.213264	0.156901	0.150706	0.140812	0.146083	0.182719	0.0232392	0.0343963	0.0257783	0.00422192
Gm26831	0.00117426	0	0	0.0132516	0.00434031	0.00485847	0	0	0	0.00405629	0.00219484	0.00637914	0.00182226	0.00338478	0.00440873	0.00387078	0	0.0112173	0.00691553	0	0	0	0	0	0.00109929	0	0	0	0	0	0.00989864	0	0	0	0.00149538	0	0	0	0	0	0.00531814	0.00550285	0	0	0.00348513	0	0	0	0.000302304
Gm29456	0	0	0	0	0	0	0	0	0	0	0	0	0	0	0	0	0	0	0	0	0	0	0	0	0	0	0	0	0	0	0	0	0	0	0	0	0	0	0	0	0	0	0	0	0	0	0	0	0
Gm29455	0	0	0	0	0	0	0	0	0	0	0	0	0	0	0	0	0	0	0	0	0	0	0	0	0	0	0	0	0	0	0	0	0	0	0	0	0	0	0	0	0	0	0	0	0	0	0	0	0
Inhbb	0.0436602	0.0817701	0.068393	0.0132243	0.0861308	0.0396112	0.10214	0.0768037	0.0118477	0.0809188	0.023767	0.0780792	0.0317964	0.00609438	0.0569551	0.0209726	0.12431	0.0460416	0.0168619	0.101168	0.0231645	0.0751904	0.040118	0.0108861	0.0378982	0.0229238	0.0608625	0.0841142	0.0287191	0.0392805	0.0574913	0.111629	0.0747977	0.0297576	0.117893	0.0180869	0.140679	0.0510049	0.00825716	0.048665	0.0596882	0.158998	0.0811947	0.0724619	0.0906551	0.119809	0.183014	0.0118919	0.00832354
Ralb	0.27331	0.200831	0.189976	0.375799	0.240978	0.220149	0.169882	0.179212	0.300923	0.233736	0.371206	0.200977	0.250029	0.487997	0.302209	0.238408	0.184142	0.234366	0.358076	0.321584	0.564804	0.453981	0.6135	0.72205	0.661298	0.347524	0.249173	0.240394	0.39193	0.396407	0.346118	0.206233	0.242105	0.355205	0.280562	0.241972	0.182749	0.190526	0.345342	0.317816	0.2824	0.199288	0.22207	0.348511	0.274227	0.152173	0.0863334	0.119934	0.184219
Gm27184	0.00181534	0.00468974	0.00460895	0	0.00296309	0	0	0	0.00453753	0.00385255	0.00386565	0.00738666	0	0.00211622	0.00372253	0.0022929	0	0.00347315	0.0032271	0	0.00189147	0	0.00246667	0.00309127	0	0.00669666	0.00492615	0	0	0	0	0	0.012135	0	0.00132165	0.00445165	0.00283683	0	0.00825716	0.00460999	0	0.00644449	0	0	0.00308522	0	0.00428655	0.00436312	0.0096607
Tmem185b	0.0875386	0.0524587	0.0559497	0.0971749	0.0767944	0.093391	0.0624077	0.0377825	0.0562107	0.0954351	0.124667	0.0602025	0.0578939	0.0736371	0.154125	0.0918921	0.0278908	0.03823	0.070734	0.12639	0.13053	0.0647706	0.100693	0.0868389	0.115405	0.0829412	0.0511573	0.0818771	0.0700873	0.125704	0.103703	0.0117024	0.00288375	0.116684	0.109685	0.0716238	0.0180761	0.0580215	0.0536482	0.0857558	0.104573	0.0556297	0.0706642	0.065225	0.067793	0.309194	0.0559058	0.129237	0.0932226
3830432H09Rik	0	0.00237359	0	0	0	0	0	0	0.000767128	0.00140349	0	0	0	0	0	0.00222297	0	0.00453806	0	0	0.00231041	0.00210909	0	0	0	0	0.00163568	0	0	0	0	0	0	0	0.000848325	0.00203828	0.00809238	0	0	0	0	0	0	0.00353609	0	0	0	0	0
Epb41l5	0.267472	0.246887	0.243494	0.204639	0.212034	0.151662	0.162982	0.089417	0.0982805	0.0906889	0.0938667	0.0749812	0.12552	0.0953814	0.0829829	0.147908	0.108931	0.140328	0.135687	0.103144	0.0788578	0.0750894	0.0492265	0.0875079	0.0627857	0.169285	0.142701	0.127371	0.0968256	0.130133	0.145082	0.204325	0.191149	0.175058	0.129562	0.178574	0.150485	0.19483	0.122203	0.188726	0.114102	0.142761	0.123452	0.0848301	0.0857815	0.349686	0.210113	0.198422	0.142931
Ptpn4	0.132188	0.0861243	0.0752569	0.128875	0.127592	0.0890096	0.0942135	0.0717234	0.106386	0.123936	0.0943593	0.0707732	0.0685302	0.0960704	0.0906793	0.0953388	0.0631818	0.0858611	0.0858862	0.0828671	0.0837324	0.0745476	0.0645093	0.080282	0.0803792	0.102921	0.0847319	0.0337545	0.12225	0.0703899	0.116403	0.169447	0.0469876	0.127114	0.0779428	0.128006	0.108421	0.113589	0.168964	0.0861239	0.141406	0.0491577	0.0516695	0.0994525	0.0939769	0.189314	0.173894	0.302254	0.486291
Gm28209	0	0	0	0	0	0	0	0	0	0	0	0	0	0	0	0	0	0	0	0	0	0	0	0	0	0	0	0	0	0	0	0	0	0	0	0	0	0	0	0	0	0	0	0	0	0	0	0	0
Tmem177	0.00596763	0.0123698	0.00550333	0.0139518	0.0690197	0.00770996	0.00275138	0.0129587	0.00796373	0.0258283	0.0044738	0.0170965	0.00443802	0.0142955	0.0214107	0.0015195	0.00408137	0.0151512	0.00694329	0.0033058	0.00933458	0.00612031	0.0126527	0.00159225	0.0280715	0.0171283	0.0165622	0.0133093	0.0216313	0.028577	0.0140585	0.0255468	0.0391157	0.0038032	0.0405332	0.00434838	0	0	0	0.0134737	0.02764	0.00975271	0.0156064	0.0302017	0.0405878	0.0227825	0.0370169	0.0480959	0.0480231
Cfap221	0	0	0	0	0	0	0	0	0	0	0	0	0	0	0	0	0	0	0	0	0	0	0	0	0	0	0	0	0	0	0	0	0	0	0	0	0	0	0	0	0	0	0	0	0	0	0	0	0
Sctr	0	0	0	0	0	0	0	0	0	0	0	0.00191672	0	0	0	0	0	0.00800489	0	0	0	0	0.00234019	0.00898249	0	0	0	0	0	0	0	0	0	0	0	0	0	0	0	0	0	0	0	0	0	0	0	0	0
Tmem37	0.0910524	0.103294	0.135547	0.166633	0.219228	0.0357825	0.0483181	0.105456	0.0638053	0.107372	0.0423571	0.0715874	0.127975	0.073885	0.129401	0.034987	0.20384	0.202037	0.274503	0.529252	0.0217757	0.0868565	0.152829	0.170633	0.287768	0.0287514	0.0729559	0.157685	0.225505	0.313437	0.102978	0.0988788	0.195664	0.400695	0.349136	0.0833387	0.0585751	0.0892163	0.151849	0.219577	0.0126038	0	0.0093097	0.0164132	0.0163247	0.00536596	0.00388038	0.0118312	0.0211274
Dbi	1.78303	1.63546	1.661	1.61411	2.01749	2.45011	2.35882	2.31122	3.12774	3.49162	2.93644	2.83676	2.70736	3.10226	3.46832	2.24924	1.95168	1.98997	1.83706	2.4987	3.25492	3.19115	2.97053	2.87923	3.3707	2.83348	2.99474	2.98313	2.97833	3.48648	2.46963	2.15635	2.76839	2.48049	2.85453	2.12317	1.89139	2.04781	2.0111	2.66872	1.86154	2.32735	3.25473	4.25702	3.98995	4.46815	4.38085	5.47094	10.141
3110009E18Rik	0.0455119	0.0337579	0.052909	0.0279377	0.0673517	0.0606035	0.0265348	0.038497	0.0506127	0.0978146	0.0663447	0.0404329	0.0701595	0.0669955	0.107431	0.0687456	0.0326013	0.00539379	0.040665	0.0854821	0.0716537	0.0440687	0.0302663	0.0449653	0.0843354	0.0896292	0.0520425	0.0635289	0.046023	0.0951816	0.06235	0.031365	0.0332173	0.0609967	0.0967784	0.0694266	0.0543687	0.0644961	0.0345019	0.0729353	0.101519	0.0420004	0.0241516	0.0537522	0.0997617	0.0564913	0.028449	0.0632971	0.0526836
Steap3	0.801385	0.806971	0.938721	0.99999	0.880177	0.522711	0.595597	0.568416	0.573365	0.548853	0.332473	0.352407	0.265347	0.293082	0.272085	0.412575	0.605944	0.350962	0.33379	0.293303	0.108383	0.119613	0.16331	0.232198	0.160119	0.488449	0.506006	0.537227	0.405369	0.373947	0.752667	0.883856	0.907215	0.50488	0.477378	0.599015	0.49946	0.411006	0.325549	0.354303	0.41326	0.390059	0.539853	0.58722	0.455316	0.141065	0.176738	0.332041	0.0940743
C1ql2	0.00288283	0	0.00449012	0	0.00300564	0	0	0	0	0	0.00113322	0	0	0	0	0	0	0	0	0	0	0	0	0	0	0	0	0	0	0	0	0	0	0	0	0	0	0	0	0	0	0	0	0	0.00511108	0	0	0	0
1700012E03Rik	0	0	0	0	0	0	0	0	0	0	0	0	0	0	0	0	0	0	0	0	0	0	0	0	0	0	0	0	0	0	0	0	0	0	0	0	0	0	0	0	0	0	0	0	0	0	0	0	0
Marco	0	0	0	0	0	0	0	0	0	0	0	0	0	0	0	0	0	0	0	0	0	0	0	0	0	0	0	0	0	0	0	0	0	0	0	0	0	0	0	0	0	0	0	0	0	0	0	0	0
En1	0	0.00736403	0	0	0	0	0	0	0	0	0	0	0	0	0	0	0	0	0	0	0	0	0	0	0	0	0	0	0	0	0	0	0	0	0	0	0	0	0	0	0	0	0	0	0	0	0	0	0
2610027F03Rik	0	0	0	0	0	0	0	0	0	0	0	0	0	0	0	0	0	0	0	0	0	0	0	0	0	0	0	0	0	0	0	0	0	0	0	0	0	0	0	0	0	0	0	0	0	0	0	0	0
Gm29346	0	0	0	0	0	0	0	0	0	0	0	0	0	0	0	0	0	0	0	0	0	0	0	0	0	0	0	0	0	0	0	0	0	0	0	0	0	0	0	0	0	0	0	0	0	0	0	0	0
Gm29345	0	0	0	0	0	0	0	0	0	0	0	0	0	0	0	0	0	0	0	0	0	0	0	0	0	0	0	0	0	0	0	0	0	0	0	0	0	0	0	0	0	0	0	0	0	0	0	0	0
Gm29348	0	0	0	0	0	0	0	0	0	0	0	0	0	0	0	0	0	0	0	0	0	0	0	0	0	0	0	0	0	0	0	0	0	0	0	0	0	0	0	0	0	0	0	0	0	0	0	0	0
Gm29347	0	0	0	0	0	0	0	0	0	0	0	0	0	0	0	0	0	0	0	0	0	0	0	0	0	0	0	0	0	0	0	0	0	0	0	0	0	0	0	0	0	0	0	0	0	0	0	0	0
Celrr	0	0	0	0	0	0	0	0	0	0	0.00117991	0	0	0	0	0	0	0	0	0	0	0	0	0	0.00140137	0	0	0	0	0	0	0	0	0.00214721	0.00598294	0	0	0	0	0	0	0	0	0	0	0	0	0	0
Gm29359	0	0	0	0	0	0	0	0	0	0	0	0	0	0	0	0	0	0	0	0	0	0	0	0	0	0	0	0	0	0	0	0	0	0	0	0	0	0	0	0	0	0	0	0	0	0	0	0	0
Insig2	0.262393	0.294534	0.254522	0.361096	0.48407	0.318047	0.316265	0.271079	0.289879	0.385942	0.168657	0.175454	0.252721	0.185357	0.252189	0.248111	0.2418	0.289557	0.428121	0.46854	0.231744	0.153555	0.182096	0.219101	0.294835	0.325685	0.299791	0.299337	0.442262	0.441948	0.401481	0.379073	0.321488	0.496892	0.497106	0.274922	0.289366	0.340723	0.451079	0.512291	0.397983	0.456648	0.297062	0.450108	0.459249	0.218742	0.328244	0.375965	0.311691
2210011K15Rik	0	0	0	0	0	0	0	0	0	0	0	0	0	0	0	0	0	0	0	0	0	0	0	0	0	0	0	0	0	0	0	0	0	0	0	0	0	0	0	0	0	0	0	0	0	0	0	0	0
Ccdc93	0.112446	0.157077	0.0992666	0.158042	0.107893	0.129045	0.11294	0.122295	0.127482	0.120542	0.129802	0.129756	0.11876	0.12158	0.147219	0.150875	0.147146	0.151178	0.154189	0.14276	0.121087	0.0847844	0.14803	0.162249	0.134325	0.0831496	0.134377	0.0848481	0.195533	0.119471	0.184459	0.188169	0.0979605	0.109423	0.105546	0.0911271	0.200625	0.112924	0.185075	0.115876	0.0964103	0.128141	0.11832	0.118037	0.0731385	0.132127	0.135412	0.153924	0.114298
Gm15392	0	0	0	0	0	0	0	0	0	0	0	0	0	0	0	0	0	0	0	0	0	0	0	0	0	0	0	0	0	0	0	0	0	0	0	0	0	0	0	0	0	0	0	0	0	0	0	0	0
Htr5b	0	0	0	0	0	0	0	0	0.00276982	0	0	0	0	0.00188943	0	0	0	0	0	0	0	0	0	0	0	0	0	0	0	0	0	0	0	0	0	0	0	0	0	0	0	0	0	0	0	0	0	0	0
Ddx18	0.586031	0.455571	0.453237	0.507893	0.652828	0.462344	0.379683	0.34911	0.314247	0.646865	0.608282	0.619283	0.542442	0.492173	0.707217	0.596108	0.374501	0.274001	0.384812	0.562744	0.64315	0.526733	0.510574	0.435993	0.702771	0.501626	0.486449	0.408629	0.349851	0.610248	0.56436	0.454019	0.410758	0.479307	0.550479	0.549942	0.422671	0.345136	0.246108	0.591482	0.54225	0.448307	0.413492	0.326748	0.561478	0.825205	0.509839	0.39508	0.514475
Gm28590	0	0	0	0	0	0	0	0	0	0	0	0	0	0	0	0	0	0	0	0	0	0	0	0	0	0	0	0	0	0	0	0	0	0	0	0	0	0	0	0	0	0	0	0	0	0	0	0	0
Dpp10	0	0	0	0	0	0	0	0	0	0	0	0	0	0	0	0	0	0	0	0	0	0.00245105	0	0	0	0	0	0	0	0	0	0	0	0	0	0	0	0	0	0	0	0	0	0	0	0	0.00771234	0	0
Gm28928	0	0	0	0	0	0	0	0	0	0	0	0	0	0	0	0	0	0	0	0	0	0	0	0	0	0	0	0	0	0	0	0	0	0	0	0	0	0	0	0	0	0	0	0	0	0	0	0	0
1700121L03Rik	0	0	0	0	0	0	0	0	0	0	0	0	0	0	0	0	0	0	0	0	0	0	0	0	0	0	0	0	0	0	0	0	0	0	0	0	0	0	0	0	0	0	0	0	0	0	0	0	0
Actr3	1.1422	0.766238	0.652986	0.662945	0.816255	1.88286	1.43056	1.26571	1.40679	1.22208	1.29301	0.963187	0.900989	1.09062	0.981361	1.03603	0.729672	0.7934	0.602569	0.78901	1.63062	1.18609	0.938461	0.985305	0.990878	1.20939	0.945484	0.822665	0.929517	1.02345	1.3102	0.927893	0.453787	0.734509	0.747733	1.29133	0.756729	0.739836	0.920981	0.91971	2.4307	1.72142	1.38474	1.77023	1.69912	1.20359	0.825638	0.84713	0.965616
Gm28706	0	0	0	0	0	0	0	0	0	0	0	0	0	0	0	0	0	0	0	0	0	0	0	0	0	0	0	0	0	0	0	0	0	0	0	0	0	0	0	0	0	0	0	0	0	0	0	0	0
Slc35f5	0.476979	0.230559	0.241243	0.282298	0.290159	0.284251	0.122645	0.0375251	0.128892	0.188764	0.318768	0.0959524	0.14013	0.263915	0.28742	0.349194	0.106618	0.140163	0.217247	0.316893	0.311355	0.162493	0.199594	0.260453	0.314685	0.352881	0.149915	0.238513	0.243589	0.250582	0.357517	0.181832	0.180976	0.19306	0.300648	0.316927	0.173594	0.130756	0.202653	0.19477	0.228481	0.107105	0.124458	0.0840702	0.136263	0.220124	0.119802	0.158022	0.122309
Gpr39	0	0	0	0	0	0	0	0	0	0	0	0	0.00151217	0.00205863	0	0	0	0	0	0	0.00208386	0	0.0240921	0.00972185	0.00289191	0	0	0	0	0	0	0	0	0	0	0	0	0	0	0	0	0.00330296	0	0	0	0.0152433	0.0332725	0.0349182	0.0651295
Lypd1	0	0	0	0	0	0	0	0	0	0	0	0	0	0	0	0	0	0	0	0	0	0	0	0	0.00145182	0	0.00571994	0	0.00383433	0	0	0	0	0	0.00490914	0	0	0	0	0	0	0	0	0	0.00280468	0	0	0	0.00106634
Nckap5	0.00514213	0.0125331	0.0105665	0	0.00834974	0.00751361	0	0	0.00291009	0	0.00189302	0.00162558	0.00266391	0.00454557	0	0.0066569	0	0	0.00663249	0	0	0.00179498	0	0.00393811	0	0.00222071	0	0	0	0.00130716	0	0	0	0.00924355	0.00626271	0.00496021	0	0	0	0	0.00926113	0.021499	0.00541594	0	0.000994943	0.119169	0.349611	0.696578	0.79384
4930599A14Rik	0	0	0	0	0	0	0	0	0	0	0	0	0	0	0	0	0	0.0054099	0	0	0	0	0	0	0	0	0	0	0	0	0	0	0	0	0	0	0	0	0	0	0	0	0	0	0	0	0	0	0
Mgat5	0.107234	0.0837553	0.10133	0.0407461	0.0817502	0.0969368	0.107271	0.0698746	0.0954533	0.10975	0.100318	0.0593347	0.0699873	0.0586709	0.0825775	0.0425038	0.0948546	0.0981692	0.0753533	0.0768584	0.0817659	0.0864558	0.107203	0.105594	0.115283	0.0750527	0.0759944	0.063117	0.0434551	0.0941338	0.0780227	0.244965	0.167017	0.0967484	0.101604	0.12346	0.0996099	0.0468095	0.0715519	0.0847835	0.201233	0.124668	0.163107	0.167093	0.0890401	0.0430347	0.0415904	0.101865	0.0681859
Tmem163	0	0	0	0	0	0.00568412	0	0	0	0	0	0	0	0	0	0	0	0	0	0	0	0	0	0.00489709	0.00104643	0	0	0	0	0	0	0	0	0	0	0	0	0	0.00929099	0	0	0	0	0	0	0	0	0	0.000948472
Acmsd	0	0	0	0	0	0	0	0	0	0	0.00149142	0.00222012	0	0	0	0	0	0	0	0.00401756	0	0	0	0	0	0.00219484	0	0	0.00566142	0	0	0	0	0	0	0.00317111	0	0	0.00802403	0	0	0.00519449	0	0	0	0	0	0	0
2900009J06Rik	0.0717239	0.0531386	0.0608734	0.0474976	0.0487343	0.0791966	0.0994412	0.046577	0.0470963	0.0683772	0.0676205	0.0583304	0.0475078	0.0648977	0.0497959	0.0708694	0.0495409	0.0730146	0.0631063	0.0675988	0.0472817	0.0389852	0.0419835	0.0888637	0.0726868	0.0691173	0.0584226	0.029461	0.0632347	0.0299835	0.0413439	0.0334584	0.0982915	0.0383957	0.0971037	0.0672588	0.073102	0.0846976	0.0959191	0.0520601	0.0321645	0.0342804	0.0242729	0.0434689	0.0573944	0.067672	0.0363186	0.0247192	0.0139742
Ccnt2	0.39394	0.347883	0.270195	0.346364	0.465443	0.295609	0.224172	0.260486	0.283543	0.438103	0.258759	0.207466	0.366984	0.319111	0.41953	0.302552	0.193588	0.333322	0.327361	0.425013	0.270717	0.225339	0.257046	0.319787	0.382814	0.320624	0.275308	0.235492	0.320299	0.336781	0.540596	0.462902	0.715024	0.72511	0.705967	0.333016	0.216416	0.223049	0.262078	0.403075	0.329775	0.313518	0.225446	0.259301	0.341374	0.273165	0.401699	0.386604	0.475158
Map3k19	0	0.00398008	0.00422055	0	0	0.00337749	0.00474115	0.0106769	0.00145226	0.00309307	0	0	0	0	0	0	0	0	0	0	0	0	0	0	0	0.00223897	0	0	0	0	0	0	0	0	0	0	0.00560723	0	0.00600185	0	0.0072486	0	0	0	0	0	0	0	0
Rab3gap1	0.4134	0.487389	0.438969	0.352616	0.461002	0.382483	0.426865	0.367479	0.301434	0.311583	0.331184	0.354699	0.34834	0.345968	0.329255	0.368296	0.410264	0.41726	0.386324	0.325888	0.313251	0.301723	0.409975	0.328723	0.346051	0.376776	0.452209	0.35251	0.307943	0.357304	0.382311	0.415394	0.335046	0.423737	0.333337	0.413619	0.378483	0.374073	0.344197	0.436569	0.465493	0.381717	0.421962	0.27287	0.301932	0.405668	0.448015	0.477552	0.384862
Zranb3	0.0356194	0.040837	0.0223874	0.0444728	0.0309872	0.0247581	0.0162489	0.0443402	0.0774909	0.031871	0.0216918	0.0161237	0.010568	0.0234638	0.0140891	0.0234781	0.0220298	0.0183158	0.0364754	0.0378444	0.0255918	0.0160416	0.0222755	0.0361738	0.0325242	0.0283665	0.0216513	0.010502	0.0291027	0.0406695	0.0411079	0.026072	0.00778525	0.0120781	0.018048	0.0405775	0.0284433	0.0396173	0.0554063	0.0393271	0.0401386	0.0261069	0.0271083	0.0421841	0.0131402	0.0259768	0.00434957	0.0441763	0.0664667
Gm28800	0.00167023	0	0	0.00693836	0	0	0.0045451	0	0	0.00083832	0.00219165	0	0	0	0	0	0	0	0	0	0.00569552	0	0.0019259	0	0	0	0	0	0	0	0	0	0	0	0	0	0	0	0	0.00200505	0	0.0118019	0.00765111	0	0.00649662	0	0	0.00663623	0.00454251
R3hdm1	0.858713	0.807444	0.732591	1.03966	0.68762	0.938998	0.893573	0.787056	0.832694	0.840686	0.850051	0.56747	0.757235	0.860303	0.851502	0.768088	0.618214	0.823524	0.948043	0.874688	0.787002	0.599116	0.632467	0.857412	0.69028	0.855893	0.635591	0.464499	0.714285	0.693715	1.30423	1.01769	1.08425	0.944663	0.98284	0.908329	0.630137	0.809148	0.698518	0.755228	0.966722	0.799148	0.668511	0.901589	0.675734	0.905406	0.927892	1.05945	1.15913
Ubxn4	1.37804	1.75681	1.59357	1.13306	1.50125	1.21342	1.53528	1.27844	1.13899	1.20475	1.25389	1.37553	1.49999	1.26833	1.44549	1.22731	1.39674	1.16658	1.17421	1.25418	1.10754	1.33611	1.54183	1.2039	1.39944	1.44737	1.45312	1.29051	1.02748	1.43409	1.64208	1.61417	1.50598	1.10687	1.44226	1.33922	1.66902	1.46717	1.10823	1.52751	1.5786	1.60469	1.35457	1.06001	1.02849	1.8438	1.82549	1.53066	1.45169
Lct	0	0	0	0	0	0.00282928	0	0	0	0	0.00176264	0	0.00300371	0	0	0.00324174	0	0	0	0	0	0.00190381	0	0	0	0	0.00381686	0	0	0	0	0	0.00593137	0	0.00512425	0	0	0	0	0	0	0	0	0	0	0	0	0	0.000533048
Mcm6	0.300823	0.234106	0.234314	0.172762	0.219531	0.216295	0.151982	0.172593	0.113661	0.127513	0.338844	0.240101	0.267976	0.215467	0.210818	0.182858	0.0876004	0.155818	0.172676	0.148465	0.210557	0.235423	0.269152	0.176268	0.203454	0.375749	0.245697	0.203346	0.230006	0.214555	0.290555	0.246322	0.12197	0.144178	0.154587	0.258662	0.19043	0.228619	0.150862	0.133136	0.315981	0.274405	0.259042	0.151641	0.152268	0.375881	0.458966	0.345229	0.182185
Dars	0.518883	0.380696	0.257494	0.340666	0.461755	0.419741	0.270583	0.27657	0.373174	0.47848	0.635396	0.358067	0.342973	0.476371	0.473229	0.517647	0.285351	0.20449	0.3109	0.414921	0.688842	0.368397	0.325422	0.451624	0.469735	0.528059	0.289619	0.205842	0.484907	0.50675	0.489183	0.467886	0.330793	0.51076	0.426056	0.512272	0.359374	0.288048	0.356244	0.510242	0.568414	0.285997	0.312505	0.613463	0.448577	0.865132	0.490086	0.408805	0.593112
Cxcr4	0	0	0	0	0	0.0014438	0	0	0	0	0	0	0	0.00205558	0	0.00478872	0	0	0	0	0	0	0.00300455	0.00641101	0	0	0	0	0	0.00261432	0	0	0	0	0	0	0.00493294	0	0	0	0.017257	0	0	0.00302312	0.0059071	0.0636893	0.00839832	0.0156487	0.036534
Gm26686	0	0	0	0	0	0	0	0	0	0	0	0	0	0	0	0	0	0	0	0	0	0	0	0	0	0	0	0	0	0	0	0	0	0	0	0	0	0	0	0	0	0	0	0	0	0	0	0	0
Thsd7b	0.0595938	0.050896	0.058051	0.0773324	0.0258797	0.0430884	0.0305508	0.024049	0.00655772	0.007283	0.00522666	0.0053227	0.00142038	0.00257891	0.00138786	0.0252288	0.00768875	0.00589328	0	0	0	0	0	0	0	0.0951416	0.0195414	0.0671757	0.0249853	0.0174502	0.0605799	0.00810192	0.0210779	0	0.0241219	0.0222902	0.0173324	0.0447315	0	0.00616962	0.0444364	0.0629942	0.0693227	0.0265823	0.0095233	0	0	0	0.000379551
Gm16081	0	0	0	0	0	0	0	0	0	0	0	0	0	0	0	0	0.0106806	0	0	0	0	0	0	0	0	0	0	0	0	0	0	0	0	0	0	0	0	0	0	0	0	0	0	0	0	0	0	0	0
Cd55b	0.00163333	0	0	0	0	0	0	0	0	0	0	0	0	0	0	0	0	0	0	0	0	0	0	0.00181657	0	0	0	0.00668186	0	0	0	0	0	0	0	0	0	0	0	0	0.00163302	0	0	0	0	0	0	0	0
Gm15674	0	0	0	0	0	0	0	0	0	0	0	0	0	0	0	0	0	0	0.00378871	0	0	0.00200721	0	0	0	0	0	0.00532745	0	0	0	0	0	0	0.0017267	0	0	0	0	0	0	0	0	0	0	0	0	0	0
Gm15675	0.0123746	0.0150286	0.0331581	0.0292489	0.00487792	0.0114162	0.00597464	0.00634415	0.0022877	0	0.00851123	0.0015907	0.00719358	0.00293945	0.00337581	0.0300929	0	0	0.00612409	0.00253122	0.00514081	0.00200721	0.00324189	0.00659347	0.005841	0.0482386	0.0279399	0.0224632	0.00269831	0.00738184	0.0178369	0	0.00854806	0.00493687	0.0109214	0.0425084	0.01639	0.0191734	0	0.00976684	0.00577751	0.0203974	0	0	0	0	0	0	0.00383085
Cd55	0.335038	0.315278	0.362046	0.483453	0.564622	0.269729	0.139666	0.0943988	0.0757957	0.0885195	0.0821472	0.0374414	0.012763	0.0505041	0.0498839	0.178347	0.142825	0.0459564	0.139645	0.0901707	0.0472113	0.0166983	0.00364498	0.0493714	0.0534925	0.680667	0.237789	0.231048	0.210014	0.220729	0.490548	0.229737	0.250178	0.321254	0.258188	0.238695	0.165875	0.0671051	0.139358	0.184803	0.2595	0.143	0.146002	0.155632	0.135161	0.0743322	0.0535072	0.0459139	0.2139
Gm16083	0.00186613	0.00363427	0	0	0.00314187	0.00289147	0	0	0	0.00207032	0.00199249	0	0	0	0	0.00298565	0	0	0.00468489	0	0	0	0	0.00221225	0	0.00359692	0.00606353	0.00508258	0	0	0	0	0.0072489	0	0.000848325	0.0032494	0	0	0	0	0	0	0	0.00739176	0.00497378	0	0.00775504	0	0
Zp3r	0	0	0	0	0	0	0	0	0	0	0	0	0	0	0	0	0	0	0	0	0	0	0	0	0	0	0	0	0	0	0	0	0	0	0	0	0	0	0	0	0	0	0	0	0	0	0	0	0
C4bp	0.00144818	0	0	0	0	0	0	0	0	0	0	0	0	0	0	0	0	0	0	0	0	0	0	0	0	0.00116337	0	0	0	0	0	0	0	0	0	0	0	0	0	0	0	0	0	0	0	0	0	0	0
Gm29427	0.00084702	0	0	0	0	0	0	0	0	0	0	0	0	0	0	0.00534433	0	0	0	0	0	0	0	0	0.000796536	0	0	0	0	0	0	0	0	0	0	0	0	0.00434531	0	0	0	0	0	0	0	0	0	0	0
Pfkfb2	0.027245	0	0.0125628	0.0276705	0.013518	0.0164903	0.0134045	0.018866	0.0058282	0.0238765	0.0252938	0.0107339	0	0.0237375	0.0192532	0.0212129	0.0244225	0.0230679	0.028338	0.0157028	0.0284528	0.00484097	0.00721578	0.023957	0.0201411	0.0352418	0.0137727	0.0209503	0.0224048	0.0175004	0.0358242	0.0352362	0.0437781	0.0370046	0.028104	0.0289936	0.0131371	0	0.0496854	0.0140234	0.0244079	0.0031652	0.00639621	0	0.00386472	0.0451453	0.0141649	0.0125891	0.0518059
Yod1	0.186966	0.114154	0.204413	0.21725	0.195612	0.250465	0.148404	0.172493	0.219312	0.179619	0.161767	0.117814	0.105431	0.192691	0.14424	0.176137	0.14418	0.128512	0.231568	0.148181	0.172904	0.105206	0.0898924	0.17205	0.102688	0.224654	0.178807	0.176147	0.287396	0.143024	0.261542	0.0986566	0.0926926	0.167005	0.227734	0.245552	0.132204	0.131104	0.284736	0.174976	0.173858	0.22305	0.115818	0.17562	0.137356	0.19516	0.107746	0.18577	0.18486
AA986860	0	0.0123701	0.0169921	0.022447	0.015133	0.0208637	0	0.0225678	0.00934828	0.00293653	0.0018415	0.0164773	0.0269448	0.00480998	0.0175177	0.0058732	0.00858341	0.0189176	0.0133554	0.0244473	0.00788283	0.0101772	0.0124154	0.00839431	0.00196045	0.0244997	0.00380538	0.0152096	0.00188592	0.030226	0.0151097	0	0.0161201	0.0160496	0.00942777	0.00655108	0.00320353	0.0207454	0.0323092	0.00538798	0.00801775	0.0111552	0.0102182	0.00476771	0.00928232	0.0119878	0.00380191	0.0116532	0.0113384
Gm28857	0	0	0	0	0	0	0	0	0	0	0	0	0	0	0.00130647	0	0	0	0	0	0	0	0	0	0	0	0	0	0	0	0	0	0	0	0	0	0	0	0	0	0	0	0	0	0	0	0	0	0
Gm28856	0	0	0	0	0	0	0	0	0	0	0.00350223	0	0	0	0	0	0	0	0	0	0.00217122	0	0	0	0	0	0	0	0	0	0	0	0	0	0	0.00296547	0	0	0.00472758	0	0	0	0	0	0	0	0	0	0
Fcamr	0	0	0	0	0	0	0	0	0	0	0	0	0	0	0	0	0	0	0	0	0	0	0	0	0	0	0	0	0	0	0	0	0	0	0	0	0	0	0	0	0	0	0	0	0	0	0	0	0
Gm15848	0	0	0	0	0	0	0	0	0	0	0	0	0	0	0	0	0	0	0	0	0	0	0	0	0	0	0	0	0	0	0	0	0	0	0	0	0	0	0	0	0	0	0	0	0	0	0	0	0
Pigr	0	0	0	0	0	0	0	0	0	0	0	0	0	0	0	0	0	0	0	0	0	0	0	0	0	0	0	0	0	0	0	0	0	0.00877544	0	0	0	0	0	0	0	0	0	0	0	0	0	0.0303752	0.00473518
Fcmr	0	0	0	0	0	0	0	0	0	0	0	0	0	0	0	0	0	0	0	0	0	0	0	0	0	0	0	0	0	0	0	0	0	0	0	0	0	0	0	0	0	0	0	0	0	0	0	0	0
Il24	0	0.00343289	0	0	0	0	0	0	0	0	0	0.00914177	0	0	0	0	0	0	0	0	0	0	0	0	0	0.00141694	0	0	0	0	0	0	0	0	0	0	0	0	0	0	0.00482053	0.0089879	0	0	0	0	0	0	0
Il20	0	0	0	0	0	0	0	0	0	0	0	0	0	0	0	0	0	0	0	0	0	0	0	0	0	0	0	0	0	0	0	0	0	0	0	0	0	0	0	0	0	0	0	0	0	0	0	0	0
Il19	0	0	0	0	0	0	0	0.00191953	0	0	0	0	0	0	0	0	0	0.00502941	0	0.00371802	0	0	0	0	0	0	0	0	0	0	0.00847274	0	0	0	0	0	0	0	0	0	0	0	0	0	0	0	0	0	0
Il10	0.00381416	0	0	0	0	0	0	0	0	0	0	0	0	0.00190701	0	0	0	0	0	0	0	0	0.0131097	0.0563134	0.000861743	0.00767066	0	0	0	0	0	0	0	0.010498	0	0	0	0	0.0181514	0	0	0	0	0	0	0	0	0	0
Mapkapk2	0.611326	0.614073	0.567727	0.453283	0.530522	0.631959	0.647656	0.685671	0.499882	0.436789	0.565146	0.517729	0.686815	0.505148	0.432206	0.499771	0.403514	0.391221	0.349794	0.372659	0.578618	0.681146	0.723407	0.465313	0.598454	0.613038	0.631657	0.534565	0.374228	0.52635	0.483246	0.505864	0.414951	0.293288	0.366522	0.54216	0.521372	0.495865	0.470815	0.374252	0.646343	0.747295	0.788507	0.577092	0.565032	0.72692	0.552708	0.760902	0.640509
Dyrk3	0.0110132	0.00924573	0.0144005	0	0.0121898	0.00468593	0.00617073	0.00746431	0.00532604	0.00242941	0.011645	0.00701428	0.00909822	0.00904006	0.00890779	0.00722305	0.00546009	0.00385009	0.00339785	0	0.011721	0.00252213	0.00602688	0.00655207	0.00634381	0.00219651	0.00371853	0	0.00905433	0.00304932	0.0288271	0.00904159	0.00606537	0.00223765	0.0153848	0.00405524	0	0.0111698	0	0.00276269	0.00517941	0.00797469	0	0	0.00872322	0.010692	0.00922739	0	0.00335555
Eif2d	0.135834	0.15897	0.112094	0.0816067	0.122937	0.131192	0.137209	0.119079	0.191834	0.180402	0.146773	0.104266	0.137731	0.177436	0.174291	0.13785	0.121089	0.12706	0.13993	0.12974	0.126803	0.0822484	0.12635	0.140074	0.151998	0.116417	0.127012	0.0925058	0.171591	0.16237	0.176083	0.121886	0.135909	0.132804	0.188573	0.124002	0.0883743	0.150654	0.117986	0.18448	0.210338	0.121549	0.159752	0.234034	0.194074	0.19419	0.218807	0.161246	0.188454
Rassf5	0.0224357	0.0432696	0.0450152	0.0320497	0.0375484	0.148864	0.146799	0.166608	0.180816	0.120949	0.254424	0.390072	0.424915	0.381907	0.362108	0.154206	0.18453	0.195153	0.0907346	0.125959	0.346613	0.481773	0.30847	0.310895	0.412202	0.0851224	0.0502076	0.0888213	0.0960744	0.0843264	0.0861953	0.126009	0.0806032	0.0867969	0.0835814	0.0719018	0.191592	0.246789	0.110143	0.111498	0.0915455	0.0916231	0.137919	0.135707	0.204624	0.0896728	0.216678	0.224604	0.0721925
Ikbke	0.0216254	0.00872608	0.043745	0.0363831	0.0398246	0.0233098	0.0107382	0.0257999	0.0345237	0.0172063	0.0221189	0.0165884	0.039101	0.0187024	0.0283067	0.0337609	0.017321	0.0174099	0.0178142	0.0221617	0.0209128	0.0189463	0.0353354	0.0319865	0.0407384	0.00918562	0.0511532	0.0317464	0.048909	0.0273679	0.0451774	0.0284014	0.0250824	0.0320395	0.0372338	0.0265278	0.0367872	0.0315823	0.0335741	0.0495965	0.0313853	0.0088406	0.0266426	0.0380901	0.0215338	0.011567	0.0141231	0.0102602	0.0379434
Gm28914	0	0	0	0	0	0	0	0	0	0	0	0	0	0	0	0	0	0	0	0	0	0	0.00393008	0	0	0	0	0	0	0	0	0	0	0	0	0	0	0	0	0	0	0	0	0	0	0	0	0	0
Gm28913	0.00209217	0.00393461	0	0	0	0.00311162	0	0	0	0.00629987	0.00487432	0.00663093	0.00204235	0.00211703	0.00290096	0	0	0	0	0	0	0	0.00438451	0	0.00157716	0	0	0.0182701	0.00768191	0	0	0	0	0	0.00148949	0.00515762	0	0.0127435	0	0	0	0.00785786	0	0.00376244	0.00304291	0	0	0.00784227	0.00228882
Srgap2	0.218373	0.218847	0.210567	0.276806	0.189004	0.325169	0.356543	0.360949	0.356802	0.254001	0.189154	0.223264	0.279661	0.282983	0.205691	0.246427	0.242506	0.277319	0.314617	0.24572	0.199093	0.199558	0.342581	0.313091	0.26276	0.24372	0.198803	0.256192	0.329139	0.199359	0.303431	0.385935	0.391764	0.413491	0.287505	0.252222	0.240924	0.267988	0.298934	0.1762	0.357246	0.463824	0.361848	0.310559	0.265637	0.159329	0.159069	0.202073	0.0870321
Fam72a	0.0113561	0	0	0	0.0133086	0.0329541	0.00555331	0.018205	0.0592668	0.0212075	0.0307982	0.0194438	0.00430771	0.0112713	0.00596615	0.0175816	0.00554198	0	0	0.017063	0.015944	0.0105162	0.00421505	0.0214172	0.0133663	0.0215147	0.0139868	0	0.00985622	0.00554196	0.00922853	0	0	0.00838245	0.0220581	0.0105804	0	0	0.0236815	0.0414349	0.032106	0.00413878	0.0135187	0.0124196	0.0632279	0.0271779	0.00824704	0.0123537	0.0101355
Avpr1b	0	0	0	0	0	0	0	0	0	0	0	0	0	0	0	0	0	0	0	0	0	0	0	0	0	0	0	0	0	0	0	0	0	0	0	0	0	0	0	0	0	0	0	0	0	0	0	0	0
Ctse	0	0	0	0	0	0	0	0	0	0	0	0	0	0	0	0	0	0	0	0	0	0	0	0	0	0	0	0	0	0	0	0	0	0	0	0	0	0	0	0	0	0	0	0	0	0	0	0	0
Rab7b	0.0704318	0.169681	0.114376	0.173688	0.147221	0.0778955	0.151582	0.0694511	0.135261	0.1409	0.0793994	0.0802075	0.175405	0.096827	0.126804	0.132766	0.26265	0.232551	0.151432	0.24345	0.0552889	0.0640943	0.0849749	0.0788135	0.119403	0.155622	0.252522	0.331336	0.204152	0.25004	0.117979	0.186137	0.207465	0.21031	0.246771	0.0488933	0.0498296	0.11739	0.131137	0.150321	0.0976998	0.112912	0.148517	0.161613	0.136985	0	0	0.00356247	0.00627495
Slc26a9	0	0	0	0	0	0	0	0	0	0	0	0	0	0	0	0	0	0	0	0	0	0	0	0	0	0	0	0	0	0	0	0	0	0	0	0	0	0	0	0	0	0	0	0	0	0	0	0	0
Pm20d1	0.00181796	0.0129954	0.00476308	0	0.00387707	0.0123627	0.00504984	0.0056273	0.0175938	0.00113243	0.00375207	0.00169271	0.0262198	0.0111081	0.00554364	0.00890848	0.0133969	0.009826	0.00601532	0.00219523	0.00949291	0.00553888	0.00309983	0.0111106	0.00120219	0	0.0369614	0.00665347	0.00499735	0.0100703	0.0227704	0.0436881	0.00638589	0	0.00168393	0.00420271	0	0.00655701	0	0	0	0.0168378	0	0.00264173	0.00280468	0.02195	0.00324592	0.0234466	0.0221034
Slc41a1	0.226765	0.328597	0.309103	0.390017	0.222085	0.199479	0.314482	0.28868	0.390122	0.257087	0.166426	0.21015	0.280183	0.322768	0.215204	0.28265	0.298714	0.369559	0.428204	0.295452	0.215165	0.228876	0.311202	0.433267	0.316223	0.283078	0.261983	0.354538	0.336632	0.236645	0.27486	0.348655	0.263222	0.229262	0.230347	0.206401	0.313722	0.257078	0.366695	0.27596	0.195385	0.355761	0.286919	0.300446	0.283587	0.282296	0.517739	0.689418	0.685479
Rab29	0.0275628	0.0423044	0.0290506	0.0399072	0.0598886	0.0375184	0.0424229	0.0565228	0.0498059	0.0463575	0.0277963	0.0152083	0.0434228	0.028138	0.0553068	0.0336842	0.0361512	0.00979862	0.0318804	0.0416406	0.025729	0.0102009	0.0423565	0.0197785	0.0300748	0.0457163	0.0181558	0.0619938	0.0189494	0.045545	0.0900936	0.0794711	0.0257291	0.063729	0.0523953	0.020554	0.00581575	0.016679	0.0136302	0.0244028	0.0436193	0.0959736	0.076588	0.0922097	0.124778	0.0198853	0.0528468	0.0683725	0.0343562
Nucks1	1.45209	1.63231	1.23098	1.04408	1.58752	1.17539	1.18528	0.815357	1.00771	1.24023	1.5968	1.50648	1.28115	1.60829	1.53556	1.28504	1.09029	0.761219	1.27473	1.15552	1.77187	2.01642	1.46301	1.4352	1.63581	1.41967	1.42123	1.16488	1.71817	1.50553	1.68171	1.98852	1.39775	1.69128	1.42195	1.35534	1.24623	0.938995	1.06781	1.28527	1.49981	1.60182	0.958158	1.31362	1.19033	1.88582	1.49763	1.26341	1.65306
Slc45a3	0.00600923	0.00196684	0.00365873	0.0235475	0.00527493	0.00163113	0.00317201	0.00866831	0.00533483	0.0114744	0.0132711	0.00697467	0.014472	0.0132344	0.00967489	0.0176815	0.0107426	0.0231211	0.0268787	0.020404	0.0131001	0.00181064	0	0.0142703	0.0139956	0.0102596	0.0173129	0.0166208	0.0244652	0.0181843	0.00955891	0.00691886	0	0.0134644	0.0198669	0.00310981	0.00271155	0.0146366	0.00622156	0.016919	0.00544791	0	0.00857927	0	0	0.83233	0.258743	0.771573	2.33098
Elk4	0.375926	0.242323	0.198076	0.41664	0.349786	0.329383	0.1443	0.180403	0.31154	0.221583	0.381603	0.181146	0.186815	0.393595	0.327898	0.369956	0.198286	0.216015	0.348086	0.289338	0.389573	0.230391	0.255552	0.398413	0.416636	0.42486	0.219708	0.157128	0.301606	0.325039	0.352825	0.219836	0.165676	0.374795	0.321853	0.458932	0.246862	0.201104	0.506376	0.343808	0.228286	0.159009	0.128315	0.22387	0.219878	0.391576	0.177429	0.168228	0.326379
Mfsd4a	0.110415	0.0765416	0.0621086	0.0997329	0.146666	0.123708	0.0828104	0.0836351	0.136438	0.0927273	0.0896973	0.0830497	0.0707551	0.148902	0.0994313	0.090304	0.0937655	0.0886563	0.195803	0.194559	0.0854544	0.10166	0.0819858	0.161071	0.143639	0.0880183	0.0625225	0.0727564	0.147829	0.124415	0.14027	0.0723987	0.0521441	0.160701	0.176309	0.108728	0.0722543	0.0423402	0.166556	0.15608	0.0537614	0.0894186	0.0598033	0.0911493	0.0693862	0.0373889	0.130852	0.101062	0.154131
Gm26892	0.00182385	0	0	0	0	0	0	0	0.00347816	0	0	0	0.000934448	0	0	0	0	0	0	0.00278379	0	0	0	0	0.00374187	0.00192348	0	0	0.00477938	0	0	0	0	0	0	0.00184461	0	0.00379391	0	0	0	0	0	0	0	0	0	0	0.00159074
Cdk18	0	0	0	0	0.00516532	0.0024135	0	0	0	0	0	0.00339413	0	0.00300643	0.0018696	0	0	0	0	0	0	0.00571774	0	0	0	0	0	0	0.00768191	0	0	0	0	0	0	0	0	0	0	0	0	0	0	0	0	0.152245	0.194185	0.145601	0.340026
Gm29629	0	0	0	0	0	0	0	0	0	0	0	0	0	0	0	0	0	0	0	0	0	0	0	0	0	0	0	0	0	0	0	0	0	0	0	0	0	0	0	0	0	0	0	0	0	0	0	0	0
Lemd1	0	0	0	0	0	0	0	0	0	0	0	0	0	0	0	0	0	0	0	0	0.00203302	0	0	0	0	0	0	0	0	0	0	0	0	0	0	0	0	0	0	0	0	0	0	0	0	0	0	0	0.00117609
1700037F24Rik	0	0	0	0	0	0	0	0	0	0	0	0	0	0	0	0	0	0	0	0	0	0	0	0	0	0	0	0	0	0	0	0	0	0	0	0	0	0	0	0	0	0	0	0	0	0	0	0	0
Gm10188	0	0	0	0	0	0	0	0	0	0	0	0	0	0	0	0	0	0	0	0	0	0	0	0	0	0	0	0	0	0	0	0	0	0	0	0	0	0	0	0	0	0	0	0	0	0	0	0	0
Gm29630	0	0	0	0	0	0	0	0	0	0	0	0	0	0	0	0	0	0	0	0	0	0	0	0	0	0	0	0	0	0	0	0	0	0	0	0	0	0	0	0	0	0	0	0	0	0	0	0	0
Klhdc8a	0	0	0	0	0.00314936	0	0	0	0	0	0	0	0	0	0	0	0	0	0.00496736	0	0	0	0	0	0	0	0	0	0	0	0	0	0	0	0	0	0	0	0	0	0	0	0	0	0	0.0166624	0.0250513	0.00947514	0.16248
Nuak2	0.00635221	0.00143708	0	0.00637163	0	0.00799472	0.0164685	0.00805992	0.00422096	0	0.00714049	0.00987027	0.00611729	0.00468363	0.00627504	0.0157895	0	0.0140037	0	0.00111276	0.00489862	0.00761275	0.0216436	0.00668095	0.0163801	0.00188791	0.00409333	0.0037622	0	0	0	0	0	0	0	0	0	0	0	0	0	0	0	0.00314637	0	0	0.0104201	0	0
F730311O21Rik	0	0	0	0	0	0	0	0	0	0	0	0	0	0	0	0	0	0	0	0	0	0	0	0	0	0	0	0	0	0	0	0	0	0	0	0	0	0	0	0	0	0	0	0	0	0	0	0	0
Tmcc2	0.0784625	0.106404	0.0872521	0.0463447	0.10109	0.0724998	0.0944122	0.0713463	0.0596002	0.0801677	0.052963	0.0510745	0.044223	0.0644467	0.0808211	0.0729878	0.0926949	0.0667156	0.055535	0.0609296	0.0826574	0.0516003	0.0228506	0.027027	0.0553308	0.056508	0.0701285	0.0807269	0.0912819	0.0450502	0.0240681	0.0156886	0.0736793	0.0366852	0.0681267	0.0759856	0.0570075	0.0768777	0.0648006	0.0755323	0.0690128	0.0828504	0.0575385	0.0491751	0.0874615	0.020235	0.00885496	0.0142111	0.00181761
Gm15849	0	0	0	0	0	0	0	0	0	0	0	0	0	0	0	0	0	0	0	0	0	0	0	0	0	0	0	0	0	0	0	0	0	0	0	0	0	0	0	0	0	0	0	0	0	0	0	0	0
Dstyk	0.300729	0.353777	0.427791	0.331765	0.324431	0.292873	0.314101	0.287096	0.299632	0.279008	0.178434	0.206615	0.234701	0.234705	0.26971	0.228432	0.371762	0.337753	0.333533	0.357657	0.217423	0.20985	0.277922	0.26195	0.282402	0.249994	0.272758	0.323006	0.278559	0.323197	0.301113	0.306354	0.385735	0.383534	0.290826	0.246427	0.272132	0.301555	0.300595	0.285935	0.24252	0.296987	0.206063	0.219115	0.234532	0.242682	0.271169	0.376285	0.19227
Rbbp5	0.0721857	0.0883272	0.0734714	0.112548	0.154142	0.0582876	0.0543256	0.0553392	0.0630984	0.0822162	0.0538807	0.0431542	0.044581	0.0446823	0.0796099	0.0654745	0.0883358	0.0663864	0.105446	0.0935609	0.0867704	0.0531141	0.0811742	0.0684611	0.108433	0.0436165	0.0544963	0.096881	0.0979355	0.109463	0.112899	0.109043	0.0889529	0.128479	0.12129	0.0519106	0.0438949	0.0903385	0.0533528	0.108782	0.111119	0.071251	0.0937209	0.0436432	0.0591897	0.050431	0.0597691	0.100416	0.0920007
Tmem81	0.0036416	0.00365175	0	0.00830271	0.0219591	0	0.00405227	0.00754022	0.00371051	0.0037845	0.00358866	0	0.00581397	0.00356837	0.00314487	0.0197612	0.0217351	0.00264415	0.012686	0.00810458	0.00430867	0.00210769	0.005143	0.00836183	0.00215103	0	0	0.00376629	0.00637544	0.00351853	0	0.0109364	0	0.00838245	0.00486378	0	0.00534368	0.020425	0	0.0059101	0.0135585	0.00497064	0.00441112	0.00310634	0	0.0126278	0	0.0127943	0.00874415
Cntn2	0	0.00497404	0	0	0.00268295	0.00281816	0	0.00335002	0	0	0	0.0013811	0	0	0	0	0	0.00971319	0	0.00583745	0.00235256	0	0	0.00477816	0	0.00192768	0.00414643	0	0.00469417	0	0	0	0	0	0.00350891	0	0.0147361	0	0	0	0	0	0	0	0	0	0	0	0.00180004
Nfasc	0.0048834	0.00585831	0	0	0	0	0	0	0	0.000533409	0	0	0	0	0	0	0	0.0103791	0	0	0	0	0	0	0	0	0	0	0	0	0	0	0	0	0	0.00206821	0	0	0	0	0	0	0	0	0	0	0	0	0
Gm10538	0	0	0	0	0	0	0	0	0	0	0	0	0	0	0	0	0	0	0	0	0	0	0	0	0	0	0	0	0	0	0	0	0	0	0	0	0	0	0	0	0	0	0	0	0	0	0	0	0
Lrrn2	0.0244064	0.0304765	0.0378716	0.0899658	0.056621	0.196978	0.0566883	0.0830162	0.0819005	0.073945	0.0647144	0.014128	0.00914596	0.0124699	0.0050568	0.0703143	0.028196	0.0144966	0	0.00606754	0.0711912	0.0164129	0.0242493	0.0202279	0.0133183	0.0538727	0.0204809	0.02711	0.0259096	0.0479641	0.0387769	0.0210084	0.0163476	0.0154379	0.0323237	0.03854	0.026086	0.00841538	0.00528782	0.00694783	0.431748	0.18062	0.0733957	0.202485	0.122354	0.0243308	0	0	0.0571243
Mdm4	0.502663	0.65001	0.689613	0.699846	0.492795	0.458513	0.621471	0.577829	0.525043	0.433214	0.521559	0.511884	0.548859	0.495733	0.412136	0.588541	0.647188	0.669838	0.811722	0.530456	0.462449	0.479887	0.56095	0.552197	0.442081	0.459607	0.559035	0.578911	0.595936	0.429535	0.816755	0.705467	0.56998	0.882584	0.609564	0.447403	0.531772	0.636893	0.543562	0.37299	0.38643	0.557474	0.456838	0.406309	0.407587	0.261106	0.715298	0.591719	0.630774
Pik3c2b	0.020671	0.0354322	0.0210805	0.022654	0.0214205	0.0464735	0.0707368	0.0807629	0.0544452	0.0545427	0.0310706	0.0355637	0.0479052	0.0364271	0.0230588	0.0196383	0.0839987	0.0305557	0.00666463	0.0135507	0.0248781	0.0629389	0.0234008	0.0217574	0.00873717	0.022414	0.0204683	0.0360234	0.023823	0.0209172	0.0218723	0.0157712	0.0203409	0.00334169	0.0256388	0.0380416	0.0293355	0.0281431	0.0486215	0.0221171	0.102788	0.10777	0.0827809	0.140228	0.0641496	0.00551438	0	0.00660939	0.00962408
Gm28609	0	0	0	0	0	0	0	0	0	0	0	0	0	0	0	0	0	0	0	0	0	0	0	0	0	0	0	0	0	0	0	0	0	0	0	0	0	0	0	0	0	0	0	0	0	0	0	0	0
Ppp1r15b	0.475595	0.495871	0.293504	0.422676	0.310897	0.572792	0.474995	0.326064	0.392056	0.261455	0.462141	0.340092	0.32098	0.360317	0.261268	0.500181	0.377821	0.295602	0.392351	0.271456	0.364666	0.326869	0.260827	0.385425	0.271514	0.426358	0.387883	0.270951	0.320646	0.331736	0.340251	0.176961	0.132039	0.258517	0.240454	0.526316	0.555097	0.405706	0.472124	0.362312	0.395152	0.269101	0.276768	0.269703	0.237767	0.241284	0.272368	0.316268	0.244399
Plekha6	0.305953	0.314485	0.347451	0.359718	0.282902	0.0169524	0.024439	0.00787742	0.00259364	0.0018074	0.02527	0.0213798	0.00926983	0.0369314	0.0291483	0.0471079	0.0312759	0.0303305	0.00560819	0.011795	0.0203697	0.0443852	0.0672161	0.0382198	0.0400868	0.134036	0.0960276	0.0864256	0.104745	0.0533694	0.122959	0.0829638	0.183686	0.0595981	0.136596	0.0653017	0.0689555	0.0261255	0.0206744	0.0576042	0.0162055	0.00794944	0	0	0	0.0330178	0.0164085	0.0123815	0.00871872
Gm19461	0.0896956	0.0631798	0.0826925	0.087603	0.127932	0.00214061	0.002634	0.00432395	0	0	0.0178137	0.0159137	0.016251	0.01991	0.0118054	0.00426207	0.008457	0	0	0.00366818	0	0.0113164	0.00562177	0.00378801	0.00770103	0	0.0091679	0.0141858	0.0208267	0.00791349	0.121236	0.0300629	0.0150241	0.0144533	0.0373369	0.0180931	0.00872944	0.00568754	0.00541063	0.0134465	0	0	0	0	0.000941387	0.0307585	0	0	0.00451551
Golt1a	0.0036943	0	0.00850292	0	0	0	0	0	0	0	0	0	0	0	0	0	0	0	0	0	0	0	0	0	0	0	0	0	0	0	0	0	0	0.00375533	0	0	0	0	0	0	0	0	0	0	0	0	0	0	0
Kiss1	0	0	0	0	0	0	0	0	0	0	0	0	0	0	0	0	0	0	0	0	0	0	0	0	0	0	0	0	0	0	0	0	0	0	0	0	0	0	0	0	0	0	0	0	0	0	0	0	0
Gm28040	0	0	0	0	0	0	0	0	0	0	0	0	0	0	0	0	0	0	0	0	0	0	0	0	0	0	0	0	0	0	0	0	0	0	0	0	0	0	0	0	0	0	0	0	0	0	0	0	0
Kiss1.1	0	0	0	0	0	0	0	0	0	0	0	0	0	0	0	0	0	0	0	0	0	0	0	0	0	0	0	0	0	0	0	0	0	0	0	0	0	0	0	0	0	0	0	0	0	0	0	0	0
Ren1	0.00598288	0	0	0	0.00304328	0.00401821	0	0	0	0	0.0357734	0.00733043	0.00373067	0.0121727	0.0129524	0.00186498	0	0	0	0	0.0448361	0.010979	0.0391908	0.00751682	0.0021318	0	0	0	0	0	0	0	0	0	0	0.0258753	0	0	0	0	0.0292181	0.019025	0.0210759	0	0	2.67774	0.877452	0.0557485	0.0364666
Etnk2	0.206964	0.199635	0.145688	0.0541646	0.176032	0.0359954	0.027941	0.0296043	0.00140476	0.0159443	0.0845795	0.076756	0.049721	0.0616398	0.0329557	0.042857	0.0170967	0.0293596	0.00373958	0.0143421	0.058473	0.0297851	0.0379032	0.0151307	0.0136919	0.0420672	0.0219286	0.045231	0.0156362	0.0295556	0.135332	0.0588463	0.116848	0.021171	0.0258399	0.0975618	0.0419306	0.059259	0.065968	0.0235779	0.0638764	0.0119891	0.0345878	0.00609825	0.00973176	1.34576	0.253736	0.227635	0.506674
Sox13	0.103631	0.165105	0.169071	0.0434729	0.0889248	0.0367987	0.0304375	0.0401281	0.0399763	0.0456433	0.117335	0.135779	0.132133	0.0719685	0.166528	0.100331	0.062174	0.0770252	0.0365547	0.061034	0.0957809	0.104998	0.0983511	0.0548803	0.114684	0.0978696	0.101436	0.0558638	0.067519	0.107871	0.130196	0.135798	0.104505	0.0873778	0.0754677	0.0848748	0.0406922	0.0953078	0.0463	0.0850302	0.0321829	0.0582203	0.0159973	0.0494713	0.0255232	0.0215882	0.0133452	0.0201466	0.00973003
Snrpe	2.59676	2.08979	2.29315	1.99243	2.59097	2.42418	1.93386	2.37588	2.35779	2.5523	3.11689	2.86666	3.02476	3.11269	3.51469	2.34642	2.04151	2.22035	1.97689	2.31846	3.32252	3.23274	2.81328	2.69356	3.15723	2.63908	2.26575	2.23767	2.31283	2.67123	3.03368	2.32159	2.77927	2.2243	2.69859	2.57772	2.20992	2.311	2.24064	2.73686	2.49583	2.1932	2.4277	2.3166	2.5986	2.96378	2.07179	2.30224	2.1792
Gm26706	0.00468881	0.00225349	0	0.00842125	0	0	0.00896411	0.00884478	0.00487702	0	0.00209188	0	0	0.00259498	0	0	0	0	0.0134358	0	0	0	0	0.00597023	0	0	0	0	0.00647954	0.00285829	0	0	0	0	0	0	0	0	0.0052003	0	0.0026853	0	0	0.00342179	0	0.00573132	0	0.00382741	0.0046382
Zc3h11a	0.0280856	0.0506705	0.0151872	0.0801245	0.0561023	0.0407014	0.0185211	0.0173399	0.0759628	0.0603005	0.0382672	0.0440442	0.0215639	0.0730187	0.0331088	0.0373997	0.0532306	0.0419563	0.0701843	0.0414502	0.0417242	0.0249346	0.0392866	0.085617	0.0467008	0.045769	0.0376721	0.0234968	0.119316	0.0641355	0.0568829	0.0236046	0.0285593	0.0726489	0.0643042	0.0709545	0.0172186	0.0308077	0.107334	0.041593	0.064046	0.0452685	0.0262931	0.0307079	0.0516266	0.0270328	0.0155573	0.0191565	0.0428085
Zc3h11a.1	0	0	0	0	0	0	0	0	0	0	0	0	0	0	0	0	0	0	0	0	0	0	0	0	0	0	0	0	0	0	0	0	0	0	0	0	0	0	0	0	0	0	0	0	0	0	0	0	0
Gm38394	0.0241662	0.0224429	0.0223936	0.0617502	0.0181221	0.027075	0.00802958	0.0138825	0.051183	0.0274765	0.028581	0.0319926	0.0185381	0.0493954	0.0389264	0.0336416	0.016072	0.0435322	0.0935178	0.0364317	0.0233959	0.0290188	0.0264639	0.062129	0.0359078	0.040892	0.0324915	0.0244373	0.056678	0.0253522	0.024663	0.0145834	0.035183	0.0324818	0.0447044	0.0395939	0.053114	0.0597862	0.0604252	0.027986	0.00850318	0.038361	0.00829217	0.0194135	0.0298511	0.00628694	0.021339	0.0321707	0.0513933
Zbed6	0	0	0	0	0	0	0	0	0	0	0	0	0	0	0	0	0	0	0	0	0	0	0	0	0	0	0	0	0	0	0	0	0	0	0	0	0	0	0	0	0	0	0	0	0	0	0	0	0
Lax1	0.00178441	0.00220653	0.00668426	0.00533193	0	0.0216774	0.00683427	0.0183823	0.0160191	0.00570988	0.0066155	0.00811705	0.0114687	0.0122427	0.0157343	0.0158019	0.0144753	0.00917005	0.00514055	0.00162486	0.00474669	0.00972168	0.00373427	0.00611735	0.00738874	0.0138173	0	0.00844308	0.0187555	0.00937287	0.00470856	0.0210084	0	0	0	0.00638797	0.00853865	0.00379391	0	0	0.0207031	0.00526278	0.00993401	0.0112372	0.0101833	0	0	0	0
Atp2b4	0.483924	0.409617	0.475644	0.340006	0.369761	0.719334	0.856076	0.900823	1.05435	0.877485	0.487341	0.507675	0.867384	0.770828	0.733853	0.512807	0.486852	0.72762	0.510156	0.463714	0.538996	0.401955	0.76344	0.598368	0.648241	0.52241	0.592574	0.850829	0.580508	0.582876	0.515499	0.732256	0.690307	0.545379	0.535494	0.380668	0.427653	0.577767	0.609811	0.548881	1.46404	1.48854	1.67411	1.60041	1.30101	0.356284	0.162048	0.214568	0.122041
Gm28441	0	0	0	0	0	0	0	0	0	0	0	0	0	0	0	0	0	0	0	0	0	0	0	0	0	0	0	0	0	0	0	0	0	0	0	0	0	0	0	0	0	0	0	0	0	0	0	0	0
Optc	0.0028509	0	0.00408685	0.00533193	0	0.0696244	0.0604739	0.173147	0.139891	0.0625473	0.0119473	0.00598946	0.00435104	0.0196698	0.0126135	0	0.0220186	0.00644237	0.00857578	0.01907	0.0282637	0.00861088	0.0110248	0.00773152	0.00742132	0.0123129	0.0190639	0.0241053	0.01828	0.00200895	0.00355314	0	0.0138162	0.0114747	0.00431679	0.00550899	0	0	0.013981	0.0157762	0.348652	0.244182	0.379303	0.283029	0.247693	0.0220666	0	0.00368222	0.00156489
Gm15851	0	0	0	0	0.00204346	0	0	0	0	0	0	0	0	0	0	0	0	0	0	0	0	0	0	0.00217073	0	0	0	0	0.00340018	0.00217325	0	0.010018	0	0.00800051	0.00175289	0	0	0	0	0	0	0	0	0.0099593	0.00150848	0	0	0	0
Prelp	0.353239	0.42758	1.00112	0.595059	0.716926	0.125711	0.212361	0.37217	0.566939	0.607935	0.0744518	0.165501	0.44869	0.230594	0.342973	0.0823365	0.413537	0.441932	0.333874	0.465115	0.0752013	0.299328	0.863882	0.50389	0.686038	0.207567	0.660007	1.54584	1.14758	1.26493	0.202067	0.573244	0.878643	0.76553	0.711659	0.0452359	0.148729	0.260594	0.370463	0.367076	0.361317	0.563304	0.495773	0.80245	0.665666	0	0	0.00408695	0.00571774
Gm1627	0	0	0	0	0.00264205	0	0	0	0	0.0014725	0	0	0	0	0	0	0	0	0	0	0.000956039	0.00686907	0	0.0040143	0.00120219	0	0.00202221	0	0	0	0	0	0	0.00415829	0	0	0	0	0	0	0	0	0	0	0	0	0	0	0
Fmod	0.181392	0.273498	0.408239	0.114309	0.167942	0.181802	0.294806	0.250595	0.211292	0.17548	0.247204	0.406806	0.560088	0.319406	0.338663	0.208084	0.359618	0.232021	0.0667918	0.124257	0.175853	0.171006	0.18235	0.0677149	0.120612	0.309693	0.59149	0.977292	0.44957	0.462555	0.280071	0.708221	0.586678	0.296336	0.266336	0.171002	0.209541	0.241272	0.143224	0.100775	0.0839743	0.219585	0.565226	0.27754	0.220751	0	0	0.00904664	0.001594
Btg2	21.0812	12.7317	11.9816	34.4798	34.7802	16.4532	10.1666	10.3372	27.6357	32.6066	16.2175	6.80993	7.01194	19.3485	18.3896	20.1554	11.504	15.0835	42.8818	43.7216	20.6235	7.24506	11.6129	29.8206	30.4303	16.7915	8.65751	9.13585	30.591	26.2063	5.32909	2.42653	4.65667	15.7575	6.50118	23.6626	11.5355	12.1912	33.4295	39.4337	13.4792	7.64848	7.91088	19.9506	24.9449	5.24979	5.13253	9.95322	15.6433
Chit1	0	0	0	0	0	0	0	0	0	0	0	0	0	0	0	0	0	0	0	0	0	0	0	0	0	0	0	0	0	0	0	0	0	0	0	0	0	0	0	0	0	0	0	0	0	0	0	0	0.000599754
Chil1	0	0	0	0	0	0	0	0	0	0	0	0	0	0	0	0.00313064	0	0	0	0	0	0	0	0	0	0	0	0	0	0	0	0	0	0	0	0	0	0	0	0	0	0	0	0	0	0	0	0	0
Mybph	0	0	0	0	0	0	0	0	0	0	0	0	0	0	0	0	0	0	0	0	0	0	0	0	0	0	0	0	0	0	0	0	0	0	0	0	0	0	0	0	0	0	0	0	0	0	0	0	0.000613952
Adora1	0.00140861	0	0	0	0	0	0	0	0	0.0037967	0	0	0	0	0	0.00324174	0.00341801	0	0	0	0	0	0	0	0	0	0	0	0	0	0	0	0	0	0	0	0	0	0	0	0	0	0	0	0	0	0	0	0.015977
Myog	0	0	0	0	0	0	0	0	0	0	0	0	0	0	0	0	0	0	0	0	0	0	0	0	0	0	0	0	0	0	0	0	0	0	0	0	0	0	0	0	0	0	0	0	0	0	0	0	0
Ppfia4	0.0114528	0.00544489	0	0	0.00435372	0.0178791	0	0	0.00672761	0.00270806	0.0100284	0.0152481	0.0101573	0.00198776	0	0.00659636	0.0132974	0.00341338	0	0	0.021578	0.0114807	0.00966151	0.00388506	0.00579826	0.00451447	0.0077086	0.00547774	0.00343827	0.00127549	0	0.00787417	0.0220885	0	0.00556153	0.0105916	0	0.0108533	0.0112716	0.00391175	0.016823	0.0172399	0.0208248	0.00496518	0.00181083	0	0.00410401	0	0
Tmem183a	0.262419	0.300583	0.210393	0.224013	0.240827	0.284709	0.286442	0.257372	0.28975	0.278338	0.255374	0.282322	0.274429	0.264798	0.254088	0.286347	0.242753	0.251641	0.289028	0.251939	0.284983	0.313563	0.287696	0.209755	0.319004	0.327427	0.347942	0.270259	0.287267	0.274835	0.288767	0.408511	0.157631	0.218391	0.279982	0.246342	0.326019	0.22698	0.244788	0.242097	0.254531	0.2832	0.261554	0.193402	0.296066	0.350872	0.221877	0.195297	0.23512
4933406M09Rik	0	0	0	0	0	0	0	0	0	0	0	0	0	0	0	0	0	0	0	0	0.00204456	0.00384195	0.00320517	0.00174203	0	0	0	0	0	0	0.00578184	0	0	0	0	0	0	0	0	0	0	0	0	0	0	0	0	0	0
Cyb5r1	0.0587927	0.0679764	0.0651711	0.0605044	0.0550545	0.067861	0.0989041	0.0763427	0.0416864	0.0428659	0.0782491	0.092546	0.0947725	0.0789241	0.0568511	0.0486217	0.0550227	0.113063	0.050692	0.0448739	0.0681808	0.138243	0.128226	0.0428946	0.0568599	0.0495821	0.032647	0.0857181	0.041598	0.0197607	0.0497079	0.0888457	0.098985	0.0893274	0.0452017	0.0762036	0.0377029	0.102309	0.0516943	0.0334611	0.035687	0.0437951	0.0591155	0.0473899	0.0502194	0.138008	0.162501	0.210288	0.152029
Adipor1	0.475996	0.333118	0.35466	0.479793	0.378722	0.421708	0.409374	0.314818	0.365759	0.377989	0.44993	0.324006	0.381395	0.365559	0.421206	0.485309	0.359041	0.382799	0.3943	0.430612	0.446353	0.370225	0.356369	0.479794	0.489146	0.469425	0.355519	0.210445	0.404803	0.301869	0.397527	0.504482	0.240338	0.380958	0.386193	0.416782	0.301003	0.319295	0.503693	0.317927	0.529601	0.282528	0.345089	0.410727	0.350476	0.93217	0.556732	0.622739	0.874557
Platr1	0.00123078	0.00215766	0.00422055	0	0	0	0	0.00270561	0.00181911	0	0.00145107	0	0	0	0	0	0	0	0	0	0.00479827	0	0	0	0.00208651	0	0	0	0	0.00216248	0	0.010439	0.0124571	0	0	0	0	0	0	0	0	0	0	0	0	0	0	0	0
Klhl12	0.148456	0.165946	0.203906	0.123048	0.158593	0.180759	0.14862	0.166627	0.130312	0.11796	0.1532	0.1685	0.153203	0.153157	0.169187	0.16553	0.181445	0.127184	0.146869	0.130859	0.15092	0.150685	0.17139	0.0995819	0.119561	0.16331	0.131536	0.155891	0.140167	0.133869	0.18561	0.214186	0.219783	0.172813	0.167893	0.216659	0.241425	0.176903	0.283595	0.185911	0.120674	0.121081	0.178378	0.0865399	0.115929	0.118424	0.118005	0.227467	0.149215
Rabif	0.068032	0.0783554	0.0669412	0.105053	0.138391	0.0996135	0.0369827	0.0829611	0.0715735	0.102141	0.0842764	0.0777051	0.101449	0.121115	0.136455	0.0816742	0.0570636	0.0685144	0.0571759	0.108736	0.0942934	0.092965	0.120059	0.0915686	0.129738	0.109965	0.0729942	0.0552144	0.106951	0.118856	0.112186	0.148495	0.068618	0.0704033	0.0913019	0.0661382	0.0726936	0.0684734	0.0742386	0.0713597	0.0362594	0.0964936	0.0922818	0.0915205	0.115843	0.118277	0.143449	0.191755	0.115293
Mgat4e	0	0	0	0	0	0	0	0	0	0.000499557	0	0.00154977	0	0	0	0	0	0	0.00919405	0	0	0	0	0	0	0	0	0	0	0	0	0	0	0	0	0	0	0	0	0	0	0	0	0	0	0	0	0	0
Kdm5b	1.49083	1.73341	1.48262	1.1992	0.88483	1.47617	1.21286	1.33271	1.20675	0.963051	1.18439	1.32347	1.37221	1.16456	1.06472	1.51405	1.44467	1.80454	1.49519	1.10218	1.1667	1.15941	1.44578	1.25055	1.09254	1.37112	1.31688	1.35884	1.05481	1.05433	1.51072	1.36927	1.42809	1.27562	0.803942	1.53851	1.48742	1.65856	1.5301	1.18973	1.20397	1.30285	1.09202	0.88343	0.756429	0.902876	1.31135	1.19082	1.11584
Gm26783	0	0	0	0	0	0	0	0.00386859	0	0	0	0	0	0	0	0	0	0	0	0	0	0	0	0	0	0	0	0	0	0	0	0	0	0	0	0	0	0	0.00538765	0	0	0	0	0	0	0	0	0	0
Syt2	0.0113037	0.0159554	0.0174533	0.00897848	0.00149379	0.0593252	0.0330779	0.0209646	0.0143646	0.0122215	0.019948	0.0109391	0.0139383	0.00434745	0	0.012651	0.00474278	0.00854103	0.00762265	0	0.0103036	0.0106268	0.0157161	0.0169559	0.00470722	0.0187774	0.00807505	0.0147296	0.0141706	0.00423882	0.0186461	0.0151596	0.0046284	0.0159521	0.00462353	0.0084711	0.0189525	0.0261678	0.00538765	0.0138507	0.069803	0.0108861	0.0289884	0.0235203	0.0232651	0	0	0	0.00378838
Ppp1r12b	0.391099	0.310266	0.23994	0.462837	0.442357	1.73996	1.25295	1.51499	1.60692	1.86012	0.49778	0.253936	0.282615	0.357638	0.364852	0.470941	0.449734	0.228992	0.328432	0.340161	0.334049	0.161148	0.175885	0.175967	0.174114	0.599838	0.432851	0.477258	0.582281	0.52275	0.678743	0.52007	0.535672	0.612153	0.545112	0.637212	0.423086	0.286411	0.472901	0.470511	2.9955	2.20949	2.31185	2.41141	2.57152	0.178908	0.180697	0.148783	0.277668
Gm28892	0	0	0	0	0	0	0	0	0	0	0	0	0	0	0.000942667	0	0	0	0.00467968	0	0	0.00289073	0	0	0	0	0	0	0	0	0	0	0	0	0	0	0	0	0	0	0	0	0	0	0	0	0	0	0
Ube2t	0.0150269	0.00128964	0.0104901	0.0229518	0	0.0121896	0.0045039	0.0141359	0.00842669	0.00833674	0.0153496	0.00224459	0.00545522	0.0105192	0.00884052	0.00695607	0.0106607	0.0182537	0.0050225	0.00426444	0.0124042	0	0.0113658	0.0325033	0.00808916	0.0124591	0.0194723	0.00572584	0.0226608	0.0150301	0.00512476	0.0085556	0.00728846	0.0314871	0.0063975	0.0173907	0.00361762	0	0.0076743	0.00339517	0.0349201	0.0182051	0.00905689	0.0114587	0.00797967	0.0108279	0.0470379	0.00716836	0.00981647
Lgr6	0.0196506	0.0455776	0.030492	0.0493799	0.0642845	0.134791	0.164258	0.199674	0.185668	0.200024	0.0115705	0.0407935	0.0259076	0.0167833	0.0290535	0.02383	0.0536094	0.0254268	0.0095826	0.0231792	0.00172242	0.00815183	0.0151221	0.00817577	0.00525905	0.0922805	0.101031	0.0799698	0.0442366	0.10824	0.0718222	0.105811	0.0450885	0.0925937	0.0943226	0.0207749	0.0684419	0.0545058	0.0472428	0.0831484	0.470487	0.589284	0.570935	0.476666	0.447324	0.0112294	0.212347	0.211657	0.0257872
Gm10535	0	0	0	0	0	0	0	0	0	0	0	0	0	0	0	0	0	0	0	0	0	0	0	0	0	0	0	0	0	0	0	0	0	0	0	0.00270908	0	0	0	0	0	0	0	0	0	0	0	0	0
Ptpn7	0.00223589	0	0	0	0	0	0	0	0	0.00152643	0	0.00342815	0	0	0	0	0	0	0	0	0	0.0016971	0.0017883	0	0	0	0	0	0	0	0	0	0	0	0	0	0	0	0	0	0	0	0	0	0	0	0	0	0
Arl8a	0.374556	0.223552	0.328966	0.466789	0.391205	0.463659	0.283984	0.402415	0.434012	0.447363	0.368754	0.191905	0.251639	0.232191	0.377354	0.339997	0.350449	0.338064	0.346922	0.446534	0.341166	0.236414	0.29668	0.295206	0.386229	0.429175	0.300501	0.347624	0.423595	0.532799	0.464653	0.265282	0.38976	0.279321	0.39807	0.331383	0.331881	0.385846	0.320503	0.410699	0.435952	0.319327	0.379695	0.361672	0.401376	0.424992	0.186822	0.217646	0.189773
Gm15445	0.00178949	0.00303582	0	0	0	0.00502883	0.00414632	0	0.00237908	0.00232802	0.00836491	0	0	0	0.0155202	0.00295257	0	0	0	0.00386426	0.00619572	0.00236452	0	0.00453355	0	0.00488867	0	0.00397671	0	0	0	0	0	0.00908537	0.00396796	0.00393477	0	0	0	0.00239613	0	0.0185656	0	0.00307638	0	0	0	0	0.00804156
Gpr37l1	0	0	0	0	0	0	0	0	0	0	0	0	0	0	0.00256281	0	0	0	0	0	0	0	0	0	0	0	0	0	0	0	0	0	0	0	0	0	0	0	0	0	0	0	0	0	0	0	0	0	0
Gm26642	0	0	0	0	0	0	0	0	0	0	0	0	0	0	0	0	0	0	0	0	0	0	0	0	0	0	0	0	0	0	0	0	0	0	0	0	0	0	0	0	0	0	0	0	0	0	0	0	0
Elf3	0.00157843	0	0	0	0	0	0	0.00868098	0	0.00176821	0	0.00615604	0.00960207	0	0.00134146	0.00302843	0	0	0	0	0.00268769	0.00270986	0.00146279	0	0	0	0	0.00461749	0	0.00257992	0	0	0	0	0	0	0	0	0	0.00295582	0.00314272	0	0	0	0	0	0	0	0
Rnpep	0.186574	0.12459	0.177332	0.119522	0.203621	0.311408	0.148149	0.210025	0.158482	0.232411	0.217006	0.154919	0.128138	0.149712	0.178896	0.173382	0.147691	0.217667	0.0876681	0.166645	0.241621	0.116938	0.12294	0.106721	0.145872	0.206785	0.162683	0.175745	0.150891	0.220354	0.308989	0.238622	0.215086	0.224231	0.245729	0.179795	0.118419	0.194266	0.115977	0.192717	0.314651	0.115694	0.132259	0.180907	0.216553	0.201786	0.179104	0.12643	0.111321
Timm17a	0.569846	0.519463	0.481699	0.435419	0.756453	0.69982	0.699146	0.621572	0.734749	0.916997	0.619973	0.620047	0.686295	0.665001	0.750548	0.573522	0.527641	0.585346	0.646884	0.79345	0.667343	0.586138	0.54701	0.627012	0.680434	0.651304	0.485125	0.508249	0.752092	0.798998	0.767929	0.823601	0.693696	0.722721	0.590602	0.546856	0.463282	0.602338	0.541187	0.717748	0.723254	0.680446	0.644405	0.881099	1.00102	1.16583	0.79908	0.802385	0.97341
Lmod1	0.0149911	0.0162975	0.0118347	0.0658606	0.0440696	1.46192	2.1029	3.00279	2.75413	2.74946	0.161115	0.200472	0.116494	0.123656	0.0605528	0.14317	0.266568	0.25503	0.174575	0.171371	0.167898	0.0936521	0.0735925	0.0272824	0.0473658	0.110063	0.130813	0.198683	0.150205	0.126266	0.0586266	0.254383	0.198256	0.307397	0.198683	0.0373815	0.0757797	0.0753716	0.150046	0.168825	4.78055	5.486	5.85145	5.87019	5.54911	0.0241096	0.00923121	0.0103882	0.0350406
Shisa4	0.16261	0.128819	0.0894794	0.103472	0.122563	0.380294	0.249447	0.348264	0.388258	0.422769	0.226745	0.184396	0.119553	0.221261	0.242573	0.3495	0.244165	0.102674	0.141618	0.191794	0.234551	0.113265	0.0959987	0.0992423	0.119885	0.416723	0.274821	0.357324	0.271192	0.40764	0.210655	0.324762	0.239659	0.239528	0.304646	0.200493	0.107734	0.181254	0.142283	0.244596	0.564083	0.448002	0.307491	0.272905	0.350853	0.111708	0.0306177	0.0201598	0.0247385
Ipo9	0.189749	0.147178	0.105896	0.247394	0.2255	0.268462	0.173049	0.182724	0.226044	0.28347	0.250414	0.192011	0.248205	0.252916	0.345931	0.251941	0.227209	0.185498	0.234466	0.285675	0.255665	0.187674	0.217485	0.206359	0.267258	0.259319	0.198457	0.241157	0.225244	0.306458	0.31117	0.214904	0.241945	0.28607	0.289716	0.225637	0.136041	0.132671	0.220549	0.22681	0.252755	0.258249	0.228747	0.228045	0.242093	0.156178	0.191352	0.179491	0.204116
Nav1	0.946328	0.746565	1.04055	0.507747	0.561542	0.476315	0.442977	0.529556	0.341816	0.330764	0.920164	1.00862	1.0254	0.806745	0.810845	0.688781	0.732885	0.837706	0.685552	0.48491	1.53543	1.51956	2.18258	1.55093	1.43794	0.580933	0.75325	0.587801	0.54644	0.322782	0.6005	0.77635	0.872898	0.531971	0.358243	0.614296	0.740385	0.832472	0.525074	0.456431	0.749927	0.43807	0.503397	0.336945	0.332714	0.62705	0.4408	0.544382	0.14513
Gm4793	0.00156617	0	0	0	0	0.00105898	0	0	0.00308513	0	0.00256443	0.00419649	0.00330915	0.00284059	0	0.00307829	0.00390381	0	0	0	0	0.00863454	0	0	0.00446647	0	0	0	0	0	0	0	0	0	0	0	0.00545242	0	0	0	0.00382331	0	0	0.00659502	0	0	0	0.00894452	0
Gm38399	0.0163467	0.0230136	0.0143273	0.0477828	0.0207864	0.00740097	0.024	0.029527	0.00906652	0.00631224	0.0280101	0.0193809	0.0446633	0.0287963	0.0086631	0.00894968	0.0133973	0.051038	0.00929163	0.00155244	0.0374376	0.0268893	0.073028	0.0381218	0.0286028	0.0121233	0.0123075	0	0.0282352	0.00909365	0.0346565	0.0180498	0.0534353	0.0480988	0.0201721	0.0180399	0.00691359	0.00870376	0.00558535	0	0.0331027	0.0258735	0.0355849	0.0103498	0.0153275	0.0114093	0.00261396	0.0093983	0.00490624
Csrp1	3.49799	4.52563	5.77322	3.87339	4.35281	6.46006	10.2725	11.903	9.67782	8.72087	3.16675	3.44259	2.67794	2.16186	1.88631	2.32537	4.07749	2.79447	2.61756	2.67361	3.72934	2.93019	3.66	2.49365	2.23417	3.58109	5.44242	4.97168	3.47907	3.53741	3.7163	4.74179	4.1688	3.23139	3.42164	3.01884	4.76969	3.19318	2.92362	2.89972	14.6165	21.1511	22.5647	19.7216	17.7304	0.207949	0.204484	0.232809	0.0850194
Phlda3	0.470257	0.828475	0.995989	0.767943	1.33683	0.362689	0.420063	0.485852	0.404079	0.631088	0.420305	0.44281	0.587383	0.455755	0.668162	0.332075	0.595702	0.564897	0.373841	0.743617	0.41786	0.495279	0.985293	0.696506	1.24553	0.459298	0.781683	1.04483	0.58514	0.711496	0.771028	1.39042	1.24997	0.944876	0.977125	0.240156	0.516058	0.406715	0.314969	0.630755	0.726138	0.506225	0.7437	0.627537	0.724722	0.136052	0.097263	0.15178	0.0471563
Tnni1	0.0238897	0.00281095	0.0192833	0.0314759	0	0.0346768	0.0326463	0.0420474	0.0328468	0.00145073	0.0236032	0.00670514	0.016426	0.0112942	0.00550393	0.020714	0.00566398	0.0137736	0.00776651	0.00326588	0.0258898	0.0131281	0.0186027	0.0179181	0.0132556	0.00182348	0.0071357	0	0.0101397	0	0.0037061	0.0208243	0.015478	0	0	0.0129548	0.0124154	0	0	0.00347326	0.0654335	0.0527822	0.0591874	0.0981845	0.0045832	0.0295046	0.0147567	0	0.00154764
Lad1	0	0	0	0	0	0	0	0.00248604	0.00452241	0	0	0	0	0	0	0	0	0	0	0	0	0	0	0	0	0	0	0	0	0	0	0	0	0	0	0	0	0	0	0	0.0102438	0	0	0	0	0	0	0	0
Tnnt2	0.0143927	0.00496261	0.00409953	0	0.00305559	1.2055	0.95779	1.07707	0.727153	0.505457	0.0496631	0.0323583	0.0623968	0.038443	0.0161396	0.0231804	0.010311	0	0.0136844	0	0.080126	0.0616331	0.0488509	0.0155223	0.0132873	0.0253523	0.0143563	0.0238952	0.00375046	0.0091586	0.0149598	0.0666778	0	0.0158385	0.00426116	0.00220088	0	0.00956295	0.00824623	0.00880255	5.77993	3.75938	3.3661	2.37459	1.70061	0.693996	0.364479	0.0939922	0.0167425
Pkp1	0	0	0	0	0	0	0	0	0	0	0	0	0	0	0	0	0	0	0	0	0	0	0	0	0	0	0	0	0	0	0	0	0	0	0	0	0	0	0	0	0	0	0	0	0	0	0	0	0
Igfn1	0	0	0	0	0	0	0	0	0	0	0	0	0	0	0	0	0	0	0	0	0.00373427	0	0.00314553	0	0	0	0	0	0	0	0	0	0	0	0	0	0	0	0	0	0	0	0	0	0	0	0	0	0
Tmem9	0.791336	0.807138	0.586669	0.665129	0.854773	0.706714	0.50728	0.482774	0.428761	0.465019	0.694964	0.548224	0.582493	0.421188	0.674273	0.753276	0.663026	0.624033	0.447002	0.630388	0.737847	0.636771	0.709183	0.488813	0.554813	0.731049	0.613975	0.736622	0.489162	0.667976	0.71949	0.751565	0.814986	0.566997	0.712889	0.829801	0.618844	0.821315	0.547582	0.605206	0.525073	0.361342	0.425056	0.337277	0.458101	0.531101	0.616152	0.466358	0.323232
Ascl5	0	0	0	0	0	0	0	0	0	0	0	0	0	0	0	0	0	0	0	0	0	0	0	0	0	0	0	0	0	0	0	0	0	0	0	0	0	0	0	0	0	0	0	0	0	0	0	0	0
Cacna1s	0.00208896	0	0	0	0	0.00223911	0	0.0036714	0	0	0.0118699	0.0314575	0.00996579	0.011419	0.0181888	0	0	0.00834325	0	0	0.226524	0.461264	0.422432	0.263801	0.289262	0	0.0046931	0	0	0	0	0	0	0	0	0	0	0	0	0	0	0.00885005	0	0	0	0	0.00895458	0.00323029	0.00615208
Gm37759	0	0	0	0	0	0	0	0	0	0	0	0	0.0018737	0	0	0	0	0	0	0	0.00217122	0.00833806	0.00183468	0	0.00162316	0	0	0	0	0	0	0	0	0	0	0	0	0	0	0	0	0	0	0	0	0	0	0	0
Kif21b	0	0.00146646	0	0	0.00959015	0.00137117	0.00130377	0.0187858	0.00671665	0	0.0539033	0.058878	0.0392002	0.0797081	0.0218141	0.0154273	0.0150207	0.0359313	0.00725754	0.00954573	0.377301	0.251929	0.30143	0.22803	0.145325	0.00852129	0.0270325	0.00287888	0.00685338	0.00536576	0.157835	0.0107573	0.0374191	0.0100166	0.00468296	0	0.0191978	0.0123224	0.0186479	0.00928653	0.0135585	0.00495237	0.00498853	0.0100072	0	0.00791352	0.00946751	0.0114164	0.00259791
Mroh3	0	0	0	0	0	0	0	0	0	0	0.00136443	0	0.00375384	0	0	0	0	0	0	0	0	0.00462798	0	0	0	0	0	0	0	0	0	0	0	0	0	0	0	0	0	0	0	0	0	0	0	0	0	0	0
5730559C18Rik	0.00183265	0	0	0	0	0	0	0	0	0	0.00782867	0.00158687	0.00354822	0	0	0	0	0	0	0	0.00859135	0	0.0030454	0.00181657	0.00226136	0	0.00606353	0	0	0	0	0	0	0	0	0	0	0	0	0	0	0	0	0	0	0	0	0	0
Gm26568	0	0	0	0	0	0	0	0	0	0	0	0	0	0	0	0	0	0	0	0	0.00445372	0	0	0.00345505	0	0	0	0	0	0	0	0	0	0	0	0	0	0	0	0	0	0	0	0	0	0	0	0	0
A430034D21Rik	0	0	0	0.00842125	0	0	0	0.00612542	0	0	0	0	0	0	0	0	0	0	0	0	0.00318199	0.00477116	0	0.00224464	0	0	0	0	0	0	0	0	0	0	0	0	0	0	0	0	0	0	0	0	0	0	0	0	0
Gm37552	0.000994514	0.00162213	0	0	0	0	0	0	0	0	0	0	0.00204367	0	0	0	0.00626741	0	0	0	0	0	0.00252909	0	0	0	0	0	0	0	0.00580844	0	0	0	0	0	0	0	0	0	0	0	0	0	0	0	0	0	0
Gm26781	0	0	0	0.00849551	0	0	0	0	0	0	0	0	0	0	0	0	0	0	0	0	0	0	0	0	0.00119225	0	0	0	0	0	0	0	0	0	0	0	0	0	0	0	0.0035916	0	0	0	0	0	0	0	0.000732829
Gpr25	0	0	0	0	0	0	0	0	0	0	0	0	0	0	0	0	0	0	0	0	0	0	0	0	0	0	0	0	0	0	0	0	0	0	0	0	0	0	0	0	0	0	0	0	0	0	0	0	0
Camsap2	0.26181	0.307359	0.252596	0.230304	0.216838	0.216487	0.190981	0.226085	0.272505	0.196543	0.173033	0.148408	0.180023	0.170343	0.251956	0.215769	0.224236	0.284028	0.285469	0.206979	0.172837	0.231856	0.257641	0.314729	0.208988	0.217987	0.204939	0.113506	0.188457	0.30084	0.30443	0.388606	0.22514	0.270892	0.201063	0.212651	0.230209	0.276241	0.247492	0.261996	0.167924	0.174457	0.201073	0.18464	0.164975	0.307626	0.209783	0.252277	0.19589
Ddx59	0.0579958	0.0248582	0.0133807	0.0445906	0.0351744	0.039999	0.016871	0.0219181	0.0178449	0.0269612	0.0602727	0.0166559	0.0266261	0.0439835	0.0309754	0.062956	0.0054985	0.0431366	0.0515073	0.0357927	0.0373921	0.0478047	0.0407388	0.0476205	0.0565199	0.0455726	0.0395617	0	0.0439472	0.0212266	0.0243341	0.0151532	0.0246256	0.0172308	0.0391385	0.0232329	0.0377319	0.0190567	0.0367995	0.0241301	0.0626606	0.0318224	0.0242004	0.0376031	0.0455668	0.110895	0.0304427	0.0343934	0.0338648
Kif14	0.00231416	0	0	0	0	0	0.00469863	0	0	0.00203732	0	0	0	0	0	0.00186498	0	0.00356192	0.00398048	0.00395944	0.00217122	0	0.000947006	0	0.00469385	0.00171868	0.00534373	0	0	0	0	0	0	0	0	0.00621833	0	0.0236421	0	0.00698119	0.00222109	0.00556437	0	0	0	0	0	0.00665581	0.000594358
Gm37799	0	0	0	0	0	0	0	0	0	0	0	0	0	0	0	0	0	0	0	0	0	0	0	0	0	0	0	0	0	0	0	0	0	0	0	0	0	0	0	0	0	0.00942809	0	0	0	0	0	0	0
Gm33994	0	0	0	0	0	0	0	0	0	0	0	0	0	0	0	0	0	0	0	0	0	0	0	0	0	0	0	0	0	0	0	0	0	0	0	0	0	0	0	0	0	0	0	0	0	0	0	0	0
4933409D19Rik	0	0	0	0	0	0	0	0	0	0	0	0	0	0	0	0	0	0	0	0	0	0	0	0	0	0	0	0	0	0	0	0	0	0	0	0	0	0	0	0	0	0	0	0	0	0	0	0	0
Platr23	0	0.00347746	0	0	0	0	0	0	0	0	0	0	0.00193509	0.00206851	0	0	0	0	0	0	0.00252133	0	0	0	0	0	0.00196106	0	0	0	0	0	0	0.00798602	0	0	0	0	0	0	0	0	0	0	0	0	0	0	0
Zfp281	0.258356	0.157279	0.151618	0.195407	0.232652	0.374431	0.187793	0.191039	0.273067	0.259813	0.255462	0.17124	0.241305	0.166843	0.233787	0.196596	0.161832	0.154248	0.181929	0.234664	0.133182	0.103731	0.160054	0.170365	0.222092	0.225763	0.187774	0.146626	0.201595	0.240441	0.310228	0.225527	0.140179	0.168627	0.211205	0.299459	0.181357	0.207927	0.32151	0.284943	0.368776	0.250601	0.25507	0.256894	0.248259	0.182067	0.177775	0.256104	0.185195
Gm19705	0.00523754	0.00400181	0.0169839	0.0081379	0.00855533	0.00555302	0.00402507	0.0098936	0.018136	0.0081296	0.0181395	0.00128221	0.0142268	0.0193008	0.0277774	0.00764086	0.00925622	0.00947146	0.00651334	0.00241933	0.00218465	0.00224926	0.00376592	0.0107295	0.00962592	0.0334146	0.0164124	0.0604984	0.0261293	0.0344198	0.005583	0	0	0.0361926	0.0163575	0.00779428	0	0.0176933	0.0103636	0.00263872	0.00387279	0.00868143	0.0206947	0.013106	0.0276204	0	0	0	0.00849469
Platr22	0.00166394	0	0	0	0	0.00301718	0	0	0	0	0	0	0	0	0	0	0	0	0	0	0	0	0	0	0	0	0	0	0	0	0	0	0	0	0	0	0	0	0	0	0	0	0	0	0	0	0	0	0
Nr5a2	0.0566397	0.10437	0.159802	0.0154759	0.091631	0.0697012	0.117939	0.144683	0.0128219	0.126578	0.025405	0.066955	0.0853806	0.0220723	0.0728405	0.0529667	0.12063	0.234188	0.0322917	0.160206	0.0165467	0.0800671	0.0858881	0.00983358	0.0515026	0.0675163	0.0956332	0.167165	0.0371504	0.0997194	0.0592598	0.128202	0.187463	0.10476	0.131135	0.0713939	0.0895849	0.193435	0.0311073	0.119082	0.116635	0.0511329	0.114662	0.0131946	0.0711795	0.0655413	0.0924638	0.111763	0.0188554
Gm26979	0	0	0	0	0	0	0	0	0	0	0	0	0	0	0	0	0	0	0	0	0	0	0	0	0	0	0	0	0	0	0	0	0	0	0	0	0	0	0	0	0	0	0	0	0	0	0	0	0
Gm26936	0	0	0	0	0	0	0	0	0.00468008	0	0	0	0	0	0	0	0	0	0	0	0	0	0	0	0	0	0	0.00494889	0	0	0	0	0	0	0	0	0	0	0	0	0	0	0	0	0	0	0.00732383	0	0
A430106G13Rik	0.0227306	0.0129521	0	0.00865581	0.0679652	0.0200191	0.00558128	0.00803811	0.0311444	0.0161281	0.00986479	0	0.00929642	0.00383712	0.0129654	0.01065	0.00807517	0	0.0173093	0.0177118	0.00585254	0.00395344	0.00708633	0.010278	0.0138416	0.0179863	0	0.00231414	0.0063402	0.0260081	0.0387098	0.00882243	0.0238914	0.0244766	0.00998813	0.0148588	0.00464133	0.00753541	0.0154414	0.038582	0.00662016	0.00390367	0	0.0229642	0.0256019	0.0114093	0.00429949	0.0103606	0.00561862
Ptprc	0.00256352	0	0	0.0117082	0	0.00383896	0	0.00364945	0	0.00310548	0	0	0	0	0	0.00467893	0	0	0.00280727	0.0138461	0	0	0	0	0	0	0	0	0	0	0	0	0	0	0	0	0	0	0	0.00651491	0	0	0	0	0	0	0	0	0
Gm28556	0	0	0	0	0	0	0	0	0	0	0	0	0	0	0	0	0	0	0	0	0	0	0	0	0	0	0	0	0	0	0	0	0	0	0	0	0	0	0	0	0	0	0	0	0	0	0	0	0
Atp6v1g3	0	0	0	0	0	0	0	0	0	0	0	0	0	0	0	0	0	0	0.0044195	0	0	0	0	0	0	0	0	0	0	0	0	0	0	0	0	0	0	0	0	0	0	0	0	0	0	0	0	0	0
Nek7	0.518886	0.528743	0.449317	0.595493	0.522598	0.710244	0.615058	0.61515	0.810459	0.736878	0.423937	0.352106	0.418576	0.371017	0.439534	0.662301	0.575552	0.500781	0.645099	0.637166	0.459318	0.282679	0.448341	0.466217	0.53202	0.582986	0.472828	0.573502	0.625431	0.633269	0.501597	0.523114	0.473446	0.606093	0.550642	0.529888	0.475729	0.558261	0.649479	0.678601	0.929461	0.596637	0.711044	0.77351	0.934318	0.376537	0.370902	0.448556	0.400101
Gm28501	0	0	0	0	0	0	0	0	0	0	0	0	0	0	0	0	0	0	0	0	0	0	0	0	0	0	0	0	0	0	0	0	0	0	0	0	0	0	0	0	0	0	0	0	0	0	0	0	0
Gm5833	0	0	0	0	0	0	0	0	0	0	0	0	0	0	0	0	0	0	0	0	0	0	0	0	0	0	0	0	0	0	0	0	0	0	0	0	0	0	0	0	0	0	0	0	0	0	0	0	0
Lhx9	0.0262385	0.0143827	0.0304389	0.0384969	0.0590629	0.33039	0.115524	0.183222	0.269449	0.30437	0.102956	0.0620483	0.0777112	0.147062	0.110679	0.20863	0.0738388	0.085726	0.250411	0.276297	0.0634319	0.0606088	0.0539842	0.155411	0.20499	0.0909462	0.0467854	0.0535704	0.0729754	0.0329607	0.364879	0.11672	0.116316	0.147488	0.106867	0.0564788	0.0231886	0.0909268	0.16465	0.107798	0.250475	0.150386	0.100586	0.263097	0.264844	0.0159729	0.192964	0.0971437	0.0195549
2310009B15Rik	0.533443	0.357182	0.351932	0.323967	0.358759	0.633125	0.38949	0.497777	0.575965	0.50658	0.66338	0.616664	0.703144	0.88171	0.748819	0.639328	0.484011	0.647583	0.590838	0.645013	0.773254	0.703039	0.728312	0.767004	0.762517	0.668588	0.496312	0.584535	0.596256	0.535179	0.748437	0.5664	0.534783	0.743507	0.644835	0.549771	0.409917	0.419821	0.604102	0.629734	0.536508	0.426532	0.425028	0.59573	0.629251	0.572718	0.716474	0.701599	0.667211
1700019P21Rik	0	0	0	0	0	0	0	0	0	0	0	0	0	0	0	0	0	0	0	0	0	0	0	0	0	0	0	0	0	0	0	0	0	0	0	0	0	0.00610648	0	0	0	0	0	0	0	0	0	0	0
Dennd1b	0.273813	0.269433	0.189369	0.365408	0.183428	0.242317	0.249318	0.207031	0.279497	0.263973	0.251984	0.212775	0.360863	0.340813	0.270031	0.275196	0.288405	0.404289	0.483803	0.440678	0.320434	0.318841	0.317348	0.408083	0.403426	0.28458	0.280219	0.26187	0.391978	0.291128	0.459093	0.248043	0.419348	0.453186	0.345454	0.253841	0.28446	0.29905	0.509283	0.344736	0.190543	0.172388	0.127564	0.168948	0.195519	0.157385	0.491595	0.751651	0.485449
Crb1	0	0	0.00509497	0	0	0.00685488	0.00237631	0	0.00240242	0.00827632	0	0.00197668	0	0	0	0	0	0.00509638	0.0160195	0.00874619	0	0.00212718	0.00815727	0.0165102	0	0	0	0.0130839	0	0	0	0.0230146	0.0107677	0	0.00699806	0	0	0.00631025	0	0	0.00162642	0	0	0	0.0024867	0	0	0	0.00403898
4933436E23Rik	0	0	0	0	0	0	0	0	0	0	0	0	0	0	0	0	0	0	0	0	0	0	0	0	0	0	0	0	0	0	0	0	0	0	0	0	0	0	0	0	0	0	0	0	0	0	0	0	0
Gm34816	0	0	0	0	0	0	0	0	0	0	0	0	0	0	0	0	0	0	0	0	0	0	0	0	0	0	0	0	0	0	0	0	0	0	0	0	0	0	0	0	0	0	0	0	0	0	0	0	0
Zbtb41	0.318812	0.264149	0.250715	0.332032	0.339957	0.32368	0.288698	0.269289	0.390483	0.344044	0.470914	0.430524	0.464465	0.50979	0.663413	0.456758	0.358609	0.309353	0.361431	0.408803	0.457437	0.389241	0.333669	0.454673	0.526751	0.360659	0.180913	0.338238	0.405724	0.403165	0.554568	0.509983	0.358191	0.476256	0.528579	0.493984	0.429375	0.409204	0.367018	0.467649	0.173375	0.157287	0.187643	0.269048	0.330926	0.21857	0.360234	0.444014	0.335862
Aspm	0.0798885	0.0134601	0.0522078	0.0170171	0.0156551	0.0321094	0.0433066	0.0279755	0.02461	0.0043668	0.104802	0.0853242	0.0995005	0.0572487	0.0638802	0.093451	0.0465098	0.0869677	0.0217037	0.0278592	0.109676	0.0798983	0.0638149	0.0665976	0.0643711	0.0628963	0.0265082	0.0291689	0.0170409	0.019825	0.116628	0.0239414	0.0522256	0.0204623	0.0264899	0.0679006	0.0452743	0.0742467	0.0398985	0.0440164	0.01474	0.00519449	0.0162554	0.00814138	0.00259913	0.0265345	0.100126	0.0583894	0.0278745
F13b	0	0	0	0	0	0	0	0	0	0	0	0	0	0	0	0	0	0	0	0	0	0	0	0	0	0	0	0	0	0	0	0	0	0	0	0	0	0	0	0	0	0	0	0	0	0	0	0	0
Cfhr1	0	0	0	0	0	0	0	0	0	0	0	0	0.00237237	0	0.00160832	0	0	0.0112382	0	0	0	0.00237354	0	0.00153507	0.0010659	0	0	0	0	0	0	0	0	0.00986147	0.001998	0	0	0	0	0	0	0	0	0	0	0	0	0	0
Gm4788	0.00992658	0.0152435	0.0310953	0	0.00417914	0.0212993	0.0217611	0.0296853	0.00500116	0.00880065	0.00837069	0.0171644	0.0044724	0.00802823	0.00443118	0.00410887	0.0379085	0.00471851	0.00530802	0.00356783	0.0024002	0.0116777	0.00230527	0.0106499	0.00370706	0.00670572	0.0211243	0.0365856	0	0.0138649	0.0113168	0.0684401	0.0179549	0.0153923	0.00213084	0.00648517	0.0171159	0.0176248	0.00622439	0.00885708	0	0.00533185	0	0	0.0105429	0	0.00434957	0	0.00117167
Cfhr2	0.0125551	0.0145761	0	0	0.0030424	0.00311066	0.00873063	0	0	0.0081386	0.0110262	0	0.00569298	0.00860868	0.00747051	0.0091452	0	0	0.0144695	0.0073778	0.00922982	0	0.00639015	0.00633987	0.014326	0.0100316	0.0234877	0.0114465	0.00960238	0.00962953	0.00914358	0	0	0	0.0161671	0.015285	0.0023774	0	0.00638452	0.020051	0	0.0240107	0.00331279	0.00775854	0.00438427	0	0.00550896	0	0
Cfh	21.7346	14.8865	15.6123	20.4993	21.249	25.1742	17.4294	16.4568	20.4211	19.2088	22.53	15.5241	13.7946	17.037	17.8763	33.0198	25.7635	23.8452	30.6038	29.6735	15.5095	9.71197	11.1695	21.9495	17.4741	33.4408	22.3692	24.253	31.7747	26.6599	36.1847	31.4148	29.9164	37.9727	32.0372	34.4431	23.6462	20.7416	28.3177	26.1925	6.27577	6.91549	8.5084	14.897	13.7698	1.00438	0.945557	1.27642	0.90103
Kcnt2	0.245769	0.27062	0.249376	0.75614	0.463423	0.375637	0.444764	0.395945	0.917158	0.680846	0.403665	0.27961	0.389538	0.807129	0.622303	0.649007	0.517295	0.60631	1.01886	0.85593	0.305815	0.115007	0.127761	0.432859	0.342103	0.606811	0.443732	0.659888	1.19027	0.89912	0.609401	0.455231	0.427887	0.976374	0.848995	0.587706	0.510399	0.423625	0.983569	0.798717	0.132434	0.129071	0.238485	0.428943	0.410585	0.0173586	0.0417221	0.0202426	0.0334964
4930590L20Rik	0	0	0	0	0	0	0.00267512	0.00273184	0	0	0	0	0	0	0.0017418	0	0	0	0.00353847	0	0	0	0	0	0	0	0	0.00356703	0.00654365	0	0	0	0	0	0	0	0.0049285	0	0	0.00283595	0	0	0.00310097	0	0.00161989	0	0.00523509	0	0
Cdc73	0.448641	0.419838	0.460306	0.457159	0.424812	0.472686	0.422865	0.382858	0.517236	0.381499	0.385902	0.392592	0.418202	0.481005	0.366382	0.490674	0.359993	0.40678	0.499131	0.440216	0.429386	0.386794	0.400502	0.432624	0.426352	0.382043	0.421574	0.421978	0.443591	0.336947	0.478331	0.3613	0.436059	0.494742	0.440396	0.472393	0.429278	0.417909	0.50188	0.435576	0.330361	0.554887	0.326095	0.404556	0.37487	0.368913	0.336827	0.366545	0.54066
B3galt2	0.00999785	0.0181168	0.00363616	0.00491777	0.0216928	0	0.00866535	0.00397227	0.0149362	0.0119288	0.00108825	0.00708971	0.0114513	0.0034174	0.00409865	0	0.00219483	0.00453882	0.00547909	0	0.00181071	0.00473124	0.011339	0	0.00447107	0	0.00527926	0.00508258	0	0	0.00562	0.0127494	0.00607315	0.0154444	0.00586437	0.00257063	0.0249089	0	0	0.0191673	0.00286645	0.0122231	0	0.00323137	0.00425032	0	0.00802298	0.00497324	0.00335146
Glrx2	0.605027	0.533205	0.423242	0.525151	0.58451	0.651605	0.628299	0.584449	0.728222	0.869821	0.598711	0.61372	0.542358	0.656335	0.677982	0.515539	0.559828	0.480281	0.467443	0.712927	0.627058	0.566139	0.588185	0.49328	0.616313	0.644884	0.602277	0.464342	0.636516	0.747614	0.710948	0.764347	0.560135	0.550007	0.700053	0.525912	0.567381	0.348286	0.405461	0.678712	0.895554	0.810929	0.810753	1.00937	0.972583	0.780875	0.59388	0.486438	0.566885
Trove2	0.427229	0.3705	0.239149	0.360419	0.451725	0.524501	0.354183	0.322338	0.465764	0.582981	0.373113	0.26214	0.263244	0.347419	0.344618	0.426722	0.259967	0.231688	0.578111	0.49209	0.381437	0.23416	0.254777	0.313894	0.361466	0.33918	0.266873	0.333755	0.411051	0.434722	0.460036	0.343855	0.352813	0.462462	0.434611	0.367711	0.263724	0.235488	0.395906	0.430436	0.439553	0.374338	0.324462	0.509384	0.558139	0.186259	0.194829	0.214514	0.252401
Uchl5	0.180724	0.20214	0.100734	0.195084	0.229525	0.198963	0.20576	0.155134	0.157344	0.233179	0.203414	0.178119	0.206834	0.148609	0.218752	0.177425	0.134418	0.194803	0.121658	0.230383	0.19232	0.229467	0.204628	0.194658	0.215623	0.228667	0.184989	0.150715	0.126961	0.147991	0.166544	0.204514	0.123546	0.283913	0.180804	0.162078	0.136335	0.230481	0.102835	0.141371	0.20636	0.155296	0.171839	0.208559	0.252495	0.218634	0.198153	0.179436	0.195264
Rgs2	4.64374	6.68621	7.0105	5.45665	8.88953	4.86606	5.80281	6.42966	4.47139	10.9108	4.0551	3.57454	3.91837	3.37191	3.77256	3.87487	3.56661	4.52552	4.63843	8.18233	4.30053	2.50311	3.76409	3.47117	3.99351	3.57884	5.00766	3.62456	5.03257	6.02105	2.48485	1.07337	1.44159	1.60899	1.7738	7.87469	7.4518	8.7198	10.3891	14.33	3.92029	2.85026	4.17353	2.87196	7.39623	0.877133	1.27078	2.03254	0.545994
Rgs13	0	0.00396063	0.00590175	0	0.0112605	0.028296	0	0.0221317	0.0262176	0.0235949	0	0.00346452	0	0	0.00183472	0	0.00427854	0	0	0.0050033	0	0	0	0	0.00641558	0.00155238	0.00384002	0	0	0	0	0	0.00773898	0.0181613	0.00390951	0.00216935	0.00234123	0	0.00674145	0.0339877	0.0161818	0.00423167	0	0.0763116	0.0133358	0	0	0	0.00433144
Rgs1	0	0	0	0	0.00443779	0.0230338	0	0.0046059	0	0	0	0	0	0	0	0.00204	0	0.00829485	0.00430248	0.00717932	0	0	0	0	0.00210372	0	0	0	0	0.00112717	0	0	0	0.0082346	0	0	0	0.00723955	0	0	0	0	0	0	0.00316069	0	0	0	0
Rgs21	0	0	0	0	0	0	0	0	0	0	0	0	0	0	0	0	0	0	0	0	0	0	0	0	0	0	0	0	0	0	0	0	0	0	0	0	0	0	0	0	0	0	0	0	0	0	0	0	0
Rgs18	0	0	0	0	0	0	0	0	0	0	0	0	0	0	0	0	0	0	0.00405177	0	0	0	0	0	0	0	0	0	0	0	0	0	0	0	0	0	0	0	0	0	0	0	0	0	0	0	0	0	0
Gm29514	0	0	0	0	0	0	0	0	0	0	0	0	0	0	0	0	0	0	0	0	0	0	0	0	0	0	0	0	0	0	0	0	0	0	0	0	0	0	0	0	0	0	0	0	0	0	0	0	0
Brinp3	0	0	0	0	0	0	0	0	0	0	0	0	0	0	0	0	0	0	0	0	0	0	0	0	0	0	0.00161713	0	0	0	0	0	0	0	0	0	0	0	0	0	0	0	0	0	0	0	0	0	0
Gm15584	0	0	0	0	0	0	0	0	0	0	0	0	0	0	0	0	0	0	0	0	0	0	0	0	0	0	0	0	0	0	0	0	0	0	0	0	0	0	0	0	0	0	0	0	0	0	0	0	0
Gm29515	0	0	0	0	0	0	0	0	0	0	0	0	0	0	0	0	0	0	0	0	0	0	0	0	0	0	0	0	0	0	0	0	0	0	0	0	0	0	0	0	0	0	0	0	0	0	0	0	0
Gm29020	0	0	0	0	0	0	0	0	0	0	0	0	0	0	0	0	0	0	0	0	0	0	0	0	0	0	0	0	0	0	0	0	0	0	0	0	0	0	0	0	0	0	0	0	0	0	0	0	0
Gm29398	0	0	0	0	0	0	0	0	0	0	0	0	0	0	0	0	0	0	0	0	0	0	0	0	0	0	0	0	0	0	0	0	0	0	0	0	0	0	0	0	0	0	0	0	0	0	0	0	0
Pla2g4a	0.40288	0.373585	0.430746	0.334004	0.384963	0.219688	0.13564	0.0851351	0.133718	0.129175	0.237196	0.166636	0.164479	0.208163	0.147018	0.276756	0.160025	0.137778	0.220175	0.197813	0.433575	0.252718	0.455574	0.617294	0.508156	0.186568	0.142776	0.248369	0.203413	0.156137	0.247718	0.187578	0.20081	0.349818	0.195963	0.304052	0.135077	0.154235	0.160226	0.121423	0.0714552	0.0788756	0.0419198	0.0668759	0.0814207	0.0183893	0.0211166	0.0561844	0.0184741
Ptgs2	0.0466423	0.0683796	0.0896937	0.0238331	0.0185315	0.00782147	0.0301262	0.166427	0.040609	0.0531794	0.0276973	0.0167133	0.0103603	0.06444	0.0388664	0.00798818	0.007507	0.0267113	0.0918894	0.0509014	0.0360748	0.0179298	0.147971	0.183475	0.183897	0.0248496	0.0451004	0.0534323	0.114829	0.0549515	0.0133146	0	0	0	0	0.0511132	0.0920636	0.0753823	0.224328	0.171456	0.0040544	0.00512368	0.0160957	0.00398342	0.0334128	0	0	0	0.00283173
Ptgs2os2	0.00262277	0	0	0	0	0	0	0	0	0	0	0	0	0	0	0	0	0	0.00380636	0	0	0	0	0	0	0	0	0	0	0	0	0	0	0	0.00334236	0	0	0	0	0	0	0	0	0	0	0	0	0	0
Pdc	0	0	0	0	0	0	0	0	0	0	0	0	0	0	0	0	0	0	0	0	0	0	0	0	0	0	0	0	0	0	0	0	0	0	0	0	0	0	0	0	0	0	0	0	0	0	0	0	0
2310030A07Rik	0	0	0	0	0	0	0	0	0	0	0	0	0	0	0	0	0	0	0	0	0	0	0	0	0	0	0	0	0	0	0	0	0	0	0	0	0	0	0	0	0.00276374	0	0	0	0	0	0	0	0
BC003331	0.42788	0.413736	0.502277	0.495492	0.427801	0.383254	0.459313	0.408158	0.388403	0.446662	0.491498	0.37823	0.439182	0.419126	0.444528	0.366522	0.455942	0.373971	0.443444	0.452864	0.414261	0.386099	0.499283	0.4794	0.457375	0.411607	0.328219	0.418145	0.491074	0.493298	0.580178	0.532335	0.497163	0.447722	0.385168	0.491441	0.549164	0.395246	0.451566	0.540413	0.383659	0.440061	0.396466	0.386634	0.377867	0.351677	0.545364	0.46888	0.463193
Tpr	2.44274	2.34259	1.97809	2.25388	2.26052	2.18104	2.14236	1.79587	2.07067	2.1703	2.24499	2.09975	1.97914	2.03235	2.09444	2.15898	1.96633	1.79853	1.80336	2.30572	2.2274	2.08891	2.11395	2.16249	2.36877	2.02869	2.13254	1.74757	1.90231	2.11804	2.11743	2.3191	1.84123	2.29545	2.06454	2.36446	2.24584	1.80482	2.27956	2.52653	2.39031	1.96148	1.88254	1.74392	1.95581	2.80349	1.9918	2.06361	2.28611
Prg4	0.0133921	0.00320234	0.0146116	0.0422089	0.0306393	0.0322245	0.00472145	0.0202508	0.00820371	0.0101285	0.00403511	0.00328257	0	0.00420805	0.00408485	0.0208714	0	0.00602332	0.0219197	0.00644049	0.0206559	0	0.00918597	0	0.00535176	0.0580357	0.00661626	0.00435799	0.0103082	0.0092431	0.0276018	0.0163394	0.00748001	0.0128766	0.00691525	0.0404656	0.0101366	0.0276306	0	0	0.00666931	0	0.00982987	0.00441107	0.00129355	0.0615915	0	0.00411584	0
Hmcn1	0.977239	0.499145	0.382789	0.329999	0.2118	0.24725	0.204775	0.117535	0.0441979	0.0594711	0.304335	0.100638	0.0637036	0.0238217	0.0741757	0.208945	0.110011	0.0199402	0.0146992	0.0277614	0.120523	0.027815	0.0286345	0.0112105	0.0145769	0.206842	0.120264	0.0750085	0.0270081	0.0603853	0.757312	0.246839	0.181365	0.0499768	0.0697665	0.58296	0.282369	0.105026	0.0567025	0.0378361	0.0866686	0.128377	0.0871389	0.0300584	0.0168405	0	0.00523509	0.00268404	0.00237504
Gm20631	0	0.00582139	0	0	0	0	0	0	0	0	0	0	0.00293028	0	0	0	0	0	0	0	0	0	0	0	0	0	0	0	0	0	0.00479438	0	0	0	0	0	0.0224306	0	0	0	0	0	0	0	0	0	0	0	0
Gm29188	0	0	0	0	0	0	0	0	0	0	0	0	0	0	0	0	0	0	0	0	0	0	0	0	0	0	0	0	0	0	0	0	0	0	0	0	0	0	0	0	0	0	0	0	0	0	0	0	0
C730036E19Rik	0	0	0	0	0	0	0	0	0	0	0	0	0	0	0	0	0	0	0	0	0	0	0	0	0	0	0	0	0	0	0	0	0	0	0	0	0	0	0	0	0	0	0	0	0	0	0	0	0
Gm47985	0	0	0	0	0	0	0	0	0	0	0	0	0	0	0	0	0	0	0	0	0	0	0	0	0	0	0	0	0	0	0	0	0	0	0	0	0	0	0	0	0	0	0	0	0	0	0	0	0
Gm8947	0	0	0	0	0	0	0	0	0	0	0.00228293	0	0	0	0	0	0	0	0	0	0	0	0	0	0	0	0	0	0	0	0	0	0	0	0	0	0	0	0	0	0	0	0	0	0	0	0	0	0
Gm47995	0	0	0	0	0	0	0	0	0	0	0	0	0	0	0	0	0	0	0	0	0	0	0	0	0	0	0	0	0	0	0	0	0	0	0	0	0	0	0	0	0	0	0	0	0	0	0	0	0
3110040M04Rik	0	0	0	0	0	0	0	0	0	0	0	0	0	0	0	0	0	0	0	0	0	0	0	0	0	0	0	0	0	0	0	0	0	0	0	0	0	0	0	0	0	0	0	0	0	0	0	0	0
Gm47996	0	0	0	0	0	0	0	0	0	0	0	0	0	0	0	0	0	0	0	0	0	0	0	0	0	0	0	0	0	0	0	0	0	0	0	0	0	0	0	0	0	0	0	0	0	0	0	0	0
Gm10138	0.0522045	0.067412	0.0775534	0.0571882	0.0372084	0.0588924	0.0470978	0.0598288	0.0246884	0.0311271	0.053874	0.0735273	0.0571472	0.0417216	0.0409032	0.0551758	0.0586777	0.0363998	0.0474386	0.0602456	0.0272062	0.0631117	0.0450662	0.0422705	0.0269226	0.0801271	0.0450051	0.0667951	0.093557	0.0485572	0.0412902	0.0472285	0.0856058	0.0729121	0.0451252	0.0388789	0.0417468	0.130642	0.0229715	0.0459765	0.0270252	0.0592203	0.0421361	0.0195844	0.026397	0.029691	0.0209409	0.0386054	0.0416244
Ivns1abp	0.579223	0.535044	0.50814	0.478743	0.417718	0.343862	0.455825	0.551378	0.265272	0.276826	0.391618	0.460494	0.5764	0.403091	0.365176	0.383583	0.413913	0.506366	0.314195	0.365763	0.460714	0.460362	0.558121	0.369483	0.337686	0.420564	0.440833	0.354935	0.293868	0.2835	0.495059	0.500192	0.551328	0.328161	0.361398	0.47873	0.70921	0.611567	0.455912	0.443755	0.26117	0.357928	0.321078	0.220267	0.195733	0.414936	0.311687	0.526625	0.376236
Swt1	0.63322	0.562805	0.654688	0.847621	0.666914	0.651904	0.417166	0.428842	0.64791	0.672092	0.476043	0.438601	0.405061	0.597342	0.544486	0.717208	0.523178	0.453957	0.76567	0.801246	0.450596	0.266917	0.440462	0.659816	0.60155	0.5316	0.449401	0.354415	0.599768	0.613431	0.619149	0.524601	0.810146	1.12608	0.759301	0.517359	0.382848	0.446065	0.611393	0.66042	0.529792	0.415774	0.390244	0.601609	0.585591	1.19134	0.547507	0.606809	0.752631
Trmt1l	0.165681	0.103114	0.129498	0.108738	0.202887	0.189281	0.108481	0.104917	0.131996	0.183048	0.138701	0.092948	0.137573	0.148737	0.17811	0.127963	0.126353	0.143313	0.158616	0.196808	0.125757	0.0615988	0.0741145	0.193122	0.153478	0.185842	0.0733685	0.117995	0.151615	0.256613	0.206599	0.139364	0.263611	0.290075	0.301495	0.128173	0.0777411	0.125211	0.0878855	0.209151	0.23841	0.0270144	0.0601796	0.14542	0.14243	0.283662	0.234801	0.165168	0.18055
Rnf2	0.378041	0.28665	0.312866	0.341735	0.353848	0.336005	0.288263	0.271511	0.24872	0.348662	0.339629	0.271281	0.328938	0.389783	0.398497	0.435614	0.27307	0.318417	0.402895	0.38172	0.348712	0.230187	0.37261	0.449465	0.483708	0.36077	0.304607	0.372105	0.463905	0.387283	0.284502	0.312188	0.25091	0.377457	0.353253	0.362529	0.211674	0.287605	0.345221	0.356098	0.302863	0.197936	0.180157	0.261058	0.22466	0.781755	0.283922	0.525058	0.431612
Gm28181	0	0	0	0	0	0	0	0	0	0	0	0	0	0	0	0	0	0	0	0	0	0	0	0	0	0	0	0	0	0	0	0	0	0	0	0	0	0	0	0	0	0	0	0	0	0	0	0	0
Fam129a	0.00914414	0.0078349	0.00969088	0.0253583	0.00525128	0.0118489	0.0178958	0.0241469	0.0287542	0.010913	0.0243801	0.0575076	0.106488	0.104697	0.0372221	0.129944	0.137269	0.277892	0.136659	0.0735476	0.0744822	0.0310862	0.145674	0.126579	0.0791114	0.132198	0.177104	0.283092	0.303886	0.0732889	0.160937	0.126411	0.102158	0.180356	0.0910586	0.0122358	0.0301666	0.0962965	0.0742949	0.028702	0.0132012	0.0313343	0.0191597	0.00604697	0	0.676647	0.312294	0.432365	1.9192
2810414N06Rik	0	0	0	0	0	0.0028437	0	0.00278616	0	0.00466338	0.00407601	0.00585995	0	0.00228217	0.00308788	0.00895639	0	0	0.00459344	0.0075926	0.00409789	0	0.00157692	0	0.0063673	0.00784841	0.00425572	0.0162202	0.0159109	0.0119783	0	0.00996562	0	0.00712945	0.00129705	0	0	0.015026	0	0.00382872	0	0.0029008	0	0	0.00162543	0	0.00510656	0.00538578	0.00781239
Edem3	0.163145	0.139733	0.0977754	0.116332	0.165015	0.166058	0.140376	0.112284	0.171925	0.133508	0.139336	0.106689	0.118142	0.1101	0.112754	0.196013	0.165804	0.0986336	0.145692	0.109017	0.152398	0.0888686	0.126166	0.127866	0.144766	0.166074	0.152681	0.111734	0.191335	0.16809	0.218686	0.173146	0.113954	0.148247	0.161839	0.163864	0.183431	0.145237	0.205425	0.186045	0.292568	0.0907586	0.175647	0.109919	0.113809	0.342906	0.240918	0.422923	0.378025
1700025G04Rik	0.627372	0.74678	0.616084	0.49293	0.477004	0.359228	0.359164	0.301474	0.159849	0.257788	0.399463	0.306038	0.232575	0.223772	0.263702	0.388591	0.439135	0.305769	0.313437	0.378726	0.303831	0.377521	0.478956	0.315749	0.351081	0.487142	0.413012	0.327776	0.306703	0.277723	0.521474	0.39857	0.483142	0.238995	0.330535	0.57546	0.403454	0.31126	0.270473	0.29018	0.329221	0.310041	0.292661	0.147621	0.239215	0.651811	0.35271	0.535684	0.674156
Gm28610	0	0	0	0	0	0	0	0	0	0	0	0	0	0	0	0	0	0	0	0	0	0	0	0	0	0	0	0	0	0	0	0	0	0	0	0	0	0	0	0	0	0	0	0	0	0	0	0	0
Tsen15	0.457257	0.42037	0.512144	0.386265	0.595764	0.537856	0.360842	0.306122	0.353588	0.464902	0.479101	0.342238	0.346587	0.381702	0.516067	0.569316	0.34747	0.386292	0.293589	0.470159	0.371363	0.387986	0.288672	0.347586	0.339779	0.670235	0.552555	0.563892	0.541227	0.596707	0.785161	0.54488	0.474968	0.478568	0.518541	0.533927	0.374423	0.42185	0.417258	0.484639	0.399938	0.463862	0.419369	0.357348	0.413383	0.459574	0.304779	0.384437	0.271981
Colgalt2	0.118506	0.0569673	0.117606	0.130838	0.12049	0.29918	0.154102	0.116043	0.148225	0.183792	0.0382891	0.0144763	0.00961068	0.0432422	0.0365616	0.220346	0.107056	0.0509724	0.0923982	0.0884645	0.0159929	0.0105175	0.00277556	0.001776	0.00921319	0.356285	0.20761	0.239574	0.369661	0.322062	0.221045	0.256695	0.119513	0.225787	0.204121	0.271606	0.150937	0.101521	0.122063	0.142492	0.156802	0.0800788	0.110436	0.0951429	0.111392	0	0	0	0.000741233
Rgl1	0.514348	0.645971	0.778417	0.614808	0.616949	0.196527	0.268837	0.211862	0.203935	0.228603	0.129125	0.13825	0.144554	0.18673	0.216206	0.225347	0.30255	0.3858	0.336955	0.307751	0.0694984	0.100736	0.139018	0.201628	0.192057	0.326911	0.461654	0.348945	0.389999	0.483144	0.38881	0.632031	0.408601	0.456435	0.458477	0.233523	0.335301	0.344497	0.287025	0.309315	0.136232	0.357165	0.194907	0.21305	0.171126	0.00658215	0	0.0180474	0.00231747
Apobec4	0	0	0	0	0	0	0	0	0	0	0	0	0	0	0	0	0	0	0	0	0	0	0	0	0	0	0	0	0	0	0	0	0	0	0	0	0	0	0	0	0	0	0	0	0	0	0	0	0
Arpc5	0.893259	0.78075	0.780127	0.66096	0.71031	1.00503	0.767616	0.731058	0.617	0.705934	0.746806	0.75012	0.64225	0.752349	0.727583	0.83853	0.508208	0.744176	0.679437	0.822333	0.869723	0.789633	0.925361	0.901478	0.904532	1.09705	0.757498	0.783932	0.825475	0.878983	1.11801	0.761218	1.03345	0.876676	0.835202	0.958695	0.754657	0.714085	0.817026	0.654105	1.56988	0.982727	0.706966	0.766211	0.761884	0.990743	0.711511	0.829527	0.991719
Ncf2	0.00637328	0	0.0129781	0	0.00281513	0.00537666	0.0109727	0.00623157	0	0	0.00400272	0.00128087	0.00190755	0	0.00136076	0	0	0	0	0	0.0043096	0.00419317	0.0188761	0.0108334	0.019257	0.0098396	0.004537	0	0.00488916	0.00294541	0.0073532	0.0221656	0	0	0	0	0.00409427	0	0	0	0.0151682	0	0.00346548	0.00217664	0	0	0	0	0.00195218
Smg7	0.210405	0.345844	0.260901	0.226135	0.13464	0.178625	0.33717	0.336972	0.264038	0.218734	0.20228	0.322686	0.389329	0.249035	0.198906	0.164165	0.356018	0.329169	0.196061	0.168689	0.203934	0.338563	0.402746	0.369274	0.261947	0.217102	0.373201	0.306225	0.262798	0.188641	0.244431	0.269563	0.307592	0.180089	0.202184	0.206551	0.414976	0.372035	0.362786	0.226541	0.179026	0.307523	0.317018	0.222169	0.222723	0.132591	0.357854	0.345902	0.287887
Nmnat2	0	0	0	0	0	0	0.00269862	0	0.00550484	0.00127462	0.000757193	0.00208964	0.00192005	0.00323373	0.00230365	0	0	0	0	0	0	0.00362812	0.00639402	0	0	0.0015539	0	0	0	0	0	0	0.00808622	0	0	0	0	0	0	0.00270273	0.0106704	0	0.00278847	0.0186237	0.00484634	0	0	0	0
Gm28960	0	0	0	0	0	0	0	0	0	0	0	0	0	0	0	0	0	0	0	0	0	0	0	0	0	0	0	0	0	0	0	0	0	0	0	0	0	0	0	0	0	0	0	0	0	0	0	0	0
Lamc2	0.00392186	0	0	0	0	0.0028437	0.00531748	0.000857129	0	0	0.00621223	0.00607663	0.0040041	0	0	0	0	0.00697841	0	0	0.00248295	0.00673437	0.0156293	0.0113515	0.00130172	0.00262354	0.00365549	0.0130524	0.00268255	0	0	0	0	0	0	0.00494427	0.00467988	0	0	0	0.0151127	0	0	0.0010281	0	0	0.00643049	0.00436312	0.00101001
Lamc1	0.629549	0.391834	0.258803	0.338058	0.45965	0.604571	0.372081	0.344069	0.404411	0.410742	0.661158	0.576684	0.555286	0.733208	0.822571	0.644713	0.479017	0.418966	0.502039	0.471602	0.670686	0.566424	0.640113	0.714786	0.863336	0.820992	0.594432	0.615249	0.843246	0.767535	0.902937	0.838767	0.592519	0.632075	0.581378	0.699707	0.377992	0.427798	0.505852	0.478679	0.777158	0.461452	0.425011	0.486348	0.38034	0.791971	0.59693	0.715054	0.581127
Shcbp1l	0	0	0	0	0	0	0	0	0	0	0.0012522	0.00881333	0	0.00411117	0	0	0	0.0062555	0	0	0	0	0	0.00878889	0	0	0	0	0	0	0	0.0147389	0	0	0	0.00184824	0	0	0	0	0.00342707	0	0	0	0	0	0	0	0.00404634
Dhx9	0.995636	0.858452	0.781791	0.552386	0.609067	0.883848	0.690752	0.573594	0.752263	0.497225	0.928146	0.808078	0.766952	0.843753	0.612557	0.718081	0.676273	0.686777	0.765913	0.558365	0.948896	0.895341	0.841168	0.879818	0.608803	0.831481	0.687903	0.611826	0.675956	0.489228	0.883569	0.724496	0.49087	0.692566	0.552501	0.876891	0.778646	0.580021	0.840274	0.614689	0.866246	0.798749	0.64319	0.785969	0.455362	0.898583	1.28295	1.09336	1.07275
Npl	0.0438357	0.00873028	0.0125653	0.0248378	0.0455698	0.00727946	0	0.00401331	0	0.0187902	0.02608	0.00287262	0.00374394	0.0147281	0.0192954	0.0133783	0	0	0.00163899	0.0126217	0.0335067	0.0188495	0.0159107	0.0423571	0.0565557	0.0344697	0.00256094	0	0	0.0239054	0.0233232	0	0	0	0.00629089	0.0250931	0.00390244	0	0.00624995	0.00682161	0.01783	0.00390367	0	0.00942896	0.00979018	0.0555391	0.0104441	0.0132049	0.0149307
Rgs8	0.00149976	0	0	0	0	0.00467528	0	0	0	0.00265283	0.00115826	0	0	0.00292346	0	0	0	0	0	0	0.00287388	0	0	0	0.00194083	0	0	0.00380586	0.00417994	0	0	0.0158247	0	0	0	0.00286591	0	0	0	0	0	0.00470963	0	0	0	0	0	0	0
Gm29529	0	0	0	0	0	0	0	0	0	0	0	0	0	0	0	0	0	0	0	0	0	0	0	0	0	0	0	0	0	0	0	0	0	0	0	0	0	0	0	0	0	0	0	0	0	0	0	0	0
C230024C17Rik	0.00549435	0	0.0114603	0	0	0	0.00261296	0	0.00185033	0	0.00146618	0	0	0.00316056	0.0020628	0	0	0.00395545	0.00296939	0.00249387	0.00981254	0.0022135	0	0.00497562	0.00388167	0.00116337	0.00256094	0.00753082	0	0	0.00516623	0	0	0	0	0.00188132	0	0	0	0	0	0	0	0	0	0	0	0	0.00148055
Rgs16	0.249316	0.245764	0.277428	0.19749	0.0844062	0.0542733	0.0678074	0.168231	0.105145	0.0635035	0.0257412	0.0203489	0.0116746	0.0169841	0.0261513	0.0408049	0.0652696	0.0510879	0.0416275	0.0180554	0.0150634	0.0305282	0.0502574	0.080326	0.018103	0.105956	0.0518745	0.0682441	0.0527348	0.0297462	0.0347875	0	0.0225228	0.0137528	0.0126206	0.0622138	0.0411387	0.0323679	0.010738	0.0775086	0.117099	0.0708653	0.0430643	0.0486797	0.0336285	0	0.0491004	0.0476177	0.0121749
Gm28513	0	0	0	0	0	0	0	0	0	0.00200245	0	0	0	0.00190738	0	0	0	0	0.00721761	0	0.00185066	0	0	0.00573441	0.00194083	0	0	0	0	0	0	0	0	0	0.00167961	0	0	0	0	0	0	0	0	0	0	0	0	0	0
Rnasel	0.193293	0.123835	0.326072	0.20648	0.251466	0.170341	0.138472	0.288005	0.269324	0.258962	0.112386	0.071752	0.112757	0.190362	0.13018	0.142354	0.137384	0.211772	0.163033	0.167025	0.115882	0.0871011	0.167607	0.144123	0.176618	0.179072	0.116526	0.15127	0.180789	0.225485	0.235568	0.206753	0.415427	0.263647	0.228483	0.165577	0.12753	0.144206	0.19489	0.182186	0.170575	0.0938112	0.211531	0.179922	0.188843	0.011703	0.0222623	0.0630634	0.0400351
Rgsl1	0.0039941	0	0	0	0	0.00366563	0	0	0	0.00359985	0.00141876	0	0.00232385	0	0.00120767	0	0.00569174	0	0	0	0	0	0	0	0	0.00220731	0.00625669	0	0	0	0.0073532	0.0133387	0.0118803	0.00406417	0.00691631	0.00593769	0.00271155	0	0	0	0.00263302	0	0.0151827	0	0	0	0	0	0
Teddm2	0.015392	0.0135416	0.00754012	0.0243383	0.010401	0.024616	0.00663074	0.00807712	0.00908026	0.0364335	0.0186296	0.018733	0.00925758	0.00583398	0.0163543	0.0253742	0	0.0165991	0.00364956	0.0226508	0.0159277	0.0240582	0.0092474	0.028436	0.0189175	0.0190587	0.0126395	0.0148859	0.0161388	0.0199744	0.0321639	0.0128066	0	0.078522	0.0178191	0.00629063	0.00602424	0.0132753	0.017944	0.00247049	0.0223876	0.0293936	0	0.0130628	0.0237811	0	0.00765822	0.00377388	0.00971289
Teddm1b	0	0	0	0	0	0	0	0	0	0.00176009	0	0.00198005	0	0.00312695	0	0	0	0	0	0	0	0	0.00237115	0	0	0	0	0	0	0.00185532	0	0	0	0	0	0	0	0	0	0	0	0	0	0	0.00358155	0	0	0	0
Teddm1a	0	0	0	0	0	0	0.00442843	0	0	0	0	0	0	0	0	0	0	0	0	0	0	0	0	0	0	0	0	0	0	0	0	0	0	0	0	0	0	0	0	0	0	0	0	0	0.00577686	0	0	0	0
Glul	1.71365	1.30739	1.12999	1.99282	1.87773	2.77232	1.49756	1.82616	3.33487	3.35608	1.97574	0.903007	0.837298	1.28927	0.998713	2.68451	1.49088	2.11701	3.41434	2.62134	2.29336	0.878066	1.06377	2.43036	1.66343	1.63151	0.885351	1.07847	1.33656	1.20167	2.05473	0.991374	1.49607	2.15875	1.67586	2.33273	1.30705	1.17085	2.17433	1.39863	1.72026	1.10836	1.5019	2.69217	2.74739	0.823952	0.996701	0.762955	1.01118
Gm29290	0.00112681	0.00230832	0	0.0152596	0	0	0	0	0	0	0.00113546	0	0	0	0	0	0	0	0	0	0	0	0	0	0	0.00503512	0	0	0	0	0	0	0	0	0	0.00378718	0	0	0	0	0	0	0	0	0	0	0	0.00665952	0.000866222
Gm29291	0	0	0	0	0	0	0	0	0	0	0	0	0.00290333	0	0	0.00222297	0	0	0	0	0	0	0	0	0	0	0	0	0	0	0	0	0	0	0	0	0	0	0	0	0	0	0	0	0	0	0	0	0
Gm28286	0	0	0	0	0	0	0	0	0	0	0	0	0	0	0	0	0	0	0	0	0	0	0	0	0	0	0	0	0	0	0	0	0	0	0	0	0	0	0	0	0	0	0	0	0	0	0	0	0
A830008E24Rik	0.00466214	0	0	0	0.00370971	0.00256323	0	0.00421727	0.00118935	0.00773794	0.00385582	0.00199691	0.00574435	0.00771412	0.00147641	0.00600543	0	0.0148381	0.00637684	0.013762	0.00891745	0.0052636	0.0060151	0.00888268	0.00355088	0	0	0	0	0	0.00664696	0.0185039	0	0.0173535	0.00359494	0.0106001	0	0.00310242	0	0	0	0	0	0	0	0.00865396	0	0.0146537	0.00770261
Zfp648	0	0	0	0	0	0	0	0	0	0	0	0	0	0	0	0	0	0	0	0	0	0	0	0	0	0	0	0	0	0	0	0	0	0	0	0	0	0	0	0	0	0	0	0	0	0	0	0	0
4930452N14Rik	0	0	0	0	0	0	0	0	0	0	0	0	0	0	0	0	0	0	0	0	0	0	0	0	0	0	0	0	0	0	0	0	0	0	0	0	0	0	0	0	0	0	0	0	0	0	0	0	0
4930532M18Rik	0	0	0	0	0	0	0	0	0	0	0	0	0	0	0	0	0	0	0	0	0	0	0	0	0	0	0	0	0	0	0	0	0	0	0	0	0	0	0	0	0	0	0	0	0	0	0	0	0
Cacna1e	0.00216537	0.00319001	0	0	0.00924248	0	0.00333893	0	0.00279657	0	0	0	0	0	0	0	0	0	0	0	0	0	0.00141119	0	0	0	0.00458282	0	0	0	0	0	0.0208751	0	0	0	0	0.00409949	0.0119555	0	0.0114591	0.0156334	0.0131512	0.0221233	0.00276667	0	0	0	0.00336694
Gm29282	0	0	0	0	0	0	0	0	0	0	0	0	0	0	0	0	0	0	0	0	0	0	0	0	0	0	0	0	0	0	0	0	0	0	0	0	0	0	0	0	0	0	0	0	0	0	0	0	0
Gm9530	0.0134481	0.00977192	0.0230232	0	0.0110611	0.00483546	0.00655475	0.00648713	0.00728466	0.00274602	0.00566936	0.00967341	0.00578622	0.00554154	0	0.00289372	0.0134363	0	0	0	0.00204929	0	0.0066654	0.00755195	0.00305637	0.00529949	0.00279357	0	0.00440288	0	0.0175362	0.0214479	0	0.0117196	0.00746939	0.00428584	0.00577978	0.0152572	0	0.00622861	0.0163503	0	0.00438789	0.0150581	0.00172772	0	0.00438314	0.0062886	0.00346491
Ier5	2.49004	2.61687	3.05454	3.52594	3.78614	1.7378	2.13619	1.67763	1.84825	1.83124	1.18778	1.16636	0.99308	1.08569	1.18775	1.80227	2.16411	2.749	3.08753	2.77943	1.07487	0.959504	1.4332	2.28261	1.72271	1.8169	2.23046	2.37318	2.04745	2.01261	0.591639	0.542449	0.649676	0.346682	0.675718	1.02319	1.3409	1.51067	1.91621	1.40013	2.1192	2.15912	1.45053	1.38559	1.22917	0.314884	0.250412	0.305924	0.181578
Mr1	0.235309	0.259284	0.357418	0.209399	0.198769	0.181933	0.20742	0.142965	0.215583	0.216739	0.248649	0.261464	0.394988	0.294675	0.304155	0.209574	0.191116	0.24953	0.181283	0.146971	0.236676	0.24578	0.277268	0.232414	0.295077	0.145842	0.208993	0.258269	0.198361	0.212933	0.316112	0.373634	0.210093	0.317148	0.219508	0.20008	0.250813	0.208562	0.125604	0.16341	0.186171	0.217136	0.187741	0.207824	0.173121	0.171774	0.139596	0.192322	0.218449
Stx6	0.354091	0.208081	0.249903	0.356734	0.269424	0.295591	0.166731	0.137703	0.215998	0.278634	0.218676	0.219123	0.221318	0.278796	0.285503	0.240476	0.194904	0.195535	0.197434	0.267919	0.299824	0.22315	0.2311	0.26662	0.26311	0.235428	0.234508	0.121963	0.250283	0.215153	0.444991	0.260893	0.105765	0.276392	0.264005	0.26762	0.263146	0.163405	0.185197	0.280316	0.297101	0.205152	0.232645	0.20479	0.219346	0.145215	0.149753	0.209426	0.250516
BC034090	0.144516	0.198934	0.188291	0.0737477	0.134198	0.118268	0.148833	0.0787164	0.0856096	0.0946593	0.137615	0.153137	0.137518	0.0903298	0.122075	0.0924225	0.167717	0.106113	0.10041	0.110099	0.0754644	0.0952628	0.111342	0.113446	0.0493399	0.15418	0.128958	0.171982	0.147105	0.132819	0.244125	0.125919	0.13843	0.0803587	0.0858048	0.140012	0.189479	0.21643	0.0927475	0.166406	0.176995	0.195131	0.202978	0.109106	0.120713	0.190011	0.110648	0.0929786	0.0913775
Gm37622	0	0	0	0	0	0	0	0	0	0	0	0	0	0	0	0	0	0	0	0	0	0	0	0	0	0	0	0	0	0	0	0	0	0	0	0	0	0	0	0	0	0	0	0	0	0	0	0	0
Xpr1	0.21692	0.217868	0.281289	0.42538	0.257165	0.295458	0.394603	0.286973	0.325111	0.190609	0.245889	0.203928	0.199988	0.137964	0.18996	0.34266	0.242121	0.259663	0.259392	0.218506	0.195039	0.207177	0.243795	0.221924	0.245985	0.291236	0.23018	0.184032	0.282	0.157411	0.200745	0.233342	0.264371	0.312087	0.227431	0.223295	0.288698	0.207453	0.279446	0.219243	0.400908	0.319472	0.313637	0.38035	0.234727	0.282697	0.320875	0.394571	0.484984
Gm5532	0	0	0	0	0	0.00213802	0	0	0.010064	0	0.00414822	0	0	0	0.00129691	0	0	0	0	0.00159521	0.00775209	0	0	0.00309127	0.00239622	0.00292686	0	0.0097243	0	0.00473112	0	0	0	0	0	0	0	0	0	0	0.00561614	0	0.00737572	0.00665129	0.00116609	0	0.0098239	0	0
Acbd6	0.73335	0.89797	0.835242	0.864924	0.865431	0.880323	0.762043	0.935026	0.967933	0.936235	0.834356	0.835895	0.890645	0.977243	0.977262	0.811495	0.664912	0.831315	1.00852	0.800293	0.823265	0.729006	0.774235	0.924948	0.920138	0.882932	0.681903	0.776938	0.924814	0.886938	0.824489	0.699202	0.964388	0.928585	0.848871	0.758591	0.663271	0.918467	0.868594	0.890978	0.86158	0.767412	0.90496	1.05782	0.897053	0.937582	0.835386	0.844923	0.731896
Lhx4	0	0	0	0	0.00160043	0	0	0	0	0	0.00123813	0	0.00168911	0	0	0	0	0	0	0	0	0	0	0	0.000865398	0	0	0	0	0	0	0	0	0	0	0	0	0	0	0	0	0	0	0	0	0	0	0	0
Qsox1	0.714651	0.683424	0.806727	0.6414	0.532946	0.87108	0.78583	0.927433	0.810795	0.4804	0.495182	0.55842	0.653881	0.455942	0.435866	0.914124	0.705986	0.602658	0.466572	0.360922	0.439117	0.444234	0.568899	0.592025	0.397303	0.850869	0.912844	1.03371	0.714124	0.559483	0.698994	0.871825	0.942111	0.652113	0.563265	0.724132	0.800284	0.61736	0.563415	0.478063	1.28956	1.44818	1.4577	0.990738	0.64219	0.792623	0.542804	0.519051	0.785623
Gm37571	0	0	0	0	0	0	0	0	0	0	0	0	0	0	0	0	0	0	0	0	0	0	0	0	0	0	0	0	0	0	0	0	0	0	0	0	0	0	0	0	0	0	0	0	0	0	0	0	0
Cep350	0.457177	0.515943	0.457252	0.307267	0.373622	0.35652	0.519741	0.411872	0.423052	0.35516	0.409331	0.402865	0.424739	0.286595	0.282635	0.3868	0.482926	0.489444	0.513437	0.435365	0.4499	0.513635	0.473295	0.38597	0.432125	0.432438	0.437212	0.386069	0.33694	0.329531	0.555863	0.524658	0.468873	0.564968	0.415355	0.459608	0.567124	0.544143	0.484954	0.482818	0.31587	0.423018	0.296991	0.290421	0.323204	0.252389	0.464757	0.495578	0.388644
Tor1aip1	1.19182	1.41653	1.21066	1.10415	1.05569	0.979429	0.799016	0.683344	0.865765	0.757797	0.825995	0.74971	0.851405	0.788265	0.634106	0.945676	0.837065	0.925535	0.98357	0.947073	0.904665	0.783138	1.15481	1.17585	0.847181	0.903648	0.96629	0.903293	0.922428	0.846596	0.927421	0.76871	0.8173	0.84934	0.84936	1.13227	1.11978	1.09912	1.13363	0.761753	0.786065	0.562013	0.600813	0.68165	0.617388	1.83705	1.08026	1.3601	1.56609
Tor1aip2	0.551993	0.529424	0.442182	0.607803	0.443214	0.51385	0.452725	0.441322	0.484705	0.42258	0.574181	0.430645	0.523088	0.484292	0.518196	0.508801	0.443139	0.557721	0.654651	0.406245	0.621641	0.581607	0.512943	0.719682	0.579154	0.570916	0.530239	0.501333	0.692285	0.496026	0.451972	0.308062	0.265666	0.41656	0.311849	0.623053	0.537797	0.544007	0.73766	0.532347	0.437294	0.370322	0.478089	0.493432	0.397694	0.745027	0.893153	1.08088	1.20051
Fam163a	0.00846187	0.00190992	0	0	0	0	0	0	0	0	0.000572216	0	0	0.0141277	0.0010827	0	0	0	0	0	0.00355245	0.00687221	0.00347825	0.0032692	0.00525779	0.00368601	0	0	0.0109182	0.00698585	0	0	0	0.00408719	0	0	0	0	0	0.0047857	0	0	0.00345495	0.0147085	0.00614837	0.0217502	0.00946834	0.0040827	0.0309629
Tdrd5	0.390242	0.340849	0.461052	0.431218	0.587752	0.23713	0.248651	0.307291	0.351757	0.661746	0.39471	0.238854	0.365095	0.395874	0.586855	0.26999	0.190961	0.50004	0.386602	0.639286	0.233375	0.219323	0.240472	0.31477	0.343414	0.0726314	0.0514893	0.124524	0.109865	0.172219	0.30341	0.248651	0.476488	0.471184	0.465437	0.24992	0.216659	0.401605	0.348127	0.437364	0.184895	0.152681	0.145694	0.149725	0.318505	0.444622	0.986195	1.15751	0.250248
4930518J20Rik	0	0	0	0	0	0	0	0	0	0	0	0.0015334	0	0	0	0	0	0	0	0	0	0	0	0	0	0	0	0	0	0	0	0	0	0	0	0	0	0	0	0	0	0	0	0	0	0	0	0	0.000895963
Nphs2	0.0163868	0	0	0	0	0	0	0	0	0	0.00219336	0	0	0.00203037	0.00307391	0	0	0.0081065	0	0	0	0.0028269	0	0	0	0.0093143	0	0.00677606	0.00737055	0	0.00539892	0	0	0.00627888	0	0.00627723	0	0	0	0	0	0.00760058	0	0	0.00199007	0	0.0123304	0	0.00284845
Axdnd1	0.106545	0.0282333	0.0773905	0.0633481	0.00511014	0.0243524	0.00212924	0.0220915	0.0056751	0.00692476	0.0288601	0.00889291	0.024171	0.0317454	0.00759181	0.0240839	0	0.027931	0.0137337	0.0205698	0.0195104	0.0338723	0.015418	0.0567747	0.00519562	0.018345	0.00812248	0	0.0130899	0.00351014	0	0.00686566	0	0.0055687	0.00315211	0.042882	0.0211989	0.020714	0.0100351	0	0.045522	0.065061	0.0165988	0.0291948	0.00456131	0.830305	0.225586	0.0921431	0.13827
Gm2000	0.685998	0.339667	0.483345	0.472666	0.816744	0.754592	0.400582	0.382744	0.431971	0.707826	0.844855	0.440304	0.481365	0.468386	1.00892	0.738631	0.436001	0.350913	0.343954	0.794135	0.774973	0.509573	0.414007	0.480804	0.925163	0.66305	0.41499	0.284822	0.332367	0.759691	0.654022	0.381415	0.560981	0.375474	0.858108	0.678999	0.467462	0.395088	0.395453	0.862287	0.526967	0.260936	0.288457	0.322498	0.676413	0.565226	0.448331	0.379979	0.325022
Soat1	1.95986	1.4154	1.09501	0.974914	1.2555	1.11515	0.954255	0.726094	0.812915	0.923013	1.17172	0.767181	0.877727	0.950439	0.932975	0.697708	0.628221	0.671795	0.780358	0.797041	0.996321	1.0961	0.980097	0.978085	0.986352	0.823562	0.521284	0.696277	0.797194	0.852712	0.874557	0.683738	0.830492	1.00297	0.871899	1.18173	0.914173	0.779305	0.996192	0.885285	1.57241	1.46634	1.06223	1.15865	0.96845	10.36	6.03695	5.38589	11.7748
Gm10031	0.032164	0.0231415	0.0429872	0.00718502	0.0544172	0.00822693	0.00982465	0.013379	0.0156539	0.0382434	0.0185909	0.0336794	0.0292836	0.0345934	0.0400762	0.00966342	0.00433419	0.00929733	0.033003	0.0823714	0.01478	0.0236213	0.00830265	0.0158017	0.040748	0.0229528	0.0168158	0.0110464	0.0211637	0.0267715	0.0117929	0.0372145	0.0334194	0.028754	0.0530919	0.0253101	0.0255007	0.0279453	0.0538872	0.0272326	0.0299519	0.0242854	0.0674111	0.0317348	0.0249604	0.0284456	0.0176439	0.0357036	0.0261435
Abl2	0.232238	0.222632	0.200275	0.171875	0.16045	0.117299	0.188909	0.163862	0.220058	0.156218	0.136586	0.191847	0.209925	0.164499	0.196272	0.14609	0.214233	0.255394	0.217127	0.199645	0.140121	0.16784	0.198729	0.182864	0.164171	0.134163	0.20765	0.228618	0.137736	0.203322	0.0985534	0.348673	0.232301	0.165199	0.153574	0.140208	0.18043	0.174958	0.230726	0.172478	0.194015	0.245215	0.237363	0.133567	0.121759	0.214705	0.222619	0.386731	0.198094
Tor3a	0.0977479	0.120141	0.126044	0.0395819	0.173896	0.0611273	0.0596382	0.0706209	0.0722187	0.102211	0.0562947	0.0499009	0.097141	0.0674464	0.098742	0.0400841	0.0319968	0.0963719	0.103044	0.114847	0.046761	0.0857053	0.0866127	0.114279	0.139191	0.0856337	0.0850915	0.138897	0.0906832	0.162415	0.0737402	0.132827	0.07828	0.0796416	0.123398	0.0559039	0.0578206	0.0902485	0.115322	0.1488	0.0604755	0.0542212	0.0601139	0.0967845	0.124963	0.00826679	0.063588	0.0652996	0.0545136
Fam20b	0.16364	0.155164	0.130989	0.161619	0.21489	0.168968	0.136551	0.0774481	0.133482	0.161814	0.150696	0.124793	0.133106	0.185974	0.150134	0.191844	0.157818	0.0880256	0.122879	0.158293	0.132285	0.134897	0.119777	0.187185	0.13227	0.172395	0.116818	0.155443	0.14153	0.167388	0.158968	0.178315	0.214621	0.214659	0.202789	0.15797	0.148096	0.0734539	0.205029	0.163099	0.164974	0.0961377	0.110352	0.154581	0.105465	0.164132	0.227284	0.250094	0.292888
Ralgps2	0.852049	1.06804	0.806106	0.905866	0.662604	1.2927	1.47734	0.922084	0.741168	0.852998	1.64426	1.1293	0.944972	0.947709	1.00938	1.31203	1.05474	0.668949	0.532358	0.518796	1.57269	0.867562	0.469318	0.574573	0.572052	0.647131	0.71274	0.447186	0.291537	0.278728	1.06284	0.959277	0.779605	0.481096	0.552039	1.5132	1.41644	0.800671	0.748024	0.846355	1.19597	1.1413	0.958655	0.814172	0.840389	1.39674	1.94032	2.29701	1.02228
Angptl1	0.379949	0.328817	0.378149	0.323364	0.314103	0.489634	0.212515	0.18331	0.173434	0.150582	0.036843	0.0248205	0.0317504	0.0335081	0.0203472	0.0780032	0.183276	0.043157	0.0516024	0.0711952	0.00875128	0.0198369	0.0247712	0.0214069	0.00509809	0.58398	0.448758	0.352159	0.310805	0.308857	0.340228	0.330511	0.247427	0.198374	0.197632	0.244175	0.328245	0.184516	0.1914	0.35002	0.346082	0.348955	0.282862	0.242241	0.169152	0.118555	0.0225862	0.119737	0.122509
4930439D14Rik	0	0	0	0	0	0.00306663	0.00165108	0	0	0	0	0.00139103	0	0	0	0	0.00546817	0	0	0	0	0	0	0	0	0.00299203	0	0	0	0	0	0.00914578	0	0	0.00100477	0	0	0	0.00649347	0	0.00309409	0	0	0.00349044	0.00331566	0	0	0	0.00231983
Gm28694	0	0	0	0	0	0.00455283	0	0	0	0	0	0.00288199	0	0	0.00441649	0	0	0	0	0	0	0	0	0	0	0	0	0	0	0	0	0	0	0	0	0	0	0	0	0	0	0	0	0	0	0	0.00410401	0.0179181	0.000880712
Tex35	0	0	0	0	0	0	0	0	0	0	0	0	0	0	0	0	0	0	0	0	0.00287107	0.00213118	0	0	0	0	0	0	0	0	0	0	0.0118156	0	0	0	0	0	0	0	0	0	0	0.00228332	0	0	0	0	0
Rasal2	0.131719	0.0849028	0.116448	0.0677662	0.0666225	0.203944	0.150518	0.168932	0.1423	0.0963888	0.125366	0.0836756	0.108251	0.127265	0.0856969	0.101743	0.0549464	0.0985508	0.133656	0.096358	0.12474	0.117855	0.150247	0.168011	0.0958395	0.111295	0.119719	0.0731723	0.116036	0.0697926	0.127182	0.0615781	0.0766071	0.191934	0.0869566	0.139874	0.0647828	0.038786	0.0981143	0.0781074	0.364281	0.356075	0.257832	0.339065	0.200162	0.127812	0.0853446	0.113226	0.111239
Cryzl2	0.119781	0.16239	0.250348	0.166448	0.139285	0.155174	0.180339	0.247095	0.136335	0.142835	0.195778	0.223075	0.288706	0.2153	0.20632	0.187391	0.14739	0.173629	0.133502	0.148685	0.230114	0.309894	0.305519	0.214117	0.199417	0.211328	0.241518	0.34709	0.218903	0.22293	0.138499	0.279482	0.336279	0.187784	0.204898	0.246585	0.187799	0.256665	0.158194	0.121935	0.156512	0.125532	0.224115	0.155869	0.124287	0.205632	0.309115	0.408225	0.494971
Gm15486	0	0	0	0	0	0	0	0	0	0	0.00169941	0	0.00209368	0	0.00133535	0.00452653	0	0	0	0	0	0.00217364	0	0	0	0	0	0	0	0	0	0	0	0	0	0	0	0	0	0	0	0	0	0	0	0	0	0	0
Sec16b	0.0489925	0.0185401	0.0365559	0.0039837	0.0358199	0.029625	0.0131875	0.0462698	0.0569378	0.044967	0.0801714	0.0621491	0.0834086	0.0552305	0.0930559	0.0720726	0.0229902	0.0600158	0.0808525	0.0654402	0.101928	0.058318	0.0634331	0.10077	0.109652	0.0609962	0.0353037	0.0376426	0.0774915	0.0801551	0.156087	0.0804768	0.0725038	0.0609067	0.0723578	0.052348	0.0552704	0.0280397	0.04306	0.051308	0.0170811	0.00910062	0.0204684	0.0215308	0.0300097	0.0191525	0.0155322	0.0264464	0.0145735
Brinp2	0.00152169	0	0	0	0	0.0225622	0	0	0	0	0	0	0	0	0	0	0	0	0	0	0	0	0	0	0	0	0	0	0	0	0	0	0	0	0	0	0	0	0	0.00295582	0.0147429	0	0.00289285	0.00596818	0.00529087	0	0	0	0
Astn1	0	0	0	0	0	0	0	0	0.0216827	0.0185639	0	0	0	0	0	0	0	0	0	0	0	0	0	0	0	0	0	0	0.00368528	0	0	0	0	0	0	0	0	0	0	0.00260574	0.0654863	0	0.0192444	0.0686021	0.0190975	0	0	0	0.00117134
Gm37679	0	0	0	0	0	0	0	0.00795118	0	0	0	0	0	0	0	0	0	0	0	0	0	0	0	0	0	0	0	0	0	0	0	0	0	0	0	0	0	0	0	0	0.0102885	0	0	0.00735968	0	0	0	0	0
Pappa2	0	0.00485602	0	0	0	0.00279618	0.00770964	0.00477042	0.00506748	0.01089	0.00121989	0	0	0.00198776	0	0	0.00552465	0.00763776	0.0205912	0.0235417	0	0	0	0.00192728	0.00517359	0	0.00378174	0	0.00813796	0.00950234	0.0498843	0.00857615	0	0.0112479	0.00512425	0	0	0.0194986	0.016113	0.00439005	0	0.00459143	0.00516102	0	0	0	0	0	0
1600012P17Rik	0	0	0	0	0	0	0	0	0	0	0	0	0	0	0	0	0	0	0	0	0	0	0	0	0	0	0	0	0	0	0	0	0	0	0	0	0	0	0	0	0	0	0	0	0	0	0	0	0
4930562F17Rik	0	0	0	0	0	0	0	0	0	0	0	0.00220586	0	0	0	0	0	0	0	0	0	0	0	0	0	0	0	0	0	0	0	0	0	0	0.00283631	0	0	0	0	0	0	0	0	0	0	0	0	0	0
Cop1	0.784253	0.757103	0.720218	0.83373	1.01919	0.971053	1.0964	0.942684	1.30149	1.2916	0.730665	0.606147	0.606714	0.792434	0.76381	0.785559	0.819392	0.842017	1.39914	1.43689	0.634976	0.610238	0.725091	0.868309	0.713084	0.909409	0.726257	0.773036	0.907124	0.974267	0.973404	1.13416	1.34504	1.49498	1.24877	0.924419	1.06112	1.05293	1.48451	1.21264	0.695047	0.665832	0.624875	0.66809	0.810445	0.586631	0.563325	0.561539	0.531889
Tnr	0	0	0	0.00546863	0	0	0.0124473	0.00438383	0.00471113	0.00164458	0.00951658	0.00285169	0.0103146	0.00256515	0.0125294	0.00225783	0	0.015693	0.0227146	0.0156378	0.0151675	0.00967199	0.0210421	0.0149504	0.0143004	0.00220334	0	0	0	0.00432495	0	0	0	0.0091561	0.00205248	0.00497959	0	0.0039366	0.0131665	0.00344666	0.00211701	0	0.0037611	0.00823123	0.00166234	0	0	0	0.00151953
Gm38039	0.00165383	0	0	0	0	0	0	0	0	0	0	0	0	0	0	0	0	0	0	0	0	0	0	0	0	0	0	0	0	0	0	0	0	0	0	0	0	0	0	0	0	0	0	0	0	0	0	0	0
Gm37294	0	0	0	0	0	0	0	0	0.00140476	0	0	0	0	0	0	0	0	0	0	0	0	0	0	0	0	0	0	0	0	0	0	0	0	0	0	0	0	0	0	0	0	0	0	0	0	0	0	0	0
4930523C07Rik	0.339915	0.462822	0.427316	0.785314	0.478142	1.70484	1.35721	1.55221	2.72467	2.14887	0.326155	0.199042	0.271561	0.441757	0.167325	0.458348	0.56955	0.771174	1.36229	1.09477	0.46491	0.39126	0.595583	0.881116	0.589179	0.364378	0.402632	0.442253	0.592169	0.381876	0.381157	0.414788	0.526014	0.978287	0.611334	0.476004	0.380091	0.435984	1.10443	0.611194	2.87276	1.96375	2.17386	2.81039	2.3996	0.0495372	0.0222309	0.0954317	0.074773
4930562F07Rik	0.00263291	0.00401387	0.00676331	0.0244446	0	0.0160672	0.00146388	0.0167823	0.0171175	0.0036118	0	0	0.00237316	0.00299204	0.00164708	0	0	0	0.00227575	0.00458486	0	0	0.00204844	0	0	0.00247145	0.00375036	0	0	0	0	0	0	0	0.00202791	0.00259407	0	0	0	0	0.0144061	0.0390726	0.00573658	0	0.0149405	0	0	0	0.000926911
Tnn	0	0.00958746	0	0.0167449	0	0.00239203	0.012107	0	0.00872869	0.0028442	0	0	0	0.00357066	0	0	0.00420942	0	0.00671042	0.00597643	0	0	0	0	0	0.00343476	0.00816344	0	0.0109444	0	0	0	0	0	0	0.00231977	0	0	0	0	0	0	0	0	0.0033548	0	0	0	0
Mrps14	0.896176	0.755999	0.846999	0.911785	1.24573	0.909978	0.754226	0.691997	0.950598	1.21484	1.11534	1.00075	1.01015	1.16196	1.29851	0.840483	0.70474	0.670341	0.72607	1.12091	1.10957	1.01559	0.886916	0.950032	1.36242	1.04616	0.802122	0.855383	0.930469	1.32527	1.08445	1.16984	0.907977	1.1623	1.19616	0.807542	0.649474	0.633755	0.620783	0.986338	0.986072	1.06291	0.886298	1.3055	1.39446	1.33666	1.11216	0.982435	1.42334
Cacybp	1.12815	1.27728	1.10562	0.967489	1.54325	1.14048	1.30384	0.932634	1.0961	1.54657	1.31809	1.40959	1.16854	1.38978	1.52513	1.01622	0.975086	0.809253	0.861277	1.64346	1.20097	1.47061	1.02904	1.22787	1.37949	1.23353	1.3608	0.907828	1.07565	1.47822	1.36992	1.33255	0.997426	1.20058	1.43989	1.1406	1.13425	1.10522	0.939272	1.30047	1.35176	1.3039	1.23117	1.23204	1.55351	1.50978	1.09448	1.17295	1.315
Rabgap1l	0.65548	0.628567	0.413454	0.625984	0.556812	1.23455	1.06593	0.715019	1.22756	1.15936	1.00582	0.663027	0.605494	0.754992	0.771721	1.21036	0.880857	0.528939	0.653957	0.881912	0.772164	0.346562	0.215961	0.347434	0.436556	0.967272	0.565816	0.424904	0.609564	0.685985	1.17782	0.971496	0.660479	0.826096	0.797862	1.12362	0.831189	0.554109	0.660406	0.928765	0.850744	0.516943	0.547549	0.814817	0.784453	0.318952	0.103602	0.126779	0.0836877
Gm36975	0.00144844	0	0	0	0	0	0	0	0	0	0.00198962	0	0	0	0	0	0	0	0	0	0	0	0	0	0	0	0	0	0	0	0.00706518	0	0	0	0.00168957	0	0	0.0076376	0	0	0	0	0	0	0.00335763	0	0	0	0
Gm37083	0	0	0	0	0.00312238	0.00431649	0	0	0	0	0	0	0	0	0	0	0	0	0	0	0	0	0	0	0	0	0	0	0	0	0	0	0	0	0	0	0	0	0	0	0	0	0	0	0	0	0	0	0
Gm38060	0	0	0	0	0	0	0	0	0	0	0	0	0	0	0	0	0	0	0	0	0	0	0	0	0	0	0	0	0	0	0	0	0	0	0	0	0	0	0	0	0	0	0	0	0	0	0	0	0
Rc3h1	0.574662	0.621699	0.396846	0.584224	0.567431	0.50131	0.461083	0.391848	0.642126	0.459799	0.423653	0.397384	0.374285	0.479482	0.411078	0.45578	0.61891	0.605488	0.769595	0.617074	0.378308	0.399946	0.502759	0.666401	0.487469	0.487968	0.405776	0.500495	0.610383	0.437495	0.501027	0.696038	0.56852	0.66503	0.521111	0.457407	0.595907	0.480177	0.701925	0.593031	0.451674	0.372956	0.367751	0.461336	0.459909	0.470951	0.486703	0.458708	0.521775
Serpinc1	0.0557257	0.0669588	0.0532358	0.0427277	0.011593	0.072695	0.0504669	0.0587598	0.0764616	0.0101279	0.0334375	0.0480125	0.0567099	0.0430937	0.0246346	0.0640576	0.0142168	0.0848127	0.0657211	0.0223558	0.0752031	0.0601629	0.0438919	0.0830281	0.0294614	0.0477189	0.0541327	0.0732479	0.0334587	0.0114058	0.064964	0.091111	0.0215488	0.0083157	0.00942792	0.0544594	0.0695287	0.0565669	0.0501365	0.019954	0.0321014	0.0331527	0.0372783	0.0373758	0.0200713	0.0178806	0.0340832	0.0231224	0.0193789
Zbtb37	0.159702	0.142746	0.112462	0.253776	0.180213	0.203158	0.129912	0.133016	0.239982	0.243014	0.150914	0.0783742	0.100434	0.157395	0.174583	0.161541	0.15028	0.179153	0.280163	0.303448	0.140114	0.11494	0.132027	0.266225	0.212942	0.178763	0.0818992	0.182046	0.193495	0.176591	0.226384	0.200886	0.338583	0.412633	0.211532	0.181982	0.128873	0.135391	0.130045	0.162763	0.1546	0.129631	0.0872848	0.151155	0.2138	0.120482	0.124231	0.137463	0.165781
Gm37362	0.00351844	0.00536207	0	0	0	0.00245121	0	0	0	0	0	0	0.00154574	0	0	0	0	0	0.00364097	0	0	0.00714771	0.0057777	0.00507319	0	0	0	0	0	0	0	0	0.0059038	0	0	0.00200292	0	0	0	0	0.00327797	0	0	0	0	0	0	0	0
Dars2	0.0424906	0.0291761	0.0375268	0.0274765	0.0417399	0.00809147	0.0101956	0.0192458	0.0243201	0.0351413	0.0417725	0.0190485	0.0205674	0.0119907	0.0477266	0.0274798	0.0215546	0.0160372	0.0373593	0.027984	0.0238769	0.0109695	0.0241621	0.0525013	0.0284794	0.0352874	0.0210151	0.0238357	0.0549157	0.0383722	0.0503234	0.0132153	0.0121209	0.0514962	0.0237205	0.0394696	0.0475296	0.0126277	0.0248415	0.0307394	0.0344531	0.0097549	0.0199517	0.0350726	0.0171603	0.0191581	0.0483932	0.0536466	0.0700224
Gm37634	0.00373368	0.0369023	0.00958484	0.00661216	0	0.0054017	0.00250736	0.00649306	0.0140343	0.00233092	0.00778438	0.00598006	0.00189824	0	0.00242123	0.00363875	0.0218406	0	0.00380636	0.00488535	0.00475569	0.0125631	0	0.00187199	0.00321308	0.00213424	0.00838045	0	0.0104495	0	0.00862057	0.0147656	0.0132832	0	0	0.00785006	0.00583702	0	0	0	0	0.0419389	0.0137138	0.00827198	0.00358735	0	0	0	0.00288579
Cenpl	0.0200668	0.0495386	0.0838318	0.0474416	0.0365505	0.0578417	0.0287908	0.0588236	0.0493603	0.0254068	0.018245	0.0268304	0.0724658	0.0321295	0.0142606	0.0144064	0.0519716	0.0970143	0.0479824	0.0484356	0.0283504	0.0467738	0.111628	0.176084	0.0355334	0.0286059	0.0398029	0.0708503	0.0813043	0.0294333	0.0348483	0.0753128	0.0569103	0.00710139	0.0426533	0.00606477	0.0390012	0.044669	0.0341434	0.0176186	0.0141945	0.0417585	0.0447758	0.0380073	0.017657	0.0158124	0.0392046	0.018964	0.0225874
Klhl20	0.113676	0.0536679	0.0264108	0.103904	0.120899	0.0859787	0.0587086	0.0545556	0.0651182	0.107005	0.0780643	0.0833278	0.05816	0.0784319	0.105912	0.101566	0.0497636	0.0486682	0.097146	0.123708	0.0789636	0.0894828	0.0944408	0.174756	0.0935426	0.138916	0.0735505	0.0383364	0.110887	0.104565	0.196877	0.140188	0.0582449	0.150394	0.129884	0.108156	0.0641248	0.0460136	0.0815024	0.0788092	0.091191	0.0942946	0.0904382	0.0750165	0.0847158	0.0377854	0.0855463	0.0518697	0.0721762
Ankrd45	0	0.00324977	0	0	0	0	0	0	0	0.00218559	0.00139561	0	0	0	0	0	0	0	0	0.0079508	0.00444837	0	0	0	0	0	0	0	0	0	0	0	0	0	0	0	0	0	0	0	0.00601921	0.00495237	0	0.00172353	0	0	0	0	0.0015046
Tex50	0	0	0	0	0	0	0	0	0	0	0	0	0	0	0	0	0	0	0	0	0	0	0	0	0	0	0	0	0	0	0	0	0	0	0	0	0	0	0	0	0	0	0	0	0	0	0	0	0
Prdx6	1.30777	1.57269	1.76695	1.54694	1.53807	1.12775	1.07608	1.15033	1.04276	1.10435	0.938647	1.4455	1.31834	0.993619	0.864199	0.919509	1.0937	1.13187	0.999986	0.83718	0.801005	1.32634	1.03618	0.685352	0.589124	1.06161	1.34112	1.39558	1.15872	0.942192	1.01755	1.08246	1.05242	0.87558	0.950988	1.01109	1.31987	1.22773	1.048	0.981941	1.03394	1.05183	1.19254	0.986022	0.908427	1.5214	2.07834	2.47152	2.84191
Tnfsf4	0	0	0	0	0	0	0	0	0	0	0.00104518	0	0	0	0	0	0	0	0	0	0	0	0	0	0	0	0	0	0	0	0	0	0	0	0	0	0	0	0	0	0	0	0	0	0	0	0	0	0
Tnfsf18	0	0	0	0	0	0	0	0	0	0	0	0	0	0	0	0	0	0	0	0	0	0	0	0	0.00224096	0	0	0	0	0.00147443	0	0	0	0	0	0	0	0	0	0.00250314	0	0	0	0	0	0	0	0	0
Fasl	0	0	0.00861767	0	0	0.00278249	0	0	0	0	0.00113971	0	0	0	0	0	0	0	0	0.00593405	0	0	0.00142111	0	0	0	0	0	0	0	0	0	0	0	0	0	0	0	0	0	0	0	0	0	0	0	0	0	0
Suco	0.477813	0.494781	0.434403	0.415697	0.365037	0.489246	0.421931	0.409082	0.482957	0.358401	0.398183	0.31507	0.349682	0.40155	0.220904	0.411518	0.33667	0.327317	0.442664	0.27392	0.409313	0.432997	0.420415	0.393816	0.340839	0.375956	0.423184	0.34992	0.364419	0.266607	0.441548	0.343849	0.331958	0.373995	0.324325	0.430255	0.550806	0.3884	0.441624	0.333218	0.455526	0.441203	0.480835	0.437742	0.353655	0.605748	0.523402	0.552437	0.409257
Gm31925	0	0	0	0	0	0	0	0	0	0	0	0	0	0	0	0	0	0	0	0	0	0	0	0	0	0	0	0	0	0	0	0	0	0	0	0	0	0	0	0	0	0	0	0	0	0	0	0	0
4930558K02Rik	0	0.00215766	0	0	0	0.0063446	0	0	0	0	0.0022379	0.00158687	0	0	0	0	0.00402161	0.00424327	0.0053632	0	0	0	0	0	0	0	0	0	0	0	0	0.0206289	0	0	0.00207766	0	0	0	0	0	0.00322265	0	0	0.00511403	0	0	0.007718	0	0.00166019
Pigc	0.170433	0.114844	0.0981547	0.163714	0.165367	0.17045	0.0781367	0.11846	0.0815487	0.13614	0.0924991	0.05729	0.0824197	0.0952962	0.192554	0.178981	0.119878	0.0841002	0.136267	0.24572	0.105682	0.0819895	0.116709	0.108509	0.203808	0.148002	0.120646	0.139666	0.0993265	0.191673	0.176785	0.195403	0.128411	0.208485	0.209475	0.0772883	0.081373	0.117856	0.122319	0.162588	0.162491	0.114121	0.117857	0.112517	0.109577	0.113255	0.0636188	0.0750531	0.0966569
Gm38304	0	0.0101965	0	0	0	0	0	0	0	0	0	0	0	0	0	0	0	0	0	0.00580362	0	0	0.00227426	0	0	0	0	0.0049318	0	0.00427468	0	0	0	0	0	0	0	0	0	0	0	0	0	0	0	0	0	0	0.000918026
Dnm3	0.409868	0.343733	0.312478	0.300266	0.293009	0.338845	0.161903	0.185318	0.162897	0.11035	0.276007	0.142556	0.199089	0.282132	0.182578	0.464872	0.156065	0.26636	0.324657	0.252908	0.159151	0.0556621	0.151698	0.321501	0.186253	0.491334	0.277518	0.279974	0.249644	0.237587	0.396525	0.421628	0.386193	0.284343	0.311028	0.67416	0.313957	0.328153	0.269423	0.247768	0.0544053	0.0413881	0.0631585	0.0806388	0.0651684	0.309544	0.205108	0.204816	0.341045
2810442N19Rik	0.00184861	0.00235487	0	0	0	0	0	0	0.00263395	0.00094079	0.00340737	0	0	0.00306861	0.00136409	0.00218663	0	0	0	0	0	0	0.00941237	0.00644323	0.00252088	0	0.00213865	0	0	0	0	0	0.0103238	0	0.00458508	0.00610911	0	0.00646053	0	0	0	0	0	0.00318809	0	0	0	0	0.00258918
Dnm3os	0.343558	0.272461	0.232442	0.207849	0.23614	0.384212	0.272423	0.320711	0.300902	0.164593	0.466476	0.401787	0.439043	0.547048	0.286701	0.743788	0.590134	0.648217	0.591178	0.352772	0.533269	0.521262	0.789581	0.771768	0.62137	0.566975	0.329092	0.474215	0.325133	0.208174	0.791657	0.455	0.55435	1.08233	0.675946	0.368611	0.427789	0.391057	0.505372	0.30936	0.199629	0.124201	0.205967	0.145516	0.0540818	0.0408145	0.0642225	0.0709758	0.0208699
Mettl13	0.0503927	0.0692452	0.0954836	0.0215508	0.0748625	0.0905928	0.0896408	0.101328	0.0934843	0.0570846	0.0810423	0.0847693	0.0479532	0.0735528	0.0839767	0.0701556	0.0424979	0.063898	0.106146	0.0554408	0.0768479	0.0867081	0.0741076	0.0564975	0.0659926	0.0552633	0.130908	0.0679142	0.0408888	0.105474	0.116645	0.0845739	0.173938	0.0487938	0.0581645	0.0458645	0.0752337	0.0397436	0.038245	0.0625609	0.0554534	0.097806	0.0509038	0.0846363	0.049212	0.0259402	0.0627414	0.12424	0.0938344
Vamp4	0.375814	0.357161	0.423712	0.449563	0.505413	0.275571	0.175468	0.262542	0.361805	0.456701	0.299248	0.274342	0.288305	0.203783	0.294765	0.371457	0.234587	0.285103	0.281949	0.400182	0.270385	0.286127	0.251118	0.231617	0.411841	0.344301	0.306323	0.304661	0.287227	0.402385	0.460455	0.317983	0.436146	0.350177	0.4688	0.364346	0.308149	0.279125	0.208392	0.362663	0.476806	0.236562	0.329855	0.445202	0.57518	0.251229	0.197257	0.238664	0.230192
Myoc	0.0335205	0.0414314	0.0374714	0.0170283	0.0616969	0.224219	0.172682	0.228795	0.496214	0.679534	0.00151666	0	0	0.0132151	0.00836038	0.00996975	0.0504727	0.00488037	0.0100017	0.0217611	0	0.00982935	0.0477356	0	0	0.0391417	0.0823312	0.0925833	0.0523297	0.00739383	0.0338874	0.039804	0.0771632	0.0262373	0.0346907	0.00882397	0.0447894	0	0	0.00902983	1.96593	0.539984	2.04302	2.60493	1.5546	0	0	0	0
Myocos	0	0	0	0	0	0	0.00237631	0.00183412	0	0	0.00118729	0.00452938	0	0	0	0	0	0	0	0	0	0.00204299	0	0	0	0.00141694	0.00378083	0	0	0	0	0	0	0	0	0	0.00271155	0	0.0069304	0	0	0	0	0	0	0	0	0	0
Prrc2c	4.06723	4.84702	3.58176	3.40574	2.96415	3.60927	3.77121	3.25869	3.21061	2.40174	3.45313	3.79155	3.48251	3.38938	2.53778	3.40686	3.5161	3.22972	3.37465	2.58632	3.73534	4.25433	3.72444	3.70547	2.74922	3.41891	3.77347	3.18786	3.10978	2.65945	3.17375	3.57889	3.46739	3.37251	2.51487	4.1659	4.38801	3.59921	3.92156	2.59456	3.09719	3.81687	3.1532	2.87113	2.28643	3.23732	3.9528	3.82561	3.34719
Fmo4	0.00438874	0.00324427	0	0.00764091	0	0	0	0	0.00245599	0.000599342	0.0016627	0	0	0	0	0	0	0	0	0	0.00223964	0	0	0	0	0.00686981	0	0	0	0.00285373	0	0	0	0	0	0	0	0	0	0	0	0	0	0	0	0	0.00536887	0.00865561	0.00373769
Fmo1	0.434482	0.241763	0.210749	0.101066	0.118173	0.103411	0.0605238	0.0750301	0.0735568	0.112426	0.155005	0.0700865	0.148707	0.113855	0.0934424	0.183872	0.141941	0.111392	0.107177	0.126147	0.176908	0.143142	0.231086	0.225812	0.231131	0.155907	0.124624	0.257978	0.147413	0.1368	0.230533	0.0930459	0.166276	0.107692	0.172234	0.147661	0.0527141	0.0748031	0.0630499	0.0476039	0.0552148	0.0897564	0.152285	0.0649423	0.0716701	0.00345975	0	0.0213661	0.00990622
Fmo2	0.371832	0.506998	0.359727	0.243163	0.121385	0.00969874	0.0283217	0.0339465	0.0746913	0.0552927	0.0264116	0.0204653	0.00548888	0.00722946	0.00945783	0.0518362	0.0679427	0.0775088	0.0727849	0.0258146	0.0138348	0.0095224	0.0297655	0.0406312	0.0222525	0.0765904	0.0643742	0.124149	0.0868173	0.0571797	0.132965	0.0915114	0.0866369	0.0733556	0.0162801	0.023491	0.0145942	0.00808827	0	0.0157677	0.0112139	0.00970807	0.0435905	0.0138196	0.0207666	0.00774473	0.0255957	0.00675201	0.000850415
Fmo6	0	0	0	0	0	0	0	0	0	0	0	0	0.00245223	0	0	0	0	0	0	0	0	0	0	0	0	0	0	0	0	0	0	0	0	0	0	0	0	0	0	0	0	0	0	0	0	0	0	0	0
Fmo3	0	0	0	0	0	0	0	0	0	0	0	0	0	0	0	0	0	0	0	0	0	0	0.00340534	0	0	0	0	0	0	0	0	0	0	0	0	0	0	0	0	0	0	0	0	0	0	0	0	0	0
Gm37273	0	0	0	0	0	0	0	0	0	0	0	0	0	0	0	0	0	0	0	0	0	0	0	0	0	0	0	0	0	0	0	0	0	0	0	0	0	0	0	0	0	0	0	0	0	0	0	0	0
Mroh9	0	0	0	0	0	0	0	0	0	0	0	0	0	0	0	0	0	0	0	0	0	0	0	0	0	0	0	0	0	0	0	0	0	0	0	0	0	0	0	0	0	0	0	0	0	0	0	0	0
Prrx1	1.10363	1.03621	0.788638	1.08137	0.982059	0.713217	0.64659	0.668078	0.901718	0.715134	0.500088	0.366802	0.2956	0.354557	0.390375	0.607707	0.504038	0.729757	0.631995	0.658848	0.595395	0.734084	0.98948	0.901737	0.961646	0.639643	0.478622	0.552881	0.684231	0.595789	0.890591	0.972579	0.773694	1.07976	0.736023	0.5884	0.527076	0.396517	0.560483	0.607158	1.47177	1.14254	0.819608	1.16681	0.767454	0.352383	0.184987	0.13094	0.0842895
Gm20471	0	0.00197731	0	0	0	0	0	0	0	0	0	0	0	0	0	0	0	0	0	0	0	0	0.00164605	0	0.00106867	0	0	0	0	0	0	0	0	0	0	0	0	0	0	0	0	0	0	0	0	0	0	0	0
Gm26523	0.0486396	0.0207714	0	0	0.0241431	0.0161759	0.0110557	0.00800788	0.0116881	0.0115407	0.0210005	0.00855025	0.00598093	0.00893582	0.0103931	0.00873617	0.0178692	0.00737794	0.010732	0.0327293	0.0101714	0.0122664	0.0102197	0.0120809	0.0245032	0.0278194	0.0102743	0	0.0340256	0.00311154	0.0332773	0.0108164	0.0517225	0.0151547	0.0429848	0.0234986	0.0192445	0.0129692	0.00830321	0.00414656	0.112221	0.0031652	0.00338112	0.0322192	0.0221274	0.0274374	0.0301405	0	0.00265221
Gorab	0.113446	0.0556623	0.155802	0.122111	0.186186	0.0811059	0.0705986	0.149597	0.0569919	0.137711	0.0890539	0.0578999	0.0758432	0.0868018	0.130697	0.0988804	0.104248	0.113376	0.119316	0.158095	0.0862804	0.0445591	0.105868	0.0944171	0.124365	0.0805773	0.108983	0.0653539	0.0773871	0.144675	0.0957906	0.184191	0.123305	0.149034	0.177396	0.0741753	0.0591931	0.0766976	0.0645247	0.0746049	0.113585	0.0322323	0.0679537	0.0658387	0.0973104	0.137664	0.11148	0.101098	0.0951165
Gm29500	0	0	0	0	0	0	0	0	0	0	0	0	0	0	0	0	0	0	0	0	0	0	0	0	0	0	0	0	0	0	0	0	0	0	0	0	0	0	0	0	0	0	0	0	0	0	0	0	0
Mettl11b	0	0	0	0	0	0	0	0	0	0	0	0	0	0	0	0	0	0	0	0	0	0	0	0	0	0	0	0	0	0	0	0	0	0	0	0	0	0	0	0	0	0	0	0	0	0	0	0	0
Kifap3	0.554086	0.781012	0.541908	0.353478	0.628946	0.644319	0.627457	0.493449	0.454154	0.561353	0.552706	0.505155	0.536132	0.403855	0.483928	0.460927	0.569205	0.522902	0.438973	0.5825	0.542518	0.658505	0.539317	0.483419	0.63443	0.596223	0.650264	0.51183	0.400929	0.481046	0.624308	0.578371	0.469457	0.339486	0.55279	0.564659	0.669995	0.575984	0.554182	0.599347	0.625073	0.577988	0.59642	0.362705	0.5541	0.322904	0.401716	0.337902	0.245136
Scyl3	0.0613697	0.0684532	0.0682132	0.0693809	0.0742401	0.0716675	0.0458081	0.0618881	0.0466215	0.0773203	0.0517936	0.0460221	0.0448503	0.0657323	0.0664391	0.0548877	0.0722117	0.043632	0.062533	0.0797831	0.0607603	0.0484872	0.0574721	0.0690255	0.108022	0.0634666	0.0363866	0.0407359	0.0336657	0.0750594	0.0695239	0.0607453	0.110905	0.0937644	0.0948355	0.0684733	0.0597407	0.0587674	0.0454905	0.139979	0.0964395	0.0695671	0.0731288	0.0511367	0.0766222	0.0331196	0.0642659	0.0722197	0.08443
BC055324	0.0125598	0.00994012	0.0291512	0.020731	0.0387703	0.0123694	0.0216264	0.012028	0.0108696	0.00953974	0.00968936	0.0115429	0.00357194	0.00315876	0.0101989	0.00549936	0.00904146	0.00550079	0.0101122	0.0142159	0.022789	0.00786861	0.02374	0.00721536	0.0208179	0.034202	0.0211843	0.0118356	0.0175248	0.0108359	0.0223696	0.033559	0.0175829	0.00396389	0.0258817	0	0	0.00310242	0.0204835	0.00341199	0.00721903	0.0122231	0.0230663	0.0160081	0.00501422	0.0221966	0.0279336	0.00854388	0.00475913
Mettl18	0.0220038	0.0113103	0.0240799	0.0363083	0.0521865	0.0208392	0.0183055	0.0161778	0.00867838	0.0499806	0.0310394	0.0134364	0.0180759	0.0429261	0.0348362	0.0119072	0.016313	0.012624	0	0.0472361	0.0135987	0.0241137	0.0187697	0.0110606	0.0377909	0.0248746	0.00711621	0.0402756	0.0173625	0.0547515	0.052734	0.0250916	0.0681651	0.0518856	0.0495667	0.0082757	0.026095	0.00592764	0.0151032	0.0253933	0.0134979	0.032054	0.0299106	0.0182118	0.0447181	0.0313396	0.0573149	0.0233967	0.0224134
Sele	0	0.00257055	0.0204182	0.0136522	0	0	0	0	0	0.00141063	0	0.00215576	0.00714845	0	0	0	0	0.0193123	0	0	0	0.0515657	0.324755	0.105263	0.0515331	0	0.00251755	0.0164258	0	0	0	0	0	0	0	0	0	0	0	0	0	0.00869099	0.00649857	0	0	0	0	0	0
Sell	0	0	0	0	0	0	0	0	0	0	0	0	0	0	0	0	0	0	0	0	0	0	0	0	0	0	0	0	0	0	0	0	0	0	0	0	0	0	0	0	0	0	0	0	0	0	0	0	0
Selp	0	0	0	0	0	0	0	0	0.0022877	0	0	0	0.00318238	0	0	0	0	0	0	0	0	0	0	0.00227773	0	0	0	0	0	0	0	0	0	0	0	0.0027846	0	0	0	0	0	0	0	0.00130676	0	0	0	0	0
Gm16587	0.00224603	0	0	0	0.00366915	0.00227153	0	0	0	0.00328424	0	0	0	0	0	0	0	0	0	0	0	0	0	0	0	0	0	0	0	0	0	0	0	0	0	0	0	0	0	0	0	0.00784002	0.00314624	0	0.00221268	0	0	0	0.000617422
Gm16548	0.00189646	0.00532445	0	0.0102416	0.0125986	0.0114448	0.0334832	0.0285201	0.0411544	0.0380538	0.00135835	0	0	0	0	0.00692271	0	0	0	0	0	0	0	0	0.000796536	0.00338691	0.00198641	0	0	0	0	0.00662449	0	0.00300899	0.0017267	0.00666607	0.0121844	0	0	0.0241908	0.0319473	0.0376395	0.00450572	0.026946	0.0540312	0	0	0	0.00179601
F5	0.0029325	0	0.00543541	0	0	0	0	0	0.00376416	0.00340825	0	0	0	0	0	0	0	0.00386322	0	0	0	0	0	0	0	0	0	0	0	0	0	0	0.0199553	0	0	0	0	0	0	0	0	0.00262663	0.00750075	0.00601621	0	0	0.0098239	0	0
Slc19a2	0.054271	0.013234	0.0337825	0.0935658	0.107983	0.0518583	0.00529028	0.00448066	0.0276347	0.0428462	0.0376202	0.00950262	0.0186792	0.0266612	0.0252205	0.0388945	0.0177352	0.00914826	0.0428299	0.0608076	0.0200502	0.0142765	0.00624148	0.0109191	0.0276793	0.0639163	0.0123549	0.0258975	0.0243538	0.051755	0.0109906	0.0211494	0.0246134	0.055174	0.02655	0.0593879	0.0239552	0.0410939	0.0308073	0.0718765	0.103918	0.0469772	0.0217049	0.0431702	0.0431816	0.0276653	0.0392275	0.0146667	0.0315187
Ccdc181	0.0288652	0.0156049	0.0182128	0.0459192	0.0153058	0.0177579	0.0149092	0.0376881	0.028299	0.00813503	0.0105895	0.00505131	0.0217452	0.0129405	0.0121066	0.0143796	0	0.0143803	0.0183614	0.00520192	0.00782699	0.00576182	0.0115859	0.00626651	0.00659628	0.00499257	0.00838424	0.00456495	0.00264538	0.00807483	0.0256585	0.00692389	0.0523362	0.0105064	0.0202407	0.0165514	0.00863286	0	0	0.0137582	0.0357987	0.0619346	0.0532787	0.0415554	0.011354	0.0348849	0.061659	0.035664	0.0342645
Blzf1	0.168801	0.146019	0.140599	0.0882553	0.172895	0.137771	0.11251	0.0685676	0.0911629	0.110179	0.152437	0.134412	0.150161	0.0893304	0.134971	0.146308	0.130098	0.0889108	0.114378	0.193016	0.153311	0.130611	0.190787	0.104115	0.156851	0.143586	0.122464	0.182765	0.0651576	0.130006	0.140253	0.158323	0.140935	0.17081	0.15366	0.10642	0.115915	0.0816555	0.0791392	0.141922	0.123445	0.154167	0.158188	0.152659	0.125761	0.161456	0.208801	0.161049	0.141052
Nme7	0.178771	0.135695	0.167223	0.149918	0.17113	0.162073	0.113629	0.0939563	0.136865	0.137904	0.161981	0.0938521	0.123378	0.170649	0.147868	0.104941	0.0863503	0.0977914	0.121299	0.182428	0.127426	0.102203	0.139434	0.113043	0.159075	0.1278	0.147722	0.0932249	0.118847	0.11268	0.134267	0.117634	0.245293	0.100448	0.167279	0.140218	0.0686956	0.0926569	0.123327	0.129785	0.169889	0.103001	0.0733988	0.140065	0.108592	0.143008	0.110914	0.109914	0.129441
Atp1b1	0.781974	0.461771	0.575242	0.506617	0.432594	0.325572	0.111028	0.0885476	0.074055	0.038606	0.0204717	0.0334973	0.0628427	0.0174278	0.0034225	0.070115	0.0761908	0.0460646	0.0219577	0.0181586	0.0161233	0.0418554	0.0190765	0.00937403	0.0212023	0.489169	0.383028	0.320803	0.20401	0.103165	0.389431	0.13637	0.117741	0.118206	0.0709469	0.114679	0.0943037	0.0442583	0.0403995	0.0759269	0.700081	0.516262	0.223556	0.0799582	0.0374471	0.0348689	0.0518217	0.0532185	0.122429
Gm32391	0	0	0	0	0	0	0	0	0	0	0	0	0	0	0	0	0	0	0	0	0	0	0	0	0	0	0	0	0	0	0	0	0	0	0	0	0	0	0	0	0	0	0	0	0	0	0	0	0
Gm26685	0	0	0	0	0	0	0	0	0	0	0	0	0	0	0	0	0	0	0	0	0	0	0	0	0	0	0	0	0	0	0	0	0	0	0	0	0	0	0	0	0	0	0	0	0	0	0	0	0
Gm37754	0.00784461	0.00271581	0	0	0	0	0	0	0	0	0.00289138	0	0	0	0	0	0	0	0	0	0	0.00154107	0.00245832	0	0.00272201	0.00564674	0	0	0	0	0	0	0	0	0	0	0	0	0	0	0	0	0	0	0	0	0	0	0
Gm37853	0	0	0	0	0	0	0	0	0	0	0	0	0	0	0	0	0	0	0	0	0	0	0	0	0	0	0	0	0	0	0	0	0	0	0	0	0	0	0	0	0	0	0	0	0	0	0	0	0
Gm37184	0	0	0	0	0	0	0	0	0	0	0	0	0	0	0	0	0	0	0	0	0	0	0	0	0	0	0	0	0	0	0	0	0	0	0	0	0	0	0	0	0	0	0	0	0	0	0	0	0
Gm36945	0	0	0	0	0	0	0	0	0	0	0	0	0	0	0	0	0	0	0	0	0	0	0	0	0	0	0	0	0	0	0	0	0	0	0	0	0	0	0	0	0	0	0	0	0	0	0	0	0.00123422
Dpt	0.120828	0.0228603	0.0453623	0.0901292	0.00859078	0.111191	0.054538	0.0561669	0.014806	0.0229796	0.0215551	0.0519855	0.12998	0.0793693	0.0567371	0.0960339	0.403069	0.198294	0.234214	0.175333	0.0417052	0.0244805	0.0153303	0.0440798	0.0331682	1.09516	1.74836	2.05291	2.17068	0.687376	0.319316	0.441859	0.568186	0.679651	0.385031	0.0862469	0.184386	0.126636	0.172486	0.0939792	0.0025126	0	0.00907112	0	0	0	0.0288974	0.0335596	0.00308684
Gm32569	0	0	0	0	0	0	0	0	0	0	0	0	0	0	0	0	0	0	0	0	0	0	0	0	0	0	0.020198	0	0	0	0	0	0	0	0	0	0	0	0	0	0	0	0	0	0	0	0	0	0.000919643
Xcl1	0	0	0	0	0	0	0	0	0	0	0	0	0	0	0	0	0	0	0	0.00175565	0	0	0	0	0	0	0	0	0	0	0	0	0	0	0	0	0	0	0	0	0	0	0	0	0	0	0	0.00511731	0
1700029M03Rik	0	0	0	0	0	0	0	0	0	0	0	0	0	0	0	0	0	0	0	0	0	0	0	0	0	0	0	0	0	0	0	0	0	0	0	0	0	0	0	0	0	0	0	0	0	0	0	0	0
4930568G15Rik	0	0	0	0	0	0	0	0	0	0	0	0	0	0	0	0	0	0	0	0	0	0	0	0	0	0	0	0	0	0	0	0	0	0	0	0	0	0	0	0	0	0	0	0.00217664	0	0	0	0	0
Tbx19	0	0	0	0	0	0	0	0	0	0	0	0	0	0	0	0	0	0	0	0	0	0	0	0	0	0	0	0	0	0	0	0	0	0	0	0	0	0	0	0	0	0	0	0	0	0	0	0	0
Sft2d2	0.0918966	0.0959416	0.135898	0.127444	0.198677	0.0803741	0.0505657	0.0734581	0.069729	0.0941276	0.036655	0.024214	0.0258342	0.0241598	0.0438671	0.0331154	0.015816	0.0410376	0.0521723	0.0293458	0.012354	0.0149834	0.0172456	0.0570862	0.0377354	0.0684204	0.0628057	0.075891	0.0711375	0.133017	0.0743265	0.0868739	0.117789	0.103827	0.136298	0.0657781	0.0633552	0.0635003	0.0737723	0.104334	0.125126	0.0681986	0.0986937	0.140385	0.122075	0.00744912	0.0383652	0.0859606	0.168254
Tiprl	0.514252	0.520265	0.394469	0.639954	0.668528	0.466553	0.370601	0.283613	0.398722	0.511449	0.467207	0.378377	0.367001	0.520253	0.483283	0.511738	0.442455	0.369807	0.459408	0.527228	0.436424	0.363209	0.416399	0.480502	0.531617	0.527399	0.436862	0.367714	0.593101	0.52475	0.532319	0.482575	0.280401	0.410623	0.655183	0.452691	0.443485	0.359165	0.628903	0.60471	0.470328	0.428151	0.36358	0.438295	0.517484	0.348894	0.26935	0.359059	0.374888
Gpr161	0.0644984	0.0515469	0.0647131	0.0505343	0.0340247	0.0464015	0.0400361	0.0805227	0.0390545	0.054189	0.0493264	0.0433658	0.0942176	0.0173419	0.0397939	0.0637119	0.0490196	0.0569536	0.0436019	0.0334205	0.0543449	0.0308959	0.0270694	0.0539945	0.0548977	0.065158	0.0513366	0.0994113	0.061206	0.0624447	0.0759788	0.0337999	0.0878062	0.0494456	0.0562496	0.0596299	0.0556857	0.0257593	0.0448224	0.0511136	0.0957888	0.0686729	0.0305632	0.0334655	0.0712128	0	0.0161627	0.00775067	0.0020947
Dcaf6	0.252199	0.240733	0.245067	0.131097	0.151647	0.248475	0.192219	0.214285	0.166376	0.167641	0.177908	0.113017	0.218629	0.0974401	0.132513	0.182756	0.138879	0.162727	0.140803	0.108881	0.119988	0.124123	0.120172	0.195539	0.105691	0.176641	0.16088	0.132548	0.180019	0.143574	0.284625	0.148422	0.299263	0.214489	0.166727	0.216018	0.128429	0.187494	0.0902949	0.178312	0.259445	0.246329	0.224342	0.186119	0.137931	0.0721119	0.0902567	0.0865983	0.056034
Mpc2	1.43953	1.30604	1.16227	1.18067	1.61712	1.65549	1.3768	1.47305	1.70242	1.99697	1.35755	1.23037	1.0855	1.26382	1.55636	1.37775	1.16293	1.06871	1.35571	1.5894	1.13347	1.1733	1.15172	1.13784	1.48852	1.54435	1.36433	1.20662	1.73437	1.80441	1.58825	1.51065	1.21715	1.50446	1.90698	1.42474	1.06837	1.18016	1.26693	1.54357	2.15316	1.80519	1.99398	2.65328	2.39157	0.839079	0.646668	0.685673	0.594177
Adcy10	0.00123162	0.008202	0.00496298	0	0	0.0053994	0.00257713	0.00612542	0.00243626	0.00236674	0.00941864	0	0.00571893	0.00435464	0.00125689	0.00352177	0.0043416	0	0.00894246	0	0.01911	0.00860139	0.00210161	0.0167885	0	0.010561	0.00323773	0	0	0	0	0.00841822	0.0191512	0	0	0	0.00947815	0.00952979	0	0	0	0.0115414	0.0132908	0.00376244	0	0	0	0.0044658	0
Gm38325	0	0	0	0	0	0	0	0	0	0	0	0	0	0	0	0	0	0	0	0	0	0	0	0	0	0	0	0	0	0	0	0	0	0	0	0	0	0	0	0	0	0	0	0	0	0	0	0	0
Mpzl1	1.2614	1.1895	0.890026	0.756319	1.13518	0.638232	0.476791	0.474112	0.383771	0.451667	0.850919	0.690874	0.64892	0.677435	0.677077	0.866626	0.617699	0.610927	0.656652	0.632054	1.03713	0.850113	0.886075	0.775132	0.763025	0.914711	0.809465	0.856623	0.726176	0.76757	1.08511	0.966849	0.814971	0.683139	0.795233	0.96324	0.671348	0.733054	0.680084	0.668628	0.686058	0.478682	0.452861	0.365144	0.343769	0.407226	0.302626	0.263129	0.0874586
Rcsd1	0.226155	0.13052	0.167312	0.0847548	0.0795481	0.179771	0.118457	0.179194	0.10952	0.150617	0.490589	0.479886	0.545755	0.493928	0.524253	0.480907	0.343497	0.347839	0.259062	0.296976	0.949863	0.746409	0.944266	0.660438	0.988809	0.197615	0.121266	0.125327	0.177116	0.134128	0.255772	0.323401	0.266641	0.280933	0.164103	0.199881	0.239725	0.28019	0.168429	0.198972	0.191551	0.150794	0.147189	0.113318	0.134338	0.0606357	0.0477771	0.124986	0.015547
Gm37073	0	0	0	0	0	0	0	0	0	0	0	0	0	0	0	0	0	0	0	0	0	0	0	0	0	0	0	0	0	0	0	0	0	0	0	0	0	0	0	0	0	0	0	0	0	0	0	0	0
Creg1	0.467934	0.651331	0.506592	0.665595	0.796205	0.417853	0.393029	0.498908	0.501882	0.591256	0.388056	0.527399	0.405298	0.439312	0.496447	0.399176	0.44561	0.508607	0.847749	0.846499	0.507976	0.531047	0.695898	0.795316	0.756668	0.516461	0.58807	0.532591	0.673548	0.731674	0.375108	0.553037	0.517381	0.58703	0.72097	0.490456	0.502124	0.502055	0.635431	0.645787	0.443066	0.558561	0.489538	0.422168	0.481446	0.31233	0.415354	0.353933	0.527999
Gm36972	0	0	0	0	0	0	0	0	0	0	0	0	0	0	0	0	0	0	0	0	0	0	0	0	0	0	0	0	0	0	0	0	0	0	0	0	0	0	0	0	0	0	0	0	0	0	0	0	0
Cd247	0	0.00412289	0	0.0110081	0	0	0	0	0.00274216	0	0	0	0	0	0	0.00224012	0	0	0.00329617	0.0121632	0	0	0	0	0	0	0.00609272	0.00543237	0.00410549	0.00118576	0	0	0.0108169	0	0.00202791	0	0	0	0	0	0	0	0	0.00659502	0	0	0	0	0.000599754
Gm37469	0	0	0	0.0133711	0	0	0	0	0	0	0.00124986	0	0	0	0	0.00297842	0	0	0	0	0.00317537	0	0	0.00236042	0	0.00279189	0	0	0	0	0	0	0	0	0	0.00228367	0	0	0	0.00352006	0	0	0	0	0	0	0	0	0
Pou2f1	0.272869	0.137943	0.145777	0.345622	0.288666	0.188955	0.175337	0.243119	0.255292	0.266566	0.168083	0.158895	0.186705	0.176757	0.175777	0.191642	0.193406	0.210906	0.245044	0.292698	0.140516	0.149862	0.192212	0.212434	0.258441	0.177909	0.154289	0.210897	0.263504	0.222045	0.283485	0.305787	0.188053	0.369344	0.359974	0.188142	0.210851	0.21551	0.290043	0.239047	0.155213	0.142105	0.163518	0.183611	0.165217	0.267673	0.209489	0.283979	0.188598
Gm26665	0	0	0	0	0	0	0	0	0	0	0	0	0	0	0	0	0	0	0	0	0	0	0	0	0	0	0	0	0	0	0	0	0	0	0	0	0	0	0	0	0	0	0	0	0	0	0	0	0
Gm37923	0	0	0	0	0	0	0	0	0	0	0	0	0	0	0	0	0	0	0	0	0	0	0	0	0	0	0	0	0	0	0	0	0	0	0	0	0	0	0	0	0	0	0	0	0	0	0	0	0
Dusp27	0	0	0	0	0	0	0	0	0	0	0.00242694	0.00144492	0	0	0.00202156	0	0	0	0	0	0	0	0	0.00192728	0	0	0	0	0	0	0	0	0	0	0.000835198	0	0	0	0	0	0	0	0	0	0	0	0	0	0.0010273
Gpa33	0	0	0	0	0.00230502	0	0	0	0	0	0	0	0	0	0	0	0	0	0	0	0	0	0	0	0	0	0	0	0	0	0	0	0	0	0	0	0	0	0	0	0	0	0	0	0	0.00771891	0	0	0
Mael	0	0	0	0	0	0	0	0	0	0	0	0	0	0	0	0	0	0	0	0	0	0	0	0	0	0	0	0	0	0	0	0	0	0	0.00273626	0	0	0	0	0.0206941	0	0	0	0	0	0	0	0	0
Ildr2	0.00719299	0.0121144	0.0480057	0.0418159	0.0786267	0.00797077	0.0038663	0	0.00124592	0	0.00454209	0.00406122	0	0	0.00381843	0.00873373	0	0	0	0.00405441	0	0	0.00141119	0	0.00266733	0.00470959	0.00732536	0.00382686	0	0.00648743	0	0.0188449	0.0265339	0.00762686	0.0520919	0	0	0	0	0	0.0213872	0.010027	0	0.0131888	0	0	0.00614146	0.0107959	0
5330438I03Rik	0	0	0	0	0	0	0	0	0	0	0	0	0	0	0	0	0	0	0	0	0	0	0	0	0	0	0	0	0	0	0	0	0	0	0	0	0	0	0	0	0	0	0	0	0	0	0	0	0
Gm15853	0.00729479	0.00351165	0	0	0.00863528	0.00945665	0.0018063	0	0.00244713	0.00461433	0.00171263	0.00480501	0.00505609	0.0062773	0.00304065	0.0168773	0.0109002	0.00872708	0.00335177	0.00175378	0.00514021	0.00603286	0.0043424	0.0101368	0.0044709	0.0037963	0	0.00319787	0.00870636	0.00643251	0.00396194	0	0.00675004	0.0370405	0.00370127	0.00231825	0.00458852	0	0	0.0116796	0.024721	0.0120724	0.0109264	0.0132032	0.00631967	0.0534118	0.00904313	0.0196811	0.00432698
Tada1	0.176691	0.192242	0.26329	0.208356	0.216158	0.16374	0.153441	0.163387	0.121825	0.187239	0.196195	0.162383	0.265907	0.156221	0.263638	0.210368	0.212927	0.259232	0.120403	0.185037	0.201882	0.224694	0.233463	0.144237	0.236557	0.214027	0.19827	0.254156	0.147833	0.186768	0.210916	0.287484	0.184228	0.132269	0.248417	0.1669	0.18788	0.183046	0.0968321	0.138562	0.173182	0.162196	0.167649	0.175482	0.163664	0.113817	0.203072	0.202951	0.131996
Pogk	0.297732	0.280278	0.279742	0.303217	0.257463	0.207714	0.149713	0.172859	0.145068	0.17161	0.20363	0.188476	0.211165	0.14962	0.147327	0.164193	0.211687	0.115554	0.141404	0.188207	0.211842	0.199646	0.128223	0.138518	0.156664	0.192346	0.17376	0.227265	0.126337	0.189091	0.267909	0.254852	0.327392	0.113601	0.196365	0.27743	0.288518	0.154034	0.212632	0.258873	0.194202	0.239437	0.154297	0.106629	0.130682	0.221651	0.116704	0.206012	0.243744
Gm4846	0	0	0	0	0	0	0	0	0	0	0	0	0	0	0	0	0	0	0	0	0	0	0	0	0	0	0	0	0	0	0	0	0	0	0	0	0	0	0	0	0	0	0	0	0	0	0	0	0
Gm4847	0	0	0	0	0	0	0	0	0	0	0	0	0	0	0	0	0	0	0	0	0	0	0	0	0	0	0	0	0	0	0	0	0	0	0	0	0	0	0	0	0	0	0	0	0	0	0	0	0
Fmo9	0	0	0	0	0	0	0	0	0	0	0	0	0	0	0	0	0	0	0	0	0	0	0	0	0	0	0	0	0	0	0	0	0	0	0	0	0	0	0	0	0	0	0	0	0	0	0	0	0
Gm16701	0	0	0	0	0.00202506	0	0	0	0	0.00119896	0	0	0	0	0	0	0	0	0	0	0	0	0	0	0	0	0	0	0	0	0.0067794	0	0	0	0	0.0040531	0	0	0	0	0	0	0	0	0	0	0	0	0
Gm16701.1	0.00685958	0.00782055	0.0134817	0	0.0131486	0.00640796	0.00893672	0.0022053	0.00200305	0.00685951	0.0136215	0.00363383	0	0	0.00163332	0.00618988	0	0	0	0.00172483	0.00904754	0.00281063	0.014275	0.00608157	0	0.00321575	0.00902483	0	0	0.00553382	0.00448978	0.0173634	0	0.00860046	0.00237189	0.0113897	0	0	0.0147363	0	0.0167311	0	0.00322997	0.0177726	0.00240592	0	0	0.00408695	0.00498909
Fam78b	0.0655779	0.0394477	0.0964425	0.0837511	0.0406648	0.0231402	0.0165611	0.0300835	0.00479241	0.0151974	0.0202449	0.0237433	0.0132779	0.00855786	0.0259854	0.0127943	0.0112339	0.0197886	0	0.0230433	0.00515359	0.0210934	0.0530265	0.0172009	0.0131168	0.0270014	0.079888	0.0399623	0.0222295	0.027412	0	0.0396451	0.0389395	0.042228	0.0290646	0.0157145	0.0199002	0.0258086	0.00556674	0.0184615	0.0164543	0	0.047149	0.0185299	0.00744336	0.032952	0.0481721	0.011957	0.00998894
Uck2	0.0786283	0.100961	0.163516	0.0325612	0.117063	0.0920075	0.157288	0.0637963	0.0456781	0.0843189	0.217323	0.29862	0.297092	0.218621	0.190404	0.128159	0.0994096	0.108899	0.0411668	0.0571195	0.160684	0.238265	0.245553	0.132616	0.149277	0.113978	0.165749	0.0725139	0.0688392	0.0718696	0.0905904	0.106066	0.160713	0.0269702	0.0754432	0.0998619	0.138966	0.0887006	0.119423	0.0945225	0.0529705	0.0616621	0.0723244	0.0215859	0.0507328	0.239068	0.259358	0.244577	0.282235
Gm37982	0	0	0	0	0	0	0	0	0.00274621	0	0	0.00156921	0	0	0	0	0	0	0	0	0	0	0	0	0	0	0	0	0	0	0	0	0	0	0	0	0	0	0	0	0	0	0	0	0	0	0	0	0
Gm2453	0.00141361	0	0	0	0	0	0	0	0	0	0.00171064	0.00154535	0	0.00190701	0	0	0	0.00449156	0.00336789	0	0	0	0	0.0034882	0.00160969	0	0	0	0	0	0	0	0	0	0	0	0	0.00678009	0	0	0	0	0	0	0	0	0	0	0
Tmco1	1.29899	1.19779	0.853719	1.14875	1.40599	1.22633	1.071	1.05338	1.18185	1.33798	1.47817	1.11867	1.20594	1.01888	1.32486	1.3805	1.2089	1.04885	1.07137	1.47525	1.45493	1.08857	1.17548	1.19816	1.41533	1.44246	1.26007	1.25705	1.25752	1.54053	1.55076	1.38621	1.33294	1.39573	1.63675	1.22595	1.22294	0.945559	1.1479	1.27357	1.23642	1.3104	1.03952	1.16026	1.32266	0.91606	1.23856	1.19308	1.30244
Aldh9a1	0.346327	0.316112	0.205549	0.312498	0.400826	0.290993	0.231247	0.211767	0.224733	0.32706	0.355761	0.186091	0.184797	0.22752	0.271416	0.299719	0.253771	0.170856	0.265239	0.21105	0.484288	0.245118	0.269198	0.365769	0.307693	0.275662	0.332563	0.154731	0.220014	0.208012	0.416282	0.340353	0.237843	0.176032	0.25258	0.261841	0.186618	0.169234	0.223281	0.230815	0.290019	0.143294	0.206974	0.232126	0.23357	0.773333	0.452999	0.446671	0.769571
Mgst3	0.147542	0.0573495	0.0715258	0.196504	0.253414	0.280361	0.0931512	0.0875958	0.274738	0.361757	0.170254	0.057049	0.055927	0.137566	0.18059	0.256079	0.0323184	0.0753005	0.254828	0.260492	0.176656	0.0545412	0.0411278	0.124717	0.175493	0.213504	0.0679475	0.0864024	0.233555	0.265503	0.216739	0.106614	0.128378	0.180384	0.227469	0.190335	0.0453775	0.0471037	0.186725	0.190915	0.338444	0.0926175	0.114883	0.303603	0.347152	0.36393	0.176602	0.130101	1.01796
Lrrc52	0	0	0	0	0	0	0	0	0	0	0	0	0	0	0	0	0	0	0	0	0	0	0	0	0	0	0	0	0	0	0	0	0	0	0	0	0	0	0	0	0	0	0	0	0	0	0	0	0
Rxrg	0	0	0	0	0	0	0	0	0.0164615	0.00249961	0.00169677	0	0.004947	0	0	0	0.00570852	0.0096464	0.0166747	0.00541023	0	0.00215578	0	0	0.00377824	0.00754709	0	0	0	0.0138071	0	0	0	0.00957821	0.00651739	0.00193562	0	0	0	0.0021121	0	0	0.00346548	0	0.005599	0	0	0	0
Lmx1a	0	0	0	0	0	0	0	0	0	0	0	0	0	0	0	0	0	0	0	0	0	0	0	0	0	0	0	0	0	0	0	0	0	0	0	0	0	0	0	0	0	0	0	0	0	0	0.00646015	0.0159563	0
Gm20711	0.00124599	0	0	0	0	0	0	0	0	0	0	0	0	0	0	0	0	0	0	0	0	0	0	0	0	0	0	0	0	0	0	0	0	0	0	0	0	0	0	0	0	0	0	0	0	0	0	0	0
Pbx1	5.69657	3.66872	2.68321	5.51088	3.99505	5.96107	3.38388	2.98511	5.00208	4.80525	4.75096	2.08276	1.68466	2.91378	3.05319	4.52189	2.65906	2.26741	4.21517	3.82408	3.20063	1.67356	1.43752	3.07965	2.62738	3.75113	2.08988	1.91337	2.78125	2.71362	5.01047	3.27991	2.67413	4.36378	3.1847	5.67304	2.83854	2.22566	3.45059	3.72307	5.74503	3.43542	2.81283	4.30644	3.9604	6.31213	6.49164	5.81672	5.02075
Gm37839	0	0	0	0	0	0	0	0	0	0	0	0	0	0	0	0	0	0	0	0	0	0	0	0	0	0	0	0	0	0	0	0	0	0	0	0	0	0	0	0	0	0	0	0	0	0	0	0	0
Nuf2	0.00493228	0.00247822	0	0.0129427	0.00707175	0.00239203	0.00950796	0	0	0.00327427	0.00185187	0.00450569	0.00184943	0.00198776	0.00292886	0.00645212	0	0.00986082	0	0	0.0109023	0.00295725	0.00524331	0.001776	0.0203718	0	0.00589852	0.0155321	0.0027424	0.00809283	0	0	0.0505663	0.0055687	0.00845402	0.0104207	0.00603677	0.00315666	0	0.00254776	0.00403964	0.0409953	0	0	0	0.00528011	0.00771234	0	0.00111023
Rgs5	0.010133	0.00368202	0.00773087	0.0460219	0.0112452	0.00464665	0.00450607	0.00348242	0.00196922	0.017023	0.0135907	0.00198005	0.00220055	0	0.00658843	0.0123603	0.00579892	0	0.0133203	0.0147685	0.00232434	0.0163471	0.00744059	0.015346	0.0202736	0	0.00516916	0.0099373	0	0.0826566	0.00488969	0	0	0.00427798	0.0125831	0.00629692	0.00376478	0	0	0.0171104	0.00272466	0	0	0.00114964	0.00367139	0	0.00306905	0	0.000993945
Rgs4	0.00434899	0.0080857	0	0	0	0.024808	0.00292724	0.0165346	0.00820053	0.00226073	0.0032409	0.00490494	0.00473722	0.0154546	0.00544347	0	0	0.0961357	0.0413097	0.0056203	0	0.00553519	0.110548	0.125753	0.0504966	0.00535967	0.00481082	0.0336677	0.00188592	0.00481643	0	0	0	0	0.00356882	0	0	0.00963434	0	0.00954326	0.00952076	0	0.00304414	0.00509172	0	0	0	0.112527	0.000997428
Ccdc190	0	0	0.00808999	0	0	0.00358694	0	0.010078	0.00616584	0.00512467	0	0	0	0.00509009	0	0	0.00536781	0.00448785	0.00934392	0	0	0	0.00446466	0	0.00221093	0.00172669	0	0	0.00498972	0.00662904	0	0	0	0	0	0	0	0	0	0	0.0060424	0	0.0079324	0.00688631	0.00339522	0	0	0	0.000759903
Hsd17b7	0.0719286	0.10757	0.0503057	0.0385298	0.056911	0.172603	0.152572	0.101382	0.0808603	0.107881	0.173964	0.0883744	0.0964683	0.128423	0.0761917	0.159905	0.117206	0.130484	0.165288	0.123119	0.157528	0.0931742	0.138879	0.146043	0.0690859	0.274629	0.112749	0.0998638	0.172672	0.138787	0.0667537	0.0750123	0.0623084	0.0662164	0.0763952	0.169072	0.134153	0.104714	0.101073	0.0891772	0.0827857	0.0936438	0.0649235	0.0538954	0.0738871	0.323927	0.337716	0.780122	0.513563
3110045C21Rik	0.0017619	0	0.00537894	0	0.00693222	0	0.0033139	0	0.00897413	0.0130664	0.0028967	0	0.00304257	0.0111577	0.00428847	0.0110093	0.00219483	0	0.0170997	0.00810882	0.00314424	0.00599643	0.00897289	0.0163518	0.00774897	0	0.00317822	0.00976062	0.00818272	0.0150172	0.0149875	0	0	0.00759111	0.0184445	0.00208089	0	0	0	0.00824542	0	0.0095125	0.00779302	0	0.00326136	0	0	0.0150066	0.0110823
Ddr2	0.734906	0.833921	1.07642	0.968555	0.864735	0.705692	0.846676	0.914915	0.970342	0.982532	0.666761	0.645862	0.921067	0.738902	0.897709	0.8121	0.884334	1.30913	1.17964	1.32959	0.663588	0.547226	0.951504	1.10068	0.93781	0.853969	1.01516	1.46955	1.37182	1.35286	1.0952	1.02958	1.49545	1.70358	1.11381	0.776481	0.893691	0.930803	1.03754	1.2784	0.46187	0.719424	0.587159	0.708208	0.763	0.279859	0.332038	0.412193	0.252652
Uap1	0.23716	0.230793	0.238239	0.191227	0.198698	0.23936	0.159571	0.100247	0.129816	0.187586	0.292611	0.164329	0.18507	0.192686	0.241231	0.227121	0.239085	0.155756	0.35234	0.295173	0.248792	0.235889	0.238706	0.282803	0.234989	0.361551	0.26624	0.16156	0.237474	0.291463	0.235144	0.175008	0.144489	0.20331	0.2116	0.288162	0.190671	0.166386	0.36467	0.260713	0.173803	0.097094	0.113957	0.131801	0.157053	0.220436	0.182534	0.20786	0.243972
Gm37748	0	0	0	0.0114667	0	0.00134107	0	0	0.00300317	0	0	0	0	0.00497711	0.00159504	0	0	0	0.0062725	0.00707787	0	0.00348973	0	0.00379516	0.00140137	0.00208587	0	0	0	0	0	0	0	0.00967159	0	0.0086181	0	0	0	0	0.00254703	0	0	0	0.00495671	0	0	0	0.00108586
Gm37502	0	0	0	0	0	0	0	0	0	0	0	0	0	0	0	0	0	0.00294952	0	0	0	0	0.00278972	0.00155432	0	0.00234239	0.00346232	0	0	0	0	0	0	0	0	0	0	0	0	0	0	0	0	0	0	0	0	0	0.000192452
Uhmk1	0.10207	0.109297	0.109649	0.0927986	0.150042	0.102537	0.0708146	0.0972442	0.0621615	0.113642	0.0937798	0.0855642	0.0638718	0.0441393	0.0627663	0.093399	0.0674398	0.0946068	0.0870779	0.0713758	0.0790481	0.091453	0.080001	0.0938648	0.102424	0.0853328	0.112157	0.0747497	0.0681025	0.119902	0.141957	0.0709578	0.105367	0.150879	0.116688	0.091856	0.106447	0.107948	0.0924481	0.12823	0.0895429	0.0799047	0.0539118	0.0729099	0.0978273	0.0973808	0.0706167	0.166264	0.0967795
4930500M09Rik	0.00183265	0.00293932	0.00464696	0	0	0	0	0	0	0	0	0.00413205	0	0.00257891	0.00151774	0.0033715	0	0	0.0047669	0.00317302	0	0	0	0.00263518	0	0.00267084	0.00512977	0	0.00268255	0.00375732	0	0	0	0	0	0	0.00587551	0	0	0	0	0	0	0	0	0	0	0	0
Sh2d1b2	0	0	0	0	0	0	0	0	0	0	0	0	0	0	0	0	0	0	0	0	0	0	0	0	0	0	0	0	0	0	0	0	0	0	0	0	0	0	0	0	0	0	0	0	0	0	0	0	0
Sh2d1b1	0	0	0	0	0	0	0	0	0	0	0	0	0	0	0	0	0	0	0	0	0	0	0	0	0	0	0	0	0	0	0	0	0	0	0	0	0	0.00552618	0	0	0	0	0	0	0	0	0	0	0
Gm7694	0.0218489	0.0129771	0.012575	0.0205186	0.0212638	0.0243807	0.0124258	0.0205542	0.0450835	0.0321509	0.0143036	0.0107173	0.00324824	0.00843694	0.0141354	0.032683	0.0103563	0.0157702	0.0208738	0.0162373	0.00503416	0.0020081	0	0.0017118	0.00472955	0.0129056	0.00755878	0.0281448	0.0375396	0.050932	0.0225765	0.0048765	0.0180848	0.00639594	0.0165701	0.0148512	0.00283683	0.0278234	0.00977915	0.0278442	0.0206675	0.00629901	0.0210192	0.0529459	0.0525453	0	0.00550896	0.0223389	0.00872265
Nos1ap	0.0743243	0.147215	0.117945	0.103793	0.0886076	0.135561	0.17877	0.175059	0.136778	0.085295	0.0329714	0.0799577	0.0421415	0.044211	0.0499075	0.0636948	0.12275	0.0842438	0.0552703	0.0581094	0.027167	0.0425526	0.0306781	0.0264589	0.0330005	0.122739	0.174031	0.165299	0.19085	0.159411	0.0940158	0.15025	0.225219	0.197053	0.093558	0.0729703	0.164564	0.0944253	0.156363	0.107993	0.0619541	0.236993	0.233386	0.162988	0.0968001	0.0147747	0.0559524	0.123703	0.0371171
Spata46	0	0	0	0	0	0	0.00356986	0	0	0	0	0	0	0	0	0	0	0	0	0	0	0	0	0	0	0	0	0	0	0	0	0	0	0	0	0	0	0.00510025	0	0	0.00387279	0	0	0	0	0	0	0	0
Olfml2b	0.015742	0	0.0185399	0.00420175	0.00534346	0.0443017	0	0.0220241	0.0537371	0.0306564	0.041084	0.0536404	0.105613	0.0899874	0.105721	0.0708861	0.0376799	0.114996	0.0598814	0.116533	0.0357091	0.0314396	0.0981616	0.115182	0.0786627	0.036748	0.0229687	0.0440071	0.0853987	0.0362509	0.0327329	0.0322356	0.0344236	0.0400479	0.0294116	0.0544548	0.013886	0.0193625	0.0457557	0.0407404	0.0245084	0	0.00557289	0.0210666	0.0204438	0.15471	0.15473	0.250379	0.064675
Atf6	0.238773	0.377275	0.292231	0.33544	0.235244	0.277081	0.235008	0.266073	0.299798	0.221125	0.19864	0.241797	0.304455	0.271216	0.182481	0.264636	0.313521	0.319225	0.252734	0.203195	0.205024	0.302131	0.270745	0.349307	0.229248	0.235314	0.352888	0.188082	0.333634	0.163284	0.25636	0.184514	0.175628	0.25515	0.138424	0.243694	0.357509	0.272769	0.254065	0.166441	0.219014	0.208244	0.304931	0.248331	0.177204	0.305389	0.43779	0.408846	0.426042
Dusp12	0.190662	0.195356	0.205443	0.199629	0.241468	0.114184	0.106179	0.0741624	0.118761	0.200984	0.183313	0.193721	0.191319	0.144716	0.251275	0.149622	0.153148	0.165364	0.141906	0.232283	0.167831	0.171903	0.199514	0.169531	0.251283	0.148498	0.188485	0.115889	0.135946	0.164512	0.152488	0.234276	0.0913442	0.196602	0.202043	0.190279	0.13165	0.103747	0.0737523	0.161919	0.143442	0.0993492	0.138758	0.108947	0.161584	0.164698	0.227628	0.137157	0.14359
Gm26620	0.0108276	0.00261221	0	0.00602936	0.00925682	0.0111628	0.0125597	0.00836817	0.0111782	0.0154001	0.0176314	0.0105899	0.0211931	0.00750275	0.0163991	0.00851171	0	0.00970766	0.00462959	0.00628015	0.0250673	0.00650734	0.00862335	0.00486997	0.00614084	0.0146691	0	0.00583738	0.0155654	0.0109571	0	0.0376809	0.0116989	0	0.00467837	0.00968004	0.00463235	0.0224359	0	0.00648424	0.0184889	0.00562041	0.0087184	0.00627466	0	0.0172141	0.00818353	0.00662875	0.00844421
Fcrlb	0	0	0	0	0	0	0	0	0	0	0	0	0	0.00227832	0	0	0	0	0	0	0	0	0	0	0	0	0	0	0	0	0	0	0	0	0	0	0	0	0	0	0	0	0	0	0	0	0	0	0
Fcrla	0	0	0	0	0	0	0	0	0	0	0	0	0	0	0	0	0	0	0	0	0	0	0	0	0	0	0	0	0	0	0	0	0	0	0	0	0	0	0	0	0	0	0	0	0	0	0	0	0
Fcgr2b	0.042719	0.0722493	0.0275004	0.0548075	0.128158	0.0246235	0.0223835	0.0452185	0.178093	0.141102	0.0147246	0	0.00366569	0.0113004	0.0059689	0.00809048	0.020245	0.0240768	0.059365	0.0284937	0.00466606	0.0100026	0.0109122	0.033485	0.0176628	0.0133544	0.0155289	0.0187283	0.0167614	0.0273658	0	0.0263989	0.104177	0.0337244	0.0560688	0.00277009	0.00520361	0	0.060545	0.0121538	0.0568593	0.0414537	0.0466445	0.191292	0.0978364	0	0	0.00663623	0.00101285
Gm38204	0	0	0	0	0	0	0	0	0	0	0	0	0	0	0	0	0	0	0	0	0	0	0	0	0	0	0	0	0	0	0	0	0	0	0	0	0	0	0	0	0	0	0	0	0	0	0	0	0
Gm10522	0	0	0	0	0	0	0	0	0	0	0	0	0	0	0	0	0	0	0	0	0	0	0	0	0	0	0	0	0	0	0	0	0	0	0	0	0	0	0	0	0	0	0	0	0	0	0	0	0
Fcgr4	0	0	0	0	0.00255705	0	0	0	0	0	0	0	0	0	0	0	0	0	0	0	0	0	0	0	0	0	0	0	0.00201727	0	0	0	0	0	0	0	0	0	0	0	0	0	0	0	0	0	0	0	0
Fcgr3	0	0	0	0	0	0	0	0	0.00372391	0.00159593	0	0	0.00351337	0	0.0021461	0	0	0.00227759	0.00356852	0.00662194	0	0	0.00300455	0	0	0.00155238	0	0	0	0.00302155	0	0	0	0	0.00440205	0	0	0.00436949	0.00556674	0	0	0	0	0	0	0	0	0	0
Cfap126	0.0188787	0.0184463	0.0125098	0.0353428	0.016366	0.00874658	0.0135306	0.0124361	0.0162844	0.023684	0.0264091	0.0174355	0.0373216	0.0185006	0.0413157	0.0295602	0.013321	0.0187764	0.0149954	0.024934	0.013162	0.0208359	0.0268268	0.0179438	0.0283365	0.017349	0.0218263	0.0374482	0.0185694	0.019371	0.0227169	0.0202009	0.0084496	0.0213574	0.0220033	0.0193776	0.018332	0.0122058	0.00857581	0.0196168	0.002602	0	0.0180468	0.0133259	0.0180382	0.0334453	0.0114239	0.0407262	0.0409377
Sdhc	0.745414	0.528765	0.514086	0.610262	0.846202	0.781283	0.46034	0.645519	0.719227	0.852634	0.880391	0.588803	0.63561	0.70882	0.749201	0.698968	0.513855	0.460545	0.495468	0.672444	0.892189	0.662512	0.542248	0.708372	0.741871	0.792107	0.620859	0.615997	0.802767	0.815821	0.813743	0.588105	0.469633	0.627099	0.769956	0.704704	0.516369	0.622479	0.46781	0.667456	1.01056	0.781479	0.835965	0.873673	1.02694	1.03581	0.677365	0.73139	0.939035
Mpz	0	0.00235487	0	0	0	0.00291583	0	0	0.00131866	0	0	0	0	0	0	0	0	0	0	0	0	0.0014845	0	0.00293645	0	0	0	0	0	0	0	0	0.0104271	0	0	0	0	0	0	0.00954326	0.00449495	0	0	0	0	0	0	0	0.00204191
[truncated: 29,636 more rows]
[truncated: 55 more columns]
