# Supplementary material for: Distinct waves of ovarian follicles contribute to mouse oocyte production
Source: eLife. 2025 Oct 7;14:RP107352. doi: 10.7554/eLife.107352 (PMC12503487; doi:10.7554/eLife.107352)
Supplement: Source data 5. — Excel file with three sheets:(1) Top250_Initial: top 250 genes (Column G) in initial clusters c0–c30 (Column F). (2) Top250_Granulosa: top 250 genes (Column G) in re-clustered granulosa cell clusters gc0–gc17 (Column F) . (3) Top250_Mesenchymal: top 250 genes (Column G) in re-clustered mesenchymal cell clusters g0–g20 (Column F) . [file elife-107352-data5.xlsx]

## Sheet: Top250_Initial 
Source data 5. Preferentially expressed genes: c0–c30
p_val	avg_log2FC	pct.1	pct.2	p_val_adj	cluster	gene
0	3.98117	1	0.73	0	0	Acta2
0	3.6962	0.996	0.709	0	0	Tagln
0	3.26343	0.981	0.554	0	0	Myh11
0	3.15829	0.996	0.671	0	0	Tpm2
0	3.15258	0.999	0.719	0	0	Myl9
0	3.00858	0.962	0.515	0	0	Actg2
0	2.93724	0.999	0.807	0	0	Mylk
0	2.45704	0.993	0.765	0	0	Csrp1
0	2.39278	0.926	0.51	0	0	Cnn1
0	2.31902	0.965	0.488	0	0	Fbxl22
0	2.26716	0.999	0.951	0	0	Myl6
0	2.15058	0.999	0.932	0	0	Tpm1
0	2.06399	0.942	0.684	0	0	Id2
0	2.04262	0.954	0.459	0	0	Lmod1
0	2.00436	0.955	0.811	0	0	Atf3
0	2.00328	0.995	0.623	0	0	Ogn
0	1.95216	0.935	0.593	0	0	Mfap5
0	1.90964	0.986	0.812	0	0	Serpinf1
0	1.81377	0.978	0.709	0	0	Lpp
0	1.70046	0.897	0.654	0	0	Ckb
0	1.63565	0.869	0.547	0	0	Cxcl14
0	1.63334	0.934	0.539	0	0	Cnn2
0	1.584	0.808	0.505	0	0	Ednrb
0	1.57227	0.947	0.611	0	0	Cavin3
0	1.57183	0.989	0.856	0	0	Flna
0	1.40619	0.989	0.828	0	0	Rarres2
0	1.36601	0.968	0.591	0	0	Sparcl1
0	1.35943	0.923	0.591	0	0	Palld
0	1.34067	0.95	0.709	0	0	Fhl1
0	1.3358	0.997	0.901	0	0	Cald1
0	1.29691	0.812	0.449	0	0	Tnnt2
0	1.26874	0.77	0.412	0	0	Aspn
0	1.25716	0.929	0.635	0	0	Ccdc3
0	1.25295	0.937	0.649	0	0	Selenom
0	1.2334	0.872	0.665	0	0	Nexn
0	1.22269	0.896	0.559	0	0	Itga1
0	1.17242	0.997	0.81	0	0	Tmsb4x
0	1.16567	0.863	0.482	0	0	Cavin2
0	1.09576	0.981	0.923	0	0	Fosb
0	1.0901	0.844	0.487	0	0	Sh3bgr
0	1.08522	0.915	0.653	0	0	Col4a4
0	1.06761	0.945	0.645	0	0	Fstl1
0	1.0522	0.861	0.479	0	0	Ncam1
0	1.04272	0.9	0.786	0	0	Plpp3
0	1.04076	0.819	0.554	0	0	Vldlr
0	1.03384	0.967	0.871	0	0	Lmna
0	1.03131	0.827	0.514	0	0	Pcp4l1
0	1.02925	0.762	0.554	0	0	Hspa1a
0	1.00589	0.977	0.946	0	0	Fos
0	1.00405	0.986	0.847	0	0	Vim
0	0.989128	0.849	0.556	0	0	Cav1
0	0.978271	0.993	0.836	0	0	Lgals1
0	0.97098	0.731	0.419	0	0	Lmcd1
0	0.960534	0.788	0.563	0	0	4930523C07Rik
0	0.95194	0.923	0.774	0	0	Dusp1
0	0.94489	0.807	0.473	0	0	Ppp1r14a
0	0.942136	0.956	0.659	0	0	Igfbp6
0	0.934703	0.962	0.808	0	0	Klf4
0	0.919575	0.995	0.895	0	0	Itih5
0	0.902556	0.968	0.754	0	0	Tuba1a
0	0.900037	0.963	0.664	0	0	Mdk
0	0.893928	0.964	0.886	0	0	Csrp2
0	0.879529	0.861	0.591	0	0	Sorbs1
0	0.876038	0.851	0.657	0	0	Nr4a2
0	0.863764	0.897	0.578	0	0	Smtn
0	0.855915	0.824	0.572	0	0	Arx
0	0.840023	1	0.881	0	0	Sparc
0	0.830109	0.992	0.873	0	0	Cfh
0	0.829396	0.988	0.859	0	0	Apoe
0	0.817085	0.887	0.66	0	0	Fhl2
0	0.811598	0.842	0.565	0	0	Rras
0	0.798603	0.739	0.589	0	0	Myocd
0	0.790545	0.951	0.683	0	0	Ifitm1
0	0.778949	0.964	0.917	0	0	Junb
0	0.776219	0.933	0.735	0	0	Tacc1
0	0.767489	0.806	0.553	0	0	Psd
0	0.75461	0.894	0.61	0	0	Fblim1
0	0.753522	0.893	0.65	0	0	Smoc2
0	0.710046	0.776	0.504	0	0	Aoc3
0	0.709716	0.857	0.648	0	0	Tubb6
0	0.707205	0.984	0.666	0	0	Col1a1
0	0.686081	0.868	0.544	0	0	Mustn1
0	0.663089	0.81	0.626	0	0	Cyp1b1
0	0.647972	0.753	0.502	0	0	1190002N15Rik
0	0.638669	0.788	0.512	0	0	Hhip
0	0.638619	0.792	0.58	0	0	Rbp4
0	0.636851	0.956	0.649	0	0	Mfap4
0	0.636191	0.798	0.527	0	0	Myadm
0	0.635375	0.954	0.614	0	0	Serping1
0	0.629256	0.91	0.754	0	0	Kcnk2
0	0.609866	0.997	0.693	0	0	Col1a2
0	0.578745	0.942	0.619	0	0	Rbp1
0	0.565881	0.748	0.6	0	0	Cryab
0	0.557011	0.813	0.526	0	0	Myl4
0	0.556065	0.815	0.589	0	0	Cxcl12
0	0.55258	0.839	0.643	0	0	Fgl2
0	0.547895	0.957	0.887	0	0	Nupr1
0	0.546091	0.858	0.574	0	0	Fn1
0	0.533358	0.947	0.677	0	0	Gsn
0	0.510392	0.748	0.551	0	0	Ahnak2
0	0.495797	0.96	0.85	0	0	Pmepa1
0	0.480053	0.812	0.631	0	0	Sfrp1
0	0.47625	0.741	0.549	0	0	Serpine1
0	0.451687	0.956	0.695	0	0	Col6a1
0	0.433119	0.838	0.634	0	0	Grb10
0	0.431038	0.71	0.417	0	0	Ntrk3
0	0.391206	0.984	0.745	0	0	Bgn
0	0.370502	0.67	0.384	0	0	Asb2
0	0.350463	0.713	0.418	0	0	Filip1
0	0.329781	0.994	0.729	0	0	Igfbp7
0	0.325268	0.802	0.588	0	0	Col5a2
0	0.313032	0.771	0.52	0	0	Bdnf
0	0.312119	0.793	0.546	0	0	Fbln5
0	0.311426	0.791	0.567	0	0	Glipr2
0	0.305165	0.753	0.484	0	0	Fam71a
0	0.30124	0.926	0.655	0	0	Col6a2
0	0.282773	0.739	0.501	0	0	Vwa1
0	0.27573	0.648	0.335	0	0	Mgll
0	0.273399	0.725	0.429	0	0	Npnt
0	0.269945	0.748	0.559	0	0	Kcnk3
2.9748e-302	0.635615	0.911	0.807	5.94961e-299	0	Col11a1
9.93938e-297	0.678821	0.67	0.502	1.98788e-293	0	Pdlim3
3.5396e-293	0.289485	0.734	0.577	7.0792e-290	0	Ndrg1
4.18089e-293	0.530221	0.732	0.52	8.36178e-290	0	Cd9
1.24346e-291	-0.253738	0.513	0.645	2.48692e-288	0	Folr1
1.78014e-288	0.822455	0.66	0.451	3.56028e-285	0	Carmn
2.85166e-285	0.298128	0.902	0.699	5.70332e-282	0	Igfbp4
7.73872e-280	0.486953	0.667	0.503	1.54774e-276	0	Hspb8
1.30172e-279	0.307544	0.814	0.584	2.60344e-276	0	Nrp2
2.86892e-277	0.30971	0.817	0.599	5.73784e-274	0	Emilin1
1.45345e-276	0.374894	0.823	0.63	2.9069e-273	0	Ank2
3.66084e-263	0.267127	0.628	0.386	7.32167e-260	0	Pdgfrl
2.27836e-260	0.76439	0.735	0.536	4.55672e-257	0	Rasl11a
1.374e-256	0.53862	0.87	0.659	2.748e-253	0	Socs3
2.49359e-246	0.538905	0.92	0.847	4.98718e-243	0	Pim1
2.82805e-244	0.370968	1	0.997	5.65611e-241	0	Malat1
2.38015e-242	0.473965	0.787	0.599	4.76031e-239	0	Rasl11b
3.66407e-238	0.525538	0.892	0.741	7.32813e-235	0	Adamts1
1.90587e-237	0.379339	0.728	0.551	3.81174e-234	0	Nr4a3
1.23392e-227	0.429656	0.723	0.549	2.46783e-224	0	Hist1h2bc
1.95127e-222	0.380282	0.739	0.56	3.90254e-219	0	Clec1a
4.08487e-217	0.320475	0.839	0.723	8.16973e-214	0	Gm12840
4.77514e-215	-0.251706	0.592	0.362	9.55028e-212	0	Cldn5
1.96679e-213	0.436239	0.848	0.779	3.93357e-210	0	Agt
4.04978e-210	0.522496	0.772	0.709	8.09955e-207	0	Foxp2
6.68182e-203	0.321319	0.796	0.679	1.33636e-199	0	Ccdc80
1.55408e-195	0.470243	0.922	0.775	3.10816e-192	0	Gadd45g
4.09922e-193	0.320257	0.749	0.537	8.19844e-190	0	Gpc3
4.07772e-191	0.538137	0.933	0.808	8.15544e-188	0	Klf2
2.78845e-190	0.570411	0.65	0.438	5.5769e-187	0	Gas1
2.09707e-184	0.342405	0.603	0.437	4.19413e-181	0	1500015O10Rik
1.03078e-183	0.412455	0.707	0.552	2.06155e-180	0	Rhoj
5.72495e-182	0.253906	0.688	0.514	1.14499e-178	0	Egr3
1.24831e-179	0.320832	0.762	0.574	2.49662e-176	0	Col6a3
1.87001e-179	1.00469	0.742	0.678	3.74001e-176	0	Hspb1
4.99574e-173	0.252184	0.742	0.628	9.99148e-170	0	Tgm2
3.27125e-172	0.280815	0.694	0.533	6.5425e-169	0	Pde5a
3.88516e-160	0.409581	0.779	0.694	7.77033e-157	0	Gm26532
1.37633e-151	0.345484	0.752	0.651	2.75267e-148	0	Gm17056
6.4195e-147	-0.275437	0.457	0.571	1.2839e-143	0	Kcnk1
9.85469e-147	0.459566	0.582	0.445	1.97094e-143	0	Synpo2
1.15736e-146	0.399174	0.775	0.635	2.31473e-143	0	Zfp36
1.31083e-146	0.334974	0.75	0.615	2.62166e-143	0	Mafb
1.53917e-144	0.323609	0.769	0.642	3.07834e-141	0	Sat1
4.48106e-142	-0.270136	0.282	0.472	8.96212e-139	0	Apold1
6.53333e-142	0.461453	0.642	0.503	1.30667e-138	0	Des
7.68334e-142	0.251896	0.702	0.553	1.53667e-138	0	Zdbf2
5.08591e-135	0.269247	0.743	0.607	1.01718e-131	0	Usp2
5.68824e-135	0.337285	0.675	0.506	1.13765e-131	0	Tcf21
5.89574e-132	0.651982	0.565	0.393	1.17915e-128	0	Id4
1.36752e-130	0.393028	0.669	0.577	2.73503e-127	0	Cdc42ep3
8.06224e-123	-0.26118	0.577	0.635	1.61245e-119	0	Knl1
1.61951e-122	-0.276025	0.357	0.495	3.23902e-119	0	Spin2c
4.74067e-121	0.387082	0.715	0.616	9.48134e-118	0	Hist1h1c
1.59561e-118	-0.303202	0.603	0.628	3.19122e-115	0	Krt18
7.31016e-116	0.597098	0.644	0.575	1.46203e-112	0	Filip1l
9.94403e-116	-0.271182	0.608	0.635	1.98881e-112	0	Cenpm
1.88904e-114	0.451578	0.589	0.44	3.77807e-111	0	Gm26802
3.38954e-112	0.318711	0.725	0.591	6.77908e-109	0	Ier5
7.09514e-104	-0.303585	0.58	0.719	1.41903e-100	0	Serpinb6b
2.34665e-99	-0.261931	0.398	0.531	4.6933e-96	0	Topbp1
3.17197e-97	-0.280748	0.408	0.527	6.34395e-94	0	Plac8
3.4758e-96	-0.250513	0.498	0.568	6.95161e-93	0	Uhrf1
1.24845e-94	-0.29228	0.488	0.594	2.49691e-91	0	Creld2
2.03863e-88	-0.253485	0.295	0.408	4.07726e-85	0	Cdk1
6.48686e-88	0.761245	0.538	0.396	1.29737e-84	0	Myoc
1.04881e-85	-0.255266	0.45	0.566	2.09762e-82	0	Ddx39
1.79487e-85	-0.29946	0.446	0.31	3.58974e-82	0	Ctla2a
1.00999e-84	0.285117	0.935	0.892	2.01997e-81	0	Gadd45b
1.5182e-83	0.364265	0.62	0.53	3.0364e-80	0	Prrx1
1.03625e-75	-0.257822	0.575	0.592	2.0725e-72	0	Slc38a3
1.3064e-75	-0.298804	0.638	0.709	2.6128e-72	0	Cotl1
2.10731e-74	0.630194	0.633	0.562	4.21461e-71	0	Hspa1b
3.5671e-70	-0.266428	0.501	0.609	7.1342e-67	0	Me1
4.15357e-68	0.345902	0.591	0.519	8.30714e-65	0	Pparg
7.19144e-68	-0.273603	0.528	0.61	1.43829e-64	0	Rrm1
6.25309e-66	0.319025	0.508	0.313	1.25062e-62	0	Mcam
6.75542e-66	-0.254717	0.525	0.565	1.35108e-62	0	Gmnn
1.42727e-64	0.266896	0.589	0.479	2.85454e-61	0	Perp
1.1881e-63	-0.25031	0.241	0.338	2.3762e-60	0	Tyrobp
6.15045e-63	0.355878	0.706	0.651	1.23009e-59	0	Thbs4
5.38e-58	-0.269803	0.634	0.52	1.076e-54	0	Tm4sf1
1.30767e-57	0.644552	0.519	0.38	2.61533e-54	0	Syt1
2.8529e-56	-0.280023	0.488	0.553	5.70579e-53	0	Dnajc9
1.13762e-55	-0.259844	0.615	0.642	2.27524e-52	0	Rpa2
1.8251e-55	0.416726	0.577	0.514	3.6502e-52	0	Ramp1
3.77569e-52	-0.272946	0.595	0.601	7.55138e-49	0	Fam81a
4.70471e-50	-0.277786	0.568	0.569	9.40942e-47	0	Mmd2
7.52283e-49	0.34967	0.666	0.648	1.50457e-45	0	Fbxo32
1.26272e-48	-0.264058	0.577	0.567	2.52544e-45	0	Irx3
4.38654e-47	-0.280159	0.596	0.629	8.77308e-44	0	Hmmr
5.32762e-46	-0.303341	0.695	0.743	1.06552e-42	0	Nexmif
7.29149e-44	-0.267716	0.463	0.519	1.4583e-40	0	Tyms
8.71323e-44	0.263423	0.911	0.846	1.74265e-40	0	Dnajb1
1.24713e-40	-0.27641	0.552	0.566	2.49426e-37	0	Ccnb1
1.34976e-39	0.312024	0.73	0.681	2.69953e-36	0	Cyr61
1.36854e-36	-0.256037	0.638	0.672	2.73707e-33	0	Sbno2
1.13602e-33	-0.256346	0.492	0.531	2.27203e-30	0	Pcsk6
5.16006e-32	-0.300632	0.774	0.796	1.03201e-28	0	Igf1
1.936e-30	-0.277001	0.48	0.496	3.87199e-27	0	Shtn1
4.93628e-30	-0.263507	0.703	0.709	9.87256e-27	0	Serpinb1a
6.89492e-30	-0.298122	0.706	0.736	1.37898e-26	0	Pgk1
7.04046e-29	-0.25203	0.617	0.642	1.40809e-25	0	Phgdh
6.86803e-27	-0.289605	0.509	0.551	1.37361e-23	0	Pdgfra
3.57173e-26	-0.262908	0.361	0.44	7.14345e-23	0	Srgn
1.50138e-24	-0.258527	0.937	0.904	3.00275e-21	0	Ldha
2.52955e-21	-0.302498	0.738	0.799	5.05909e-18	0	Aebp1
1.5275e-20	-0.271869	0.861	0.844	3.055e-17	0	Tpi1
2.57565e-20	-0.255788	0.68	0.544	5.15129e-17	0	Colec11
2.75022e-20	-0.254186	0.572	0.572	5.50043e-17	0	Armcx5
1.50597e-19	-0.295631	0.449	0.475	3.01194e-16	0	Ndufa4l2
5.96829e-16	0.252208	0.459	0.253	1.19366e-12	0	Pi15
8.6244e-14	-0.290255	0.604	0.598	1.72488e-10	0	Dnajb14
1.17088e-12	-0.282017	0.643	0.548	2.34177e-09	0	Espn
7.75654e-12	-0.262056	0.656	0.632	1.55131e-08	0	Gata6
2.7479e-11	-0.267728	0.717	0.622	5.49581e-08	0	Serpina3g
1.10883e-10	-0.253133	0.523	0.513	2.21766e-07	0	Emx2
1.31536e-10	-0.283685	0.642	0.608	2.63073e-07	0	Racgap1
1.61327e-10	-0.292742	0.565	0.572	3.22654e-07	0	Nusap1
1.76473e-10	-0.290637	0.528	0.513	3.52946e-07	0	Ptp4a3
1.12969e-08	-0.279676	0.391	0.412	2.25938e-05	0	Esam
1.45835e-08	-0.251845	0.557	0.469	2.91669e-05	0	Mt2
7.90448e-08	-0.303708	0.575	0.532	0.00015809	0	Cited4
1.69129e-07	-0.256981	0.835	0.84	0.000338257	0	Nfkbia
3.14528e-05	-0.286889	0.455	0.451	0.0629056	0	Rasd1
0.000445938	-0.278049	0.644	0.55	0.891875	0	Cdca3
0.000477522	-0.257061	0.61	0.589	0.955043	0	Sorbs2
0.00229546	-0.284695	0.568	0.538	1	0	Prss35
0.00695974	-0.298077	0.587	0.569	1	0	Ramp2
0.00898016	-0.260266	0.705	0.61	1	0	Bpgm
0	1.75446	0.999	0.845	0	1	Grb14
0	1.59349	1	0.957	0	1	Inha
0	1.54783	0.982	0.751	0	1	Tdrd5
0	1.50453	0.996	0.819	0	1	Bex4
0	1.49923	0.989	0.797	0	1	Nr5a2
0	1.46017	0.972	0.773	0	1	Fst
0	1.38807	0.821	0.659	0	1	Nap1l5
0	1.34734	0.998	0.888	0	1	Foxo1
0	1.32933	0.99	0.851	0	1	Cables1
0	1.29871	0.998	0.847	0	1	Ivns1abp
0	1.19014	0.978	0.733	0	1	Ank3
0	1.18878	0.999	0.877	0	1	Gja1
0	1.14021	0.95	0.808	0	1	Apoa4
0	1.12619	0.997	0.856	0	1	Serpine2
0	1.10351	1	0.964	0	1	Akr1cl
0	1.09892	1	0.967	0	1	Ctsl
0	1.04463	0.931	0.69	0	1	Arhgef28
0	1.03873	0.996	0.899	0	1	Cyb5a
0	1.0188	0.897	0.675	0	1	Ddah1
0	1.01657	0.913	0.666	0	1	Prkar2b
0	0.989011	0.919	0.542	0	1	Zfp385b
0	0.961901	0.968	0.879	0	1	Cited2
0	0.959707	0.95	0.75	0	1	Dock4
0	0.952521	0.929	0.719	0	1	Fabp5
0	0.922684	0.971	0.821	0	1	Prss23
0	0.919731	0.922	0.742	0	1	Tex14
0	0.912117	0.95	0.73	0	1	Ephx2
0	0.907488	0.93	0.618	0	1	Hpgd
0	0.905631	0.966	0.828	0	1	Mlf1
0	0.898282	0.897	0.753	0	1	Tes
0	0.874611	0.892	0.739	0	1	Fam46a
0	0.87215	0.909	0.629	0	1	Crim1
0	0.856536	0.99	0.884	0	1	Csrp2
0	0.851184	0.955	0.811	0	1	Derl3
0	0.84312	0.979	0.85	0	1	Ucp2
0	0.835517	0.998	0.898	0	1	Clu
0	0.827384	0.997	0.892	0	1	Map1b
0	0.813649	0.799	0.642	0	1	Cnmd
0	0.811634	0.958	0.786	0	1	Fbln1
0	0.809719	0.961	0.781	0	1	Cndp2
0	0.807857	0.948	0.757	0	1	Arhgap28
0	0.801911	0.797	0.71	0	1	Rasl10a
0	0.773897	0.909	0.76	0	1	Col9a2
0	0.773794	0.887	0.612	0	1	Bmpr1b
0	0.773512	0.926	0.746	0	1	Fam13a
0	0.7553	0.988	0.883	0	1	Rgs2
0	0.755285	0.88	0.659	0	1	Tex15
0	0.743747	0.988	0.843	0	1	Txnl1
0	0.720846	0.906	0.719	0	1	Pik3ip1
0	0.717154	0.874	0.79	0	1	Apoa1
0	0.715876	0.883	0.682	0	1	Ubash3b
0	0.709907	0.998	0.956	0	1	Gapdh
0	0.706998	0.828	0.601	0	1	Mpped2
0	0.706083	0.891	0.7	0	1	Foxp2
0	0.703336	0.787	0.609	0	1	Ctgf
0	0.700854	0.995	0.896	0	1	Chchd10
0	0.699209	0.983	0.914	0	1	Htra1
0	0.695722	0.965	0.785	0	1	Carhsp1
0	0.694916	0.998	0.958	0	1	Sox4
0	0.693846	0.848	0.687	0	1	Cyfip2
0	0.691797	0.847	0.697	0	1	Serpinb6b
0	0.689268	0.86	0.649	0	1	Limch1
0	0.66095	0.778	0.565	0	1	Hsd17b1
0	0.659571	0.738	0.595	0	1	Car14
0	0.641201	0.906	0.71	0	1	Zfp277
0	0.638358	0.997	0.933	0	1	Mif
0	0.635322	0.815	0.596	0	1	Akr1c14
0	0.62681	0.843	0.739	0	1	Ptpre
0	0.626731	0.979	0.849	0	1	Psma2
0	0.616466	0.846	0.655	0	1	Ext1
0	0.603852	0.828	0.654	0	1	Jam2
0	0.593329	0.925	0.765	0	1	Bcat1
0	0.592508	0.887	0.694	0	1	Serpinb1a
0	0.589499	0.878	0.671	0	1	C130074G19Rik
0	0.571302	0.786	0.691	0	1	Tox2
0	0.569701	0.947	0.811	0	1	Txnip
0	0.561929	0.867	0.675	0	1	Evc2
0	0.560367	0.798	0.664	0	1	Vpreb3
0	0.557148	0.945	0.782	0	1	Igf1
0	0.548842	0.941	0.704	0	1	Pik3r1
0	0.526509	0.986	0.889	0	1	Ywhaq
0	0.506685	0.733	0.641	0	1	Mctp1
0	0.499256	0.851	0.6	0	1	Ano4
0	0.49359	0.767	0.669	0	1	Dnajb13
0	0.491802	0.832	0.664	0	1	Rnf19b
0	0.456859	0.776	0.629	0	1	Bmp2
0	0.419017	0.955	0.787	0	1	Soat1
0	0.417897	0.989	0.912	0	1	Serpinb6a
0	0.397492	0.796	0.628	0	1	Mycl
0	0.275118	0.9	0.765	0	1	Mef2c
0	0.262466	0.899	0.756	0	1	Slc18a2
0	-0.322591	0.445	0.646	0	1	Wfdc1
0	-0.333437	0.31	0.647	0	1	Lama4
0	-0.376439	0.329	0.615	0	1	Foxs1
6.78407e-294	0.642355	0.809	0.627	1.35681e-290	1	Mid1ip1
6.29148e-292	0.551515	0.997	0.937	1.2583e-288	1	Hsp90b1
1.48654e-290	0.711909	0.76	0.686	2.97308e-287	1	Slc38a5
1.50873e-290	0.292846	0.948	0.826	3.01745e-287	1	Hjurp
8.47281e-285	0.307613	0.808	0.738	1.69456e-281	1	Arhgdig
5.30704e-284	0.325466	0.749	0.709	1.06141e-280	1	Sel1l3
9.05554e-282	0.343752	0.801	0.656	1.81111e-278	1	Pank1
1.4157e-279	0.521243	0.737	0.638	2.8314e-276	1	Bex1
2.85358e-257	-0.326185	0.278	0.604	5.70716e-254	1	Cbfa2t3
5.48546e-255	0.416259	0.64	0.493	1.09709e-251	1	Adamts5
4.2484e-252	0.26842	0.686	0.63	8.49681e-249	1	Folr1
4.66757e-251	0.393915	0.912	0.815	9.33515e-248	1	Fscn1
7.13187e-244	-0.324234	0.474	0.642	1.42637e-240	1	Serpina3g
1.14217e-237	0.39183	0.845	0.678	2.28434e-234	1	Metrnl
2.17094e-234	0.989136	0.669	0.529	4.34187e-231	1	Hsd3b1
2.48774e-228	-0.257001	0.151	0.511	4.97548e-225	1	Dpt
7.23389e-227	-0.343649	0.349	0.608	1.44678e-223	1	Stox2
2.61133e-221	0.306767	0.683	0.608	5.22267e-218	1	Pla2g1b
7.51066e-221	0.301313	0.82	0.645	1.50213e-217	1	Mex3c
4.44373e-218	0.38699	0.656	0.51	8.88746e-215	1	Net1
1.56826e-217	0.385395	0.933	0.797	3.13652e-214	1	Manf
1.01157e-216	0.45338	0.889	0.809	2.02315e-213	1	Col11a1
3.2801e-214	0.432591	0.701	0.629	6.5602e-211	1	Gramd1b
6.54124e-210	0.292011	0.677	0.559	1.30825e-206	1	Slc25a13
1.19237e-209	-0.33561	0.323	0.605	2.38475e-206	1	Crem
3.49858e-207	0.465126	0.629	0.491	6.99715e-204	1	Slc26a7
1.31373e-206	0.46148	0.933	0.82	2.62745e-203	1	Socs2
3.76255e-198	0.329317	0.88	0.81	7.5251e-195	1	Tnni3
7.04355e-198	0.328299	0.853	0.713	1.40871e-194	1	Eno1
2.17922e-197	0.283321	0.89	0.721	4.35843e-194	1	Pgk1
7.57416e-193	0.400846	0.563	0.463	1.51483e-189	1	1110032F04Rik
9.0275e-189	-0.328834	0.278	0.522	1.8055e-185	1	Thbd
1.14765e-188	0.282713	0.99	0.884	2.29531e-185	1	Hspd1
7.80172e-187	0.267646	0.815	0.698	1.56034e-183	1	Mdfic
2.20831e-186	-0.367425	0.422	0.638	4.41661e-183	1	Bcam
8.84483e-185	1.10936	0.589	0.502	1.76897e-181	1	Inhba
1.62769e-184	-0.266293	0.136	0.4	3.25538e-181	1	Cldn5
2.02946e-182	-0.298893	0.363	0.588	4.05893e-179	1	Nusap1
1.37896e-181	-0.405473	0.433	0.638	2.75792e-178	1	Gm12216
2.24742e-180	0.463962	0.95	0.874	4.49485e-177	1	Klf6
1.13662e-166	-0.38368	0.323	0.549	2.27325e-163	1	Col26a1
1.39971e-166	-0.378335	0.376	0.611	2.79943e-163	1	Cd24a
1.33463e-164	0.345895	0.721	0.588	2.66926e-161	1	Dnajb14
3.06335e-159	-0.31433	0.479	0.619	6.1267e-156	1	Tmem119
7.65307e-152	-0.386864	0.237	0.507	1.53061e-148	1	Pde10a
1.61321e-150	-0.353693	0.358	0.554	3.22642e-147	1	Hic1
1.28298e-147	-0.328833	0.347	0.562	2.56596e-144	1	Pde5a
2.18267e-145	-0.292074	0.262	0.499	4.36534e-142	1	Wnt5a
4.41255e-144	-0.390826	0.461	0.584	8.82511e-141	1	Ntrk2
2.30676e-143	-0.286988	0.403	0.577	4.61352e-140	1	Serpine1
1.31643e-141	-0.285435	0.5	0.635	2.63286e-138	1	Dtx4
3.35782e-135	-0.274194	0.304	0.546	6.71564e-132	1	Egr3
1.73102e-128	-0.325992	0.453	0.596	3.46203e-125	1	Glipr2
9.87967e-126	0.298641	0.803	0.675	1.97593e-122	1	Cyr61
3.05224e-125	-0.346571	0.461	0.631	6.10447e-122	1	Usp2
2.70326e-124	-0.383055	0.315	0.555	5.40651e-121	1	Cd9
3.98048e-121	-0.26434	0.389	0.553	7.96095e-118	1	Bdnf
9.26147e-121	-0.406631	0.349	0.524	1.85229e-117	1	Isg15
5.08151e-120	0.584522	0.53	0.461	1.0163e-116	1	Nppc
9.8643e-115	-0.356148	0.331	0.512	1.97286e-111	1	Iigp1
1.47907e-113	0.311903	0.496	0.399	2.95814e-110	1	Rgs13
7.96626e-113	-0.302915	0.376	0.542	1.59325e-109	1	Tbx2
3.00616e-110	-0.291594	0.409	0.554	6.01231e-107	1	Adcy7
5.02549e-110	-0.377863	0.517	0.606	1.0051e-106	1	Prelp
4.37317e-108	-0.326248	0.454	0.563	8.74635e-105	1	Colec11
2.63563e-106	0.370524	0.475	0.362	5.27126e-103	1	Mro
2.05325e-102	-0.371605	0.491	0.605	4.10649e-99	1	Rbp4
4.26798e-102	-0.311877	0.271	0.24	8.53596e-99	1	Ccl4
7.14055e-102	-0.337678	0.25	0.461	1.42811e-98	1	Enpep
1.34891e-101	-0.332225	0.252	0.485	2.69781e-98	1	Carmn
5.53159e-99	0.364728	0.554	0.499	1.10632e-95	1	Pak3
1.21007e-96	-0.377886	0.325	0.516	2.42014e-93	1	Ier5l
2.89132e-92	-0.280612	0.455	0.64	5.78263e-89	1	Hmmr
3.04342e-91	-0.259805	0.299	0.499	6.08685e-88	1	Cpz
2.19827e-89	-0.379653	0.464	0.583	4.39654e-86	1	Eng
2.81893e-85	-0.250221	0.445	0.611	5.63787e-82	1	Mcm4
1.68804e-80	-0.391737	0.37	0.561	3.37608e-77	1	Bhlhe40
4.91555e-80	-0.387239	0.564	0.704	9.83111e-77	1	Hk2
7.60935e-80	-0.334833	0.467	0.644	1.52187e-76	1	Nfkbiz
5.65739e-79	-0.293454	0.34	0.51	1.13148e-75	1	Sox11
2.16195e-77	-0.381657	0.37	0.52	4.32391e-74	1	Wnt6
5.26555e-76	-0.254697	0.39	0.577	1.05311e-72	1	Hist1h2bc
1.30353e-75	-0.403494	0.356	0.531	2.60706e-72	1	Plac8
1.67195e-73	-0.283347	0.376	0.579	3.34391e-70	1	Egr2
2.21562e-72	-0.376469	0.381	0.521	4.43124e-69	1	Ncam1
6.21691e-71	-0.355015	0.426	0.538	1.24338e-67	1	Ednrb
7.08594e-70	-0.28911	0.36	0.513	1.41719e-66	1	Dnm3os
2.11574e-69	0.261422	0.585	0.591	4.23148e-66	1	Slc38a3
2.77603e-63	-0.274951	0.428	0.576	5.55206e-60	1	Ccnb1
9.31747e-63	-0.330511	0.491	0.576	1.86349e-59	1	Lbh
9.91461e-63	-0.397824	0.254	0.441	1.98292e-59	1	Cyp11a1
1.42898e-62	-0.397052	0.346	0.535	2.85796e-59	1	Hist1h1b
2.17937e-62	0.378005	0.709	0.67	4.35874e-59	1	Fbn2
1.25813e-59	-0.38906	0.355	0.536	2.51625e-56	1	1190002N15Rik
5.34983e-57	-0.304574	0.399	0.528	1.06997e-53	1	Tgfbr2
3.04872e-51	-0.256908	0.509	0.658	6.09744e-48	1	Cwc25
3.55088e-48	-0.387213	0.271	0.467	7.10176e-45	1	Pkdcc
2.42152e-47	-0.392018	0.538	0.65	4.84305e-44	1	Atad2
2.55785e-46	0.252456	0.505	0.482	5.11569e-43	1	Spin2c
2.82384e-46	-0.265604	0.482	0.621	5.64769e-43	1	Racgap1
1.17964e-45	-0.288145	0.542	0.649	2.35928e-42	1	Gjc1
1.71369e-44	-0.25479	0.308	0.464	3.42737e-41	1	Gm26802
3.32452e-41	-0.357862	0.398	0.549	6.64904e-38	1	Smc2
1.40512e-39	-0.282017	0.422	0.58	2.81025e-36	1	Hspa1b
2.00604e-39	-0.37222	0.181	0.342	4.01207e-36	1	Lyz2
3.86267e-38	-0.353558	0.45	0.534	7.72534e-35	1	Pcsk6
8.55303e-38	-0.380429	0.555	0.684	1.71061e-34	1	Pnp
1.28032e-37	-0.358482	0.392	0.506	2.56063e-34	1	Kctd12
1.30765e-36	-0.33663	0.251	0.441	2.61531e-33	1	Gm10600
2.39692e-35	-0.273178	0.549	0.634	4.79383e-32	1	Lox
4.84485e-34	-0.394335	0.665	0.716	9.68971e-31	1	Tmpo
1.78851e-33	-0.394895	0.721	0.731	3.57702e-30	1	Nasp
1.46605e-32	-0.27202	0.377	0.463	2.9321e-29	1	Apold1
4.09307e-32	-0.311801	0.314	0.463	8.18614e-29	1	Lbp
3.05412e-31	-0.286984	0.272	0.45	6.10824e-28	1	Twist1
3.71113e-30	-0.282608	0.867	0.779	7.42227e-27	1	Sdc4
4.41926e-29	-0.288365	0.489	0.601	8.83852e-26	1	Incenp
3.68254e-28	-0.402361	0.426	0.504	7.36507e-25	1	Creb3l1
5.17918e-26	-0.305297	0.487	0.571	1.03584e-22	1	Zdbf2
3.64881e-25	-0.284987	0.514	0.627	7.29762e-22	1	Mcm3
4.66594e-25	-0.367945	0.531	0.592	9.33188e-22	1	Rras
2.09653e-19	0.473103	0.507	0.552	4.19307e-16	1	Inhbb
5.0367e-19	-0.330732	0.602	0.609	1.00734e-15	1	S100a16
1.90916e-18	-0.345565	0.204	0.384	3.81832e-15	1	Bambi
2.05948e-18	-0.315673	0.601	0.649	4.11896e-15	1	Ank2
4.0311e-18	-0.382127	0.521	0.584	8.06219e-15	1	Cav1
6.81316e-18	-0.287887	0.537	0.645	1.36263e-14	1	Id1
7.10296e-18	-0.351664	0.866	0.832	1.42059e-14	1	Dek
1.74898e-17	-0.298561	0.393	0.507	3.49797e-14	1	Cdc20
2.15084e-16	-0.278641	0.313	0.422	4.30167e-13	1	Spon1
2.23964e-16	-0.374194	0.426	0.466	4.47927e-13	1	Ebf1
4.91469e-16	-0.291396	0.417	0.477	9.82939e-13	1	Ndufa4l2
1.11613e-15	-0.363939	0.459	0.497	2.23225e-12	1	Ets1
3.3554e-15	-0.273781	0.606	0.567	6.7108e-12	1	Mustn1
2.44385e-13	-0.253759	0.574	0.616	4.8877e-10	1	Sorbs1
2.8361e-13	-0.314757	0.337	0.46	5.6722e-10	1	Rasd1
9.20668e-13	-0.318626	0.327	0.437	1.84134e-09	1	Emcn
3.68468e-12	-0.360801	0.54	0.568	7.36936e-09	1	Fbln5
2.89487e-11	-0.405277	0.991	0.945	5.78975e-08	1	H2afz
4.94042e-11	-0.288907	0.533	0.538	9.88084e-08	1	Cenpa
7.25855e-11	-0.334642	0.616	0.683	1.45171e-07	1	Gem
7.78192e-11	-0.267372	0.512	0.586	1.55638e-07	1	Filip1l
7.70255e-10	-0.339195	0.361	0.46	1.54051e-06	1	Egfl7
1.11762e-09	-0.381753	0.454	0.509	2.23524e-06	1	Lgals7
1.73076e-09	-0.289222	0.478	0.519	3.46152e-06	1	Pdlim3
1.68128e-08	-0.269673	0.423	0.525	3.36256e-05	1	Vcan
3.37395e-08	-0.299926	0.305	0.323	6.7479e-05	1	Ctla2a
3.30869e-06	-0.336135	0.959	0.898	0.00661738	1	Itih5
4.66407e-06	-0.258117	0.394	0.411	0.00932814	1	Fcer1g
1.2377e-05	-0.277682	0.334	0.426	0.024754	1	Plat
3.76171e-05	-0.255357	0.306	0.407	0.0752342	1	Cdk1
5.40575e-05	-0.311906	0.548	0.594	0.108115	1	Sorbs2
0.000208733	-0.260442	0.176	0.371	0.417467	1	Ifi203
0.000659382	-0.367537	0.499	0.55	1	1	Cxcl2
0.00111022	-0.269486	0.407	0.41	1	1	Esam
0.00767564	-0.313979	0.417	0.446	1	1	Lmcd1
0	2.26852	0.994	0.662	0	2	Kctd14
0	1.90165	0.967	0.561	0	2	AC167229.1
0	1.62188	0.979	0.634	0	2	Itga6
0	1.52929	0.996	0.801	0	2	Amhr2
0	1.5098	0.989	0.804	0	2	Tnni3
0	1.48505	0.967	0.672	0	2	Wnt4
0	1.46477	0.95	0.646	0	2	Cst12
0	1.46289	0.99	0.794	0	2	Gstm2
0	1.43283	0.956	0.64	0	2	Fndc5
0	1.39388	0.998	0.776	0	2	Isyna1
0	1.3836	0.987	0.772	0	2	Sdc4
0	1.34366	0.909	0.68	0	2	Wfdc10
0	1.31734	0.865	0.514	0	2	Cited4
0	1.31544	0.942	0.518	0	2	Col18a1
0	1.30561	0.982	0.81	0	2	Amh
0	1.29522	0.962	0.656	0	2	Tmem184a
0	1.28931	0.998	0.848	0	2	Ldhb
0	1.28607	0.92	0.471	0	2	Fbxo21
0	1.24132	0.986	0.795	0	2	Arhgap29
0	1.1876	0.813	0.407	0	2	Aard
0	1.14436	0.873	0.484	0	2	Wnt6
0	1.12823	0.949	0.597	0	2	Etnk2
0	1.10529	0.939	0.516	0	2	Dpf3
0	1.0982	0.984	0.787	0	2	Soat1
0	1.09747	0.871	0.396	0	2	Gatm
0	1.05206	0.874	0.645	0	2	Rasgef1b
0	1.04308	0.946	0.565	0	2	Adgrg1
0	1.03872	0.974	0.756	0	2	Kazald1
0	1.03462	0.988	0.818	0	2	Socs2
0	1.00781	0.905	0.674	0	2	Rap2b
0	1.0077	0.966	0.721	0	2	Myo10
0	0.991157	0.849	0.457	0	2	Igfbp5
0	0.985981	0.956	0.754	0	2	Slc18a2
0	0.956202	0.998	0.897	0	2	Chchd10
0	0.954906	0.832	0.396	0	2	Gm45889
0	0.949637	0.827	0.5	0	2	Gtf2a1
0	0.942938	0.989	0.738	0	2	Gas6
0	0.936883	0.871	0.535	0	2	Espn
0	0.924881	0.957	0.729	0	2	Myo1b
0	0.91485	0.871	0.516	0	2	Kitl
0	0.906491	0.967	0.705	0	2	Pik3r1
0	0.903193	0.992	0.86	0	2	Ccnd2
0	0.860706	0.81	0.504	0	2	Gldn
0	0.857217	0.983	0.913	0	2	Serpinb6a
0	0.839505	0.833	0.473	0	2	Shtn1
0	0.82531	0.844	0.523	0	2	Defb19
0	0.822736	0.866	0.597	0	2	Pla2g1b
0	0.822558	0.818	0.524	0	2	Mical2
0	0.821064	0.796	0.495	0	2	Emx2
0	0.806497	0.971	0.751	0	2	Scd2
0	0.795439	0.823	0.508	0	2	Pcsk6
0	0.785273	0.728	0.399	0	2	Gm37350
0	0.783611	0.858	0.483	0	2	Cntn4
0	0.731837	0.946	0.738	0	2	Ptges
0	0.73021	0.998	0.899	0	2	Clu
0	0.719175	0.943	0.687	0	2	Wt1
0	0.717744	0.924	0.734	0	2	Myo1e
0	0.703847	0.925	0.614	0	2	Gata6
0	0.688888	0.919	0.658	0	2	Synpo
0	0.676404	0.835	0.575	0	2	Ppfibp2
0	0.665093	0.805	0.427	0	2	Rasd1
0	0.641328	0.998	0.958	0	2	Sox4
0	0.633293	0.792	0.566	0	2	Cbfa2t3
0	0.624302	0.879	0.531	0	2	Tdrp
0	0.608754	0.928	0.657	0	2	Atp1b1
0	0.595609	0.757	0.446	0	2	Mapk13
0	0.591865	0.658	0.346	0	2	E330013P04Rik
0	0.588707	0.988	0.858	0	2	Serpine2
0	0.58554	0.849	0.62	0	2	Mphosph8
0	0.583599	0.856	0.454	0	2	H19
0	0.580266	0.879	0.615	0	2	Krt8
0	0.559547	0.768	0.55	0	2	Adgrf5
0	0.553748	0.78	0.558	0	2	Armcx5
0	0.5462	0.938	0.734	0	2	Ephx2
0	0.536187	0.997	0.893	0	2	Map1b
0	0.532813	0.883	0.643	0	2	Mex3c
0	0.531582	0.812	0.5	0	2	Nrn1
0	0.514549	0.898	0.79	0	2	Apoa1
0	0.460361	0.813	0.552	0	2	Irx3
0	0.448845	0.818	0.57	0	2	Ihh
0	0.424113	0.864	0.543	0	2	Plxna2
0	0.415268	0.87	0.595	0	2	Chp2
0	0.372069	0.744	0.477	0	2	Nipal1
0	0.36515	0.742	0.419	0	2	Susd4
0	0.363932	0.724	0.54	0	2	Krt79
0	0.360033	0.922	0.643	0	2	Meg3
0	0.289709	0.831	0.612	0	2	Krt18
0	0.276563	0.719	0.387	0	2	Sulf1
0	0.252663	0.777	0.526	0	2	Stra6
1.30803e-305	0.60108	0.78	0.499	2.61606e-302	2	Vcan
4.29627e-302	0.392603	0.945	0.803	8.59254e-299	2	Nr5a2
7.27354e-302	0.26274	0.863	0.582	1.45471e-298	2	Msmo1
1.13427e-298	0.320014	0.81	0.618	2.26854e-295	2	Hmga2
5.43526e-297	0.487329	0.88	0.695	1.08705e-293	2	Mdfic
1.89167e-294	0.547182	0.964	0.812	3.78333e-291	2	Maged2
6.83605e-294	0.373444	0.939	0.747	1.36721e-290	2	Fam13a
1.16728e-288	-0.372786	0.216	0.55	2.33456e-285	2	Ednrb
8.86824e-288	0.490182	0.851	0.683	1.77365e-284	2	Gprasp1
2.07996e-286	0.366964	0.888	0.692	4.15993e-283	2	Dusp5
1.28124e-275	-0.327892	0.251	0.521	2.56249e-272	2	Thbd
9.75621e-275	0.471089	0.829	0.692	1.95124e-271	2	Slc40a1
8.27726e-272	0.48538	0.744	0.56	1.65545e-268	2	Dsp
7.33098e-259	-0.300574	0.489	0.634	1.4662e-255	2	Dtx4
2.80229e-251	0.253337	0.724	0.472	5.60459e-248	2	Perp
3.36282e-233	-0.368077	0.2	0.48	6.72565e-230	2	Ebf1
4.09656e-233	0.275436	0.854	0.693	8.19311e-230	2	Cotl1
1.35462e-230	0.292056	0.962	0.853	2.70925e-227	2	Ucp2
2.49345e-229	0.384388	0.801	0.657	4.9869e-226	2	Pank1
1.52907e-226	0.305648	0.839	0.637	3.05814e-223	2	C1galt1
7.25214e-224	0.308411	0.995	0.901	1.45043e-220	2	Cyb5a
8.69838e-221	0.329824	0.941	0.812	1.73968e-217	2	Thbs1
1.68715e-215	0.355053	0.869	0.679	3.3743e-212	2	Metrnl
8.03427e-214	0.311823	0.788	0.539	1.60685e-210	2	Bicd1
1.88269e-212	0.521617	0.775	0.632	3.76537e-209	2	Mycl
3.57818e-211	0.355912	0.69	0.454	7.15636e-208	2	Gsta4
3.7007e-209	0.425898	0.727	0.562	7.40141e-206	2	Mt3
2.58079e-204	-0.29719	0.228	0.498	5.16158e-201	2	Wnt5a
4.03035e-204	0.35735	0.737	0.532	8.0607e-201	2	Slc38a1
3.68971e-200	-0.353627	0.375	0.55	7.37941e-197	2	Hic1
3.29631e-192	-0.262366	0.395	0.55	6.59262e-189	2	Bdnf
3.16624e-190	0.253308	0.808	0.621	6.33247e-187	2	Phlda1
1.29167e-188	-0.379321	0.368	0.558	2.58334e-185	2	Pde5a
3.21998e-185	0.367066	0.642	0.427	6.43996e-182	2	Alcam
7.31676e-182	0.470321	0.6	0.285	1.46335e-178	2	Gm14226
1.68774e-179	-0.371919	0.351	0.508	3.37549e-176	2	Iigp1
3.50699e-169	0.264332	0.869	0.673	7.01399e-166	2	Prkar2b
3.11926e-167	-0.308812	0.369	0.54	6.23853e-164	2	Tbx2
2.26604e-158	0.469674	0.609	0.389	4.53209e-155	2	Gm2044
1.17413e-154	-0.285245	0.308	0.514	2.34826e-151	2	Dnm3os
2.76325e-153	0.344344	0.962	0.875	5.5265e-150	2	Ier3
3.5585e-153	-0.375729	0.336	0.508	7.11699e-150	2	Kctd12
6.78468e-146	0.362668	0.647	0.505	1.35694e-142	2	Cyp2s1
1.01437e-144	-0.323776	0.47	0.561	2.02873e-141	2	Colec11
1.42019e-130	0.346693	0.774	0.671	2.84039e-127	2	Rnf19b
2.53311e-130	-0.395887	0.731	0.533	5.06623e-127	2	Cxcl2
3.05107e-127	-0.315209	0.615	0.608	6.10213e-124	2	Tmem119
4.01807e-127	0.443523	0.568	0.295	8.03614e-124	2	Tmem171
2.62968e-125	-0.362465	0.647	0.627	5.25936e-122	2	Lox
1.01e-124	0.29602	0.889	0.743	2.02e-121	2	2810474O19Rik
1.16474e-123	0.339184	0.753	0.629	2.32949e-120	2	Nnat
3.80962e-123	-0.287369	0.383	0.505	7.61924e-120	2	Sox11
2.86014e-121	-0.381458	0.432	0.539	5.72028e-118	2	Col26a1
1.23588e-120	0.304204	0.678	0.559	2.47176e-117	2	Igfbp2
8.77764e-115	-0.250402	0.52	0.64	1.75553e-111	2	Cenpm
1.37513e-108	-0.332549	0.582	0.586	2.75025e-105	2	Glipr2
1.54941e-108	-0.304678	0.553	0.571	3.09882e-105	2	Mustn1
4.76134e-102	-0.33499	0.54	0.623	9.52268e-99	2	Usp2
1.02192e-101	-0.321239	0.27	0.464	2.04383e-98	2	Gm26802
3.87359e-101	-0.295509	0.554	0.575	7.74719e-98	2	Psd
8.04857e-100	-0.349365	0.528	0.592	1.60971e-96	2	Stox2
2.41735e-97	-0.329809	0.3	0.435	4.8347e-94	2	Gm10600
2.45164e-93	-0.265565	0.567	0.572	4.90328e-90	2	Abi3bp
4.75941e-91	-0.332401	0.514	0.62	9.51882e-88	2	Rasl11b
1.81497e-90	-0.260545	0.195	0.367	3.62993e-87	2	Ifi203
1.75336e-88	-0.375878	0.596	0.644	3.50671e-85	2	Gjc1
1.70278e-86	0.257651	0.645	0.494	3.40556e-83	2	Hsd11b2
2.09058e-82	-0.397995	0.633	0.65	4.18115e-79	2	Fbxo32
2.45263e-82	0.348402	0.522	0.202	4.90527e-79	2	Tmem114
4.56714e-81	-0.373704	0.581	0.701	9.13427e-78	2	Hk2
5.37363e-81	-0.390068	0.445	0.515	1.07473e-77	2	Isg15
9.12254e-81	-0.294389	0.386	0.478	1.82451e-77	2	Ndufa4l2
1.21994e-79	-0.30678	0.404	0.231	2.43989e-76	2	Ccl4
2.14868e-79	-0.258181	0.605	0.365	4.29735e-76	2	Cldn5
7.6574e-75	0.430789	0.642	0.515	1.53148e-71	2	1190002N15Rik
7.66556e-66	0.433611	0.537	0.366	1.53311e-62	2	Gstm6
1.31329e-64	-0.256864	0.468	0.485	2.62659e-61	2	Cpz
2.85167e-63	0.362405	0.524	0.312	5.70335e-60	2	Calb1
2.79907e-62	-0.315922	0.615	0.626	5.59813e-59	2	Spc24
2.913e-62	-0.327125	0.363	0.458	5.826e-59	2	Pkdcc
1.44978e-59	-0.300051	0.288	0.407	2.89955e-56	2	Cdk1
1.94519e-55	-0.312841	0.775	0.57	3.89038e-52	2	Ccnb2
5.57413e-54	-0.260019	0.93	0.857	1.11483e-50	2	Cables1
6.24675e-54	0.256993	0.564	0.453	1.24935e-50	2	Tppp3
1.38879e-53	-0.307522	0.372	0.458	2.77759e-50	2	Lbp
5.57494e-53	-0.2565	0.915	0.827	1.11499e-49	2	Bex4
1.08849e-51	-0.276768	0.494	0.57	2.17698e-48	2	Ccnb1
4.87727e-50	-0.360722	0.509	0.593	9.75453e-47	2	Cenpe
6.03268e-50	-0.283824	0.743	0.5	1.20654e-46	2	Pdlim3
1.33252e-49	-0.291929	0.503	0.533	2.66504e-46	2	1500009L16Rik
2.19168e-49	-0.314953	0.367	0.458	4.38337e-46	2	Egfl7
5.19973e-49	-0.250101	0.255	0.313	1.03995e-45	2	C1qa
5.7635e-47	-0.381565	0.461	0.505	1.1527e-43	2	Ier5l
2.10353e-44	-0.367073	0.668	0.592	4.20706e-41	2	Rbp4
6.16791e-43	-0.305247	0.385	0.463	1.23358e-39	2	Ctsc
1.31347e-40	-0.366397	0.554	0.647	2.62694e-37	2	Hpgd
6.8595e-39	0.332745	0.556	0.516	1.3719e-35	2	Arap2
1.10478e-36	-0.280621	0.75	0.592	2.20955e-33	2	Myocd
1.09177e-34	-0.296898	0.438	0.502	2.18354e-31	2	Cdc20
3.05367e-34	-0.3054	0.601	0.631	6.10735e-31	2	Akr1b8
1.16024e-33	-0.386898	0.644	0.581	2.32047e-30	2	Cdc42ep3
8.59827e-33	-0.320697	0.892	0.835	1.71965e-29	2	Mlf1
1.43308e-32	-0.347741	0.549	0.564	2.86616e-29	2	Hist1h2bc
2.24725e-31	-0.254128	0.939	0.828	4.49451e-28	2	Hjurp
6.32105e-30	-0.251674	0.674	0.584	1.26421e-26	2	Ndrg1
2.44508e-29	-0.284299	0.677	0.557	4.89015e-26	2	Serpine1
2.59811e-29	-0.368031	0.288	0.333	5.19623e-26	2	Lyz2
6.65073e-29	-0.308984	0.85	0.726	1.33015e-25	2	Pik3ip1
7.33072e-27	0.272732	0.555	0.479	1.46614e-23	2	Spin2c
1.1298e-26	-0.330034	0.698	0.617	2.2596e-23	2	Lama4
8.00269e-25	-0.282905	0.802	0.648	1.60054e-21	2	Hoxd9
2.94279e-22	-0.343221	0.563	0.5	5.88559e-19	2	Adamts5
5.85404e-22	-0.368495	0.751	0.706	1.17081e-18	2	Serpinb1a
7.03376e-22	-0.369775	0.651	0.629	1.40675e-18	2	Nfkbiz
7.10383e-22	-0.29651	0.497	0.511	1.42077e-18	2	Ncam1
1.30047e-21	-0.317609	0.427	0.429	2.60094e-18	2	Emcn
2.8411e-21	-0.345547	0.902	0.828	5.6822e-18	2	Prss23
3.94442e-21	-0.384179	0.636	0.575	7.88884e-18	2	Aldh1a1
5.16338e-21	-0.281804	0.569	0.571	1.03268e-17	2	Nusap1
1.17777e-20	-0.372516	0.68	0.566	2.35555e-17	2	Eng
4.43805e-20	-0.325642	0.887	0.742	8.8761e-17	2	Tacc1
1.66705e-19	-0.317129	0.757	0.621	3.33409e-16	2	Serpina3g
8.21188e-19	-0.383071	0.651	0.57	1.64238e-15	2	Ntrk2
7.38704e-18	-0.257286	0.531	0.402	1.47741e-14	2	Fcer1g
3.58844e-17	-0.264846	0.601	0.603	7.17687e-14	2	Rrm1
1.38134e-16	-0.327877	0.423	0.447	2.76268e-13	2	Enpep
5.24801e-16	-0.364188	0.74	0.59	1.0496e-12	2	Prelp
7.11999e-16	-0.253181	0.573	0.615	1.424e-12	2	Akr1c14
8.00048e-15	-0.336138	0.679	0.719	1.6001e-11	2	Rasl10a
6.97759e-14	-0.252523	0.383	0.438	1.39552e-10	2	Tgfb2
7.17077e-14	-0.27192	0.996	0.945	1.43415e-10	2	H2afz
1.28453e-13	-0.375004	0.656	0.53	2.56905e-10	2	Cenpa
2.04363e-13	-0.26379	0.509	0.539	4.08726e-10	2	Cd9
1.21056e-12	-0.283254	0.527	0.427	2.42112e-09	2	Srgn
3.08931e-12	-0.251409	0.701	0.709	6.17862e-09	2	H1fx
4.28479e-12	-0.317438	0.743	0.706	8.56959e-09	2	Serpinb6b
3.69317e-11	-0.304683	0.719	0.572	7.38635e-08	2	4930523C07Rik
4.06656e-11	-0.279815	0.623	0.537	8.13311e-08	2	Adcy7
2.72574e-10	-0.319914	0.586	0.513	5.45148e-07	2	Tgfbr2
3.30548e-10	-0.300786	0.355	0.319	6.61096e-07	2	Ctla2a
9.97191e-09	-0.337663	0.77	0.716	1.99438e-05	2	Nt5dc2
1.48705e-08	-0.279338	0.719	0.62	2.9741e-05	2	Hmmr
2.74989e-08	-0.398495	0.606	0.512	5.49978e-05	2	Plac8
6.73494e-07	-0.290291	0.743	0.599	0.00134699	2	S100a16
7.60882e-07	-0.346713	0.572	0.57	0.00152176	2	Ramp2
1.16531e-06	-0.252926	0.457	0.443	0.00233061	2	Lmcd1
2.43254e-06	-0.347852	0.804	0.82	0.00486508	2	Apoa4
6.77767e-06	-0.337943	0.764	0.642	0.0135553	2	Crim1
1.05778e-05	-0.270294	0.371	0.37	0.0211556	2	Bambi
4.26079e-05	-0.262198	0.532	0.538	0.0852158	2	Smc2
6.29436e-05	-0.256578	0.609	0.554	0.125887	2	Cdca3
9.37025e-05	-0.25568	0.669	0.593	0.187405	2	Fdx1
0.000146673	-0.251008	0.716	0.625	0.293345	2	Knl1
0.000312159	-0.263364	0.784	0.763	0.624318	2	Tes
0.000472956	-0.377894	0.673	0.595	0.945912	2	Slc6a6
0.000782953	-0.369122	0.603	0.537	1	2	Prss35
0.00194536	-0.250314	0.701	0.514	1	2	Aoc3
0.00201231	-0.273183	0.631	0.61	1	2	Racgap1
0.00240132	-0.262802	0.583	0.591	1	2	Sorbs2
0.00399268	-0.281833	0.481	0.433	1	2	Twist1
0.00568378	-0.250714	0.663	0.472	1	2	Dpt
0	2.02701	0.993	0.822	0	3	Prss23
0	1.94647	0.995	0.878	0	3	Cited2
0	1.89325	0.925	0.809	0	3	Gpx3
0	1.76897	1	0.9	0	3	Clu
0	1.66665	1	0.958	0	3	Sox4
0	1.62826	0.986	0.848	0	3	Grb14
0	1.55155	0.947	0.719	0	3	Pik3ip1
0	1.54347	0.965	0.83	0	3	Mlf1
0	1.49769	0.991	0.897	0	3	Chchd10
0	1.4883	0.953	0.78	0	3	Mmp11
0	1.42702	0.994	0.89	0	3	Ywhaq
0	1.23073	0.999	0.96	0	3	Cst3
0	1.11153	1	0.968	0	3	Ctsl
0	1.10197	0.988	0.89	0	3	Foxo1
0	1.09779	0.944	0.707	0	3	Pik3r1
0	1.08875	0.897	0.717	0	3	Fhl1
0	1.08442	0.931	0.767	0	3	Bcat1
0	1.0789	0.851	0.607	0	3	Ctgf
0	1.07343	0.988	0.904	0	3	Cald1
0	1.07133	0.874	0.684	0	3	Uchl1
0	1.05556	0.882	0.635	0	3	Crim1
0	1.03426	0.921	0.758	0	3	Tdrd5
0	1.01659	0.944	0.812	0	3	Thbs1
0	0.923452	0.813	0.632	0	3	Ghr
0	0.875446	0.985	0.85	0	3	Ivns1abp
0	0.87499	0.892	0.724	0	3	Ehd4
0	0.833428	0.91	0.777	0	3	Sdc4
0	0.81882	0.889	0.763	0	3	Col9a2
0	0.807039	0.977	0.823	0	3	Bex4
0	0.784014	0.887	0.756	0	3	Tes
0	0.760522	0.844	0.706	0	3	Foxp2
0	0.754833	0.755	0.633	0	3	Bmp2
0	0.750683	0.839	0.628	0	3	Hpgd
0	0.748898	0.932	0.856	0	3	Cables1
0	0.745191	0.974	0.887	0	3	Csrp2
0	0.743503	0.996	0.848	0	3	Ldhb
0	0.709232	0.761	0.638	0	3	Fgd5
0	0.696561	0.753	0.58	0	3	Sorbs2
0	0.690912	0.867	0.679	0	3	Metrnl
0	0.679829	0.884	0.722	0	3	Acsbg1
0	0.677871	0.917	0.741	0	3	Ank3
0	0.601752	0.987	0.857	0	3	Stmn1
0	0.595904	0.702	0.506	0	3	Prg4
0	0.568078	0.707	0.629	0	3	Gm15866
0	0.546133	0.794	0.622	0	3	Bmpr1b
0	0.544171	0.811	0.684	0	3	Ddah1
0	0.533646	0.851	0.734	0	3	Crip2
0	0.505095	0.806	0.692	0	3	Cyfip2
0	-0.388781	0.274	0.644	0	3	Lama4
1.70846e-298	0.565098	0.905	0.736	3.41692e-295	3	Ephx2
1.6255e-290	1.59172	0.915	0.891	3.251e-287	3	Nupr1
6.40589e-288	0.580544	0.797	0.681	1.28118e-284	3	Gadd45a
7.48463e-288	0.669331	0.933	0.814	1.49693e-284	3	Txnip
4.8679e-286	0.480969	0.653	0.571	9.73581e-283	3	Tubb2b
4.64897e-285	0.477275	0.891	0.764	9.29794e-282	3	Itm2a
9.74432e-280	0.558232	0.815	0.702	1.94886e-276	3	Serpinb1a
4.23629e-274	0.585015	0.669	0.57	8.47257e-271	3	Asb4
5.36621e-273	0.481219	0.865	0.726	1.07324e-269	3	Fabp5
9.91248e-267	0.670894	0.802	0.702	1.9825e-263	3	Serpinb6b
1.94994e-265	-0.323755	0.22	0.577	3.89988e-262	3	Colec11
1.08565e-258	0.489013	0.858	0.819	2.1713e-255	3	Derl3
8.5861e-257	0.567731	0.749	0.604	1.71722e-253	3	Akr1c14
3.70388e-250	0.430092	0.751	0.559	7.40777e-247	3	Zfp385b
7.58622e-247	0.427208	0.803	0.702	1.51724e-243	3	Arhgef28
5.95002e-246	0.35208	0.987	0.88	1.19e-242	3	Gja1
8.04193e-242	0.435348	0.62	0.506	1.60839e-238	3	Ptprz1
3.86654e-239	0.491681	0.847	0.817	7.73309e-236	3	Apoa4
6.50429e-237	0.68861	0.842	0.675	1.30086e-233	3	Cyr61
5.2175e-235	-0.316431	0.356	0.648	1.0435e-231	3	Serpina3g
1.1797e-230	0.616157	0.739	0.679	2.3594e-227	3	Hspb1
6.31834e-228	0.875451	0.78	0.666	1.26367e-224	3	Fbn2
8.06932e-226	-0.395663	0.31	0.606	1.61386e-222	3	Cenpe
1.10244e-223	0.454689	0.834	0.726	2.20488e-220	3	Arrdc3
4.62661e-221	0.373154	0.736	0.711	9.25322e-218	3	Sel1l3
1.02619e-213	0.435955	0.791	0.694	2.05238e-210	3	Slc40a1
1.33783e-211	0.653694	0.682	0.578	2.67565e-208	3	Cdc42ep3
5.75454e-211	0.307356	0.633	0.517	1.15091e-207	3	Pdlim5
1.59851e-208	-0.377157	0.304	0.591	3.19701e-205	3	Eng
1.65965e-205	0.428006	0.64	0.508	3.3193e-202	3	Hsd17b7
5.25294e-202	0.363425	0.987	0.894	1.05059e-198	3	Map1b
1.64525e-201	-0.389201	0.259	0.585	3.2905e-198	3	Nr4a3
3.89601e-200	0.701832	0.696	0.593	7.79202e-197	3	Slc6a6
4.40937e-198	0.385398	0.993	0.934	8.81874e-195	3	Mif
2.62094e-197	-0.404041	0.181	0.54	5.24188e-194	3	Plac8
1.18484e-192	0.662417	0.936	0.876	2.36969e-189	3	Klf6
1.66531e-189	-0.28391	0.359	0.627	3.33062e-186	3	Racgap1
6.56786e-186	0.604542	0.78	0.725	1.31357e-182	3	Tnfrsf12a
9.96371e-184	-0.272388	0.215	0.538	1.99274e-180	3	Tgfbr2
1.10676e-182	0.359099	0.919	0.856	2.21351e-179	3	Ucp2
1.74826e-182	-0.379084	0.34	0.591	3.49653e-179	3	Ntrk2
2.39869e-182	0.25576	0.591	0.549	4.79739e-179	3	Emb
3.23118e-182	-0.344531	0.353	0.61	6.46235e-179	3	Foxs1
4.33204e-180	-0.311749	0.384	0.624	8.66408e-177	3	Tmem119
2.17989e-178	0.526181	0.702	0.641	4.35978e-175	3	Bex1
9.48901e-178	0.636519	0.795	0.784	1.8978e-174	3	Agt
2.6027e-177	-0.282589	0.278	0.588	5.2054e-174	3	Mmd2
6.33379e-177	-0.297653	0.346	0.586	1.26676e-173	3	Nusap1
1.70825e-175	0.398786	0.756	0.664	3.4165e-172	3	Ext1
1.26711e-171	0.315115	0.963	0.847	2.53423e-168	3	Txnl1
1.77386e-171	0.601853	0.782	0.748	3.54772e-168	3	Fam46a
3.9405e-168	0.515526	0.844	0.771	7.881e-165	3	Mef2c
2.48395e-167	0.605121	0.852	0.813	4.9679e-164	3	Tnni3
1.91722e-166	-0.362838	0.374	0.611	3.83444e-163	3	Rbp4
6.52819e-163	-0.276236	0.402	0.641	1.30564e-159	3	Hmmr
3.26592e-156	0.251059	0.949	0.853	6.53185e-153	3	Psma2
3.54057e-156	0.315665	0.93	0.834	7.08115e-153	3	Jpt1
2.50632e-152	-0.33215	0.382	0.634	5.01264e-149	3	Usp2
1.73285e-149	0.318643	0.752	0.633	3.4657e-146	3	Cyp1b1
1.31517e-148	0.256547	0.858	0.715	2.63033e-145	3	Eno1
3.71967e-145	-0.296855	0.476	0.641	7.43934e-142	3	Wfdc1
1.85523e-140	-0.359024	0.272	0.559	3.71045e-137	3	Prss35
1.0449e-139	-0.260277	0.067	0.401	2.08979e-136	3	Cldn5
5.12803e-139	0.339231	0.679	0.547	1.02561e-135	3	Bicd1
3.72522e-137	-0.392865	0.439	0.642	7.45045e-134	3	Akr1b8
2.52655e-135	-0.337088	0.354	0.595	5.0531e-132	3	Cbfa2t3
2.30816e-133	-0.341278	0.294	0.555	4.61631e-130	3	Hic1
2.1838e-132	0.283181	0.81	0.747	4.36761e-129	3	H2-K1
1.29887e-125	-0.268295	0.184	0.475	2.59773e-122	3	Apold1
1.31019e-125	0.445024	0.572	0.497	2.62038e-122	3	Neto2
4.25182e-123	0.292716	0.499	0.469	8.50364e-120	3	Spp1
8.74031e-121	-0.300134	0.265	0.526	1.74806e-117	3	Ncam1
5.34978e-120	-0.25257	0.431	0.638	1.06996e-116	3	Dtx4
1.31378e-118	-0.314759	0.369	0.652	2.62757e-115	3	Gramd1b
1.84401e-115	0.387319	0.89	0.763	3.68801e-112	3	Tuba1a
1.89454e-114	0.313595	0.707	0.642	3.78907e-111	3	Ank2
2.07119e-113	0.526745	0.841	0.813	4.14238e-110	3	Col11a1
1.12824e-112	0.290323	0.721	0.744	2.25648e-109	3	Arhgdig
1.26944e-109	0.329594	0.999	0.965	2.53887e-106	3	Akr1cl
9.49574e-107	-0.331475	0.414	0.62	1.89915e-103	3	Ntng1
5.55371e-106	-0.349382	0.414	0.6	1.11074e-102	3	Stox2
4.33943e-104	-0.275598	0.349	0.579	8.67887e-101	3	Ccnb1
5.56112e-104	0.369699	0.806	0.719	1.11222e-100	3	Ddit4l
6.95296e-101	-0.275818	0.399	0.612	1.39059e-97	3	Mcm4
6.68877e-100	-0.267462	0.416	0.63	1.33775e-96	3	Tmem97
1.17136e-99	0.299147	0.688	0.666	2.34273e-96	3	Jam2
2.02127e-99	-0.290802	0.432	0.638	4.04253e-96	3	Spc24
1.35632e-97	0.264017	0.677	0.658	2.71265e-94	3	Ccdc3
8.60133e-97	0.338985	0.65	0.693	1.72027e-93	3	Edn1
5.14252e-95	-0.251863	0.487	0.64	1.0285e-91	3	Knl1
1.61494e-94	-0.272957	0.245	0.503	3.22988e-91	3	Pde10a
6.21265e-89	-0.284986	0.382	0.553	1.24253e-85	3	Adcy7
1.39079e-88	0.362133	0.498	0.451	2.78159e-85	3	Pdk4
3.74273e-88	-0.316183	0.141	0.445	7.48545e-85	3	Gm10600
3.85228e-88	-0.342263	0.295	0.511	7.70456e-85	3	Iigp1
5.81303e-88	-0.307928	0.362	0.54	1.16261e-84	3	Tbx2
1.74495e-87	-0.399103	0.472	0.688	3.4899e-84	3	Synpo
6.02207e-87	-0.254574	0.278	0.498	1.20441e-83	3	Cpz
2.38092e-84	-0.251572	0.24	0.5	4.76185e-81	3	Dpt
3.12679e-84	-0.345567	0.425	0.624	6.25358e-81	3	Cryab
9.37307e-83	0.558415	0.702	0.703	1.87461e-79	3	Cxcl1
1.44177e-82	-0.370634	0.249	0.477	2.88354e-79	3	Ebf1
7.53707e-82	-0.316596	0.533	0.765	1.50741e-78	3	Ptges
9.37333e-82	0.289594	0.664	0.648	1.87467e-78	3	Fbxo32
3.23813e-76	0.280418	0.575	0.537	6.47626e-73	3	Pcp4l1
5.32793e-76	-0.412491	0.515	0.728	1.06559e-72	3	Igfbp4
1.5938e-74	-0.320355	0.123	0.449	3.1876e-71	3	Emcn
2.57921e-73	0.283734	0.766	0.799	5.15843e-70	3	Apoa1
3.12874e-73	-0.303678	0.318	0.55	6.25748e-70	3	Hells
1.13359e-72	-0.329187	0.348	0.578	2.26718e-69	3	Egr2
2.18346e-72	-0.317403	0.339	0.514	4.36692e-69	3	Thbd
4.8015e-72	-0.383918	0.433	0.615	9.60299e-69	3	Smtn
7.11025e-71	-0.309477	0.26	0.482	1.42205e-67	3	Carmn
1.20812e-70	0.288712	0.612	0.578	2.41625e-67	3	Filip1l
2.33706e-68	-0.327521	0.447	0.642	4.67412e-65	3	Nfkbiz
2.94676e-67	-0.356087	0.468	0.651	5.89351e-64	3	Phgdh
6.59498e-67	-0.286021	0.301	0.522	1.319e-63	3	Wnt6
2.19748e-65	-0.378832	0.38	0.542	4.39496e-62	3	Col26a1
1.70973e-64	0.391934	0.567	0.568	3.41946e-61	3	Fabp3
2.75686e-64	-0.386095	0.36	0.555	5.51372e-61	3	Defb19
1.30169e-62	-0.409328	0.331	0.551	2.60337e-59	3	Prrx1
1.71237e-62	-0.25429	0.422	0.584	3.42474e-59	3	Psd
1.75962e-61	-0.398096	0.406	0.543	3.51925e-58	3	Hhip
2.02772e-61	-0.250828	0.37	0.521	4.05545e-58	3	Mest
4.35908e-61	-0.362648	0.581	0.723	8.71816e-58	3	Fxyd6
7.61227e-61	-0.297718	0.372	0.553	1.52245e-57	3	Mical2
7.80718e-60	-0.267242	0.479	0.43	1.56144e-56	3	Srgn
1.3646e-58	0.286075	0.555	0.578	2.72921e-55	3	Gdpd1
6.09028e-58	-0.347878	0.313	0.511	1.21806e-54	3	Creb3l1
1.18365e-54	-0.376083	0.361	0.52	2.36731e-51	3	Isg15
9.77184e-54	-0.282808	0.209	0.451	1.95437e-50	3	Twist1
1.37998e-52	-0.343741	0.32	0.51	2.75996e-49	3	Prlr
1.49592e-52	-0.305549	0.313	0.51	2.99184e-49	3	Cdc20
6.50957e-49	-0.366106	0.361	0.55	1.30191e-45	3	Cenpa
9.08916e-49	-0.276744	0.34	0.49	1.81783e-45	3	Wnt5a
3.16472e-48	-0.287644	0.482	0.616	6.32945e-45	3	S100a16
1.21109e-46	-0.270171	0.455	0.601	2.42217e-43	3	Mcm5
1.2923e-46	-0.375372	0.495	0.626	2.5846e-43	3	Bpgm
9.89631e-46	-0.329609	0.245	0.458	1.97926e-42	3	Enpep
3.06364e-45	0.408127	0.516	0.503	6.12727e-42	3	Adamts5
4.28707e-45	-0.284099	0.35	0.511	8.57415e-42	3	Dnm3os
9.07903e-45	-0.379753	0.475	0.621	1.81581e-41	3	Actr3b
5.2471e-44	-0.2681	0.261	0.491	1.04942e-40	3	Alas1
7.61339e-44	0.442969	0.803	0.806	1.52268e-40	3	Neat1
9.75673e-43	-0.254685	0.409	0.604	1.95135e-39	3	Scarb1
1.09088e-40	-0.250135	0.075	0.324	2.18176e-37	3	C1qa
2.36233e-40	-0.257927	0.5	0.62	4.72466e-37	3	Chp2
5.63569e-40	-0.343053	0.335	0.508	1.12714e-36	3	Kctd12
4.76238e-37	-0.350302	0.402	0.538	9.52477e-34	3	Ednrb
1.94619e-36	-0.285655	0.33	0.513	3.89239e-33	3	Slc26a7
2.70973e-36	-0.330577	0.416	0.535	5.41945e-33	3	Pcsk6
4.69037e-35	-0.337979	0.262	0.464	9.38073e-32	3	Rasd1
3.1156e-33	-0.38177	0.499	0.622	6.2312e-30	3	Osr2
1.48714e-31	-0.270889	0.261	0.443	2.97428e-28	3	Aard
2.46439e-31	-0.399654	0.398	0.563	4.92878e-28	3	Stc1
4.0131e-31	-0.29841	0.084	0.337	8.0262e-28	3	Ctla2a
2.27325e-30	-0.374671	0.494	0.627	4.5465e-27	3	Mcm3
2.51819e-30	0.297436	0.477	0.486	5.03639e-27	3	Peg10
5.80571e-29	-0.375525	0.987	0.938	1.16114e-25	3	Hsp90b1
9.11822e-28	0.447841	0.624	0.638	1.82364e-24	3	Id1
9.54536e-28	-0.416307	0.546	0.647	1.90907e-24	3	Mid1ip1
1.2251e-26	-0.29852	0.519	0.605	2.4502e-23	3	Prelp
1.23609e-26	-0.340837	0.498	0.612	2.47218e-23	3	Col5a2
3.74183e-26	-0.306398	0.417	0.522	7.48366e-23	3	Pdlim3
1.63315e-25	-0.263062	0.458	0.564	3.26629e-22	3	Cdca3
4.38125e-25	-0.258031	0.495	0.625	8.7625e-22	3	Usp1
5.80358e-25	0.2558	0.491	0.558	1.16072e-21	3	Gpc6
6.75257e-25	-0.287416	0.38	0.505	1.35051e-21	3	Sox11
3.34925e-24	-0.35001	0.521	0.619	6.6985e-21	3	Hmgn2
2.76044e-23	-0.348766	0.469	0.572	5.52088e-20	3	Fbln5
1.0754e-22	-0.314803	0.342	0.514	2.1508e-19	3	Hsd11b2
1.50542e-22	-0.342031	0.387	0.543	3.01083e-19	3	Cks2
3.19453e-21	-0.365027	0.311	0.462	6.38906e-18	3	Egfl7
1.76187e-19	-0.328204	0.51	0.633	3.52373e-16	3	Mafb
2.81978e-18	-0.30544	0.199	0.245	5.63956e-15	3	Ccl4
4.54993e-18	-0.356834	0.508	0.63	9.09987e-15	3	Ugdh
9.61264e-17	-0.372148	0.701	0.732	1.92253e-13	3	Selenoh
2.55699e-16	-0.279435	0.486	0.6	5.11399e-13	3	Incenp
5.44988e-15	-0.354929	0.775	0.766	1.08998e-11	3	Nucks1
1.77284e-14	-0.272221	0.618	0.698	3.54569e-11	3	Hk2
2.34334e-14	-0.319597	0.567	0.681	4.68669e-11	3	Pnp
1.16007e-13	0.254495	0.6	0.724	2.32014e-10	3	Rasl10a
1.3127e-13	-0.355273	0.315	0.461	2.62539e-10	3	Pkdcc
1.36345e-13	-0.304354	0.48	0.59	2.72689e-10	3	Ccnb2
1.98225e-13	-0.342848	0.605	0.675	3.9645e-10	3	Dut
8.14157e-13	0.333679	0.419	0.476	1.62831e-09	3	Angpt2
6.34285e-12	-0.32424	0.864	0.832	1.26857e-08	3	Dek
7.28219e-12	-0.343334	0.418	0.529	1.45644e-08	3	1190002N15Rik
1.07505e-11	-0.305428	0.336	0.46	2.1501e-08	3	Lbp
5.54824e-11	-0.283837	0.476	0.581	1.10965e-07	3	Clec1a
3.94869e-10	-0.287299	0.372	0.494	7.89737e-07	3	Plk2
8.26025e-09	-0.350063	0.553	0.643	1.65205e-05	3	Nnat
1.96662e-08	-0.36791	0.245	0.336	3.93323e-05	3	Lyz2
4.45395e-08	-0.300086	0.431	0.545	8.90789e-05	3	Smc2
2.72881e-07	-0.284555	0.688	0.722	0.000545763	3	Nt5dc2
7.43119e-07	0.264866	0.391	0.454	0.00148624	3	Crabp2
1.36143e-05	-0.263117	0.292	0.418	0.0272285	3	Fcer1g
3.54985e-05	-0.312343	0.57	0.636	0.0709969	3	Lmnb1
0.000695799	-0.404387	0.95	0.9	1	3	Itih5
0.00267396	-0.287304	0.392	0.478	1	3	Ndufa4l2
0.00308607	-0.268916	0.549	0.601	1	3	Dnajb14
0	2.28983	0.989	0.667	0	4	Dcn
0	1.98519	0.985	0.654	0	4	Mfap4
0	1.88401	0.952	0.586	0	4	Lum
0	1.70403	0.999	0.875	0	4	Cfh
0	1.66241	0.993	0.832	0	4	Mgp
0	1.52743	0.859	0.62	0	4	Cebpd
0	1.46117	0.865	0.591	0	4	Cxcl12
0	1.4603	0.997	0.897	0	4	Itih5
0	1.45739	0.824	0.557	0	4	Cxcl14
0	1.44942	0.993	0.862	0	4	Apoe
0	1.40096	0.948	0.588	0	4	Htra3
0	1.36757	0.98	0.738	0	4	Cygb
0	1.31077	0.945	0.704	0	4	Bicc1
0	1.2956	1	0.735	0	4	Igfbp7
0	1.29015	0.897	0.662	0	4	Socs3
0	1.24223	0.891	0.661	0	4	Icam1
0	1.23868	0.956	0.853	0	4	Pmepa1
0	1.22801	0.99	0.75	0	4	Bgn
0	1.19667	0.967	0.948	0	4	Fos
0	1.16075	0.868	0.646	0	4	Fgl2
0	1.15577	0.948	0.622	0	4	Serping1
0	1.15179	0.967	0.742	0	4	Mmp2
0	1.12715	0.926	0.685	0	4	Gsn
0	1.10174	0.954	0.634	0	4	Ogn
0	1.09892	0.817	0.54	0	4	Matn2
0	1.09487	0.952	0.834	0	4	Rarres2
0	1.08464	0.979	0.805	0	4	Ifitm3
0	1.04825	0.954	0.689	0	4	Ifitm1
0	0.984275	0.749	0.505	0	4	Tcf21
0	0.972105	0.833	0.649	0	4	Nrp1
0	0.953139	0.941	0.626	0	4	Rbp1
0	0.907186	0.969	0.7	0	4	Col6a1
0	0.880777	0.784	0.581	0	4	Arx
0	0.845838	0.979	0.704	0	4	Col3a1
0	0.837047	0.925	0.654	0	4	Nid1
0	0.82822	0.884	0.779	0	4	Agt
0	0.826947	0.871	0.58	0	4	Fn1
0	0.821375	0.824	0.53	0	4	Nrxn1
0	0.819408	0.955	0.666	0	4	Igfbp6
0	0.815158	0.898	0.759	0	4	Kcnk2
0	0.808133	0.918	0.759	0	4	Selenop
0	0.805717	0.912	0.722	0	4	Eva1b
0	0.796227	0.921	0.673	0	4	Mdk
0	0.791677	0.769	0.534	0	4	Pdgfra
0	0.789651	0.855	0.608	0	4	Gm12216
0	0.733109	0.983	0.673	0	4	Col1a1
0	0.725777	0.847	0.678	0	4	Adamts4
0	0.691707	0.871	0.605	0	4	Sparcl1
0	0.690113	0.926	0.661	0	4	Col6a2
0	0.667076	0.876	0.579	0	4	Lama2
0	0.666242	0.977	0.85	0	4	Vim
0	0.63573	0.787	0.598	0	4	Tmem119
0	0.613888	0.993	0.7	0	4	Col1a2
0	0.60933	0.769	0.551	0	4	Serpine1
0	0.542313	0.835	0.62	0	4	Fblim1
0	0.526478	0.998	0.884	0	4	Sparc
0	0.502666	0.804	0.539	0	4	Colec11
0	0.434224	0.812	0.514	0	4	Col26a1
0	0.399796	0.759	0.444	0	4	Ebf1
0	0.38192	0.854	0.642	0	4	Col15a1
0	0.354091	0.787	0.62	0	4	Serpina3g
0	0.326758	0.959	0.77	0	4	Col4a1
0	0.2998	0.749	0.525	0	4	D630033O11Rik
6.11767e-296	0.271936	0.791	0.615	1.22353e-292	4	Dtx4
1.02279e-282	0.671214	0.682	0.437	2.04558e-279	4	Gm26802
1.06968e-282	0.530644	0.827	0.603	2.13935e-279	4	Emilin1
6.3119e-282	1.08277	0.948	0.919	1.26238e-278	4	Junb
1.1903e-280	0.533786	0.888	0.655	2.38059e-277	4	Fstl1
5.48518e-269	0.91045	0.798	0.615	1.09704e-265	4	Mafb
5.07135e-264	0.541847	0.7	0.51	1.01427e-260	4	Abca8a
1.6348e-260	0.636096	0.785	0.577	3.2696e-257	4	Col6a3
7.39801e-259	1.15747	0.946	0.813	1.4796e-255	4	Klf4
1.60604e-244	0.630947	0.745	0.596	3.21207e-241	4	Pdgfrb
1.24107e-238	0.561016	0.882	0.705	2.48213e-235	4	Igfbp4
1.55668e-234	0.497683	0.857	0.704	3.11336e-231	4	Slc9a3r2
2.6256e-233	0.318123	0.913	0.765	5.2512e-230	4	Col4a2
2.26587e-229	0.947643	0.961	0.925	4.53175e-226	4	Fosb
1.23124e-226	0.386601	0.766	0.583	2.46248e-223	4	Foxs1
1.73913e-226	0.587859	0.83	0.66	3.47825e-223	4	Smoc2
8.77783e-224	0.498987	0.77	0.611	1.75557e-220	4	Mfap5
1.5875e-220	0.988466	0.898	0.779	3.175e-217	4	Dusp1
2.53935e-213	-0.311391	0.474	0.636	5.07871e-210	4	Krt18
5.55966e-213	0.394781	0.813	0.648	1.11193e-209	4	Hoxd9
6.78689e-210	-0.308077	0.047	0.254	1.35738e-206	4	Ccl4
8.10371e-209	0.421573	0.764	0.59	1.62074e-205	4	Loxl1
2.00669e-208	0.475714	0.799	0.591	4.01338e-205	4	Nrp2
1.09303e-206	0.270658	0.799	0.632	2.18606e-203	4	Pltp
3.73258e-205	0.264205	0.828	0.605	7.46516e-202	4	Bpgm
3.44853e-204	0.461921	0.769	0.54	6.89706e-201	4	Gpc3
3.51005e-195	0.508571	0.858	0.718	7.02009e-192	4	Fbn1
1.11333e-193	0.556365	0.672	0.427	2.22665e-190	4	Cd34
9.23869e-193	0.459891	0.753	0.541	1.84774e-189	4	Col5a1
1.41855e-192	-0.252964	0.374	0.575	2.8371e-189	4	Dbf4
2.17679e-190	0.40076	0.7	0.484	4.35358e-187	4	Kctd12
8.32942e-190	0.576849	0.715	0.5	1.66588e-186	4	Cavin2
5.01088e-185	-0.263971	0.432	0.624	1.00218e-181	4	Chp2
2.25771e-182	0.574028	0.802	0.65	4.51543e-179	4	AU020206
3.11063e-181	-0.251382	0.428	0.594	6.22125e-178	4	Dnph1
1.72656e-176	-0.274532	0.309	0.543	3.45312e-173	4	Fdps
1.47255e-169	0.283646	0.987	0.904	2.94509e-166	4	Cald1
1.95088e-166	0.586906	0.753	0.612	3.90176e-163	4	Cxcl10
2.53054e-166	0.415323	0.692	0.486	5.06109e-163	4	Creb3l1
6.53614e-164	0.480744	0.876	0.743	1.30723e-160	4	Tacc1
9.86094e-163	0.576296	0.712	0.527	1.97219e-159	4	Olfml3
7.30558e-155	0.507583	0.7	0.525	1.46112e-151	4	Lrrc17
1.4825e-152	0.501491	0.762	0.613	2.965e-149	4	Peg3
3.355e-151	-0.303815	0.409	0.571	6.71001e-148	4	Kcnk1
1.57231e-148	-0.296558	0.468	0.599	3.14462e-145	4	Ppfibp2
4.6236e-147	0.396058	0.999	0.997	9.2472e-144	4	Malat1
7.4081e-146	0.609883	0.755	0.639	1.48162e-142	4	Sfrp1
3.31078e-143	0.477817	0.735	0.61	6.62157e-140	4	Palld
5.1082e-143	0.564532	0.722	0.574	1.02164e-139	4	Tmem100
3.12615e-142	0.656366	0.721	0.608	6.25229e-139	4	Osr2
3.13573e-142	0.40731	0.884	0.764	6.27146e-139	4	Tuba1a
1.37884e-139	-0.269106	0.508	0.641	2.75769e-136	4	Cenpm
5.00389e-139	-0.283137	0.486	0.607	1.00078e-135	4	Fam81a
2.13168e-138	0.59122	0.674	0.539	4.26336e-135	4	Lhfp
3.98678e-136	0.584764	0.664	0.57	7.97356e-133	4	Ntrk2
2.08823e-134	0.261245	0.633	0.474	4.17646e-131	4	Dpt
3.22681e-134	0.276595	0.731	0.591	6.45362e-131	4	Prelp
1.574e-133	-0.279542	0.209	0.423	3.14799e-130	4	Esam
1.91946e-133	0.416242	0.678	0.528	3.83891e-130	4	Prrx1
9.36693e-133	0.457961	0.887	0.789	1.87339e-129	4	Plpp3
1.63638e-132	-0.295175	0.463	0.6	3.27275e-129	4	Mcm5
3.96764e-129	0.339022	0.79	0.665	7.93529e-126	4	Selenom
1.84291e-126	0.426502	0.731	0.597	3.68581e-123	4	Col5a2
7.60436e-124	0.266248	0.785	0.629	1.52087e-120	4	Cavin3
2.40331e-122	-0.309535	0.363	0.524	4.80663e-119	4	Emx2
2.81915e-122	0.424608	0.792	0.667	5.63829e-119	4	Col4a4
3.15465e-121	0.411328	0.827	0.685	6.30929e-118	4	Hk2
6.30056e-116	0.496782	0.864	0.73	1.26011e-112	4	Irf1
7.92836e-115	0.490812	0.747	0.553	1.58567e-111	4	Egr2
2.51937e-113	0.343395	0.708	0.581	5.03873e-110	4	Stox2
1.47194e-112	-0.257483	0.389	0.538	2.94388e-109	4	Ednrb
3.42964e-112	0.431506	0.634	0.493	6.85927e-109	4	Dnm3os
1.04391e-111	0.401442	0.835	0.797	2.08781e-108	4	2024-09-11
8.73244e-110	0.414837	0.773	0.683	1.74649e-106	4	Ccdc80
3.04303e-109	0.416911	0.693	0.572	6.08606e-106	4	Loxl2
4.09355e-108	0.540569	0.668	0.528	8.1871e-105	4	Cdh11
1.18697e-106	0.448052	0.76	0.673	2.37395e-103	4	Fhl2
5.44292e-105	-0.272357	0.665	0.488	1.08858e-101	4	Lmod1
5.62656e-103	0.377399	0.586	0.379	1.12531e-99	4	Dpep1
3.15427e-102	0.424323	0.664	0.551	6.30854e-99	4	Srpx2
2.63881e-100	0.492522	0.674	0.558	5.27763e-97	4	Rhoj
4.70367e-100	0.363439	0.578	0.408	9.40734e-97	4	Tnfsf9
6.35197e-100	-0.258547	0.442	0.594	1.27039e-96	4	Creld2
1.22232e-99	-0.271997	0.526	0.742	2.44464e-96	4	Sh3bgrl3
6.40522e-99	0.688071	0.918	0.812	1.28104e-95	4	Klf2
5.40104e-98	0.489108	0.646	0.487	1.08021e-94	4	Gucy1a1
1.56288e-97	-0.250525	0.475	0.65	3.12577e-94	4	Phgdh
1.63486e-97	0.326193	0.78	0.612	3.26972e-94	4	Ugdh
5.65965e-96	0.364344	0.597	0.406	1.13193e-92	4	Gucy1b1
5.78234e-95	0.480822	0.718	0.655	1.15647e-91	4	Slc29a1
3.13365e-91	0.724815	0.934	0.893	6.2673e-88	4	Gadd45b
3.17025e-91	0.477057	0.591	0.419	6.34049e-88	4	Emcn
8.1349e-90	0.606523	0.667	0.608	1.62698e-86	4	Actr3b
2.41856e-89	0.304912	0.66	0.544	4.83711e-86	4	Sox9
1.387e-87	-0.277712	0.467	0.57	2.774e-84	4	Plxna2
5.44212e-86	1.23779	0.667	0.565	1.08842e-82	4	Hspa1a
9.82219e-86	0.63894	0.776	0.721	1.96444e-82	4	Ddit4l
5.32269e-83	0.304855	0.642	0.502	1.06454e-79	4	Isg15
3.22386e-80	-0.26748	0.448	0.596	6.44772e-77	4	Epas1
3.60181e-79	0.836253	0.76	0.731	7.20361e-76	4	Gm12840
5.64423e-79	0.465882	0.618	0.511	1.12885e-75	4	Plac8
1.74025e-76	0.347501	0.646	0.532	3.48049e-73	4	Hic1
6.82878e-75	0.394939	0.867	0.794	1.36576e-71	4	Fbln1
1.71645e-74	0.677211	0.542	0.397	3.43289e-71	4	Lrat
7.68568e-73	-0.279966	0.385	0.525	1.53714e-69	4	Vcan
1.80601e-72	0.62892	0.691	0.644	3.61201e-69	4	Zfp36
3.51142e-72	-0.267704	0.509	0.609	7.02284e-69	4	Rrm1
3.54737e-71	0.2731	0.663	0.537	7.09475e-68	4	Gbp7
1.39506e-67	0.44953	0.655	0.586	2.79013e-64	4	Ifi27l2a
6.69843e-67	0.540502	0.634	0.477	1.33969e-63	4	Plk2
6.71933e-66	-0.296443	0.42	0.564	1.34387e-62	4	Bicd1
3.15375e-63	0.625295	0.795	0.75	6.30749e-60	4	Adamts1
3.85858e-63	-0.259377	0.478	0.578	7.71715e-60	4	Armcx5
6.66232e-63	0.396233	0.622	0.569	1.33246e-59	4	Abi3bp
3.353e-62	-0.257317	0.442	0.521	6.706e-59	4	Sh3bgr
4.33911e-62	-0.310471	0.595	0.681	8.67823e-59	4	Fdxr
1.74273e-58	0.279766	0.633	0.511	3.48546e-55	4	Abca1
4.02044e-55	-0.275174	0.519	0.568	8.04089e-52	4	Ccnb1
2.15587e-53	0.401453	0.517	0.335	4.31174e-50	4	Dio3
2.73015e-50	-0.304222	0.487	0.643	5.46029e-47	4	Mphosph8
4.69086e-49	0.399923	0.639	0.61	9.38173e-46	4	Cryab
2.95765e-48	0.969741	0.874	0.882	5.9153e-45	4	Mt1
1.47423e-46	0.453584	0.584	0.497	2.94846e-43	4	Ier5l
4.7233e-46	-0.304862	0.66	0.7	9.44659e-43	4	Lpl
2.27766e-44	-0.262868	0.686	0.727	4.55531e-41	4	Zfp277
3.19282e-44	0.347424	0.533	0.365	6.38564e-41	4	Nrk
4.32968e-43	0.343541	0.656	0.546	8.65936e-40	4	Rasl11a
7.88004e-42	0.490796	0.669	0.598	1.57601e-38	4	Ier5
1.66345e-40	-0.296634	0.646	0.67	3.32691e-37	4	Sbno2
8.22072e-40	0.308238	0.772	0.668	1.64414e-36	4	Pnp
1.00282e-39	0.263576	0.561	0.418	2.00564e-36	4	Gm10600
1.48146e-39	-0.268349	0.413	0.5	2.96292e-36	4	Shtn1
8.60682e-38	0.380651	0.56	0.498	1.72136e-34	4	Ms4a4d
3.98926e-37	0.273362	0.589	0.513	7.97853e-34	4	Tgfbr2
1.2875e-36	-0.294623	0.63	0.639	2.575e-33	4	Tuba1c
1.94082e-36	0.375909	0.538	0.438	3.88163e-33	4	Cxcl16
3.63993e-33	-0.292842	0.611	0.611	7.27987e-30	4	Racgap1
1.10339e-32	0.302863	0.821	0.793	2.20677e-29	4	Igf1
1.48383e-32	-0.311319	0.467	0.506	2.96766e-29	4	Hsd11b2
1.60833e-31	-0.305198	0.438	0.502	3.21666e-28	4	Cdc20
5.05059e-31	0.356017	0.72	0.704	1.01012e-27	4	Id2
1.7741e-28	0.371739	0.605	0.574	3.54821e-25	4	Vldlr
7.23661e-28	-0.287801	0.627	0.759	1.44732e-24	4	H2-K1
1.14585e-25	0.495643	0.539	0.434	2.2917e-22	4	Aspn
1.1562e-25	0.262366	0.549	0.449	2.31239e-22	4	Gas1
1.46657e-24	-0.253557	0.495	0.52	2.93314e-21	4	Ramp1
1.78424e-24	0.333934	0.681	0.651	3.56848e-21	4	Sat1
2.18534e-24	-0.313312	0.416	0.473	4.37069e-21	4	Gsta4
1.49033e-23	0.303839	0.597	0.59	2.98066e-20	4	Adamtsl2
3.27081e-23	0.269659	0.518	0.43	6.54162e-20	4	Tgfb2
3.59396e-22	-0.308488	0.718	0.768	7.18792e-19	4	Dock4
3.90104e-22	-0.255616	0.663	0.781	7.80208e-19	4	Arl6ip1
4.77206e-22	-0.293172	0.572	0.571	9.54411e-19	4	Nusap1
2.06152e-21	-0.269358	0.49	0.516	4.12304e-18	4	Ptp4a3
7.10518e-21	0.296604	0.637	0.652	1.42104e-17	4	Grb10
1.32649e-20	0.270647	0.674	0.628	2.65298e-17	4	Nfkbiz
4.52035e-20	-0.250994	0.537	0.559	9.04069e-17	4	Cdca3
7.12284e-20	-0.277421	0.596	0.628	1.42457e-16	4	Hmmr
1.92598e-19	-0.257372	0.516	0.574	3.85196e-16	4	Mustn1
3.4988e-19	0.41521	0.509	0.408	6.9976e-16	4	Spon1
4.90999e-19	-0.289521	0.275	0.324	9.81997e-16	4	Ctla2a
1.49792e-18	-0.299882	0.59	0.592	2.99583e-15	4	Scarb1
7.00912e-18	0.289673	0.884	0.851	1.40182e-14	4	Pim1
2.37221e-16	0.36697	0.577	0.598	4.74443e-13	4	Rbp4
5.94257e-16	-0.275545	0.685	0.688	1.18851e-12	4	Rap2b
3.08833e-15	0.343088	0.71	0.7	6.17666e-12	4	Gm26532
8.94516e-15	0.319608	0.505	0.465	1.78903e-11	4	Clec14a
1.72438e-14	0.406185	0.861	0.851	3.44877e-11	4	Dnajb1
8.33561e-13	0.275865	0.581	0.569	1.66712e-09	4	Lbh
9.99437e-13	-0.26452	0.427	0.459	1.99887e-09	4	Apold1
2.91466e-12	-0.251538	0.582	0.551	5.82933e-09	4	Tdrp
3.19891e-12	-0.253655	0.615	0.565	6.39782e-09	4	Irx3
3.1883e-11	0.745892	0.568	0.568	6.37661e-08	4	Hspa1b
4.80282e-11	0.30773	0.611	0.642	9.60564e-08	4	Cyp1b1
8.31873e-11	-0.254969	0.451	0.376	1.66375e-07	4	Cldn5
1.56412e-10	0.339091	0.494	0.433	3.12823e-07	4	Twist1
3.1109e-08	-0.285669	0.652	0.675	6.2218e-05	4	Fbn2
4.98829e-08	0.347702	0.555	0.589	9.97658e-05	4	Maf
3.64764e-06	-0.252533	0.578	0.555	0.00729529	4	Espn
4.07515e-05	-0.265773	0.575	0.579	0.081503	4	Cav1
5.6632e-05	-0.276308	0.71	0.62	0.113264	4	Spc24
9.58425e-05	0.257438	0.665	0.737	0.191685	4	Arrdc3
0.00238233	-0.306031	0.686	0.632	1	4	Gramd1b
0.00280932	-0.261762	0.423	0.434	1	4	Srgn
0.00307932	0.351949	0.405	0.389	1	4	Efemp1
0.00676734	0.321856	0.456	0.417	1	4	Cdkn1c
0.00925606	0.289383	0.393	0.262	1	4	Pi15
0	1.67433	0.987	0.811	0	5	Amh
0	1.41598	1	0.958	0	5	Inha
0	1.27033	0.964	0.598	0	5	Mcm3
0	1.22951	0.999	0.934	0	5	Mif
0	1.21249	0.993	0.745	0	5	Fam13a
0	1.1877	0.974	0.654	0	5	Mcm6
0	1.17565	1	0.858	0	5	Serpine2
0	1.10532	0.97	0.684	0	5	Lig1
0	1.09551	0.997	0.86	0	5	Ccnd2
0	1.05952	0.998	0.786	0	5	Ranbp1
0	1.05518	1	0.894	0	5	Map1b
0	1.04609	0.981	0.757	0	5	Kazald1
0	1.03875	1	0.886	0	5	Hspd1
0	1.02563	0.989	0.812	0	5	Fscn1
0	1.00683	0.973	0.621	0	5	Mcm7
0	0.994373	0.998	0.852	0	5	Ucp2
0	0.988441	0.994	0.796	0	5	Manf
0	0.987856	0.992	0.787	0	5	Carhsp1
0	0.986973	0.989	0.805	0	5	Tnni3
0	0.984985	0.798	0.534	0	5	Inhbb
0	0.982774	0.999	0.857	0	5	Stmn1
0	0.968321	1	0.957	0	5	Gapdh
0	0.957045	0.999	0.938	0	5	Hsp90b1
0	0.957023	0.994	0.777	0	5	Isyna1
0	0.94899	0.899	0.514	0	5	Hells
0	0.936754	0.999	0.901	0	5	Cyb5a
0	0.931982	0.996	0.818	0	5	Socs2
0	0.926852	0.977	0.777	0	5	Fst
0	0.92033	0.996	0.822	0	5	Bex4
0	0.91002	0.973	0.572	0	5	Ppa1
0	0.909223	0.998	0.859	0	5	Ran
0	0.906326	0.999	0.914	0	5	Htra1
0	0.904966	0.92	0.572	0	5	Mcm5
0	0.90481	0.974	0.652	0	5	Dut
0	0.903907	0.971	0.709	0	5	Eno1
0	0.900443	0.882	0.658	0	5	Nap1l5
0	0.891556	0.94	0.667	0	5	Kctd14
0	0.872136	0.898	0.679	0	5	Slc38a5
0	0.865209	0.997	0.913	0	5	Serpinb6a
0	0.85621	0.928	0.681	0	5	Wfdc10
0	0.849668	0.999	0.845	0	5	Txnl1
0	0.843652	1	0.945	0	5	H2afz
0	0.841941	0.999	0.887	0	5	Tuba1b
0	0.836912	0.966	0.81	0	5	Apoa4
0	0.833429	0.947	0.788	0	5	Apoa1
0	0.81697	0.979	0.754	0	5	Slc18a2
0	0.81575	0.832	0.625	0	5	Nnat
0	0.801854	0.988	0.854	0	5	Cables1
0	0.79618	0.993	0.85	0	5	Psma2
0	0.794315	0.982	0.784	0	5	Cndp2
0	0.793743	0.893	0.626	0	5	Mycl
0	0.790789	0.938	0.559	0	5	Hsd17b1
0	0.777855	0.995	0.836	0	5	Tpi1
0	0.768231	0.997	0.885	0	5	Rgs2
0	0.767318	0.967	0.72	0	5	Pgk1
0	0.75137	0.896	0.581	0	5	Mcm4
0	0.747666	0.914	0.662	0	5	Tex15
0	0.745894	0.987	0.801	0	5	Nr5a2
0	0.744176	0.889	0.64	0	5	Cnmd
0	0.741658	0.975	0.668	0	5	Dctpp1
0	0.741566	0.988	0.751	0	5	Scd2
0	0.723975	0.963	0.733	0	5	Myo1e
0	0.709178	0.976	0.812	0	5	Derl3
0	0.708731	0.959	0.734	0	5	Ptpre
0	0.706403	0.86	0.571	0	5	Ung
0	0.703968	0.998	0.901	0	5	Ldha
0	0.688416	0.974	0.759	0	5	Arhgap28
0	0.688334	0.809	0.573	0	5	Ihh
0	0.682223	0.934	0.684	0	5	Tox2
0	0.679431	0.837	0.546	0	5	Uhrf1
0	0.667431	0.968	0.733	0	5	Ephx2
0	0.660528	0.986	0.803	0	5	Amhr2
0	0.641408	0.914	0.724	0	5	Fabp5
0	0.639197	0.999	0.879	0	5	Gja1
0	0.638511	0.833	0.572	0	5	Pclaf
0	0.638362	0.939	0.674	0	5	Evc2
0	0.638235	0.971	0.716	0	5	Nasp
0	0.632957	0.764	0.56	0	5	Dsp
0	0.62801	0.802	0.528	0	5	Defb19
0	0.627745	0.935	0.74	0	5	Ptges
0	0.623307	0.827	0.586	0	5	Fam81a
0	0.620514	0.958	0.64	0	5	Mex3c
0	0.617597	1	0.965	0	5	Akr1cl
0	0.614069	1	0.954	0	5	Tubb5
0	0.610775	0.849	0.591	0	5	Car14
0	0.607214	0.887	0.567	0	5	Creld2
0	0.605627	0.825	0.441	0	5	Mcm2
0	0.604665	0.929	0.732	0	5	Arhgdig
0	0.600086	0.821	0.482	0	5	Dhfr
0	0.592623	0.985	0.783	0	5	Igf1
0	0.588977	0.893	0.602	0	5	Ano4
0	0.588011	0.999	0.897	0	5	Chchd10
0	0.587453	0.977	0.796	0	5	Arhgap29
0	0.581253	0.955	0.73	0	5	Myo1b
0	0.580797	0.95	0.706	0	5	Nt5dc2
0	0.575324	0.896	0.625	0	5	Rpa2
0	0.569074	0.902	0.662	0	5	Tmem184a
0	0.567719	0.938	0.632	0	5	C1galt1
0	0.562575	0.957	0.647	0	5	Cks1b
0	0.561368	0.843	0.545	0	5	Gmnn
0	0.559046	0.967	0.716	0	5	Selenoh
0	0.555064	0.852	0.538	0	5	Dnmt1
0	0.543379	0.876	0.567	0	5	Dnph1
0	0.539211	0.876	0.707	0	5	Rasl10a
0	0.537014	0.991	0.825	0	5	Hjurp
0	0.533811	0.891	0.661	0	5	Synpo
0	0.529876	0.874	0.528	0	5	Dnajc9
0	0.527313	0.906	0.624	0	5	Phgdh
0	0.526262	0.968	0.831	0	5	Mlf1
0	0.517037	0.921	0.713	0	5	Zfp277
0	0.516303	0.837	0.65	0	5	Rgcc
0	0.511172	0.841	0.624	0	5	E2f1
0	0.500794	0.884	0.549	0	5	Slc25a13
0	0.495568	0.91	0.663	0	5	Rnf19b
0	0.490471	0.89	0.601	0	5	Usp1
0	0.488849	0.768	0.443	0	5	Sdf2l1
0	0.477206	0.854	0.524	0	5	Dpf3
0	0.474209	0.779	0.464	0	5	Chaf1b
0	0.473381	0.982	0.825	0	5	Dek
0	0.470455	0.785	0.504	0	5	Nrn1
0	0.466285	0.999	0.926	0	5	Hmgb1
0	0.465978	0.838	0.666	0	5	Dnajb13
0	0.462331	0.935	0.594	0	5	Hmgn2
0	0.455601	0.797	0.524	0	5	Gins2
0	0.451524	0.789	0.536	0	5	Chaf1a
0	0.447793	0.813	0.635	0	5	Bex1
0	0.446513	0.883	0.654	0	5	Jam2
0	0.444103	0.964	0.778	0	5	Odc1
0	0.430188	0.808	0.452	0	5	Tipin
0	0.425918	0.884	0.646	0	5	Ezh2
0	0.425123	0.914	0.728	0	5	Nexmif
0	0.412542	0.857	0.629	0	5	Atad2
0	0.411883	0.828	0.495	0	5	Tyms
0	0.410554	0.75	0.498	0	5	Ank1
0	0.404331	0.92	0.693	0	5	Mdfic
0	0.402948	0.887	0.583	0	5	Msmo1
0	0.400715	0.766	0.528	0	5	Stra6
0	0.395077	0.886	0.747	0	5	Tex14
0	0.394147	0.779	0.54	0	5	Dtl
0	0.393361	0.962	0.739	0	5	Ank3
0	0.391379	0.706	0.433	0	5	Cdt1
0	0.389648	0.863	0.588	0	5	Rrm1
0	0.38938	0.899	0.681	0	5	Gprasp1
0	0.382952	0.89	0.616	0	5	Lmnb1
0	0.378687	0.805	0.52	0	5	Mybpc3
0	0.373488	0.828	0.574	0	5	Adgrg1
0	0.371143	0.845	0.599	0	5	Chp2
0	0.371021	0.849	0.589	0	5	Rfc4
0	0.367821	0.873	0.604	0	5	Etnk2
0	0.366892	0.832	0.649	0	5	Fndc5
0	0.366021	0.753	0.499	0	5	Brca2
0	0.362185	0.866	0.602	0	5	Tmem97
0	0.356664	0.896	0.696	0	5	Arhgef28
0	0.346189	0.857	0.621	0	5	Gramd1b
0	0.34411	0.837	0.545	0	5	Kcnk1
0	0.339671	0.778	0.505	0	5	Topbp1
0	0.337671	0.802	0.552	0	5	Igfbp2
0	0.337109	0.969	0.788	0	5	Fbln1
0	0.32689	0.812	0.521	0	5	Pcna
0	0.318806	0.815	0.541	0	5	Ddx39
0	0.316672	0.818	0.521	0	5	Smc2
0	0.307281	0.82	0.62	0	5	Krt8
0	0.300812	0.809	0.622	0	5	Cenpm
0	0.300182	0.796	0.527	0	5	Sema3g
0	0.299234	0.899	0.662	0	5	Fdxr
0	0.299102	0.995	0.85	0	5	Ivns1abp
0	0.262311	0.817	0.606	0	5	Mpped2
0	-0.279642	0.27	0.582	0	5	Serpine1
1.5592e-307	0.450372	0.936	0.724	3.1184e-304	5	Myo10
7.98405e-307	0.319449	0.73	0.491	1.59681e-303	5	Prim1
5.48138e-305	0.286987	0.812	0.706	1.09628e-301	5	Sel1l3
4.36927e-300	0.277381	0.748	0.545	8.73855e-297	5	Clspn
5.68716e-300	0.257412	0.716	0.499	1.13743e-296	5	Syce2
8.30737e-299	0.480012	0.802	0.657	1.66147e-295	5	Cst12
3.97856e-298	0.33829	0.776	0.514	7.95712e-295	5	Fdps
1.27636e-294	0.475891	0.998	0.849	2.55271e-291	5	Ldhb
4.33784e-291	0.310556	0.8	0.53	8.67568e-288	5	Slc38a1
1.02497e-285	0.515037	0.707	0.47	2.04993e-282	5	Spin2c
5.01506e-281	0.322269	0.946	0.699	1.00301e-277	5	Tmpo
9.28848e-278	0.501513	0.869	0.677	1.8577e-274	5	Rap2b
2.86416e-275	0.561339	0.767	0.493	5.72831e-272	5	Inhba
5.15708e-274	0.540826	0.977	0.816	1.03142e-270	5	Kcnq1ot1
7.0458e-270	0.311891	0.977	0.754	1.40916e-266	5	Nucks1
1.34448e-266	0.335973	0.997	0.89	2.68895e-263	5	Ywhaq
1.92497e-259	0.374848	0.84	0.584	3.84993e-256	5	Dnajb14
4.96564e-254	0.497339	0.77	0.502	9.93128e-251	5	Vcan
1.06342e-246	0.367814	1	0.968	2.12683e-243	5	Ctsl
2.69582e-242	0.301691	0.722	0.583	5.39164e-239	5	Slc38a3
1.08995e-239	0.258182	0.808	0.679	2.1799e-236	5	C130074G19Rik
9.45319e-238	0.294258	0.649	0.487	1.89064e-234	5	Cdc6
4.72386e-235	-0.297183	0.443	0.636	9.44772e-232	5	Dtx4
4.66277e-234	0.332961	0.737	0.489	9.32554e-231	5	Hsd11b2
1.77816e-230	0.442438	0.85	0.628	3.55631e-227	5	Mid1ip1
1.72709e-221	0.251914	0.768	0.64	3.45418e-218	5	Mctp1
3.03401e-217	-0.297162	0.476	0.641	6.06801e-214	5	Wfdc1
4.81147e-215	0.375621	0.643	0.417	9.62295e-212	5	Fgfbp3
4.71925e-210	0.372151	0.744	0.507	9.43851e-207	5	Gtf2a1
8.29147e-210	-0.254725	0.267	0.541	1.65829e-206	5	Aoc3
1.21858e-205	0.25644	0.814	0.65	2.43717e-202	5	Rasgef1b
2.76563e-202	0.272912	0.641	0.44	5.53126e-199	5	Fen1
5.70731e-201	0.255007	0.823	0.689	1.14146e-197	5	Ubash3b
6.70155e-200	-0.260269	0.418	0.608	1.34031e-196	5	Rrad
1.52358e-199	0.271106	0.873	0.68	3.04716e-196	5	Metrnl
1.99214e-176	0.250074	0.824	0.63	3.98428e-173	5	Hpgd
2.47743e-135	-0.254248	0.358	0.491	4.95485e-132	5	Dpt
1.4633e-134	0.284636	0.642	0.506	2.92661e-131	5	Cyp2s1
2.84166e-131	-0.263888	0.4	0.549	5.68332e-128	5	Bdnf
1.87211e-129	0.25976	0.613	0.421	3.74421e-126	5	Aard
6.31342e-114	-0.267104	0.288	0.467	1.26268e-110	5	Apold1
1.85268e-113	0.308213	0.589	0.434	3.70536e-110	5	Bex2
5.95772e-96	-0.288945	0.286	0.493	1.19154e-92	5	Wnt5a
2.14802e-73	-0.271764	0.402	0.539	4.29605e-70	5	1500009L16Rik
2.09319e-67	-0.260382	0.251	0.419	4.18638e-64	5	Fcer1g
2.99645e-63	-0.257844	0.536	0.371	5.9929e-60	5	Cldn5
6.63846e-59	-0.282079	0.497	0.546	1.32769e-55	5	Adcy7
1.58963e-45	-0.253203	0.587	0.59	3.17925e-42	5	Ndrg1
1.82291e-41	-0.280789	0.441	0.533	3.64581e-38	5	Egr3
5.15865e-41	-0.287594	0.432	0.501	1.03173e-37	5	Sox11
7.31196e-35	-0.278601	0.614	0.679	1.46239e-31	5	Trib1
3.35636e-27	-0.254012	0.478	0.578	6.71271e-24	5	6030408B16Rik
7.20475e-27	-0.253257	0.536	0.612	1.44095e-23	5	Ntng1
1.13172e-26	-0.295799	0.535	0.591	2.26344e-23	5	Stox2
2.11489e-24	-0.277329	0.882	0.786	4.22979e-21	5	Mmp11
7.38135e-22	-0.285415	0.572	0.621	1.47627e-18	5	Usp2
5.39799e-18	-0.258602	0.677	0.619	1.0796e-14	5	Bcam
9.22224e-18	-0.29066	0.619	0.619	1.84445e-14	5	Tpx2
1.29036e-17	-0.287894	0.625	0.651	2.58072e-14	5	Fbxo32
3.14807e-16	-0.28005	0.527	0.5	6.29613e-13	5	Dnm3os
5.07819e-15	-0.250257	0.49	0.45	1.01564e-11	5	Egfl7
2.30031e-13	-0.279056	0.388	0.439	4.60062e-10	5	Twist1
1.32104e-12	-0.293324	0.489	0.517	2.64208e-09	5	Pdlim3
1.02268e-11	-0.255041	0.735	0.64	2.04535e-08	5	H2afx
1.53046e-11	-0.286221	0.492	0.524	3.06092e-08	5	1190002N15Rik
5.02859e-11	-0.275194	0.537	0.567	1.00572e-07	5	Zdbf2
3.06319e-10	-0.267096	0.825	0.747	6.12638e-07	5	H2-K1
1.12151e-09	-0.258547	0.466	0.407	2.24303e-06	5	Esam
1.25012e-09	-0.255793	0.661	0.624	2.50025e-06	5	Hmmr
1.02476e-08	-0.278362	0.421	0.454	2.04952e-05	5	Gm26802
1.05691e-06	-0.252212	0.521	0.482	0.00211381	5	Cpz
4.86596e-06	-0.283035	0.681	0.599	0.00973191	5	H2-D1
1.24337e-05	-0.257497	0.636	0.621	0.0248675	5	Ctgf
2.02932e-05	-0.250401	0.922	0.852	0.0405864	5	Grb14
2.82814e-05	-0.257922	0.25	0.363	0.0565628	5	Ifi203
0.000420488	-0.285315	0.693	0.634	0.840976	5	Id1
0.000547732	-0.296393	0.507	0.44	1	5	Lmcd1
0.000807682	-0.259857	0.679	0.618	1	5	Peg3
0.0011753	-0.296071	0.296	0.323	1	5	Ctla2a
0.00776281	-0.28111	0.553	0.468	1	5	Ndufa4l2
0.00904347	-0.254975	0.63	0.613	1	5	Rasl11b
0.00929713	-0.2605	0.638	0.643	1	5	Hs6st2
0	1.11199	0.999	0.997	0	6	Malat1
0	-0.253228	0.096	0.502	0	6	Psmb8
0	-0.28304	0.176	0.566	0	6	Gbp7
0	-0.312564	0.067	0.451	0	6	Emcn
0	-0.356195	0.212	0.623	0	6	Prelp
0	-0.370796	0.286	0.615	0	6	Rbp4
0	-0.395913	0.073	0.524	0	6	Creb3l1
0	-0.419291	0.333	0.735	0	6	Tmpo
1.26754e-304	1.4147	0.846	0.746	2.53507e-301	6	Ank3
1.73792e-301	-0.416222	0.564	0.838	3.47583e-298	6	Fscn1
5.74828e-301	-0.322212	0.331	0.635	1.14966e-297	6	Usp2
2.25209e-297	1.72486	0.844	0.824	4.50419e-294	6	Kcnq1ot1
1.53043e-294	-0.403462	0.348	0.698	3.06087e-291	6	Gem
1.4432e-289	-0.366233	0.419	0.742	2.88641e-286	6	Eno1
2.81603e-283	-0.252098	0.167	0.506	5.63206e-280	6	Pde10a
1.08861e-276	-0.257853	0.273	0.602	2.17722e-273	6	Ccnb2
5.61787e-273	-0.422111	0.209	0.621	1.12357e-269	6	Fdx1
1.02441e-272	-0.423058	0.331	0.628	2.04882e-269	6	Actr3b
7.56269e-271	-0.356416	0.044	0.347	1.51254e-267	6	Lyz2
6.51304e-269	-0.26228	0.325	0.754	1.30261e-265	6	Nasp
3.06255e-268	-0.281384	0.287	0.642	6.12509e-265	6	Ugdh
2.1485e-262	-0.269383	0.246	0.589	4.29701e-259	6	Lbh
1.21295e-257	-0.302248	0.294	0.603	2.42591e-254	6	Glipr2
6.86691e-251	-0.288692	0.389	0.768	1.37338e-247	6	Ephx2
8.86745e-246	-0.277478	0.335	0.63	1.77349e-242	6	Rasl11b
5.8751e-239	-0.426295	0.341	0.616	1.17502e-235	6	Loxl1
9.76425e-239	-0.408005	0.595	0.869	1.95285e-235	6	Txnl1
2.83186e-238	-0.381299	0.551	0.787	5.66373e-235	6	Arl6ip1
1.08064e-236	-0.287817	0.359	0.647	2.16129e-233	6	Nfkbiz
1.78333e-236	-0.390279	0.452	0.702	3.56667e-233	6	Ccdc80
3.49649e-236	-0.337964	0.352	0.608	6.99299e-233	6	Foxs1
3.93722e-234	2.99678	0.806	0.845	7.87443e-231	6	Gm26917
5.93379e-232	-0.267081	0.439	0.663	1.18676e-228	6	Heyl
2.80789e-225	-0.417872	0.449	0.741	5.61578e-222	6	Ddit4l
3.15845e-225	-0.426291	0.444	0.64	6.3169e-222	6	Akr1b8
4.05044e-225	-0.267891	0.286	0.599	8.10089e-222	6	4930523C07Rik
1.01662e-219	-0.398945	0.516	0.719	2.03325e-216	6	Serpinb6b
1.76929e-217	-0.378286	0.345	0.589	3.53858e-214	6	Ntrk2
2.78024e-211	0.765395	0.975	0.959	5.56047e-208	6	Inha
8.73469e-210	-0.321647	0.622	0.795	1.74694e-206	6	Agt
2.00559e-208	-0.372115	0.249	0.552	4.01117e-205	6	Hhip
3.02282e-207	-0.337625	0.368	0.618	6.04565e-204	6	Smtn
9.94961e-204	-0.289753	0.193	0.489	1.98992e-200	6	Ndufa4l2
2.17722e-202	-0.36018	0.39	0.772	4.35445e-199	6	Tacc1
5.86835e-201	-0.425891	0.372	0.604	1.17367e-197	6	Lamc3
1.74813e-194	1.03235	0.947	0.992	3.49626e-191	6	Gm42418
2.1758e-194	-0.312827	0.373	0.647	4.3516e-191	6	Lmnb1
8.51422e-194	-0.376472	0.605	0.81	1.70284e-190	6	Ranbp1
7.22422e-193	-0.365947	0.437	0.684	1.44484e-189	6	Dut
2.30102e-186	-0.353892	0.343	0.587	4.60205e-183	6	Eng
1.63812e-183	-0.324337	0.449	0.65	3.27623e-180	6	Tuba1c
1.72656e-182	-0.301897	0.5	0.637	3.45312e-179	6	Serpina3g
1.87513e-182	-0.278991	0.254	0.555	3.75027e-179	6	Smc2
1.73981e-181	-0.331799	0.435	0.678	3.47962e-178	6	Cks1b
1.40871e-177	0.279191	0.667	0.6	2.81742e-174	6	Reln
3.49103e-177	-0.273464	0.403	0.634	6.98205e-174	6	Cxcl10
2.42203e-173	-0.324012	0.456	0.634	4.84405e-170	6	Hist1h1c
7.04113e-173	-0.404291	0.355	0.629	1.40823e-169	6	Hmgn2
2.85599e-172	-0.399471	0.325	0.602	5.71198e-169	6	Pclaf
1.23205e-167	-0.366461	0.346	0.585	2.4641e-164	6	6030408B16Rik
7.02033e-166	-0.353236	0.216	0.515	1.40407e-162	6	Iigp1
1.41197e-165	-0.264408	0.516	0.715	2.82393e-162	6	Cotl1
5.7455e-165	1.24823	0.918	0.884	1.1491e-161	6	Gja1
3.93928e-164	-0.319049	0.592	0.777	7.87856e-161	6	Kcnk2
4.74949e-163	-0.266358	0.425	0.653	9.49898e-160	6	Phgdh
1.16066e-162	-0.355399	0.433	0.619	2.32132e-159	6	S100a16
9.76389e-162	-0.254462	0.25	0.516	1.95278e-158	6	Dnm3os
1.05022e-159	-0.284134	0.536	0.715	2.10044e-156	6	Dusp5
1.32217e-159	-0.350564	0.335	0.544	2.64433e-156	6	Col26a1
3.89725e-159	-0.339261	0.393	0.595	7.7945e-156	6	Crem
3.37498e-156	-0.25333	0.413	0.645	6.74997e-153	6	Ccdc34
2.33647e-151	-0.282571	0.463	0.618	4.67293e-148	6	Tmem119
1.49083e-149	-0.392584	0.259	0.525	2.98166e-146	6	Isg15
6.41899e-148	-0.28535	0.275	0.524	1.2838e-144	6	Ncam1
1.0838e-147	-0.31621	0.222	0.519	2.1676e-144	6	Ier5l
8.68627e-147	1.22011	0.851	0.858	1.73725e-143	6	Ivns1abp
2.14668e-145	-0.393572	0.492	0.651	4.29335e-142	6	Pltp
6.35751e-142	-0.291671	0.374	0.582	1.2715e-138	6	Mustn1
2.57943e-139	-0.332476	0.668	0.906	5.15885e-136	6	Hspd1
3.45119e-139	-0.268322	0.324	0.578	6.90238e-136	6	Egr2
4.39893e-134	-0.276339	0.135	0.332	8.79786e-131	6	Ctla2a
2.58757e-133	-0.337662	0.77	0.9	5.17515e-130	6	Nupr1
6.70253e-133	-0.358162	0.772	0.899	1.34051e-129	6	Csrp2
7.66156e-132	-0.367648	0.369	0.578	1.53231e-128	6	Fbln5
4.50883e-130	-0.298267	0.383	0.565	9.01766e-127	6	Colec11
1.65708e-126	-0.273791	0.317	0.551	3.31416e-123	6	Cenpa
2.40242e-122	-0.35284	0.375	0.591	4.80484e-119	6	Cav1
3.72669e-122	-0.325436	0.571	0.692	7.45338e-119	6	Dctpp1
7.11373e-122	-0.39175	0.306	0.547	1.42275e-118	6	Tgfbi
2.93232e-121	1.28342	0.791	0.763	5.86464e-118	6	Dock4
1.3309e-120	-0.361394	0.47	0.6	2.66179e-117	6	Cd24a
4.38064e-116	0.38393	0.388	0.661	8.76127e-113	6	Ank2
9.00827e-115	-0.289816	0.18	0.46	1.80165e-111	6	Lmcd1
3.19074e-114	0.921832	0.875	0.901	6.38147e-111	6	Map1b
5.84835e-114	0.316548	0.414	0.71	1.16967e-110	6	Gprasp1
2.00169e-113	0.899084	0.753	0.746	4.00339e-110	6	Ptpre
9.6814e-113	-0.27704	0.38	0.556	1.93628e-109	6	Pde5a
1.00555e-112	-0.309748	0.378	0.574	2.01111e-109	6	Hist1h2bc
2.61711e-112	-0.307013	0.312	0.526	5.23423e-109	6	Ptp4a3
1.57507e-110	-0.270039	0.294	0.506	3.15015e-107	6	Ets1
2.10325e-109	-0.280667	0.304	0.508	4.20649e-106	6	Sox11
1.30823e-108	-0.330003	0.391	0.598	2.61645e-105	6	Maf
2.11976e-108	0.928088	0.871	0.866	4.23952e-105	6	Serpine2
6.42096e-104	-0.316926	0.475	0.647	1.28419e-100	6	Id1
2.01998e-103	-0.26084	0.428	0.658	4.03996e-100	6	Birc5
2.38013e-103	-0.414775	0.505	0.585	4.76027e-100	6	Nhsl2
4.66307e-102	-0.409716	0.262	0.488	9.32613e-99	6	Mt2
6.09373e-98	-0.278241	0.534	0.631	1.21875e-94	6	Dtx4
2.59542e-95	-0.371482	0.785	0.897	5.19083e-92	6	Rgs2
2.18036e-93	-0.381295	0.425	0.565	4.36073e-90	6	Srpx2
1.22405e-92	-0.283666	0.534	0.667	2.4481e-89	6	Ccdc3
5.01632e-88	-0.299241	0.341	0.545	1.00326e-84	6	Cks2
2.42898e-87	-0.352646	0.297	0.472	4.85795e-84	6	Ebf1
9.33147e-86	-0.304203	0.488	0.641	1.86629e-82	6	Phlda1
1.69094e-84	-0.292116	0.255	0.481	3.38189e-81	6	Carmn
2.72936e-84	0.373254	0.311	0.563	5.45872e-81	6	Inhbb
4.14009e-84	0.974474	0.924	0.973	8.28017e-81	6	Ctsl
4.11712e-80	0.294122	0.191	0.333	8.23424e-77	6	Scube1
1.04297e-79	0.336028	0.301	0.527	2.08593e-76	6	Cyp2s1
2.14214e-79	0.555767	0.326	0.604	4.28427e-76	6	Adgrg1
4.76512e-78	-0.376864	0.467	0.613	9.53025e-75	6	Col5a2
1.20061e-76	0.294892	0.679	0.691	2.40122e-73	6	Edn1
1.28773e-76	-0.329909	0.273	0.463	2.57546e-73	6	Egfl7
4.24853e-75	-0.25804	0.437	0.584	8.49705e-72	6	Vldlr
9.34578e-74	-0.297714	0.468	0.618	1.86916e-70	6	Smc4
5.10446e-72	-0.404188	0.598	0.743	1.02089e-68	6	Fabp5
5.78881e-72	1.27642	0.569	0.521	1.15776e-68	6	mt-Nd6
2.96349e-71	0.77033	0.779	0.789	5.92699e-68	6	Fst
5.90498e-70	-0.304095	0.221	0.439	1.181e-66	6	Gm10600
6.13807e-70	-0.293314	0.315	0.508	1.22761e-66	6	Kctd12
5.08083e-69	0.725524	0.885	0.907	1.01617e-65	6	Clu
1.0632e-68	-0.264407	0.723	0.799	2.1264e-65	6	Igf1
1.21698e-68	-0.417716	0.577	0.614	2.43396e-65	6	Cryab
1.38711e-65	-0.343891	0.333	0.515	2.77422e-62	6	Lgals7
1.58351e-64	-0.376268	0.372	0.526	3.16702e-61	6	Plac8
3.76653e-64	0.494963	0.326	0.558	7.53306e-61	6	Slc38a1
2.9251e-61	0.266676	0.414	0.647	5.8502e-58	6	Gata6
1.05519e-60	0.340673	0.457	0.76	2.11039e-57	6	Myo1b
1.66182e-60	0.337547	0.317	0.51	3.32364e-57	6	Fbxo21
2.32176e-59	-0.296772	0.441	0.576	4.64353e-56	6	Hspa1b
7.05663e-56	-0.403762	0.435	0.547	1.41133e-52	6	Prss35
7.27805e-54	0.26595	0.546	0.511	1.45561e-50	6	Ptprz1
1.43848e-52	-0.266445	0.66	0.842	2.87697e-49	6	Bex4
2.75575e-52	1.14901	0.691	0.771	5.51149e-49	6	Slc18a2
3.20945e-52	0.289045	0.481	0.711	6.4189e-49	6	Tox2
1.39749e-51	0.31959	0.392	0.582	2.79497e-48	6	Armcx5
5.11518e-51	0.42991	0.507	0.767	1.02304e-47	6	2810474O19Rik
5.32054e-51	0.45919	0.398	0.61	1.06411e-47	6	Dnajb14
2.22431e-49	0.279884	0.605	0.81	4.44863e-46	6	Fbln1
1.30564e-48	-0.321485	0.479	0.543	2.61128e-45	6	Hic1
2.83065e-48	-0.27896	0.274	0.463	5.66131e-45	6	Lbp
1.06216e-45	1.17938	0.629	0.663	2.12432e-42	6	Meg3
1.93831e-45	-0.347466	0.409	0.547	3.87663e-42	6	Pcp4l1
2.15861e-44	0.651167	0.77	0.825	4.31722e-41	6	Derl3
4.94919e-44	-0.250164	0.227	0.431	9.89838e-41	6	Cdkn1c
2.32296e-43	0.387468	0.509	0.705	4.64591e-40	6	AC160336.1
3.27188e-43	0.313068	0.357	0.538	6.54376e-40	6	Pcsk6
3.17921e-41	-0.307483	0.644	0.826	6.35841e-38	6	Tnni3
4.37754e-41	0.634083	0.269	0.429	8.75509e-38	6	Gm37350
4.40505e-41	0.255622	0.467	0.698	8.8101e-38	6	Prkar2b
1.2037e-40	-0.270616	0.399	0.525	2.40741e-37	6	Tgfbr2
3.03229e-40	0.575062	0.469	0.687	6.06459e-37	6	Synpo
4.6626e-40	-0.329259	0.591	0.622	9.32521e-37	6	Emp1
4.71369e-40	0.996462	0.796	0.837	9.42738e-37	6	Hjurp
2.07837e-37	0.327417	0.402	0.58	4.15675e-34	6	Zfp385b
6.29105e-37	0.7896	0.592	0.62	1.25821e-33	6	Mpped2
6.63967e-37	0.772321	0.714	0.775	1.32793e-33	6	Col9a2
7.96695e-37	-0.267203	0.443	0.536	1.59339e-33	6	1500009L16Rik
4.24726e-36	0.456996	0.483	0.659	8.49452e-33	6	C1galt1
1.10229e-35	-0.291926	0.481	0.58	2.20458e-32	6	Clec1a
9.81576e-35	0.533845	0.565	0.82	1.96315e-31	6	Neat1
3.45304e-34	0.427476	0.655	0.604	6.90609e-31	6	Ntng1
3.89444e-34	0.410108	0.501	0.715	7.78888e-31	6	Wt1
4.72468e-34	-0.271075	0.356	0.494	9.44935e-31	6	Plk2
1.18468e-33	0.824273	0.714	0.827	2.36937e-30	6	Amh
1.99869e-32	0.59468	0.362	0.554	3.99737e-29	6	Dpf3
2.04282e-32	0.440925	0.658	0.715	4.08564e-29	6	Sel1l3
5.27948e-31	0.49034	0.492	0.66	1.0559e-27	6	D10Wsu102e
2.60426e-30	0.296141	0.357	0.527	5.20853e-27	6	Vcan
5.86821e-30	-0.303424	0.463	0.602	1.17364e-26	6	Cdca8
4.92616e-29	0.25515	0.414	0.573	9.85232e-26	6	Adgrf5
5.99425e-29	0.403444	0.619	0.787	1.19885e-25	6	Bcat1
9.98584e-29	0.69911	0.465	0.686	1.99717e-25	6	Fbn2
1.57546e-28	0.502598	0.394	0.551	3.15092e-25	6	Mical2
8.2283e-28	0.824378	0.672	0.702	1.64566e-24	6	Slc40a1
5.65303e-27	-0.299718	0.558	0.545	1.13061e-23	6	Cxcl2
4.63739e-26	-0.360962	0.511	0.569	9.27477e-23	6	Nr4a3
7.82592e-26	0.640018	0.447	0.646	1.56518e-22	6	Gramd1b
1.07216e-24	-0.251998	0.241	0.42	2.14432e-21	6	Esam
4.88523e-23	0.683107	0.462	0.667	9.77046e-20	6	Itga6
9.24489e-23	0.326944	0.537	0.733	1.84898e-19	6	Pik3r1
1.49808e-22	0.279215	0.291	0.433	2.99615e-19	6	Gatm
4.82621e-22	0.319636	0.492	0.606	9.65243e-19	6	Slc6a6
1.96049e-21	0.669131	0.443	0.63	3.92098e-18	6	Etnk2
4.93192e-21	0.364941	0.345	0.487	9.86385e-18	6	Hey2
8.71978e-20	0.323439	0.401	0.528	1.74396e-16	6	Net1
4.72709e-19	-0.265881	0.662	0.689	9.45418e-16	6	Mki67
1.0007e-18	-0.267617	0.337	0.451	2.0014e-15	6	Enpep
2.69457e-17	0.640069	0.62	0.679	5.38914e-14	6	Tex15
3.06407e-17	0.390717	0.685	0.785	6.12813e-14	6	Plagl1
3.17441e-17	0.503938	0.562	0.747	6.34883e-14	6	Myo10
3.32798e-17	0.932189	0.741	0.825	6.65596e-14	6	Thbs1
5.77193e-17	-0.298803	0.532	0.624	1.15439e-13	6	Tpx2
2.82445e-16	0.493849	0.906	0.964	5.6489e-13	6	Sox4
1.55882e-15	0.372129	0.352	0.428	3.11763e-12	6	Gm45889
4.22608e-15	0.307594	0.521	0.685	8.45215e-12	6	Tmem184a
1.15286e-14	0.273709	0.495	0.507	2.30573e-11	6	Cntn4
1.15766e-14	-0.250424	0.573	0.564	2.31532e-11	6	Serpine1
2.4256e-14	0.564707	0.519	0.719	4.85121e-11	6	Arhgef28
3.51505e-14	0.41411	0.636	0.745	7.0301e-11	6	Nexmif
7.51378e-14	-0.384599	0.563	0.536	1.50276e-10	6	Prrx1
9.41915e-14	-0.287144	0.447	0.507	1.88383e-10	6	Thbd
2.70667e-13	0.306047	0.547	0.669	5.41335e-10	6	Trib2
2.85649e-13	0.600232	0.795	0.865	5.71298e-10	6	Cables1
6.50696e-13	0.38994	0.634	0.817	1.30139e-09	6	Arhgap29
6.53401e-13	0.627335	0.595	0.62	1.3068e-09	6	Ano4
7.53138e-13	0.624289	0.472	0.658	1.50628e-09	6	Mctp1
1.30928e-12	0.385371	0.643	0.671	2.61856e-09	6	Sbno2
6.02153e-12	0.450264	0.7	0.735	1.20431e-08	6	Pik3ip1
1.62979e-11	0.640118	0.665	0.67	3.25959e-08	6	Ext1
2.5611e-11	0.289549	0.462	0.593	5.12221e-08	6	Ihh
6.11398e-11	0.461092	0.686	0.64	1.2228e-07	6	Ghr
1.08664e-10	-0.294357	0.212	0.379	2.17327e-07	6	Bambi
1.4938e-10	-0.359961	0.566	0.578	2.98761e-07	6	Lsp1
2.56246e-10	0.490312	0.516	0.667	5.12492e-07	6	Mex3c
4.3888e-10	0.655873	0.594	0.658	8.7776e-07	6	Cnmd
2.38881e-09	0.483933	0.661	0.737	4.77763e-06	6	Arrdc3
2.98742e-08	0.6099	0.393	0.508	5.97484e-05	6	Slc26a7
1.61392e-07	0.39205	0.28	0.306	0.000322784	6	Gm14226
3.51284e-07	-0.250271	0.353	0.441	0.000702568	6	Twist1
8.37068e-07	0.39298	0.716	0.825	0.00167414	6	Apoa4
1.86901e-06	0.374517	0.501	0.596	0.00373801	6	Sorbs2
2.27832e-06	0.303748	0.819	0.948	0.00455664	6	Hsp90b1
2.70745e-06	0.787473	0.418	0.563	0.0054149	6	Bicd1
4.74782e-06	0.762423	0.593	0.624	0.00949564	6	Ctgf
5.31681e-06	-0.286804	0.24	0.242	0.0106336	6	Ccl4
5.33457e-06	0.425115	0.405	0.5	0.0106691	6	Shtn1
1.54619e-05	0.379795	0.595	0.662	0.0309239	6	Gm17056
1.82537e-05	0.367472	0.474	0.511	0.0365074	6	Inhba
3.53664e-05	0.254989	0.343	0.406	0.0707328	6	Gm2044
4.21025e-05	0.474545	0.82	0.925	0.084205	6	Htra1
4.57942e-05	0.491917	0.742	0.794	0.0915885	6	Mmp11
0.000216432	-0.395192	0.626	0.691	0.432864	6	Top2a
0.000713106	-0.257789	0.499	0.48	1	6	Wnt5a
0.00112667	-0.372116	0.483	0.523	1	6	Hist1h1b
0.00322483	0.448145	0.705	0.772	1	6	Tdrd5
0.00328773	0.705968	0.733	0.774	1	6	Arhgap28
0.00721311	0.561979	0.672	0.82	1	6	Nr5a2
0.00844075	0.662213	0.616	0.689	1	6	Cyr61
0.00966202	0.315499	0.588	0.67	1	6	Limch1
0	1.8589	0.997	0.833	0	7	Mgp
0	1.81104	0.988	0.667	0	7	Igfbp6
0	1.66133	0.977	0.69	0	7	Ifitm1
0	1.64737	0.925	0.643	0	7	Hoxd9
0	1.4762	0.977	0.743	0	7	Mmp2
0	1.46187	0.995	0.898	0	7	Itih5
0	1.44449	0.967	0.671	0	7	Dcn
0	1.41728	1	0.885	0	7	Sparc
0	1.39415	0.991	0.751	0	7	Bgn
0	1.39123	0.959	0.603	0	7	Sparcl1
0	1.39033	0.954	0.848	0	7	Pim1
0	1.35632	0.956	0.757	0	7	Kcnk2
0	1.35383	0.967	0.627	0	7	Rbp1
0	1.31863	0.974	0.852	0	7	Pmepa1
0	1.28031	0.999	0.702	0	7	Col1a2
0	1.26705	0.966	0.636	0	7	Ogn
0	1.22027	0.909	0.661	0	7	Col4a4
0	1.21695	0.974	0.672	0	7	Mdk
0	1.16367	0.97	0.873	0	7	Lmna
0	1.14924	0.899	0.692	0	7	Wt1
0	1.14918	0.83	0.519	0	7	Lrrc17
0	1.1226	0.919	0.661	0	7	Icam1
0	1.11186	0.947	0.7	0	7	Slc9a3r2
0	1.10402	0.841	0.532	0	7	Pdgfra
0	1.06625	0.925	0.663	0	7	Socs3
0	1.05784	0.965	0.819	0	7	Serpinf1
0	1.05516	0.981	0.833	0	7	Rarres2
0	1.04658	0.996	0.876	0	7	Cfh
0	1.0462	0.8	0.505	0	7	Tcf21
0	1.04597	0.921	0.678	0	7	Wnt4
0	1.0205	0.966	0.624	0	7	Serping1
0	0.993333	0.97	0.918	0	7	Junb
0	0.987178	0.979	0.925	0	7	Fosb
0	0.939527	0.984	0.806	0	7	Ifitm3
0	0.926571	0.826	0.543	0	7	Srpx2
0	0.919321	0.826	0.517	0	7	Tgfbi
0	0.848907	0.869	0.706	0	7	Fxyd6
0	0.839326	0.919	0.707	0	7	Bicc1
0	0.838805	0.853	0.589	0	7	Nrp2
0	0.818101	0.919	0.657	0	7	Nid1
0	0.797058	0.745	0.467	0	7	Wnt5a
0	0.781072	0.726	0.397	0	7	Hoxd10
0	0.778343	0.864	0.594	0	7	Lum
0	0.773239	0.907	0.761	0	7	Selenop
0	0.76714	0.957	0.685	0	7	Gsn
0	0.748566	0.758	0.488	0	7	Ms4a4d
0	0.743831	0.967	0.773	0	7	Csrp1
0	0.743114	0.968	0.741	0	7	Cygb
0	0.724104	0.941	0.712	0	7	Pcolce
0	0.723567	0.865	0.603	0	7	Emilin1
0	0.721798	0.715	0.414	0	7	Tnc
0	0.699645	0.988	0.675	0	7	Col1a1
0	0.68122	0.956	0.658	0	7	Mfap4
0	0.65064	0.823	0.503	0	7	Gng11
0	0.640145	0.767	0.469	0	7	Cpz
0	0.603304	0.784	0.518	0	7	Col26a1
0	0.602451	0.855	0.605	0	7	Palld
0	0.513418	0.877	0.585	0	7	Prelp
0	0.4879	0.821	0.422	0	7	Coch
0	0.398184	0.87	0.621	0	7	Gm15866
0	0.300344	0.823	0.336	0	7	Rspo3
0	0.257609	0.821	0.409	0	7	Hoxd11
0	-0.277947	0.944	0.721	0	7	Tagln
1.38909e-305	0.323435	0.71	0.485	2.77819e-302	7	Fmo2
7.99146e-295	0.504952	0.857	0.621	1.59829e-291	7	Fblim1
1.05767e-285	0.980208	0.834	0.59	2.11535e-282	7	Ier5
1.84364e-284	0.366369	0.841	0.599	3.68728e-281	7	Cryab
1.56863e-271	0.740409	0.763	0.568	3.13726e-268	7	Lsp1
5.63186e-270	0.706805	0.832	0.635	1.12637e-266	7	Sfrp1
3.89988e-264	0.651643	0.913	0.793	7.79976e-261	7	2024-09-11
2.03927e-257	0.824277	0.891	0.724	4.07853e-254	7	Gm12840
1.73029e-250	0.619389	0.844	0.649	3.46057e-247	7	Fgl2
4.54349e-248	0.867611	0.851	0.692	9.08699e-245	7	Gm26532
3.01365e-247	0.264377	0.763	0.548	6.0273e-244	7	Rab20
5.23948e-241	0.802065	0.763	0.564	1.0479e-237	7	Clec1a
2.91162e-235	0.482135	0.775	0.62	5.82324e-232	7	Lox
5.94944e-232	0.540386	0.921	0.744	1.18989e-228	7	Gas6
3.56414e-228	0.756364	0.858	0.622	7.12828e-225	7	Cebpd
1.9166e-224	0.758718	0.747	0.525	3.8332e-221	7	Cdh11
1.01948e-219	0.536517	0.907	0.811	2.03896e-216	7	Gpx3
4.77662e-218	1.10455	0.969	0.876	9.55323e-215	7	Ier3
8.13351e-218	0.54894	0.854	0.669	1.6267e-214	7	Fhl2
9.92815e-218	0.604925	0.869	0.725	1.98563e-214	7	Eva1b
6.42894e-217	0.367012	0.687	0.375	1.28579e-213	7	Dpep1
8.93584e-215	0.431193	0.89	0.657	1.78717e-211	7	Fstl1
3.83351e-214	0.357198	0.785	0.58	7.66702e-211	7	Ifi27l2a
2.3191e-212	0.534619	0.881	0.706	4.6382e-209	7	Igfbp4
5.03968e-210	0.873678	0.977	0.947	1.00794e-206	7	Fos
5.61169e-210	1.04116	0.913	0.816	1.12234e-206	7	Klf4
1.02857e-209	0.274717	0.658	0.447	2.05714e-206	7	Col8a1
2.56612e-207	0.407378	0.779	0.595	5.13225e-204	7	Pdgfrb
1.26282e-206	0.582291	0.794	0.541	2.52565e-203	7	Gpc3
7.56677e-204	0.902215	0.956	0.892	1.51335e-200	7	Gadd45b
6.25681e-203	0.381298	0.801	0.613	1.25136e-199	7	Gm12216
9.41594e-203	0.440701	0.828	0.597	1.88319e-199	7	Htra3
1.05982e-202	-0.267462	0.273	0.507	2.11964e-199	7	Shtn1
2.33215e-192	1.11186	0.834	0.664	4.6643e-189	7	Nr4a2
1.15002e-191	0.310961	0.823	0.658	2.30005e-188	7	Cdkn1a
1.28337e-188	0.526319	0.768	0.56	2.56673e-185	7	Ramp2
1.50823e-187	-0.350672	0.519	0.746	3.01646e-184	7	Ehd4
1.60058e-186	0.745176	0.848	0.768	3.20117e-183	7	Itm2a
5.05208e-186	0.447942	0.835	0.663	1.01042e-182	7	Selenom
1.57931e-182	-0.279259	0.374	0.568	3.15862e-179	7	Cdca3
1.72715e-181	0.343185	0.695	0.439	3.4543e-178	7	Lbp
1.74752e-180	0.569593	0.821	0.646	3.49503e-177	7	Thbs4
4.85404e-176	0.442035	1	0.997	9.70807e-173	7	Malat1
9.61938e-173	0.426023	0.79	0.634	1.92388e-169	7	Pltp
3.84457e-172	0.377081	0.926	0.705	7.68914e-169	7	Col6a1
4.97247e-172	0.829246	0.63	0.325	9.94493e-169	7	Penk
2.48052e-170	0.369594	0.733	0.565	4.96105e-167	7	Eng
6.35586e-165	0.555158	0.918	0.778	1.27117e-161	7	Dusp1
2.77141e-164	0.31054	0.991	0.863	5.54282e-161	7	Apoe
1.4333e-161	0.916758	0.714	0.557	2.86659e-158	7	Zdbf2
8.25236e-159	0.554553	0.727	0.561	1.65047e-155	7	Lbh
4.48914e-158	-0.282341	0.459	0.608	8.97828e-155	7	Fam81a
2.64106e-157	0.497002	0.808	0.682	5.28213e-154	7	Ccdc80
3.27347e-154	-0.354704	0.529	0.698	6.54694e-151	7	Evc2
3.04455e-151	0.474399	0.894	0.729	6.08909e-148	7	Irf1
3.21707e-147	0.282686	0.99	0.904	6.43414e-144	7	Cald1
9.48752e-146	-0.333152	0.367	0.545	1.8975e-142	7	Hells
1.04153e-143	0.44246	0.926	0.762	2.08305e-140	7	Tuba1a
5.91079e-138	0.658653	0.669	0.443	1.18216e-134	7	Gas1
1.65365e-136	0.768703	0.674	0.492	3.30731e-133	7	Slc26a7
1.53738e-134	0.602727	0.74	0.605	3.07476e-131	7	Actr3b
4.14093e-133	0.361065	0.771	0.56	8.28186e-130	7	Hspa1a
2.97484e-130	0.646102	0.69	0.559	5.94968e-127	7	Fbln5
7.10238e-128	0.30911	0.597	0.313	1.42048e-124	7	Ltbp2
8.95716e-128	-0.289213	0.738	0.447	1.79143e-124	7	Ebf1
1.16496e-126	0.528974	0.731	0.537	2.32992e-123	7	Bhlhe40
4.26879e-126	0.253938	0.987	0.961	8.53758e-123	7	Cst3
1.43964e-125	0.724337	0.639	0.5	2.87928e-122	7	Col12a1
1.83997e-125	-0.269358	0.301	0.478	3.67993e-122	7	Gsta4
2.89994e-125	-0.336154	0.731	0.744	5.79988e-122	7	Arhgdig
2.30629e-124	0.417495	0.918	0.817	4.61257e-121	7	Atf3
3.66212e-124	-0.26484	0.449	0.575	7.32425e-121	7	Irx3
3.0448e-121	0.328815	0.778	0.586	6.08959e-118	7	Lama2
1.74839e-117	0.545437	0.706	0.529	3.49678e-114	7	Olfml3
2.86955e-117	0.324365	0.792	0.604	5.7391e-114	7	Rasl11b
3.15977e-112	0.502881	0.728	0.625	6.31954e-109	7	Hmga2
4.88519e-112	0.372265	0.745	0.584	9.77037e-109	7	Arx
1.33394e-109	-0.312629	0.439	0.541	2.66789e-106	7	Cited4
5.4078e-109	0.252841	0.743	0.543	1.08156e-105	7	Col5a1
9.14363e-109	0.392154	0.804	0.612	1.82873e-105	7	Ugdh
5.82158e-108	-0.27711	0.467	0.649	1.16432e-104	7	Phgdh
2.48152e-107	0.403402	0.685	0.476	4.96305e-104	7	Pde10a
3.31875e-107	0.403886	0.88	0.812	6.6375e-104	7	Col11a1
4.79836e-107	0.679661	0.831	0.746	9.59671e-104	7	Tacc1
1.90262e-105	0.519285	0.668	0.53	3.80524e-102	7	Prrx1
9.24243e-104	0.281265	0.739	0.563	1.84849e-100	7	Cxcl14
7.25052e-103	0.355035	0.74	0.598	1.4501e-99	7	Col5a2
5.00241e-102	0.452484	0.932	0.779	1.00048e-98	7	Gadd45g
4.39428e-99	-0.278723	0.392	0.521	8.78856e-96	7	Ptp4a3
8.76036e-99	0.412757	0.683	0.531	1.75207e-95	7	Hic1
1.15443e-97	-0.310332	0.379	0.505	2.30886e-94	7	Cdc20
1.65222e-97	0.321806	0.657	0.488	3.30443e-94	7	Sox11
1.07594e-95	-0.33085	0.363	0.529	2.15188e-92	7	Gtf2a1
1.58857e-94	0.458832	0.8	0.7	3.17714e-91	7	Id2
7.1937e-93	0.407492	0.689	0.539	1.43874e-89	7	Lhfp
1.42626e-89	0.29784	0.757	0.645	2.85253e-86	7	Grb10
1.11483e-88	0.405478	0.661	0.493	2.22966e-85	7	Ier5l
1.52245e-88	0.430759	0.867	0.818	3.0449e-85	7	Thbs1
2.11127e-88	0.346806	0.593	0.359	4.22253e-85	7	G0s2
2.79235e-88	0.431446	0.704	0.54	5.5847e-85	7	Myadm
1.68358e-87	0.339584	0.71	0.557	3.36717e-84	7	Rhoj
2.20484e-87	0.559214	0.751	0.695	4.40968e-84	7	Lpl
3.29574e-86	0.409795	0.772	0.64	6.59148e-83	7	Zfp36
8.39982e-86	0.325829	0.803	0.644	1.67996e-82	7	Sat1
8.31755e-84	0.413209	0.702	0.595	1.66351e-80	7	Loxl1
3.81034e-83	-0.355166	0.402	0.563	7.62068e-80	7	Bicd1
1.36116e-80	-0.336191	0.599	0.673	2.72231e-77	7	Sbno2
7.70123e-80	-0.278049	0.525	0.563	1.54025e-76	7	Kcnk1
8.85243e-79	0.560676	0.764	0.684	1.77049e-75	7	Gadd45a
2.09195e-76	0.322288	0.957	0.891	4.1839e-73	7	Ube2s
9.34321e-74	-0.330156	0.483	0.62	1.86864e-70	7	Hmgn2
3.0487e-73	-0.29235	0.562	0.675	6.0974e-70	7	Ext1
5.7112e-72	0.288167	0.664	0.49	1.14224e-68	7	Creb3l1
9.75793e-72	-0.258689	0.531	0.571	1.95159e-68	7	Mmd2
4.61514e-71	0.402582	0.915	0.8	9.23027e-68	7	Neat1
3.7764e-68	-0.353364	0.546	0.318	7.5528e-65	7	Lyz2
6.95884e-68	-0.34841	0.633	0.712	1.39177e-64	7	Serpinb6b
7.5183e-67	-0.318614	0.254	0.429	1.50366e-63	7	Gm37350
8.50472e-65	-0.322647	0.714	0.758	1.70094e-61	7	Tex14
2.43518e-64	0.376754	0.577	0.403	4.87036e-61	7	Pde3a
3.88204e-64	0.357986	0.966	0.903	7.76409e-61	7	Ldha
6.52802e-62	-0.277966	0.513	0.568	1.3056e-58	7	Ccnb1
1.06812e-61	-0.254676	0.652	0.446	2.13624e-58	7	Apold1
2.93542e-61	-0.30963	0.897	0.767	5.87083e-58	7	Col4a2
9.71899e-59	-0.346976	0.695	0.753	1.9438e-55	7	Fam46a
1.44216e-56	0.613646	0.678	0.623	2.88431e-53	7	Mafb
3.29128e-56	-0.321085	0.637	0.651	6.58256e-53	7	Heyl
6.14029e-56	-0.338929	0.457	0.511	1.22806e-52	7	Wnt6
1.70716e-55	0.254334	0.799	0.667	3.41432e-52	7	Pnp
7.27156e-55	-0.276611	0.866	0.721	1.45431e-51	7	Fhl1
5.7416e-54	-0.268597	0.645	0.707	1.14832e-50	7	Cotl1
1.60745e-51	0.277485	0.676	0.586	3.2149e-48	7	Sorbs2
7.13353e-50	0.324144	0.872	0.815	1.42671e-46	7	Klf2
1.0869e-48	0.356676	0.804	0.671	2.1738e-45	7	Gem
3.09826e-48	0.440344	0.653	0.56	6.19651e-45	7	Nr4a3
1.45267e-46	-0.326782	0.527	0.598	2.90535e-43	7	Ppa1
1.21485e-45	0.346997	0.94	0.847	2.42969e-42	7	Dnajb1
1.52266e-45	0.574512	0.561	0.412	3.04531e-42	7	Cdkn1c
1.71262e-45	-0.266335	0.676	0.727	3.42525e-42	7	Zfp277
1.36132e-44	-0.348787	0.649	0.738	2.72264e-41	7	Pik3ip1
1.45598e-43	-0.317725	0.592	0.644	2.91196e-40	7	Mcm7
1.29392e-41	-0.299235	0.654	0.782	2.58784e-38	7	Mef2c
1.67994e-41	-0.332944	0.641	0.668	3.35988e-38	7	Pank1
3.29584e-41	0.412304	0.571	0.437	6.59167e-38	7	Lmcd1
3.73094e-40	0.389495	0.641	0.584	7.46188e-37	7	Maf
3.55567e-39	-0.261021	0.602	0.641	7.11133e-36	7	Tuba1c
2.25794e-38	-0.255719	0.61	0.718	4.51588e-35	7	Tmpo
2.61502e-38	-0.354853	0.361	0.436	5.23004e-35	7	Aard
3.96542e-38	0.292437	0.518	0.329	7.93083e-35	7	Cd55
8.48654e-35	0.366399	0.656	0.605	1.69731e-31	7	Ntng1
2.72654e-34	0.605424	0.526	0.362	5.45308e-31	7	Bambi
4.29445e-31	-0.291187	0.695	0.622	8.58889e-28	7	Krt18
3.27826e-30	0.2811	0.621	0.533	6.55652e-27	7	Cd9
1.73472e-29	0.32874	0.728	0.643	3.46944e-26	7	Cwc25
6.60901e-28	0.2695	0.631	0.561	1.3218e-24	7	Spats2l
1.31286e-26	0.315024	0.608	0.518	2.62572e-23	7	1190002N15Rik
4.79899e-23	-0.285043	0.69	0.461	9.59798e-20	7	Ndufa4l2
6.47962e-23	0.385125	0.694	0.63	1.29592e-19	7	Gata6
5.74836e-22	-0.34375	0.429	0.454	1.14967e-18	7	Egfl7
9.02347e-22	-0.300367	0.442	0.441	1.80469e-18	7	Aspn
2.23342e-21	-0.265598	0.543	0.403	4.46683e-18	7	Esam
6.68234e-21	-0.337285	0.753	0.751	1.33647e-17	7	Ptges
1.73872e-16	-0.313104	0.635	0.662	3.47744e-13	7	Meg3
3.69235e-16	-0.292753	0.722	0.608	7.3847e-13	7	Pla2g1b
2.74214e-14	0.262422	0.617	0.608	5.48428e-11	7	S100a16
3.60353e-14	-0.251787	0.719	0.769	7.20706e-11	7	Nucks1
1.01474e-13	-0.259887	0.445	0.428	2.02949e-10	7	Emcn
2.0408e-13	-0.349891	0.692	0.643	4.0816e-10	7	Bex1
7.293e-13	-0.267649	0.687	0.623	1.4586e-09	7	Hmmr
1.22018e-12	0.375506	0.505	0.415	2.44036e-09	7	Plat
5.51083e-12	0.347261	0.527	0.431	1.10217e-08	7	Fzd8
3.78959e-11	-0.293886	0.724	0.532	7.57918e-08	7	Mical2
1.05169e-10	0.257171	0.645	0.64	2.10338e-07	7	Bmp2
1.14761e-10	0.293016	0.584	0.545	2.29523e-07	7	Rdh10
3.17755e-10	-0.308934	0.71	0.657	6.35511e-07	7	Nrp1
7.4088e-09	-0.309249	0.634	0.467	1.48176e-05	7	Mt2
3.09365e-08	0.280131	0.539	0.492	6.1873e-05	7	Ets1
5.00389e-08	0.70245	0.543	0.501	0.000100078	7	Hsd11b2
5.3459e-08	0.251933	0.499	0.4	0.000106918	7	Pdgfrl
3.34179e-07	-0.301177	0.829	0.706	0.000668358	7	Sel1l3
4.49092e-07	-0.315314	0.567	0.538	0.000898183	7	Pcp4l1
4.75239e-07	-0.353802	0.875	0.867	0.000950477	7	Flna
2.85476e-05	-0.297834	0.717	0.722	0.0570953	7	Pik3r1
3.36539e-05	-0.327955	0.6	0.597	0.0673077	7	Fn1
4.42324e-05	-0.320178	0.89	0.825	0.0884647	7	Socs2
[truncated: 5,608 more rows]

## Sheet: Top250_Granulosa
Preferentially expressed genes: re-clustered granulosa cell clusters gc0–gc17
p_val	avg_log2FC	pct.1	pct.2	p_val_adj	cluster	gene
0	2.1982	0.985	0.847	0	0	Gpx3
0	2.03565	0.983	0.831	0	0	Cald1
0	1.61379	0.885	0.769	0	0	Rarres2
0	1.46579	0.977	0.88	0	0	Mmp11
0	1.4346	0.993	0.843	0	0	Cfh
0	1.38534	0.922	0.745	0	0	Agt
0	1.36088	1	0.992	0	0	Clu
0	1.29407	0.989	0.933	0	0	Prss23
0	1.28767	0.949	0.78	0	0	Apoe
0	1.27534	0.819	0.641	0	0	Tagln
0	1.18824	1	0.991	0	0	Cst3
0	1.18501	0.993	0.96	0	0	Cited2
0	1.16559	0.994	0.954	0	0	Tpm1
0	1.13592	0.813	0.629	0	0	Acta2
0	1.08963	0.904	0.767	0	0	Vim
0	1.05072	0.995	0.974	0	0	Ywhaq
0	1.02506	0.979	0.944	0	0	Mlf1
0	1.00733	0.792	0.589	0	0	Ckb
0	1.00559	0.921	0.716	0	0	Tmsb4x
0	0.953223	0.999	0.99	0	0	Chchd10
0	0.913199	0.935	0.858	0	0	Pik3ip1
0	0.838349	0.962	0.897	0	0	Bcat1
0	0.833259	0.939	0.813	0	0	Acsbg1
0	0.801892	0.881	0.701	0	0	Uchl1
0	0.687241	0.999	0.991	0	0	Myl6
0	0.448505	0.788	0.638	0	0	Mmp2
0	0.310871	0.706	0.503	0	0	Ace
1.16835e-307	0.879771	1	0.993	2.3367e-304	0	Sox4
6.65638e-304	1.04616	0.87	0.643	1.33128e-300	0	Tuba1a
2.39315e-303	0.685953	0.961	0.893	4.7863e-300	0	Flna
5.60675e-303	0.531471	0.754	0.611	1.12135e-299	0	Bgn
1.13117e-301	1.08045	0.803	0.709	2.26233e-298	0	Hspb1
7.41222e-292	1.87348	0.95	0.913	1.48244e-288	0	Nupr1
2.09194e-286	1.04033	0.932	0.871	4.18387e-283	0	Gadd45b
4.2024e-285	0.448429	0.72	0.605	8.4048e-282	0	Prg4
2.55137e-282	0.800862	0.882	0.753	5.10273e-279	0	Mylk
1.01551e-265	0.565342	0.864	0.666	2.03102e-262	0	Fhl1
1.22292e-250	0.633474	0.762	0.595	2.44583e-247	0	Ccdc3
3.63062e-249	0.265206	0.715	0.607	7.26124e-246	0	Lox
1.00506e-238	0.791437	0.765	0.591	2.01012e-235	0	Sorbs2
2.08514e-236	0.356839	0.688	0.534	4.17029e-233	0	Emb
4.30531e-235	-0.397143	0.438	0.718	8.61062e-232	0	Dnph1
8.98047e-229	0.654707	0.887	0.808	1.79609e-225	0	Itm2a
3.89345e-227	0.752103	0.981	0.935	7.78689e-224	0	Grb14
5.61268e-223	-0.293913	0.392	0.664	1.12254e-219	0	Diaph3
3.46202e-211	0.479386	0.743	0.695	6.92405e-208	0	Fgd5
6.93466e-209	0.594562	0.95	0.819	1.38693e-205	0	Sparc
4.86928e-203	0.274414	0.621	0.424	9.73856e-200	0	Tnnc1
2.84229e-202	0.521727	0.77	0.63	5.68457e-199	0	Col4a1
2.57153e-198	-0.45381	0.371	0.649	5.14306e-195	0	Racgap1
1.51944e-197	-0.401546	0.401	0.666	3.03889e-194	0	Hmmr
3.1012e-197	0.430711	0.727	0.584	6.2024e-194	0	Col4a2
1.00995e-190	0.35242	0.653	0.481	2.01989e-187	0	Tubb2b
2.36236e-190	1.20469	0.886	0.814	4.72473e-187	0	Neat1
1.90308e-189	0.684812	0.687	0.487	3.80617e-186	0	Pcp4l1
1.39296e-186	-0.34311	0.278	0.616	2.78591e-183	0	Dhfr
3.8497e-186	0.369801	0.686	0.535	7.6994e-183	0	Gsn
3.1827e-184	0.66979	1	1	6.3654e-181	0	Malat1
1.28228e-182	0.532558	0.814	0.676	2.56457e-179	0	Selenop
4.1792e-182	-0.387597	0.524	0.822	8.3584e-179	0	Plpp3
2.06531e-179	0.461865	0.753	0.591	4.13062e-176	0	Ghr
1.55494e-178	0.635836	0.895	0.846	3.10987e-175	0	Lmna
4.16515e-177	0.538489	0.87	0.733	8.33031e-174	0	Crip2
1.05123e-175	0.463711	1	0.997	2.10246e-172	0	Ctsl
4.52848e-171	-0.326544	0.233	0.575	9.05697e-168	0	Cntn4
2.66702e-169	-0.34086	0.318	0.624	5.33404e-166	0	Irx3
1.96437e-162	0.884002	0.764	0.652	3.92875e-159	0	Slc6a6
2.53613e-157	0.563841	0.793	0.658	5.07227e-154	0	Cyp1b1
2.94513e-151	0.567888	0.828	0.742	5.89026e-148	0	Gadd45a
4.78946e-150	-0.437496	0.468	0.692	9.57891e-147	0	Spc24
3.6447e-147	0.732332	0.931	0.877	7.2894e-144	0	Thbs1
3.3608e-144	0.404137	0.937	0.893	6.72161e-141	0	Itih5
3.00339e-139	-0.428937	0.616	0.809	6.00678e-136	0	Tox2
2.51028e-136	-0.369285	0.417	0.651	5.02056e-133	0	Mcm4
6.40542e-135	0.645517	0.838	0.791	1.28108e-131	0	Tnfrsf12a
1.47513e-134	0.428884	0.618	0.532	2.95027e-131	0	Tmem100
1.1711e-132	-0.313374	0.242	0.532	2.34221e-129	0	Gldn
1.67035e-132	-0.309016	0.35	0.627	3.34069e-129	0	Tdrp
4.66612e-131	-0.436056	0.697	0.844	9.33223e-128	0	Evc2
4.54842e-130	0.746525	0.684	0.634	9.09683e-127	0	Cdc42ep3
2.7633e-128	-0.404687	0.735	0.849	5.52659e-125	0	Tex14
6.68469e-127	-0.355557	0.504	0.677	1.33694e-123	0	Cenpm
1.33045e-126	0.444657	0.796	0.72	2.6609e-123	0	Kcnk2
7.55465e-126	-0.27915	0.475	0.622	1.51093e-122	0	Stra6
1.79945e-125	-0.311221	0.47	0.687	3.59889e-122	0	Tmem97
1.02197e-124	-0.435843	0.333	0.606	2.04395e-121	0	Slc26a7
2.97941e-123	-0.371199	0.428	0.684	5.95881e-120	0	Dnajc9
1.17205e-122	0.667335	0.956	0.91	2.3441e-119	0	Sdc4
7.34466e-119	0.44074	0.786	0.712	1.46893e-115	0	Tagln2
2.77887e-116	0.257807	0.529	0.388	5.55775e-113	0	Tinagl1
1.53681e-115	0.491231	0.824	0.775	3.07362e-112	0	Aebp1
5.1799e-115	0.685566	0.952	0.92	1.03598e-111	0	Junb
1.98582e-114	-0.431199	0.496	0.672	3.97164e-111	0	Mcm5
6.62017e-113	0.285078	0.642	0.543	1.32403e-109	0	Pdlim5
7.82849e-113	0.369275	0.594	0.51	1.5657e-109	0	Cav1
1.43327e-111	-0.31838	0.466	0.682	2.86654e-108	0	Rfc4
1.92531e-109	-0.388885	0.734	0.863	3.85062e-106	0	Dctpp1
4.72259e-109	-0.296535	0.366	0.63	9.44518e-106	0	Topbp1
5.45698e-108	0.308599	0.565	0.429	1.0914e-104	0	Ogn
2.86153e-107	0.429246	0.661	0.637	5.72306e-104	0	Asb4
5.25653e-107	-0.277723	0.353	0.582	1.05131e-103	0	Spc25
1.03177e-106	0.454333	0.869	0.818	2.06353e-103	0	Ehd4
1.43442e-106	-0.317286	0.568	0.751	2.86884e-103	0	Limch1
1.6479e-106	-0.274565	0.427	0.617	3.29581e-103	0	Bub1b
1.65391e-106	0.403449	0.556	0.549	3.30782e-103	0	Spp1
2.06471e-105	-0.422552	0.437	0.614	4.12941e-102	0	Pcsk6
1.85654e-102	0.745676	0.947	0.935	3.71308e-99	0	Mt1
8.51688e-102	-0.402657	0.585	0.707	1.70338e-98	0	Pla2g1b
6.1516e-101	0.493467	0.83	0.713	1.23032e-97	0	Ctgf
8.8239e-101	-0.358081	0.302	0.541	1.76478e-97	0	Mns1
1.65357e-100	-0.33543	0.651	0.761	3.30713e-97	0	Dnajb13
2.3462e-100	-0.329644	0.728	0.814	4.6924e-97	0	C130074G19Rik
9.93223e-100	0.660552	0.629	0.563	1.98645e-96	0	S100a6
2.57997e-97	-0.367017	0.41	0.624	5.15994e-94	0	Tyms
2.66372e-97	-0.429973	0.364	0.597	5.32745e-94	0	Ccnb1
4.32587e-95	0.559021	0.712	0.709	8.65174e-92	0	Bmp2
5.07054e-95	-0.293356	0.412	0.579	1.01411e-91	0	Kif15
9.135e-95	-0.35662	0.69	0.841	1.827e-91	0	C1galt1
1.21148e-93	-0.377862	0.537	0.71	2.42296e-90	0	Armcx5
2.85538e-93	-0.292218	0.53	0.731	5.71076e-90	0	Slc25a13
3.14826e-93	-0.376022	0.514	0.654	6.29653e-90	0	Knl1
5.94125e-93	-0.276804	0.272	0.531	1.18825e-89	0	Nppc
1.07354e-92	-0.354805	0.505	0.683	2.14708e-89	0	Rpa2
9.95296e-91	-0.36475	0.429	0.593	1.99059e-87	0	Pbk
6.65735e-90	-0.35538	0.454	0.636	1.33147e-86	0	Gmnn
2.23434e-88	-0.415204	0.689	0.81	4.46868e-85	0	Cks1b
2.38922e-88	-0.389105	0.562	0.734	4.77844e-85	0	Dpf3
2.15477e-87	-0.275109	0.422	0.582	4.30954e-84	0	Hs6st2
9.45708e-87	-0.408196	0.498	0.708	1.89142e-83	0	Car14
9.65566e-84	-0.398573	0.717	0.833	1.93113e-80	0	Nexmif
3.30286e-83	0.465246	0.943	0.921	6.60571e-80	0	Txnip
7.87005e-83	-0.333847	0.548	0.71	1.57401e-79	0	Creld2
6.85769e-81	0.408177	0.875	0.85	1.37154e-77	0	Pim1
4.73702e-80	-0.411813	0.641	0.769	9.47405e-77	0	Ppa1
1.15604e-79	0.348603	0.747	0.678	2.31209e-76	0	Lpp
1.0746e-78	-0.252668	0.412	0.591	2.14921e-75	0	Ntng1
1.08243e-78	-0.252455	0.405	0.617	2.16486e-75	0	Esco2
7.64827e-78	-0.271693	0.485	0.645	1.52965e-74	0	Plxna2
1.07226e-76	0.380716	0.854	0.825	2.14452e-73	0	Crim1
1.44605e-75	0.430746	0.719	0.682	2.8921e-72	0	Fbxo32
2.64032e-75	0.317439	0.57	0.555	5.28065e-72	0	Kcnk3
8.22426e-75	-0.398359	0.769	0.857	1.64485e-71	0	Mdfic
2.17383e-74	-0.450942	0.705	0.816	4.34766e-71	0	Rap2b
3.88014e-74	-0.318707	0.507	0.665	7.76028e-71	0	AU020206
1.2194e-73	0.574817	0.838	0.781	2.4388e-70	0	Lgals1
1.8802e-73	0.450226	0.833	0.799	3.7604e-70	0	Arrdc3
2.4662e-73	0.293035	0.691	0.571	4.93239e-70	0	Ank2
1.55566e-72	0.514674	0.774	0.735	3.11133e-69	0	Dusp1
1.97831e-72	-0.251051	0.294	0.514	3.95662e-69	0	Mcm2
2.54718e-72	-0.250034	0.243	0.484	5.09437e-69	0	Gm37350
9.51918e-72	-0.318598	0.316	0.528	1.90384e-68	0	Kif11
3.09862e-71	-0.303947	0.365	0.542	6.19723e-68	0	Mis18bp1
3.46914e-71	-0.256339	0.335	0.536	6.93828e-68	0	Kif4
6.52015e-71	-0.284087	0.435	0.613	1.30403e-67	0	Hirip3
1.28959e-69	-0.401623	0.399	0.565	2.57919e-66	0	Gsta4
1.36769e-69	-0.331685	0.401	0.606	2.73538e-66	0	Hsd11b2
3.0259e-69	-0.301248	0.963	0.976	6.0518e-66	0	Txnl1
7.43815e-68	-0.387072	0.302	0.505	1.48763e-64	0	Gm45889
1.49617e-67	-0.273166	0.473	0.616	2.99234e-64	0	Knstrn
2.27158e-66	-0.322102	0.685	0.78	4.54316e-63	0	Ano4
2.07488e-64	-0.337185	0.551	0.695	4.14975e-61	0	Usp1
3.60466e-64	-0.382188	0.52	0.644	7.20933e-61	0	Cdca3
5.44045e-64	-0.358453	0.516	0.619	1.08809e-60	0	Uhrf1
5.62006e-64	0.438688	0.84	0.804	1.12401e-60	0	H2-K1
8.74826e-64	-0.298007	0.448	0.583	1.74965e-60	0	Tacc3
2.88446e-63	-0.408618	0.653	0.767	5.76891e-60	0	H1fx
2.94318e-63	-0.30476	0.49	0.679	5.88637e-60	0	Ckap5
6.90422e-63	0.49616	0.908	0.904	1.38084e-59	0	Ier3
1.08388e-62	-0.330578	0.599	0.796	2.16777e-59	0	Meg3
2.3683e-62	-0.451162	0.635	0.763	4.7366e-59	0	Rasgef1b
1.18389e-61	-0.282293	0.383	0.58	2.36778e-58	0	Emx2
2.26847e-60	0.315631	0.563	0.468	4.53694e-57	0	Pdk4
1.32798e-58	-0.402956	0.94	0.949	2.65596e-55	0	Isyna1
1.44212e-58	0.463073	0.615	0.622	2.88424e-55	0	Maf
2.48423e-58	-0.420301	0.761	0.866	4.96846e-55	0	Dock4
3.71571e-57	-0.278758	0.781	0.878	7.43142e-54	0	Ptpre
6.78325e-57	0.492007	0.605	0.512	1.35665e-53	0	Rasl11a
1.33354e-56	0.432904	0.686	0.615	2.66708e-53	0	Fabp3
3.10989e-56	-0.332884	0.451	0.596	6.21977e-53	0	Dtl
7.03856e-56	-0.300812	0.495	0.637	1.40771e-52	0	Dnmt1
9.85797e-56	0.308501	0.832	0.836	1.97159e-52	0	Foxp2
1.981e-55	-0.302763	0.543	0.709	3.962e-52	0	Adgrg1
2.58119e-55	0.514493	0.837	0.816	5.16237e-52	0	Cyr61
3.87841e-55	0.304663	0.678	0.62	7.75682e-52	0	Me1
5.07812e-55	0.717599	0.636	0.649	1.01562e-51	0	Igfbp4
1.16249e-54	0.316724	0.983	0.96	2.32498e-51	0	Foxo1
3.32563e-54	0.340244	0.894	0.853	6.65126e-51	0	Tes
2.22078e-53	-0.259742	0.244	0.457	4.44155e-50	0	Rrm2
1.04746e-52	-0.449363	0.512	0.665	2.09493e-49	0	H2afx
3.65389e-52	0.430798	0.555	0.541	7.30778e-49	0	Rrad
1.04582e-51	-0.255037	0.322	0.518	2.09164e-48	0	Rasd1
1.11648e-51	-0.415369	0.751	0.803	2.23297e-48	0	Mcm6
1.24607e-51	-0.401692	0.355	0.525	2.49214e-48	0	Wnt6
1.22273e-50	-0.33032	0.403	0.546	2.44546e-47	0	Kif23
4.86893e-50	-0.372868	0.957	0.977	9.73787e-47	0	Htra1
1.38804e-49	0.326677	0.706	0.633	2.77609e-46	0	Fbn2
1.40459e-48	0.260725	0.898	0.872	2.80918e-45	0	Col9a2
3.22241e-48	-0.421789	0.658	0.785	6.44482e-45	0	Mphosph8
5.33438e-47	-0.250445	0.505	0.606	1.06688e-43	0	Ckap2l
5.1343e-46	-0.265889	0.755	0.824	1.02686e-42	0	Rnf19b
2.44891e-45	0.284757	0.723	0.707	4.89782e-42	0	Csrp1
1.38929e-44	0.397859	0.965	0.955	2.77858e-41	0	Csrp2
4.73955e-44	-0.301229	0.777	0.877	9.4791e-41	0	Prkar2b
1.88692e-43	-0.269777	0.877	0.92	3.77384e-40	0	Cndp2
2.21687e-43	-0.409109	0.518	0.641	4.43374e-40	0	Gtf2a1
1.78668e-42	-0.379022	0.279	0.468	3.57337e-39	0	Cdk1
1.90034e-42	-0.338022	0.664	0.737	3.80068e-39	0	Ezh2
2.01477e-41	-0.273436	0.613	0.741	4.02954e-38	0	Rad21
5.28716e-41	0.669237	0.783	0.784	1.05743e-37	0	Atf3
2.38412e-40	0.395457	0.79	0.791	4.76824e-37	0	Serpinb6b
1.90037e-39	-0.400113	0.296	0.473	3.80075e-36	0	Igfbp5
3.95339e-39	0.465333	0.545	0.474	7.90678e-36	0	Hspa1a
1.21558e-38	0.385144	0.555	0.571	2.43116e-35	0	Bicc1
1.06946e-37	-0.272225	0.391	0.537	2.13893e-34	0	Kif22
3.48227e-37	-0.281398	0.919	0.95	6.96455e-34	0	Arhgap29
3.61384e-36	-0.448904	0.606	0.676	7.22768e-33	0	Atad2
2.36394e-33	0.559726	0.712	0.707	4.72788e-30	0	Cxcl1
3.38241e-32	-0.327992	0.906	0.946	6.76482e-29	0	Hjurp
9.38264e-31	0.675229	0.633	0.692	1.87653e-27	0	Id2
1.12517e-30	-0.252993	0.928	0.931	2.25035e-27	0	Fscn1
1.55641e-30	0.269885	0.49	0.486	3.11282e-27	0	Gpc6
4.97342e-28	0.279453	0.786	0.725	9.94683e-25	0	Ddit4l
5.38613e-27	0.291676	0.689	0.684	1.07723e-23	0	Sbno2
1.0968e-26	0.406071	0.753	0.745	2.19361e-23	0	Klf4
6.14195e-26	-0.278218	0.411	0.488	1.22839e-22	0	Susd4
9.96189e-26	0.253287	0.678	0.661	1.99238e-22	0	Ifitm3
7.29475e-25	-0.26091	0.555	0.631	1.45895e-21	0	Dbf4
1.00394e-24	-0.258838	0.513	0.572	2.00789e-21	0	Mt3
5.12251e-23	0.264818	0.698	0.681	1.0245e-19	0	Errfi1
3.05952e-21	-0.300351	0.392	0.507	6.11903e-18	0	Kif20b
3.75458e-20	0.303448	0.937	0.936	7.50916e-17	0	Pik3r1
1.19671e-19	0.461844	0.456	0.449	2.39341e-16	0	Angpt2
2.69569e-19	0.254507	0.654	0.663	5.39139e-16	0	H2-D1
8.61732e-19	-0.312635	0.401	0.483	1.72346e-15	0	Cbfa2t3
2.96771e-18	-0.260015	0.557	0.653	5.93542e-15	0	AC167229.1
1.878e-16	-0.278437	0.465	0.551	3.75601e-13	0	Aspm
7.85597e-16	0.254706	0.924	0.945	1.57119e-12	0	Klf6
2.27975e-15	0.300422	0.98	0.98	4.5595e-12	0	Fos
2.39686e-15	0.299385	0.806	0.844	4.79373e-12	0	Fam46a
1.04726e-14	-0.316142	0.438	0.525	2.09453e-11	0	Hist1h2ae
1.05493e-14	0.29421	0.545	0.535	2.10986e-11	0	Zfp36
2.7783e-13	0.262286	0.486	0.485	5.55661e-10	0	Crabp2
1.07455e-12	0.320561	0.615	0.622	2.14911e-09	0	Gem
3.1771e-12	0.419539	0.503	0.478	6.35421e-09	0	Socs3
1.54499e-11	-0.363097	0.822	0.865	3.08997e-08	0	Arl6ip1
1.17118e-10	0.494301	0.652	0.692	2.34236e-07	0	Id1
1.61333e-10	0.269709	0.601	0.654	3.22666e-07	0	Gm12840
7.99798e-10	0.352686	0.544	0.562	1.5996e-06	0	Hspa1b
0.000238318	0.265853	0.439	0.456	0.476636	0	Cebpd
0.00618434	0.283068	0.9	0.926	1	0	Fosb
1.58606e-274	0.790961	0.982	0.89	3.17212e-271	1	Slc18a2
2.20398e-238	-1.01175	0.958	0.977	4.40796e-235	1	Stmn1
1.69909e-216	-1.08135	0.918	0.961	3.39819e-213	1	Csrp2
1.34416e-211	-1.62188	0.908	0.944	2.68832e-208	1	Grb14
4.44113e-206	-1.0112	0.654	0.81	8.88227e-203	1	Fabp5
1.34694e-202	-0.690222	0.709	0.841	2.69388e-199	1	Mef2c
3.44466e-197	0.652573	0.966	0.813	6.88932e-194	1	Kctd14
4.28476e-182	-0.7683	0.993	0.992	8.56952e-179	1	Tubb5
1.9759e-169	0.49834	0.925	0.804	3.9518e-166	1	Tmem184a
2.31968e-169	0.627831	0.977	0.898	4.63935e-166	1	Amh
1.97073e-168	-0.325792	0.358	0.568	3.94145e-165	1	Ccna2
2.14108e-165	0.401363	0.943	0.713	4.28217e-162	1	Gas6
2.62009e-156	0.640687	0.861	0.664	5.24018e-153	1	Wnt4
6.69267e-150	0.353913	0.83	0.569	1.33853e-146	1	Col18a1
1.37435e-146	-0.351369	0.458	0.625	2.7487e-143	1	Uhrf1
5.31693e-146	0.548535	0.875	0.718	1.06339e-142	1	Synpo
8.13612e-140	0.448697	0.883	0.694	1.62722e-136	1	Dpf3
2.22865e-136	0.655146	0.79	0.608	4.45731e-133	1	Gtf2a1
1.87369e-126	0.519336	0.973	0.905	3.74739e-123	1	Kazald1
2.46192e-125	-0.339094	0.551	0.67	4.92384e-122	1	Cenpm
2.03237e-117	0.443227	0.927	0.844	4.06474e-114	1	Myo1b
1.96882e-116	0.395715	0.867	0.669	3.93764e-113	1	Adgrg1
2.64496e-116	-0.749315	0.537	0.695	5.28991e-113	1	Smc4
3.46263e-115	-0.559582	0.914	0.936	6.92526e-112	1	Tpi1
9.39636e-114	0.358131	0.901	0.752	1.87927e-110	1	Etnk2
2.18588e-112	-0.50435	0.939	0.954	4.37176e-109	1	Psma2
7.22057e-112	-0.506156	0.541	0.684	1.44411e-108	1	Atad2
1.17978e-110	-0.513276	0.694	0.822	2.35956e-107	1	H2-K1
6.74371e-110	-0.507971	0.78	0.823	1.34874e-106	1	Serpinb1a
9.87884e-108	-0.508577	0.996	0.993	1.97577e-104	1	Gapdh
2.54164e-107	-0.459973	0.685	0.817	5.08329e-104	1	Zfp277
4.78854e-107	-0.270695	0.463	0.592	9.57708e-104	1	Cenpp
9.90194e-106	-0.849347	0.993	0.99	1.98039e-102	1	H2afz
1.6041e-104	-0.53118	0.719	0.799	3.20821e-101	1	Serpinb6b
3.82873e-104	0.331157	0.813	0.605	7.65745e-101	1	Plxna2
8.98762e-103	-0.268491	0.645	0.73	1.79752e-99	1	Tagln2
1.79257e-102	-0.696474	0.628	0.678	3.58514e-99	1	Birc5
8.41892e-102	0.346702	0.889	0.774	1.68378e-98	1	Serpinf1
3.3937e-101	-0.826126	0.544	0.684	6.7874e-98	1	Tuba1a
1.27578e-100	-0.623726	0.938	0.947	2.55155e-97	1	Ube2s
7.89121e-100	-0.281038	0.445	0.574	1.57824e-96	1	Kif15
9.91142e-99	0.434087	0.972	0.943	1.98228e-95	1	Arhgap29
1.4813e-97	0.371505	0.938	0.788	2.9626e-94	1	Ptges
3.53648e-97	0.371015	0.933	0.86	7.07297e-94	1	Myo10
4.97062e-97	0.51839	0.981	0.902	9.94123e-94	1	Fam13a
3.41658e-96	0.398365	0.923	0.835	6.83317e-93	1	Mex3c
5.37894e-95	-0.251078	0.39	0.528	1.07579e-91	1	Kif4
1.87492e-94	-0.315798	0.399	0.516	3.74984e-91	1	Kif11
3.1139e-92	-0.925578	0.728	0.788	6.22779e-89	1	Hmgb2
3.12614e-90	0.290329	0.987	0.941	6.25229e-87	1	Amhr2
5.92203e-90	-0.479936	0.514	0.642	1.18441e-86	1	Incenp
8.90841e-88	-0.539826	0.816	0.871	1.78168e-84	1	Eno1
1.45714e-87	0.519599	0.85	0.759	2.91429e-84	1	Mycl
1.41803e-86	-0.801531	0.717	0.791	2.83606e-83	1	Vim
3.39648e-84	0.386442	0.779	0.683	6.79295e-81	1	Pla2g1b
1.72379e-83	0.414132	0.85	0.694	3.44759e-80	1	Cst12
4.12176e-83	0.356608	0.842	0.729	8.24353e-80	1	Fndc5
2.74328e-82	-0.710066	0.505	0.617	5.48657e-79	1	Prc1
8.15668e-82	-0.473697	0.401	0.515	1.63134e-78	1	Cdc20
1.26476e-81	-0.460404	0.76	0.825	2.52953e-78	1	Nt5dc2
3.87658e-80	-0.450968	0.778	0.845	7.75317e-77	1	Selenoh
1.01165e-79	-0.549922	0.932	0.95	2.02331e-76	1	Mlf1
3.04772e-79	-0.450214	0.443	0.538	6.09544e-76	1	Nusap1
4.26909e-78	-0.864237	0.713	0.715	8.53817e-75	1	Mki67
6.5653e-76	-0.461647	0.641	0.67	1.31306e-72	1	Spc24
6.9775e-75	0.50583	0.756	0.628	1.3955e-71	1	Dsp
2.31473e-74	-0.429164	0.684	0.726	4.62946e-71	1	Uchl1
6.79463e-74	-0.292052	0.373	0.508	1.35893e-70	1	Kif20b
3.13555e-72	0.263763	0.707	0.521	6.27111e-69	1	Perp
6.52176e-72	-0.577187	0.97	0.961	1.30435e-68	1	Foxo1
1.97723e-71	-0.496547	0.877	0.905	3.95445e-68	1	Fbln1
2.05085e-71	0.35327	0.953	0.862	4.10169e-68	1	Scd2
4.15265e-70	-0.452025	0.706	0.797	8.30529e-67	1	Lgals1
1.07849e-69	-0.356509	0.58	0.66	2.15699e-66	1	Mcm5
1.51112e-69	0.39328	0.796	0.634	3.02223e-66	1	Ihh
5.3761e-68	-0.763667	0.592	0.641	1.07522e-64	1	Pclaf
6.62059e-67	-1.28844	0.62	0.685	1.32412e-63	1	Top2a
6.62733e-67	-1.22052	0.698	0.745	1.32547e-63	1	Tmsb4x
1.24753e-66	-0.341214	0.763	0.831	2.49505e-63	1	Ehd4
1.49482e-66	-0.326625	0.589	0.672	2.98963e-63	1	Rpa2
2.33007e-65	-0.264106	0.586	0.594	4.66013e-62	1	Esco2
3.21419e-65	-0.375775	0.61	0.641	6.42838e-62	1	Knl1
4.23678e-65	-0.393784	0.999	0.997	8.47356e-62	1	Ctsl
5.90703e-65	0.32501	0.661	0.452	1.18141e-61	1	Cbfa2t3
1.64347e-64	-0.393683	0.993	0.985	3.28695e-61	1	Hmgb1
2.95531e-64	0.291976	0.903	0.774	5.91062e-61	1	Plpp3
4.78975e-64	0.304344	0.965	0.941	9.5795e-61	1	Soat1
4.7793e-63	-0.393353	0.666	0.752	9.55861e-60	1	Mcm7
4.85505e-63	-0.527763	0.941	0.942	9.71009e-60	1	Hjurp
6.02407e-63	-0.521896	0.523	0.615	1.20481e-59	1	Cks2
1.99604e-61	-0.442957	0.981	0.976	3.99209e-58	1	Ywhaq
4.30046e-61	-0.424279	0.821	0.86	8.60092e-58	1	Pgk1
5.27527e-61	-0.284961	0.668	0.791	1.05505e-57	1	Ubash3b
5.80472e-61	-0.394858	0.485	0.58	1.16094e-57	1	Hells
5.80506e-61	0.333672	0.677	0.514	1.16101e-57	1	Shtn1
6.22124e-60	0.391696	0.948	0.899	1.24425e-56	1	Ier3
1.66613e-59	-0.456217	0.832	0.86	3.33225e-56	1	Tes
6.47983e-58	-0.670672	0.558	0.61	1.29597e-54	1	Cdca8
1.60108e-57	-0.392894	0.611	0.701	3.20217e-54	1	Selenop
1.90003e-57	-0.552322	0.827	0.842	3.80006e-54	1	Fam46a
2.49268e-57	-0.510328	0.922	0.899	4.98535e-54	1	Ank3
2.78881e-57	-0.282686	0.789	0.734	5.57762e-54	1	Edn1
4.42821e-57	-0.386097	0.651	0.718	8.85642e-54	1	Ccdc34
1.59171e-56	-0.367857	0.652	0.69	3.18342e-53	1	Rrm1
1.89834e-56	-0.510021	0.552	0.598	3.79667e-53	1	Cenpe
1.01787e-55	-0.266248	0.341	0.444	2.03574e-52	1	Rrm2
1.38865e-55	-0.448636	0.986	0.98	2.7773e-52	1	Fos
1.81206e-55	-0.422806	0.739	0.784	3.62412e-52	1	Ddah1
4.2896e-55	-0.828504	0.835	0.863	8.5792e-52	1	Cfh
6.8095e-55	-1.19037	0.8	0.778	1.3619e-51	1	Nap1l5
1.06109e-54	-0.862653	0.766	0.784	2.12219e-51	1	Rarres2
2.30186e-54	-0.9674	0.801	0.754	4.60372e-51	1	Slc38a5
2.0544e-53	-0.55279	0.987	0.973	4.10881e-50	1	Htra1
3.72774e-53	-0.380916	0.618	0.667	7.45547e-50	1	H2-D1
1.99098e-52	0.291507	0.979	0.925	3.98196e-49	1	Ccnd2
2.54446e-52	-0.296102	0.515	0.587	5.08891e-49	1	Dtl
3.89615e-52	-0.397484	0.975	0.959	7.79231e-49	1	Bex4
2.26092e-51	0.359968	0.876	0.766	4.52183e-48	1	Cnmd
1.67407e-50	-0.381967	0.687	0.762	3.34814e-47	1	H1fx
5.52258e-50	-0.432934	0.962	0.955	1.10452e-46	1	Ldha
1.27877e-49	-0.618094	0.975	0.969	2.55754e-46	1	Tuba1b
1.60262e-49	-0.276138	0.572	0.603	3.20524e-46	1	Knstrn
1.37981e-48	-0.528991	0.993	0.992	2.75962e-45	1	Cst3
8.71429e-48	-0.526583	0.887	0.877	1.74286e-44	1	Gadd45b
6.71736e-47	-0.357766	0.714	0.746	1.34347e-43	1	Hmgn2
6.88546e-47	-0.307797	0.54	0.607	1.37709e-43	1	Tyms
1.1327e-46	-0.588183	0.935	0.918	2.26539e-43	1	Tubb4b
1.1355e-46	-0.880592	0.921	0.917	2.271e-43	1	Nupr1
2.04357e-46	-0.288203	0.533	0.572	4.08714e-43	1	Tacc3
7.4237e-46	-0.404122	0.738	0.804	1.48474e-42	1	Hpgd
8.06968e-46	-0.269153	0.465	0.527	1.61394e-42	1	Kif22
9.35142e-46	0.256901	0.929	0.857	1.87028e-42	1	Myo1e
2.90103e-45	-1.02755	0.574	0.603	5.80206e-42	1	Inhba
7.90319e-45	-0.417401	0.74	0.776	1.58064e-41	1	Dut
1.01902e-44	-0.477873	0.57	0.606	2.03805e-41	1	Smc2
1.03243e-44	0.313606	0.95	0.911	2.06487e-41	1	Kcnq1ot1
7.88852e-44	-0.388676	0.623	0.631	1.5777e-40	1	Cdca3
1.52109e-43	-0.432546	0.567	0.571	3.04219e-40	1	Ccnb1
3.21695e-43	-0.270561	0.589	0.662	6.43389e-40	1	Dnajc9
4.97794e-43	0.310063	0.702	0.595	9.95588e-40	1	Adgrf5
3.50935e-41	-0.357588	0.968	0.958	7.0187e-38	1	Ran
3.79824e-41	-0.481684	0.722	0.748	7.59649e-38	1	Klf4
7.19036e-41	0.413888	0.683	0.571	1.43807e-37	1	Hsd11b2
2.44693e-40	-0.256717	0.634	0.666	4.89386e-37	1	Ifitm3
1.09046e-38	-0.36252	0.786	0.799	2.18091e-35	1	Mcm6
1.18776e-38	-0.312847	0.831	0.853	2.37552e-35	1	Odc1
1.43296e-38	-0.287723	0.748	0.734	2.86593e-35	1	2024-09-11
2.70055e-38	-0.5668	0.657	0.692	5.40111e-35	1	Fhl1
1.50255e-37	-0.360856	0.617	0.615	3.0051e-34	1	Gmnn
2.88224e-37	-0.513112	0.865	0.895	5.76449e-34	1	Tdrd5
1.80114e-36	-0.462695	0.88	0.85	3.60228e-33	1	Dock4
7.65611e-36	-0.348433	0.742	0.732	1.53122e-32	1	Mpped2
4.24888e-35	0.304515	0.839	0.779	8.49776e-32	1	Wfdc10
6.90513e-35	-0.358682	0.697	0.729	1.38103e-31	1	Lmnb1
1.10138e-34	0.277784	0.79	0.653	2.20276e-31	1	Nrn1
1.95052e-34	-0.576328	0.792	0.762	3.90105e-31	1	Agt
5.89182e-34	-0.254691	0.996	0.991	1.17836e-30	1	Myl6
6.8936e-34	0.303045	0.832	0.8	1.37872e-30	1	Rap2b
1.37828e-32	-0.328783	0.897	0.905	2.75655e-29	1	Bcat1
2.77974e-31	-0.319452	0.763	0.747	5.55949e-28	1	Dnajb13
3.65674e-31	-0.25049	0.479	0.532	7.31349e-28	1	Mgarp
4.41636e-31	-0.2576	0.587	0.596	8.83271e-28	1	Bub1b
5.45879e-31	-0.299826	0.711	0.731	1.09176e-27	1	Ezh2
7.71746e-31	-0.807681	0.901	0.898	1.54349e-27	1	Itih5
6.14586e-30	-0.285632	0.994	0.983	1.22917e-26	1	Cyb5a
9.63439e-30	-0.315153	0.78	0.782	1.92688e-26	1	Ext1
1.2524e-29	-0.512325	0.574	0.65	2.5048e-26	1	Fbn2
2.18456e-28	-0.347144	0.71	0.721	4.36911e-25	1	Rgcc
2.63228e-28	-0.282466	0.808	0.818	5.26456e-25	1	Itm2a
3.54213e-28	-0.256291	0.487	0.535	7.08427e-25	1	Kif23
4.18441e-28	-0.251804	0.786	0.824	8.36882e-25	1	Nexmif
6.18004e-28	-0.39467	0.895	0.901	1.23601e-24	1	Apoa4
4.71119e-27	-0.301801	0.932	0.922	9.42238e-24	1	Txnip
1.15594e-26	-0.286355	0.93	0.926	2.31188e-23	1	Jpt1
6.09952e-26	-0.450843	0.719	0.709	1.2199e-22	1	Bmp2
8.3452e-26	-0.2852	0.648	0.702	1.66904e-22	1	Akr1c14
1.48305e-25	-0.362284	0.879	0.848	2.9661e-22	1	Lmna
1.52001e-24	-0.522713	0.64	0.615	3.04002e-21	1	Cenpa
1.83254e-24	-0.866712	0.719	0.693	3.66508e-21	1	Cenpf
2.39536e-24	-0.269369	0.889	0.898	4.79071e-21	1	Nfkbia
2.98033e-24	-0.252913	0.93	0.913	5.96065e-21	1	Cndp2
1.68978e-23	-0.296906	0.918	0.904	3.37956e-20	1	Dek
3.37511e-22	-0.341727	0.921	0.924	6.75022e-19	1	Junb
1.569e-21	-0.290649	0.795	0.794	3.13801e-18	1	Nasp
1.38645e-20	-0.425093	0.8	0.775	2.77291e-17	1	Klf2
1.6625e-20	-0.570908	0.623	0.653	3.325e-17	1	Acta2
1.75212e-20	-0.263216	0.679	0.655	3.50424e-17	1	Rfc4
3.79256e-20	-0.525535	0.757	0.687	7.58512e-17	1	Ccnb2
6.10603e-20	-0.264234	0.699	0.685	1.22121e-16	1	Fbxo32
1.07921e-19	-0.970688	0.752	0.68	2.15842e-16	1	Ube2c
1.53916e-19	-0.470075	0.735	0.689	3.07833e-16	1	Mcm3
1.54635e-19	-0.453291	0.811	0.781	3.09271e-16	1	Lig1
8.13269e-19	-0.643341	0.61	0.636	1.62654e-15	1	Inhbb
1.26775e-18	-0.425643	0.643	0.614	2.5355e-15	1	Racgap1
1.84074e-18	-0.475075	0.617	0.609	3.68147e-15	1	Ghr
5.29106e-18	-0.26119	0.687	0.672	1.05821e-14	1	Cyp1b1
6.20792e-18	-0.535682	0.802	0.78	1.24158e-14	1	Mgp
8.39789e-18	-0.273453	0.634	0.648	1.67958e-14	1	Col4a1
9.2827e-18	-1.44293	0.883	0.844	1.85654e-14	1	Cald1
2.41751e-17	-0.279119	0.89	0.879	4.83502e-14	1	Nucks1
2.58048e-17	-0.264324	0.519	0.522	5.16096e-14	1	Mis18bp1
3.37642e-17	-0.294382	0.974	0.96	6.75285e-14	1	Cables1
3.79538e-17	-0.507195	0.969	0.958	7.59077e-14	1	Tpm1
4.10193e-17	-0.287376	0.574	0.537	8.20386e-14	1	Aspm
1.05804e-15	-0.603242	0.692	0.631	2.11608e-12	1	Tpx2
1.26233e-14	-0.349934	0.691	0.661	2.52465e-11	1	Slc6a6
5.1491e-14	-0.422822	0.875	0.858	1.02982e-10	1	Arl6ip1
1.3906e-13	-0.397316	0.446	0.446	2.7812e-10	1	Cdk1
3.66718e-13	0.274512	0.704	0.66	7.33437e-10	1	Nnat
8.59689e-13	-0.504869	0.884	0.864	1.71938e-09	1	Pik3ip1
1.31633e-12	-0.372035	0.894	0.891	2.63267e-09	1	Mmp11
4.48869e-11	-0.599884	0.828	0.788	8.97737e-08	1	Col11a1
2.01724e-10	-0.774502	0.887	0.86	4.03448e-07	1	Gpx3
2.10388e-10	-0.252408	0.835	0.828	4.20776e-07	1	Crim1
4.17574e-10	-0.308502	0.713	0.557	8.35147e-07	1	Hist1h1b
2.03414e-09	-0.570535	0.833	0.795	4.06828e-06	1	Apoe
6.07647e-09	-0.312045	0.7	0.633	1.21529e-05	1	Cdc42ep3
1.64447e-08	-0.526816	0.855	0.831	3.28894e-05	1	Sparc
3.23555e-08	-0.259525	0.915	0.881	6.4711e-05	1	Fst
3.27316e-08	-0.332576	0.669	0.645	6.54631e-05	1	H2afx
7.28932e-08	-0.340655	0.764	0.676	0.000145786	1	Id2
1.35479e-07	-0.265013	0.614	0.549	0.000270959	1	Spc25
2.22161e-07	-0.287084	0.62	0.61	0.000444322	1	Sorbs2
4.33199e-07	-0.320493	0.824	0.758	0.000866397	1	Rasl10a
1.5394e-06	-0.351402	0.744	0.724	0.00307881	1	Ctgf
9.52258e-06	-0.278134	0.946	0.92	0.0190452	1	Fosb
2.86013e-05	-0.334089	0.685	0.603	0.0572027	1	Ckb
0.0010447	-0.320074	0.888	0.862	1	1	Gm26917
0.00321548	-0.271248	0.898	0.882	1	1	Thbs1
0	1.25964	0.986	0.89	0	2	Itih5
1.52539e-290	0.909629	0.996	0.934	3.05079e-287	2	Grb14
9.1172e-268	0.612208	0.949	0.858	1.82344e-264	2	Pik3ip1
9.69941e-263	0.73202	0.901	0.782	1.93988e-259	2	Col11a1
8.12713e-257	0.82242	0.95	0.868	1.62543e-253	2	Col9a2
3.73674e-250	0.709356	0.996	0.959	7.47347e-247	2	Foxo1
5.04451e-243	0.715339	0.923	0.828	1.0089e-239	2	Tex14
6.16215e-242	0.790278	0.979	0.883	1.23243e-238	2	Tdrd5
4.75205e-233	-0.275471	0.257	0.64	9.50409e-230	2	Stra6
2.20318e-232	0.687243	0.974	0.895	4.40635e-229	2	Ank3
1.94389e-229	0.576831	0.998	0.985	3.88779e-226	2	Ivns1abp
9.16445e-212	0.612845	0.936	0.818	1.83289e-208	2	Crim1
3.68038e-211	0.656895	0.817	0.705	7.36075e-208	2	Vpreb3
1.02699e-203	0.655483	0.992	0.958	2.05399e-200	2	Cables1
7.42667e-195	0.602025	0.894	0.768	1.48533e-191	2	Ddah1
6.57649e-194	0.580757	0.916	0.758	1.3153e-190	2	Zfp385b
3.86139e-191	0.643195	0.992	0.953	7.72279e-188	2	Csrp2
4.83072e-191	-0.651612	0.982	0.986	9.66143e-188	2	Hmgb1
7.42115e-191	-0.655858	0.319	0.666	1.48423e-187	2	Defb19
1.07961e-189	0.490019	0.999	0.997	2.15922e-186	2	Ctsl
2.61614e-180	0.497182	0.969	0.849	5.23228e-177	2	Cfh
1.144e-179	0.350944	0.873	0.67	2.288e-176	2	Fhl1
5.87002e-168	0.546988	0.979	0.935	1.174e-164	2	Prss23
1.73655e-163	-0.681883	0.621	0.836	3.4731e-160	2	Tmem184a
9.04604e-161	0.574826	0.981	0.957	1.80921e-157	2	Tpm1
2.16732e-160	-0.630277	0.452	0.718	4.33465e-157	2	Mcm3
5.4415e-155	0.688288	0.862	0.713	1.0883e-151	2	Ctgf
1.64065e-154	-0.624018	0.423	0.717	3.28131e-151	2	Adgrg1
3.43552e-154	-0.450811	0.503	0.721	6.87104e-151	2	Fxyd6
1.49003e-153	0.471853	0.856	0.718	2.98006e-150	2	Limch1
1.13239e-151	-0.651223	0.722	0.866	2.26479e-148	2	Myo1b
2.20258e-150	-0.704254	0.606	0.802	4.40515e-147	2	Lig1
9.85555e-150	-0.718852	0.314	0.644	1.97111e-146	2	Kitl
2.44981e-149	0.517415	0.994	0.957	4.89961e-146	2	Bex4
4.61366e-146	-0.695211	0.454	0.694	9.22732e-143	2	Birc5
6.32038e-145	0.295789	0.759	0.595	1.26408e-141	2	Ghr
1.06331e-140	0.507697	0.861	0.68	2.12662e-137	2	Akr1c14
6.93798e-139	-0.68896	0.353	0.629	1.3876e-135	2	Cdca8
3.20095e-138	-0.725254	0.278	0.595	6.4019e-135	2	Vcan
7.71911e-138	-0.401624	0.348	0.67	1.54382e-134	2	Pdlim4
1.64768e-137	-0.719831	0.989	0.992	3.29537e-134	2	Tubb5
1.64405e-136	-0.463464	0.397	0.672	3.28811e-133	2	AU020206
2.98042e-134	0.538583	0.917	0.785	5.96085e-131	2	Hpgd
3.38234e-134	-0.36906	0.415	0.66	6.76468e-131	2	Knl1
1.58477e-131	-0.467063	0.361	0.617	3.16955e-128	2	Pcsk6
5.63042e-130	0.413091	0.887	0.795	1.12608e-126	2	C130074G19Rik
4.74896e-129	0.567531	0.947	0.896	9.49792e-126	2	Apoa4
6.07031e-129	-0.388234	0.379	0.649	1.21406e-125	2	Mcm4
9.44895e-129	-0.291272	0.301	0.559	1.88979e-125	2	Cntn4
1.97267e-127	-0.563885	0.501	0.758	3.94534e-124	2	Synpo
4.30898e-127	0.251422	0.649	0.542	8.61795e-124	2	Clec1a
2.93657e-125	0.331054	0.768	0.678	5.87315e-122	2	Fbxo32
2.57747e-122	0.352321	0.786	0.716	5.15494e-119	2	Nexn
4.12238e-122	0.456213	0.987	0.944	8.24476e-119	2	Nr5a2
3.95748e-120	-0.407026	0.391	0.681	7.91497e-117	2	Dnajc9
1.9258e-117	0.304546	0.769	0.704	3.8516e-114	2	Bmp2
1.3474e-116	-0.493468	0.49	0.715	2.69481e-113	2	Ccnb2
1.84139e-115	-0.552323	0.256	0.531	3.68277e-112	2	Wnt6
1.98472e-114	0.378172	0.867	0.746	3.96944e-111	2	Cyfip2
2.80193e-113	-0.365716	0.426	0.625	5.60385e-110	2	Uhrf1
3.0493e-112	0.39972	0.931	0.846	6.09859e-109	2	Dock4
2.27336e-111	0.392259	0.877	0.812	4.54672e-108	2	Serpinb1a
5.14662e-111	-0.501566	0.496	0.736	1.02932e-107	2	Dpf3
1.10239e-110	0.431095	0.958	0.927	2.20478e-107	2	Derl3
3.14384e-110	-0.402529	0.445	0.685	6.28768e-107	2	Rpa2
3.21837e-108	-0.335392	0.317	0.588	6.43675e-105	2	Espn
7.2908e-108	-0.425564	0.47	0.67	1.45816e-104	2	Mcm5
4.23215e-107	0.312	0.874	0.823	8.4643e-104	2	Mef2c
6.64129e-106	0.523626	0.978	0.962	1.32826e-102	2	Cited2
2.17033e-104	-0.592864	0.649	0.801	4.34066e-101	2	Lgals1
5.84984e-103	-0.489349	0.443	0.691	1.16997e-99	2	Atad2
1.75047e-102	-0.403616	0.421	0.657	3.50094e-99	2	Hmmr
2.46034e-101	-0.545817	0.812	0.887	4.92067e-98	2	Nucks1
5.0527e-100	-0.286444	0.355	0.58	1.01054e-96	2	Kif15
6.29377e-100	0.265182	0.699	0.654	1.25875e-96	2	Reln
1.49661e-99	-0.509592	0.677	0.818	2.99323e-96	2	Tmpo
1.66524e-99	-0.558292	0.676	0.806	3.33048e-96	2	Nasp
1.67964e-99	0.372418	0.914	0.843	3.35927e-96	2	Arhgef28
8.41055e-99	-0.522139	0.606	0.784	1.68211e-95	2	Etnk2
1.32082e-98	-0.382474	0.443	0.683	2.64164e-95	2	Tuba1c
1.14087e-95	0.479507	0.863	0.838	2.28175e-92	2	Fam46a
1.81969e-95	-0.514297	0.588	0.758	3.63938e-92	2	Hmgn2
1.04511e-94	0.441128	0.834	0.758	2.09022e-91	2	Rasl10a
1.89699e-93	-0.304111	0.347	0.6	3.79399e-90	2	Dhfr
6.46462e-93	-0.4257	0.369	0.59	1.29292e-89	2	Ccnb1
5.0476e-92	-0.572679	0.386	0.624	1.00952e-88	2	Smc2
1.12944e-91	-0.517796	0.567	0.741	2.25888e-88	2	Lmnb1
9.56544e-91	0.385901	0.939	0.901	1.91309e-87	2	Bcat1
2.64135e-90	-0.571137	0.582	0.757	5.28271e-87	2	Fndc5
1.27744e-89	-0.440678	0.647	0.8	2.55487e-86	2	Serpinf1
5.34841e-88	-0.688157	0.544	0.727	1.06968e-84	2	Cst12
1.72237e-87	-0.339135	0.282	0.537	3.44474e-84	2	Mns1
1.02765e-86	-0.508498	0.909	0.95	2.05529e-83	2	Amhr2
1.33455e-85	-0.445421	0.523	0.729	2.6691e-82	2	Ccdc34
1.05953e-84	-0.430695	0.427	0.636	2.11905e-81	2	Racgap1
1.15524e-83	-0.435638	0.514	0.682	2.31047e-80	2	Spc24
1.16711e-83	-0.392703	0.426	0.677	2.33423e-80	2	Timp3
1.48751e-83	-0.419248	0.551	0.747	2.97501e-80	2	Ezh2
4.93057e-82	-0.412131	0.549	0.758	9.86115e-79	2	Trib2
8.51192e-82	-0.729121	0.358	0.595	1.70238e-78	2	Hist1h1b
1.61018e-81	-0.489977	0.752	0.879	3.22036e-78	2	Myo10
2.20922e-80	-0.510327	0.44	0.635	4.41843e-77	2	Cenpa
8.10957e-80	-0.500748	0.603	0.757	1.62191e-76	2	Mcm7
1.63247e-79	0.374837	0.972	0.946	3.26495e-76	2	Mlf1
1.91587e-79	-0.377509	0.355	0.606	3.83174e-76	2	Hsd11b2
1.25226e-78	-0.310826	0.409	0.675	2.50451e-75	2	Ihh
3.49838e-78	0.326487	0.845	0.761	6.99676e-75	2	Ano4
5.96281e-78	-0.253496	0.474	0.649	1.19256e-74	2	Diaph3
8.51666e-78	-0.353266	0.427	0.634	1.70333e-74	2	Gmnn
1.14057e-76	0.449883	0.884	0.812	2.28115e-73	2	Cyr61
1.43755e-76	-0.543336	0.659	0.783	2.87511e-73	2	Dut
1.44549e-76	-0.736633	0.441	0.622	2.89098e-73	2	Prc1
2.81359e-76	-0.262331	0.263	0.512	5.62719e-73	2	Igfbp6
9.13328e-76	-0.497825	0.407	0.61	1.82666e-72	2	Cited4
1.3952e-75	0.371265	0.993	0.975	2.79041e-72	2	Ywhaq
1.71734e-74	-0.484333	0.217	0.48	3.43469e-71	2	Gm37350
2.2842e-74	-0.636342	0.761	0.87	4.5684e-71	2	Arl6ip1
9.01058e-74	0.327453	0.875	0.808	1.80212e-70	2	Bmpr1b
1.47916e-73	-0.339438	0.597	0.758	2.95832e-70	2	Chp2
2.69057e-73	0.389519	0.959	0.877	5.38113e-70	2	Fst
2.86622e-73	0.308942	1	0.998	5.73244e-70	2	Akr1cl
2.31714e-72	-0.277403	0.315	0.542	4.63429e-69	2	Mis18bp1
2.8034e-72	0.355083	0.868	0.769	5.6068e-69	2	Ubash3b
4.24827e-72	-0.48772	0.911	0.936	8.49653e-69	2	Tpi1
1.93348e-71	-0.599687	0.499	0.651	3.86696e-68	2	Tpx2
2.54056e-71	-0.396316	0.289	0.501	5.08112e-68	2	Gm45889
5.06248e-69	-0.656164	0.687	0.795	1.0125e-65	2	Wfdc10
6.64766e-69	-0.526407	0.435	0.609	1.32953e-65	2	Cenpe
1.07175e-68	-0.473986	0.872	0.909	2.14349e-65	2	Dek
1.91374e-68	-0.3639	0.444	0.648	3.82747e-65	2	Cdca3
4.40698e-68	0.443379	0.735	0.632	8.81396e-65	2	Fbn2
5.60655e-68	-0.407175	0.548	0.699	1.12131e-64	2	Rrm1
1.62808e-67	-0.582358	0.939	0.947	3.25615e-64	2	Ube2s
4.86187e-67	-0.486499	0.437	0.646	9.72375e-64	2	Gtf2a1
6.46491e-67	-0.699542	0.292	0.511	1.29298e-63	2	Gatm
7.86119e-66	0.284682	0.956	0.911	1.57224e-62	2	Cndp2
1.50301e-65	0.27144	0.999	0.985	3.00603e-62	2	Gja1
1.64715e-65	-0.2787	0.407	0.579	3.29429e-62	2	Hs6st2
2.25785e-64	-0.499882	0.477	0.683	4.5157e-61	2	Nnat
4.35785e-64	-0.471124	0.304	0.523	8.7157e-61	2	Cdc20
1.1108e-63	0.307404	0.854	0.833	2.2216e-60	2	Foxp2
2.59701e-63	-0.677435	0.678	0.836	5.19401e-60	2	Neat1
3.26437e-63	0.321363	0.821	0.787	6.52873e-60	2	Serpinb6b
8.72115e-63	-0.288104	0.491	0.674	1.74423e-59	2	Rfc4
8.92205e-63	-0.443631	0.261	0.519	1.78441e-59	2	Rasd1
1.35599e-62	-0.416063	0.938	0.939	2.71198e-59	2	Ranbp1
3.33615e-62	-0.318991	0.587	0.757	6.67231e-59	2	Msmo1
7.67438e-62	-0.261241	0.407	0.611	1.53488e-58	2	Hirip3
8.23745e-62	0.378594	0.882	0.85	1.64749e-58	2	Pim1
3.70482e-61	0.45981	0.806	0.779	7.40964e-58	2	Rarres2
8.52416e-61	0.378812	0.882	0.855	1.70483e-57	2	Tes
1.30034e-60	-0.369417	0.686	0.798	2.60067e-57	2	Plpp3
1.07093e-59	-0.535815	0.428	0.623	2.14186e-56	2	Cks2
2.13993e-58	-0.266624	0.461	0.608	4.27986e-55	2	Bub1b
2.2944e-58	-0.351792	0.674	0.818	4.5888e-55	2	Gata6
3.47498e-57	-0.254986	0.455	0.607	6.94996e-54	2	Esco2
5.04841e-57	-0.345515	0.522	0.694	1.00968e-53	2	Usp1
1.69078e-56	-0.318368	0.992	0.983	3.38157e-53	2	Ldhb
2.44492e-56	-0.263806	0.499	0.711	4.88984e-53	2	Creld2
2.89164e-56	-0.496908	0.486	0.664	5.78327e-53	2	H2afx
3.86991e-56	-0.532073	0.621	0.789	7.73982e-53	2	Meg3
5.21379e-56	-0.652843	0.861	0.921	1.04276e-52	2	Sdc4
2.09578e-55	-0.391991	0.891	0.93	4.19157e-52	2	Jpt1
2.59606e-55	-0.399175	0.236	0.448	5.19211e-52	2	Mical2
6.52403e-55	-0.448119	0.699	0.815	1.30481e-51	2	Ptges
7.97585e-55	-0.411485	0.686	0.815	1.59517e-51	2	Rap2b
4.81112e-54	-0.328957	0.487	0.674	9.62224e-51	2	Ckap5
2.30076e-53	-0.37639	0.996	0.994	4.60153e-50	2	Hsp90b1
2.64247e-53	-0.413092	0.702	0.807	5.28495e-50	2	Mcm6
3.3663e-53	-0.365151	0.76	0.875	6.7326e-50	2	Myo1e
8.82609e-53	-0.322177	0.479	0.635	1.76522e-49	2	Dnmt1
1.3226e-52	-0.490224	0.485	0.643	2.6452e-49	2	Incenp
1.84921e-52	-0.379958	0.717	0.804	3.69841e-49	2	Cks1b
5.10799e-52	0.308306	0.891	0.844	1.0216e-48	2	Plagl1
5.3978e-52	-0.350406	0.337	0.533	1.07956e-48	2	Hist1h2ae
2.64318e-51	-0.467954	0.347	0.542	5.28636e-48	2	Aard
6.15428e-50	-0.309505	0.344	0.52	1.23086e-46	2	Kif11
2.69091e-49	-0.335404	0.587	0.74	5.38182e-46	2	Rad21
2.3875e-48	-0.334729	0.322	0.511	4.775e-45	2	Kif20b
4.13384e-47	-0.294173	0.419	0.596	8.26769e-44	2	Dtl
2.05312e-45	-0.252384	0.36	0.529	4.10624e-42	2	Kif4
2.15745e-45	-0.280436	0.608	0.758	4.31489e-42	2	Krt8
1.63898e-44	-0.277208	0.429	0.607	3.27797e-41	2	Myl9
3.42714e-44	-0.37277	0.555	0.679	6.85427e-41	2	Nrn1
5.57422e-44	0.30884	0.681	0.611	1.11484e-40	2	Hbegf
1.72949e-43	-0.50416	0.662	0.757	3.45898e-40	2	Rasgef1b
4.96687e-43	-0.285623	0.431	0.581	9.93373e-40	2	Tacc3
7.57287e-43	0.295442	0.951	0.921	1.51457e-39	2	Txnip
8.17674e-43	-0.251073	0.419	0.585	1.63535e-39	2	Peg3
6.41014e-42	-0.333879	0.468	0.613	1.28203e-38	2	Tyms
2.14268e-41	0.310204	0.954	0.941	4.28536e-38	2	Klf6
3.87912e-41	-0.428007	0.391	0.542	7.75824e-38	2	Nusap1
4.01481e-41	-0.291459	0.377	0.535	8.02963e-38	2	Kif22
6.24446e-41	-0.368509	0.306	0.491	1.24889e-37	2	Cbfa2t3
3.34675e-40	-0.305593	0.397	0.509	6.6935e-37	2	Gldn
7.25883e-40	-0.308528	0.423	0.558	1.45177e-36	2	Ccna2
2.70241e-38	-0.268554	0.576	0.723	5.40481e-35	2	Phgdh
2.91861e-38	-0.295873	0.401	0.573	5.83722e-35	2	Emx2
7.72892e-38	-0.462125	0.679	0.779	1.54578e-34	2	Mphosph8
3.6421e-37	-0.268961	0.466	0.614	7.28421e-34	2	Topbp1
1.03388e-36	-0.292597	0.53	0.703	2.06777e-33	2	Id1
3.11e-36	0.25237	0.932	0.903	6.21999e-33	2	Arhgap28
4.43938e-36	-0.289359	0.755	0.831	8.87876e-33	2	C1galt1
2.58106e-35	-0.479287	0.53	0.634	5.16213e-32	2	Fbxo21
9.02516e-35	-0.323923	0.776	0.859	1.80503e-31	2	Lmna
1.76771e-34	-0.364811	0.825	0.839	3.53541e-31	2	Selenoh
3.86542e-34	-0.265337	0.422	0.57	7.73083e-31	2	Spc25
5.76115e-34	-0.355142	0.567	0.707	1.15223e-30	2	Tacc1
1.18209e-33	-0.261129	0.442	0.6	2.36418e-30	2	Scarb1
3.08589e-33	0.440275	0.737	0.704	6.17179e-30	2	Cxcl1
5.6589e-33	-0.46727	0.974	0.975	1.13178e-29	2	Htra1
5.22646e-32	-0.721141	0.296	0.469	1.04529e-28	2	Igfbp5
1.47354e-31	-0.345244	0.975	0.958	2.94708e-28	2	Ran
2.48914e-31	-0.296219	0.919	0.949	4.97828e-28	2	Arhgap29
3.28162e-31	-0.370635	0.636	0.728	6.56324e-28	2	Rgcc
3.76339e-31	-0.263027	0.502	0.655	7.52678e-28	2	Dsp
7.02914e-31	-0.341172	0.756	0.824	1.40583e-27	2	Nt5dc2
1.54371e-30	-0.25128	0.496	0.662	3.08742e-27	2	Igfbp2
2.22443e-30	-0.389176	0.287	0.462	4.44885e-27	2	Cdk1
4.00275e-30	-0.434318	0.984	0.985	8.00551e-27	2	Serpinb6a
5.42422e-30	-0.32452	0.765	0.85	1.08484e-26	2	2810474O19Rik
5.86066e-30	-0.571781	0.597	0.687	1.17213e-26	2	Smc4
1.2921e-29	-0.338727	0.43	0.54	2.5842e-26	2	Kif23
2.91741e-29	-0.270134	0.423	0.553	5.83482e-26	2	Aspm
1.13471e-26	-0.288133	0.428	0.558	2.26943e-23	2	Gsta4
1.46358e-26	-0.270315	0.376	0.531	2.92716e-23	2	Spin2c
6.31198e-26	-0.263473	0.493	0.606	1.2624e-22	2	Tdrp
8.51035e-24	-0.342938	0.677	0.755	1.70207e-20	2	Crip2
2.3717e-23	-0.466042	0.671	0.759	4.74339e-20	2	Gadd45g
8.33144e-23	-0.275352	0.572	0.663	1.66629e-19	2	Fam81a
1.66177e-22	-0.296331	0.587	0.664	3.32354e-19	2	Cenpm
6.39221e-22	-0.389459	0.477	0.579	1.27844e-18	2	Hells
9.5645e-22	0.251604	0.991	0.979	1.9129e-18	2	Fos
1.09838e-20	-0.269441	0.899	0.934	2.19676e-17	2	Fscn1
1.11333e-20	-0.273889	0.47	0.586	2.22666e-17	2	Slc26a7
1.70921e-20	-0.353412	0.506	0.581	3.41842e-17	2	Pbk
1.90083e-19	-0.321537	0.693	0.754	3.80166e-16	2	Hsd17b1
1.98433e-19	-0.285442	0.205	0.402	3.96865e-16	2	Gm14226
1.82273e-18	-0.330034	0.836	0.869	3.64545e-15	2	Eno1
1.10734e-17	-0.284021	0.997	0.993	2.21468e-14	2	Gapdh
1.11075e-16	-0.3349	0.785	0.824	2.22151e-13	2	Wt1
1.76751e-15	-0.256	0.4	0.524	3.53503e-12	2	Aldh1a1
4.14747e-15	0.320223	0.887	0.879	8.29495e-12	2	Apoa1
2.39247e-13	-0.458158	0.745	0.786	4.78494e-10	2	Vim
2.5052e-12	-0.283298	1	1	5.01039e-09	2	Malat1
3.47034e-09	-0.268737	0.724	0.757	6.94068e-06	2	H1fx
6.26254e-07	-0.361106	0.623	0.673	0.00125251	2	Tuba1a
7.38196e-06	-0.359941	0.807	0.87	0.0147639	2	Gm26917
1.17867e-05	-0.300759	0.602	0.651	0.0235735	2	Col4a1
0.000110371	-0.250081	0.869	0.908	0.220742	2	Ier3
0	1.59067	0.884	0.412	0	3	Igfbp5
0	1.51765	0.95	0.66	0	3	Wnt4
0	1.51352	0.96	0.612	0	3	AC167229.1
0	1.40183	0.991	0.814	0	3	Kctd14
0	1.3446	0.988	0.844	0	3	Gstm2
0	1.30984	0.984	0.714	0	3	Gas6
0	1.2961	0.963	0.658	0	3	Itga6
0	1.24677	0.872	0.565	0	3	Cited4
0	1.1031	0.935	0.723	0	3	Fndc5
0	1.09541	0.866	0.472	0	3	Wnt6
0	1.06901	0.882	0.589	0	3	Kitl
0	1.02516	0.987	0.909	0	3	Sdc4
0	1.02025	0.9	0.598	0	3	Fbxo21
0	0.916152	0.883	0.49	0	3	H19
0	0.900007	0.865	0.534	0	3	Espn
0	0.865076	0.998	0.941	0	3	Amhr2
0	0.8422	0.866	0.455	0	3	Gatm
0	0.630815	0.999	0.982	0	3	Ldhb
1.46415e-295	0.76248	0.916	0.566	2.9283e-292	3	Col18a1
2.33048e-286	0.6119	0.828	0.508	4.66096e-283	3	Cntn4
4.13606e-276	0.832338	0.793	0.395	8.27213e-273	3	Mical2
4.94975e-274	0.994826	0.946	0.688	9.89951e-271	3	Cst12
8.92711e-274	0.819	0.809	0.451	1.78542e-270	3	Gm45889
2.37823e-271	0.820204	0.828	0.503	4.75646e-268	3	Shtn1
1.45477e-259	0.695466	0.997	0.943	2.90955e-256	3	Isyna1
9.79705e-259	0.409543	0.774	0.463	1.95941e-255	3	Tgfbi
1.1835e-252	0.700111	0.934	0.667	2.367e-249	3	Adgrg1
4.40528e-248	0.796776	0.933	0.81	8.81056e-245	3	Wt1
1.05538e-246	0.697781	0.866	0.685	2.11075e-243	3	Ppfibp2
1.4035e-245	0.677831	0.974	0.821	2.807e-242	3	Sparc
1.90901e-245	0.782428	0.939	0.751	3.81802e-242	3	Etnk2
9.196e-244	0.853633	0.887	0.676	1.8392e-240	3	Tacc1
2.68868e-233	0.290587	0.859	0.646	5.37736e-230	3	Cygb
2.0212e-227	0.411136	0.847	0.625	4.0424e-224	3	Bcam
2.33455e-225	0.682275	0.92	0.695	4.66909e-222	3	Dpf3
4.7033e-220	0.643889	0.77	0.473	9.4066e-217	3	Gldn
4.84713e-219	0.615631	0.93	0.773	9.69427e-216	3	Serpinf1
2.06314e-218	0.61793	0.916	0.63	4.12628e-215	3	Timp3
1.52343e-214	-0.41183	0.558	0.775	3.04686e-211	3	Sel1l3
2.11901e-208	0.962454	0.789	0.499	4.23802e-205	3	Aard
8.23951e-205	0.61889	0.936	0.805	1.6479e-201	3	Tmem184a
5.33072e-199	-0.50045	0.466	0.746	1.06614e-195	3	Uchl1
2.24298e-195	0.83398	0.989	0.928	4.48597e-192	3	Tnni3
7.05601e-193	0.765522	0.796	0.467	1.4112e-189	3	Rasd1
2.56072e-192	-0.457125	0.539	0.755	5.12145e-189	3	2024-09-11
2.5905e-191	0.627232	0.795	0.575	5.181e-188	3	Pcsk6
2.12448e-187	0.741151	0.953	0.785	4.24897e-184	3	Apoe
6.19854e-187	0.743743	0.783	0.536	1.23971e-183	3	Emx2
2.17256e-181	0.616522	0.852	0.678	4.34512e-178	3	Pla2g1b
1.31948e-171	-0.278976	0.351	0.6	2.63897e-168	3	Cenpp
1.03383e-165	0.633312	0.979	0.94	2.06767e-162	3	Soat1
6.39102e-165	-0.490449	0.579	0.707	1.2782e-161	3	Thbs4
4.25387e-164	0.534557	0.896	0.688	8.50774e-161	3	Dusp5
2.09881e-163	0.63989	0.932	0.774	4.19761e-160	3	Plpp3
1.32124e-162	-0.315363	0.731	0.74	2.64248e-159	3	Edn1
4.95306e-160	-0.436679	0.703	0.753	9.90612e-157	3	Dnajb13
4.84528e-159	0.499665	0.749	0.514	9.69057e-156	3	Lgals7
9.31052e-158	0.405541	0.96	0.89	1.8621e-154	3	Maged2
1.35629e-156	-0.3412	0.638	0.731	2.71257e-153	3	Nexn
3.74541e-156	0.583254	0.937	0.845	7.49082e-153	3	Myo1b
3.27533e-154	0.691168	0.776	0.573	6.55066e-151	3	Myl9
8.53441e-154	0.58352	0.982	0.943	1.70688e-150	3	Arhgap29
1.43838e-153	0.338145	0.867	0.647	2.87676e-150	3	Krt18
6.48956e-151	0.610894	0.74	0.449	1.29791e-147	3	Cbfa2t3
2.13319e-150	0.902887	0.971	0.898	4.26638e-147	3	Ier3
2.45103e-150	0.362707	0.669	0.389	4.90206e-147	3	Sulf1
8.79291e-150	-0.467626	0.541	0.679	1.75858e-146	3	Spc24
7.13819e-147	-0.512643	0.661	0.799	1.42764e-143	3	Tox2
8.16055e-147	0.474982	0.703	0.447	1.63211e-143	3	Mapk13
2.61326e-137	0.407846	0.91	0.723	5.22652e-134	3	Tmsb4x
2.2523e-136	0.62788	0.824	0.617	4.5046e-133	3	Defb19
3.72884e-136	0.539947	0.948	0.86	7.45768e-133	3	Myo10
2.30236e-135	0.727926	0.893	0.775	4.60472e-132	3	Wfdc10
5.83125e-135	-0.420143	0.565	0.775	1.16625e-131	3	Cyfip2
1.34752e-133	-0.51935	0.969	0.981	2.69504e-130	3	Hspd1
2.34852e-132	0.649146	0.95	0.809	4.69705e-129	3	Neat1
4.77815e-131	-0.432346	0.63	0.782	9.5563e-128	3	Ano4
2.77764e-128	0.274032	0.862	0.57	5.55529e-125	3	Tdrp
4.09999e-127	0.470882	1	1	8.19997e-124	3	Malat1
7.19597e-126	-0.538335	0.748	0.825	1.43919e-122	3	Serpinb1a
1.31944e-125	-0.406486	0.495	0.67	2.63889e-122	3	Fam81a
4.35319e-124	-0.524148	0.654	0.817	8.70638e-121	3	Zfp277
3.57586e-122	-0.276147	0.351	0.537	7.15173e-119	3	Kif22
2.21128e-120	-0.521701	0.602	0.769	4.42257e-117	3	Ppa1
1.53217e-118	-0.259295	0.65	0.69	3.06434e-115	3	Gm13889
8.89983e-116	0.293532	0.719	0.463	1.77997e-112	3	Col6a3
1.70407e-115	-0.521336	0.798	0.83	3.40814e-112	3	Evc2
3.46906e-115	0.655512	0.793	0.611	6.93811e-112	3	Gtf2a1
4.33881e-115	-0.311091	0.543	0.7	8.67762e-112	3	Dnph1
4.82728e-115	0.61448	0.782	0.589	9.65457e-112	3	Adgrf5
5.74988e-113	-0.352265	0.544	0.668	1.14998e-109	3	Cenpm
3.60445e-112	-0.382005	0.491	0.623	7.2089e-109	3	Ckb
1.24745e-108	0.564399	0.7	0.433	2.4949e-105	3	Gm37350
2.46563e-108	0.549927	0.639	0.392	4.93126e-105	3	E330013P04Rik
3.37876e-108	-0.539062	0.98	0.984	6.75753e-105	3	Serpine2
6.35087e-107	0.351556	0.903	0.733	1.27017e-103	3	Crip2
7.13462e-106	-0.353954	0.431	0.588	1.42692e-102	3	Pbk
1.29572e-105	0.508548	0.618	0.298	2.59145e-102	3	Tmem171
5.14537e-105	-0.39414	0.54	0.725	1.02907e-101	3	Fdxr
5.58683e-104	-0.538705	0.62	0.755	1.11737e-100	3	Mcm7
3.1132e-103	-0.474324	0.679	0.739	6.2264e-100	3	Mpped2
3.50958e-103	0.602338	0.676	0.472	7.01917e-100	3	Igfbp6
8.77795e-102	0.505809	0.732	0.549	1.75559e-98	3	Mt3
1.35745e-101	0.472081	0.978	0.906	2.71489e-98	3	Kazald1
2.81884e-101	0.521199	0.803	0.629	5.63768e-98	3	Phlda1
2.48223e-100	-0.362219	0.569	0.798	4.96446e-97	3	Ubash3b
4.37864e-100	-0.514449	0.917	0.941	8.75729e-97	3	Ranbp1
1.02097e-97	-0.495442	0.524	0.682	2.04195e-94	3	Atad2
1.66036e-97	0.344055	0.803	0.569	3.32073e-94	3	Irx3
3.61755e-96	-0.530717	0.677	0.713	7.2351e-93	3	Bmp2
4.67695e-96	-0.42596	0.969	0.975	9.35391e-93	3	Txnl1
5.04093e-96	0.349961	0.924	0.807	1.00819e-92	3	Atp1b1
5.02926e-95	-0.520326	0.46	0.606	1.00585e-91	3	Cenpe
4.44027e-92	-0.393443	0.719	0.796	8.88054e-89	3	Jam2
4.72436e-92	-0.396686	0.568	0.697	9.44872e-89	3	Rrm1
5.16566e-90	0.449816	0.91	0.795	1.03313e-86	3	Gata6
5.1969e-90	-0.311848	0.632	0.723	1.03938e-86	3	Vpreb3
6.22321e-88	0.311224	0.777	0.574	1.24464e-84	3	Cxcl10
4.80441e-87	-0.509141	0.915	0.932	9.60881e-84	3	Fscn1
5.27582e-86	0.420323	0.622	0.339	1.05516e-82	3	Gm2044
6.33859e-86	-0.423862	0.275	0.462	1.26772e-82	3	Cdk1
8.55429e-85	-0.488183	0.555	0.71	1.71086e-81	3	Akr1c14
5.06808e-83	-0.379835	0.717	0.786	1.01362e-79	3	Aebp1
4.40939e-82	-0.516862	0.908	0.936	8.81878e-79	3	Tpi1
9.2325e-82	0.397613	0.826	0.655	1.8465e-78	3	Irf1
1.49248e-81	-0.3176	0.381	0.515	2.98495e-78	3	Kif11
4.71098e-79	0.50458	0.922	0.76	9.42196e-76	3	Meg3
9.93154e-78	0.288319	0.973	0.9	1.98631e-74	3	Amh
3.1705e-77	-0.415747	0.79	0.82	6.341e-74	3	Itm2a
3.71658e-77	0.358973	0.72	0.488	7.43315e-74	3	Egr2
1.47886e-76	-0.526929	0.89	0.926	2.95772e-73	3	Txnip
6.61844e-76	0.74879	0.656	0.517	1.32369e-72	3	Ifitm1
1.97107e-75	0.506261	0.862	0.798	3.94214e-72	3	Rap2b
2.36199e-75	-0.537754	0.704	0.753	4.72398e-72	3	Hsd17b1
4.05798e-74	-0.379736	0.787	0.854	8.11597e-71	3	Dctpp1
1.67922e-73	-0.490908	0.922	0.951	3.35843e-70	3	Nr5a2
3.52228e-73	-0.4396	0.996	0.994	7.04455e-70	3	Hsp90b1
3.69044e-73	0.455264	0.621	0.42	7.38088e-70	3	Alcam
3.07122e-72	-0.409317	0.729	0.861	6.14244e-69	3	Arhgef28
4.85254e-72	-0.280523	0.366	0.506	9.70507e-69	3	Kif20b
3.16339e-71	-0.48698	0.741	0.795	6.32678e-68	3	Serpinb6b
4.08802e-71	-0.335436	0.469	0.59	8.17603e-68	3	Dtl
2.32136e-70	-0.481241	0.912	0.916	4.64271e-67	3	Igf1
3.24746e-68	0.433804	0.841	0.776	6.49491e-65	3	Ptch1
6.17034e-68	-0.402671	0.594	0.657	1.23407e-64	3	Mcm5
1.08894e-66	-0.363349	0.492	0.564	2.17788e-63	3	Adamts5
1.89389e-66	-0.441081	0.631	0.734	3.78778e-63	3	Lmnb1
1.14121e-65	-0.442799	0.883	0.865	2.28242e-62	3	Ptpre
4.97208e-65	0.28873	0.839	0.668	9.94415e-62	3	Errfi1
1.06717e-62	0.324318	0.879	0.732	2.13435e-59	3	Krt8
3.94792e-62	-0.32172	0.654	0.69	7.89584e-59	3	Fbxo32
1.34656e-61	0.308088	0.928	0.879	2.69313e-58	3	Thbs1
1.6697e-61	-0.38926	0.786	0.857	3.3394e-58	3	Odc1
4.13728e-61	0.535957	0.849	0.742	8.27456e-58	3	Gadd45g
8.19163e-61	-0.400909	0.755	0.826	1.63833e-57	3	Nexmif
1.07766e-60	-0.453539	0.485	0.578	2.15531e-57	3	Hells
1.24468e-60	-0.307328	0.637	0.727	2.48936e-57	3	Mctp1
6.76431e-60	-0.40631	0.991	0.984	1.35286e-56	3	Cyb5a
2.03619e-59	-0.43667	0.786	0.843	4.07239e-56	3	Selenoh
3.13093e-58	-0.250284	0.474	0.587	6.26186e-55	3	Dhfr
8.78944e-58	-0.44105	0.562	0.622	1.75789e-54	3	Racgap1
5.02724e-57	0.672468	0.621	0.46	1.00545e-53	3	1190002N15Rik
8.72194e-56	0.301129	0.902	0.787	1.74439e-52	3	Ly6e
1.85882e-55	0.321551	0.979	0.93	3.71764e-52	3	Socs2
3.91241e-55	-0.250322	0.476	0.619	7.82482e-52	3	Net1
5.82781e-55	-0.404642	0.667	0.762	1.16556e-51	3	H1fx
9.43034e-55	-0.347496	0.591	0.621	1.88607e-51	3	Slc38a3
6.67636e-54	-0.310808	0.472	0.553	1.33527e-50	3	Ccna2
1.69989e-53	-0.406579	0.657	0.634	3.39978e-50	3	Hmmr
2.05065e-53	0.482248	0.63	0.499	4.10129e-50	3	Col6a1
4.28314e-53	0.395957	0.826	0.741	8.56628e-50	3	Rasgef1b
4.88334e-53	-0.454424	0.42	0.511	9.76667e-50	3	Cdc20
1.51111e-52	-0.353651	0.996	0.994	3.02222e-49	3	Map1b
2.98796e-52	-0.445154	0.702	0.778	5.97592e-49	3	Dut
6.5673e-51	-0.395943	0.765	0.842	1.31346e-47	3	Foxp2
7.77716e-51	-0.381836	0.587	0.634	1.55543e-47	3	Cdca3
1.01813e-50	-0.377571	0.758	0.784	2.03626e-47	3	Ext1
9.64975e-49	-0.33789	0.545	0.613	1.92995e-45	3	Uhrf1
4.40976e-48	0.285213	0.676	0.514	8.81953e-45	3	Hsd17b7
3.62217e-47	-0.278566	0.625	0.666	7.24433e-44	3	Tmem97
9.81069e-47	0.339888	0.599	0.394	1.96214e-43	3	Gucy1a1
1.97995e-45	-0.507842	0.56	0.615	3.9599e-42	3	Ghr
2.16378e-45	0.307598	0.585	0.365	4.32757e-42	3	Gm14226
2.27402e-45	0.392395	0.658	0.499	4.54804e-42	3	Aldh1a1
3.22144e-45	-0.302038	0.601	0.644	6.44288e-42	3	Cdc42ep3
9.31738e-45	-0.447113	0.522	0.61	1.86348e-41	3	Smc2
6.2494e-43	-0.294846	0.778	0.828	1.24988e-39	3	Ehd4
1.22654e-42	-0.359622	0.702	0.776	2.45307e-39	3	Mycl
3.36822e-42	-0.312341	0.725	0.707	6.73644e-39	3	Slc25a13
4.53264e-42	-0.294811	0.528	0.572	9.06528e-39	3	Tacc3
2.8314e-41	-0.298446	0.636	0.659	5.66281e-38	3	Rfc4
8.331e-41	-0.370108	0.894	0.907	1.6662e-37	3	Dek
4.71087e-39	-0.449318	0.671	0.664	9.42173e-36	3	Slc6a6
1.07903e-37	-0.371093	0.629	0.665	2.15807e-34	3	H2-D1
2.35958e-37	-0.254042	0.835	0.903	4.71916e-34	3	Nfkbia
2.93474e-37	-0.327644	0.725	0.783	5.86948e-34	3	Cnmd
1.26777e-36	-0.25884	0.653	0.712	2.53554e-33	3	Cxcl1
7.49197e-36	-0.284104	0.58	0.57	1.49839e-32	3	Ntng1
2.54209e-34	-0.338009	0.815	0.881	5.08419e-31	3	Col9a2
3.42239e-34	-0.266847	0.581	0.625	6.84478e-31	3	Dnmt1
4.24838e-34	-0.332754	0.703	0.731	8.49675e-31	3	Ezh2
5.33987e-33	0.253461	0.966	0.919	1.06797e-29	3	Junb
1.48083e-32	0.316147	0.516	0.289	2.96166e-29	3	Tmem114
5.39605e-32	-0.519172	0.615	0.618	1.07921e-28	3	Cenpa
1.01976e-30	-0.456019	0.873	0.893	2.03953e-27	3	Mmp11
1.72373e-30	-0.290558	0.644	0.612	3.44746e-27	3	Ccdc3
8.94713e-29	0.372764	0.553	0.457	1.78943e-25	3	Col6a2
4.41936e-28	-0.357458	0.806	0.802	8.83871e-25	3	Arrdc3
7.67644e-28	-0.48689	0.987	0.993	1.53529e-24	3	Cst3
8.37292e-28	-0.266882	0.66	0.69	1.67458e-24	3	Gramd1b
1.7117e-27	-0.256525	0.379	0.438	3.42339e-24	3	Rrm2
3.09589e-27	0.308366	0.601	0.489	6.19177e-24	3	Arl4c
7.43101e-27	-0.299585	0.767	0.796	1.4862e-23	3	Nasp
1.51631e-25	-0.313364	0.686	0.673	3.03262e-22	3	Cyp1b1
1.82621e-25	-0.258702	0.609	0.599	3.65242e-22	3	Knstrn
4.0666e-25	-0.253245	0.633	0.666	8.1332e-22	3	Rpa2
2.89914e-24	-0.352732	0.875	0.918	5.79827e-21	3	Kcnq1ot1
5.00104e-24	-0.275701	0.973	0.986	1.00021e-20	3	Serpinb6a
1.82444e-23	-0.321821	0.876	0.881	3.64888e-20	3	Nucks1
9.91257e-23	0.348081	0.524	0.347	1.98251e-19	3	Gstm6
2.24136e-22	-0.296007	0.592	0.6	4.48271e-19	3	Tyms
3.93822e-22	0.259305	0.661	0.561	7.87644e-19	3	Peg3
1.14801e-21	-0.258185	0.661	0.571	2.29602e-18	3	Pparg
3.93993e-21	-0.447727	0.585	0.607	7.87986e-18	3	Cks2
3.20837e-20	-0.293453	0.981	0.98	6.41673e-17	3	Fos
3.5863e-20	-0.457193	0.632	0.628	7.1726e-17	3	Incenp
1.02766e-19	-0.444455	0.74	0.718	2.05533e-16	3	Hspb1
2.6564e-19	-0.257318	0.729	0.744	5.3128e-16	3	Hmgn2
6.54706e-18	-0.366983	0.698	0.632	1.30941e-14	3	Knl1
1.44036e-17	-0.35132	0.656	0.612	2.88072e-14	3	Gmnn
1.83054e-17	-0.367107	0.761	0.726	3.66109e-14	3	Kcnk2
2.4375e-17	-0.495272	0.984	0.968	4.87501e-14	3	Tuba1b
2.9338e-14	-0.272601	0.566	0.555	5.8676e-11	3	Spc25
1.02232e-13	-0.414459	0.579	0.569	2.04463e-10	3	Ccnb1
1.81415e-13	-0.427833	0.945	0.918	3.62829e-10	3	Tubb4b
3.90606e-11	-0.42753	0.542	0.527	7.81212e-08	3	Nusap1
3.47227e-10	-0.251097	0.674	0.598	6.94455e-07	3	Gas2l3
7.18634e-09	-0.300677	0.517	0.515	1.43727e-05	3	Hist1h2ae
1.64054e-07	-0.541687	0.662	0.649	0.000328108	3	Acta2
4.87541e-07	-0.377059	0.779	0.65	0.000975082	3	Tagln
5.63211e-07	0.253848	0.718	0.734	0.00112642	3	Ddit4l
1.23766e-06	-0.293452	0.783	0.778	0.00247533	3	Klf2
2.48125e-06	-0.368889	0.809	0.78	0.0049625	3	Mgp
3.82909e-06	-0.271677	0.619	0.554	0.00765818	3	Kif15
5.99208e-05	-0.34244	0.737	0.725	0.119842	3	Ctgf
0.000249926	-0.306948	0.563	0.496	0.499852	3	Nppc
0.00182623	-0.370603	0.655	0.64	1	3	Fbn2
0.00399679	-0.351177	0.78	0.783	1	3	Vim
0.00508781	-0.270071	0.679	0.644	1	3	H2afx
0.00620846	-0.281637	0.628	0.533	1	3	Aspm
0	1.2061	0.981	0.669	0	4	Mcm3
0	1.03353	0.983	0.767	0	4	Lig1
0	1.0037	0.984	0.781	0	4	Mcm6
0	0.987932	0.959	0.626	0	4	Mcm5
0	0.954136	0.937	0.539	0	4	Hells
0	0.929882	0.889	0.614	0	4	Pclaf
0	0.910956	0.997	0.952	0	4	Ldha
0	0.901371	0.983	0.723	0	4	Mcm7
0	0.826191	0.882	0.583	0	4	Uhrf1
0	0.798388	0.98	0.754	0	4	Dut
0	0.759944	0.98	0.778	0	4	Nasp
0	0.758378	0.933	0.598	0	4	Mcm4
0	0.743861	1	0.993	0	4	Mif
0	0.727285	0.894	0.561	0	4	Ung
0	0.72375	0.98	0.735	0	4	Ppa1
0	0.719704	0.997	0.934	0	4	Ranbp1
0	0.685987	0.999	0.956	0	4	Ran
0	0.675091	1	0.978	0	4	Hspd1
0	0.665204	0.882	0.552	0	4	Dhfr
0	0.625729	0.874	0.592	0	4	E2f1
0	0.6027	0.85	0.458	0	4	Mcm2
4.19317e-304	0.508016	0.831	0.497	8.38634e-301	4	Chaf1b
3.97404e-298	0.510705	0.832	0.514	7.94808e-295	4	Chaf1a
3.15956e-292	0.774218	0.994	0.904	6.31912e-289	4	Manf
7.53726e-275	0.574318	0.881	0.593	1.50745e-271	4	Gmnn
2.91104e-274	0.663455	1	0.989	5.82208e-271	4	H2afz
9.05438e-271	0.482007	0.783	0.454	1.81088e-267	4	Cdt1
8.77424e-270	0.631842	0.999	0.967	1.75485e-266	4	Tuba1b
1.52956e-267	0.584222	0.916	0.641	3.05911e-264	4	Rpa2
8.54346e-263	0.493753	0.857	0.475	1.70869e-259	4	Tipin
4.48575e-262	0.6808	1	0.992	8.97151e-259	4	Gapdh
1.05007e-261	0.490294	0.84	0.544	2.10015e-258	4	Gins2
6.27189e-248	0.579422	0.97	0.805	1.25438e-244	4	Nt5dc2
5.64382e-247	0.739835	1	0.973	1.12876e-243	4	Htra1
3.22344e-244	0.538693	0.884	0.598	6.44688e-241	4	Dnmt1
8.70659e-243	0.719496	0.992	0.928	1.74132e-239	4	Tpi1
1.68584e-237	0.482707	0.852	0.511	3.37168e-234	4	Pcna
1.89523e-231	0.455673	0.904	0.641	3.79046e-228	4	Tmem97
4.96883e-230	0.672698	0.984	0.845	9.93765e-227	4	Pgk1
9.51193e-226	0.570698	0.889	0.649	1.90239e-222	4	Atad2
1.71722e-225	0.484686	0.916	0.632	3.43443e-222	4	Dnajc9
4.82886e-224	0.468463	0.869	0.577	9.65773e-221	4	Tyms
2.34333e-219	0.507339	0.825	0.559	4.68667e-216	4	Dtl
1.55231e-218	0.642441	0.99	0.926	3.10462e-215	4	Fscn1
6.87079e-211	0.497558	0.98	0.837	1.37416e-207	4	Dctpp1
4.17613e-209	0.70458	0.979	0.856	8.35227e-206	4	Eno1
4.59621e-209	0.324456	0.76	0.547	9.19241e-206	4	Rad51
4.63502e-208	0.417719	0.887	0.637	9.27004e-205	4	Rfc4
2.29772e-206	0.527766	0.997	0.922	4.59544e-203	4	Carhsp1
1.09302e-205	0.468499	0.904	0.667	2.18604e-202	4	Rrm1
1.13515e-199	-1.04685	0.989	0.994	2.27029e-196	4	Sox4
3.66504e-198	0.571479	1	0.998	7.33009e-195	4	Inha
9.58588e-196	0.470579	0.928	0.657	1.91718e-192	4	Usp1
1.79932e-192	0.618666	0.935	0.744	3.59864e-189	4	Slc38a5
1.94952e-191	0.517466	0.955	0.817	3.89903e-188	4	Evc2
2.60771e-189	0.443724	0.786	0.584	5.21542e-186	4	Clspn
6.71832e-186	0.38802	0.889	0.669	1.34366e-182	4	Dnph1
1.48691e-185	0.514917	0.911	0.673	2.97381e-182	4	Creld2
1.695e-185	0.475987	0.989	0.898	3.39e-182	4	Dek
5.03379e-185	0.450105	0.812	0.494	1.00676e-181	4	Sdf2l1
4.76023e-182	0.421183	0.752	0.509	9.52046e-179	4	Ank1
1.84302e-176	0.34367	0.724	0.501	3.68603e-173	4	Ccne2
6.40003e-174	0.5075	0.999	0.993	1.28001e-170	4	Hsp90b1
7.24132e-174	0.541149	0.957	0.731	1.44826e-170	4	Hsd17b1
9.4373e-174	0.49505	0.933	0.691	1.88746e-170	4	Phgdh
1.82302e-172	0.514372	0.992	0.909	3.64605e-169	4	Igf1
1.63254e-171	0.334255	0.84	0.642	3.26508e-168	4	Cenpm
5.50766e-171	0.472546	0.867	0.637	1.10153e-167	4	Fam81a
9.22806e-166	0.824162	0.988	0.899	1.84561e-162	4	Amh
1.1237e-165	0.441531	0.678	0.445	2.2474e-162	4	Cdc6
4.74634e-164	0.570904	0.997	0.903	9.49269e-161	4	Fam13a
2.54909e-160	0.525967	0.995	0.949	5.09817e-157	4	Psma2
3.02037e-159	0.388814	1	0.991	6.04074e-156	4	Tubb5
2.53849e-158	0.323966	0.721	0.436	5.07698e-155	4	Fen1
7.55987e-158	0.304968	0.801	0.629	1.51197e-154	4	Sema3g
9.26149e-157	0.337797	0.869	0.738	1.8523e-153	4	Dnajb13
5.34539e-156	0.420269	0.976	0.826	1.06908e-152	4	Selenoh
8.68039e-156	0.300407	0.724	0.509	1.73608e-152	4	Rad51ap1
3.42289e-154	0.438573	0.947	0.774	6.84578e-151	4	Tox2
2.49816e-153	0.410287	0.969	0.782	4.99633e-150	4	Cks1b
3.56428e-153	-0.878058	0.995	0.993	7.12857e-150	4	Clu
6.59767e-150	0.260499	0.686	0.454	1.31953e-146	4	Mcm10
8.62332e-148	0.445146	0.911	0.664	1.72466e-144	4	Car14
1.11401e-147	0.43717	0.999	0.973	2.22801e-144	4	Stmn1
1.99879e-147	0.370924	0.754	0.563	3.99758e-144	4	Prim1
5.71755e-147	0.470085	0.933	0.789	1.14351e-143	4	Tex15
5.01819e-142	0.427163	0.964	0.789	1.00364e-138	4	Zfp277
3.3672e-141	0.318644	0.876	0.579	6.7344e-138	4	Smc2
4.63793e-141	0.414401	0.919	0.756	9.27586e-138	4	Ano4
5.13016e-141	0.34769	0.899	0.692	1.02603e-137	4	Slc25a13
4.2104e-139	0.473495	0.982	0.907	8.4208e-136	4	Kazald1
9.71635e-138	0.377243	0.917	0.713	1.94327e-134	4	Ezh2
1.38914e-136	0.936885	0.846	0.615	2.77828e-133	4	Inhbb
1.38916e-135	0.356066	0.923	0.812	2.77833e-132	4	Arhgdig
2.41184e-135	-0.806256	0.997	0.992	4.82368e-132	4	Cst3
3.91093e-134	0.41057	0.987	0.909	7.82186e-131	4	Cndp2
3.39706e-132	0.348622	0.812	0.582	6.79412e-129	4	Topbp1
4.26291e-131	-0.860168	1	1	8.52583e-128	4	Malat1
7.11969e-131	0.257355	0.692	0.521	1.42394e-127	4	Tcf19
6.66572e-128	0.517352	0.909	0.77	1.33314e-124	4	Nap1l5
1.19498e-127	-0.957441	0.796	0.891	2.38995e-124	4	Thbs1
3.86461e-121	0.344247	0.993	0.937	7.72921e-118	4	Hjurp
4.09015e-121	0.522904	0.811	0.582	8.18031e-118	4	Inhba
1.31726e-116	0.316408	0.803	0.6	2.63453e-113	4	Brca2
2.76684e-115	0.320333	0.926	0.69	5.53368e-112	4	Fdxr
3.5348e-115	0.401005	0.998	0.962	7.06959e-112	4	Ucp2
9.5152e-115	0.396449	1	0.982	1.90304e-111	4	Serpine2
1.84532e-113	0.301858	0.704	0.532	3.69065e-110	4	Syce2
6.7582e-113	0.260282	0.795	0.621	1.35164e-109	4	Mybpc3
8.12822e-113	0.364766	0.96	0.859	1.62564e-109	4	Ptpre
1.48298e-111	0.469194	0.954	0.78	2.96595e-108	4	Fabp5
1.57588e-110	0.305558	0.651	0.414	3.15176e-107	4	Rrm2
1.84519e-110	0.494054	0.996	0.926	3.69038e-107	4	Ccnd2
3.24508e-110	0.294551	0.695	0.547	6.49017e-107	4	Brca1
1.06824e-109	0.281173	0.905	0.71	2.13647e-106	4	Lmnb1
1.44425e-109	0.272004	0.79	0.576	2.8885e-106	4	Hirip3
3.63816e-109	0.290013	1	0.984	7.27632e-106	4	Hmgb1
1.89261e-105	-1.10362	0.779	0.839	3.78523e-102	4	Sparc
1.98483e-104	0.31304	0.849	0.683	3.96966e-101	4	Thbs4
4.2762e-102	0.331463	0.998	0.973	8.55239e-99	4	Txnl1
1.1284e-101	0.314513	0.888	0.754	2.2568e-98	4	Rasl10a
3.4341e-101	0.348254	0.999	0.983	6.86821e-98	4	Cyb5a
3.81951e-101	-0.675116	0.52	0.703	7.63902e-98	4	Fhl1
4.82831e-101	-1.07941	0.806	0.865	9.65662e-98	4	Cfh
3.23716e-100	0.347718	0.877	0.706	6.47431e-97	4	Rgcc
6.37402e-98	-0.868336	0.95	0.96	1.2748e-94	4	Tpm1
9.73783e-98	-0.468338	0.997	0.991	1.94757e-94	4	Myl6
1.03171e-96	0.305518	0.942	0.725	2.06342e-93	4	Hmgn2
2.56575e-94	0.384313	0.978	0.9	5.1315e-91	4	Arhgap28
1.04168e-93	0.272996	0.638	0.435	2.08336e-90	4	Atad5
2.33805e-92	0.287352	0.621	0.417	4.6761e-89	4	Exo1
2.70837e-92	0.384525	0.971	0.894	5.41674e-89	4	Apoa4
2.91048e-92	0.345615	0.967	0.841	5.82095e-89	4	Odc1
1.88364e-91	-0.918658	0.699	0.79	3.76727e-88	4	Vim
2.77752e-91	-0.475827	0.567	0.722	5.55503e-88	4	Bmp2
6.24992e-91	-0.746325	0.8	0.872	1.24998e-87	4	Pik3ip1
8.25314e-90	0.362964	0.986	0.876	1.65063e-86	4	Fst
3.47027e-89	0.413103	0.997	0.977	6.94055e-86	4	Rgs2
1.14392e-84	0.332429	1	0.994	2.28784e-81	4	Map1b
1.41726e-84	-0.404462	0.997	0.983	2.83453e-81	4	Ldhb
1.08552e-81	-0.435366	0.576	0.742	2.17103e-78	4	Kcnk2
1.30171e-78	-0.974862	0.959	0.964	2.60343e-75	4	Cited2
1.41035e-78	-0.672691	0.931	0.936	2.82069e-75	4	Pik3r1
4.2729e-76	0.4354	0.988	0.908	8.5458e-73	4	Kcnq1ot1
5.76759e-74	-0.810468	0.926	0.914	1.15352e-70	4	Sdc4
5.55382e-73	0.313839	0.997	0.929	1.11076e-69	4	Socs2
1.56912e-72	-0.515437	0.895	0.901	3.13824e-69	4	Flna
2.59072e-72	0.264841	0.782	0.584	5.18144e-69	4	Fdps
1.10419e-71	-0.895269	0.547	0.679	2.20838e-68	4	Tuba1a
5.50902e-68	0.275634	0.981	0.925	1.1018e-64	4	Derl3
4.0911e-67	0.297468	0.998	0.958	8.1822e-64	4	Bex4
5.24376e-67	-0.936567	0.838	0.904	1.04875e-63	4	Itih5
1.26844e-66	-0.568115	0.76	0.826	2.53688e-63	4	Wt1
4.12112e-65	-0.860285	0.926	0.941	8.24223e-62	4	Prss23
1.53003e-63	0.27144	0.64	0.448	3.06006e-60	4	Fgfbp3
9.98487e-60	0.317712	0.913	0.766	1.99697e-56	4	Cnmd
1.19515e-59	0.25211	0.931	0.81	2.3903e-56	4	Nexmif
4.01957e-59	0.268599	0.877	0.76	8.03913e-56	4	Mycl
2.52446e-58	0.2829	0.985	0.862	5.04891e-55	4	Scd2
3.11474e-58	-0.314112	0.715	0.558	6.22949e-55	4	Ccnb1
6.10048e-58	0.274056	0.589	0.479	1.2201e-54	4	Slfn9
6.94887e-57	0.304327	0.794	0.621	1.38977e-53	4	Defb19
1.03499e-55	-1.09239	0.796	0.869	2.06999e-52	4	Gpx3
1.11489e-54	0.263246	0.776	0.641	2.22979e-51	4	Ihh
1.161e-52	-0.589415	0.641	0.74	2.32199e-49	4	Ddit4l
1.13816e-51	0.418691	0.798	0.653	2.27631e-48	4	Nnat
2.86306e-51	-0.387113	0.477	0.6	5.72612e-48	4	Myl9
4.91415e-51	-0.466767	0.607	0.699	9.82829e-48	4	Selenop
2.5988e-50	-0.516162	0.578	0.668	5.1976e-47	4	Tagln
3.71088e-47	0.270655	0.875	0.73	7.42176e-44	4	Mid1ip1
3.53623e-43	-0.25077	0.536	0.63	7.07246e-40	4	Filip1l
5.86252e-43	-0.343179	0.564	0.653	1.1725e-39	4	Col4a1
6.53206e-43	-0.747224	0.503	0.605	1.30641e-39	4	Col18a1
5.04371e-41	-0.304854	0.528	0.65	1.00874e-37	4	Cdc42ep3
6.07949e-41	-0.652569	0.932	0.944	1.2159e-37	4	Klf6
3.11902e-40	-0.472022	0.644	0.699	6.23803e-37	4	Tacc1
8.9842e-40	-0.698129	0.902	0.904	1.79684e-36	4	Ier3
7.29241e-39	-0.424047	0.964	0.942	1.45848e-35	4	Soat1
1.13592e-38	-0.664192	0.564	0.648	2.27183e-35	4	Fbn2
1.00794e-37	-0.744158	0.706	0.788	2.01588e-34	4	Rarres2
4.13448e-37	-0.580716	0.882	0.892	8.26896e-34	4	Mmp11
1.56804e-36	-0.58847	0.894	0.857	3.13608e-33	4	Arl6ip1
2.17421e-36	-0.261764	0.646	0.491	4.34841e-33	4	Cdc20
3.53509e-34	-0.362188	0.327	0.438	7.07018e-31	4	Mical2
6.14165e-34	-0.497246	0.563	0.629	1.22833e-30	4	Fbxo21
8.97146e-34	-0.379492	0.714	0.596	1.79429e-30	4	Prc1
1.6905e-33	-0.469588	0.513	0.618	3.381e-30	4	Ghr
3.3083e-33	-0.485969	0.724	0.75	6.61661e-30	4	Crip2
2.054e-32	-0.49495	0.769	0.71	4.10801e-29	4	Mki67
8.41567e-32	-0.352787	0.787	0.808	1.68313e-28	4	Slc40a1
1.07144e-31	-0.354199	0.751	0.666	2.14288e-28	4	Birc5
7.68242e-31	-0.439862	0.418	0.513	1.53648e-27	4	Wnt6
1.14229e-30	-0.459729	0.527	0.597	2.28457e-27	4	Cited4
1.22671e-30	-0.893591	0.613	0.645	2.45341e-27	4	AC167229.1
2.72367e-30	-0.260433	0.534	0.608	5.44734e-27	4	Hist1h1c
5.54133e-30	-0.641717	0.742	0.797	1.10827e-26	4	Col11a1
4.84158e-29	-0.558107	0.941	0.922	9.68316e-26	4	Junb
1.16705e-28	-0.413767	0.556	0.616	2.33411e-25	4	Sorbs2
1.45932e-28	-0.820107	0.699	0.683	2.91865e-25	4	Itga6
5.54064e-28	-0.423983	0.599	0.659	1.10813e-24	4	Timp3
1.39557e-27	-0.307758	0.42	0.538	2.79114e-24	4	Ifitm1
2.26359e-27	-0.415875	0.767	0.767	4.52719e-24	4	Mylk
1.54236e-25	-0.367667	0.999	0.99	3.08473e-22	4	Chchd10
1.73555e-25	-0.540432	0.362	0.461	3.4711e-22	4	Igfbp5
1.03918e-24	-0.40186	0.835	0.855	2.07835e-21	4	Pim1
5.3563e-24	-0.341186	0.786	0.798	1.07126e-20	4	Tnfrsf12a
2.85668e-23	-0.381811	0.677	0.634	5.71337e-20	4	Tpx2
3.61542e-22	-0.392592	0.823	0.836	7.23085e-19	4	Foxp2
2.33561e-21	-0.419627	0.7	0.722	4.67123e-18	4	Hspb1
2.71111e-20	-0.523646	0.433	0.496	5.42222e-17	4	Gatm
5.09538e-19	-0.349958	0.999	0.996	1.01908e-15	4	Gm42418
9.37096e-18	-0.353502	0.774	0.805	1.87419e-14	4	Arrdc3
3.53862e-17	-0.354896	0.617	0.646	7.07724e-14	4	Phlda1
3.61997e-17	-0.4133	0.803	0.819	7.23994e-14	4	Cyr61
6.02157e-17	-0.560936	0.787	0.733	1.20431e-13	4	Gas6
7.65638e-17	-0.402796	0.82	0.829	1.53128e-13	4	Crim1
9.20001e-17	-0.263841	0.662	0.688	1.84e-13	4	Lpp
5.3302e-16	-0.259728	0.644	0.686	1.06604e-12	4	Errfi1
1.54457e-15	-0.4633	0.68	0.73	3.08913e-12	4	Ctgf
2.75896e-15	-0.617639	0.639	0.651	5.51791e-12	4	Acta2
7.15573e-15	-0.252119	0.613	0.679	1.43115e-11	4	Cyp1b1
2.44796e-14	-0.710308	0.707	0.683	4.89592e-11	4	Wnt4
1.43741e-13	-0.297876	0.655	0.588	2.87483e-10	4	Cenpe
7.30369e-13	-0.290752	0.941	0.922	1.46074e-09	4	Txnip
5.10903e-12	-0.50677	0.926	0.893	1.02181e-08	4	Maged2
6.49788e-12	-0.260912	0.917	0.86	1.29958e-08	4	Gm26917
1.47111e-11	-0.286096	0.996	0.986	2.94222e-08	4	Ivns1abp
2.69258e-11	-0.388829	0.668	0.689	5.38516e-08	4	Id1
5.24159e-11	-0.64067	0.926	0.851	1.04832e-07	4	Gstm2
7.33645e-11	-0.276249	0.473	0.513	1.46729e-07	4	Pcp4l1
1.07748e-09	-0.310064	0.483	0.516	2.15495e-06	4	Aldh1a1
2.06439e-09	-0.293827	0.752	0.752	4.12879e-06	4	Gadd45a
2.10954e-09	-0.451021	0.878	0.878	4.21908e-06	4	Gadd45b
1.96862e-08	-0.313491	0.478	0.526	3.93723e-05	4	Rasl11a
3.78893e-08	-0.342451	0.624	0.613	7.57785e-05	4	Kitl
5.52798e-08	-0.634481	0.741	0.692	0.00011056	4	Cenpf
2.18557e-07	-0.292761	0.476	0.497	0.000437113	4	Rasd1
3.15083e-07	-0.254793	0.435	0.485	0.000630166	4	Socs3
3.17314e-07	-0.399753	0.776	0.746	0.000634627	4	Rasgef1b
4.72425e-07	-0.348855	0.606	0.583	0.00094485	4	Ank2
1.52444e-06	-0.335524	0.686	0.685	0.00304888	4	Id2
1.87975e-06	-0.358359	0.58	0.641	0.0037595	4	Hmmr
3.07373e-06	-0.706143	0.717	0.685	0.00614747	4	Ube2c
5.57027e-06	-0.268772	0.616	0.622	0.0111405	4	Gem
9.34939e-06	-0.642311	0.955	0.939	0.0186988	4	Grb14
0.000155906	-0.416687	0.793	0.748	0.311811	4	Gadd45g
0.000301693	-0.484074	0.787	0.782	0.603386	4	Mgp
0.000382204	-0.255816	0.554	0.448	0.764408	4	Gm37350
0.000745263	-0.28337	0.79	0.79	1	4	Serpinb6b
0.00155942	-0.268221	0.846	0.815	1	4	Itm2a
0	2.5651	0.994	0.666	0	5	Ube2c
0	2.44376	0.998	0.674	0	5	Cenpf
0	2.33653	0.994	0.655	0	5	Top2a
0	2.09739	0.994	0.578	0	5	Prc1
0	2.01007	0.994	0.695	0	5	Mki67
0	1.92302	0.996	0.612	0	5	Tpx2
0	1.84652	0.999	0.766	0	5	Hmgb2
0	1.81169	0.991	0.565	0	5	Cenpe
0	1.79816	0.999	0.655	0	5	Smc4
0	1.77132	0.999	0.576	0	5	Cdca8
0	1.72408	0.994	0.65	0	5	Birc5
0	1.6973	0.977	0.541	0	5	Ccnb1
0	1.67682	0.995	0.85	0	5	Arl6ip1
0	1.65959	0.989	0.591	0	5	Cenpa
0	1.64917	0.999	0.914	0	5	Tubb4b
0	1.64461	0.981	0.611	0	5	Hmmr
0	1.64105	0.983	0.469	0	5	Cdc20
0	1.62417	0.985	0.495	0	5	Nusap1
0	1.54057	0.993	0.577	0	5	Cks2
0	1.47276	0.988	0.673	0	5	Ccnb2
0	1.44724	0.989	0.603	0	5	Incenp
0	1.44577	0.998	0.943	0	5	Ube2s
0	1.43213	0.987	0.591	0	5	Racgap1
0	1.39097	0.966	0.625	0	5	H2afx
0	1.37092	0.998	0.967	0	5	Tuba1b
0	1.34107	1	0.989	0	5	H2afz
0	1.24578	0.975	0.605	0	5	Cdca3
0	1.23917	0.948	0.512	0	5	Aspm
0	1.22175	0.955	0.41	0	5	Cdk1
0	1.2195	1	0.992	0	5	Tubb5
0	1.21443	0.989	0.575	0	5	Smc2
0	1.1889	0.972	0.614	0	5	Knl1
0	1.18754	1	0.973	0	5	Stmn1
0	1.154	0.949	0.472	0	5	Kif11
0	1.14368	0.959	0.499	0	5	Kif23
0	1.13124	1	0.872	0	5	Nucks1
0	1.1302	0.947	0.491	0	5	Mis18bp1
0	1.12274	0.963	0.46	0	5	Kif20b
0	1.12183	0.985	0.737	0	5	H1fx
0	1.1193	0.951	0.64	0	5	Tuba1c
0	1.11093	0.956	0.517	0	5	Ccna2
0	1.09848	0.968	0.645	0	5	Spc24
0	1.08412	0.96	0.489	0	5	Kif22
0	1.07902	0.99	0.707	0	5	Lmnb1
0	1.07242	0.998	0.922	0	5	Jpt1
0	1.061	0.955	0.54	0	5	Tacc3
0	1.04495	0.951	0.569	0	5	Ckap2l
0	1.02791	0.935	0.564	0	5	Kif2c
0	1.02207	0.942	0.517	0	5	Sgo2a
0	1.01469	0.938	0.575	0	5	Knstrn
0	1.01198	0.987	0.708	0	5	Rad21
0	0.992477	0.939	0.57	0	5	Bub1b
0	0.991911	0.913	0.455	0	5	Plk1
0	0.980932	0.953	0.545	0	5	G2e3
0	0.977826	0.935	0.483	0	5	Kif4
0	0.971643	0.998	0.938	0	5	Hjurp
0	0.947201	0.934	0.581	0	5	Gas2l3
0	0.946473	0.925	0.53	0	5	Spc25
0	0.93609	0.903	0.551	0	5	Pbk
0	0.930966	1	0.985	0	5	Hmgb1
0	0.928026	0.957	0.598	0	5	Dbf4
0	0.912571	0.91	0.588	0	5	Cdkn3
0	0.900193	0.978	0.692	0	5	Ccdc34
0	0.880992	0.966	0.635	0	5	Ckap5
0	0.867237	0.985	0.782	0	5	Rangap1
0	0.864259	0.872	0.448	0	5	Aurka
0	0.860869	0.987	0.783	0	5	Cks1b
0	0.854698	0.994	0.827	0	5	Selenoh
0	0.850609	0.986	0.792	0	5	Tmpo
0	0.848663	0.91	0.564	0	5	Bub1
0	0.83691	0.886	0.433	0	5	Anln
0	0.824758	0.904	0.472	0	5	Sgo1
0	0.819833	0.91	0.535	0	5	Kif15
0	0.816219	0.894	0.515	0	5	Cdca2
0	0.798074	0.892	0.419	0	5	Ncapg
0	0.787726	0.999	0.956	0	5	Ran
0	0.786327	0.859	0.475	0	5	Ckap2
0	0.768512	0.868	0.452	0	5	Dlgap5
0	0.751464	0.976	0.726	0	5	Hmgn2
0	0.742093	0.89	0.531	0	5	Lockd
0	0.727304	0.929	0.553	0	5	Cenpp
0	0.714714	0.87	0.501	0	5	Ndc80
0	0.6968	0.9	0.531	0	5	Cit
0	0.696356	0.864	0.44	0	5	Ect2
0	0.690492	0.909	0.614	0	5	Diaph3
0	0.688864	0.929	0.615	0	5	Pclaf
0	0.683353	0.873	0.494	0	5	Arhgap11a
0	0.67903	0.902	0.444	0	5	Ncapd2
0	0.670582	0.861	0.574	0	5	Esco2
0	0.651733	0.858	0.415	0	5	Kif20a
0	0.643023	0.834	0.396	0	5	Aurkb
0	0.620136	0.865	0.448	0	5	Ncaph
0	0.590883	0.905	0.537	0	5	Cenpw
0	0.576766	0.789	0.491	0	5	Pimreg
0	0.528287	0.831	0.482	0	5	Shcbp1
0	0.524629	0.786	0.321	0	5	Cep55
0	0.51412	0.822	0.482	0	5	Psrc1
0	0.508402	0.797	0.507	0	5	Nuf2
0	0.491166	0.812	0.427	0	5	Neil3
0	0.490241	0.81	0.54	0	5	Kifc1
0	0.458853	0.771	0.413	0	5	Ccnf
0	0.442649	0.746	0.353	0	5	Nek2
0	0.428444	0.802	0.466	0	5	Cdca5
0	0.396471	0.772	0.404	0	5	Kif14
9.14972e-308	0.519785	0.791	0.543	1.82994e-304	5	Cdc25c
1.91542e-306	0.529022	0.796	0.486	3.83084e-303	5	Melk
8.18523e-306	0.515712	0.799	0.486	1.63705e-302	5	Kif18a
1.40563e-305	0.528586	0.796	0.471	2.81127e-302	5	Spdl1
2.15635e-305	0.605938	0.907	0.639	4.31269e-302	5	Cenpm
4.32391e-301	0.490607	0.759	0.396	8.64782e-298	5	Depdc1a
1.84457e-296	0.569427	0.833	0.403	3.68913e-293	5	Trim59
8.76163e-291	0.70736	0.963	0.712	1.75233e-287	5	Ezh2
4.75874e-283	0.525725	0.835	0.511	9.51749e-280	5	Plk4
6.91554e-280	0.635566	0.879	0.621	1.38311e-276	5	Cep89
8.82449e-279	0.492642	0.788	0.529	1.7649e-275	5	Spag5
1.08843e-278	0.569175	0.804	0.438	2.17686e-275	5	Fbxo5
1.40683e-278	0.495125	0.803	0.423	2.81367e-275	5	Mad2l1
7.55823e-272	0.486204	0.77	0.486	1.51165e-268	5	C330027C09Rik
1.1354e-264	0.380836	0.796	0.461	2.27081e-261	5	Cenpn
3.4556e-264	0.536989	0.908	0.595	6.91121e-261	5	Gmnn
7.70187e-248	0.653728	0.967	0.807	1.54037e-244	5	Nt5dc2
9.10326e-244	0.534633	0.94	0.649	1.82065e-240	5	Atad2
1.14807e-243	0.66508	0.994	0.899	2.29614e-240	5	Dek
5.15661e-241	0.527885	0.882	0.572	1.03132e-237	5	Hirip3
1.23209e-239	0.491587	0.719	0.375	2.46417e-236	5	Kpna2
2.13047e-237	0.579106	0.919	0.669	4.26093e-234	5	Rrm1
3.53793e-234	0.516815	0.845	0.49	7.07585e-231	5	Mns1
5.26974e-231	0.360827	0.718	0.492	1.05395e-227	5	Sapcd2
6.40438e-230	0.496948	0.901	0.64	1.28088e-226	5	Rfc4
7.6712e-226	0.340649	0.784	0.471	1.53424e-222	5	Smtn
2.16595e-223	0.40882	0.726	0.475	4.3319e-220	5	Ska1
4.17277e-220	0.414801	0.708	0.36	8.34554e-217	5	Ttk
2.63277e-218	0.301061	0.697	0.434	5.26554e-215	5	Iqgap3
1.6478e-213	0.310306	0.785	0.542	3.29559e-210	5	Brca1
5.79414e-206	0.366319	0.767	0.509	1.15883e-202	5	Rad51ap1
1.98628e-205	0.522661	0.898	0.626	3.97255e-202	5	Ddx39
3.68529e-190	0.433939	0.88	0.597	7.37057e-187	5	Brca2
9.3443e-186	0.784903	0.903	0.749	1.86886e-182	5	Slc38a5
1.82491e-184	0.380452	0.919	0.645	3.64982e-181	5	Rpa2
2.50873e-184	0.280793	0.719	0.513	5.01747e-181	5	Aunip
5.38489e-181	0.343428	0.749	0.491	1.07698e-177	5	Cenph
7.48751e-180	0.971174	0.827	0.555	1.4975e-176	5	Hist1h1b
1.88856e-176	0.425191	0.856	0.581	3.77711e-173	5	Tyms
4.43841e-166	0.414554	0.872	0.673	8.87683e-163	5	Dnph1
3.87751e-163	0.441138	0.927	0.661	7.75501e-160	5	Usp1
5.49788e-163	0.322062	0.834	0.561	1.09958e-159	5	Dtl
5.19168e-162	0.490532	0.727	0.454	1.03834e-158	5	Hist1h4d
2.8518e-160	0.751366	0.733	0.5	5.70361e-157	5	Hist1h2ae
4.40443e-159	0.316268	0.731	0.456	8.80886e-156	5	Cenpk
6.37165e-158	0.489316	1	0.993	1.27433e-154	5	Hsp90b1
5.44972e-144	0.338773	0.853	0.582	1.08994e-140	5	Topbp1
1.47821e-140	0.436588	0.979	0.781	2.95641e-137	5	Nasp
1.70388e-139	0.297458	0.81	0.559	3.40776e-136	5	Ncapd3
3.31259e-135	0.361237	0.891	0.638	6.62519e-132	5	Dnajc9
1.04603e-134	0.464087	0.989	0.896	2.09206e-131	5	Fbln1
2.77271e-133	0.286077	0.753	0.589	5.54543e-130	5	Clspn
3.74657e-132	0.366879	0.839	0.649	7.49315e-129	5	Tmem97
3.05431e-130	0.539398	0.999	0.986	6.10863e-127	5	Gja1
2.54663e-120	0.318262	0.651	0.517	5.09326e-117	5	Hist1h3c
2.68709e-120	0.422748	0.823	0.643	5.37418e-117	5	Fam81a
1.57687e-118	0.25854	0.951	0.772	3.15374e-115	5	Lig1
1.65851e-117	0.41677	0.993	0.935	3.31702e-114	5	Ranbp1
4.50029e-112	0.291187	0.955	0.728	9.00057e-109	5	Mcm7
2.63373e-111	0.558746	0.987	0.877	5.26746e-108	5	Fst
2.32866e-110	0.400129	0.923	0.821	4.65733e-107	5	Evc2
5.38996e-110	0.336885	0.88	0.696	1.07799e-106	5	Slc25a13
1.95673e-108	0.331177	0.839	0.742	3.91346e-105	5	Dnajb13
1.714e-104	0.462444	0.633	0.406	3.42801e-101	5	Hist1h2ap
2.24731e-104	0.388015	0.942	0.76	4.49461e-101	5	Dut
9.00859e-102	0.38943	0.999	0.973	1.80172e-98	5	Txnl1
1.04551e-101	0.363455	0.947	0.793	2.09103e-98	5	Zfp277
4.5855e-101	0.572141	0.862	0.775	9.17099e-98	5	Nap1l5
3.52588e-95	0.388971	0.994	0.949	7.05175e-92	5	Psma2
5.81009e-95	0.373468	0.642	0.435	1.16202e-91	5	Hist1h1e
1.53544e-93	0.263525	0.651	0.417	3.07089e-90	5	Rrm2
3.11616e-92	0.286418	0.839	0.686	6.23232e-89	5	Thbs4
4.81568e-92	0.30272	0.602	0.475	9.63135e-89	5	Mxd3
1.25592e-84	0.375553	0.99	0.929	2.51183e-81	5	Tpi1
6.08953e-84	0.438724	1	0.998	1.21791e-80	5	Inha
3.34788e-81	0.4022	1	0.983	6.69577e-78	5	Cyb5a
1.88261e-80	0.313792	0.976	0.91	3.76522e-77	5	Cndp2
1.01709e-79	0.318419	0.991	0.954	2.03418e-76	5	Csrp2
1.1659e-78	0.408396	0.992	0.974	2.3318e-75	5	Htra1
1.18384e-78	0.334356	0.853	0.71	2.36767e-75	5	Rgcc
1.31868e-78	0.291839	0.915	0.778	2.63737e-75	5	Tox2
2.731e-76	0.310304	0.912	0.743	5.46201e-73	5	Ppa1
3.45218e-76	0.315987	0.958	0.806	6.90435e-73	5	Rnf19b
1.53199e-75	0.343427	0.967	0.848	3.06399e-72	5	Pgk1
5.53371e-71	0.284309	0.932	0.759	1.10674e-67	5	Lpl
6.9669e-70	0.270079	0.953	0.841	1.39338e-66	5	Dctpp1
2.96967e-69	0.290331	0.976	0.912	5.93935e-66	5	Igf1
7.04405e-66	0.299048	0.989	0.924	1.40881e-62	5	Carhsp1
3.47571e-65	0.257808	0.906	0.769	6.95141e-62	5	Ubash3b
1.08234e-63	0.274583	0.969	0.895	2.16469e-60	5	Apoa4
7.78285e-60	0.308728	0.95	0.782	1.55657e-56	5	Fabp5
1.9838e-59	0.266398	1	0.993	3.96759e-56	5	Mif
4.45933e-59	0.822261	0.732	0.626	8.91866e-56	5	Inhbb
3.6978e-58	0.250201	0.835	0.673	7.3956e-55	5	Car14
1.19209e-56	0.280513	0.976	0.926	2.38418e-53	5	Derl3
1.41354e-56	-0.427232	0.594	0.701	2.82708e-53	5	Pla2g1b
1.46452e-56	0.323839	0.884	0.739	2.92904e-53	5	Hsd17b1
4.07368e-55	0.292104	0.953	0.859	8.14735e-52	5	Eno1
7.94404e-54	-0.384664	0.324	0.546	1.58881e-50	5	Shtn1
1.23674e-52	0.288541	0.99	0.96	2.47348e-49	5	Foxo1
7.68416e-51	-0.311679	0.419	0.6	1.53683e-47	5	Ung
4.34495e-46	-0.31022	0.998	0.983	8.68991e-43	5	Ldhb
4.7994e-46	0.263689	0.859	0.73	9.5988e-43	5	Trib2
1.20261e-45	0.286091	0.998	0.994	2.40522e-42	5	Map1b
2.88796e-45	0.257491	0.997	0.978	5.77592e-42	5	Hspd1
1.6818e-44	0.254646	0.996	0.958	3.3636e-41	5	Bex4
4.09349e-43	0.444105	0.68	0.595	8.18697e-40	5	Inhba
7.99288e-37	-0.289221	0.487	0.637	1.59858e-33	5	Plxna2
1.49271e-29	-0.360918	0.75	0.822	2.98543e-26	5	Atp1b1
2.79933e-29	-0.322333	0.53	0.654	5.59866e-26	5	Col4a1
2.73503e-27	-0.302201	0.449	0.571	5.47007e-24	5	Espn
1.40551e-24	-0.434546	0.607	0.694	2.81103e-21	5	Fhl1
2.43169e-23	-0.356845	0.97	0.944	4.86337e-20	5	Amhr2
4.86146e-23	-0.271991	0.998	0.99	9.72291e-20	5	Chchd10
8.60863e-23	-0.386127	0.831	0.855	1.72173e-19	5	Pim1
1.64948e-21	-0.315336	0.531	0.629	3.29896e-18	5	Fabp3
1.43567e-19	-0.331459	0.977	0.946	2.87134e-16	5	Isyna1
9.69227e-18	-0.392906	0.754	0.789	1.93845e-14	5	Serpinf1
1.74364e-17	-0.439617	0.973	0.958	3.48727e-14	5	Tpm1
1.53038e-15	-0.42451	0.841	0.868	3.06076e-12	5	Pik3ip1
3.6257e-15	-0.413078	0.601	0.626	7.2514e-12	5	Fbxo21
6.71877e-15	-0.404276	0.526	0.616	1.34375e-11	5	Ghr
1.32461e-13	-0.368066	0.411	0.513	2.64922e-10	5	Wnt6
2.31226e-13	-0.28607	0.976	0.941	4.62451e-10	5	Soat1
2.42945e-12	-0.363271	0.965	0.934	4.85891e-09	5	Pik3r1
1.06998e-10	-0.295349	0.456	0.534	2.13997e-07	5	Ifitm1
1.70396e-10	-0.390052	0.529	0.596	3.40793e-07	5	Cited4
5.74895e-10	-0.376253	0.77	0.784	1.14979e-06	5	Vim
1.92643e-09	-0.371488	0.727	0.692	3.85285e-06	5	Tacc1
2.38368e-09	-0.300817	0.873	0.851	4.76736e-06	5	Metrnl
7.97668e-09	-0.281641	0.385	0.488	1.59534e-05	5	Socs3
2.39098e-08	-0.376474	0.891	0.891	4.78197e-05	5	Mmp11
3.86563e-08	-0.330432	0.363	0.434	7.73126e-05	5	Mical2
4.15742e-08	-0.303156	0.998	0.992	8.31484e-05	5	Cst3
8.8749e-08	-0.304099	0.554	0.587	0.000177498	5	Ank2
4.23264e-07	-0.341254	0.562	0.596	0.000846527	5	Pcsk6
4.48587e-07	-0.330875	0.639	0.644	0.000897175	5	Phlda1
3.23445e-06	-0.308098	0.573	0.592	0.00646889	5	Myl9
4.16794e-06	-0.276389	0.822	0.816	0.00833589	5	Tmem184a
7.88686e-06	-0.309283	0.687	0.692	0.0157737	5	Selenop
1.62358e-05	-0.297139	0.672	0.723	0.0324716	5	Hspb1
0.000127873	-0.365784	0.83	0.782	0.255745	5	Wfdc10
0.000268736	-0.283726	0.474	0.516	0.537471	5	Aldh1a1
0.000351122	-0.413132	0.654	0.641	0.702244	5	Fbn2
0.00268622	-0.309811	0.601	0.612	1	5	Sorbs2
0.00307287	-0.387911	0.793	0.783	1	5	Atf3
0	2.29512	0.995	0.839	0	6	Cald1
0	1.99656	0.953	0.782	0	6	Col11a1
0	1.8792	0.943	0.622	0	6	Fbn2
0	1.85068	0.959	0.671	0	6	Fhl1
0	1.76924	0.95	0.588	0	6	Ghr
0	1.73257	0.981	0.893	0	6	Itih5
0	1.57802	0.992	0.852	0	6	Cfh
0	1.54101	0.938	0.651	0	6	Tuba1a
0	1.53472	0.962	0.771	0	6	Vim
0	1.51804	0.967	0.86	0	6	Pik3ip1
0	1.50528	0.997	0.936	0	6	Prss23
0	1.42733	0.992	0.937	0	6	Grb14
0	1.36994	0.999	0.994	0	6	Sox4
0	1.36338	0.995	0.962	0	6	Cited2
0	1.29795	0.996	0.956	0	6	Tpm1
0	1.28006	0.999	0.992	0	6	Cst3
0	1.2688	0.899	0.718	0	6	Kcnk2
0	1.17099	0.953	0.82	0	6	Crim1
4.37076e-303	1.36988	0.98	0.877	8.74152e-300	6	Thbs1
1.67694e-285	1.0637	0.784	0.617	3.35388e-282	6	Gm15866
2.37328e-273	1.04726	0.916	0.818	4.74655e-270	6	Ehd4
4.67517e-273	1.41799	0.908	0.822	9.35033e-270	6	Mef2c
1.37395e-272	0.989315	0.996	0.96	2.74791e-269	6	Foxo1
5.6323e-266	0.736464	0.999	0.991	1.12646e-262	6	Myl6
7.24447e-262	1.24058	0.851	0.681	1.44889e-258	6	Selenop
9.77845e-251	0.827901	0.996	0.986	1.95569e-247	6	Ivns1abp
4.61602e-240	1.08566	0.837	0.701	9.23205e-237	6	Bmp2
2.33824e-235	0.836231	0.96	0.897	4.67649e-232	6	Flna
8.20407e-235	0.688477	1	0.997	1.64081e-231	6	Ctsl
3.9998e-224	1.06613	0.968	0.887	7.99961e-221	6	Tdrd5
2.97931e-220	1.34049	0.893	0.715	5.95862e-217	6	Ctgf
2.67074e-211	1.00147	0.705	0.478	5.34148e-208	6	Neto2
2.32077e-201	0.803704	0.968	0.898	4.64154e-198	6	Ank3
1.27266e-198	0.897653	0.989	0.954	2.54533e-195	6	Csrp2
5.72352e-191	0.900435	0.89	0.832	1.1447e-187	6	Foxp2
7.14096e-191	0.879662	0.876	0.813	1.42819e-187	6	Itm2a
1.35428e-187	1.29765	0.72	0.547	2.70856e-184	6	Adamts5
2.0247e-163	0.680528	0.63	0.405	4.04941e-160	6	Ptprz1
4.56023e-157	0.839408	0.743	0.698	9.12046e-154	6	Fgd5
6.2021e-155	1.01462	0.965	0.941	1.24042e-151	6	Klf6
2.05482e-153	0.935274	0.892	0.73	4.10965e-150	6	Tmsb4x
2.61525e-153	0.941985	0.969	0.934	5.23049e-150	6	Pik3r1
6.52858e-150	0.70697	0.86	0.777	1.30572e-146	6	Ext1
3.13889e-147	-0.304471	0.296	0.657	6.27777e-144	6	Mybpc3
3.38747e-141	0.69575	0.834	0.687	6.77494e-138	6	Akr1c14
9.18707e-141	-0.40297	0.484	0.766	1.83741e-137	6	Dnajb13
2.10654e-139	-0.470213	0.335	0.688	4.21308e-136	6	Spc24
1.68732e-135	-0.397024	0.31	0.685	3.37464e-132	6	Tmem97
6.09426e-132	-0.280303	0.234	0.619	1.21885e-128	6	Bub1b
5.56712e-131	0.93596	0.718	0.616	1.11342e-127	6	Filip1l
7.91447e-126	-0.27255	0.417	0.706	1.58289e-122	6	Heyl
1.5805e-119	0.534136	0.623	0.492	3.16099e-116	6	Tubb2b
1.76361e-119	0.499737	0.713	0.618	3.52722e-116	6	Ccdc80
3.04613e-119	0.635643	0.817	0.716	6.09225e-116	6	Uchl1
1.48378e-117	-0.292757	0.2	0.646	2.96756e-114	6	Slc38a3
1.87513e-117	-0.419902	0.214	0.625	3.75025e-114	6	Tyms
7.98933e-115	-0.422714	0.517	0.797	1.59787e-111	6	Cotl1
9.14801e-113	-0.274654	0.351	0.652	1.8296e-109	6	Diaph3
2.34327e-112	0.708862	0.656	0.617	4.68654e-109	6	Lox
3.28554e-111	-0.402351	0.249	0.645	6.57107e-108	6	Dnmt1
1.41058e-108	0.661794	0.89	0.855	2.82115e-105	6	Tes
7.07395e-106	-0.460553	0.369	0.713	1.41479e-102	6	Creld2
1.13539e-103	-0.387799	0.356	0.648	2.27078e-100	6	Cdca3
6.12297e-103	0.607419	0.722	0.576	1.22459e-99	6	Ank2
3.34321e-102	-0.380949	0.557	0.813	6.68642e-99	6	Ly6e
3.57063e-102	-0.362086	0.466	0.716	7.14125e-99	6	Ppfibp2
1.53653e-99	0.783788	0.826	0.726	3.07306e-96	6	Ddit4l
3.25002e-99	0.661742	0.866	0.792	6.50004e-96	6	Hpgd
2.01195e-96	-0.45292	0.377	0.67	4.0239e-93	6	Mcm5
2.14059e-96	0.558497	0.77	0.68	4.28117e-93	6	Lpp
1.01745e-94	0.60406	0.843	0.816	2.0349e-91	6	Serpinb1a
5.71689e-94	-0.397194	0.451	0.702	1.14338e-90	6	Dnph1
6.77672e-93	-0.292723	0.382	0.62	1.35534e-89	6	Stra6
5.65635e-92	0.64464	0.872	0.852	1.13127e-88	6	Pim1
9.43004e-92	-0.387531	0.33	0.656	1.88601e-88	6	Hmmr
4.84953e-91	-0.410247	0.31	0.663	9.69905e-88	6	Pdlim4
5.07266e-91	0.520272	0.893	0.891	1.01453e-87	6	Mmp11
5.49636e-91	0.635254	0.702	0.605	1.09927e-87	6	Sorbs2
3.12619e-90	0.514574	0.922	0.785	6.25239e-87	6	Fabp5
8.93612e-90	-0.383657	0.305	0.636	1.78722e-86	6	Gmnn
7.60115e-89	0.725026	0.806	0.789	1.52023e-85	6	Serpinb6b
2.05433e-87	0.583708	0.662	0.513	4.10867e-84	6	Rasl11a
1.02654e-85	-0.382142	0.419	0.763	2.05308e-82	6	Msmo1
9.96418e-84	-0.409141	0.547	0.803	1.99284e-80	6	Tox2
3.39882e-83	0.473267	0.599	0.565	6.79763e-80	6	Ndrg1
6.39278e-83	-0.275338	0.325	0.61	1.27856e-79	6	Cxcl10
8.25714e-83	-0.415641	0.381	0.679	1.65143e-79	6	Tuba1c
1.33096e-82	-0.318467	0.289	0.581	2.66191e-79	6	Hs6st2
2.64025e-82	0.489356	0.992	0.975	5.28049e-79	6	Ywhaq
7.99573e-82	0.542783	0.624	0.618	1.59915e-78	6	Prg4
4.40809e-81	-0.437558	0.361	0.634	8.81617e-78	6	Racgap1
3.61634e-80	0.629781	0.829	0.801	7.23267e-77	6	Arrdc3
4.09749e-80	-0.264792	0.565	0.838	8.19498e-77	6	Arhgdig
6.17796e-80	-0.404398	0.366	0.641	1.23559e-76	6	Mcm4
1.20733e-79	-0.359917	0.392	0.654	2.41467e-76	6	Knl1
2.03021e-79	-0.353195	0.424	0.725	4.06043e-76	6	Dusp5
1.57106e-77	-0.404064	0.387	0.681	3.14211e-74	6	Rpa2
1.50879e-76	-0.477452	0.369	0.673	3.01758e-73	6	Timp3
3.94645e-75	-0.453823	0.472	0.726	7.89289e-72	6	Phgdh
7.06754e-75	-0.283041	0.402	0.728	1.41351e-71	6	Slc25a13
2.48562e-74	-0.255313	0.211	0.562	4.97124e-71	6	Perp
1.55952e-72	-0.376388	0.543	0.784	3.11905e-69	6	Ano4
1.21646e-71	-0.445475	0.414	0.696	2.43291e-68	6	Usp1
3.31374e-71	-0.252576	0.333	0.61	6.62747e-68	6	Esco2
1.03873e-70	-0.471386	0.599	0.834	2.07746e-67	6	Nexmif
2.26239e-70	-0.399287	0.605	0.838	4.52479e-67	6	C1galt1
3.30595e-70	0.717364	0.651	0.639	6.61191e-67	6	Cdc42ep3
8.29225e-70	-0.42309	0.398	0.671	1.65845e-66	6	Dnajc9
9.98818e-70	-0.443293	0.576	0.806	1.99764e-66	6	Gprasp1
1.60761e-69	0.544175	0.593	0.512	3.21521e-66	6	Peg10
1.61466e-69	-0.340727	0.311	0.606	3.22931e-66	6	Ung
6.19538e-69	-0.301853	0.271	0.553	1.23908e-65	6	Cntn4
2.04222e-67	0.256573	0.523	0.495	4.08443e-64	6	Slc1a1
3.8619e-66	-0.361228	0.39	0.621	7.72379e-63	6	Uhrf1
3.67803e-65	-0.342587	0.299	0.644	7.35607e-62	6	Fabp3
5.42382e-65	-0.25591	0.322	0.618	1.08476e-61	6	Knstrn
1.95624e-64	-0.358013	0.146	0.534	3.91248e-61	6	Cyp2s1
2.34254e-62	-0.451439	0.377	0.659	4.68509e-59	6	Dsp
1.34144e-61	-0.339607	0.298	0.596	2.68289e-58	6	Dhfr
5.89325e-61	0.432224	0.807	0.77	1.17865e-57	6	Zfp385b
6.64232e-61	0.754305	0.623	0.641	1.32846e-57	6	Asb4
5.51466e-60	0.442302	0.812	0.777	1.10293e-56	6	Ddah1
8.53008e-60	-0.340008	0.338	0.668	1.70602e-56	6	Igfbp2
1.49946e-58	-0.427348	0.353	0.584	2.99891e-55	6	Ccnb1
1.23266e-56	-0.266589	0.253	0.587	2.46532e-53	6	Cbs
3.68224e-56	-0.309575	0.424	0.672	7.36447e-53	6	Rfc4
1.25343e-55	0.399638	0.788	0.755	2.50687e-52	6	Cyfip2
1.52785e-55	-0.316553	0.37	0.662	3.0557e-52	6	Ddx39
6.90874e-55	-0.44342	0.645	0.807	1.38175e-51	6	Cks1b
1.13338e-54	-0.335545	0.282	0.605	2.26675e-51	6	Scarb1
1.99186e-54	-0.398647	0.4	0.702	3.98371e-51	6	Car14
2.06002e-54	0.286579	0.501	0.474	4.12003e-51	6	Cd24a
3.01455e-54	-0.351693	0.451	0.701	6.02909e-51	6	Rrm1
4.61979e-54	-0.282191	0.616	0.867	9.23957e-51	6	Lmna
5.09678e-54	-0.452733	0.81	0.945	1.01936e-50	6	Mt1
7.953e-54	0.448518	0.58	0.553	1.5906e-50	6	Pdlim5
3.07278e-53	0.474891	0.704	0.724	6.14555e-50	6	Nexn
9.13126e-52	1.02032	0.657	0.65	1.82625e-48	6	Acta2
4.55238e-51	-0.324745	0.21	0.518	9.10477e-48	6	Gldn
5.24839e-51	-0.40023	0.369	0.576	1.04968e-47	6	Espn
1.32295e-50	0.405862	0.642	0.567	2.6459e-47	6	Nipal1
2.09585e-50	-0.299496	0.348	0.609	4.1917e-47	6	Hirip3
6.03576e-50	0.37948	0.81	0.815	1.20715e-46	6	Bmpr1b
9.66842e-50	-0.42208	0.531	0.742	1.93368e-46	6	Dnajb14
2.60349e-49	-0.358472	0.351	0.623	5.20697e-46	6	Adgrf5
1.90213e-48	-0.254052	0.241	0.558	3.80426e-45	6	Pcna
2.20807e-48	-0.377856	0.562	0.802	4.41614e-45	6	Lgals1
4.33963e-48	-0.319689	0.763	0.933	8.67925e-45	6	Fosb
4.82796e-48	-0.454826	0.736	0.864	9.65592e-45	6	Pgk1
2.76983e-47	0.482851	0.58	0.525	5.53966e-44	6	Hsd17b7
3.80207e-47	0.561744	0.838	0.817	7.60415e-44	6	Cyr61
1.25167e-46	-0.397026	0.531	0.794	2.50333e-43	6	Klf2
2.10681e-46	-0.27135	0.323	0.614	4.21363e-43	6	Tdrp
2.65299e-46	-0.269513	0.343	0.574	5.30597e-43	6	Kif15
2.70222e-46	-0.320901	0.466	0.67	5.40445e-43	6	Cenpm
3.29925e-46	-0.284763	0.593	0.796	6.59851e-43	6	Atf3
2.02984e-45	0.345478	0.868	0.849	4.05967e-42	6	Arhgef28
4.3723e-45	0.329305	0.739	0.738	8.7446e-42	6	Gyg
1.26328e-44	-0.348677	0.377	0.588	2.52655e-41	6	Pbk
1.28103e-44	0.516951	0.655	0.661	2.56207e-41	6	Tagln
2.09172e-44	-0.276917	0.344	0.562	4.18344e-41	6	Krt79
5.81128e-44	-0.28683	0.345	0.582	1.16226e-40	6	Tacc3
9.04429e-43	-0.274575	0.503	0.714	1.80886e-39	6	Fxyd6
2.94348e-42	-0.394404	0.69	0.857	5.88696e-39	6	Mdfic
3.06285e-42	0.520596	0.565	0.51	6.1257e-39	6	Aldh1a1
3.10453e-41	0.872005	0.762	0.783	6.20906e-38	6	Rarres2
3.96663e-41	-0.421606	0.824	0.911	7.93326e-38	6	Dek
6.85647e-41	-0.321455	0.959	0.976	1.37129e-37	6	Txnl1
7.56095e-41	-0.454138	0.526	0.766	1.51219e-37	6	Gadd45g
9.58468e-41	0.390608	0.761	0.747	1.91694e-37	6	Crip2
1.2584e-40	0.374751	0.86	0.876	2.51679e-37	6	Col9a2
1.31473e-40	-0.273843	0.212	0.507	2.62947e-37	6	Mcm2
1.77632e-40	-0.349578	0.818	0.921	3.55265e-37	6	Cndp2
4.71138e-40	-0.373024	0.277	0.529	9.42276e-37	6	Mns1
1.05773e-39	-0.426621	0.295	0.543	2.11546e-36	6	Nusap1
1.38185e-39	-0.268809	0.331	0.618	2.7637e-36	6	Fdps
1.98967e-39	-0.327446	0.743	0.855	3.97933e-36	6	Dctpp1
2.822e-39	-0.287791	0.276	0.536	5.64401e-36	6	Kif22
4.46088e-39	-0.395558	0.26	0.534	8.92175e-36	6	Spin2c
9.09512e-39	-0.265059	0.338	0.585	1.81902e-35	6	Peg3
1.48952e-38	-0.331647	0.738	0.858	2.97904e-35	6	Odc1
8.63839e-37	-0.273224	0.324	0.555	1.72768e-33	6	Aspm
2.23454e-36	0.27809	0.562	0.501	4.46908e-33	6	Arap2
6.65233e-35	-0.269928	0.22	0.524	1.33047e-31	6	Tipin
3.05803e-34	-0.462024	0.458	0.64	6.11605e-31	6	Incenp
3.7272e-34	-0.408018	0.588	0.752	7.45441e-31	6	Mid1ip1
1.20015e-33	-0.390438	0.656	0.807	2.4003e-30	6	Mcm6
3.99067e-33	-0.268644	0.349	0.57	7.98134e-30	6	Spc25
6.73619e-33	0.346756	0.539	0.552	1.34724e-29	6	Clec1a
1.02862e-32	-0.28015	0.626	0.817	2.05723e-29	6	Gata6
3.13326e-32	0.384603	0.913	0.924	6.26652e-29	6	Txnip
1.27947e-30	-0.250757	0.38	0.615	2.55894e-27	6	Topbp1
7.30239e-30	0.269367	0.856	0.853	1.46048e-26	6	Dock4
7.52964e-30	0.57367	0.765	0.845	1.50593e-26	6	Fam46a
5.66564e-29	0.401116	0.702	0.755	1.13313e-25	6	Gadd45a
6.93303e-29	-0.298834	0.251	0.494	1.38661e-25	6	Susd4
1.15032e-28	0.280074	0.48	0.467	2.30065e-25	6	Col5a2
1.61371e-28	-0.263278	0.57	0.75	3.22742e-25	6	Trib2
1.35706e-27	0.49436	0.685	0.709	2.71412e-24	6	Cxcl1
1.87102e-27	-0.271121	0.288	0.534	3.74203e-24	6	Sdf2l1
2.36256e-27	0.544386	0.483	0.487	4.72513e-24	6	Gpc6
9.48413e-27	-0.42675	0.239	0.489	1.89683e-23	6	Cbfa2t3
4.12545e-26	0.250599	0.818	0.798	8.2509e-23	6	Apoe
8.20617e-26	-0.330292	0.267	0.509	1.64123e-22	6	Kif20b
1.15043e-25	0.482525	0.83	0.881	2.30086e-22	6	Gadd45b
5.55724e-24	-0.263361	0.325	0.522	1.11145e-20	6	Col6a1
6.31028e-24	-0.266687	0.533	0.723	1.26206e-20	6	Ccdc34
2.4498e-23	-0.300524	0.313	0.516	4.89961e-20	6	Kif11
4.03632e-23	-0.293388	0.676	0.813	8.07264e-20	6	Tmpo
6.11259e-23	-0.306872	0.372	0.57	1.22252e-19	6	Emx2
9.37396e-23	-0.298753	0.402	0.555	1.87479e-19	6	Ccna2
1.7759e-22	-0.329274	0.788	0.912	3.55179e-19	6	Ier3
1.81299e-22	-0.332901	0.228	0.46	3.62599e-19	6	Cdk1
2.01194e-22	-0.419968	0.281	0.495	4.02389e-19	6	Gm45889
2.18183e-22	-0.279742	0.484	0.669	4.36366e-19	6	Ckap5
2.51578e-21	-0.319295	0.418	0.59	5.03156e-18	6	Dtl
2.78108e-21	-0.285412	0.358	0.532	5.56216e-18	6	Mis18bp1
4.0046e-21	-0.274153	0.559	0.699	8.0092e-18	6	Armcx5
8.58805e-21	0.31478	0.661	0.675	1.71761e-17	6	Cyp1b1
2.24085e-19	0.32332	0.404	0.392	4.48169e-16	6	Tgfb2
2.24428e-19	-0.475995	0.516	0.689	4.48855e-16	6	Smc4
4.2401e-19	-0.282892	0.708	0.809	8.48019e-16	6	Zfp277
5.39656e-19	0.367163	0.487	0.485	1.07931e-15	6	Col6a3
1.08712e-18	-0.449319	0.744	0.867	2.17424e-15	6	Arl6ip1
2.70924e-18	-0.256198	0.991	0.995	5.41847e-15	6	Map1b
3.17528e-18	-0.261785	0.612	0.789	6.35056e-15	6	Cnmd
1.41161e-17	-0.339108	0.399	0.556	2.82322e-14	6	Gsta4
4.1287e-17	0.324563	0.833	0.854	8.2574e-14	6	Metrnl
4.35609e-17	-0.37745	0.472	0.634	8.71217e-14	6	Fbxo21
1.57798e-16	0.294155	0.645	0.723	3.15595e-13	6	Pdzd2
2.50055e-16	-0.289881	0.333	0.527	5.00111e-13	6	Hist1h2ae
2.38658e-15	0.32658	0.474	0.523	4.77317e-12	6	Cav1
2.92619e-14	-0.456243	0.558	0.671	5.85239e-11	6	Nnat
1.01732e-13	0.330064	0.765	0.841	2.03463e-10	6	Tex14
1.24751e-13	-0.274656	0.981	0.987	2.49502e-10	6	Gja1
1.49732e-13	0.270816	0.381	0.39	2.99464e-10	6	Clec2d
6.20693e-13	-0.456086	0.342	0.514	1.24139e-09	6	Cdc20
8.28169e-13	-0.252152	0.243	0.446	1.65634e-09	6	Rrm2
1.8751e-12	0.377569	0.545	0.606	3.7502e-09	6	Hist1h1c
2.60009e-12	-0.295237	0.99	0.992	5.20019e-09	6	Tubb5
3.30177e-11	0.335842	0.337	0.349	6.60355e-08	6	Coch
4.63919e-11	-0.343767	0.603	0.794	9.27838e-08	6	Mgp
5.43551e-11	-0.300434	0.396	0.539	1.0871e-07	6	Kif23
1.45939e-10	0.25148	0.615	0.646	2.91879e-07	6	Phlda1
1.03423e-09	-0.417077	0.25	0.441	2.06847e-06	6	Mical2
1.77187e-09	-0.256985	0.939	0.957	3.54374e-06	6	Ldha
4.41964e-07	0.272578	0.401	0.457	0.000883928	6	Cebpd
6.14057e-05	0.30577	0.548	0.691	0.122811	6	Myocd
0.000387189	-0.287919	0.179	0.397	0.774378	6	Gm14226
0.00120782	0.263937	0.568	0.694	1	6	Fbxo32
1.41217e-249	1.39549	0.946	0.771	2.82435e-246	7	Nap1l5
9.01953e-220	0.686234	0.999	0.993	1.80391e-216	7	Gapdh
1.73102e-215	0.77059	1	0.998	3.46204e-212	7	Inha
1.53559e-212	0.688172	1	0.993	3.07118e-209	7	Mif
1.94539e-198	0.737167	0.997	0.959	3.89079e-195	7	Bex4
1.27386e-194	-1.24343	1	1	2.54772e-191	7	Malat1
5.99871e-193	0.778374	0.869	0.742	1.19974e-189	7	Dnajb13
1.35106e-189	1.23325	0.915	0.75	2.70212e-186	7	Slc38a5
2.80901e-186	0.859202	0.98	0.896	5.61802e-183	7	Apoa4
1.18743e-166	0.564638	1	0.998	2.37487e-163	7	Akr1cl
6.86005e-162	0.675159	1	0.973	1.37201e-158	7	Htra1
1.64119e-158	0.679223	0.992	0.95	3.28237e-155	7	Psma2
2.76713e-149	0.587593	0.978	0.911	5.53427e-146	7	Cndp2
4.83191e-149	0.756282	0.964	0.86	9.66382e-146	7	Eno1
4.93887e-142	0.614273	0.945	0.795	9.87774e-139	7	Zfp277
6.17839e-142	0.628492	0.981	0.926	1.23568e-138	7	Derl3
1.36967e-139	0.559906	1	0.983	2.73935e-136	7	Cyb5a
2.08323e-139	0.589935	0.934	0.821	4.16646e-136	7	Evc2
6.99866e-134	0.609682	0.843	0.644	1.39973e-130	7	Fam81a
8.2722e-132	0.540679	0.993	0.924	1.65444e-128	7	Carhsp1
1.14267e-122	0.526044	0.999	0.986	2.28534e-119	7	Gja1
1.8078e-122	0.553663	0.999	0.962	3.61559e-119	7	Ucp2
2.47163e-120	0.612604	0.99	0.96	4.94326e-117	7	Cables1
8.15079e-120	0.603716	0.985	0.878	1.63016e-116	7	Fst
1.95236e-119	0.553567	0.993	0.954	3.90471e-116	7	Csrp2
1.00034e-111	-1.11923	0.562	0.813	2.00069e-108	7	Apoe
6.94967e-107	-0.680741	0.525	0.761	1.38993e-103	7	Crip2
6.74895e-106	0.53517	0.989	0.93	1.34979e-102	7	Tpi1
1.23034e-104	0.461039	0.932	0.744	2.46068e-101	7	Ppa1
3.98898e-104	0.506209	0.99	0.907	7.97796e-101	7	Manf
8.28404e-102	0.53363	0.968	0.902	1.65681e-98	7	Arhgap28
5.1045e-101	0.578577	0.994	0.953	1.0209e-97	7	Ldha
1.28475e-99	-1.1281	0.459	0.698	2.56951e-96	7	Itga6
5.38449e-99	0.39468	0.683	0.583	1.0769e-95	7	Psd
1.74474e-98	0.456463	0.913	0.739	3.48947e-95	7	Hsd17b1
2.49157e-98	0.536245	0.93	0.863	4.98313e-95	7	Ptpre
1.4741e-97	0.442483	0.859	0.726	2.94819e-94	7	Mpped2
1.74804e-96	0.437758	0.996	0.937	3.49608e-93	7	Grb14
2.28491e-96	0.495276	0.961	0.85	4.56983e-93	7	Pgk1
4.35892e-96	-1.17235	0.441	0.7	8.71783e-93	7	Wnt4
3.95893e-95	0.677091	0.933	0.786	7.91787e-92	7	Fabp5
2.67881e-94	-1.56756	0.544	0.751	5.35763e-91	7	Tmsb4x
1.53672e-92	-0.726658	0.687	0.828	3.07344e-89	7	Wt1
1.34135e-88	-0.971547	0.575	0.747	2.68271e-85	7	Gas6
2.1343e-88	0.412004	0.908	0.832	4.26861e-85	7	Tex14
5.30603e-88	0.413799	0.999	0.993	1.06121e-84	7	Hsp90b1
4.6125e-87	0.45483	0.926	0.849	9.22499e-84	7	Dock4
2.429e-85	0.584599	0.839	0.761	4.858e-82	7	Rasl10a
1.94012e-83	0.474897	0.892	0.795	3.88025e-80	7	Tex15
4.39467e-81	0.500739	0.833	0.675	8.78935e-78	7	Car14
4.43879e-81	-0.429356	0.453	0.745	8.87758e-78	7	Kcnk2
2.53737e-79	0.418207	0.973	0.898	5.07474e-76	7	Fbln1
6.55713e-79	0.416678	0.875	0.818	1.31143e-75	7	Arhgdig
1.91783e-78	-0.256334	0.446	0.656	3.83565e-75	7	Bcam
8.01522e-77	0.352371	0.667	0.575	1.60304e-73	7	Otor
6.30885e-76	0.361529	0.913	0.812	1.26177e-72	7	Nt5dc2
1.44587e-75	0.416426	0.97	0.913	2.89173e-72	7	Igf1
9.97139e-74	0.419752	0.926	0.789	1.99428e-70	7	Hpgd
3.08086e-73	-1.21628	0.448	0.654	6.16172e-70	7	AC167229.1
1.5833e-71	0.526767	0.832	0.713	3.1666e-68	7	Rgcc
2.75805e-71	-1.05717	0.814	0.859	5.5161e-68	7	Gstm2
1.78448e-69	-0.719058	0.989	0.994	3.56896e-66	7	Sox4
7.21404e-69	-0.732252	0.495	0.723	1.44281e-65	7	Cst12
1.5196e-68	-1.75493	0.707	0.857	3.03919e-65	7	Cald1
2.34191e-68	0.465382	0.997	0.978	4.68383e-65	7	Rgs2
3.47608e-68	-0.543438	0.649	0.794	6.95216e-65	7	Serpinf1
1.11562e-66	0.380188	0.742	0.739	2.23125e-63	7	Edn1
1.89803e-64	0.391262	1	0.983	3.79607e-61	7	Serpine2
3.21946e-64	0.344262	0.998	0.96	6.43891e-61	7	Foxo1
9.41234e-64	0.376872	0.779	0.712	1.88247e-60	7	Vpreb3
3.64182e-63	-0.522815	0.413	0.669	7.28363e-60	7	Timp3
2.48026e-62	0.308397	0.867	0.7	4.96053e-59	7	Fdxr
2.52594e-62	0.369652	0.957	0.831	5.05188e-59	7	Selenoh
3.06126e-61	0.346642	0.855	0.764	6.12253e-58	7	Ano4
3.49834e-61	0.263964	0.737	0.675	6.99669e-58	7	Folr1
9.75867e-61	-0.658987	0.871	0.94	1.95173e-57	7	Pik3r1
6.2107e-60	0.384571	0.999	0.994	1.24214e-56	7	Map1b
9.58627e-59	0.38927	0.862	0.774	1.91725e-55	7	Ddah1
1.11221e-58	-0.47102	0.436	0.674	2.22442e-55	7	Tagln
1.56126e-58	0.317793	0.958	0.901	3.12251e-55	7	Bcat1
2.92079e-58	-0.967037	0.418	0.607	5.84158e-55	7	Col18a1
5.47326e-58	-0.737049	0.851	0.919	1.09465e-54	7	Sdc4
1.08327e-57	0.376194	0.624	0.477	2.16654e-54	7	Crabp2
1.83278e-56	0.374556	0.947	0.845	3.66557e-53	7	Odc1
7.97811e-56	-0.76996	0.769	0.89	1.59562e-52	7	Thbs1
1.90092e-55	-0.83022	0.443	0.682	3.80184e-52	7	Tuba1a
2.77897e-55	-0.274256	0.271	0.536	5.55795e-52	7	Mis18bp1
1.54899e-54	0.444414	0.876	0.838	3.09798e-51	7	Fam46a
3.0194e-54	-0.618004	0.404	0.626	6.0388e-51	7	Kitl
3.41557e-54	0.372052	0.706	0.613	6.83115e-51	7	Slc38a3
1.02097e-53	0.359717	0.967	0.929	2.04194e-50	7	Fscn1
5.54206e-53	0.325692	0.962	0.898	1.10841e-49	7	Ank3
3.19773e-52	0.295765	0.691	0.639	6.39545e-49	7	Sema3g
2.12513e-51	0.334798	0.998	0.973	4.25026e-48	7	Txnl1
3.13987e-51	0.357423	0.865	0.773	6.27974e-48	7	Ubash3b
3.51345e-49	0.284513	1	0.997	7.02691e-46	7	Ctsl
4.0942e-49	-0.596382	0.423	0.636	8.1884e-46	7	Fbxo21
5.26679e-49	0.297538	0.898	0.733	1.05336e-45	7	Hmgn2
2.22589e-48	-0.463945	0.346	0.625	4.45178e-45	7	Ghr
3.10221e-48	-0.761747	0.628	0.792	6.20442e-45	7	Vim
1.17753e-47	0.306617	0.858	0.783	2.35506e-44	7	Tox2
1.40098e-47	-0.721883	0.347	0.587	2.80197e-44	7	Hist1h1b
2.12232e-47	0.30712	0.631	0.52	4.24465e-44	7	Mgarp
2.30254e-47	-0.450266	0.435	0.621	4.60509e-44	7	Sorbs2
7.97011e-47	-0.620756	0.783	0.864	1.59402e-43	7	Arl6ip1
2.18207e-46	-0.377266	0.546	0.702	4.36413e-43	7	Pla2g1b
7.82003e-46	-0.415936	0.412	0.601	1.56401e-42	7	Myl9
8.75657e-46	-0.357008	0.998	0.983	1.75131e-42	7	Ldhb
1.47958e-45	0.285164	0.981	0.946	2.95917e-42	7	Mlf1
5.58221e-45	-0.442279	0.808	0.906	1.11644e-41	7	Flna
6.37635e-45	-0.849546	0.746	0.839	1.27527e-41	7	Sparc
1.32808e-43	0.26447	0.871	0.785	2.65616e-40	7	Jam2
1.56791e-43	-0.510476	0.701	0.81	3.13582e-40	7	Rap2b
7.42306e-43	0.272073	0.79	0.764	1.48461e-39	7	Agt
4.87198e-41	-0.348985	0.364	0.575	9.74396e-38	7	Espn
8.51218e-41	0.335137	0.714	0.693	1.70244e-37	7	Ccnb2
2.97712e-40	0.285232	0.977	0.934	5.95423e-37	7	Mt1
8.52325e-40	-0.370377	0.226	0.488	1.70465e-36	7	Cbfa2t3
6.38209e-39	-0.331033	0.467	0.636	1.27642e-35	7	Plxna2
1.70576e-38	-0.698805	0.45	0.653	3.41152e-35	7	Fbn2
3.32347e-38	0.302616	0.841	0.817	6.64693e-35	7	Serpinb1a
3.58354e-38	-0.250042	0.341	0.569	7.16709e-35	7	Spc25
6.75057e-38	-0.493169	0.733	0.821	1.35011e-34	7	Tmem184a
3.67795e-37	-0.307156	0.394	0.607	7.3559e-34	7	Tdrp
6.3448e-37	-0.368455	0.325	0.543	1.26896e-33	7	Shtn1
7.06585e-37	-0.428813	0.184	0.444	1.41317e-33	7	Mical2
3.16996e-35	-0.431107	0.82	0.87	6.33993e-32	7	Myo10
1.07303e-34	-0.283658	0.396	0.544	2.14606e-31	7	Cntn4
2.99579e-34	0.330365	0.857	0.806	5.99158e-31	7	H2-K1
1.38466e-33	-0.455232	0.454	0.602	2.76933e-30	7	Pcsk6
2.10713e-32	-0.398967	0.297	0.492	4.21426e-29	7	Gm45889
8.68462e-32	0.542655	0.914	0.878	1.73692e-28	7	Apoa1
4.14669e-31	0.269129	0.922	0.81	8.29338e-28	7	Rnf19b
5.82621e-31	-0.386814	0.597	0.707	1.16524e-27	7	Fxyd6
1.35657e-30	0.26154	0.673	0.687	2.71314e-27	7	Gm13889
5.72216e-30	-0.46194	0.971	0.947	1.14443e-26	7	Isyna1
7.95993e-30	-0.454858	0.574	0.701	1.59199e-26	7	Tacc1
8.98004e-30	-0.385214	0.48	0.654	1.79601e-26	7	Phlda1
1.81975e-29	-0.305428	0.671	0.803	3.63951e-26	7	Rangap1
2.69211e-29	-0.411247	0.935	0.944	5.38423e-26	7	Soat1
5.82692e-29	0.295685	0.731	0.658	1.16538e-25	7	H2-D1
6.31124e-29	-0.623956	0.638	0.758	1.26225e-25	7	Gadd45g
5.90093e-27	-0.264699	0.17	0.426	1.18019e-23	7	Gucy1a1
8.11271e-27	-0.65515	0.724	0.827	1.62254e-23	7	Neat1
1.26417e-26	-0.320896	0.322	0.526	2.52834e-23	7	Hist1h2ae
1.52234e-26	-0.387703	0.606	0.695	3.04467e-23	7	Adgrg1
1.05837e-25	-0.385281	0.308	0.525	2.11674e-22	7	Aldh1a1
1.57085e-25	-0.672365	0.455	0.614	3.1417e-22	7	Prc1
7.01383e-25	-0.405674	0.422	0.595	1.40277e-21	7	Ank2
1.06212e-24	-0.425627	0.479	0.637	2.12424e-21	7	Incenp
1.82676e-24	-0.492273	0.412	0.575	3.65351e-21	7	Vcan
3.82907e-24	-0.682993	0.329	0.5	7.65813e-21	7	Gatm
9.23235e-24	-0.509005	0.36	0.514	1.84647e-20	7	Wnt6
1.8579e-22	-0.354741	0.912	0.928	3.71579e-19	7	Jpt1
9.20731e-22	-0.517516	0.515	0.658	1.84146e-18	7	Acta2
1.44605e-21	-0.367743	0.638	0.782	2.89209e-18	7	Meg3
5.27686e-21	-0.761023	0.824	0.862	1.05537e-17	7	Cfh
7.3075e-21	-0.253528	0.405	0.582	1.4615e-17	7	G2e3
1.25233e-20	-0.500662	0.374	0.533	2.50466e-17	7	Aard
1.50189e-20	-0.3752	0.388	0.537	3.00377e-17	7	Ifitm1
1.50537e-20	-0.266286	0.557	0.693	3.01075e-17	7	Lpp
2.82933e-20	-0.337387	0.784	0.806	5.65866e-17	7	Tmpo
3.6105e-20	-0.776829	0.274	0.463	7.221e-17	7	Igfbp5
1.03612e-19	-0.325575	0.553	0.652	2.07223e-16	7	Col4a1
1.59289e-19	-0.295012	0.411	0.579	3.18579e-16	7	Ccnb1
1.73385e-19	-0.294917	0.534	0.669	3.4677e-16	7	Tuba1c
1.86609e-19	-0.275292	0.696	0.786	3.73219e-16	7	Ptch1
4.18862e-19	-0.294635	0.289	0.485	8.37724e-16	7	1190002N15Rik
4.27694e-19	-0.317443	0.636	0.719	8.55387e-16	7	Dpf3
4.70943e-19	-1.22368	0.569	0.684	9.41887e-16	7	Top2a
1.57095e-18	-0.407075	0.336	0.505	3.1419e-15	7	Rasd1
2.36448e-18	-0.289385	0.74	0.81	4.72897e-15	7	Slc40a1
4.78205e-18	-0.437801	0.994	0.993	9.56411e-15	7	Clu
6.54046e-18	-0.362464	0.58	0.698	1.30809e-14	7	Selenop
1.07529e-17	-0.441537	0.478	0.598	2.15057e-14	7	Cited4
1.50364e-17	-0.478938	0.892	0.946	3.00728e-14	7	Klf6
2.58009e-17	-0.406973	0.537	0.633	5.16019e-14	7	Gtf2a1
1.10154e-16	-0.567589	0.933	0.965	2.20307e-13	7	Cited2
3.43554e-16	-0.444715	0.869	0.906	6.87107e-13	7	Ier3
3.87445e-16	-0.317975	0.341	0.533	7.74891e-13	7	Rasl11a
1.54401e-15	-0.448754	0.944	0.96	3.08802e-12	7	Tpm1
1.88792e-15	-0.288648	0.65	0.734	3.77584e-12	7	Ezh2
2.41659e-15	-0.368164	0.997	0.997	4.83318e-12	7	Gm42418
7.3355e-15	-0.278082	0.839	0.853	1.4671e-11	7	Myo1b
8.51648e-15	-0.30365	0.396	0.505	1.7033e-11	7	Gldn
1.05541e-14	-0.440585	0.549	0.653	2.11082e-11	7	H2afx
1.6806e-14	-0.272408	0.724	0.823	3.36121e-11	7	Atp1b1
3.91668e-14	-0.346518	0.877	0.862	7.83336e-11	7	Gpx3
8.75133e-14	-0.303833	0.967	0.945	1.75027e-10	7	Amhr2
1.70419e-13	-0.251104	0.477	0.615	3.40837e-10	7	Uhrf1
7.74596e-13	-0.385187	0.708	0.788	1.54919e-09	7	Atf3
8.62704e-12	-0.380046	0.317	0.465	1.72541e-08	7	Gm37350
1.75678e-11	-0.259224	0.587	0.662	3.51356e-08	7	Ckap5
3.07823e-11	-0.513225	0.841	0.829	6.15646e-08	7	Kctd14
4.17742e-11	-0.531001	0.915	0.941	8.35484e-08	7	Prss23
7.03774e-11	-0.381207	0.672	0.736	1.40755e-07	7	Ddit4l
1.23887e-10	-0.387243	0.74	0.772	2.47774e-07	7	Mphosph8
1.48844e-10	-0.278175	0.792	0.857	2.97688e-07	7	Pim1
1.74845e-10	-0.284298	0.463	0.563	3.49689e-07	7	Emx2
2.58633e-10	-0.387638	0.903	0.924	5.17267e-07	7	Junb
3.30571e-10	-0.368037	0.518	0.607	6.61142e-07	7	Smc2
3.41169e-10	-0.364895	0.994	0.992	6.82338e-07	7	Tubb5
4.42835e-10	-0.445409	0.596	0.694	8.85671e-07	7	Fhl1
6.48352e-10	-0.385113	0.708	0.75	1.2967e-06	7	Rasgef1b
1.642e-09	-0.341496	0.768	0.768	3.28399e-06	7	Etnk2
1.84564e-09	-0.26436	0.716	0.77	3.69127e-06	7	Mylk
2.22987e-09	-0.49921	0.887	0.896	4.45974e-06	7	Maged2
2.40102e-09	-0.355689	0.304	0.454	4.80205e-06	7	Cdk1
4.84123e-09	-0.261007	0.398	0.516	9.68246e-06	7	Pcp4l1
4.9897e-09	-0.550426	0.691	0.687	9.97941e-06	7	Ube2c
8.4912e-09	-0.31888	0.518	0.643	1.69824e-05	7	Hmmr
9.75247e-09	-0.324486	0.749	0.822	1.95049e-05	7	Cyr61
1.3932e-08	-0.317553	0.592	0.673	2.7864e-05	7	Atad2
1.39812e-08	-0.257873	0.401	0.495	2.79624e-05	7	Igfbp6
1.7884e-08	-0.527957	0.529	0.642	3.57679e-05	7	Pclaf
1.1698e-07	-0.293047	0.474	0.58	0.000233959	7	Pbk
4.08346e-07	-0.602777	0.789	0.781	0.000816691	7	Hmgb2
4.63049e-07	-0.270955	0.384	0.5	0.000926097	7	Kif20b
5.49773e-07	-0.50233	0.8	0.868	0.00109955	7	Gm26917
9.79664e-07	-0.298559	0.62	0.691	0.00195933	7	Id1
1.50638e-06	-0.38084	0.534	0.643	0.00301276	7	Tpx2
2.10655e-06	-0.42665	0.777	0.872	0.00421311	7	Pik3ip1
4.17426e-06	-0.262309	0.623	0.592	0.00834852	7	Cenpe
4.40111e-06	-0.467818	0.692	0.798	0.00880221	7	Col11a1
5.13482e-06	-0.286836	0.59	0.717	0.0102696	7	Bmp2
1.08907e-05	-0.289991	0.529	0.644	0.0217814	7	Knl1
2.2118e-05	-0.279477	0.448	0.535	0.044236	7	Kif23
4.07626e-05	-0.402952	0.447	0.533	0.0815252	7	Nusap1
0.000459463	-0.299813	0.545	0.636	0.918926	7	Hsd3b1
0.000461143	-0.379496	0.678	0.697	0.922285	7	Cenpf
0.000821854	-0.279495	0.643	0.674	1	7	Birc5
0.00408558	-0.257284	0.513	0.566	1	7	Hs6st2
0.00416254	-0.415536	0.669	0.788	1	7	Rarres2
0	1.51552	0.997	0.849	0	8	Gstm2
0	1.4041	0.993	0.576	0	8	Col18a1
0	1.38258	0.987	0.624	0	8	AC167229.1
0	1.22108	0.992	0.668	0	8	Itga6
2.56335e-300	1.13924	0.995	0.724	5.12669e-297	8	Gas6
3.61693e-292	0.735171	0.931	0.515	7.23386e-289	8	Cntn4
2.54513e-283	0.977689	0.996	0.807	5.09026e-280	8	Tmem184a
1.94794e-271	1.05102	0.96	0.607	3.89588e-268	8	Fbxo21
1.68687e-270	1.32632	0.993	0.821	3.37374e-267	8	Kctd14
1.96831e-267	0.994668	0.892	0.405	3.93661e-264	8	Mical2
9.83107e-265	0.862117	0.89	0.479	1.96621e-261	8	Gldn
3.85806e-258	1.01253	0.925	0.468	7.71613e-255	8	Gatm
5.6604e-257	0.857902	1	0.943	1.13208e-253	8	Amhr2
2.60109e-255	0.982496	0.911	0.485	5.20217e-252	8	Wnt6
5.96985e-245	0.667915	1	0.983	1.19397e-241	8	Ldhb
3.07863e-244	0.781828	0.912	0.545	6.15726e-241	8	Espn
2.94776e-242	1.16388	0.985	0.67	5.89552e-239	8	Wnt4
1.10143e-241	0.842762	0.915	0.577	2.20286e-238	8	Pcsk6
1.09207e-232	0.826815	0.985	0.776	2.18414e-229	8	Serpinf1
1.50363e-229	0.875679	0.978	0.729	3.00725e-226	8	Fndc5
3.95302e-229	0.26591	0.84	0.391	7.90604e-226	8	Sulf1
1.56518e-226	0.867253	0.996	0.825	3.13035e-223	8	Sparc
3.0685e-225	0.573701	0.859	0.449	6.13699e-222	8	Mapk13
5.00736e-216	0.870874	0.992	0.891	1.00147e-212	8	Maged2
2.08582e-209	0.774737	0.999	0.945	4.17163e-206	8	Isyna1
7.44158e-205	0.947882	0.899	0.505	1.48832e-201	8	Aard
2.26682e-202	0.976985	0.948	0.738	4.53363e-199	8	Rasgef1b
5.67602e-197	0.286456	0.843	0.471	1.1352e-193	8	Tgfbi
6.78137e-195	0.89517	0.919	0.548	1.35627e-191	8	Vcan
3.66767e-193	0.773422	0.991	0.861	7.33533e-190	8	Myo10
2.18972e-187	0.946929	0.966	0.697	4.37943e-184	8	Cst12
1.41081e-185	0.68063	0.856	0.462	2.82161e-182	8	Gm45889
3.83385e-173	0.668439	0.963	0.701	7.66771e-170	8	Dpf3
8.15935e-162	0.605538	0.865	0.453	1.63187e-158	8	Cbfa2t3
3.55502e-159	0.583743	0.914	0.579	7.11003e-156	8	Tdrp
4.80658e-158	0.881705	1	0.984	9.61316e-155	8	Serpinb6a
[truncated: 2,431 more rows]

## Sheet: Top250_Mesenchymal
Preferentially expressed genes: re-clustered mesenchymal cell clusters g0–g20
p_val	avg_log2FC	pct.1	pct.2	p_val_adj	cluster	gene
0	1.54315	0.915	0.61	0	0	Wt1
0	1.31521	0.967	0.875	0	0	Pim1
0	1.30169	0.931	0.791	0	0	Hoxd9
0	1.23516	0.932	0.798	0	0	Wnt4
0	0.918571	0.948	0.85	0	0	Ldhb
0	0.812147	0.997	0.96	0	0	Mgp
0	0.483022	0.837	0.564	0	0	Coch
0	0.394048	0.877	0.616	0	0	Gm15866
0	0.278105	0.85	0.448	0	0	Hoxd11
1.76286e-285	0.996598	0.987	0.953	3.52572e-282	0	Igfbp6
1.60124e-283	0.833941	0.969	0.856	3.20247e-280	0	Slc9a3r2
8.36514e-282	-0.432204	0.34	0.654	1.67303e-278	0	Mest
3.96417e-255	0.646249	0.99	0.97	7.92835e-252	0	Ctsl
1.47467e-245	0.773873	0.956	0.868	2.94935e-242	0	Kcnk2
8.54478e-245	1.26288	0.979	0.89	1.70896e-241	0	Ier3
1.3431e-237	0.381675	0.894	0.735	2.68621e-234	0	Cxcl1
3.25138e-234	-0.262597	0.532	0.78	6.50276e-231	0	Tnni3
2.71482e-230	-0.418263	0.612	0.781	5.42964e-227	0	Glipr2
1.16772e-229	0.686541	0.981	0.921	2.33543e-226	0	Mmp2
8.99943e-227	0.912298	0.98	0.932	1.79989e-223	0	Ifitm1
3.63002e-208	-0.358106	0.727	0.798	7.26004e-205	0	Lama4
7.8872e-206	0.658056	0.749	0.565	1.57744e-202	0	Hmga2
1.23266e-204	0.727205	0.732	0.503	2.46532e-201	0	Hoxd10
2.04397e-202	-0.49586	0.687	0.816	4.08794e-199	0	Akap12
6.01391e-198	0.549014	0.995	0.991	1.20278e-194	0	Itih5
1.80921e-195	-0.443026	0.519	0.691	3.61842e-192	0	Mmd2
1.79625e-190	-0.255405	0.515	0.724	3.5925e-187	0	Alpl
2.18642e-189	0.288919	0.718	0.518	4.37284e-186	0	Fmo2
1.31514e-184	0.731154	0.978	0.92	2.63028e-181	0	Htra1
2.4532e-182	0.626707	0.838	0.619	4.9064e-179	0	Tgfbi
4.73571e-181	1.0824	0.676	0.46	9.47142e-178	0	Slc26a7
1.48102e-180	0.333096	1	0.999	2.96204e-177	0	Sparc
1.37579e-178	-0.369847	0.585	0.737	2.75157e-175	0	Crip1
7.1617e-174	0.63512	0.921	0.794	1.43234e-170	0	Gpx3
1.15279e-168	-0.347222	0.466	0.684	2.30559e-165	0	1500009L16Rik
6.29783e-167	-0.399272	0.633	0.684	1.25957e-163	0	Nrxn1
3.93213e-158	0.472997	0.772	0.56	7.86426e-155	0	Ms4a4d
4.70296e-158	0.692402	0.832	0.688	9.40591e-155	0	Lrrc17
1.31576e-156	-0.356569	0.542	0.684	2.63152e-153	0	Aoc3
1.11767e-155	0.582584	0.817	0.737	2.23535e-152	0	Bcat1
3.37322e-154	0.568683	0.843	0.619	6.74645e-151	0	Gng11
1.01998e-153	0.869434	0.74	0.564	2.03995e-150	0	Gata6
2.03064e-153	0.628575	0.872	0.774	4.06128e-150	0	Fxyd6
3.79285e-151	-0.396642	0.452	0.638	7.5857e-148	0	Emcn
6.67534e-151	0.301021	0.693	0.559	1.33507e-147	0	Plce1
1.01481e-150	0.567984	0.71	0.514	2.02962e-147	0	Tnc
1.60746e-145	0.489357	0.971	0.959	3.21492e-142	0	Rbp1
6.02598e-139	0.549554	0.838	0.633	1.2052e-135	0	Myo10
1.24091e-134	-0.362423	0.532	0.687	2.48182e-131	0	Serpine1
6.96986e-133	-0.489702	0.539	0.703	1.39397e-129	0	Fdxr
1.05462e-132	0.526552	0.965	0.907	2.10924e-129	0	Sparcl1
4.23596e-128	-0.449118	0.71	0.857	8.47192e-125	0	Tubb6
6.78692e-128	0.657952	0.904	0.827	1.35738e-124	0	Col4a4
8.50918e-128	-0.437385	0.502	0.648	1.70184e-124	0	Trib2
4.3063e-127	0.755152	0.878	0.799	8.6126e-124	0	Thbs1
4.5979e-125	-0.397739	0.542	0.743	9.19579e-122	0	Loxl2
3.14143e-124	0.591474	0.839	0.745	6.28287e-121	0	Pdgfra
2.86872e-123	0.488617	0.999	0.978	5.73745e-120	0	Fosb
1.1044e-122	0.916301	0.745	0.632	2.20881e-119	0	Zdbf2
1.30642e-120	-0.287135	0.79	0.822	2.61284e-117	0	Ucp2
2.76361e-119	0.731607	0.865	0.783	5.52722e-116	0	Gm26532
3.40971e-119	-0.464748	0.713	0.794	6.81942e-116	0	Akr1b8
8.19517e-117	-0.492003	0.587	0.743	1.63903e-113	0	Ppp1r14a
2.87032e-116	0.707877	0.748	0.672	5.74063e-113	0	Lpl
1.41073e-115	0.460592	0.689	0.564	2.82145e-112	0	Atp1b1
2.27004e-114	0.682175	0.937	0.852	4.54008e-111	0	Icam1
5.75363e-114	0.718105	0.98	0.95	1.15073e-110	0	Lmna
1.98231e-113	0.265251	0.66	0.572	3.96463e-110	0	Col8a1
3.49162e-112	0.400415	0.844	0.648	6.98325e-109	0	Thbs4
5.58781e-112	-0.460782	0.642	0.7	1.11756e-108	0	Heyl
8.45322e-112	0.713288	0.865	0.76	1.69064e-108	0	Ier5
1.10777e-111	-0.359489	0.505	0.624	2.21554e-108	0	Tpx2
1.87189e-109	0.526725	0.836	0.718	3.74377e-106	0	Srpx2
2.62541e-108	0.395686	0.767	0.621	5.25083e-105	0	Cpz
1.64692e-106	0.541945	0.978	0.923	3.29384e-103	0	Pmepa1
2.24051e-105	0.549639	0.741	0.589	4.48102e-102	0	Metrnl
3.96435e-105	-0.367949	0.431	0.663	7.92871e-102	0	Gucy1a1
2.13832e-103	0.346467	0.846	0.728	4.27665e-100	0	Cdkn1a
2.46757e-102	0.626291	0.724	0.569	4.93515e-99	0	Pik3r1
7.25417e-99	-0.359536	0.592	0.681	1.45083e-95	0	Nexmif
8.34075e-98	0.663154	0.796	0.671	1.66815e-94	0	Gadd45a
1.08417e-96	-0.311106	0.573	0.692	2.16834e-93	0	Abca8a
5.57909e-96	-0.349527	0.609	0.658	1.11582e-92	0	Sox9
1.66258e-95	-0.306045	0.46	0.663	3.32516e-92	0	Phgdh
4.80863e-93	0.584784	0.774	0.649	9.61726e-90	0	Bhlhe40
1.34177e-92	0.530613	0.75	0.621	2.68355e-89	0	Wnt5a
2.23375e-92	-0.497803	0.44	0.578	4.4675e-89	0	Enpep
5.09139e-92	0.605873	0.635	0.385	1.01828e-88	0	Penk
6.70052e-92	-0.359522	0.621	0.758	1.3401e-88	0	Osr2
6.736e-92	-0.393471	0.572	0.766	1.3472e-88	0	2810474O19Rik
1.98344e-90	-0.357572	0.786	0.635	3.96687e-87	0	Clec3b
7.32796e-90	-0.257214	0.575	0.655	1.46559e-86	0	Rassf5
4.41218e-89	0.355781	0.928	0.87	8.82435e-86	0	Gas6
6.56043e-89	0.267592	0.974	0.95	1.31209e-85	0	Dcn
5.30721e-88	-0.262344	0.371	0.551	1.06144e-84	0	Lgi2
7.78497e-87	-0.39901	0.568	0.768	1.55699e-83	0	Matn2
1.06539e-86	-0.320743	0.586	0.713	2.13078e-83	0	Adcy7
1.57253e-86	-0.460256	0.944	0.973	3.14506e-83	0	Col6a1
3.76781e-85	0.440322	0.916	0.897	7.53562e-82	0	Selenop
3.27893e-84	-0.281907	0.36	0.534	6.55787e-81	0	Nrk
1.85956e-81	0.391385	1	0.999	3.71912e-78	0	Malat1
6.7955e-81	0.55416	0.945	0.889	1.3591e-77	0	Socs3
2.02587e-80	0.494826	0.76	0.676	4.05174e-77	0	Lsp1
2.25578e-80	-0.318016	0.538	0.717	4.51156e-77	0	6030408B16Rik
1.4646e-79	-0.294476	0.4	0.55	2.92921e-76	0	Smc2
2.35976e-79	0.409613	0.998	0.972	4.71953e-76	0	Junb
2.67707e-79	0.366088	0.978	0.946	5.35414e-76	0	Mdk
3.99765e-79	-0.496429	0.654	0.796	7.9953e-76	0	Cnn2
9.17763e-78	0.581	0.97	0.945	1.83553e-74	0	Gadd45b
1.25169e-77	0.569023	0.941	0.868	2.50338e-74	0	Neat1
3.0319e-76	-0.369103	0.744	0.824	6.0638e-73	0	Bpgm
3.95522e-74	-0.311717	0.743	0.644	7.91044e-71	0	Gsta2
4.68365e-74	-0.359733	0.478	0.635	9.36729e-71	0	Pkdcc
5.30793e-74	-0.265813	0.488	0.622	1.06159e-70	0	Fam213a
6.63784e-73	-0.362354	0.766	0.763	1.32757e-69	0	Dtx4
1.72449e-72	0.256242	0.963	0.933	3.44897e-69	0	Serpinf1
7.47042e-71	-0.446139	0.627	0.803	1.49408e-67	0	Cxcl12
9.37925e-71	0.366604	0.768	0.624	1.87585e-67	0	Clec1a
1.83933e-70	-0.340438	0.753	0.782	3.67865e-67	0	Tgm2
2.22663e-70	0.284066	0.612	0.443	4.45326e-67	0	Ltbp2
2.62468e-70	-0.323044	0.558	0.651	5.24936e-67	0	Sorbs1
2.64962e-70	0.448737	0.977	0.95	5.29924e-67	0	Ldha
4.29714e-69	-0.401143	0.647	0.791	8.59427e-66	0	Ddit4l
1.35783e-68	-0.354588	0.908	0.957	2.71567e-65	0	Mif
3.1717e-68	0.503052	0.796	0.705	6.34339e-65	0	Tcf21
5.47241e-68	0.277692	0.989	0.986	1.09448e-64	0	Cst3
2.6632e-66	0.300973	0.995	0.976	5.3264e-63	0	Bgn
7.63606e-66	0.459685	0.785	0.699	1.52721e-62	0	Isyna1
7.2693e-65	0.554686	0.637	0.49	1.45386e-61	0	Col12a1
1.14163e-61	-0.347235	0.929	0.962	2.28325e-58	0	Hsp90b1
7.31823e-61	-0.446333	0.472	0.273	1.46365e-57	0	Hbb-bs
6.72163e-60	-0.485535	0.495	0.601	1.34433e-56	0	Cenpf
2.0258e-58	-0.289287	0.602	0.688	4.05159e-55	0	Nt5dc2
3.45569e-58	-0.392533	0.662	0.717	6.91138e-55	0	Rbp4
8.0515e-58	-0.315174	0.696	0.844	1.6103e-54	0	Jpt1
5.05808e-57	-0.406095	0.745	0.658	1.01162e-53	0	Vegfd
8.90742e-57	-0.263078	0.383	0.533	1.78148e-53	0	Vcan
2.17695e-56	0.463859	0.851	0.807	4.3539e-53	0	Itm2a
2.43433e-56	-0.461639	0.825	0.876	4.86867e-53	0	Cavin3
1.55092e-55	-0.250511	0.45	0.592	3.10185e-52	0	Igfbp5
3.85596e-55	-0.27991	0.588	0.689	7.71192e-52	0	Ntrk2
1.49376e-53	-0.386951	0.667	0.811	2.98752e-50	0	Col6a3
7.89207e-53	0.41098	0.922	0.885	1.57841e-49	0	Ccnd2
1.84949e-52	-0.495353	0.431	0.577	3.69899e-49	0	Fdx1
8.52259e-52	0.284385	0.648	0.546	1.70452e-48	0	Plxna2
2.29578e-51	-0.288342	0.554	0.726	4.59155e-48	0	Tmem100
1.60808e-48	-0.289546	0.385	0.49	3.21616e-45	0	Hist1h1b
4.34105e-48	-0.458685	0.598	0.636	8.6821e-45	0	Plac8
1.93131e-47	-0.375735	0.764	0.876	3.86261e-44	0	Ptch1
1.03769e-46	-0.292267	0.574	0.666	2.07538e-43	0	Emp1
1.25248e-46	-0.378721	0.941	0.962	2.50496e-43	0	Hmgb1
1.33031e-46	0.288741	0.975	0.955	2.66061e-43	0	Ube2s
4.4879e-46	-0.442605	0.993	0.99	8.97579e-43	0	Apoe
4.16602e-45	-0.259256	0.647	0.774	8.33205e-42	0	Slc29a1
1.27878e-44	0.43674	0.644	0.559	2.55756e-41	0	Sorbs2
5.32752e-44	0.507622	0.885	0.859	1.0655e-40	0	Rgs2
7.13583e-44	-0.322209	0.583	0.69	1.42717e-40	0	Selenoh
1.42489e-43	-0.35639	0.819	0.763	2.84978e-40	0	Colec11
5.75598e-43	-0.276335	0.884	0.947	1.1512e-39	0	Serpinb6a
9.90847e-43	-0.319722	0.754	0.745	1.98169e-39	0	Tmem119
3.88587e-42	-0.257868	0.544	0.589	7.77174e-39	0	Mt3
4.40444e-42	0.323996	0.996	0.98	8.80889e-39	0	Fos
1.10375e-41	-0.311794	0.517	0.558	2.20751e-38	0	Clca3a1
2.95857e-41	0.301502	0.597	0.44	5.91715e-38	0	Pde3a
3.0263e-41	-0.305643	0.769	0.856	6.0526e-38	0	Lama2
3.32576e-41	-0.299804	0.636	0.659	6.65152e-38	0	Hist1h2bc
4.9771e-40	-0.287858	0.722	0.767	9.95421e-37	0	Hs6st2
9.15982e-40	-0.42408	0.849	0.891	1.83196e-36	0	Hspd1
1.07376e-39	-0.413807	0.546	0.592	2.14752e-36	0	Sh3bgr
4.23275e-39	-0.270306	0.486	0.59	8.46549e-36	0	Filip1l
6.936e-39	0.483312	0.97	0.964	1.3872e-35	0	Sox4
1.55593e-38	0.331704	0.897	0.807	3.11185e-35	0	Socs2
3.92333e-38	-0.305913	0.887	0.928	7.84665e-35	0	Fstl1
4.86711e-37	-0.454297	0.655	0.666	9.73423e-34	0	Dpt
5.65025e-37	-0.277906	0.746	0.526	1.13005e-33	0	Bpifb4
6.29217e-37	0.272795	0.898	0.817	1.25843e-33	0	Txnip
1.28574e-35	-0.41849	0.424	0.512	2.57147e-32	0	Spon1
4.153e-35	0.600556	0.876	0.838	8.30601e-32	0	Nr4a2
1.35561e-34	-0.418915	0.876	0.758	2.71122e-31	0	Fhl1
4.32959e-34	0.357096	0.857	0.845	8.65917e-31	0	Nrp2
1.05727e-33	0.335009	0.944	0.841	2.11454e-30	0	Gm12840
3.53153e-33	0.253092	0.987	0.978	7.06306e-30	0	Ifitm3
3.59601e-33	0.889724	0.572	0.467	7.19202e-30	0	Hsd11b2
7.03254e-33	-0.398429	0.624	0.699	1.40651e-29	0	Prss35
2.09455e-31	0.252356	0.916	0.847	4.18909e-28	0	Nfkbia
1.41586e-30	-0.260223	0.574	0.649	2.83173e-27	0	Ncam1
3.44761e-30	-0.286765	0.991	0.993	6.89522e-27	0	Cald1
3.26449e-29	-0.364652	0.838	0.879	6.52899e-26	0	Tagln2
6.80528e-29	0.343188	0.641	0.542	1.36106e-25	0	Kitl
7.08925e-29	-0.369161	0.701	0.694	1.41785e-25	0	Fabp5
7.85145e-29	0.314035	0.76	0.746	1.57029e-25	0	Cdh11
2.34349e-28	0.341561	0.679	0.586	4.68698e-25	0	Bmp2
1.75538e-27	0.458994	0.577	0.469	3.51075e-24	0	Cdkn1c
2.61758e-27	0.313342	0.712	0.668	5.23516e-24	0	Lbh
3.07305e-27	-0.258433	0.691	0.581	6.1461e-24	0	Col14a1
1.59053e-25	-0.333846	0.833	0.882	3.18106e-22	0	Ran
2.63147e-25	0.261904	0.634	0.568	5.26295e-22	0	Ddit4
4.66642e-24	0.32389	0.676	0.611	9.33285e-21	0	Gas1
3.5963e-23	0.351734	0.732	0.68	7.19259e-20	0	Eng
1.01667e-22	-0.321115	0.829	0.895	2.03334e-19	0	Plpp3
2.00551e-22	0.294669	0.956	0.953	4.01103e-19	0	Klf4
2.20128e-22	0.26388	0.778	0.746	4.40256e-19	0	Ramp2
1.47735e-21	0.261338	0.775	0.733	2.95471e-18	0	Sgk1
3.8439e-18	0.297913	0.879	0.864	7.68781e-15	0	Chchd10
1.2105e-17	0.273854	0.945	0.902	2.421e-14	0	Gadd45g
3.28528e-17	-0.406486	0.51	0.526	6.57055e-14	0	Pdlim3
7.60503e-17	0.261455	0.755	0.789	1.52101e-13	0	Cables1
8.36563e-16	-0.310423	0.818	0.883	1.67313e-12	0	Htra3
2.79694e-15	-0.278467	0.472	0.5	5.59389e-12	0	Cenpa
3.73431e-15	0.320685	0.549	0.477	7.46861e-12	0	Ppfibp2
4.19378e-15	-0.47519	0.625	0.618	8.38757e-12	0	Pclaf
1.24249e-13	-0.369324	0.972	0.974	2.48497e-10	0	Tmsb4x
1.46862e-13	0.337327	0.765	0.761	2.93723e-10	0	Plagl1
1.77666e-13	-0.306577	0.818	0.853	3.55333e-10	0	Aebp1
3.10856e-13	-0.288595	0.909	0.929	6.21711e-10	0	Tuba1b
3.18156e-13	-0.415578	0.962	0.949	6.36312e-10	0	Mfap4
3.24954e-13	0.296694	0.719	0.714	6.49908e-10	0	Sdc4
6.6336e-13	0.375611	0.547	0.474	1.32672e-09	0	Bambi
1.77249e-12	-0.413076	0.737	0.759	3.54498e-09	0	Eln
8.10837e-12	0.336901	0.519	0.433	1.62167e-08	0	Plat
1.45025e-11	-0.40198	0.601	0.434	2.9005e-08	0	Cyp17a1
2.04134e-11	-0.275959	0.592	0.603	4.08267e-08	0	Lmnb1
4.04316e-11	0.261918	0.509	0.412	8.08633e-08	0	Plp1
5.14655e-11	-0.278754	0.629	0.615	1.02931e-07	0	Smc4
1.09964e-10	-0.348165	0.583	0.603	2.19928e-07	0	Pcp4l1
3.59529e-10	0.318761	0.764	0.73	7.19057e-07	0	Cwc25
1.16121e-09	0.259232	0.795	0.806	2.32241e-06	0	Serpine2
1.42109e-09	-0.325079	0.792	0.759	2.84217e-06	0	Smtn
5.59956e-09	-0.281938	0.743	0.688	1.11991e-05	0	Vldlr
7.35164e-09	-0.333079	0.65	0.57	1.47033e-05	0	Mt2
2.4309e-08	0.291914	0.68	0.688	4.8618e-05	0	Fbln5
4.48412e-08	-0.435767	0.618	0.582	8.96823e-05	0	Prc1
1.2678e-07	-0.441759	0.989	0.971	0.00025356	0	Col1a1
5.28762e-07	-0.309553	0.794	0.787	0.00105752	0	Lamc3
7.42856e-07	-0.465723	0.625	0.665	0.00148571	0	Hmgb2
9.24452e-07	0.252962	0.559	0.514	0.0018489	0	Ctgf
1.29862e-06	0.285339	0.672	0.733	0.00259723	0	Arhgap29
9.26608e-06	-0.314116	0.756	0.641	0.0185322	0	Ebf1
1.32585e-05	-0.432137	0.752	0.715	0.0265169	0	Cd24a
3.00058e-05	-0.285252	0.431	0.444	0.0600116	0	Pi15
3.5991e-05	0.292938	0.638	0.618	0.0719821	0	Rdh10
7.83198e-05	-0.2764	0.601	0.47	0.15664	0	Msmo1
0.00012816	-0.42227	0.849	0.847	0.256321	0	Clu
0.000151692	-0.312646	0.706	0.6	0.303384	0	Cdca8
0.000349668	0.352618	0.616	0.611	0.699335	0	Id1
0.000429156	-0.252402	0.969	0.946	0.858313	0	Cygb
0.000868265	-0.35124	0.712	0.65	1	0	Nexn
0.00099015	-0.331873	0.727	0.651	1	0	Mustn1
0.00149818	0.389139	0.485	0.426	1	0	Gatm
0.00836635	-0.457362	0.731	0.631	1	0	Mki67
0	1.62292	1	0.885	0	1	Acta2
0	1.38752	0.955	0.666	0	1	Fbxl22
0	1.37031	0.999	0.942	0	1	Mylk
0	1.36765	0.976	0.718	0	1	Myh11
0	1.33596	0.995	0.819	0	1	Tagln
0	1.32759	0.999	0.951	0	1	Myl9
0	1.13672	0.952	0.827	0	1	Map1b
0	1.12501	1	0.994	0	1	Myl6
0	1.1123	0.937	0.659	0	1	Lmod1
0	1.02169	0.936	0.751	0	1	Fhl1
0	0.990011	0.974	0.866	0	1	Lpp
0	0.964856	0.99	0.933	0	1	Csrp1
0	0.949657	0.928	0.764	0	1	Cnn2
0	0.890288	0.995	0.924	0	1	Tpm2
0	0.874963	0.999	0.981	0	1	Tpm1
0	0.861382	0.988	0.917	0	1	Flna
0	0.769828	0.915	0.733	0	1	Ccdc3
0	0.688225	0.946	0.611	0	1	Actg2
0	0.444404	0.801	0.561	0	1	Sh3bgr
0	0.29924	0.839	0.638	0	1	Mustn1
0	0.278052	0.893	0.649	0	1	Cnn1
2.69641e-302	1.11168	0.781	0.574	5.39283e-299	1	Ednrb
1.50356e-285	0.854425	0.84	0.635	3.00713e-282	1	Nexn
8.3563e-285	1.24068	0.927	0.759	1.67126e-281	1	Id2
2.17994e-282	0.904545	0.964	0.864	4.35988e-279	1	Csrp2
2.01661e-277	0.347928	0.819	0.634	4.03322e-274	1	Myl4
8.99594e-270	1.12058	0.923	0.772	1.79919e-266	1	Mfap5
2.73432e-265	0.799648	0.949	0.864	5.46864e-262	1	Foxo1
1.94332e-264	0.50467	0.779	0.591	3.88663e-261	1	Tnnt2
3.05079e-261	0.49456	0.836	0.618	6.10159e-258	1	Sorbs1
6.03999e-260	-0.260349	0.253	0.633	1.208e-256	1	Col14a1
1.34616e-254	0.554811	0.998	0.992	2.69233e-251	1	Cald1
2.27765e-254	0.7183	0.995	0.928	4.55529e-251	1	Ogn
7.62191e-248	0.769382	0.979	0.931	1.52438e-244	1	Serpinf1
8.86175e-233	0.775512	0.924	0.818	1.77235e-229	1	Grb14
1.36413e-228	1.30094	0.966	0.911	2.72826e-225	1	Atf3
7.97572e-226	-0.576587	0.707	0.786	1.59514e-222	1	Serpina3g
3.94777e-214	0.534245	0.997	0.971	7.89553e-211	1	Tmsb4x
2.4158e-209	0.797102	0.848	0.71	4.8316e-206	1	Cavin2
3.16949e-206	0.27109	0.766	0.616	6.33898e-203	1	Fam71a
1.17846e-205	0.634499	0.864	0.669	2.35692e-202	1	Itga1
3.27516e-194	-0.284127	0.281	0.581	6.55032e-191	1	Bpifb4
6.44068e-192	0.632915	1	0.978	1.28814e-188	1	Fosb
3.05942e-180	0.328164	0.791	0.638	6.11884e-177	1	Ehd4
1.08243e-173	-0.395279	0.673	0.781	2.16485e-170	1	Colec11
1.43149e-171	0.505689	0.827	0.619	2.86299e-168	1	Ncam1
1.12027e-169	0.568163	0.903	0.772	2.24055e-166	1	Palld
4.08588e-169	0.30887	0.749	0.596	8.17175e-166	1	Ntrk3
2.7584e-167	0.549788	0.928	0.864	5.51679e-164	1	Cavin3
1.89552e-166	0.468685	0.761	0.582	3.79104e-163	1	Pcp4l1
1.27831e-165	0.514162	0.808	0.674	2.55662e-162	1	Cav1
1.72851e-165	-0.362248	0.617	0.781	3.45702e-162	1	Dtx4
1.52857e-158	0.792923	0.726	0.64	3.05715e-155	1	Foxp2
9.72461e-158	-0.306834	0.449	0.679	1.94492e-154	1	Gsta2
1.9194e-151	0.255783	0.762	0.563	3.83879e-148	1	Psd
1.93548e-149	0.634319	0.987	0.954	3.87097e-146	1	Rarres2
7.10446e-147	0.658821	0.707	0.565	1.42089e-143	1	Myocd
6.6874e-141	-0.405252	0.444	0.642	1.33748e-137	1	Mest
7.80608e-140	-0.264752	0.493	0.655	1.56122e-136	1	Folr1
6.78595e-138	0.578759	1	0.979	1.35719e-134	1	Fos
1.36165e-136	-0.482723	0.594	0.719	2.72329e-133	1	Thbd
8.13775e-132	-0.289123	0.505	0.7	1.62755e-128	1	Abca8a
1.25713e-131	-0.471314	0.659	0.8	2.51427e-128	1	Akr1b8
7.98662e-131	0.461729	0.863	0.756	1.59732e-127	1	Ank2
3.44653e-130	0.520643	0.806	0.656	6.89307e-127	1	Cyp1b1
6.09203e-129	-0.322102	0.643	0.709	1.21841e-125	1	Alpl
2.24548e-125	-0.559067	0.461	0.652	4.49096e-122	1	Plac8
3.81166e-123	-0.480714	0.43	0.641	7.62331e-120	1	Scarb1
1.85849e-120	-0.454583	0.525	0.65	3.71698e-117	1	Cpz
6.05574e-120	0.590954	0.924	0.863	1.21115e-116	1	Col11a1
1.45785e-118	0.64127	0.755	0.666	2.9157e-115	1	4930523C07Rik
2.20995e-118	-0.277241	0.454	0.667	4.41989e-115	1	Tmem97
4.47117e-115	0.641752	0.95	0.896	8.94234e-112	1	Nupr1
5.28757e-114	-0.404251	0.581	0.757	1.05751e-110	1	Creb3l1
9.70126e-113	0.6634	0.73	0.557	1.94025e-109	1	Aspn
1.52179e-112	0.55332	0.743	0.589	3.04358e-109	1	1190002N15Rik
2.36347e-112	-0.540385	0.658	0.721	4.72695e-109	1	Col26a1
1.9321e-110	-0.358965	0.564	0.715	3.86421e-107	1	Adcy7
2.24377e-110	0.862784	0.778	0.648	4.48754e-107	1	Rasl11a
3.59639e-106	-0.441679	0.489	0.676	7.19279e-103	1	Emp1
4.7469e-106	-0.553297	0.798	0.895	9.4938e-103	1	Fbn1
2.82886e-105	-0.290615	0.531	0.696	5.65773e-102	1	Nrxn1
3.3465e-103	0.536961	0.677	0.505	6.693e-100	1	Lmcd1
1.38958e-100	-0.475424	0.634	0.759	2.77916e-97	1	Fbn2
8.00326e-99	0.483647	0.919	0.892	1.60065e-95	1	Cyb5a
6.62312e-98	-0.433444	0.598	0.682	1.32462e-94	1	Mmd2
1.7336e-96	-0.450126	0.614	0.777	3.46719e-93	1	Slc29a1
3.52891e-95	-0.42127	0.652	0.775	7.05782e-92	1	Hs6st2
4.11917e-95	-0.48595	0.833	0.908	8.23833e-92	1	2024-09-11
8.80355e-94	0.458617	0.818	0.741	1.76071e-90	1	Prss23
5.61871e-93	-0.433001	0.55	0.663	1.12374e-89	1	Clec3b
3.97947e-90	0.595243	0.919	0.855	7.95894e-87	1	Rgs2
9.31792e-90	-0.443278	0.428	0.605	1.86358e-86	1	Prc1
1.54208e-89	-0.260254	0.195	0.483	3.08415e-86	1	Ifi203
9.60453e-89	0.335122	0.734	0.661	1.92091e-85	1	Aoc3
8.22029e-88	-0.534767	0.705	0.8	1.64406e-84	1	Col5a1
4.67336e-86	-0.389472	0.626	0.702	9.34672e-83	1	Heyl
2.18927e-85	-0.39056	0.629	0.751	4.37855e-82	1	Ifi27l2a
2.78471e-85	-0.486197	0.41	0.581	5.56942e-82	1	Enpep
6.06109e-85	0.48656	0.975	0.95	1.21222e-81	1	Lmna
1.09951e-84	-0.289175	0.449	0.614	2.19903e-81	1	Bmp2
1.44902e-84	0.496327	0.842	0.775	2.89804e-81	1	Cxcl14
9.53244e-84	-0.542985	0.81	0.884	1.90649e-80	1	Ran
1.35048e-83	-0.397248	0.49	0.649	2.70096e-80	1	Trib2
1.02662e-82	0.426718	0.883	0.798	2.05325e-79	1	Thbs1
1.15153e-82	-0.346557	0.534	0.642	2.30306e-79	1	Wisp1
1.8779e-80	0.473369	0.984	0.95	3.75579e-77	1	Klf4
1.10356e-79	-0.444766	0.803	0.894	2.20713e-76	1	Gstm2
3.7348e-77	-0.443694	0.465	0.637	7.46961e-74	1	Pkdcc
6.828e-77	-0.495605	0.515	0.631	1.3656e-73	1	Pclaf
3.05193e-75	-0.436826	0.567	0.7	6.10385e-72	1	Fdxr
4.75692e-73	0.398293	0.974	0.928	9.51384e-70	1	Tuba1a
3.53128e-72	-0.374057	0.943	0.96	7.06256e-69	1	Hsp90b1
7.96678e-72	-0.37727	0.746	0.811	1.59336e-68	1	Ly6e
2.09533e-71	-0.289613	0.44	0.63	4.19066e-68	1	Gm10600
2.79507e-71	0.375506	0.777	0.636	5.59013e-68	1	Nnat
5.56049e-71	0.403407	0.763	0.641	1.1121e-67	1	Nr4a3
1.03223e-70	-0.254192	0.467	0.653	2.06446e-67	1	D10Wsu102e
1.16169e-70	-0.449962	0.656	0.729	2.32338e-67	1	Loxl2
3.8369e-69	0.401936	0.822	0.71	7.6738e-66	1	Mef2c
2.59171e-68	-0.517219	0.659	0.757	5.18343e-65	1	Matn2
1.1648e-67	0.347588	0.679	0.527	2.32961e-64	1	Cdc42ep3
5.37539e-67	-0.317211	0.548	0.676	1.07508e-63	1	Bhlhe40
8.90389e-67	0.630065	0.907	0.834	1.78078e-63	1	Nr4a2
1.38614e-66	-0.272795	0.67	0.766	2.77228e-63	1	Foxs1
2.09106e-66	-0.327789	0.449	0.566	4.18212e-63	1	Clca3a1
4.17525e-66	-0.416537	0.873	0.908	8.35049e-63	1	Maged2
9.52492e-66	-0.403631	0.317	0.525	1.90498e-62	1	Spon1
1.11794e-64	-0.418536	0.478	0.631	2.23587e-61	1	Me1
3.18049e-64	0.637739	0.789	0.701	6.36098e-61	1	Hspa1a
3.41718e-64	0.317161	0.754	0.66	6.83436e-61	1	Serpine1
1.26682e-63	-0.342312	0.576	0.691	2.53364e-60	1	Nt5dc2
1.95234e-63	0.397801	0.896	0.828	3.90468e-60	1	Col4a4
2.17448e-63	0.49746	0.878	0.835	4.34896e-60	1	Cited2
2.7565e-63	-0.306835	0.484	0.63	5.51299e-60	1	Kctd12
1.03762e-61	0.319152	1	0.999	2.07525e-58	1	Malat1
1.28154e-61	-0.471572	0.752	0.819	2.56308e-58	1	Itm2a
2.043e-61	-0.451159	0.663	0.776	4.086e-58	1	Nucks1
8.44165e-61	-0.309998	0.611	0.735	1.68833e-57	1	Actr3b
1.96933e-60	-0.389832	0.612	0.433	3.93866e-57	1	Cyp17a1
2.89566e-59	0.346881	0.892	0.871	5.79131e-56	1	Agt
8.7764e-59	-0.31885	0.475	0.643	1.75528e-55	1	Phlda1
1.19125e-58	-0.508409	0.809	0.868	2.38251e-55	1	Icam1
3.39468e-58	-0.351889	0.797	0.865	6.78936e-55	1	Emilin1
4.87084e-58	-0.476078	0.548	0.653	9.74168e-55	1	Mki67
9.33031e-58	0.362021	0.763	0.686	1.86606e-54	1	Vldlr
2.7811e-57	-0.507118	0.866	0.888	5.56219e-54	1	Hspd1
2.90616e-57	-0.253437	0.402	0.547	5.81232e-54	1	Lgi2
3.3871e-57	-0.416409	0.617	0.725	6.77419e-54	1	Spats2l
1.00139e-56	0.260068	0.711	0.638	2.00278e-53	1	Ndrg1
1.01906e-56	0.439952	0.963	0.964	2.03812e-53	1	Sox4
3.49306e-55	-0.383314	0.664	0.752	6.98611e-52	1	Pdgfrb
3.54738e-55	0.360681	0.996	0.972	7.09475e-52	1	Junb
2.00792e-54	-0.5031	0.655	0.727	4.01583e-51	1	Cd24a
3.35146e-54	0.286098	0.695	0.598	6.70291e-51	1	Egr3
1.37573e-53	0.453006	0.942	0.911	2.75147e-50	1	Dusp1
2.39961e-53	-0.283426	0.521	0.647	4.79922e-50	1	Tmem86a
3.92189e-53	0.308069	0.848	0.783	7.84378e-50	1	Ckb
9.80035e-52	0.410223	0.871	0.82	1.96007e-48	1	Txnip
5.84233e-51	-0.425759	0.572	0.694	1.16847e-47	1	Lpl
1.36092e-50	0.393452	0.751	0.673	2.72185e-47	1	Gm17056
2.30387e-50	-0.384678	0.557	0.693	4.60774e-47	1	Selenoh
6.95966e-50	-0.367963	0.769	0.829	1.39193e-46	1	Hk2
1.20629e-49	0.516757	0.886	0.858	2.41259e-46	1	Klf6
6.80334e-49	-0.394308	0.953	0.974	1.36067e-45	1	Ctsl
1.12236e-48	0.287376	0.994	0.99	2.24471e-45	1	Apoe
1.55534e-48	-0.254822	0.532	0.651	3.11067e-45	1	Lig1
1.07349e-47	-0.489726	0.326	0.483	2.14699e-44	1	Prlr
3.17964e-47	-0.31155	0.648	0.74	6.35928e-44	1	Srpx2
5.9393e-47	-0.386351	0.952	0.961	1.18786e-43	1	Hmgb1
2.94038e-46	-0.307074	0.376	0.512	5.88077e-43	1	Cenpa
1.82222e-45	-0.306247	0.433	0.603	3.64444e-42	1	Hmgn2
2.21186e-45	-0.298701	0.572	0.671	4.42372e-42	1	1500009L16Rik
2.53827e-45	0.267861	0.733	0.667	5.07653e-42	1	Fam46a
3.71246e-45	-0.413622	0.528	0.656	7.42491e-42	1	Tgfbi
1.39141e-43	-0.356592	0.516	0.612	2.78282e-40	1	Lmnb1
1.72508e-42	-0.541831	0.719	0.788	3.45016e-39	1	Fbln1
5.72384e-42	0.382734	0.94	0.903	1.14477e-38	1	Gadd45g
8.53494e-42	0.321173	0.64	0.551	1.70699e-38	1	Akr1c14
1.84158e-41	0.402698	0.918	0.87	3.68316e-38	1	Adamts1
8.20282e-41	-0.272114	0.769	0.816	1.64056e-37	1	Fscn1
9.53601e-40	-0.258775	0.487	0.585	1.9072e-36	1	Mcm3
9.99843e-40	0.504016	0.698	0.619	1.99969e-36	1	Cyr61
1.22837e-39	-0.361412	0.835	0.881	2.45673e-36	1	Gas6
1.48216e-39	0.321521	0.874	0.798	2.96432e-36	1	Gja1
3.72231e-37	-0.319651	0.681	0.758	7.44462e-34	1	Ranbp1
4.13674e-37	0.349843	0.817	0.758	8.27348e-34	1	Rasl11b
8.04039e-36	-0.260951	0.493	0.631	1.60808e-32	1	Smc4
3.61582e-35	-0.476032	0.825	0.882	7.23164e-32	1	Neat1
3.9559e-35	0.278465	0.685	0.596	7.91181e-32	1	Cd9
1.2029e-34	0.320469	0.923	0.901	2.40581e-31	1	Tacc1
1.35411e-34	-0.264595	0.651	0.759	2.70822e-31	1	Cdh11
1.97318e-34	0.356838	0.557	0.458	3.94636e-31	1	Pparg
3.48622e-34	-0.308989	0.542	0.621	6.97244e-31	1	Kctd14
1.1924e-32	-0.32036	0.434	0.546	2.3848e-29	1	Smc2
2.86513e-32	0.330958	0.712	0.664	5.73026e-29	1	Thbs4
8.18652e-32	-0.346789	0.558	0.591	1.6373e-28	1	Cenpe
3.37055e-31	-0.278358	0.629	0.712	6.7411e-28	1	Lrrc17
1.7794e-30	-0.483435	0.976	0.974	3.55881e-27	1	H2afz
6.09707e-29	-0.323009	0.585	0.65	1.21941e-25	1	Pank1
1.66895e-28	0.262311	0.836	0.775	3.3379e-25	1	Zfp36
4.08235e-28	-0.464814	0.777	0.855	8.16471e-25	1	Cebpd
6.06797e-28	0.26423	0.752	0.707	1.21359e-24	1	Rbp4
2.86779e-27	-0.572898	0.981	0.972	5.73558e-24	1	Col1a1
1.02649e-25	-0.462176	0.659	0.666	2.05297e-22	1	Dpt
1.0917e-25	-0.266594	0.573	0.643	2.1834e-22	1	Mid1ip1
1.36836e-25	-0.347781	0.736	0.79	2.73672e-22	1	Kcnq1ot1
1.13176e-23	-0.34892	0.669	0.737	2.26353e-20	1	Soat1
2.24639e-23	-0.326491	0.752	0.788	4.49278e-20	1	Fxyd6
3.11648e-23	0.305604	0.622	0.552	6.23296e-20	1	Gm26802
3.94745e-23	-0.253418	0.515	0.591	7.89491e-20	1	Ms4a4d
6.36308e-23	-0.293262	0.724	0.804	1.27262e-19	1	Col6a3
3.71654e-21	-0.301519	0.759	0.811	7.43307e-18	1	Hoxd9
7.08852e-21	-0.340554	0.459	0.502	1.4177e-17	1	Ptn
1.58519e-20	-0.312354	0.823	0.868	3.17039e-17	1	Ptch1
2.09139e-20	0.312216	0.201	0.287	4.18278e-17	1	Hba-a2
2.64619e-20	-0.261285	0.79	0.81	5.29238e-17	1	Wfdc1
7.84764e-20	0.273564	0.647	0.608	1.56953e-16	1	Fbxo32
1.07454e-19	-0.33647	0.915	0.929	2.14908e-16	1	Tuba1b
1.24808e-19	-0.320738	0.652	0.714	2.49616e-16	1	Tmem100
3.21692e-19	-0.250983	0.843	0.871	6.43384e-16	1	Slc9a3r2
1.181e-18	0.383512	0.652	0.607	2.36201e-15	1	Id1
1.55069e-18	-0.493079	0.571	0.592	3.10138e-15	1	Cenpf
6.05558e-18	-0.383341	0.482	0.521	1.21112e-14	1	Vcan
2.44656e-16	-0.263648	0.887	0.907	4.89311e-13	1	Igfbp4
3.4721e-16	-0.266044	0.539	0.616	6.94419e-13	1	Cd34
5.39171e-16	-0.340615	0.732	0.747	1.07834e-12	1	Loxl1
9.65904e-14	0.31725	0.599	0.62	1.93181e-10	1	Carmn
1.77691e-13	-0.400695	0.781	0.8	3.55382e-10	1	Sfrp1
2.05497e-13	-0.459129	0.483	0.571	4.10994e-10	1	Fdx1
1.82057e-12	0.501751	0.628	0.617	3.64113e-09	1	Hspa1b
2.07451e-11	0.37382	0.307	0.333	4.14902e-08	1	Hba-a1
2.9412e-11	-0.35429	0.723	0.719	5.8824e-08	1	Cxcl10
4.11144e-10	-0.273474	0.718	0.721	8.22289e-07	1	Crip1
4.68801e-10	-0.295486	0.688	0.695	9.37601e-07	1	Fabp5
1.03315e-09	-0.361163	0.956	0.95	2.06629e-06	1	Mfap4
3.59063e-09	-0.388864	1	0.999	7.18125e-06	1	Sparc
1.60988e-08	-0.304129	0.786	0.744	3.21976e-05	1	S100a6
7.56958e-08	-0.26982	0.535	0.558	0.000151392	1	Cks2
3.68589e-07	-0.306764	0.692	0.684	0.000737177	1	Lsp1
5.02735e-07	-0.36291	0.612	0.647	0.00100547	1	Wt1
2.68576e-06	-0.318665	0.595	0.614	0.00537152	1	Cdca8
6.39551e-06	-0.327052	0.65	0.653	0.012791	1	Ube2c
1.23607e-05	-0.256573	0.786	0.807	0.0247214	1	Timp3
3.00997e-05	0.257094	0.263	0.283	0.0601994	1	Hbb-bt
8.46682e-05	0.760635	0.324	0.29	0.169336	1	Hbb-bs
0.000721202	-0.264504	0.775	0.749	1	1	Cxcl1
0.000973	-0.464875	0.937	0.923	1	1	Gsn
0.00798186	-0.261634	0.297	0.371	1	1	Vcam1
0.00897106	-0.315787	0.709	0.67	1	1	Birc5
0	0.621928	0.901	0.682	0	2	Alpl
4.71073e-308	0.614513	0.911	0.798	9.42147e-305	2	Wfdc1
7.09425e-282	0.950116	0.97	0.853	1.41885e-278	2	Ptch1
9.39563e-265	0.683604	0.93	0.804	1.87913e-261	2	Bpgm
6.33591e-263	0.404014	0.86	0.704	1.26718e-259	2	D630033O11Rik
4.71813e-259	0.641735	0.893	0.678	9.43626e-256	2	6030408B16Rik
8.86873e-253	0.543952	0.933	0.773	1.77375e-249	2	Lamc3
6.32556e-252	0.627996	0.847	0.598	1.26511e-248	2	Mest
1.3775e-234	0.514383	0.879	0.675	2.755e-231	2	Heyl
2.9568e-212	0.413478	0.875	0.759	5.91359e-209	2	Colec11
1.78504e-206	0.464464	0.859	0.69	3.57008e-203	2	Thbd
2.88095e-202	0.472372	0.844	0.685	5.76189e-199	2	Adcy7
3.24447e-191	0.565389	0.908	0.747	6.48894e-188	2	Hs6st2
2.42363e-183	-1.01826	0.867	0.918	4.84726e-180	2	Sparcl1
2.5936e-181	0.529694	0.896	0.8	5.1872e-178	2	Pltp
1.852e-174	0.259417	0.776	0.592	3.704e-171	2	Cdh5
5.22087e-165	0.346544	0.847	0.61	1.04417e-161	2	Plac8
1.40311e-163	0.552211	0.884	0.768	2.80621e-160	2	Tgm2
1.79224e-161	0.49087	0.899	0.73	3.58448e-158	2	Fbn2
2.44276e-159	0.471705	0.97	0.835	4.88552e-156	2	Lama2
2.20972e-158	0.425098	0.868	0.733	4.41943e-155	2	Tmem119
4.90148e-158	0.588868	0.978	0.897	9.80297e-155	2	Maged2
1.13567e-157	0.474152	0.944	0.767	2.27133e-154	2	AU020206
3.03886e-155	0.59727	0.842	0.727	6.07771e-152	2	Hhip
1.41601e-152	0.391888	0.872	0.712	2.83202e-149	2	Stox2
5.16984e-150	0.420232	0.888	0.723	1.03397e-146	2	Creb3l1
1.06988e-144	0.430352	0.995	0.968	2.13977e-141	2	Col4a1
4.25033e-144	0.424191	0.987	0.938	8.50066e-141	2	Col6a2
1.83914e-143	-0.80863	0.667	0.781	3.67829e-140	2	Fhl1
8.26162e-141	0.324082	0.915	0.772	1.65232e-137	2	Akr1b8
4.17081e-138	0.44055	0.921	0.803	8.34163e-135	2	Gpc3
1.09038e-129	0.341637	0.777	0.542	2.18077e-126	2	Enpep
4.41009e-128	-0.944839	0.623	0.816	8.82017e-125	2	Sfrp1
1.85386e-125	-1.28417	0.627	0.792	3.70771e-122	2	Id2
3.37656e-125	-0.847836	0.728	0.836	6.75312e-122	2	Txnip
1.96683e-119	0.395947	0.97	0.876	3.93365e-116	2	Gstm2
1.6082e-116	0.353071	0.916	0.74	3.21639e-113	2	Olfml3
6.11378e-113	-0.261615	0.817	0.689	1.22276e-109	2	Acsbg1
4.58475e-111	0.375384	0.659	0.493	9.16949e-108	2	Ccnd1
3.41235e-108	0.339657	0.748	0.568	6.8247e-105	2	Mt3
2.23964e-106	-0.823377	0.978	0.973	4.47928e-103	2	Tmsb4x
5.35226e-105	0.372028	0.991	0.944	1.07045e-101	2	Cygb
5.05504e-104	0.346556	0.992	0.935	1.01101e-100	2	Col4a2
7.05032e-104	0.283394	0.762	0.617	1.41006e-100	2	Wisp1
1.42757e-102	0.290213	0.856	0.753	2.85515e-99	2	Glipr2
6.22149e-100	0.358072	0.974	0.893	1.2443e-96	2	2024-09-11
8.66981e-100	-0.663634	1	0.999	1.73396e-96	2	Malat1
7.33591e-99	0.284242	0.818	0.678	1.46718e-95	2	Prss35
1.42288e-98	0.422741	0.867	0.691	2.84576e-95	2	Tmem100
2.55887e-98	-0.397975	0.439	0.678	5.11775e-95	2	Lox
1.62144e-96	-0.446238	0.997	0.986	3.24289e-93	2	Cst3
9.89322e-96	0.289079	0.832	0.622	1.97864e-92	2	Phgdh
1.39749e-94	0.282032	0.97	0.867	2.79498e-91	2	Ran
4.98942e-94	0.265378	0.859	0.746	9.97883e-91	2	Foxs1
8.46389e-94	0.397566	0.954	0.883	1.69278e-90	2	Ccnd2
1.05563e-90	-0.538747	0.469	0.658	2.11125e-87	2	Ncam1
4.97695e-90	-0.575538	0.839	0.868	9.95389e-87	2	Chchd10
3.47691e-89	0.391664	0.701	0.498	6.95382e-86	2	Vcan
1.72922e-87	0.352613	0.843	0.73	3.45844e-84	2	Nhsl2
2.60294e-87	-0.931138	0.856	0.888	5.20588e-84	2	Pim1
1.95775e-85	-0.585363	0.685	0.794	3.91551e-82	2	Fxyd6
1.67752e-84	0.289754	0.899	0.802	3.35503e-81	2	Fscn1
6.02587e-84	0.313654	0.982	0.912	1.20517e-80	2	Eva1b
8.45819e-83	-0.83913	0.509	0.656	1.69164e-79	2	Wt1
6.68929e-78	-0.863284	0.959	0.932	1.33786e-74	2	Ogn
8.68045e-77	0.267666	0.969	0.878	1.73609e-73	2	Hspd1
2.08578e-75	-0.882397	0.441	0.589	4.17157e-72	2	Aspn
7.11579e-74	-0.642358	0.836	0.877	1.42316e-70	2	Foxo1
8.77606e-74	-0.682576	0.719	0.815	1.75521e-70	2	Gja1
1.15736e-73	-0.283944	0.76	0.604	2.31473e-70	2	Stc1
1.19857e-73	-0.652527	0.98	0.98	2.39714e-70	2	Fosb
1.096e-71	-0.573683	0.548	0.684	2.192e-68	2	Cyp1b1
1.95413e-70	0.328151	0.67	0.542	3.90825e-67	2	Clca3a1
4.0601e-70	-0.793	0.975	0.956	8.12019e-67	2	Rarres2
3.19003e-69	-0.938884	0.588	0.723	6.38005e-66	2	Hspa1a
3.24017e-69	0.250284	0.998	0.98	6.48034e-66	2	Lgals1
1.69892e-65	-0.453556	0.543	0.703	3.39783e-62	2	Cav1
7.67809e-65	-0.850267	0.799	0.845	1.53562e-61	2	Map1b
4.94513e-64	-0.786281	0.515	0.647	9.89026e-61	2	Hspb1
2.30423e-63	0.281135	0.819	0.712	4.60846e-60	2	Loxl2
5.40297e-63	-0.357645	0.853	0.741	1.08059e-59	2	Col15a1
5.51426e-63	0.264866	0.876	0.821	1.10285e-59	2	Fblim1
1.35023e-60	-0.92543	0.939	0.939	2.70045e-57	2	Csrp1
1.95833e-60	-0.527716	0.862	0.861	3.91666e-57	2	Ldhb
4.13818e-60	-0.787821	0.752	0.787	8.27635e-57	2	Cxcl12
7.02866e-60	0.365859	0.907	0.772	1.40573e-56	2	Kcnq1ot1
7.32883e-59	-0.914249	0.866	0.877	1.46577e-55	2	Neat1
2.08324e-57	-0.256054	0.638	0.667	4.16648e-54	2	Cilp
1.40051e-55	-0.503243	0.453	0.596	2.80102e-52	2	Gata6
1.41623e-55	-0.693862	0.937	0.946	2.83245e-52	2	Serping1
3.74237e-55	-0.258415	0.693	0.788	7.48473e-52	2	Crip2
1.37734e-54	-0.3345	0.59	0.666	2.75468e-51	2	Mustn1
4.3472e-54	-0.517696	0.564	0.703	8.6944e-51	2	Itga1
9.40628e-54	-0.583981	0.783	0.814	1.88126e-50	2	Ccdc80
9.60367e-54	-0.382317	0.492	0.662	1.92073e-50	2	Prrx1
2.26411e-53	-0.476462	0.585	0.655	4.52822e-50	2	Foxp2
1.11331e-52	-0.350488	0.421	0.589	2.22662e-49	2	Lbp
4.55532e-51	-0.783546	0.897	0.916	9.11064e-48	2	Dusp1
5.53e-49	-0.495142	0.533	0.669	1.106e-45	2	Nexn
4.88467e-48	-0.437644	0.974	0.971	9.76933e-45	2	Ctsl
7.24898e-48	0.255193	0.841	0.701	1.4498e-44	2	Spats2l
4.39646e-47	-0.800422	0.947	0.936	8.79293e-44	2	Serpinf1
6.31521e-46	-0.900283	0.998	0.994	1.26304e-42	2	Myl6
3.4946e-45	-0.400502	0.636	0.749	6.98921e-42	2	Rras
4.0698e-45	-0.567741	0.987	0.981	8.1396e-42	2	Fos
2.10542e-42	0.253843	0.898	0.763	4.21084e-39	2	Manf
3.44643e-42	-0.496759	0.533	0.65	6.89286e-39	2	Clec1a
2.13346e-41	-0.397499	0.312	0.466	4.26691e-38	2	Cyp17a1
8.24965e-41	-0.416362	0.686	0.759	1.64993e-37	2	Cxcl1
7.8263e-40	-0.459939	0.604	0.682	1.56526e-36	2	4930523C07Rik
6.00204e-39	-0.502287	0.92	0.929	1.20041e-35	2	Inha
6.0745e-39	-0.485865	0.929	0.926	1.2149e-35	2	Htra1
1.43599e-38	-0.405438	0.642	0.722	2.87197e-35	2	Sdc4
5.65901e-38	-0.440323	0.896	0.895	1.1318e-34	2	Cyb5a
1.38684e-37	-0.677142	0.851	0.88	2.77369e-34	2	Kcnk2
1.93424e-37	-0.425191	0.896	0.899	3.86848e-34	2	Selenop
3.81184e-36	-0.386708	0.752	0.656	7.62368e-33	2	Dpt
3.8329e-36	0.251242	0.716	0.627	7.66579e-33	2	Mid1ip1
4.19305e-36	-0.607518	0.88	0.874	8.38611e-33	2	Csrp2
2.00625e-35	-0.311947	0.548	0.651	4.0125e-32	2	Sorbs1
2.76459e-34	-0.290143	0.326	0.482	5.52918e-31	2	Meis2
3.27062e-34	-0.55576	0.747	0.796	6.54123e-31	2	Gm26532
2.28674e-33	-0.580214	0.827	0.841	4.57347e-30	2	Cited2
3.51838e-33	-0.304046	0.376	0.486	7.03676e-30	2	Pdgfrl
4.11209e-33	-0.994063	0.542	0.613	8.22418e-30	2	Meg3
6.84026e-33	-0.514882	0.666	0.697	1.36805e-29	2	Vldlr
8.4601e-33	-0.335755	0.507	0.592	1.69202e-29	2	Psd
1.81195e-32	-0.743599	0.884	0.901	3.6239e-29	2	Ier3
9.50869e-32	-0.460186	0.715	0.752	1.90174e-28	2	Prss23
1.34059e-31	-0.387143	0.669	0.578	2.68117e-28	2	Prc1
2.01534e-31	-0.309829	0.619	0.688	4.03068e-28	2	Gm17056
2.272e-30	-0.456236	0.674	0.675	4.544e-27	2	Fam46a
4.25535e-30	-0.30668	0.466	0.6	8.51069e-27	2	Cenpe
5.67571e-30	-0.280841	0.628	0.698	1.13514e-26	2	Hist1h1c
1.23222e-29	-0.422884	0.523	0.654	2.46444e-26	2	Tgfbi
2.98702e-29	-0.668286	0.558	0.624	5.97403e-26	2	Gas1
3.83563e-29	-0.273406	0.613	0.674	7.67127e-26	2	Aoc3
3.88617e-29	-0.250238	0.355	0.467	7.77235e-26	2	Pde3a
1.13229e-28	-0.319662	0.59	0.683	2.26459e-25	2	Birc5
1.67616e-28	-0.467942	0.516	0.586	3.35231e-25	2	Filip1l
1.04532e-27	-0.634098	0.879	0.904	2.09064e-24	2	Nupr1
1.19924e-27	-0.286809	0.38	0.51	2.39848e-24	2	Tgfb2
2.87897e-27	-0.589008	0.887	0.896	5.75794e-24	2	Socs3
4.99028e-27	-0.497629	1	0.999	9.98055e-24	2	Sparc
1.29301e-26	-0.457157	0.824	0.857	2.58602e-23	2	Nfkbia
7.1803e-26	-0.54205	0.554	0.625	1.43606e-22	2	Hspa1b
1.92819e-24	-0.291676	0.368	0.49	3.85638e-21	2	Hist1h1b
3.15765e-24	-0.382345	0.517	0.592	6.3153e-21	2	Pik3r1
4.14342e-24	-0.286535	0.518	0.628	8.28685e-21	2	Carmn
9.79357e-24	-0.488761	0.961	0.952	1.95871e-20	2	Lmna
1.33415e-23	-0.294465	0.737	0.741	2.66831e-20	2	Mmp11
3.45387e-23	-0.419414	0.504	0.623	6.90774e-20	2	Id1
1.17784e-22	-0.328496	0.409	0.506	2.35568e-19	2	Ptn
2.61228e-22	-0.5181	0.782	0.783	5.22456e-19	2	Gem
3.94849e-22	-0.33376	0.512	0.59	7.89699e-19	2	Ms4a4d
5.87429e-22	-0.552363	0.865	0.826	1.17486e-18	2	Grb14
3.33402e-21	-0.484334	0.794	0.839	6.66804e-18	2	Col4a4
8.25228e-21	-0.438158	0.764	0.801	1.65046e-17	2	Ugdh
9.34832e-21	-0.330885	0.993	0.991	1.86966e-17	2	Itih5
1.62349e-20	-0.340216	0.89	0.853	3.24698e-17	2	Dek
2.01742e-20	-0.255651	0.674	0.639	4.03484e-17	2	Spon2
2.1684e-20	-0.394305	0.978	0.974	4.33681e-17	2	Junb
2.3053e-20	-0.252898	0.766	0.715	4.6106e-17	2	Cd24a
2.35827e-20	-0.807871	0.664	0.691	4.71655e-17	2	Lmod1
4.6533e-20	-1.03045	0.978	0.95	9.3066e-17	2	Dcn
5.26364e-20	-0.283743	0.562	0.652	1.05273e-16	2	Zdbf2
6.83484e-20	-0.957953	0.749	0.667	1.36697e-16	2	Aldh1a1
9.27877e-20	-0.345014	0.789	0.819	1.85575e-16	2	Socs2
6.09392e-19	-0.491215	0.814	0.783	1.21878e-15	2	Palld
7.07324e-19	-0.268759	0.414	0.465	1.41465e-15	2	Myoc
8.69539e-19	-0.265028	0.424	0.535	1.73908e-15	2	Pdlim3
9.17654e-19	-0.384996	0.64	0.725	1.83531e-15	2	Mafb
1.28755e-18	-0.62592	0.94	0.949	2.5751e-15	2	Gadd45b
1.55983e-18	-0.442753	0.969	0.964	3.11965e-15	2	Sox4
2.21331e-18	-0.332178	0.328	0.434	4.42661e-15	2	Id4
2.40542e-18	-0.541295	0.901	0.875	4.81084e-15	2	Lpp
3.80886e-18	-0.371241	0.728	0.644	7.61772e-15	2	Clec3b
4.73185e-18	-0.299026	0.546	0.61	9.4637e-15	2	Abi3bp
6.5586e-18	-0.385521	0.77	0.808	1.31172e-14	2	Serpine2
6.79875e-18	-0.358892	0.581	0.608	1.35975e-14	2	Metrnl
1.81131e-17	-0.525967	0.7	0.721	3.62261e-14	2	Cxcl10
1.4355e-16	-0.444785	0.79	0.78	2.87099e-13	2	Sat1
1.80886e-16	-0.257731	0.585	0.642	3.61771e-13	2	S100a16
2.07403e-16	-0.320763	0.752	0.769	4.14806e-13	2	Ank2
4.03204e-16	-0.559159	0.913	0.885	8.06409e-13	2	Plpp3
6.53604e-16	-0.636312	0.75	0.792	1.30721e-12	2	Mfap5
9.50167e-16	-0.268192	0.507	0.542	1.90033e-12	2	Ramp1
5.86625e-15	-0.441249	0.797	0.809	1.17325e-11	2	Thbs1
1.04108e-14	-0.283689	0.4	0.489	2.08216e-11	2	Cdkn1c
1.42308e-14	-0.699564	0.655	0.704	2.84617e-11	2	Top2a
1.12129e-13	-0.306114	0.338	0.42	2.24258e-10	2	Penk
1.47083e-13	-0.476988	0.748	0.752	2.94165e-10	2	Ccdc3
1.65e-13	-0.277548	0.657	0.696	3.3e-10	2	Iigp1
1.66646e-13	-0.285813	0.613	0.646	3.33293e-10	2	Gng11
1.80622e-13	-0.378779	0.775	0.765	3.61244e-10	2	Hjurp
1.90804e-13	-0.389261	0.704	0.682	3.81607e-10	2	Gadd45a
6.32482e-13	-0.264399	0.634	0.674	1.26496e-09	2	Serpine1
7.15125e-13	-1.00291	0.54	0.448	1.43025e-09	2	Cyp11a1
7.59783e-13	-0.49715	0.569	0.604	1.51957e-09	2	Pcp4l1
9.88433e-13	-0.459941	0.791	0.788	1.97687e-09	2	Pnp
1.89699e-12	-1.21091	0.962	0.929	3.79399e-09	2	Tpm2
2.62275e-12	-0.404746	0.72	0.725	5.24551e-09	2	Errfi1
3.34222e-12	-0.457846	0.595	0.613	6.68444e-09	2	Tnnt2
5.88825e-12	-0.35126	0.578	0.615	1.17765e-08	2	Tpx2
6.1126e-12	-0.365401	0.475	0.528	1.22252e-08	2	Lmcd1
7.31404e-12	-0.505993	0.644	0.664	1.46281e-08	2	Rasl11a
2.64724e-11	-0.323059	0.759	0.739	5.29447e-08	2	Cdkn1a
2.66015e-11	-0.534774	0.907	0.907	5.32029e-08	2	Gadd45g
6.53987e-11	-0.430857	0.663	0.682	1.30797e-07	2	Lpl
1.00361e-10	-0.3298	0.786	0.781	2.00722e-07	2	Zfp36
1.06766e-10	-0.293633	0.574	0.609	2.13531e-07	2	1190002N15Rik
2.8257e-10	-0.31136	0.561	0.617	5.65141e-07	2	Cdca8
4.23085e-10	-0.264241	0.556	0.491	8.4617e-07	2	Cenpa
1.84238e-09	-0.613405	0.858	0.847	3.68476e-06	2	Clu
2.41024e-09	-0.355433	0.783	0.759	4.82047e-06	2	Arl6ip1
2.9836e-09	-0.282952	0.58	0.608	5.9672e-06	2	Cd9
3.10967e-09	-0.262616	0.738	0.736	6.21935e-06	2	Rhoj
8.24704e-09	-0.327703	0.956	0.917	1.64941e-05	2	Tubb4b
2.06644e-08	-0.835368	0.697	0.697	4.13288e-05	2	Fbxl22
2.24525e-08	-0.409827	0.662	0.64	4.4905e-05	2	Mki67
3.85974e-08	-0.416154	0.664	0.614	7.71947e-05	2	Pclaf
4.99868e-08	-0.48408	0.956	0.953	9.99736e-05	2	Klf4
1.6065e-07	-0.534455	0.882	0.838	0.000321299	2	Stmn1
1.41028e-06	-0.41055	0.885	0.846	0.00282056	2	Aebp1
1.48081e-06	-0.263977	0.639	0.643	0.00296161	2	Tnxb
1.77492e-06	-0.657879	0.919	0.862	0.00354984	2	Lum
2.32548e-06	-0.37983	0.756	0.671	0.00465096	2	Ntrk2
3.92482e-06	-0.333778	0.806	0.806	0.00784963	2	Hoxd9
4.59285e-06	-0.302707	0.597	0.628	0.0091857	2	Phlda1
6.77864e-06	-1.07285	0.971	0.954	0.0135573	2	Myl9
7.43915e-06	-0.354375	0.769	0.771	0.0148783	2	Ier5
1.39544e-05	-0.280004	0.461	0.507	0.0279088	2	Spon1
2.46987e-05	-0.254969	0.749	0.749	0.0493973	2	S100a6
2.59838e-05	-0.331165	0.89	0.862	0.0519676	2	Mt1
2.77245e-05	-0.408906	0.598	0.586	0.0554489	2	Sh3bgr
3.07972e-05	-0.379611	0.653	0.553	0.0615943	2	Fdx1
7.99295e-05	-0.269478	0.646	0.645	0.159859	2	Abca1
0.000104295	-0.275045	0.754	0.765	0.20859	2	Col5a2
0.00012269	-0.252202	0.768	0.717	0.24538	2	H2-K1
0.000134905	-0.586623	0.599	0.595	0.26981	2	Ednrb
0.000146645	-0.358709	0.997	0.99	0.29329	2	Apoe
0.000206585	-0.436537	0.956	0.921	0.41317	2	Flna
0.000291568	-0.285417	0.9	0.868	0.583137	2	Cavin3
0.000513721	-0.304703	0.632	0.655	1	2	Ube2c
0.0012352	-0.605534	0.99	0.962	1	2	Mgp
0.001455	0.353378	0.603	0.656	1	2	Nnat
0.001598	-0.479449	0.793	0.781	1	2	Cxcl14
0.00216089	-0.543223	0.819	0.777	1	2	Fbln1
0.00569597	-0.365543	0.639	0.626	1	2	Cyr61
0.00659761	-0.26053	0.923	0.886	1	2	Selenom
8.24478e-305	1.00601	0.998	0.98	1.64896e-301	3	Fos
9.20218e-265	0.803744	0.829	0.665	1.84044e-261	3	Nrxn1
9.77446e-263	1.13011	0.995	0.948	1.95489e-259	3	Dcn
2.24699e-254	1.32437	0.951	0.837	4.49398e-251	3	Cebpd
5.00118e-254	0.878022	0.999	0.972	1.00024e-250	3	Junb
1.81302e-213	-1.00268	0.951	0.984	3.62603e-210	3	Lgals1
2.54162e-210	0.640707	0.998	0.981	5.08325e-207	3	Cfh
2.66774e-197	1.08227	0.951	0.889	5.33547e-194	3	Socs3
7.42323e-190	1.5387	0.928	0.858	1.48465e-186	3	Mt1
5.56812e-181	1.13469	0.928	0.855	1.11362e-177	3	Icam1
2.15235e-169	0.888321	0.876	0.775	4.30471e-166	3	Cxcl12
5.4392e-167	0.317983	0.821	0.742	1.08784e-163	3	Cbfa2t3
6.93947e-167	0.70413	0.944	0.86	1.38789e-163	3	Lum
1.11541e-164	-1.17516	0.983	0.996	2.23083e-161	3	Myl6
1.20412e-164	0.669191	0.968	0.918	2.40823e-161	3	Bicc1
1.70704e-159	0.502179	0.767	0.643	3.41407e-156	3	Ebf1
8.24858e-155	-1.00842	0.848	0.945	1.64972e-151	3	Serpinf1
9.73762e-149	0.516434	0.848	0.762	1.94752e-145	3	Colec11
2.92971e-145	0.707544	0.998	0.978	5.85941e-142	3	Fosb
1.85127e-140	0.75599	0.878	0.773	3.70254e-137	3	Zfp36
2.31622e-140	-2.76318	0.72	0.849	4.63244e-137	3	Tagln
7.01365e-140	0.489411	0.998	0.991	1.40273e-136	3	Itih5
1.50302e-137	0.623488	0.939	0.871	3.00605e-134	3	Htra3
1.39584e-136	0.814519	0.945	0.911	2.79169e-133	3	Dusp1
9.88615e-135	-0.533374	0.958	0.986	1.97723e-131	3	Gapdh
7.38465e-133	0.603265	0.982	0.948	1.47693e-129	3	Mfap4
5.53173e-131	-0.37864	0.445	0.756	1.10635e-127	3	Sh3bgrl3
8.32097e-131	-0.395095	0.44	0.71	1.66419e-127	3	Fbln5
6.91939e-125	0.824728	0.982	0.951	1.38388e-121	3	Klf4
2.83723e-124	0.573255	0.777	0.66	5.67446e-121	3	Serpine1
1.40142e-123	-0.270757	0.397	0.668	2.80285e-120	3	Tmem97
2.2167e-123	-0.866553	0.464	0.66	4.4334e-120	3	Wt1
6.59959e-121	-0.63602	0.721	0.891	1.31992e-117	3	Gas6
1.75291e-119	-2.54585	0.817	0.905	3.50583e-116	3	Acta2
4.79843e-116	-0.640755	0.992	0.996	9.59686e-113	3	Col1a2
7.22992e-116	-0.265634	0.382	0.636	1.44598e-112	3	Rangap1
2.11432e-114	0.651395	0.846	0.76	4.22864e-111	3	Gm12216
2.2686e-113	-0.51888	0.898	0.964	4.53721e-110	3	Hsp90b1
5.66559e-112	-0.650176	0.633	0.784	1.13312e-108	3	Fhl1
4.14872e-111	0.580551	0.992	0.991	8.29745e-108	3	Apoe
4.47619e-111	-0.492458	0.5	0.707	8.95239e-108	3	Cav1
2.9551e-109	-0.251007	0.212	0.526	5.9102e-106	3	Rspo3
3.34031e-109	-0.610178	0.708	0.875	6.68062e-106	3	Ldhb
4.09016e-109	-0.298345	0.723	0.827	8.18032e-106	3	Ucp2
8.31321e-107	-1.49427	0.905	0.961	1.66264e-103	3	Myl9
3.17552e-106	0.669245	0.889	0.83	6.35103e-103	3	Adamts4
8.92996e-106	-0.681227	0.832	0.921	1.78599e-102	3	Pcolce
6.29406e-105	-0.292158	0.57	0.766	1.25881e-101	3	Pdlim4
5.41268e-104	-0.80343	0.839	0.933	1.08254e-100	3	Flna
7.88738e-101	0.558744	0.901	0.871	1.57748e-97	3	Agt
4.00334e-100	-1.35868	0.85	0.957	8.00669e-97	3	Mylk
1.74787e-98	-0.617179	0.78	0.886	3.49575e-95	3	Ran
4.76278e-98	-0.434746	0.593	0.778	9.52556e-95	3	Smtn
6.25886e-97	-0.388553	0.41	0.663	1.25177e-93	3	Phgdh
4.58323e-95	-0.522694	0.404	0.619	9.16645e-92	3	Pcp4l1
4.78765e-95	-0.785476	0.676	0.858	9.5753e-92	3	Nr4a2
1.74936e-93	-0.956953	0.868	0.946	3.49871e-90	3	Csrp1
7.3436e-90	0.58011	0.865	0.774	1.46872e-86	3	Cxcl14
1.39942e-89	-0.681812	0.998	0.999	2.79884e-86	3	Sparc
1.83712e-89	0.756099	0.963	0.946	3.67425e-86	3	Gadd45b
2.43895e-89	-0.475812	0.667	0.795	4.8779e-86	3	Fxyd6
4.27973e-89	-0.582712	0.533	0.705	8.55946e-86	3	Prss35
4.27494e-88	-0.512116	0.433	0.628	8.54988e-85	3	Tnnt2
3.04542e-87	0.738855	0.891	0.861	6.09083e-84	3	Fgl2
1.78298e-86	-0.825559	0.619	0.806	3.56595e-83	3	Ckb
4.96624e-86	-0.321894	0.494	0.675	9.93248e-83	3	Mustn1
2.79687e-85	0.644282	0.806	0.704	5.59374e-82	3	Egr2
4.80089e-85	-0.25035	0.331	0.554	9.60178e-82	3	Tnc
5.22906e-84	-0.938688	0.522	0.713	1.04581e-80	3	Fbxl22
9.2812e-84	0.870892	0.739	0.718	1.85624e-80	3	Cxcl10
2.52253e-81	-0.558466	0.769	0.897	5.04507e-78	3	Hspd1
5.91688e-81	-0.538563	0.774	0.895	1.18338e-77	3	Gstm2
9.50613e-81	-0.48807	0.924	0.964	1.90123e-77	3	Hmgb1
1.77485e-80	-0.553814	0.409	0.613	3.54971e-77	3	Ednrb
1.98959e-80	-0.502978	0.57	0.783	3.97919e-77	3	Nucks1
7.07586e-80	0.250071	0.999	0.994	1.41517e-76	3	Igfbp7
1.63371e-79	0.440134	0.844	0.775	3.26742e-76	3	Fbln1
1.0421e-78	-0.426297	0.557	0.768	2.08419e-75	3	Ranbp1
1.54115e-77	0.431419	0.66	0.502	3.08231e-74	3	Gucy1b1
2.35304e-77	-0.52472	0.611	0.797	4.70607e-74	3	Cnn2
3.70226e-77	-0.475695	0.5	0.655	7.40452e-74	3	Mki67
1.51249e-75	-0.27639	0.629	0.793	3.02497e-72	3	Tgm2
2.47551e-75	0.53612	0.812	0.747	4.95102e-72	3	Cxcl1
3.92073e-72	0.419397	0.989	0.978	7.84145e-69	3	Ifitm3
5.97922e-72	0.628997	0.814	0.775	1.19584e-68	3	Nrp1
6.82366e-70	-0.43668	0.807	0.913	1.36473e-66	3	Maged2
2.30749e-68	-0.465555	0.627	0.764	4.61499e-65	3	Ccdc3
2.14521e-67	0.574068	0.889	0.879	4.29043e-64	3	Irf1
2.2509e-67	-0.376995	0.434	0.618	4.50181e-64	3	Lmnb1
2.97028e-67	0.339405	0.992	0.962	5.94057e-64	3	Mgp
3.62444e-67	-0.786163	0.747	0.85	7.24889e-64	3	Map1b
5.98046e-67	-0.285521	0.35	0.574	1.19609e-63	3	Dctpp1
6.59737e-67	0.458562	0.806	0.741	1.31947e-63	3	Matn2
7.53319e-67	-0.871503	0.978	0.984	1.50664e-63	3	Tpm1
1.27538e-64	-0.466052	0.753	0.88	2.55076e-61	3	Col11a1
1.4796e-64	0.524114	0.843	0.734	2.95919e-61	3	Osr2
1.81689e-64	-0.340566	0.585	0.737	3.63378e-61	3	Adamts9
5.21846e-64	0.383255	0.98	0.945	1.04369e-60	3	Cygb
7.18549e-63	-0.281262	0.388	0.604	1.4371e-59	3	Pik3r1
7.89293e-63	-1.39137	0.885	0.936	1.57859e-59	3	Tpm2
1.15782e-60	-0.272976	0.575	0.721	2.31564e-57	3	Isyna1
2.31483e-60	0.376339	0.916	0.897	4.62966e-57	3	Selenop
7.94024e-60	0.508862	0.849	0.82	1.58805e-56	3	Hk2
1.53185e-56	0.46478	0.89	0.778	3.06369e-53	3	Fn1
1.79552e-56	-0.37818	0.896	0.954	3.59105e-53	3	Mdk
6.92925e-56	-0.280887	0.323	0.491	1.38585e-52	3	Pdgfrl
7.18048e-56	-0.31165	0.428	0.603	1.4361e-52	3	Cenpe
8.51455e-56	-0.50618	0.686	0.843	1.70291e-52	3	Grb14
1.06104e-55	0.726059	0.874	0.859	2.12207e-52	3	Klf6
1.26962e-55	-0.367316	0.555	0.644	2.53924e-52	3	Cpz
3.81193e-55	-0.525468	0.745	0.887	7.62386e-52	3	Csrp2
6.2039e-55	-0.649342	0.791	0.853	1.24078e-51	3	Clu
9.03642e-55	-0.281492	0.419	0.623	1.80728e-51	3	Cd9
1.72461e-54	-0.464772	0.768	0.901	3.44921e-51	3	Selenom
2.97498e-54	-0.439928	0.458	0.599	5.94996e-51	3	Sh3bgr
9.026e-54	-0.360791	0.597	0.751	1.8052e-50	3	Hhip
1.57044e-53	-0.312094	0.516	0.706	3.14089e-50	3	Itga1
1.83982e-53	-0.347131	0.908	0.956	3.67965e-50	3	Mif
2.40064e-53	0.370331	1	0.999	4.80127e-50	3	Malat1
2.5392e-53	-0.287176	0.549	0.708	5.07839e-50	3	Fabp5
7.19147e-53	0.459416	0.609	0.519	1.43829e-49	3	Tnfsf9
8.4379e-53	-0.298059	0.802	0.919	1.68758e-49	3	Ywhaq
9.32137e-53	-0.314171	0.729	0.815	1.86427e-49	3	Odc1
1.27547e-52	-0.509072	0.55	0.667	2.55094e-49	3	Nexn
1.4805e-52	0.296825	0.984	0.983	2.96101e-49	3	Akr1cl
1.57371e-52	0.397537	0.85	0.776	3.14742e-49	3	AU020206
2.12946e-52	0.572092	0.566	0.482	4.25893e-49	3	Lrat
6.17901e-52	-0.356144	0.483	0.624	1.2358e-48	3	Tpx2
1.42214e-50	0.636255	0.811	0.708	2.84428e-47	3	Mafb
1.2128e-48	0.554629	0.742	0.732	2.42561e-45	3	Nfkbiz
5.57963e-48	0.9626	0.155	0.307	1.11593e-44	3	Hbb-bs
1.04132e-47	-0.449531	0.587	0.744	2.08263e-44	3	Soat1
2.13184e-47	-0.577476	0.686	0.809	4.26369e-44	3	Sfrp1
8.28936e-46	-0.381315	0.615	0.8	1.65787e-42	3	Kcnq1ot1
8.90591e-46	-0.278006	0.319	0.499	1.78118e-42	3	Slc26a7
2.22678e-45	0.288759	0.964	0.924	4.45357e-42	3	Mmp2
2.26518e-45	0.37161	0.951	0.927	4.53037e-42	3	Pmepa1
4.39251e-45	-0.367248	0.317	0.514	8.78502e-42	3	Ptn
1.1176e-44	-0.335365	0.49	0.624	2.2352e-41	3	Kctd14
6.55807e-44	-0.277751	0.451	0.597	1.31161e-40	3	Psd
6.67431e-44	-0.340879	0.533	0.662	1.33486e-40	3	Nnat
3.71906e-43	-0.483812	0.521	0.628	7.43811e-40	3	Pclaf
3.89886e-43	-0.434143	0.459	0.595	7.79772e-40	3	Gata6
4.1968e-43	0.540212	0.945	0.923	8.39359e-40	3	Klf2
9.48669e-43	0.53911	0.744	0.654	1.89734e-39	3	Rasl11a
1.34005e-42	-0.308431	0.501	0.654	2.6801e-39	3	Ncam1
2.04581e-42	-0.324258	0.757	0.813	4.09163e-39	3	Wfdc1
6.53697e-42	-1.95821	0.67	0.753	1.30739e-38	3	Myh11
2.47266e-40	-0.340423	0.848	0.893	4.94532e-37	3	Ccnd2
3.21491e-40	-0.332189	0.422	0.6	6.42981e-37	3	Hmgn2
1.14938e-39	0.410237	0.637	0.552	2.29876e-36	3	Gm26802
1.85749e-39	-0.360725	0.551	0.69	3.71498e-36	3	Selenoh
6.54947e-39	0.356337	0.563	0.499	1.30989e-35	3	Dio3
1.11124e-38	-0.396289	0.738	0.844	2.22248e-35	3	Col4a4
5.20139e-38	-0.421186	0.399	0.535	1.04028e-34	3	Lmcd1
7.83565e-38	0.315021	0.953	0.935	1.56713e-34	3	Ifitm1
1.41104e-37	-0.276192	0.566	0.741	2.82209e-34	3	Ppp1r14a
3.0628e-37	-0.261875	0.696	0.767	6.12561e-34	3	Plagl1
4.76136e-37	0.505269	0.929	0.931	9.52272e-34	3	Dnajb1
3.16283e-36	0.33593	0.781	0.742	6.32566e-33	3	Igf1
3.62884e-36	0.567283	0.876	0.875	7.25768e-33	3	Adamts1
2.53709e-35	0.51521	0.874	0.876	5.07418e-32	3	Neat1
8.16374e-35	-0.311291	0.473	0.577	1.63275e-31	3	Sorbs2
4.71243e-34	-0.60383	0.534	0.645	9.42486e-31	3	Hspb1
7.24675e-34	0.442843	0.63	0.617	1.44935e-30	3	Emcn
1.24152e-33	0.28631	0.775	0.743	2.48305e-30	3	Tmem119
2.88922e-33	-0.473068	0.407	0.576	5.77844e-30	3	Fdx1
9.50885e-33	0.644662	0.727	0.683	1.90177e-29	3	Arrdc3
9.5809e-33	-0.284165	0.378	0.508	1.91618e-29	3	Cenpa
1.22905e-32	-0.304059	0.872	0.928	2.4581e-29	3	Fstl1
1.49393e-32	0.290396	0.79	0.736	2.98786e-29	3	Mmp11
3.10828e-32	0.579204	0.668	0.571	6.21656e-29	3	Plk2
4.43879e-32	-1.94773	0.607	0.651	8.87758e-29	3	Actg2
6.63433e-31	-0.411177	0.751	0.859	1.32687e-27	3	Aebp1
7.09468e-31	0.379934	0.757	0.728	1.41894e-27	3	Peg3
7.55487e-31	-0.260658	0.448	0.592	1.51097e-27	3	Filip1l
2.11069e-30	0.359336	0.815	0.786	4.22138e-27	3	Pnp
2.46373e-30	0.58376	0.837	0.856	4.92746e-27	3	Nfkbia
4.02124e-30	-0.819623	0.598	0.71	8.04248e-27	3	Acsbg1
6.1768e-30	0.4203	0.66	0.614	1.23536e-26	3	Ier5l
7.03135e-30	-0.320634	0.56	0.657	1.40627e-26	3	Foxp2
2.98737e-28	0.699112	0.866	0.851	5.97475e-25	3	Gm12840
3.36657e-28	-0.630304	0.742	0.696	6.73314e-25	3	Top2a
5.01481e-28	0.390507	0.754	0.741	1.00296e-24	3	Pdgfrb
5.94094e-28	0.380186	0.675	0.635	1.18819e-24	3	Gucy1a1
2.77128e-27	0.330802	0.729	0.714	5.54256e-24	3	Tcf21
6.68745e-27	-0.826253	0.802	0.846	1.33749e-23	3	Stmn1
8.85409e-26	-0.368274	0.798	0.877	1.77082e-22	3	Cavin3
1.75631e-25	-0.379565	0.854	0.919	3.51263e-22	3	Sparcl1
4.37438e-25	-0.311545	0.521	0.627	8.74876e-22	3	Pkdcc
5.93267e-25	0.262283	0.648	0.578	1.18653e-21	3	Socs1
7.2077e-25	0.452647	0.769	0.771	1.44154e-21	3	Ier5
1.41451e-24	0.305949	0.751	0.722	2.82902e-21	3	Cavin2
1.5846e-24	0.255681	0.661	0.681	3.16921e-21	3	Abca8a
1.07217e-23	-0.356168	0.882	0.931	2.14434e-20	3	Tuba1b
1.25004e-22	-1.40826	0.63	0.679	2.50009e-19	3	Cnn1
2.7335e-22	0.332185	0.971	0.964	5.46701e-19	3	Sox4
1.29029e-20	-0.305597	0.914	0.957	2.58059e-17	3	Lmna
2.51671e-19	-0.380104	0.615	0.687	5.03342e-16	3	Lpl
5.48086e-19	-0.317083	0.527	0.62	1.09617e-15	3	Cdca8
6.81105e-19	0.397676	0.892	0.884	1.36221e-15	3	Pim1
1.34124e-18	-0.350812	0.555	0.621	2.68248e-15	3	Me1
3.66489e-17	-0.294598	0.865	0.926	7.32977e-14	3	Tubb4b
3.80554e-17	-1.24634	0.629	0.679	7.61108e-14	3	Aldh1a1
2.40668e-16	0.509792	0.584	0.578	4.81336e-13	3	Mt2
4.6926e-16	-0.329326	0.476	0.529	9.38521e-13	3	Pdlim3
5.67676e-16	-0.480894	0.544	0.594	1.13535e-12	3	Cenpf
1.08537e-15	-0.257802	0.467	0.546	2.17075e-12	3	Ramp1
4.77123e-15	0.280723	0.896	0.9	9.54246e-12	3	Ier3
7.86077e-15	-0.558298	0.978	0.972	1.57215e-11	3	Col1a1
1.45785e-14	-0.393248	0.8	0.885	2.9157e-11	3	Lpp
2.01605e-14	-0.411119	0.96	0.976	4.0321e-11	3	H2afz
4.19309e-14	0.302408	0.78	0.804	8.38619e-11	3	Arx
5.55125e-14	-0.347415	0.973	0.973	1.11025e-10	3	Tmsb4x
8.78064e-14	-0.271292	0.829	0.867	1.75613e-10	3	Ptch1
2.9557e-13	-0.304875	0.47	0.54	5.9114e-10	3	Smc2
9.34992e-13	0.853309	0.652	0.716	1.86998e-09	3	Hspa1a
1.72789e-12	-0.363007	0.432	0.483	3.45577e-09	3	Hsd11b2
4.36537e-12	-0.38884	0.724	0.795	8.73074e-09	3	Mfap5
4.70232e-12	-0.358383	0.6	0.646	9.40464e-09	3	Tgfbi
2.8212e-11	0.385705	0.756	0.795	5.64239e-08	3	Gm26532
3.68553e-11	-0.320155	0.626	0.679	7.37106e-08	3	Birc5
1.45009e-10	0.371216	0.638	0.649	2.90018e-07	3	Isg15
6.30319e-10	0.277418	0.63	0.655	1.26064e-06	3	Sox9
9.42622e-10	-0.320869	0.992	0.997	1.88524e-06	3	Gm42418
2.58379e-09	-0.312069	0.6	0.658	5.16758e-06	3	Ube2c
4.45094e-09	-0.266468	0.651	0.688	8.90187e-06	3	Lsp1
3.08576e-08	-0.388947	0.342	0.462	6.17151e-05	3	Cyp17a1
8.05067e-08	0.268565	0.67	0.683	0.000161013	3	Gm17056
1.19525e-07	-0.499452	0.599	0.666	0.000239051	3	Hmgb2
1.36423e-07	-0.291512	0.593	0.636	0.000272845	3	Trib2
1.49662e-07	-0.295421	0.606	0.62	0.000299324	3	Scarb1
1.0899e-06	0.290871	0.252	0.28	0.0021798	3	Hba-a2
3.49145e-06	0.320172	0.608	0.627	0.00698289	3	Phlda1
3.10917e-05	0.28774	0.75	0.778	0.0621833	3	Ddit4l
4.17455e-05	-0.708126	0.668	0.691	0.083491	3	Lmod1
4.91581e-05	-1.41197	0.512	0.462	0.0983163	3	Hsd3b1
7.95663e-05	0.297137	0.441	0.399	0.159133	3	Efemp1
0.000118153	-0.361003	0.698	0.754	0.236306	3	S100a6
0.000180389	-0.259506	0.659	0.674	0.360778	3	Mmd2
0.000343968	-0.321808	0.715	0.761	0.687935	3	Eln
0.00262702	-0.399382	0.551	0.589	1	3	Prc1
0.00272474	0.603304	0.561	0.624	1	3	Hspa1b
0.00336387	-0.710774	0.578	0.609	1	3	Meg3
0.00350133	-0.264204	0.464	0.486	1	3	Postn
0.00405141	0.312993	0.718	0.787	1	3	Sat1
0.00992612	-0.388981	0.975	0.985	1	3	Col3a1
0	1.9839	0.99	0.73	0	4	Col15a1
0	1.76115	0.929	0.701	0	4	Cd24a
0	1.75428	0.998	0.968	0	4	Col4a1
0	1.52108	1	0.994	0	4	Igfbp7
0	1.51445	0.997	0.935	0	4	Col4a2
0	1.20177	0.942	0.604	0	4	Plac8
0	1.07934	0.957	0.772	0	4	Lamc3
0	1.06569	0.951	0.77	0	4	Akr1b8
0	1.04257	0.933	0.677	0	4	6030408B16Rik
0	0.975402	0.933	0.733	0	4	Ramp2
0	0.966741	0.903	0.767	0	4	Serpina3g
0	0.954526	0.999	0.944	0	4	Cygb
0	0.894883	0.887	0.689	0	4	Thbd
0	0.86945	0.908	0.681	0	4	Adcy7
0	0.86748	0.913	0.696	0	4	Col26a1
0	0.864852	0.803	0.487	0	4	Spry1
0	0.862959	0.888	0.607	0	4	Wisp1
0	0.817544	0.979	0.835	0	4	Lama2
0	0.809353	0.88	0.641	0	4	1500009L16Rik
0	0.556919	0.794	0.535	0	4	Batf3
0	0.523029	0.82	0.539	0	4	Gfra2
0	0.379587	0.748	0.366	0	4	Scml4
0	0.253493	0.772	0.565	0	4	Arap2
1.85721e-307	0.4542	0.772	0.487	3.71441e-304	4	Spry4
1.50651e-305	0.835801	0.956	0.743	3.01302e-302	4	Slc29a1
3.86142e-300	1.21358	0.944	0.826	7.72284e-297	4	Adamts4
3.75495e-295	0.836892	0.845	0.538	7.5099e-292	4	Enpep
1.04551e-293	0.292682	0.762	0.565	2.09103e-290	4	Slc6a11
1.01191e-291	0.934792	0.976	0.865	2.02381e-288	4	Tagln2
4.5924e-287	0.519647	0.861	0.663	9.18479e-284	4	Abca8a
1.44465e-283	0.813745	0.945	0.763	2.88931e-280	4	Nrp1
3.08122e-269	0.847468	1	0.976	6.16244e-266	4	Bgn
7.82865e-265	0.719409	0.818	0.6	1.56573e-261	4	Emcn
3.22595e-263	0.590653	0.807	0.531	6.4519e-260	4	Cxcl16
7.81759e-263	0.996032	0.916	0.689	1.56352e-259	4	Tmem100
1.00796e-254	0.543958	0.856	0.656	2.01591e-251	4	Mmd2
2.80038e-254	0.904907	0.894	0.697	5.60076e-251	4	Spats2l
4.7465e-254	0.567288	0.883	0.595	9.49299e-251	4	Scarb1
6.92311e-254	0.798035	0.714	0.45	1.38462e-250	4	Ramp3
4.82523e-251	0.2939	0.736	0.506	9.65046e-248	4	Piezo2
4.65044e-241	0.89929	0.872	0.622	9.30087e-238	4	Tgfbi
5.21861e-241	0.482473	0.841	0.614	1.04372e-237	4	Trib2
4.25738e-232	0.637861	0.981	0.913	8.51475e-229	4	Eva1b
2.62508e-231	0.80866	0.898	0.815	5.25017e-228	4	Hk2
1.96975e-229	1.2782	0.947	0.792	3.93949e-226	4	Timp3
1.0409e-225	0.658677	0.769	0.534	2.0818e-222	4	Clca3a1
2.63704e-225	0.425468	0.706	0.534	5.27408e-222	4	Cacna1s
4.53087e-219	0.609364	0.847	0.639	9.06173e-216	4	Emp1
1.6185e-218	0.626141	0.999	0.982	3.23699e-215	4	Tpm1
2.6786e-215	0.633457	0.983	0.906	5.35721e-212	4	Nid1
2.80628e-210	0.59111	0.889	0.812	5.61255e-207	4	Ucp2
1.97088e-208	0.331677	0.751	0.645	3.94175e-205	4	Casp4
2.76047e-207	0.660705	0.8	0.64	5.52093e-204	4	Sox9
5.93828e-206	0.473552	0.804	0.644	1.18766e-202	4	Rab20
1.56755e-205	0.708076	0.757	0.559	3.13509e-202	4	Ace
1.39763e-201	0.789211	0.753	0.441	2.79526e-198	4	Prlr
2.88417e-199	0.584398	0.814	0.633	5.76833e-196	4	Cotl1
2.53188e-198	0.712689	0.908	0.807	5.06376e-195	4	Bpgm
6.28384e-197	0.463541	0.846	0.762	1.25677e-193	4	Colec11
9.34952e-195	0.343526	1	0.996	1.8699e-191	4	Col1a2
3.15241e-194	0.60715	0.936	0.74	6.30483e-191	4	Olfml3
1.27783e-192	0.671703	0.835	0.599	2.55566e-189	4	Pkdcc
9.98095e-190	0.336826	0.67	0.463	1.99619e-186	4	Hdc
3.43717e-188	0.502664	0.843	0.663	6.87435e-185	4	Tbx2
6.63438e-184	0.620441	0.848	0.657	1.32688e-180	4	Crem
2.19703e-181	0.613494	0.999	0.978	4.39407e-178	4	Ifitm3
1.73802e-179	0.587493	0.751	0.576	3.47603e-176	4	Rasgrp2
1.87635e-178	0.943761	0.979	0.921	3.75269e-175	4	Klf2
8.0926e-178	0.590323	0.954	0.849	1.61852e-174	4	Emilin1
5.45431e-175	0.718805	0.77	0.686	1.09086e-171	4	Iigp1
3.12768e-170	0.577455	0.709	0.523	6.25535e-167	4	Asb4
1.24031e-166	0.427938	0.862	0.662	2.48063e-163	4	Ntrk2
3.05599e-162	0.555415	0.976	0.877	6.11197e-159	4	Fbn1
3.45439e-161	0.555985	0.856	0.73	6.90879e-158	4	Nhsl2
5.59583e-161	0.358556	0.781	0.638	1.11917e-157	4	Ubash3b
5.2455e-158	0.441574	0.762	0.641	1.0491e-154	4	Osmr
1.92635e-156	0.403813	0.76	0.586	3.8527e-153	4	Metrn
3.87979e-156	0.503477	0.951	0.866	7.75957e-153	4	Agt
3.69525e-153	0.427166	0.776	0.633	7.39051e-150	4	Mical2
5.30105e-153	0.500811	0.801	0.605	1.06021e-149	4	Tgfbr2
3.31312e-152	0.58045	0.881	0.724	6.62624e-149	4	Rhoj
2.75581e-149	0.554823	0.888	0.733	5.51163e-146	4	Fbn2
5.51861e-145	0.469505	0.917	0.779	1.10372e-141	4	Col5a1
1.08662e-142	0.397888	0.685	0.476	2.17323e-139	4	Mndal
3.27499e-142	0.45605	0.982	0.907	6.54997e-139	4	Pcolce
2.04904e-141	0.788987	0.927	0.845	4.09808e-138	4	Gm12840
9.34525e-141	0.512498	0.972	0.894	1.86905e-137	4	2024-09-11
1.41412e-136	0.526837	0.857	0.727	2.82824e-133	4	Ifi27l2a
1.24269e-133	0.364659	0.856	0.692	2.48538e-130	4	Myo1b
7.20066e-133	0.853085	0.982	0.945	1.44013e-129	4	Gadd45b
8.81081e-132	0.548366	0.744	0.496	1.76216e-128	4	Vcan
2.04495e-130	0.515412	0.894	0.73	4.0899e-127	4	Osr2
5.73591e-130	0.718949	0.956	0.837	1.14718e-126	4	Cebpd
7.4678e-130	0.29792	0.823	0.702	1.49356e-126	4	Trib1
7.02577e-129	0.49679	0.902	0.742	1.40515e-125	4	Pdgfra
2.77606e-124	0.474487	0.877	0.716	5.55211e-121	4	Sh3bgrl3
7.83476e-124	0.436287	0.659	0.434	1.56695e-120	4	Ifi203
7.16679e-123	0.259092	0.727	0.583	1.43336e-119	4	Cdc42ep2
1.18196e-122	0.501263	0.873	0.725	2.36392e-119	4	Sgk1
1.27731e-119	0.485009	0.694	0.517	2.55462e-116	4	Lgi2
1.61414e-119	0.971898	0.905	0.771	3.22827e-116	4	Cxcl14
2.89988e-119	0.35102	0.713	0.6	5.79975e-116	4	Cdh5
2.43303e-117	0.511933	0.673	0.421	4.86606e-114	4	Plat
1.63759e-116	0.478587	0.983	0.917	3.27519e-113	4	Bicc1
2.32776e-116	0.448557	0.903	0.734	4.65553e-113	4	Cdh11
2.33799e-116	0.425294	0.809	0.683	4.67598e-113	4	Heyl
2.32236e-115	0.357963	0.644	0.498	4.64472e-112	4	Lipg
3.20557e-114	0.419047	0.685	0.466	6.41114e-111	4	Spry2
6.55349e-114	-0.342542	0.475	0.686	1.3107e-110	4	Aoc3
1.29271e-113	0.864333	0.99	0.962	2.58543e-110	4	Mgp
2.20321e-112	0.349251	0.994	0.949	4.40641e-109	4	Dcn
2.35299e-110	0.348184	0.825	0.657	4.70598e-107	4	Pde5a
4.15797e-109	0.374501	0.821	0.648	8.31594e-106	4	Bhlhe40
3.94002e-104	0.321907	0.623	0.441	7.88004e-101	4	Mrap
1.01007e-102	0.412331	0.735	0.516	2.02014e-99	4	Twist1
7.1552e-102	0.463291	0.834	0.754	1.43104e-98	4	Dusp5
2.04722e-101	0.495399	0.959	0.883	4.09445e-98	4	Ccnd2
5.35339e-101	-0.327551	0.485	0.691	1.07068e-97	4	Birc5
4.84891e-100	0.336708	0.562	0.279	9.69783e-97	4	Aplnr
1.31546e-99	0.602582	0.668	0.624	2.63093e-96	4	Slc38a5
8.29949e-99	0.470579	0.994	0.98	1.6599e-95	4	Lgals1
1.80147e-98	0.361935	0.776	0.601	3.60294e-95	4	Kctd12
3.79866e-98	0.446624	0.885	0.774	7.59733e-95	4	Gem
1.21475e-96	0.263216	0.774	0.68	2.42951e-93	4	Gbp7
1.08738e-95	0.358936	0.771	0.595	2.17476e-92	4	Gm10600
1.20013e-94	0.466505	0.929	0.841	2.40027e-91	4	Fhl2
2.28564e-90	-0.350013	0.405	0.596	4.57127e-87	4	Myocd
1.062e-89	0.952347	0.905	0.861	2.124e-86	4	Mt1
6.13371e-89	-0.273004	0.535	0.652	1.22674e-85	4	Spon2
1.67025e-88	-0.336719	0.478	0.657	3.3405e-85	4	Tnxb
1.53471e-86	0.309175	0.901	0.803	3.06942e-83	4	Fscn1
6.95549e-83	0.361056	0.989	0.95	1.3911e-79	4	Ldha
7.3399e-81	0.406851	0.633	0.475	1.46798e-77	4	Tcim
1.33974e-80	0.341425	0.894	0.796	2.67948e-77	4	Ly6e
2.47477e-74	0.262655	0.774	0.658	4.94954e-71	4	Itga6
4.75161e-74	0.268606	0.785	0.663	9.50322e-71	4	Lbh
4.3804e-71	0.344967	0.626	0.509	8.76079e-68	4	Has1
8.5868e-71	-0.292978	0.438	0.597	1.71736e-67	4	Hmga2
2.23282e-70	0.377623	0.902	0.764	4.46564e-67	4	Manf
4.98836e-70	0.542901	0.704	0.643	9.97672e-67	4	Isg15
1.15357e-69	-0.314777	0.557	0.618	2.30714e-66	4	Ntrk3
1.3936e-69	0.27121	0.814	0.718	2.78721e-66	4	Stox2
1.68527e-68	0.270359	0.751	0.635	3.37055e-65	4	Dnm3os
2.78181e-68	0.378237	0.963	0.899	5.56362e-65	4	Maged2
2.7182e-67	0.334308	0.76	0.622	5.43641e-64	4	D10Wsu102e
3.47596e-67	0.335645	0.789	0.728	6.95192e-64	4	Nfkbiz
1.87143e-66	0.254129	0.936	0.833	3.74287e-63	4	Tubb6
2.20576e-66	-0.371335	0.391	0.6	4.41153e-63	4	Ms4a4d
2.47641e-66	0.581529	0.747	0.717	4.95282e-63	4	Cxcl10
5.71707e-66	-0.357272	0.642	0.755	1.14341e-62	4	Bcat1
2.2084e-65	0.294825	0.559	0.408	4.41679e-62	4	Abcc9
1.09273e-63	0.313581	0.891	0.789	2.18545e-60	4	Ugdh
2.90859e-63	0.433752	0.929	0.858	5.81718e-60	4	Fgl2
3.55114e-63	-0.39563	0.557	0.746	7.10228e-60	4	Srpx2
1.67664e-62	0.342985	0.93	0.858	3.35329e-59	4	Ptch1
1.55272e-59	0.288357	0.716	0.567	3.10545e-56	4	Plk2
2.93363e-59	0.270988	0.834	0.712	5.86725e-56	4	Actr3b
2.21043e-57	-0.326458	0.471	0.649	4.42086e-54	4	Wnt5a
2.91368e-57	0.319978	0.978	0.922	5.82735e-54	4	Htra1
4.38679e-54	-0.292095	0.407	0.6	8.77357e-51	4	Mt3
1.29847e-53	0.363896	0.931	0.854	2.59695e-50	4	Klf6
1.77147e-53	-0.331961	0.294	0.517	3.54294e-50	4	Syt1
3.27653e-53	0.357787	0.938	0.869	6.55306e-50	4	Adamts1
5.41843e-53	0.29167	0.816	0.703	1.08369e-49	4	Egr2
1.00659e-51	0.278393	0.975	0.919	2.01319e-48	4	Fstl1
2.76121e-51	0.259301	0.795	0.675	5.52243e-48	4	Gadd45a
7.85872e-51	0.269372	0.825	0.715	1.57174e-47	4	Adamts9
3.85003e-50	0.336368	0.91	0.836	7.70007e-47	4	Nr4a2
7.46399e-49	0.289123	0.984	0.956	1.4928e-45	4	Hsp90b1
2.69086e-48	-0.383676	0.551	0.701	5.38173e-45	4	Cav1
2.25233e-46	-0.308154	0.401	0.574	4.50466e-43	4	Gm26802
3.54272e-46	0.267212	0.614	0.506	7.08543e-43	4	Nrk
4.53838e-46	0.34041	0.848	0.736	9.07676e-43	4	2810474O19Rik
7.77514e-46	-0.260541	0.656	0.754	1.55503e-42	4	Fmod
1.48933e-44	0.35347	0.527	0.348	2.97866e-41	4	Vcam1
4.28095e-44	0.268695	0.839	0.799	8.5619e-41	4	Akap12
6.31964e-43	0.48693	0.909	0.873	1.26393e-39	4	Neat1
4.80154e-42	0.362886	0.799	0.71	9.60307e-39	4	Mafb
7.03245e-42	0.267782	0.795	0.76	1.40649e-38	4	Glipr2
5.11134e-41	-0.274132	0.489	0.584	1.02227e-37	4	Hspb8
1.12324e-39	0.6338	0.698	0.694	2.24648e-36	4	Fabp5
1.73029e-39	-0.269303	0.481	0.655	3.46059e-36	4	Sorbs1
2.83536e-39	-0.258718	0.395	0.547	5.67072e-36	4	Tnc
2.92238e-36	-0.394285	0.574	0.738	5.84477e-33	4	Cavin2
4.46958e-36	-0.328366	0.671	0.769	8.93917e-33	4	Plagl1
7.27715e-36	-0.34014	0.871	0.889	1.45543e-32	4	Tpi1
1.37582e-34	-0.33136	0.44	0.599	2.75163e-31	4	Prkar2b
2.94384e-34	-0.309367	0.964	0.95	5.88768e-31	4	Mif
5.09302e-33	-0.292459	0.283	0.472	1.0186e-29	4	Pde3a
1.19059e-28	-0.272385	0.499	0.656	2.38119e-25	4	Pank1
1.32432e-28	-0.334711	0.945	0.94	2.64863e-25	4	Serpinb6a
2.60722e-28	0.278686	0.931	0.897	5.21443e-25	4	Ier3
2.65916e-28	-0.28234	0.716	0.757	5.31833e-25	4	Tnni3
2.84497e-28	-0.321906	0.377	0.527	5.68994e-25	4	Hpgd
3.98312e-26	-0.328023	0.687	0.612	7.96623e-23	4	Stc1
1.11265e-25	0.262208	0.552	0.505	2.2253e-22	4	Ccnd1
2.76939e-25	-0.316594	0.676	0.731	5.53877e-22	4	Arhgap29
1.15234e-24	-0.305246	0.359	0.487	2.30468e-21	4	Pdgfrl
1.48154e-24	-0.392745	0.741	0.788	2.96309e-21	4	Fxyd6
2.02234e-23	-0.270006	0.354	0.49	4.04468e-20	4	Hist1h1b
1.20988e-22	-0.392096	0.675	0.614	2.41976e-19	4	Pclaf
4.32623e-22	-0.279494	0.347	0.479	8.65245e-19	4	Pparg
6.79154e-22	-0.318924	0.625	0.662	1.35831e-18	4	Mustn1
4.15239e-21	-0.255059	0.502	0.606	8.30478e-18	4	H2-D1
1.61825e-20	-0.309608	0.722	0.728	3.2365e-17	4	Bdnf
2.1482e-20	-0.332843	0.532	0.612	4.29639e-17	4	Cd9
2.96716e-18	-0.33231	0.302	0.435	5.93432e-15	4	Id4
2.49345e-17	-0.311982	0.686	0.717	4.98689e-14	4	Sdc4
5.2696e-17	-0.252259	0.359	0.47	1.05392e-13	4	Myoc
7.91865e-16	-0.282796	0.971	0.956	1.58373e-12	4	Ube2s
5.40575e-15	-0.305848	0.595	0.642	1.08115e-11	4	Ntng1
1.46097e-14	-0.262067	0.497	0.543	2.92195e-11	4	Ramp1
3.57195e-14	-0.309401	0.623	0.61	7.14391e-11	4	Tpx2
2.76706e-13	-0.278575	0.564	0.651	5.53412e-10	4	Zdbf2
4.01008e-13	-0.338556	0.896	0.902	8.02016e-10	4	Nupr1
2.44488e-12	-0.388461	0.91	0.93	4.88976e-09	4	Inha
2.89577e-12	-0.284041	0.874	0.855	5.79155e-09	4	Dek
1.33891e-11	0.297736	0.503	0.506	2.67782e-08	4	Steap4
1.76692e-11	-0.290834	0.644	0.555	3.53384e-08	4	Fdx1
5.37134e-11	-0.253509	0.649	0.669	1.07427e-07	4	Vegfd
7.27113e-11	-0.289309	0.384	0.489	1.45423e-07	4	Cdkn1c
7.6038e-11	-0.385351	0.947	0.945	1.52076e-07	4	Serping1
1.19676e-09	-0.288567	0.43	0.488	2.39351e-06	4	Slc26a7
2.34692e-09	-0.283158	0.845	0.87	4.69384e-06	4	Slc9a3r2
1.05624e-08	-0.334883	0.934	0.92	2.11248e-05	4	Tubb4b
2.04129e-08	-0.270823	0.637	0.583	4.08257e-05	4	Cenpe
2.4713e-08	-0.328117	0.783	0.781	4.94259e-05	4	Cnn2
3.70475e-08	-0.306416	0.353	0.418	7.40951e-05	4	Penk
1.11149e-07	-0.383309	0.494	0.527	0.000222297	4	Pdlim3
1.41868e-07	-0.378524	0.94	0.901	0.000283736	4	Tacc1
1.49509e-07	-0.297801	0.609	0.667	0.000299018	4	Rasl11a
1.53601e-07	-0.326913	0.791	0.792	0.000307202	4	Gm26532
1.53733e-07	-0.332833	0.87	0.886	0.000307465	4	Pim1
1.62627e-07	-0.376825	0.387	0.458	0.000325254	4	Cyp17a1
2.72366e-07	-0.380146	0.873	0.839	0.000544731	4	Stmn1
2.87166e-07	-0.355671	0.965	0.952	0.000574331	4	Lmna
4.40489e-07	-0.278333	0.753	0.765	0.000880977	4	Col5a2
5.70845e-07	-0.318457	0.759	0.761	0.00114169	4	Arl6ip1
7.51458e-07	-0.296329	0.536	0.554	0.00150292	4	Kitl
1.96405e-06	-0.267494	0.544	0.55	0.00392811	4	Bpifb4
3.7287e-06	-0.264598	0.554	0.622	0.0074574	4	Smc4
6.42967e-06	-0.30527	0.482	0.499	0.0128593	4	Tgfb2
8.65036e-06	-0.27745	0.471	0.485	0.0173007	4	Postn
2.22685e-05	-0.279879	0.753	0.767	0.044537	4	Hjurp
2.25519e-05	-0.270608	0.933	0.931	0.0451038	4	Dnajb1
0.000165538	-0.27114	0.715	0.716	0.331077	4	Tmpo
0.00153274	-0.300191	0.59	0.614	1	4	Cdca8
0.00242131	-0.313425	0.592	0.585	1	4	Pik3r1
0.00800734	-0.268839	0.705	0.669	1	4	Cyp1b1
0.00875766	-0.353454	0.668	0.571	1	4	Filip1l
1.71121e-272	0.99918	0.964	0.786	3.42243e-269	5	Sfrp1
7.61515e-271	0.884121	0.845	0.652	1.52303e-267	5	Dpt
4.83096e-260	0.918928	0.984	0.869	9.66193e-257	5	Htra3
2.47534e-242	0.879047	0.998	0.954	4.95067e-239	5	Rarres2
1.63455e-235	0.770235	0.831	0.585	3.26909e-232	5	Adamtsl2
3.23349e-232	0.845252	0.982	0.869	6.46697e-229	5	Kcnk2
1.62464e-225	0.702613	0.989	0.92	3.24929e-222	5	Gsn
8.73118e-224	0.766119	0.918	0.733	1.74624e-220	5	Loxl1
1.82056e-221	0.876141	0.84	0.554	3.64111e-218	5	Lbp
7.1676e-220	0.728554	0.834	0.499	1.43352e-216	5	Dpep1
9.49359e-211	0.791342	0.997	0.93	1.89872e-207	5	Ogn
1.10019e-208	0.570485	0.921	0.733	2.20037e-205	5	Tmem119
1.38413e-203	0.834676	0.869	0.554	2.76826e-200	5	Aspn
2.10613e-200	0.46693	1	0.999	4.21226e-197	5	Sparc
3.28905e-190	0.532735	0.818	0.654	6.5781e-187	5	Cilp
6.23584e-189	0.72235	0.995	0.948	1.24717e-185	5	Mfap4
3.287e-173	0.450857	0.866	0.764	6.574e-170	5	Pde4b
3.78976e-173	0.60239	0.972	0.861	7.57953e-170	5	Slc9a3r2
4.12726e-173	0.303415	0.808	0.63	8.25451e-170	5	Spon2
3.78315e-172	0.612503	1	0.982	7.5663e-169	5	Cfh
6.51535e-169	0.657487	0.856	0.623	1.30307e-165	5	Clec1a
3.75404e-164	0.681345	0.947	0.802	7.50809e-161	5	Wnt4
1.67286e-156	0.686344	0.84	0.719	3.34572e-153	5	Bdnf
7.9298e-155	0.600989	0.999	0.976	1.58596e-151	5	Bgn
8.19051e-148	0.478483	0.708	0.474	1.6381e-144	5	Hs3st1
7.20403e-146	0.406291	0.775	0.61	1.44081e-142	5	Gpc6
8.41499e-145	0.457199	0.915	0.737	1.683e-141	5	S100a6
1.7e-143	0.743091	0.999	0.962	3.4e-140	5	Mgp
4.94252e-143	0.652235	0.997	0.944	9.88504e-140	5	Cygb
7.26054e-143	0.531853	0.989	0.922	1.45211e-139	5	Htra1
1.55775e-142	0.623984	0.889	0.709	3.1155e-139	5	Loxl2
1.65418e-142	0.624814	0.956	0.88	3.30835e-139	5	Fbn1
1.92456e-142	0.372735	0.999	0.971	3.84912e-139	5	Col1a1
1.10703e-140	0.572468	0.84	0.669	2.21407e-137	5	Lpl
1.30969e-140	0.526238	0.886	0.732	2.61938e-137	5	Prelp
3.63569e-133	0.362832	0.781	0.639	7.27139e-130	5	Ly6h
1.40709e-132	0.571615	0.99	0.908	2.81417e-129	5	Sparcl1
2.74871e-132	0.558679	0.827	0.599	5.49741e-129	5	Kctd12
1.68784e-128	0.554866	0.968	0.901	3.37568e-125	5	Igfbp4
1.42402e-126	0.499406	1	0.991	2.84803e-123	5	Itih5
4.76257e-125	0.297705	0.998	0.983	9.52514e-122	5	Col3a1
2.12853e-124	0.340216	0.873	0.761	4.25706e-121	5	Ptges
3.97551e-119	0.501456	0.866	0.72	7.95103e-116	5	Srpx2
9.12912e-117	0.540533	0.975	0.86	1.82582e-113	5	Lum
1.01991e-113	0.413421	0.989	0.939	2.03983e-110	5	Col6a2
1.60636e-113	-0.588813	0.611	0.727	3.21271e-110	5	Cd24a
2.06302e-108	0.322915	0.674	0.476	4.12604e-105	5	Lrat
4.74327e-106	0.40296	0.832	0.622	9.48653e-103	5	S100a16
1.13721e-105	0.556646	0.732	0.486	2.27442e-102	5	Spon1
4.84235e-105	0.545155	0.918	0.778	9.6847e-102	5	Fn1
9.46443e-104	0.428634	0.937	0.802	1.89289e-100	5	Ccdc80
1.07985e-103	0.564353	0.834	0.703	2.15969e-100	5	Rbp4
5.46565e-102	0.494013	0.913	0.779	1.09313e-98	5	Mfap5
9.85737e-102	0.38501	0.86	0.712	1.97147e-98	5	H2-K1
2.68702e-101	0.480544	0.801	0.657	5.37404e-98	5	Vegfd
5.73306e-101	0.361385	0.847	0.682	1.14661e-97	5	Heyl
1.85405e-100	0.413384	0.915	0.799	3.70811e-97	5	Gpx3
3.32262e-96	0.372834	0.865	0.765	6.64523e-93	5	Gm13889
3.3801e-96	0.348664	0.815	0.644	6.76021e-93	5	Lox
5.11889e-96	-0.883089	0.409	0.633	1.02378e-92	5	Stc1
1.30413e-95	0.510459	0.902	0.81	2.60826e-92	5	Socs2
1.68757e-95	0.507314	0.982	0.925	3.37514e-92	5	Pmepa1
2.42743e-95	-0.43856	0.806	0.808	4.85486e-92	5	Wfdc1
1.1092e-93	-0.665078	0.702	0.74	2.21841e-90	5	Hhip
3.19577e-93	0.332679	0.885	0.759	6.39153e-90	5	Ank2
2.69121e-92	0.375398	0.81	0.648	5.38242e-89	5	Synpo
6.50369e-91	0.405727	0.876	0.657	1.30074e-87	5	Cyp1b1
2.30664e-90	0.536532	0.898	0.798	4.61328e-87	5	Serpine2
1.46709e-89	0.435238	0.95	0.863	2.93418e-86	5	Col11a1
2.86411e-89	0.549502	0.994	0.95	5.72821e-86	5	Klf4
9.18207e-89	0.485837	0.996	0.973	1.83641e-85	5	Vim
2.48238e-88	0.374558	0.929	0.786	4.96476e-85	5	Col6a3
3.82237e-87	-0.40646	0.527	0.683	7.64474e-84	5	Mmd2
6.47665e-86	-0.29343	0.486	0.691	1.29533e-82	5	Tbx2
7.01745e-86	0.293839	0.857	0.738	1.40349e-82	5	Fmod
1.85426e-85	0.347224	0.754	0.62	3.70853e-82	5	Nnmt
2.6893e-85	0.625108	0.81	0.678	5.37859e-82	5	Arrdc3
3.27341e-85	0.379943	0.865	0.748	6.54682e-82	5	Foxs1
8.01355e-84	0.405279	0.837	0.669	1.60271e-80	5	Lhfp
5.65809e-83	-0.260593	0.507	0.655	1.13162e-79	5	Mical2
3.87019e-82	0.547995	0.658	0.415	7.74038e-79	5	Ctsc
4.46352e-80	0.395784	0.949	0.855	8.92705e-77	5	Icam1
7.33465e-80	0.281648	0.985	0.942	1.46693e-76	5	Serping1
1.061e-79	0.484097	0.998	0.98	2.12199e-76	5	Fos
2.05767e-78	0.371638	0.895	0.736	4.11533e-75	5	Matn2
1.60244e-75	-0.55992	0.736	0.819	3.20488e-72	5	Gpc3
1.93987e-75	0.342084	0.899	0.754	3.87973e-72	5	Col5a2
1.55903e-74	0.50784	0.941	0.84	3.11807e-71	5	Cebpd
1.89973e-72	0.499278	0.976	0.909	3.79947e-69	5	Dusp1
2.80673e-72	0.453612	0.802	0.679	5.61347e-69	5	Fbln5
4.70699e-71	0.277038	0.995	0.969	9.41398e-68	5	Col6a1
2.12691e-70	0.545966	0.997	0.99	4.25382e-67	5	Apoe
4.92273e-70	-0.554237	0.736	0.791	9.84547e-67	5	Lamc3
2.70355e-69	0.405683	0.988	0.929	5.4071e-66	5	Tuba1a
4.76634e-69	-0.725913	0.744	0.836	9.53267e-66	5	Grb14
1.51762e-68	0.368407	0.98	0.918	3.03524e-65	5	Bicc1
3.31365e-68	0.334366	0.912	0.83	6.62731e-65	5	Adamts4
1.35996e-67	0.434743	0.648	0.51	2.71992e-64	5	Pcsk6
3.6671e-66	0.334596	0.989	0.958	7.3342e-63	5	Rbp1
2.96224e-65	0.269394	0.778	0.585	5.92448e-62	5	H2-D1
1.80664e-64	0.346393	0.953	0.891	3.61329e-61	5	Cyb5a
1.93662e-64	-0.310847	0.45	0.63	3.87325e-61	5	Emcn
4.73963e-64	0.270056	0.657	0.442	9.47926e-61	5	Pde3a
1.60577e-63	-0.568167	0.966	0.828	3.21154e-60	5	Tagln
2.70503e-63	0.495589	0.952	0.9	5.41006e-60	5	Tacc1
5.72503e-63	0.291718	0.899	0.782	1.14501e-59	5	Col5a1
1.81835e-62	-0.391485	0.268	0.465	3.6367e-59	5	Cyp17a1
2.3093e-62	-0.689147	0.553	0.718	4.61859e-59	5	Tmem100
3.66484e-62	0.265516	0.992	0.97	7.32968e-59	5	Ctsl
8.05226e-60	0.338359	0.997	0.979	1.61045e-56	5	Fosb
1.90384e-57	0.266444	0.789	0.671	3.80768e-54	5	Ntrk2
1.25879e-56	0.32021	0.784	0.662	2.51758e-53	5	Serpine1
1.33678e-56	0.371599	0.789	0.627	2.67355e-53	5	Gucy1a1
1.35062e-56	0.328501	0.716	0.573	2.70124e-53	5	Ms4a4d
1.81997e-54	0.301569	0.988	0.947	3.63994e-51	5	Mdk
1.26245e-53	-0.464263	0.795	0.851	2.52489e-50	5	Nrp2
3.02785e-51	0.373102	0.759	0.633	6.05569e-48	5	Phgdh
1.87167e-50	0.330733	0.949	0.897	3.74333e-47	5	2024-09-11
1.10127e-47	-0.323978	0.542	0.681	2.20254e-44	5	Pde5a
1.45568e-47	-0.888381	0.991	0.983	2.91137e-44	5	Tpm1
3.04943e-46	-0.555184	0.698	0.747	6.09887e-43	5	Osr2
4.70317e-46	0.267015	0.96	0.894	9.40633e-43	5	Selenop
7.21507e-46	0.288036	0.647	0.527	1.44301e-42	5	Tnc
1.85467e-45	-0.639913	0.851	0.864	3.70935e-42	5	Ptch1
2.8788e-44	-0.348608	0.594	0.732	5.7576e-41	5	Mef2c
4.10278e-44	0.273688	0.964	0.909	8.20555e-41	5	Nid1
2.42116e-43	-0.313605	0.333	0.509	4.84232e-40	5	Ptn
3.34662e-42	-0.437415	0.382	0.534	6.69324e-39	5	Lmcd1
3.69552e-42	0.250588	0.812	0.709	7.39104e-39	5	Hic1
4.50294e-42	0.261255	0.85	0.779	9.00588e-39	5	Cxcl12
1.01369e-41	-0.352858	0.637	0.704	2.02738e-38	5	Adcy7
2.01952e-41	-0.503139	0.558	0.637	4.03904e-38	5	Plac8
3.28814e-41	-0.325624	0.766	0.812	6.57629e-38	5	Pltp
1.31513e-39	-0.349209	0.522	0.628	2.63025e-36	5	Mest
2.81925e-39	0.257095	0.964	0.89	5.6385e-36	5	Socs3
5.28867e-37	-0.789635	0.689	0.789	1.05773e-33	5	Cxcl14
6.44654e-35	-0.967044	0.682	0.702	1.28931e-31	5	Acsbg1
2.95277e-34	-0.269922	0.734	0.536	5.90553e-31	5	Bpifb4
4.62862e-34	-0.778781	0.79	0.87	9.25723e-31	5	Mt1
1.76404e-33	-0.532741	0.747	0.809	3.52808e-30	5	Timp3
1.79823e-33	-0.482251	0.892	0.886	3.59646e-30	5	Hspd1
2.24678e-33	0.278277	0.856	0.787	4.49356e-30	5	Gm26532
4.99336e-33	0.342513	0.734	0.617	9.98672e-30	5	Phlda1
1.69591e-31	-0.346689	0.64	0.664	3.39183e-28	5	Tdrd5
5.74131e-31	-0.365146	0.717	0.742	1.14826e-27	5	Nhsl2
2.01661e-30	0.383108	0.957	0.929	4.03323e-27	5	Dnajb1
6.06821e-30	0.375139	0.732	0.62	1.21364e-26	5	Cyr61
1.24263e-29	-0.524347	0.986	0.974	2.48526e-26	5	H2afz
1.06106e-28	-0.336044	0.52	0.592	2.12212e-25	5	Cenpe
4.53055e-28	-0.347083	0.624	0.663	9.06109e-25	5	1500009L16Rik
6.25429e-28	-0.333788	0.542	0.617	1.25086e-24	5	Kctd14
2.2551e-27	-0.384334	0.366	0.473	4.5102e-24	5	Prlr
1.40568e-26	-0.692107	0.458	0.563	2.81136e-23	5	Des
2.7273e-26	-0.407459	0.845	0.847	5.4546e-23	5	Lama2
6.68703e-26	-0.408293	0.54	0.624	1.33741e-22	5	Pkdcc
1.86598e-25	-0.262769	0.48	0.559	3.73196e-22	5	Clca3a1
5.41852e-25	-0.265683	0.626	0.468	1.0837e-21	5	Hist1h1b
1.5988e-24	-0.484006	0.511	0.596	3.1976e-21	5	Cenpf
2.75345e-23	-0.419169	0.654	0.691	5.5069e-20	5	Cav1
9.27842e-23	-0.286229	0.742	0.765	1.85568e-19	5	Dtx4
1.6934e-22	-0.514447	0.549	0.642	3.3868e-19	5	Hspb1
2.48536e-22	-0.38268	0.669	0.717	4.97072e-19	5	Spats2l
6.31747e-22	-0.257734	0.587	0.685	1.26349e-18	5	Nt5dc2
6.32559e-22	-0.538384	0.515	0.602	1.26512e-18	5	Ednrb
1.63317e-21	-0.419691	0.576	0.621	3.26634e-18	5	Scarb1
1.70761e-21	-0.315038	0.568	0.64	3.41523e-18	5	Mid1ip1
8.1878e-21	-0.269196	0.744	0.781	1.63756e-17	5	Tgm2
1.15691e-20	-0.282448	0.674	0.694	2.31382e-17	5	Iigp1
3.04827e-20	-0.467839	0.55	0.564	6.09654e-17	5	Enpep
1.01383e-19	-0.427674	0.867	0.865	2.02766e-16	5	Chchd10
1.40275e-19	-0.359253	0.714	0.769	2.80551e-16	5	Hjurp
1.40635e-19	0.356964	0.792	0.704	2.8127e-16	5	Hspa1a
3.41222e-17	-0.35765	0.805	0.824	6.82444e-14	5	Hk2
4.98033e-17	-0.317186	0.593	0.614	9.96065e-14	5	Fbxo32
1.54732e-16	-0.457799	0.728	0.73	3.09464e-13	5	Soat1
3.41288e-16	-0.34952	0.574	0.614	6.82576e-13	5	Tpx2
9.35216e-16	-0.333221	0.652	0.73	1.87043e-12	5	Cavin2
1.41739e-15	-0.279326	0.756	0.76	2.83478e-12	5	Slc29a1
1.00643e-14	-0.313673	0.661	0.659	2.01286e-11	5	Mustn1
1.63634e-14	-0.408419	0.581	0.617	3.27268e-11	5	Me1
5.41034e-14	-0.395222	0.656	0.688	1.08207e-10	5	Fdxr
1.32076e-13	-0.279218	0.453	0.521	2.64153e-10	5	Vcan
2.10643e-13	-0.320558	0.649	0.676	4.21286e-10	5	Birc5
2.33191e-13	-0.761784	0.794	0.776	4.66381e-10	5	Id2
4.56678e-13	-0.3305	0.598	0.657	9.13356e-10	5	Ube2c
1.03328e-12	-0.25849	0.837	0.849	2.06655e-09	5	Fhl2
1.92659e-12	-0.280795	0.575	0.608	3.85317e-09	5	Cd9
3.0957e-12	-0.433788	0.611	0.585	6.19139e-09	5	Sh3bgr
5.10531e-12	-0.334912	0.902	0.875	1.02106e-08	5	Ran
5.52722e-12	-0.301316	0.73	0.746	1.10544e-08	5	2810474O19Rik
1.27153e-11	-1.8879	0.759	0.745	2.54305e-08	5	Myh11
1.96243e-11	-0.495144	0.94	0.924	3.92485e-08	5	Flna
4.58727e-11	-1.38948	0.676	0.675	9.17454e-08	5	Cnn1
6.00387e-11	-0.335864	0.613	0.66	1.20077e-07	5	Nexn
4.23797e-10	-0.681102	0.853	0.84	8.47595e-07	5	Map1b
4.40466e-10	-0.678588	0.647	0.661	8.80933e-07	5	Hmgb2
1.0721e-09	-1.22055	0.653	0.676	2.14421e-06	5	Aldh1a1
1.07941e-09	-0.457569	0.626	0.643	2.15882e-06	5	Mki67
2.471e-09	-0.352963	0.703	0.694	4.94199e-06	5	Fabp5
5.04358e-08	-0.486531	0.519	0.565	0.000100872	5	Fdx1
5.51334e-08	-0.291602	0.615	0.607	0.000110267	5	Fam213a
6.38137e-08	-0.46923	0.234	0.298	0.000127627	5	Hbb-bs
3.37398e-07	-0.301885	0.682	0.678	0.000674796	5	Selenoh
3.7634e-07	-0.293511	0.703	0.651	0.000752681	5	Gsta2
6.14625e-07	-0.275011	0.589	0.49	0.00122925	5	Cenpa
6.97756e-07	-0.996233	0.43	0.458	0.00139551	5	Cyp11a1
1.00452e-06	-0.294091	0.651	0.677	0.00200905	5	4930523C07Rik
2.83361e-06	-0.642004	0.88	0.845	0.00566723	5	Clu
4.16207e-06	-0.288711	0.686	0.707	0.00832414	5	Thbd
6.95295e-06	-0.437865	0.998	0.994	0.0139059	5	Myl6
1.45477e-05	-0.30335	0.718	0.696	0.0290953	5	6030408B16Rik
1.93563e-05	-0.341571	0.813	0.781	0.0387125	5	Gem
2.00046e-05	-0.311258	0.973	0.937	0.0400093	5	Csrp1
2.55386e-05	-0.530446	0.747	0.751	0.0510773	5	Col15a1
3.39128e-05	-0.451558	0.831	0.766	0.0678256	5	Fhl1
4.70489e-05	-0.282063	0.843	0.8	0.0940979	5	Akap12
0.000124064	-0.279405	0.599	0.565	0.248128	5	Sorbs2
0.000131233	-1.31792	0.975	0.892	0.262467	5	Acta2
0.000141519	-0.279234	0.788	0.784	0.283038	5	Fxyd6
0.000159513	-0.409683	0.589	0.586	0.319025	5	Prc1
0.000218965	-0.924284	0.971	0.946	0.43793	5	Mylk
0.000906376	-0.403588	0.867	0.84	1	5	Nr4a2
0.00233629	-0.480861	0.686	0.605	1	5	Tnnt2
0.00264495	-0.328717	0.685	0.64	1	5	Pank1
0.00299785	-0.589026	0.792	0.69	1	5	Fbxl22
0.00309662	-1.84332	0.693	0.644	1	5	Actg2
0.00396841	-0.750272	0.891	0.838	1	5	Stmn1
0.0051382	-0.269808	0.617	0.601	1	5	Lmnb1
0.00699597	-1.04815	0.965	0.93	1	5	Tpm2
3.72377e-295	0.990691	0.998	0.982	7.44754e-292	6	Cfh
2.79162e-233	-1.04243	0.747	0.934	5.58324e-230	6	Tubb4b
1.37376e-227	-1.10985	0.884	0.987	2.74752e-224	6	Fosb
8.25358e-222	-0.933135	0.373	0.811	1.65072e-218	6	Zfp36
1.61543e-201	-1.18393	0.898	0.987	3.23085e-198	6	Fos
1.81655e-196	-1.15024	0.89	0.958	3.63311e-193	6	Lmna
2.82498e-191	0.796539	0.995	0.997	5.64995e-188	6	Gm42418
2.46662e-190	-1.1226	0.661	0.875	4.93324e-187	6	Klf6
6.79611e-179	0.712322	0.996	0.991	1.35922e-175	6	Itih5
6.22593e-177	0.881747	0.931	0.818	1.24519e-173	6	Txnip
1.7679e-175	-0.775994	0.854	0.965	3.5358e-172	6	Ube2s
1.51798e-174	-0.624145	0.505	0.754	3.03595e-171	6	Sgk1
5.74699e-169	-0.734067	0.702	0.852	1.1494e-165	6	Tubb6
1.29079e-164	-0.83259	0.826	0.92	2.58157e-161	6	Dusp1
6.28913e-159	-0.756128	0.878	0.958	1.25783e-155	6	Ldha
5.58429e-158	-0.791473	0.619	0.795	1.11686e-154	6	Gem
2.03776e-149	-0.855382	0.836	0.883	4.07552e-146	6	Irf1
1.03505e-147	0.781746	0.995	0.962	2.07009e-144	6	Mgp
3.40838e-146	-0.340467	0.337	0.632	6.81676e-143	6	Cdca8
9.06059e-145	-1.13553	0.842	0.904	1.81212e-141	6	Ier3
2.69891e-136	-0.818389	0.675	0.8	5.39783e-133	6	Gm26532
1.50667e-134	-0.490062	0.587	0.743	3.01333e-131	6	Nfkbiz
1.91385e-132	-1.10479	0.756	0.841	3.8277e-129	6	Adamts4
1.93352e-132	-0.636414	0.618	0.844	3.86705e-129	6	Jpt1
7.04956e-131	-0.541443	0.46	0.764	1.40991e-127	6	Osr2
1.3997e-130	0.814039	0.948	0.872	2.7994e-127	6	Kcnk2
9.89638e-128	-0.332558	0.51	0.677	1.97928e-124	6	Tuba1c
1.25863e-126	0.975579	0.975	0.949	2.51726e-123	6	Mfap4
1.42062e-126	-0.530144	0.715	0.78	2.84123e-123	6	Usp2
2.37244e-126	-0.592625	0.744	0.828	4.74487e-123	6	Hk2
8.28875e-126	-0.728124	0.558	0.787	1.65775e-122	6	Ier5
3.35404e-125	-0.570873	0.623	0.827	6.70809e-122	6	Nasp
3.99846e-124	0.646812	0.97	0.944	7.99692e-121	6	Serping1
7.76253e-124	-1.00761	0.696	0.874	1.55251e-120	6	Rgs2
3.79051e-120	-0.637716	0.731	0.813	7.58101e-117	6	Odc1
9.86247e-120	-0.496267	0.357	0.629	1.97249e-116	6	Tnnt2
3.73717e-116	0.913835	0.933	0.863	7.47433e-113	6	Lum
3.86823e-115	-0.567595	0.949	0.986	7.73646e-112	6	Gapdh
2.28395e-112	-0.711515	0.788	0.937	4.56791e-109	6	Tuba1b
1.36998e-107	-0.470341	0.748	0.762	2.73995e-104	6	Dusp5
5.55612e-107	-0.415118	0.755	0.812	1.11122e-103	6	Wfdc1
3.76748e-106	-0.946566	0.798	0.882	7.53496e-103	6	Neat1
2.51209e-105	-0.252268	0.235	0.506	5.02419e-102	6	Tcim
1.58366e-104	0.788309	0.974	0.956	3.16733e-101	6	Rarres2
2.79937e-101	-0.655729	0.416	0.651	5.59874e-98	6	Hspb1
6.53044e-98	0.485947	0.955	0.922	1.30609e-94	6	Gsn
2.40345e-96	0.771557	0.982	0.95	4.80691e-93	6	Dcn
1.10507e-95	-0.500182	0.525	0.675	2.21015e-92	6	Pde10a
4.22179e-95	-0.70015	0.709	0.865	8.44357e-92	6	Nfkbia
3.80232e-92	-0.61818	0.64	0.718	7.60464e-89	6	Egr2
1.03188e-91	0.657368	0.972	0.926	2.06376e-88	6	Pmepa1
1.1453e-91	-0.635713	0.567	0.66	2.29059e-88	6	Nr4a3
2.05886e-91	-0.576657	0.67	0.797	4.11771e-88	6	Pnp
2.72675e-91	0.66129	0.942	0.872	5.4535e-88	6	Htra3
6.87031e-91	-0.618735	0.628	0.817	1.37406e-87	6	Timp3
6.7125e-89	-0.927802	0.877	0.885	1.3425e-85	6	Pim1
3.941e-88	-0.554653	0.64	0.73	7.88201e-85	6	Adamts9
2.78538e-87	-0.590359	0.728	0.741	5.57075e-84	6	Cdkn1a
4.53992e-85	-0.637105	0.812	0.901	9.07985e-82	6	Socs3
1.13576e-82	-0.976582	0.958	0.985	2.27152e-79	6	Tpm1
1.95622e-82	0.694775	0.814	0.708	3.91244e-79	6	Tcf21
5.88822e-80	-0.603902	0.629	0.732	1.17764e-76	6	Errfi1
1.0418e-79	0.493551	0.906	0.805	2.08361e-76	6	Wnt4
3.82388e-76	-0.44385	0.484	0.702	7.64777e-73	6	Arrdc3
2.60981e-74	0.493354	0.972	0.932	5.21962e-71	6	Ogn
2.98556e-74	-0.850863	0.702	0.858	5.97113e-71	6	Cebpd
8.34477e-73	0.394975	0.964	0.972	1.66895e-69	6	Ctsl
3.98196e-71	-0.387357	0.518	0.753	7.96393e-68	6	Myadm
3.82372e-69	-0.483454	0.556	0.716	7.64744e-66	6	H2afx
4.22062e-69	-0.439776	0.464	0.63	8.44124e-66	6	Scarb1
5.20397e-67	-0.433459	0.458	0.595	1.04079e-63	6	Prc1
1.05156e-66	-0.266402	0.441	0.627	2.10312e-63	6	Rangap1
8.64325e-66	-0.580759	0.791	0.893	1.72865e-62	6	Hspd1
9.5249e-64	-0.642282	0.923	0.978	1.90498e-60	6	H2afz
3.11548e-62	-0.490457	0.84	0.893	6.23097e-59	6	Ccnd2
6.42223e-62	-0.348608	0.765	0.919	1.28445e-58	6	Ywhaq
1.07358e-61	-0.385581	0.695	0.77	2.14717e-58	6	Rasl11b
2.0398e-61	-0.403022	0.531	0.639	4.07961e-58	6	Trib2
4.24903e-61	0.462902	0.972	0.924	8.49807e-58	6	Mmp2
7.49744e-61	-0.450136	0.596	0.795	1.49949e-57	6	Cnn2
1.29672e-59	-0.413972	0.755	0.708	2.59344e-56	6	Trib1
2.70547e-58	-0.52376	0.47	0.61	5.41094e-55	6	Pcp4l1
3.68874e-58	-0.279568	0.436	0.639	7.37748e-55	6	Phlda1
5.06812e-58	-0.346932	0.623	0.708	1.01362e-54	6	Tnfrsf12a
6.0678e-58	0.502748	0.915	0.927	1.21356e-54	6	Htra1
2.44406e-57	-0.335497	0.531	0.649	4.88812e-54	6	Sorbs1
3.15526e-57	-0.497097	0.94	0.984	6.31052e-54	6	Lgals1
2.17627e-56	0.378779	0.952	0.961	4.35254e-53	6	Rbp1
5.64602e-56	-0.622471	0.536	0.671	1.1292e-52	6	Rasl11a
8.94128e-56	0.463964	0.959	0.949	1.78826e-52	6	Mdk
1.71652e-55	-0.424902	0.689	0.767	3.43303e-52	6	Smtn
2.20225e-55	-0.695809	0.831	0.864	4.4045e-52	6	Icam1
1.47668e-54	-0.363693	0.554	0.695	2.95337e-51	6	Fdxr
1.55483e-54	-0.472872	0.46	0.599	3.10967e-51	6	Cenpf
3.25803e-54	-0.487283	0.76	0.885	6.51605e-51	6	Ran
7.18538e-54	-0.277021	0.679	0.769	1.43708e-50	6	Glipr2
7.87037e-54	-0.387188	0.602	0.678	1.57407e-50	6	Crem
1.37775e-53	-0.31358	0.59	0.789	2.75549e-50	6	Manf
1.4698e-53	-0.330562	0.47	0.693	2.93961e-50	6	Selenoh
2.06644e-53	0.300651	0.732	0.507	4.13288e-50	6	Dpep1
3.23541e-53	0.480513	0.901	0.899	6.47083e-50	6	Selenop
3.51703e-53	-0.505711	0.439	0.607	7.03405e-50	6	Ednrb
4.69316e-51	-0.533047	0.461	0.588	9.38632e-48	6	Plk2
7.52413e-51	-0.312451	0.541	0.669	1.50483e-47	6	1500009L16Rik
5.7806e-50	-0.443354	0.74	0.895	1.15612e-46	6	Gstm2
9.89685e-50	-0.327299	0.679	0.793	1.97937e-46	6	Akr1b8
2.16006e-49	-0.314212	0.41	0.574	4.32012e-46	6	Enpep
7.30909e-49	-0.518958	0.63	0.645	1.46182e-45	6	Zdbf2
3.00159e-48	-0.441347	0.772	0.818	6.00319e-45	6	Bpgm
4.79423e-48	-0.31125	0.514	0.666	9.58846e-45	6	Emp1
4.09545e-47	0.419942	0.899	0.801	8.19089e-44	6	Gpx3
8.21395e-46	-0.43217	0.65	0.794	1.64279e-42	6	Kcnq1ot1
9.00509e-46	-0.69834	0.488	0.673	1.80102e-42	6	Hmgb2
3.18328e-45	-0.274112	0.422	0.595	6.36655e-42	6	Gata6
4.45349e-44	-0.264467	0.655	0.747	8.90698e-41	6	Nhsl2
4.94605e-44	-0.574846	0.812	0.91	9.89211e-41	6	Tacc1
6.09977e-44	-0.252632	0.324	0.476	1.21995e-40	6	Prlr
3.17162e-43	0.51495	0.816	0.751	6.34324e-40	6	Pdgfra
3.26562e-43	0.527159	0.919	0.866	6.53125e-40	6	Col11a1
9.99315e-43	0.607314	0.988	0.991	1.99863e-39	6	Apoe
1.12429e-42	0.439996	0.808	0.741	2.24858e-39	6	Bcat1
3.65224e-42	-0.85086	0.785	0.846	7.30447e-39	6	Stmn1
7.8029e-42	-1.21753	0.934	0.957	1.56058e-38	6	Myl9
1.21708e-41	-1.21071	0.564	0.683	2.43417e-38	6	Aldh1a1
2.46748e-40	-0.414951	0.491	0.594	4.93496e-37	6	Sh3bgr
4.44148e-40	-0.313022	0.642	0.791	8.88296e-37	6	Sat1
7.07078e-40	0.564789	0.844	0.776	1.41416e-36	6	Fbln1
1.03751e-39	0.53972	0.837	0.815	2.07503e-36	6	Socs2
8.79278e-39	-0.451097	0.551	0.648	1.75856e-35	6	Mki67
1.80032e-38	-0.40529	0.602	0.608	3.60064e-35	6	Egr3
1.91557e-38	-0.438265	0.718	0.813	3.83114e-35	6	Gja1
2.33332e-38	-0.3261	0.756	0.601	4.66663e-35	6	Tpx2
2.64236e-38	0.408707	0.688	0.55	5.28472e-35	6	Gm26802
3.43562e-37	-0.634436	0.704	0.796	6.87125e-34	6	Ckb
4.46706e-37	-0.30471	0.761	0.846	8.93412e-34	6	Cited2
1.02469e-36	-0.437397	0.506	0.627	2.04938e-33	6	Pclaf
3.99183e-36	0.775118	0.676	0.636	7.98366e-33	6	Clec1a
4.18066e-36	-0.443634	0.746	0.801	8.36131e-33	6	Ugdh
6.27695e-36	-0.892686	0.643	0.705	1.25539e-32	6	Acsbg1
1.15064e-35	-0.285033	0.595	0.761	2.30128e-32	6	Ranbp1
1.44758e-35	-0.268375	0.569	0.654	2.89517e-32	6	Isg15
1.73534e-35	-0.267133	0.472	0.593	3.47067e-32	6	Psd
9.81637e-35	-0.449567	0.417	0.572	1.96327e-31	6	Fdx1
1.17306e-34	0.496716	0.771	0.74	2.34612e-31	6	Pdgfrb
2.7233e-34	-0.277666	0.545	0.65	5.44661e-31	6	Pank1
3.46559e-34	-0.319035	0.512	0.626	6.93117e-31	6	Pkdcc
6.06843e-34	-0.55602	0.897	0.927	1.21369e-30	6	Flna
8.76215e-34	0.300811	0.988	0.977	1.75243e-30	6	Bgn
1.17178e-33	-0.456899	0.845	0.876	2.34356e-30	6	Tagln2
1.58026e-33	0.439537	0.709	0.601	3.16053e-30	6	Cd34
2.01213e-32	-1.21532	0.867	0.937	4.02427e-29	6	Tpm2
4.44704e-32	0.297305	0.977	0.946	8.89409e-29	6	Cygb
1.21611e-31	0.306267	0.7	0.595	2.43223e-28	6	Adamtsl2
2.55042e-31	-0.706854	0.832	0.841	5.10085e-28	6	Map1b
3.18345e-31	0.266181	0.798	0.682	6.3669e-28	6	Dock4
3.65695e-31	-0.313612	0.815	0.91	7.3139e-28	6	Maged2
5.90417e-31	-0.268199	0.439	0.534	1.18083e-27	6	Tnfaip6
1.24628e-30	-0.43986	0.391	0.517	2.49255e-27	6	Rasd1
3.94801e-30	-0.336615	0.611	0.666	7.89602e-27	6	Bhlhe40
2.8175e-29	0.445413	0.965	0.935	5.635e-26	6	Ifitm1
6.58377e-29	-0.527635	0.954	0.975	1.31675e-25	6	Tmsb4x
7.84337e-29	0.303001	0.841	0.713	1.56867e-25	6	Loxl2
7.95462e-29	-0.469078	0.761	0.736	1.59092e-25	6	Hhip
7.17191e-27	-0.25276	0.489	0.621	1.43438e-23	6	Id1
1.11688e-26	-0.330191	0.625	0.738	2.23375e-23	6	Soat1
1.57294e-26	0.322927	0.91	0.914	3.14589e-23	6	Sparcl1
4.50483e-26	-0.717995	0.522	0.625	9.00967e-23	6	Stc1
5.93403e-26	-0.303178	0.656	0.697	1.18681e-22	6	Fabp5
6.99647e-26	0.545317	0.738	0.721	1.39929e-22	6	Actr3b
3.03682e-25	0.331717	0.875	0.806	6.07363e-22	6	Ccdc80
6.75274e-25	0.40558	0.855	0.794	1.35055e-21	6	Sfrp1
1.92845e-24	-0.527798	0.944	0.972	3.85691e-21	6	Col4a1
3.47449e-24	0.349575	0.88	0.821	6.94899e-21	6	Gm26917
4.48246e-24	0.422644	0.806	0.741	8.96493e-21	6	Igf1
7.62938e-24	-0.659362	0.495	0.56	1.52588e-20	6	Des
8.08308e-24	0.385285	0.594	0.487	1.61662e-20	6	G0s2
3.81591e-23	0.518744	0.769	0.745	7.63181e-20	6	Matn2
5.21274e-23	0.772483	0.777	0.784	1.04255e-19	6	Cxcl12
9.40303e-23	-0.329163	0.505	0.582	1.88061e-19	6	Alas1
2.17701e-22	-0.27118	0.747	0.774	4.35402e-19	6	Gm13889
9.09661e-22	0.283637	0.804	0.765	1.81932e-18	6	Ank2
3.82398e-21	-0.261875	0.377	0.492	7.64796e-18	6	Msmo1
8.04825e-21	0.394906	0.792	0.737	1.60965e-17	6	Mmp11
2.74009e-20	-0.300498	0.771	0.878	5.48018e-17	6	Cavin3
3.20806e-20	-0.331089	0.71	0.68	6.41611e-17	6	Gm17056
1.1382e-19	0.320882	0.742	0.674	2.27639e-16	6	Nrxn1
3.77505e-19	-0.794995	0.695	0.697	7.55011e-16	6	Fbxl22
3.91166e-19	-0.323692	0.608	0.656	7.82332e-16	6	Ube2c
1.47965e-18	0.253855	0.971	0.956	2.95929e-15	6	Igfbp6
1.84102e-18	0.374601	0.743	0.729	3.68204e-15	6	Srpx2
2.25758e-18	0.280785	0.62	0.529	4.51517e-15	6	Tnc
5.20782e-18	-0.260992	0.343	0.492	1.04156e-14	6	Bambi
8.78716e-18	0.33625	0.786	0.775	1.75743e-14	6	Ddit4l
1.40621e-17	0.288025	0.781	0.797	2.81241e-14	6	Col6a3
2.76658e-17	-0.25537	0.865	0.938	5.53315e-14	6	Tuba1a
3.38502e-17	-0.362224	0.79	0.884	6.77003e-14	6	Lpp
8.12718e-17	-0.272631	0.612	0.66	1.62544e-13	6	Nexn
4.30178e-16	0.347902	0.857	0.802	8.60357e-13	6	Hoxd9
1.06192e-15	-0.276017	0.554	0.603	2.12383e-12	6	Hmgcs1
1.32561e-15	-0.283258	0.602	0.663	2.65122e-12	6	Mustn1
8.99234e-15	-0.250127	0.683	0.646	1.79847e-11	6	Hbegf
4.45187e-14	0.294447	0.735	0.701	8.90373e-11	6	Lrrc17
4.72724e-14	-0.85898	0.929	0.95	9.45449e-11	6	Mylk
5.57039e-14	0.267422	0.689	0.634	1.11408e-10	6	Ntng1
5.84126e-14	0.260819	0.783	0.743	1.16825e-10	6	Tmem119
6.38514e-14	-0.512787	0.803	0.713	1.27703e-10	6	Cd24a
8.49799e-14	0.383929	0.625	0.58	1.6996e-10	6	Ms4a4d
1.10875e-13	-0.388442	0.703	0.688	2.2175e-10	6	Cav1
5.37485e-13	0.347493	0.572	0.523	1.07497e-09	6	Clec14a
6.44877e-13	0.326395	0.9	0.83	1.28975e-09	6	Col4a4
2.16461e-12	-0.288811	0.587	0.603	4.32922e-09	6	Lmnb1
4.10273e-12	-0.661708	0.748	0.696	8.20546e-09	6	Top2a
7.12791e-12	-0.279378	0.97	0.975	1.42558e-08	6	Vim
8.9789e-12	-0.302666	0.914	0.942	1.79578e-08	6	Col4a2
1.3271e-11	-0.313462	0.849	0.876	2.65419e-08	6	Csrp2
2.47825e-11	-0.655547	0.778	0.715	4.9565e-08	6	Cxcl10
3.3528e-11	-0.935127	0.398	0.46	6.70559e-08	6	Cyp11a1
4.84658e-11	-0.703045	0.673	0.69	9.69317e-08	6	Lmod1
1.02558e-10	-0.639101	0.983	0.995	2.05116e-07	6	Myl6
1.10783e-10	0.308749	0.776	0.723	2.21566e-07	6	Arhgap29
1.11452e-10	-0.306007	0.809	0.786	2.22904e-07	6	Lamc3
2.28048e-10	-0.372054	0.62	0.614	4.56095e-07	6	Me1
3.07666e-10	0.417577	0.776	0.782	6.15332e-07	6	Cxcl14
3.84244e-10	0.314038	0.704	0.667	7.68488e-07	6	Thbs4
6.45232e-10	0.349749	0.788	0.806	1.29046e-06	6	Serpine2
1.35721e-09	-0.305141	0.826	0.746	2.71442e-06	6	Col15a1
3.13598e-09	0.26384	0.879	0.903	6.27195e-06	6	Nupr1
4.516e-09	-0.433464	0.728	0.688	9.032e-06	6	Prss35
5.16708e-09	-0.367127	0.393	0.456	1.03342e-05	6	Cyp17a1
1.9298e-08	-0.260329	0.51	0.535	3.8596e-05	6	Smc2
8.32126e-08	0.311661	0.653	0.644	0.000166425	6	Dnm3os
1.29396e-07	0.272715	0.682	0.712	0.000258791	6	Hspa1a
2.60568e-07	-0.290617	0.494	0.497	0.000521135	6	Ptn
3.56939e-07	0.368361	0.803	0.776	0.000713879	6	Nrp1
3.90729e-07	-0.456182	0.261	0.296	0.000781457	6	Hbb-bs
6.10441e-07	-0.273856	0.551	0.556	0.00122088	6	Cks2
7.40374e-07	0.451515	0.421	0.494	0.00148075	6	Lrat
1.5019e-06	-0.506771	0.925	0.94	0.0030038	6	Csrp1
3.78176e-06	-0.278791	0.748	0.648	0.00756353	6	Gsta2
5.13554e-06	0.345082	0.643	0.634	0.0102711	6	Wnt5a
6.26205e-05	-0.388118	0.792	0.749	0.125241	6	Cxcl1
0.000215113	0.259037	0.58	0.573	0.430225	6	Lbp
0.00031277	0.260837	0.66	0.682	0.62554	6	Lhfp
0.000529901	-0.319959	0.73	0.759	1	6	Eln
0.000602159	-0.304194	0.622	0.575	1	6	Mt2
0.000756791	-0.300127	0.722	0.669	1	6	Mmd2
0.00313677	-0.311845	0.652	0.583	1	6	Cenpe
0.00357557	-0.257251	0.59	0.546	1	6	Bpifb4
0.00567723	0.296836	0.637	0.683	1	6	Abca8a
0.00677231	0.330455	0.587	0.575	1	6	Aspn
1.24209e-223	1.17996	0.971	0.899	2.48417e-220	7	Tacc1
4.79414e-175	0.633803	0.999	0.991	9.58829e-172	7	Itih5
4.91377e-168	0.801664	0.987	0.925	9.82753e-165	7	Pmepa1
2.012e-156	0.730008	0.969	0.871	4.024e-153	7	Kcnk2
9.71189e-156	1.09689	0.95	0.857	1.94238e-152	7	Rgs2
2.75997e-150	1.16485	0.929	0.837	5.51994e-147	7	Nr4a2
6.70263e-145	0.850411	0.852	0.653	1.34053e-141	7	Pde10a
3.60524e-127	0.524842	0.997	0.982	7.21049e-124	7	Cfh
6.35575e-100	-0.283421	0.231	0.501	1.27115e-96	7	Postn
7.44795e-98	0.763659	0.985	0.951	1.48959e-94	7	Klf4
8.5001e-96	0.552013	0.805	0.723	1.70002e-92	7	Bdnf
4.04466e-94	0.342557	0.775	0.591	8.08931e-91	7	Adamtsl2
9.77022e-91	0.717785	0.934	0.847	1.95404e-87	7	Gm12840
4.15601e-89	0.574971	0.72	0.527	8.31202e-86	7	Ell2
1.01462e-88	0.599002	0.936	0.865	2.02923e-85	7	Col11a1
2.2878e-88	0.805086	0.936	0.871	4.57561e-85	7	Adamts1
1.03107e-87	0.749257	0.82	0.678	2.06213e-84	7	Arrdc3
7.24581e-86	0.7609	0.896	0.832	1.44916e-82	7	Adamts4
1.23537e-78	0.261664	0.879	0.737	2.47075e-75	7	Tmem119
6.09365e-75	-0.308213	0.689	0.785	1.21873e-71	7	Crip2
1.26404e-67	0.606371	0.892	0.802	2.52808e-64	7	Thbs1
1.39488e-64	-0.769976	0.978	0.973	2.78977e-61	7	Tmsb4x
2.49579e-63	0.877677	0.724	0.57	4.99158e-60	7	Plk2
7.91177e-63	0.309064	0.987	0.948	1.58235e-59	7	Mfap4
3.22707e-61	0.428777	0.823	0.724	6.45415e-58	7	Srpx2
4.69202e-57	-0.601606	0.997	0.995	9.38404e-54	7	Igfbp7
1.06679e-56	0.431734	0.849	0.771	2.13357e-53	7	Usp2
2.59987e-56	0.446276	0.755	0.632	5.19973e-53	7	Clec1a
3.78632e-55	0.346479	0.803	0.661	7.57264e-52	7	Arhgap28
6.38552e-55	0.299859	0.914	0.805	1.2771e-51	7	Wnt4
5.73219e-54	-0.268306	0.772	0.658	1.14644e-50	7	Dpt
1.31332e-52	-0.365926	0.561	0.68	2.62663e-49	7	Mmd2
2.23692e-50	-0.55968	0.826	0.894	4.47385e-47	7	Selenom
3.9354e-50	0.374157	0.989	0.955	7.8708e-47	7	Rarres2
5.55107e-50	-0.382589	0.563	0.748	1.11021e-46	7	Rhoj
8.17269e-50	-0.526487	0.626	0.693	1.63454e-46	7	Cav1
1.10599e-49	0.287806	0.981	0.924	2.21198e-46	7	Mmp2
2.19227e-49	0.600543	0.715	0.65	4.38454e-46	7	Nr4a3
3.27222e-49	-0.914102	0.989	0.983	6.54444e-46	7	Tpm1
5.87327e-48	0.563559	0.874	0.802	1.17465e-44	7	Gja1
8.12175e-48	-0.314558	0.809	0.819	1.62435e-44	7	Ucp2
8.48084e-47	-0.662702	0.781	0.854	1.69617e-43	7	Aebp1
1.10431e-44	-0.520977	0.639	0.724	2.20862e-41	7	Cd24a
2.333e-43	0.387719	0.854	0.801	4.666e-40	7	Serpine2
2.19055e-42	0.325488	0.965	0.92	4.38109e-39	7	Bicc1
1.05859e-41	-0.352815	0.506	0.628	2.11717e-38	7	Mest
1.34803e-41	0.311082	0.786	0.662	2.69607e-38	7	Thbs4
1.41951e-40	-0.515521	0.556	0.699	2.83902e-37	7	Prss35
3.5264e-40	0.305664	0.717	0.588	7.0528e-37	7	Bmp2
4.83393e-40	0.252114	0.997	0.982	9.66786e-37	7	Akr1cl
4.46977e-39	0.420411	0.795	0.771	8.93955e-36	7	Gm13889
5.7112e-39	-0.273398	0.363	0.535	1.14224e-35	7	Pdlim3
1.32511e-38	0.324379	0.845	0.739	2.65022e-35	7	Fbn2
4.89563e-38	-0.524817	0.977	0.98	9.79126e-35	7	Ifitm3
1.43945e-37	-0.542376	0.726	0.842	2.87891e-34	7	Col4a4
2.69006e-37	-0.2646	0.441	0.6	5.38013e-34	7	Cks1b
4.60683e-37	-0.416849	0.474	0.624	9.21366e-34	7	Me1
5.12522e-37	-0.661673	0.866	0.897	1.02504e-33	7	Socs3
5.38822e-37	-0.412357	0.489	0.627	1.07764e-33	7	Pkdcc
1.18052e-36	0.264121	0.978	0.956	2.36103e-33	7	Ube2s
2.06342e-36	-0.402858	0.504	0.626	4.12684e-33	7	Scarb1
2.22349e-36	-0.520416	0.98	0.981	4.44697e-33	7	Lgals1
2.57912e-36	-0.266593	0.786	0.534	5.15824e-33	7	Bpifb4
1.42302e-35	0.365437	0.792	0.664	2.84603e-32	7	Cyp1b1
2.81641e-35	-0.501371	0.581	0.613	5.63282e-32	7	Tnnt2
7.66723e-34	0.315433	0.934	0.899	1.53345e-30	7	Nupr1
9.0106e-34	0.423058	0.689	0.641	1.80212e-30	7	Zdbf2
6.83907e-33	-0.281698	0.565	0.658	1.36781e-29	7	Ube2c
1.28924e-32	-0.394939	0.333	0.475	2.57848e-29	7	Prlr
1.59398e-32	-0.423954	0.694	0.767	3.18797e-29	7	Smtn
1.84023e-32	0.339093	0.712	0.598	3.68046e-29	7	1190002N15Rik
3.71209e-32	-0.52139	0.727	0.81	7.42418e-29	7	Timp3
4.6265e-32	-0.351207	0.526	0.617	9.253e-29	7	Tpx2
9.35244e-31	-0.431199	0.721	0.739	1.87049e-27	7	Ifi27l2a
5.82539e-30	-0.391885	0.534	0.648	1.16508e-26	7	Ncam1
3.34433e-29	0.491895	0.763	0.721	6.68865e-26	7	Adamts9
1.45441e-28	-0.526102	0.894	0.914	2.90881e-25	7	Pcolce
7.58177e-28	0.37339	0.802	0.762	1.51635e-24	7	Rasl11b
8.62874e-28	-0.361102	0.962	0.96	1.72575e-24	7	Hmgb1
8.7748e-28	-0.87673	0.614	0.706	1.75496e-24	7	Acsbg1
1.10005e-27	-0.45909	0.494	0.626	2.2001e-24	7	Gas1
1.35364e-27	0.292901	0.764	0.667	2.70727e-24	7	Crem
5.66412e-27	-0.267172	0.565	0.667	1.13282e-23	7	1500009L16Rik
8.24654e-27	0.261704	0.787	0.697	1.64931e-23	7	Tnfrsf12a
8.86004e-26	0.378703	0.962	0.952	1.77201e-22	7	Lmna
1.64303e-25	-0.736257	0.479	0.561	3.28606e-22	7	Des
2.09177e-25	-0.380828	0.332	0.46	4.18353e-22	7	Cyp17a1
2.10462e-25	-0.337129	0.624	0.731	4.20924e-22	7	Cavin2
2.24677e-25	0.307316	0.64	0.581	4.49354e-22	7	Hmga2
3.89867e-25	-0.425253	0.821	0.874	7.79735e-22	7	Cavin3
6.83937e-25	-0.507156	0.522	0.624	1.36787e-21	7	Hspa1b
3.35463e-24	-0.31927	0.515	0.607	6.70926e-21	7	Lmnb1
3.67979e-24	0.374043	0.959	0.947	7.35957e-21	7	Gadd45b
4.1896e-24	-0.298944	0.758	0.826	8.37919e-21	7	Hk2
9.78883e-24	0.253396	0.908	0.871	1.95777e-20	7	Agt
1.78998e-23	0.642115	0.797	0.774	3.57996e-20	7	Ddit4l
2.33561e-23	-0.251179	0.475	0.577	4.67122e-20	7	Slc6a6
2.81972e-23	0.32923	0.603	0.499	5.63944e-20	7	Col12a1
7.42006e-23	-0.530677	0.936	0.941	1.48401e-19	7	Col4a2
5.84943e-22	0.281433	0.978	0.963	1.16989e-18	7	Sox4
7.87915e-22	-0.425029	0.94	0.943	1.57583e-18	7	Col6a2
1.22215e-21	-0.340366	0.961	0.971	2.44431e-18	7	Col6a1
4.23845e-21	-0.406234	0.856	0.882	8.47689e-18	7	Irf1
4.25966e-21	0.299181	0.969	0.929	8.51932e-18	7	Dnajb1
5.7084e-21	-0.452159	0.512	0.595	1.14168e-17	7	Cenpf
7.60337e-21	-1.3216	0.641	0.677	1.52067e-17	7	Aldh1a1
9.06485e-21	-0.324402	0.871	0.906	1.81297e-17	7	Maged2
1.58782e-20	-0.468909	0.557	0.648	3.17564e-17	7	Tgfbi
1.22568e-19	-0.30655	0.903	0.925	2.45135e-16	7	Fstl1
1.68214e-19	0.255576	0.843	0.794	3.36427e-16	7	Ugdh
2.34008e-19	-0.587253	0.711	0.72	4.68015e-16	7	Cxcl10
5.6595e-19	-1.27065	0.941	0.931	1.1319e-15	7	Tpm2
6.76149e-19	-0.604196	0.976	0.97	1.3523e-15	7	Col4a1
1.08441e-18	-0.321162	0.993	0.993	2.16882e-15	7	Cald1
1.08458e-18	-0.265509	0.411	0.503	2.16915e-15	7	Ptn
3.78737e-18	-0.611801	0.988	0.984	7.57474e-15	7	Col3a1
4.58843e-18	0.296456	0.769	0.731	9.17685e-15	7	Cwc25
6.5356e-18	-0.305808	0.494	0.585	1.30712e-14	7	Filip1l
7.79339e-18	-0.772003	0.995	0.994	1.55868e-14	7	Myl6
9.23756e-18	-0.429172	0.6	0.645	1.84751e-14	7	Mki67
1.17647e-17	-0.365352	0.66	0.735	2.35294e-14	7	Soat1
4.23738e-17	-0.566233	0.826	0.849	8.47477e-14	7	Clu
1.28975e-16	-0.702588	0.752	0.779	2.57951e-13	7	Id2
1.57503e-16	-0.347302	0.713	0.767	3.15005e-13	7	Nucks1
2.24075e-16	-0.401869	0.832	0.825	4.48149e-13	7	Txnip
3.55929e-16	-0.281818	0.997	0.996	7.11859e-13	7	Gm42418
3.91456e-16	-0.348484	0.725	0.788	7.82911e-13	7	Fxyd6
2.16573e-15	-0.395153	0.744	0.577	4.33147e-12	7	Sh3bgr
4.25076e-15	-0.265656	0.697	0.753	8.50153e-12	7	Ranbp1
6.2563e-15	-0.287067	0.552	0.62	1.25126e-11	7	Smc4
9.73421e-15	-0.288841	0.528	0.588	1.94684e-11	7	Psd
3.74461e-14	-0.25246	0.684	0.749	7.48922e-11	7	2810474O19Rik
5.61202e-14	-0.492266	0.963	0.957	1.1224e-10	7	Igfbp6
2.39869e-13	-0.468394	0.857	0.879	4.79738e-10	7	Lpp
2.71789e-13	-0.357099	0.654	0.687	5.43579e-10	7	Lsp1
5.9325e-13	0.283971	0.934	0.898	1.1865e-09	7	Ier3
7.84094e-13	-0.283492	0.857	0.848	1.56819e-09	7	Fhl2
3.08443e-12	-1.11929	0.964	0.955	6.16886e-09	7	Myl9
3.5089e-12	-0.36404	0.878	0.864	7.0178e-09	7	Chchd10
6.49869e-12	-1.02055	0.951	0.948	1.29974e-08	7	Mylk
2.26552e-11	-0.759914	0.941	0.953	4.53104e-08	7	Dcn
2.43564e-11	-0.264148	0.548	0.59	4.87129e-08	7	Cenpe
5.63839e-11	-0.383552	0.637	0.664	1.12768e-07	7	Rasl11a
1.00798e-10	-0.991856	0.404	0.46	2.01597e-07	7	Cyp11a1
1.46773e-10	-0.262421	0.671	0.716	2.93547e-07	7	Spats2l
2.71984e-10	-1.89944	0.749	0.746	5.43968e-07	7	Myh11
4.69319e-10	-0.353287	0.787	0.778	9.38637e-07	7	Nrp1
7.36694e-10	-0.349095	0.857	0.875	1.47339e-06	7	Tagln2
1.32426e-09	-0.275774	0.726	0.739	2.64853e-06	7	Rras
1.37568e-09	-0.254636	0.689	0.766	2.75137e-06	7	Arl6ip1
1.51056e-09	-0.335001	0.878	0.928	3.02111e-06	7	Klf2
1.62045e-09	-0.312127	0.895	0.875	3.24091e-06	7	Ran
1.91055e-09	-0.250995	0.865	0.861	3.82109e-06	7	Ldhb
2.89101e-09	0.332139	0.589	0.542	5.78202e-06	7	Fzd8
2.97189e-09	-0.32717	0.768	0.782	5.94379e-06	7	Cnn2
6.08646e-09	-0.267373	0.654	0.68	1.21729e-05	7	Selenoh
8.59786e-09	-0.259675	0.694	0.718	1.71957e-05	7	Tmpo
9.42241e-09	-1.37839	0.665	0.676	1.88448e-05	7	Cnn1
1.23518e-08	-0.711321	0.556	0.61	2.47036e-05	7	Meg3
1.73872e-08	-0.275648	0.751	0.783	3.47744e-05	7	Sat1
1.96211e-08	-0.269202	0.76	0.766	3.92422e-05	7	Hjurp
5.1677e-08	-0.260614	0.824	0.807	0.000103354	7	Wfdc1
1.14882e-07	-0.292788	0.772	0.814	0.000229764	7	Ccdc80
4.18411e-07	-0.616852	0.722	0.71	0.000836822	7	Hspa1a
5.24044e-07	-0.295242	0.626	0.633	0.00104809	7	Trib2
5.34998e-07	-0.489943	0.78	0.791	0.00107	7	Ckb
6.55555e-07	-0.522046	0.94	0.939	0.00131111	7	Csrp1
6.76046e-07	-0.43285	0.925	0.925	0.00135209	7	Flna
1.24416e-06	-1.78776	0.918	0.896	0.00248832	7	Acta2
2.65682e-06	-0.34787	0.654	0.631	0.00531365	7	Plac8
3.17232e-06	-0.298841	0.942	0.926	0.00634463	7	Tuba1b
3.86769e-06	-0.277938	0.706	0.721	0.00773539	7	Crip1
3.91702e-06	-0.281829	0.9	0.885	0.00783404	7	Hspd1
5.28958e-06	-0.273696	0.694	0.695	0.0105792	7	Fabp5
6.34023e-06	-0.331951	0.843	0.866	0.0126805	7	Mt1
1.78107e-05	-0.473101	0.26	0.296	0.0356214	7	Hbb-bs
5.89617e-05	-0.350296	0.999	0.999	0.117923	7	Sparc
8.29577e-05	-0.323912	0.885	0.888	0.165915	7	Plpp3
0.000131938	-0.320897	0.726	0.655	0.263877	7	Mustn1
0.000139374	-0.783232	0.868	0.84	0.278748	7	Stmn1
0.000209992	-0.285518	0.692	0.706	0.419983	7	Thbd
0.000283713	-0.420082	0.544	0.563	0.567426	7	Fdx1
0.000486477	-0.512386	0.639	0.662	0.972955	7	Hmgb2
0.000749577	-0.760007	0.786	0.749	1	7	Col15a1
0.00154042	-0.281227	0.908	0.907	1	7	Gadd45g
0.00252833	-0.320681	0.791	0.755	1	7	Eln
0.00256041	-0.261444	0.803	0.787	1	7	Lamc3
0.00270176	-0.258711	0.789	0.783	1	7	Gem
0.00294951	-0.323138	0.772	0.8	1	7	Sfrp1
0.00512977	-0.289512	0.654	0.657	1	7	Nexn
0.00616773	-0.52731	0.581	0.597	1	7	Ednrb
0	3.04361	0.998	0.625	0	8	Actg2
0	3.02006	1	0.827	0	8	Tagln
0	2.97419	0.998	0.73	0	8	Myh11
0	2.93577	1	0.891	0	8	Acta2
0	2.86183	0.997	0.655	0	8	Cnn1
0	2.79959	1	0.928	0	8	Tpm2
0	2.4571	1	0.953	0	8	Myl9
0	2.30047	1	0.945	0	8	Mylk
0	2.04155	0.992	0.678	0	8	Fbxl22
0	2.03702	0.992	0.67	0	8	Lmod1
0	2.02984	1	0.994	0	8	Myl6
0	1.97258	0.921	0.617	0	8	Hspb1
0	1.93111	0.999	0.935	0	8	Csrp1
0	1.86423	0.988	0.778	0	8	Ckb
0	1.86373	1	0.982	0	8	Tpm1
0	1.8506	0.991	0.831	0	8	Map1b
0	1.78021	0.985	0.764	0	8	Id2
0	1.70901	0.904	0.593	0	8	Tnnt2
0	1.68599	0.971	0.577	0	8	Pcp4l1
0	1.59315	0.896	0.577	0	8	Ednrb
0	1.59215	0.999	0.92	0	8	Flna
0	1.54815	0.982	0.757	0	8	Fhl1
0	1.54015	0.953	0.564	0	8	Sh3bgr
0	1.522	0.992	0.871	0	8	Lpp
0	1.37282	0.996	0.933	0	8	Serpinf1
0	1.33502	0.998	0.972	0	8	Tmsb4x
0	1.33068	0.989	0.863	0	8	Cavin3
0	1.30195	0.968	0.673	0	8	Itga1
0	1.22362	0.941	0.639	0	8	Nexn
0	1.195	0.967	0.739	0	8	Ccdc3
0	1.15253	0.971	0.769	0	8	Cnn2
0	1.13882	0.977	0.774	0	8	Palld
0	1.11659	0.926	0.623	0	8	Sorbs1
0	1.09984	1	0.992	0	8	Cald1
0	1.08894	0.901	0.565	0	8	Psd
0	1.08843	0.928	0.674	0	8	Cav1
0	1.06032	0.956	0.621	0	8	Ncam1
0	1.04949	0.924	0.642	0	8	Mustn1
0	0.996532	0.958	0.75	0	8	Smtn
0	0.801565	0.828	0.543	0	8	Filip1
1.30961e-293	1.20993	0.982	0.868	2.61922e-290	8	Csrp2
1.43344e-291	0.506403	0.882	0.638	2.86688e-288	8	Ddah1
2.10272e-287	1.00332	0.938	0.726	4.20545e-284	8	Rras
3.48501e-284	1.14932	0.988	0.884	6.97002e-281	8	Selenom
2.5523e-276	0.683483	0.853	0.69	5.1046e-273	8	Tes
1.57103e-275	1.00905	0.879	0.635	3.14206e-272	8	Foxp2
8.85531e-252	0.725556	0.791	0.462	1.77106e-248	8	Perp
4.08666e-250	1.012	0.916	0.68	8.17332e-247	8	Vldlr
1.22913e-245	1.23086	0.962	0.883	2.45825e-242	8	Plpp3
2.6274e-242	0.667058	0.791	0.55	5.2548e-239	8	Asb2
1.64825e-241	0.459044	0.866	0.579	3.29651e-238	8	Vwa1
1.40042e-234	0.666524	0.782	0.488	2.80085e-231	8	Mgll
1.58466e-228	-0.385956	0.301	0.702	3.16933e-225	8	Nrxn1
4.45964e-223	0.939615	0.83	0.505	8.91928e-220	8	Pdlim3
2.18946e-222	0.720794	0.834	0.632	4.37892e-219	8	Ahnak2
2.09032e-219	0.980215	0.841	0.504	4.18065e-216	8	Lmcd1
2.22e-216	0.897064	0.996	0.931	4.43999e-213	8	Ogn
3.65928e-216	1.5351	0.988	0.912	7.31855e-213	8	Atf3
2.23676e-212	-0.306867	0.566	0.761	4.47352e-209	8	Cbfa2t3
1.7572e-211	0.871387	0.997	0.908	3.51441e-208	8	Sparcl1
5.08098e-209	-0.297868	0.253	0.68	1.0162e-205	8	Gsta2
6.61917e-206	0.750516	0.844	0.658	1.32383e-202	8	Aoc3
8.0096e-204	-0.273077	0.16	0.574	1.60192e-200	8	Bpifb4
5.46666e-201	1.03162	0.946	0.779	1.09333e-197	8	Mfap5
2.36709e-194	0.958154	0.769	0.402	4.73418e-191	8	Id4
2.01764e-192	0.913928	0.762	0.525	4.03528e-189	8	Ramp1
2.50582e-191	0.714109	0.825	0.565	5.01164e-188	8	Myocd
3.62416e-188	0.838226	0.872	0.663	7.24833e-185	8	4930523C07Rik
1.54702e-186	0.773938	0.918	0.712	3.09404e-183	8	Cavin2
5.06199e-178	0.759478	0.964	0.821	1.0124e-174	8	Grb14
1.72744e-177	1.0416	0.79	0.541	3.45487e-174	8	Des
1.81388e-176	0.968112	0.845	0.559	3.62776e-173	8	Aspn
1.2783e-173	0.959147	0.802	0.565	2.5566e-170	8	Filip1l
6.69685e-173	0.782485	0.915	0.714	1.33937e-169	8	Ppp1r14a
6.16886e-163	0.479339	0.742	0.486	1.23377e-159	8	Pdlim5
1.09487e-160	0.395603	0.728	0.469	2.18973e-157	8	Postn
3.18973e-160	1.02924	0.94	0.772	6.37946e-157	8	Cxcl14
7.3779e-159	-0.434304	0.676	0.775	1.47558e-155	8	Colec11
6.45308e-158	0.45603	0.808	0.645	1.29062e-154	8	Ehd4
1.88713e-153	0.364464	0.753	0.459	3.77427e-150	8	Pdgfrl
1.44597e-150	1.26883	0.701	0.446	2.89194e-147	8	Myoc
[truncated: 3,134 more rows]
