# Supplementary material for: Distinct waves of ovarian follicles contribute to mouse oocyte production
Source: eLife. 2025 Oct 7;14:RP107352. doi: 10.7554/eLife.107352 (PMC12503487; doi:10.7554/eLife.107352)
Supplement: Source data 6. — Excel file with three sheets: (1) Cells_in_initial_clusters: cell numbers in initial clusters (c0–c30) (Column A). (2) Cells_in_granulosa_recluster: cell numbers in re-clustered granulosa cell clusters (gc0–gc17) (Column A). (3) Cells_in_mesenchymal_recluster: cell numbers in re-clustered mesenchymal cell clusters g0–g20 (Column A). Row 3: sample names. [file elife-107352-data6.xlsx]

## Sheet: Cells_in_initial_cluster
Source data 6. Cell numbers in initial clusters c0–c30
Initial	O2w	O3w	O4w	O5w	O6w
0	670	711	723	737	1043		3884		48163
1	313	475	1270	549	1000		3607
2	945	848	496	284	449		3022
3	71	128	1229	715	831		2974
4	463	394	547	588	879		2871
5	514	635	701	319	565		2734
6	551	637	902	162	459		2711
7	664	623	343	232	635		2497
8	651	582	520	267	449		2469
9	639	554	335	301	479		2308
10	270	402	793	338	491		2294
11	270	254	372	563	519		1978
12	544	559	308	157	254		1822
13	566	355	277	191	242		1631
14	325	245	369	72	480		1491
15	429	313	262	119	360		1483
16	136	247	277	605	140		1405
17	154	198	288	216	307		1163
18	139	129	139	205	251		863
19	255	244	150	131	51		831
20	70	105	204	260	162		801
21	296	193	118	71	62		740
22	118	68	99	267	160		712
23	51	50	84	181	129		495
24	75	106	127	36	92		436
25	108	48	49	52	64		321
26	74	83	35	35	6		233
27	47	36	53	81	14		231
28	54	31	5	1	0		91
29	0	0	0	44	1		45
30	9	0	2	0	9		20
totals	9471	9253	11077	7779	10583				48163

## Sheet: Cells_in_granulosa_recluster
Cell numbers in re-clustered granulosa cell clusters gc0–gc17
Granulosa	O2w	O3w	O4w	O5w	O6w
0	76	122	766	539	602		2105		18435
1	597	572	341	171	285		1966
2	172	315	640	229	311		1667
3	485	504	274	139	204		1606
4	206	304	408	184	352		1454
5	127	188	462	190	266		1233
6	1	16	582	227	308		1134
7	61	118	443	160	230		1012
8	309	238	118	91	161		917
9	283	255	147	87	123		895
10	96	142	154	125	329		846
11	316	206	124	81	81		808
12	100	171	245	106	154		776
13	27	12	179	76	180		474
14	104	86	113	43	105		451
15	73	110	126	35	75		419
16	71	75	94	37	75		352
17	3	17	32	209	59		320
totals	3107	3451	5248	2729	3900				18435

## Sheet: Cells_in_mesenchymal_recluster
Cell numbers in re-clustered mesenchymal cell clusters g0–g20
Mesenchynal	O2w	O3w	O4w	O5w	O6w
0	612	549	261	173	473		2068		19557
1	332	397	390	388	555		2062
2	483	410	352	200	310		1755
3	280	246	368	340	435		1669
4	262	315	372	262	363		1574
5	314	316	206	180	294		1310
6	176	175	192	252	509		1304
7	355	261	193	146	220		1175
8	237	181	200	209	314		1141
9	60	119	170	479	49		877
10	230	222	133	126	45		756
11	110	158	133	123	103		627
12	181	98	91	74	112		556
13	178	150	90	47	69		534
14	66	69	96	136	156		523
15	184	98	91	67	75		515
16	60	76	76	40	74		326
17	84	113	42	42	10		291
18	38	13	17	4	4		76
19	300	24	16	5	2		347
20	0	1	6	10	54		71
totals	4542	3991	3495	3303	4226				19557
